# Supplementary material for: Novel Iron Chelator SK4 Drives Cytotoxicity through Inhibiting Mitochondrial Metabolism in Ovarian and Triple Negative Breast Cancer Cell Lines
Source: Biomedicines. 2023 Jul 24;11(7):2073. doi: 10.3390/biomedicines11072073 (PMC10377004; doi:10.3390/biomedicines11072073)
Supplement: Supplementary file 1 [file biomedicines-11-02073-s001.zip]

Archive with 7 entries (7 files):
- Supplementary figure S1 .pdf
- Table S1.xlsx
- Table S2.xlsx
- Table S3.csv
- Table S4.xlsx
- Table S5.txt
- Table S6.txt
