# Supplementary material for: Novel Iron Chelator SK4 Drives Cytotoxicity through Inhibiting Mitochondrial Metabolism in Ovarian and Triple Negative Breast Cancer Cell Lines
Source: Biomedicines. 2023 Jul 24;11(7):2073. doi: 10.3390/biomedicines11072073 (PMC10377004; doi:10.3390/biomedicines11072073)
Supplement: Supplementary file 1 [file biomedicines-11-02073-s001.zip › Table S1.xlsx]

## Sheet: in
	logFC	AveExpr	t	P.Value	adj.P.Val	B	Genes	description	gene_biotype
P4HA1	1.28584	16.9225	16.2749	3.07e-07	0.000580253	6.8846	P13674	prolyl 4-hydroxylase subunit alpha 1 [Source:HGNC Symbol;Acc:HGNC:8546]	protein_coding
P4HA2	1.55325	15.9641	14.1207	8.87e-07	0.00116679	6.10403	O15460	prolyl 4-hydroxylase subunit alpha 2 [Source:HGNC Symbol;Acc:HGNC:8547]	protein_coding
RRM2	1.40025	16.0984	13.1198	1.53e-06	0.00161092	5.6749	P31350	ribonucleotide reductase regulatory subunit M2 [Source:HGNC Symbol;Acc:HGNC:10452]	protein_coding
NDUFS1	-0.851498	15.9905	-11.3198	4.53e-06	0.00397501	4.77067	P28331	NADH:ubiquinone oxidoreductase core subunit S1 [Source:HGNC Symbol;Acc:HGNC:7707]	protein_coding
PPAT	-0.859596	15.1465	-10.701	6.83e-06	0.00401192	4.4136	Q06203	phosphoribosyl pyrophosphate amidotransferase [Source:HGNC Symbol;Acc:HGNC:9238]	protein_coding
ANLN	0.856607	17.885	10.5392	7.63e-06	0.00401192	4.31585	Q9NQW6	anillin, actin binding protein [Source:HGNC Symbol;Acc:HGNC:14082]	protein_coding
SDHB	-0.951841	16.401	-9.9905	1.12e-05	0.00536752	3.96976	P21912	succinate dehydrogenase complex iron sulfur subunit B [Source:HGNC Symbol;Acc:HGNC:10681]	protein_coding
COL18A1	2.28031	12.9024	9.29698	1.88e-05	0.00760683	3.49788	P39060	collagen type XVIII alpha 1 chain [Source:HGNC Symbol;Acc:HGNC:2195]	protein_coding
MAK16	-1.01258	14.0042	-8.71488	2.97e-05	0.0106181	3.06922	Q9BXY0	MAK16 homolog [Source:HGNC Symbol;Acc:HGNC:13703]	protein_coding
HK2	0.69493	17.095	8.54958	3.4e-05	0.0110048	2.94166	P52789	hexokinase 2 [Source:HGNC Symbol;Acc:HGNC:4923]	protein_coding
SNX17	-0.782777	14.3591	-8.49673	3.56e-05	0.0110048	2.9003	Q15036	sorting nexin 17 [Source:HGNC Symbol;Acc:HGNC:14979]	protein_coding
COL5A1	2.14014	12.7586	8.35907	3.99e-05	0.0112465	2.79128	P20908	collagen type V alpha 1 chain [Source:HGNC Symbol;Acc:HGNC:2209]	protein_coding
ADI1	-1.14297	15.5496	-8.33732	4.06e-05	0.0112465	2.77388	Q9BV57	acireductone dioxygenase 1 [Source:HGNC Symbol;Acc:HGNC:30576]	protein_coding
NDUFA2	-1.15609	14.7667	-8.02983	5.28e-05	0.0132796	2.52259	O43678	NADH:ubiquinone oxidoreductase subunit A2 [Source:HGNC Symbol;Acc:HGNC:7685]	protein_coding
PDK1	1.52897	13.1833	7.70306	7.04e-05	0.0168426	2.24441	Q15118	pyruvate dehydrogenase kinase 1 [Source:HGNC Symbol;Acc:HGNC:8809]	protein_coding
NDUFS4	-0.634903	13.6805	-7.57701	7.89e-05	0.0176109	2.13392	O43181	NADH:ubiquinone oxidoreductase subunit S4 [Source:HGNC Symbol;Acc:HGNC:7711]	protein_coding
MKI67	0.516783	19.027	6.91521	0.000147053	0.0274273	1.52292	P46013	marker of proliferation Ki-67 [Source:HGNC Symbol;Acc:HGNC:7107]	protein_coding
ELP3	-0.950635	13.7466	-6.8868	0.000151186	0.0274273	1.49549	Q9H9T3	elongator acetyltransferase complex subunit 3 [Source:HGNC Symbol;Acc:HGNC:20696]	protein_coding
FADS2	-1.39389	13.9608	-6.54966	0.0002115	0.0338984	1.16189	O95864	fatty acid desaturase 2 [Source:HGNC Symbol;Acc:HGNC:3575]	protein_coding
AK4	0.692954	16.3385	6.63624	0.000193797	0.0338984	1.24899	P27144	adenylate kinase 4 [Source:HGNC Symbol;Acc:HGNC:363]	protein_coding
NOP53	-0.955584	13.0451	-6.56303	0.000208651	0.0338984	1.17541	Q9NZM5	NOP53 ribosome biogenesis factor [Source:HGNC Symbol;Acc:HGNC:4333]	protein_coding
TFRC	1.021	19.2765	6.13283	0.00032608	0.0441272	0.728299	P02786	transferrin receptor [Source:HGNC Symbol;Acc:HGNC:11763]	protein_coding
DDX49	-0.452614	13.3334	-6.15955	0.000316959	0.0441272	0.75682	Q9Y6V7	DEAD-box helicase 49 [Source:HGNC Symbol;Acc:HGNC:18684]	protein_coding
NDUFS3	-0.512749	16.3397	-6.03984	0.000360156	0.0455169	0.628268	O75489	NADH:ubiquinone oxidoreductase core subunit S3 [Source:HGNC Symbol;Acc:HGNC:7710]	protein_coding
AXL	-0.509579	16.4846	-6.0768	0.000346161	0.0455169	0.668176	P30530	AXL receptor tyrosine kinase [Source:HGNC Symbol;Acc:HGNC:905]	protein_coding
LOX	1.79805	13.4771	5.92215	0.000409066	0.0476426	0.499868	P28300	lysyl oxidase [Source:HGNC Symbol;Acc:HGNC:6664]	protein_coding
SMTN	0.693666	15.6295	5.91737	0.000411202	0.0476426	0.494613	P53814	smoothelin [Source:HGNC Symbol;Acc:HGNC:11126]	protein_coding
TTC38	-0.53243	14.2084	-5.93792	0.000402102	0.0476426	0.517197	Q5R3I4	tetratricopeptide repeat domain 38 [Source:HGNC Symbol;Acc:HGNC:26082]	protein_coding
KIFC1	0.710718	15.5528	5.90022	0.000418966	0.0476426	0.475727	Q9BW19	kinesin family member C1 [Source:HGNC Symbol;Acc:HGNC:6389]	protein_coding
INCENP	0.519258	14.5978	5.8662	0.000434854	0.0476618	0.438134	Q9NQS7	inner centromere protein [Source:HGNC Symbol;Acc:HGNC:6058]	protein_coding
ENO2	0.687837	20.776	5.81456	0.000460263	0.0484288	0.380738	P09104	enolase 2 [Source:HGNC Symbol;Acc:HGNC:3353]	protein_coding
UBR2	-0.94553	11.2831	-5.65759	0.000548122	0.0554552	0.203865	Q8IWV8	ubiquitin protein ligase E3 component n-recognin 2 [Source:HGNC Symbol;Acc:HGNC:21289]	protein_coding
NDUFS5	-0.763908	14.2775	-5.55874	0.000612872	0.0597096	0.0905971	O43920	NADH:ubiquinone oxidoreductase subunit S5 [Source:HGNC Symbol;Acc:HGNC:7712]	protein_coding
TGFB2	-0.703572	13.4107	-5.5369	0.000628288	0.0600986	0.0653738	P61812	transforming growth factor beta 2 [Source:HGNC Symbol;Acc:HGNC:11768]	protein_coding
LDHA	0.445765	21.6474	5.458	0.000687655	0.0634694	-0.0263622	P00338	lactate dehydrogenase A [Source:HGNC Symbol;Acc:HGNC:6535]	protein_coding
MRPS18B	-0.663465	15.0299	-5.46233	0.00068424	0.0634694	-0.0213011	Q9Y676	mitochondrial ribosomal protein S18B [Source:HGNC Symbol;Acc:HGNC:14516]	protein_coding
FTL	-1.39319	17.2949	-5.42781	0.000711984	0.0645019	-0.0617139	P02792	ferritin light chain [Source:HGNC Symbol;Acc:HGNC:3999]	protein_coding
ATP6V1H	-0.367426	14.1591	-5.41407	0.000723363	0.0645019	-0.0778414	Q9UI12	ATPase H+ transporting V1 subunit H [Source:HGNC Symbol;Acc:HGNC:18303]	protein_coding
NDUFS2	-0.686682	14.9258	-5.3843	0.000748722	0.0656505	-0.112897	O75306	NADH:ubiquinone oxidoreductase core subunit S2 [Source:HGNC Symbol;Acc:HGNC:7708]	protein_coding
NDRG1	1.53151	16.6401	5.26833	0.000857278	0.0715895	-0.250774	Q92597	N-myc downstream regulated 1 [Source:HGNC Symbol;Acc:HGNC:7679]	protein_coding
GNL3	-0.624484	16.4529	-5.26883	0.000856769	0.0715895	-0.250169	Q9BVP2	G protein nucleolar 3 [Source:HGNC Symbol;Acc:HGNC:29931]	protein_coding
SREK1	-0.590159	13.9804	-5.24548	0.000880641	0.0723915	-0.278179	Q8WXA9	splicing regulatory glutamic acid and lysine rich protein 1 [Source:HGNC Symbol;Acc:HGNC:17882]	protein_coding
LAMA5	-0.925327	12.9211	-5.14555	0.000991395	0.0788982	-0.399003	O15230	laminin subunit alpha 5 [Source:HGNC Symbol;Acc:HGNC:6485]	protein_coding
IFIT1	-0.454631	14.9285	-5.1343	0.00100479	0.0788982	-0.412696	P09914	interferon induced protein with tetratricopeptide repeats 1 [Source:HGNC Symbol;Acc:HGNC:5407]	protein_coding
NDUFS6	-0.903219	13.4057	-5.11626	0.00102669	0.079309	-0.434707	O75380	NADH:ubiquinone oxidoreductase subunit S6 [Source:HGNC Symbol;Acc:HGNC:7713]	protein_coding
MAP2K1	0.318624	15.5436	5.1043	0.0010415	0.079309	-0.449331	Q02750	mitogen-activated protein kinase kinase 1 [Source:HGNC Symbol;Acc:HGNC:6840]	protein_coding
WDR74	-0.630171	14.9802	-5.09271	0.00105607	0.079309	-0.463512	Q6RFH5	WD repeat domain 74 [Source:HGNC Symbol;Acc:HGNC:25529]	protein_coding
CKAP2	0.616866	14.1391	5.08155	0.00107032	0.079309	-0.477198	Q8WWK9	cytoskeleton associated protein 2 [Source:HGNC Symbol;Acc:HGNC:1990]	protein_coding
CSRP2	0.713395	15.0348	5.01477	0.00116008	0.0847667	-0.55947	Q16527	cysteine and glycine rich protein 2 [Source:HGNC Symbol;Acc:HGNC:2470]	protein_coding
RPF1	-1.40227	12.6575	-4.92096	0.00130045	0.0937213	-0.676235	Q9H9Y2	ribosome production factor 1 homolog [Source:HGNC Symbol;Acc:HGNC:30350]	protein_coding
PGK1	0.664572	19.878	4.86775	0.00138826	0.0961005	-0.743079	P00558	phosphoglycerate kinase 1 [Source:HGNC Symbol;Acc:HGNC:8896]	protein_coding
ITGA6	0.283631	17.7712	4.88058	0.0013665	0.0961005	-0.726918	P23229	integrin subunit alpha 6 [Source:HGNC Symbol;Acc:HGNC:6142]	protein_coding
NOP16	-0.315754	15.92	-4.86852	0.00138694	0.0961005	-0.742109	Q9Y3C1	NOP16 nucleolar protein [Source:HGNC Symbol;Acc:HGNC:26934]	protein_coding
ORC4	-0.992387	11.9656	-4.82969	0.00145504	0.0990859	-0.791157	O43929	origin recognition complex subunit 4 [Source:HGNC Symbol;Acc:HGNC:8490]	protein_coding
NFATC2	0.534786	13.3588	4.82195	0.00146906	0.0990859	-0.800971	Q13469	nuclear factor of activated T cells 2 [Source:HGNC Symbol;Acc:HGNC:7776]	protein_coding
PDCD5	0.29793	18.8034	4.79043	0.00152764	0.0995278	-0.841002	O14737	programmed cell death 5 [Source:HGNC Symbol;Acc:HGNC:8764]	protein_coding
PLOD1	0.357018	16.5376	4.78795	0.00153236	0.0995278	-0.844161	Q02809	procollagen-lysine,2-oxoglutarate 5-dioxygenase 1 [Source:HGNC Symbol;Acc:HGNC:9081]	protein_coding
NDUFA13	-0.740121	15.5717	-4.78992	0.0015286	0.0995278	-0.841644	Q9P0J0	NADH:ubiquinone oxidoreductase subunit A13 [Source:HGNC Symbol;Acc:HGNC:17194]	protein_coding
RPL7L1	-0.381099	16.4892	-4.71965	0.00166873	0.105532	-0.931465	Q6DKI1	ribosomal protein L7 like 1 [Source:HGNC Symbol;Acc:HGNC:21370]	protein_coding
PALM2AKAP2	0.481875	17.2355	4.71192	0.00168498	0.105532	-0.941395	Q9Y2D5	PALM2 and AKAP2 fusion [Source:HGNC Symbol;Acc:HGNC:33529]	protein_coding
YARS2	-0.386561	14.3791	-4.69337	0.0017247	0.106749	-0.965263	Q9Y2Z4	tyrosyl-tRNA synthetase 2 [Source:HGNC Symbol;Acc:HGNC:24249]	protein_coding
CHAF1B	0.459828	14.6313	4.65	0.00182159	0.108639	-1.02127	Q13112	chromatin assembly factor 1 subunit B [Source:HGNC Symbol;Acc:HGNC:1911]	protein_coding
UBE2S	0.344279	16.7496	4.65111	0.00181904	0.108639	-1.01983	Q16763	ubiquitin conjugating enzyme E2 S [Source:HGNC Symbol;Acc:HGNC:17895]	protein_coding
NOP9	-0.486931	12.742	-4.64297	0.00183784	0.108639	-1.03036	Q86U38	NOP9 nucleolar protein [Source:HGNC Symbol;Acc:HGNC:19826]	protein_coding
LAMB3	0.401492	14.5952	4.57156	0.00201228	0.117629	-1.12331	Q13751	laminin subunit beta 3 [Source:HGNC Symbol;Acc:HGNC:6490]	protein_coding
NDUFAF3	-0.556758	14.4919	-4.54648	0.00207776	0.120122	-1.15614	Q9BU61	NADH:ubiquinone oxidoreductase complex assembly factor 3 [Source:HGNC Symbol;Acc:HGNC:29918]	protein_coding
EFHD2	0.392622	16.7659	4.49519	0.00221904	0.124195	-1.22359	Q96C19	EF-hand domain family member D2 [Source:HGNC Symbol;Acc:HGNC:28670]	protein_coding
ADAM10	-0.29117	14.9334	-4.41702	0.00245485	0.132576	-1.32717	O14672	ADAM metallopeptidase domain 10 [Source:HGNC Symbol;Acc:HGNC:188]	protein_coding
COL4A2	0.945246	13.4248	4.41241	0.00246958	0.132576	-1.33331	P08572	collagen type IV alpha 2 chain [Source:HGNC Symbol;Acc:HGNC:2203]	protein_coding
MRPS25	-0.491035	14.2875	-4.39465	0.00252725	0.132958	-1.35698	P82663	mitochondrial ribosomal protein S25 [Source:HGNC Symbol;Acc:HGNC:14511]	protein_coding
DCAF1	-0.342042	13.5798	-4.3991	0.00251267	0.132958	-1.35105	Q9Y4B6	DDB1 and CUL4 associated factor 1 [Source:HGNC Symbol;Acc:HGNC:30911]	protein_coding
LGALS3BP	-0.272041	16.9654	-4.36822	0.00261581	0.133609	-1.39232	Q08380	galectin 3 binding protein [Source:HGNC Symbol;Acc:HGNC:6564]	protein_coding
NDUFA8	-0.511483	14.9706	-4.27617	0.00295155	0.147789	-1.5162	P51970	NADH:ubiquinone oxidoreductase subunit A8 [Source:HGNC Symbol;Acc:HGNC:7692]	protein_coding
FTH1	-1.62558	14.3348	-4.23425	0.00311974	0.151972	-1.57306	P02794	ferritin heavy chain 1 [Source:HGNC Symbol;Acc:HGNC:3976]	protein_coding
TMEM106B	-0.3138	15.1269	-4.2185	0.00318556	0.153754	-1.59449	Q9NUM4	transmembrane protein 106B [Source:HGNC Symbol;Acc:HGNC:22407]	protein_coding
ACSL4	-0.434667	16.3362	-4.20583	0.00323963	0.154609	-1.61175	O60488	acyl-CoA synthetase long chain family member 4 [Source:HGNC Symbol;Acc:HGNC:3571]	protein_coding
NDUFA12	-0.646445	14.337	-4.20065	0.00326204	0.154609	-1.61883	Q9UI09	NADH:ubiquinone oxidoreductase subunit A12 [Source:HGNC Symbol;Acc:HGNC:23987]	protein_coding
ZC3HAV1L	0.301595	13.0757	4.16023	0.00344262	0.161711	-1.67411	Q96H79	zinc finger CCCH-type containing, antiviral 1 like [Source:HGNC Symbol;Acc:HGNC:22423]	protein_coding
OAT	-0.294774	17.1259	-4.13579	0.00355702	0.162726	-1.70764	P04181	ornithine aminotransferase [Source:HGNC Symbol;Acc:HGNC:8091]	protein_coding
NDUFAF4	-0.621447	14.142	-4.14591	0.00350917	0.162726	-1.69375	Q9P032	NADH:ubiquinone oxidoreductase complex assembly factor 4 [Source:HGNC Symbol;Acc:HGNC:21034]	protein_coding
PYCARD	-0.394433	13.5157	-4.13758	0.00354852	0.162726	-1.70519	Q9ULZ3	PYD and CARD domain containing [Source:HGNC Symbol;Acc:HGNC:16608]	protein_coding
PTX3	0.611706	13.374	4.08717	0.00379707	0.169359	-1.77464	P26022	pentraxin 3 [Source:HGNC Symbol;Acc:HGNC:9692]	protein_coding
MRPS15	-0.676185	14.2308	-4.07064	0.00388261	0.17165	-1.79749	P82914	mitochondrial ribosomal protein S15 [Source:HGNC Symbol;Acc:HGNC:14504]	protein_coding
MT-ND1	-0.953437	14.0209	-4.05152	0.0039842	0.174674	-1.82399	P03886	mitochondrially encoded NADH:ubiquinone oxidoreductase core subunit 1 [Source:HGNC Symbol;Acc:HGNC:7455]	protein_coding
H1-10	-0.7854	15.3165	-4.02305	0.00414082	0.177113	-1.86353	Q92522	H1.10 linker histone [Source:HGNC Symbol;Acc:HGNC:4722]	protein_coding
RGS10	0.339423	16.5363	3.98958	0.00433346	0.179751	-1.91017	O43665	regulator of G protein signaling 10 [Source:HGNC Symbol;Acc:HGNC:9992]	protein_coding
CDS2	-0.63112	13.3787	-3.99974	0.00427396	0.179751	-1.89599	O95674	CDP-diacylglycerol synthase 2 [Source:HGNC Symbol;Acc:HGNC:1801]	protein_coding
FECH	-1.16763	13.2197	-3.98226	0.00437689	0.179751	-1.92039	P22830	ferrochelatase [Source:HGNC Symbol;Acc:HGNC:3647]	protein_coding
WDR75	-0.259005	14.4696	-3.99096	0.00432532	0.179751	-1.90824	Q8IWA0	WD repeat domain 75 [Source:HGNC Symbol;Acc:HGNC:25725]	protein_coding
VANGL1	-0.334129	13.4665	-3.98357	0.0043691	0.179751	-1.91857	Q8TAA9	VANGL planar cell polarity protein 1 [Source:HGNC Symbol;Acc:HGNC:15512]	protein_coding
MRPL30	-0.904478	12.9323	-3.97077	0.00444599	0.179926	-1.93646	Q8TCC3	mitochondrial ribosomal protein L30 [Source:HGNC Symbol;Acc:HGNC:14036]	protein_coding
ACACA	-0.337993	16.144	-3.95986	0.00451266	0.180022	-1.95172	Q13085	acetyl-CoA carboxylase alpha [Source:HGNC Symbol;Acc:HGNC:84]	protein_coding
TPX2	0.474298	16.9195	3.95423	0.00454749	0.180022	-1.9596	Q9ULW0	TPX2 microtubule nucleation factor [Source:HGNC Symbol;Acc:HGNC:1249]	protein_coding
DAG1	-0.672321	13.1185	-3.93797	0.00464979	0.181204	-1.98241	Q14118	dystroglycan 1 [Source:HGNC Symbol;Acc:HGNC:2666]	protein_coding
OGA	0.268385	15.5332	3.86425	0.00514551	0.194752	-2.08625	O60502	O-GlcNAcase [Source:HGNC Symbol;Acc:HGNC:7056]	protein_coding
A2M	-0.530922	12.5605	-3.85643	0.00520131	0.194871	-2.0973	P01023	alpha-2-macroglobulin [Source:HGNC Symbol;Acc:HGNC:7]	protein_coding
H4C1	-0.348568	23.8387	-3.85346	0.00522275	0.194871	-2.10152	P62805	H4 clustered histone 1 [Source:HGNC Symbol;Acc:HGNC:4781]	protein_coding
LLPH	-0.425454	15.8905	-3.84234	0.00530357	0.196493	-2.11725	Q9BRT6	LLP homolog, long-term synaptic facilitation factor [Source:HGNC Symbol;Acc:HGNC:28229]	protein_coding
UQCRQ	-0.213314	16.4918	-3.80773	0.00556406	0.200893	-2.16638	O14949	ubiquinol-cytochrome c reductase complex III subunit VII [Source:HGNC Symbol;Acc:HGNC:29594]	protein_coding
PHLDA2	0.40857	14.5982	3.80811	0.00556114	0.200893	-2.16584	Q53GA4	pleckstrin homology like domain family A member 2 [Source:HGNC Symbol;Acc:HGNC:12385]	protein_coding
COL13A1	0.930728	13.9013	3.80631	0.00557506	0.200893	-2.1684	Q5TAT6	collagen type XIII alpha 1 chain [Source:HGNC Symbol;Acc:HGNC:2190]	protein_coding
UBE4B	-0.235586	13.3881	-3.77508	0.00582244	0.205583	-2.21287	O95155	ubiquitination factor E4B [Source:HGNC Symbol;Acc:HGNC:12500]	protein_coding
PRKCD	0.312277	13.8375	3.77871	0.00579308	0.205583	-2.2077	Q05655	protein kinase C delta [Source:HGNC Symbol;Acc:HGNC:9399]	protein_coding
UTP20	-0.357395	14.2705	-3.7552	0.00598608	0.208561	-2.24126	O75691	UTP20 small subunit processome component [Source:HGNC Symbol;Acc:HGNC:17897]	protein_coding
H1-2	-0.745801	19.5715	-3.74281	0.00609047	0.209029	-2.25896	P16403	H1.2 linker histone, cluster member [Source:HGNC Symbol;Acc:HGNC:4716]	protein_coding
RAB20	0.877564	12.3375	3.73951	0.00611869	0.209029	-2.26369	Q9NX57	RAB20, member RAS oncogene family [Source:HGNC Symbol;Acc:HGNC:18260]	protein_coding
NPC1	-0.436126	14.9859	-3.69173	0.00654229	0.211159	-2.33221	O15118	NPC intracellular cholesterol transporter 1 [Source:HGNC Symbol;Acc:HGNC:7897]	protein_coding
DEGS1	0.588705	16.3569	3.7083	0.00639192	0.211159	-2.30841	O15121	delta 4-desaturase, sphingolipid 1 [Source:HGNC Symbol;Acc:HGNC:13709]	protein_coding
PLOD3	0.268944	16.9013	3.70049	0.0064623	0.211159	-2.31962	O60568	procollagen-lysine,2-oxoglutarate 5-dioxygenase 3 [Source:HGNC Symbol;Acc:HGNC:9083]	protein_coding
SFN	0.406424	17.0989	3.69584	0.00650464	0.211159	-2.3263	P31947	stratifin [Source:HGNC Symbol;Acc:HGNC:10773]	protein_coding
GTF2B	-0.778517	12.663	-3.69183	0.0065413	0.211159	-2.33205	Q00403	general transcription factor IIB [Source:HGNC Symbol;Acc:HGNC:4648]	protein_coding
KIF2C	0.263844	16.9347	3.69888	0.00647691	0.211159	-2.32193	Q99661	kinesin family member 2C [Source:HGNC Symbol;Acc:HGNC:6393]	protein_coding
MPZL1	-1.25865	12.7138	-3.66787	0.00676551	0.214457	-2.36654	O95297	myelin protein zero like 1 [Source:HGNC Symbol;Acc:HGNC:7226]	protein_coding
CCDC127	-0.552279	11.9529	-3.66041	0.00683693	0.214985	-2.37728	Q96BQ5	coiled-coil domain containing 127 [Source:HGNC Symbol;Acc:HGNC:30520]	protein_coding
MORC2	-0.425439	12.4818	-3.65749	0.00686515	0.214985	-2.3815	Q9Y6X9	MORC family CW-type zinc finger 2 [Source:HGNC Symbol;Acc:HGNC:23573]	protein_coding
TOP2A	0.254433	17.8786	3.59531	0.00749586	0.229001	-2.47138	P11388	DNA topoisomerase II alpha [Source:HGNC Symbol;Acc:HGNC:11989]	protein_coding
GTF2I	-0.230019	18.208	-3.59994	0.00744687	0.229001	-2.46468	P78347	general transcription factor IIi [Source:HGNC Symbol;Acc:HGNC:4659]	protein_coding
PXDN	0.309778	13.8247	3.59208	0.00753036	0.229001	-2.47607	Q92626	peroxidasin [Source:HGNC Symbol;Acc:HGNC:14966]	protein_coding
MFGE8	-0.283664	14.3935	-3.58638	0.00759142	0.229531	-2.48433	Q08431	milk fat globule EGF and factor V/VIII domain containing [Source:HGNC Symbol;Acc:HGNC:7036]	protein_coding
ABCC4	-0.623682	12.9927	-3.55889	0.00789393	0.230396	-2.52426	O15439	ATP binding cassette subfamily C member 4 [Source:HGNC Symbol;Acc:HGNC:55]	protein_coding
ZWINT	0.340034	14.097	3.57326	0.00773425	0.230396	-2.50338	O95229	ZW10 interacting kinetochore protein [Source:HGNC Symbol;Acc:HGNC:13195]	protein_coding
NDUFC2	-0.895588	14.6451	-3.55243	0.00796682	0.230396	-2.53365	O95298	NADH:ubiquinone oxidoreductase subunit C2 [Source:HGNC Symbol;Acc:HGNC:7706]	protein_coding
APP	-0.411319	15.2596	-3.53291	0.00819163	0.230396	-2.56208	P05067	amyloid beta precursor protein [Source:HGNC Symbol;Acc:HGNC:620]	protein_coding
HMGCS1	-0.52988	13.6733	-3.52593	0.00827358	0.230396	-2.57224	Q01581	3-hydroxy-3-methylglutaryl-CoA synthase 1 [Source:HGNC Symbol;Acc:HGNC:5007]	protein_coding
GBE1	0.341841	16.8846	3.57862	0.0076756	0.230396	-2.4956	Q04446	1,4-alpha-glucan branching enzyme 1 [Source:HGNC Symbol;Acc:HGNC:4180]	protein_coding
COASY	-0.333623	14.374	-3.5679	0.00779336	0.230396	-2.51116	Q13057	Coenzyme A synthase [Source:HGNC Symbol;Acc:HGNC:29932]	protein_coding
NDUFA9	-0.491445	15.7082	-3.54921	0.00800345	0.230396	-2.53834	Q16795	NADH:ubiquinone oxidoreductase subunit A9 [Source:HGNC Symbol;Acc:HGNC:7693]	protein_coding
PPFIBP1	0.299616	14.5001	3.56198	0.00785926	0.230396	-2.51976	Q86W92	PPFIA binding protein 1 [Source:HGNC Symbol;Acc:HGNC:9249]	protein_coding
SLC39A10	0.803297	12.9409	3.54099	0.00809781	0.230396	-2.55031	Q9ULF5	solute carrier family 39 member 10 [Source:HGNC Symbol;Acc:HGNC:20861]	protein_coding
MAFF	0.837427	14.932	3.53589	0.00815681	0.230396	-2.55773	Q9ULX9	MAF bZIP transcription factor F [Source:HGNC Symbol;Acc:HGNC:6780]	protein_coding
NENF	0.463456	15.2789	3.52481	0.00828684	0.230396	-2.57388	Q9UMX5	neudesin neurotrophic factor [Source:HGNC Symbol;Acc:HGNC:30384]	protein_coding
WDR3	-0.431102	14.5537	-3.52607	0.00827195	0.230396	-2.57204	Q9UNX4	WD repeat domain 3 [Source:HGNC Symbol;Acc:HGNC:12755]	protein_coding
UQCRFS1	-0.301548	15.7324	-3.4721	0.00893628	0.245648	-2.65091	P47985	ubiquinol-cytochrome c reductase, Rieske iron-sulfur polypeptide 1 [Source:HGNC Symbol;Acc:HGNC:12587]	protein_coding
PDSS2	0.854243	11.848	3.46625	0.0090116	0.245648	-2.65947	Q86YH6	decaprenyl diphosphate synthase subunit 2 [Source:HGNC Symbol;Acc:HGNC:23041]	protein_coding
TJP2	0.245793	19.8968	3.46927	0.00897265	0.245648	-2.65505	Q9UDY2	tight junction protein 2 [Source:HGNC Symbol;Acc:HGNC:11828]	protein_coding
PFKL	0.264633	16.5752	3.43265	0.00945774	0.252575	-2.70877	P17858	phosphofructokinase, liver type [Source:HGNC Symbol;Acc:HGNC:8876]	protein_coding
ECM1	0.84352	12.7831	3.4331	0.00945162	0.252575	-2.7081	Q16610	extracellular matrix protein 1 [Source:HGNC Symbol;Acc:HGNC:3153]	protein_coding
UQCRC2	-0.210169	16.9323	-3.40795	0.00980061	0.253245	-2.74507	P22695	ubiquinol-cytochrome c reductase core protein 2 [Source:HGNC Symbol;Acc:HGNC:12586]	protein_coding
ME1	-0.351456	13.7364	-3.40321	0.00986793	0.253245	-2.75205	P48163	malic enzyme 1 [Source:HGNC Symbol;Acc:HGNC:6983]	protein_coding
MRPS9	-0.300943	14.5209	-3.42115	0.00961575	0.253245	-2.72566	P82933	mitochondrial ribosomal protein S9 [Source:HGNC Symbol;Acc:HGNC:14501]	protein_coding
TOMM34	0.275482	18.3328	3.42181	0.00960655	0.253245	-2.72468	Q15785	translocase of outer mitochondrial membrane 34 [Source:HGNC Symbol;Acc:HGNC:15746]	protein_coding
HABP4	-0.753138	15.7092	-3.4134	0.00972376	0.253245	-2.73705	Q5JVS0	hyaluronan binding protein 4 [Source:HGNC Symbol;Acc:HGNC:17062]	protein_coding
MRPL1	-0.271843	14.867	-3.40408	0.00985548	0.253245	-2.75077	Q9BYD6	mitochondrial ribosomal protein L1 [Source:HGNC Symbol;Acc:HGNC:14275]	protein_coding
TEX264	0.216515	15.8349	3.41992	0.00963275	0.253245	-2.72746	Q9Y6I9	testis expressed 264, ER-phagy receptor [Source:HGNC Symbol;Acc:HGNC:30247]	protein_coding
CNPY3	0.271533	15.5648	3.38477	0.0101344	0.258822	-2.77921	Q9BT09	canopy FGF signaling regulator 3 [Source:HGNC Symbol;Acc:HGNC:11968]	protein_coding
NIF3L1	-0.221737	14.9861	-3.37779	0.0102373	0.260184	-2.7895	Q9GZT8	NGG1 interacting factor 3 like 1 [Source:HGNC Symbol;Acc:HGNC:13390]	protein_coding
CD44	0.214841	19.3904	3.34898	0.0106738	0.266356	-2.83203	P16070	CD44 molecule (Indian blood group) [Source:HGNC Symbol;Acc:HGNC:1681]	protein_coding
CMAS	0.371482	14.0092	3.32408	0.0110669	0.272071	-2.86886	Q8NFW8	cytidine monophosphate N-acetylneuraminic acid synthetase [Source:HGNC Symbol;Acc:HGNC:18290]	protein_coding
LNPK	0.469429	16.1724	3.3248	0.0110554	0.272071	-2.86779	Q9C0E8	lunapark, ER junction formation factor [Source:HGNC Symbol;Acc:HGNC:21610]	protein_coding
JUN	0.358823	15.3632	3.30469	0.0113838	0.276496	-2.89758	P05412	Jun proto-oncogene, AP-1 transcription factor subunit [Source:HGNC Symbol;Acc:HGNC:6204]	protein_coding
KIF14	-0.381988	13.3095	-3.30048	0.0114538	0.276496	-2.90382	Q15058	kinesin family member 14 [Source:HGNC Symbol;Acc:HGNC:19181]	protein_coding
PDK3	0.811064	13.0406	3.29738	0.0115057	0.276496	-2.90842	Q15120	pyruvate dehydrogenase kinase 3 [Source:HGNC Symbol;Acc:HGNC:8811]	protein_coding
EGLN1	0.434759	13.394	3.29714	0.0115097	0.276496	-2.90878	Q9GZT9	egl-9 family hypoxia inducible factor 1 [Source:HGNC Symbol;Acc:HGNC:1232]	protein_coding
GPI	0.295731	18.9157	3.27635	0.0118643	0.282435	-2.93963	P06744	glucose-6-phosphate isomerase [Source:HGNC Symbol;Acc:HGNC:4458]	protein_coding
UTP18	-0.244306	15.5673	-3.27684	0.0118557	0.282435	-2.9389	Q9Y5J1	UTP18 small subunit processome component [Source:HGNC Symbol;Acc:HGNC:24274]	protein_coding
CEMIP2	0.459228	13.2409	3.2621	0.0121139	0.28579	-2.9608	Q9UHN6	cell migration inducing hyaluronidase 2 [Source:HGNC Symbol;Acc:HGNC:11869]	protein_coding
RPL35A	-0.279006	19.8364	-3.24608	0.0124012	0.288686	-2.98463	P18077	ribosomal protein L35a [Source:HGNC Symbol;Acc:HGNC:10345]	protein_coding
STRN3	-0.341604	14.0676	-3.24676	0.0123888	0.288686	-2.98361	Q13033	striatin 3 [Source:HGNC Symbol;Acc:HGNC:15720]	protein_coding
FKBP5	0.266514	14.9348	3.24727	0.0123796	0.288686	-2.98285	Q13451	FKBP prolyl isomerase 5 [Source:HGNC Symbol;Acc:HGNC:3721]	protein_coding
ZZEF1	0.383209	13.4921	3.21057	0.0130639	0.298823	-3.0375	O43149	zinc finger ZZ-type and EF-hand domain containing 1 [Source:HGNC Symbol;Acc:HGNC:29027]	protein_coding
PUM3	-0.557675	15.093	-3.20501	0.0131712	0.299389	-3.04581	Q15397	pumilio RNA binding family member 3 [Source:HGNC Symbol;Acc:HGNC:29676]	protein_coding
RAD18	0.337503	14.6773	3.20339	0.0132025	0.299389	-3.04822	Q9NS91	RAD18 E3 ubiquitin protein ligase [Source:HGNC Symbol;Acc:HGNC:18278]	protein_coding
SDHC	-1.25237	13.6146	-3.19608	0.0133452	0.301327	-3.05913	Q99643	succinate dehydrogenase complex subunit C [Source:HGNC Symbol;Acc:HGNC:10682]	protein_coding
HPRT1	0.193655	17.736	3.17312	0.0138038	0.305135	-3.09342	P00492	hypoxanthine phosphoribosyltransferase 1 [Source:HGNC Symbol;Acc:HGNC:5157]	protein_coding
DHRS4	0.233715	15.0002	3.17344	0.0137973	0.305135	-3.09293	Q9BTZ2	dehydrogenase/reductase 4 [Source:HGNC Symbol;Acc:HGNC:16985]	protein_coding
PROSER2	0.454395	14.6149	3.15576	0.0141615	0.31173	-3.11936	Q86WR7	proline and serine rich 2 [Source:HGNC Symbol;Acc:HGNC:23728]	protein_coding
TACC1	0.287849	15.7898	3.13541	0.0145935	0.314387	-3.14982	O75410	transforming acidic coiled-coil containing protein 1 [Source:HGNC Symbol;Acc:HGNC:11522]	protein_coding
GGCX	-0.28914	14.5471	-3.13294	0.0146468	0.314387	-3.15352	P38435	gamma-glutamyl carboxylase [Source:HGNC Symbol;Acc:HGNC:4247]	protein_coding
NFKB2	0.242826	14.4046	3.1443	0.0144031	0.314387	-3.13651	Q00653	nuclear factor kappa B subunit 2 [Source:HGNC Symbol;Acc:HGNC:7795]	protein_coding
PRPF4B	-0.349313	14.7572	-3.13619	0.0145766	0.314387	-3.14864	Q13523	pre-mRNA processing factor 4B [Source:HGNC Symbol;Acc:HGNC:17346]	protein_coding
STRBP	-0.383209	13.0174	-3.14372	0.0144154	0.314387	-3.13738	Q96SI9	spermatid perinuclear RNA binding protein [Source:HGNC Symbol;Acc:HGNC:16462]	protein_coding
TCF25	-0.560841	13.9035	-3.12974	0.0147162	0.314387	-3.15831	Q9BQ70	transcription factor 25 [Source:HGNC Symbol;Acc:HGNC:29181]	protein_coding
POLR2L	-0.664928	13.2342	-3.11715	0.0149927	0.316773	-3.17716	P62875	RNA polymerase II, I and III subunit L [Source:HGNC Symbol;Acc:HGNC:9199]	protein_coding
UAP1	0.309203	16.4537	3.09163	0.0155703	0.32629	-3.21545	Q16222	UDP-N-acetylglucosamine pyrophosphorylase 1 [Source:HGNC Symbol;Acc:HGNC:12457]	protein_coding
METTL13	-0.731802	13.0829	-3.08908	0.0156292	0.32629	-3.21926	Q8N6R0	methyltransferase 13, eEF1A lysine and N-terminal methyltransferase [Source:HGNC Symbol;Acc:HGNC:24248]	protein_coding
YAE1	0.488105	11.2682	3.09171	0.0155684	0.32629	-3.21532	Q9NRH1	YAE1 maturation factor of ABCE1 [Source:HGNC Symbol;Acc:HGNC:24857]	protein_coding
COG3	-0.350251	12.412	-3.08077	0.015823	0.327735	-3.23173	Q96JB2	component of oligomeric golgi complex 3 [Source:HGNC Symbol;Acc:HGNC:18619]	protein_coding
JUNB	0.651985	12.975	3.05525	0.0164342	0.332408	-3.27007	P17275	JunB proto-oncogene, AP-1 transcription factor subunit [Source:HGNC Symbol;Acc:HGNC:6205]	protein_coding
MTIF2	-0.224452	14.2882	-3.06186	0.0162736	0.332408	-3.26014	P46199	mitochondrial translational initiation factor 2 [Source:HGNC Symbol;Acc:HGNC:7441]	protein_coding
EXT1	-0.506322	12.0703	-3.06756	0.0161365	0.332408	-3.25158	Q16394	exostosin glycosyltransferase 1 [Source:HGNC Symbol;Acc:HGNC:3512]	protein_coding
DDX54	-0.287933	15.0037	-3.04541	0.0166765	0.332408	-3.28487	Q8TDD1	DEAD-box helicase 54 [Source:HGNC Symbol;Acc:HGNC:20084]	protein_coding
TOR1AIP2	-0.797587	10.2981	-3.0499	0.0165655	0.332408	-3.27812	Q9H496	torsin 1A interacting protein 2 [Source:HGNC Symbol;Acc:HGNC:24055]	protein_coding
ACOT13	-0.411504	14.7784	-3.06042	0.0163084	0.332408	-3.2623	Q9NPJ3	acyl-CoA thioesterase 13 [Source:HGNC Symbol;Acc:HGNC:20999]	protein_coding
SRSF9	0.20924	18.4189	3.04084	0.0167901	0.333331	-3.29173	Q13242	serine and arginine rich splicing factor 9 [Source:HGNC Symbol;Acc:HGNC:10791]	protein_coding
MRPL16	-0.298286	14.7527	-3.01728	0.0173897	0.343937	-3.32719	Q9NX20	mitochondrial ribosomal protein L16 [Source:HGNC Symbol;Acc:HGNC:14476]	protein_coding
EFL1	0.272277	14.4923	3.01441	0.0174643	0.344119	-3.33151	Q7Z2Z2	elongation factor like GTPase 1 [Source:HGNC Symbol;Acc:HGNC:25789]	protein_coding
CENPU	0.675759	12.9011	3.011	0.0175534	0.344584	-3.33665	Q71F23	centromere protein U [Source:HGNC Symbol;Acc:HGNC:21348]	protein_coding
MAP4K5	-0.293697	13.2618	-2.9955	0.0179641	0.348742	-3.36	Q9Y4K4	mitogen-activated protein kinase kinase kinase kinase 5 [Source:HGNC Symbol;Acc:HGNC:6867]	protein_coding
ACADSB	-0.253838	14.8709	-2.98802	0.0181658	0.350145	-3.37127	P45954	acyl-CoA dehydrogenase short/branched chain [Source:HGNC Symbol;Acc:HGNC:91]	protein_coding
TPI1	0.292986	20.7575	2.98789	0.0181695	0.350145	-3.37147	P60174	triosephosphate isomerase 1 [Source:HGNC Symbol;Acc:HGNC:12009]	protein_coding
NDUFB4	-0.400332	16.111	-2.98394	0.0182769	0.350929	-3.37742	O95168	NADH:ubiquinone oxidoreductase subunit B4 [Source:HGNC Symbol;Acc:HGNC:7699]	protein_coding
ZNF185	0.318789	17.7212	2.96961	0.0186725	0.35394	-3.39903	O15231	zinc finger protein 185 with LIM domain [Source:HGNC Symbol;Acc:HGNC:12976]	protein_coding
RBIS	-0.370115	14.4167	-2.96854	0.0187024	0.35394	-3.40064	Q8N0T1	ribosomal biogenesis factor [Source:HGNC Symbol;Acc:HGNC:32235]	protein_coding
USP16	-0.62433	11.9368	-2.96853	0.0187028	0.35394	-3.40066	Q9Y5T5	ubiquitin specific peptidase 16 [Source:HGNC Symbol;Acc:HGNC:12614]	protein_coding
TMEM223	-0.247406	14.1151	-2.93887	0.0195519	0.362192	-3.44541	A0PJW6	transmembrane protein 223 [Source:HGNC Symbol;Acc:HGNC:28464]	protein_coding
ZNF593	-0.316834	15.7449	-2.94538	0.0193622	0.362192	-3.43559	O00488	zinc finger protein 593 [Source:HGNC Symbol;Acc:HGNC:30943]	protein_coding
PPM1G	0.203485	17.2759	2.94013	0.0195151	0.362192	-3.44351	O15355	protein phosphatase, Mg2+/Mn2+ dependent 1G [Source:HGNC Symbol;Acc:HGNC:9278]	protein_coding
DHFR	0.213215	15.9347	2.94553	0.0193579	0.362192	-3.43537	P00374	dihydrofolate reductase [Source:HGNC Symbol;Acc:HGNC:2861]	protein_coding
ALDOC	0.320087	17.04	2.94597	0.0193452	0.362192	-3.4347	P09972	aldolase, fructose-bisphosphate C [Source:HGNC Symbol;Acc:HGNC:418]	protein_coding
FEN1	0.185313	17.7863	2.9406	0.0195015	0.362192	-3.44281	P39748	flap structure-specific endonuclease 1 [Source:HGNC Symbol;Acc:HGNC:3650]	protein_coding
SRXN1	-0.780367	13.5663	-2.93332	0.0197155	0.363941	-3.45381	Q9BYN0	sulfiredoxin 1 [Source:HGNC Symbol;Acc:HGNC:16132]	protein_coding
RSL1D1	-0.238888	17.1303	-2.92095	0.0200845	0.366432	-3.47248	O76021	ribosomal L1 domain containing 1 [Source:HGNC Symbol;Acc:HGNC:24534]	protein_coding
ACO1	0.209192	16.996	2.90894	0.02045	0.366432	-3.49064	P21399	aconitase 1 [Source:HGNC Symbol;Acc:HGNC:117]	protein_coding
IDH2	0.204808	15.1302	2.9124	0.020344	0.366432	-3.48541	P48735	isocitrate dehydrogenase (NADP(+)) 2 [Source:HGNC Symbol;Acc:HGNC:5383]	protein_coding
CCDC97	-0.610266	12.1772	-2.91321	0.0203191	0.366432	-3.48417	Q96F63	coiled-coil domain containing 97 [Source:HGNC Symbol;Acc:HGNC:28289]	protein_coding
TONSL	0.240032	13.3964	2.90805	0.0204773	0.366432	-3.49198	Q96HA7	tonsoku like, DNA repair protein [Source:HGNC Symbol;Acc:HGNC:7801]	protein_coding
DHX36	-0.304778	14.2192	-2.9251	0.0199598	0.366432	-3.46621	Q9H2U1	DEAH-box helicase 36 [Source:HGNC Symbol;Acc:HGNC:14410]	protein_coding
DCAF16	0.245028	14.6385	2.91889	0.0201466	0.366432	-3.47559	Q9NXF7	DDB1 and CUL4 associated factor 16 [Source:HGNC Symbol;Acc:HGNC:25987]	protein_coding
SMARCAL1	-0.707517	11.557	-2.92069	0.0200925	0.366432	-3.47288	Q9NZC9	SWI/SNF related, matrix associated, actin dependent regulator of chromatin, subfamily a like 1 [Source:HGNC Symbol;Acc:HGNC:11102]	protein_coding
RRM1	0.406971	15.4117	2.90143	0.0206818	0.368837	-3.50198	P23921	ribonucleotide reductase catalytic subunit M1 [Source:HGNC Symbol;Acc:HGNC:10451]	protein_coding
MRPS12	-0.207026	14.3624	-2.89604	0.0208502	0.369024	-3.51013	O15235	mitochondrial ribosomal protein S12 [Source:HGNC Symbol;Acc:HGNC:10380]	protein_coding
HNRNPR	-0.170085	18.6872	-2.88329	0.0212534	0.369024	-3.5294	O43390	heterogeneous nuclear ribonucleoprotein R [Source:HGNC Symbol;Acc:HGNC:5047]	protein_coding
PRC1	0.355424	13.9373	2.88603	0.0211661	0.369024	-3.52526	O43663	protein regulator of cytokinesis 1 [Source:HGNC Symbol;Acc:HGNC:9341]	protein_coding
GNAI1	0.337871	13.3957	2.88337	0.0212509	0.369024	-3.52928	P63096	G protein subunit alpha i1 [Source:HGNC Symbol;Acc:HGNC:4384]	protein_coding
SDE2	-0.449933	13.5992	-2.88734	0.0211243	0.369024	-3.52328	Q6IQ49	SDE2 telomere maintenance homolog [Source:HGNC Symbol;Acc:HGNC:26643]	protein_coding
BAD	-0.231426	15.4627	-2.89041	0.0210273	0.369024	-3.51864	Q92934	BCL2 associated agonist of cell death [Source:HGNC Symbol;Acc:HGNC:936]	protein_coding
NACC1	-0.368334	13.5661	-2.88778	0.0211105	0.369024	-3.52262	Q96RE7	nucleus accumbens associated 1 [Source:HGNC Symbol;Acc:HGNC:20967]	protein_coding
MRPL9	-0.183679	15.0345	-2.891	0.0210085	0.369024	-3.51775	Q9BYD2	mitochondrial ribosomal protein L9 [Source:HGNC Symbol;Acc:HGNC:14277]	protein_coding
ACAD9	-0.275182	14.0141	-2.87471	0.0215295	0.372589	-3.54238	Q9H845	acyl-CoA dehydrogenase family member 9 [Source:HGNC Symbol;Acc:HGNC:21497]	protein_coding
EPHA2	-0.286651	16.5779	-2.86469	0.0218568	0.37341	-3.55754	P29317	EPH receptor A2 [Source:HGNC Symbol;Acc:HGNC:3386]	protein_coding
PLS1	-0.287907	15.0905	-2.86624	0.021806	0.37341	-3.5552	Q14651	plastin 1 [Source:HGNC Symbol;Acc:HGNC:9090]	protein_coding
ARID2	-0.445324	11.891	-2.86456	0.0218609	0.37341	-3.55773	Q68CP9	AT-rich interaction domain 2 [Source:HGNC Symbol;Acc:HGNC:18037]	protein_coding
PPP1R13L	0.332647	16.2034	2.86556	0.0218283	0.37341	-3.55623	Q8WUF5	protein phosphatase 1 regulatory subunit 13 like [Source:HGNC Symbol;Acc:HGNC:18838]	protein_coding
POLD3	-0.627017	14.1456	-2.85844	0.0220635	0.374438	-3.567	Q15054	DNA polymerase delta 3, accessory subunit [Source:HGNC Symbol;Acc:HGNC:20932]	protein_coding
SNAP29	0.219319	15.4069	2.854	0.0222116	0.37574	-3.57372	O95721	synaptosome associated protein 29 [Source:HGNC Symbol;Acc:HGNC:11133]	protein_coding
RNF113A	0.396955	13.4598	2.84948	0.0223633	0.37704	-3.58055	O15541	ring finger protein 113A [Source:HGNC Symbol;Acc:HGNC:12974]	protein_coding
WDHD1	0.222002	15.3204	2.84745	0.0224318	0.37704	-3.58362	O75717	WD repeat and HMG-box DNA binding protein 1 [Source:HGNC Symbol;Acc:HGNC:23170]	protein_coding
PDIA6	0.216368	18.9867	2.84196	0.0226182	0.378964	-3.59194	Q15084	protein disulfide isomerase family A member 6 [Source:HGNC Symbol;Acc:HGNC:30168]	protein_coding
MT-CO2	-0.322419	17.7273	-2.83003	0.023029	0.383404	-3.61	P00403	mitochondrially encoded cytochrome c oxidase II [Source:HGNC Symbol;Acc:HGNC:7421]	protein_coding
CHID1	-0.40186	13.0458	-2.82467	0.0232159	0.385296	-3.61811	Q9BWS9	chitinase domain containing 1 [Source:HGNC Symbol;Acc:HGNC:28474]	protein_coding
NOL6	-0.218772	15.0142	-2.82043	0.023365	0.386551	-3.62453	Q9H6R4	nucleolar protein 6 [Source:HGNC Symbol;Acc:HGNC:19910]	protein_coding
WDR46	-0.245413	14.9082	-2.81207	0.0236619	0.389244	-3.6372	O15213	WD repeat domain 46 [Source:HGNC Symbol;Acc:HGNC:13923]	protein_coding
LSS	-0.197017	15.2741	-2.80431	0.0239411	0.392381	-3.64896	P48449	lanosterol synthase [Source:HGNC Symbol;Acc:HGNC:6708]	protein_coding
RIPK2	-1.74649	12.4255	-2.79909	0.0241305	0.393045	-3.65686	O43353	receptor interacting serine/threonine kinase 2 [Source:HGNC Symbol;Acc:HGNC:10020]	protein_coding
PAK4	-0.239672	14.0837	-2.79703	0.0242058	0.393045	-3.65998	O96013	p21 (RAC1) activated kinase 4 [Source:HGNC Symbol;Acc:HGNC:16059]	protein_coding
FASN	-0.386524	18.9094	-2.79839	0.0241561	0.393045	-3.65792	P49327	fatty acid synthase [Source:HGNC Symbol;Acc:HGNC:3594]	protein_coding
DHX37	-0.244403	12.9638	-2.78197	0.0247636	0.400476	-3.6828	Q8IY37	DEAH-box helicase 37 [Source:HGNC Symbol;Acc:HGNC:17210]	protein_coding
GPD1L	-0.501386	12.6059	-2.77873	0.0248852	0.400476	-3.68771	Q8N335	glycerol-3-phosphate dehydrogenase 1 like [Source:HGNC Symbol;Acc:HGNC:28956]	protein_coding
XPNPEP1	0.203701	15.7016	2.77855	0.0248918	0.400476	-3.68797	Q9NQW7	X-prolyl aminopeptidase 1 [Source:HGNC Symbol;Acc:HGNC:12822]	protein_coding
SPATS2	0.458779	12.551	2.77215	0.0251344	0.403147	-3.69769	Q86XZ4	spermatogenesis associated serine rich 2 [Source:HGNC Symbol;Acc:HGNC:18650]	protein_coding
UTP6	-0.208185	14.8488	-2.76964	0.0252298	0.403446	-3.70148	Q9NYH9	UTP6 small subunit processome component [Source:HGNC Symbol;Acc:HGNC:18279]	protein_coding
HAT1	0.1882	16.1969	2.73566	0.026563	0.40476	-3.75299	O14929	histone acetyltransferase 1 [Source:HGNC Symbol;Acc:HGNC:4821]	protein_coding
PIK3CB	-0.953374	11.7566	-2.74129	0.026337	0.40476	-3.74445	P42338	phosphatidylinositol-4,5-bisphosphate 3-kinase catalytic subunit beta [Source:HGNC Symbol;Acc:HGNC:8976]	protein_coding
ABCE1	-0.174165	16.9698	-2.75668	0.0257299	0.40476	-3.72112	P61221	ATP binding cassette subfamily E member 1 [Source:HGNC Symbol;Acc:HGNC:69]	protein_coding
JAG1	-0.767287	11.1472	-2.7546	0.0258113	0.40476	-3.72428	P78504	jagged canonical Notch ligand 1 [Source:HGNC Symbol;Acc:HGNC:6188]	protein_coding
CDK6	0.462516	13.5806	2.73686	0.0265148	0.40476	-3.75117	Q00534	cyclin dependent kinase 6 [Source:HGNC Symbol;Acc:HGNC:1777]	protein_coding
FADD	-0.570438	13.5689	-2.76099	0.0255627	0.40476	-3.7146	Q13158	Fas associated via death domain [Source:HGNC Symbol;Acc:HGNC:3573]	protein_coding
DDX10	-0.221507	13.9669	-2.7635	0.0254655	0.40476	-3.71079	Q13206	DEAD-box helicase 10 [Source:HGNC Symbol;Acc:HGNC:2735]	protein_coding
ORMDL2	0.383252	14.5933	2.73235	0.0266968	0.40476	-3.75801	Q53FV1	ORMDL sphingolipid biosynthesis regulator 2 [Source:HGNC Symbol;Acc:HGNC:16037]	protein_coding
GRAMD2B	0.421771	12.3454	2.73407	0.026627	0.40476	-3.75539	Q96HH9	GRAM domain containing 2B [Source:HGNC Symbol;Acc:HGNC:24911]	protein_coding
NOB1	-0.427726	14.0097	-2.74521	0.026181	0.40476	-3.73851	Q9ULX3	NIN1 (RPN12) binding protein 1 homolog [Source:HGNC Symbol;Acc:HGNC:29540]	protein_coding
DHRS7	-0.679863	13.2105	-2.74605	0.0261477	0.40476	-3.73723	Q9Y394	dehydrogenase/reductase 7 [Source:HGNC Symbol;Acc:HGNC:21524]	protein_coding
SAR1B	-0.237544	14.1582	-2.74009	0.0263851	0.40476	-3.74627	Q9Y6B6	secretion associated Ras related GTPase 1B [Source:HGNC Symbol;Acc:HGNC:10535]	protein_coding
NSA2	-0.386728	16.6966	-2.71866	0.0272569	0.406229	-3.77876	O95478	NSA2 ribosome biogenesis factor [Source:HGNC Symbol;Acc:HGNC:30728]	protein_coding
SLC1A4	0.496947	13.1959	2.72705	0.0269121	0.406229	-3.76604	P43007	solute carrier family 1 member 4 [Source:HGNC Symbol;Acc:HGNC:10942]	protein_coding
REEP3	0.237889	14.1216	2.72054	0.0271794	0.406229	-3.77591	Q6NUK4	receptor accessory protein 3 [Source:HGNC Symbol;Acc:HGNC:23711]	protein_coding
STAU1	0.174331	16.6654	2.71244	0.0275157	0.408696	-3.78819	O95793	staufen double-stranded RNA binding protein 1 [Source:HGNC Symbol;Acc:HGNC:11370]	protein_coding
SPR	0.147778	16.1615	2.71095	0.0275779	0.408696	-3.79044	P35270	sepiapterin reductase [Source:HGNC Symbol;Acc:HGNC:11257]	protein_coding
PHF2	0.772666	13.8484	2.68228	0.0288062	0.411675	-3.83393	O75151	PHD finger protein 2 [Source:HGNC Symbol;Acc:HGNC:8920]	protein_coding
ASNS	0.191814	16.5595	2.67995	0.0289083	0.411675	-3.83745	P08243	asparagine synthetase (glutamine-hydrolyzing) [Source:HGNC Symbol;Acc:HGNC:753]	protein_coding
SP100	0.183964	14.8526	2.69004	0.028468	0.411675	-3.82215	P23497	SP100 nuclear antigen [Source:HGNC Symbol;Acc:HGNC:11206]	protein_coding
QARS1	-0.175307	17.6689	-2.69636	0.0281961	0.411675	-3.81257	P47897	glutaminyl-tRNA synthetase 1 [Source:HGNC Symbol;Acc:HGNC:9751]	protein_coding
DR1	0.243823	15.3337	2.67894	0.0289526	0.411675	-3.83898	Q01658	down-regulator of transcription 1 [Source:HGNC Symbol;Acc:HGNC:3017]	protein_coding
NEXN	-0.347206	13.4372	-2.68723	0.0285901	0.411675	-3.82642	Q0ZGT2	nexilin F-actin binding protein [Source:HGNC Symbol;Acc:HGNC:29557]	protein_coding
UBAP2	0.271893	15.4707	2.68032	0.0288918	0.411675	-3.83688	Q5T6F2	ubiquitin associated protein 2 [Source:HGNC Symbol;Acc:HGNC:14185]	protein_coding
NSUN5	-0.281012	13.0449	-2.6894	0.0284958	0.411675	-3.82312	Q96P11	NOP2/Sun RNA methyltransferase 5 [Source:HGNC Symbol;Acc:HGNC:16385]	protein_coding
LSM14B	0.312525	15.3606	2.69911	0.0280782	0.411675	-3.80839	Q9BX40	LSM family member 14B [Source:HGNC Symbol;Acc:HGNC:15887]	protein_coding
GTPBP4	-0.245701	17.348	-2.68061	0.0288792	0.411675	-3.83645	Q9BZE4	GTP binding protein 4 [Source:HGNC Symbol;Acc:HGNC:21535]	protein_coding
USP24	-0.511527	12.9492	-2.67953	0.0289268	0.411675	-3.83809	Q9UPU5	ubiquitin specific peptidase 24 [Source:HGNC Symbol;Acc:HGNC:12623]	protein_coding
CSTF1	-0.188248	15.464	-2.66955	0.0293691	0.412036	-3.85322	Q05048	cleavage stimulation factor subunit 1 [Source:HGNC Symbol;Acc:HGNC:2483]	protein_coding
VPS13C	-0.63451	11.4866	-2.67124	0.0292936	0.412036	-3.85065	Q709C8	vacuolar protein sorting 13 homolog C [Source:HGNC Symbol;Acc:HGNC:23594]	protein_coding
H2BC1	-0.509483	14.5326	-2.66954	0.0293696	0.412036	-3.85323	Q96A08	H2B clustered histone 1 [Source:HGNC Symbol;Acc:HGNC:18730]	protein_coding
TTC17	-0.400604	11.6368	-2.67308	0.0292118	0.412036	-3.84786	Q96AE7	tetratricopeptide repeat domain 17 [Source:HGNC Symbol;Acc:HGNC:25596]	protein_coding
GNL2	-0.269202	15.6463	-2.66086	0.0297602	0.414457	-3.8664	Q13823	G protein nucleolar 2 [Source:HGNC Symbol;Acc:HGNC:29925]	protein_coding
PAWR	-0.176245	16.2631	-2.66271	0.0296766	0.414457	-3.86359	Q96IZ0	pro-apoptotic WT1 regulator [Source:HGNC Symbol;Acc:HGNC:8614]	protein_coding
LYRM7	-0.851174	13.11	-2.65718	0.0299271	0.415126	-3.87197	Q5U5X0	LYR motif containing 7 [Source:HGNC Symbol;Acc:HGNC:28072]	protein_coding
OSTF1	0.604453	14.9963	2.64879	0.030312	0.417465	-3.88469	Q92882	osteoclast stimulating factor 1 [Source:HGNC Symbol;Acc:HGNC:8510]	protein_coding
C11orf98	-0.276478	16.1725	-2.63748	0.0308387	0.41805	-3.90184	E9PRG8	chromosome 11 open reading frame 98 [Source:HGNC Symbol;Acc:HGNC:51238]	protein_coding
RPA3	0.465179	16.4563	2.63786	0.0308208	0.41805	-3.90126	P35244	replication protein A3 [Source:HGNC Symbol;Acc:HGNC:10291]	protein_coding
TPD52	0.291982	15.8238	2.6344	0.0309838	0.41805	-3.90651	P55327	tumor protein D52 [Source:HGNC Symbol;Acc:HGNC:12005]	protein_coding
MASTL	0.570009	12.3401	2.63752	0.0308368	0.41805	-3.90178	Q96GX5	microtubule associated serine/threonine kinase like [Source:HGNC Symbol;Acc:HGNC:19042]	protein_coding
TACSTD2	-0.443305	14.9298	-2.63008	0.0311882	0.419645	-3.91305	P09758	tumor associated calcium signal transducer 2 [Source:HGNC Symbol;Acc:HGNC:11530]	protein_coding
FUCA1	-0.396948	12.9932	-2.62817	0.0312795	0.419799	-3.91596	P04066	alpha-L-fucosidase 1 [Source:HGNC Symbol;Acc:HGNC:4006]	protein_coding
RABIF	0.200601	16.5583	2.62021	0.031661	0.421693	-3.92801	P47224	RAB interacting factor [Source:HGNC Symbol;Acc:HGNC:9797]	protein_coding
ARFIP1	-0.154922	15.2957	-2.60639	0.0323358	0.422131	-3.94897	P53367	ADP ribosylation factor interacting protein 1 [Source:HGNC Symbol;Acc:HGNC:21496]	protein_coding
CAMSAP1	0.330477	12.9641	2.60797	0.0322578	0.422131	-3.94657	Q5T5Y3	calmodulin regulated spectrin associated protein 1 [Source:HGNC Symbol;Acc:HGNC:19946]	protein_coding
NDUFA11	-1.41873	10.9573	-2.6105	0.0321337	0.422131	-3.94274	Q86Y39	NADH:ubiquinone oxidoreductase subunit A11 [Source:HGNC Symbol;Acc:HGNC:20371]	protein_coding
HDHD5	0.16976	14.7605	2.61015	0.0321505	0.422131	-3.94326	Q9BXW7	haloacid dehalogenase like hydrolase domain containing 5 [Source:HGNC Symbol;Acc:HGNC:1843]	protein_coding
XPO4	-0.377132	13.5181	-2.61404	0.0319603	0.422131	-3.93736	Q9C0E2	exportin 4 [Source:HGNC Symbol;Acc:HGNC:17796]	protein_coding
GPATCH8	-0.293915	12.9624	-2.60953	0.0321811	0.422131	-3.9442	Q9UKJ3	G-patch domain containing 8 [Source:HGNC Symbol;Acc:HGNC:29066]	protein_coding
NDUFA7	-1.33012	12.8497	-2.58351	0.0334849	0.422592	-3.98364	O95182	NADH:ubiquinone oxidoreductase subunit A7 [Source:HGNC Symbol;Acc:HGNC:7691]	protein_coding
ATP1B1	-0.230215	17.9117	-2.5947	0.0329178	0.422592	-3.96668	P05026	ATPase Na+/K+ transporting subunit beta 1 [Source:HGNC Symbol;Acc:HGNC:804]	protein_coding
ITGA5	0.25443	15.4163	2.58111	0.0336074	0.422592	-3.98726	P08648	integrin subunit alpha 5 [Source:HGNC Symbol;Acc:HGNC:6141]	protein_coding
ATP5PB	-0.441575	16.512	-2.58604	0.0333555	0.422592	-3.9798	P24539	ATP synthase peripheral stalk-membrane subunit b [Source:HGNC Symbol;Acc:HGNC:840]	protein_coding
GCLM	-0.315921	15.8392	-2.60213	0.0325465	0.422592	-3.95542	P48507	glutamate-cysteine ligase modifier subunit [Source:HGNC Symbol;Acc:HGNC:4312]	protein_coding
FRG1	-0.213511	14.9225	-2.59009	0.03315	0.422592	-3.97366	Q14331	FSHD region gene 1 [Source:HGNC Symbol;Acc:HGNC:3954]	protein_coding
COA6	-0.52072	13.5828	-2.57632	0.0338542	0.422592	-3.99452	Q5JTJ3	cytochrome c oxidase assembly factor 6 [Source:HGNC Symbol;Acc:HGNC:18025]	protein_coding
WDSUB1	-0.658964	12.0021	-2.57703	0.0338177	0.422592	-3.99345	Q8N9V3	WD repeat, sterile alpha motif and U-box domain containing 1 [Source:HGNC Symbol;Acc:HGNC:26697]	protein_coding
HAUS1	0.342178	14.1908	2.58316	0.0335026	0.422592	-3.98416	Q96CS2	HAUS augmin like complex subunit 1 [Source:HGNC Symbol;Acc:HGNC:25174]	protein_coding
TOE1	-0.212441	14.2013	-2.58806	0.0332526	0.422592	-3.97673	Q96GM8	target of EGR1, exonuclease [Source:HGNC Symbol;Acc:HGNC:15954]	protein_coding
DHTKD1	-0.275012	13.1429	-2.59503	0.0329012	0.422592	-3.96618	Q96HY7	dehydrogenase E1 and transketolase domain containing 1 [Source:HGNC Symbol;Acc:HGNC:23537]	protein_coding
PAIP1	-0.311465	13.4942	-2.57549	0.0338973	0.422592	-3.99578	Q9H074	poly(A) binding protein interacting protein 1 [Source:HGNC Symbol;Acc:HGNC:16945]	protein_coding
CCDC86	-0.238586	15.5321	-2.59408	0.0329485	0.422592	-3.96761	Q9H6F5	coiled-coil domain containing 86 [Source:HGNC Symbol;Acc:HGNC:28359]	protein_coding
ATP6V1A	-0.168435	17.2127	-2.57343	0.0340038	0.422918	-3.99889	P38606	ATPase H+ transporting V1 subunit A [Source:HGNC Symbol;Acc:HGNC:851]	protein_coding
ALPP	-0.538236	12.1723	-2.56824	0.0342747	0.423399	-4.00676	P05187	alkaline phosphatase, placental [Source:HGNC Symbol;Acc:HGNC:439]	protein_coding
PHC3	-1.08574	11.8661	-2.56653	0.0343645	0.423399	-4.00935	Q8NDX5	polyhomeotic homolog 3 [Source:HGNC Symbol;Acc:HGNC:15682]	protein_coding
IDH1	-0.358944	16.3946	-2.54795	0.0353541	0.427778	-4.03748	O75874	isocitrate dehydrogenase (NADP(+)) 1 [Source:HGNC Symbol;Acc:HGNC:5382]	protein_coding
TTC4	-0.350038	13.7057	-2.55073	0.0352041	0.427778	-4.03327	O95801	tetratricopeptide repeat domain 4 [Source:HGNC Symbol;Acc:HGNC:12394]	protein_coding
TUBA4A	0.245319	16.5454	2.54693	0.0354093	0.427778	-4.03903	P68366	tubulin alpha 4a [Source:HGNC Symbol;Acc:HGNC:12407]	protein_coding
STK4	0.254093	14.3009	2.5471	0.0354002	0.427778	-4.03877	Q13043	serine/threonine kinase 4 [Source:HGNC Symbol;Acc:HGNC:11408]	protein_coding
PDIA5	0.393656	13.4987	2.54607	0.0354557	0.427778	-4.04033	Q14554	protein disulfide isomerase family A member 5 [Source:HGNC Symbol;Acc:HGNC:24811]	protein_coding
CDCA8	0.266869	17.977	2.55244	0.0351125	0.427778	-4.03069	Q53HL2	cell division cycle associated 8 [Source:HGNC Symbol;Acc:HGNC:14629]	protein_coding
FDX2	-0.496163	14.2561	-2.54465	0.035533	0.427778	-4.04248	Q6P4F2	ferredoxin 2 [Source:HGNC Symbol;Acc:HGNC:30546]	protein_coding
PARP4	-0.187432	13.5965	-2.5505	0.0352167	0.427778	-4.03362	Q9UKK3	poly(ADP-ribose) polymerase family member 4 [Source:HGNC Symbol;Acc:HGNC:271]	protein_coding
GSPT1	-0.321499	16.1472	-2.53671	0.0359671	0.430787	-4.0545	P15170	G1 to S phase transition 1 [Source:HGNC Symbol;Acc:HGNC:4621]	protein_coding
MRPL10	-0.32796	13.9312	-2.53559	0.0360286	0.430787	-4.05619	Q7Z7H8	mitochondrial ribosomal protein L10 [Source:HGNC Symbol;Acc:HGNC:14055]	protein_coding
ITGA2	-0.210097	17.1737	-2.52459	0.0366401	0.435132	-4.07284	P17301	integrin subunit alpha 2 [Source:HGNC Symbol;Acc:HGNC:6137]	protein_coding
CDC34	0.93928	14.73	2.52563	0.0365819	0.435132	-4.07127	P49427	cell division cycle 34, ubiqiutin conjugating enzyme [Source:HGNC Symbol;Acc:HGNC:1734]	protein_coding
FKBP8	0.234469	16.9928	2.50406	0.037809	0.438784	-4.10388	Q14318	FKBP prolyl isomerase 8 [Source:HGNC Symbol;Acc:HGNC:3724]	protein_coding
POGLUT2	-0.991334	11.0918	-2.50436	0.0377917	0.438784	-4.10343	Q6UW63	protein O-glucosyltransferase 2 [Source:HGNC Symbol;Acc:HGNC:19350]	protein_coding
CD109	1.05072	13.5629	2.50226	0.0379136	0.438784	-4.10661	Q6YHK3	CD109 molecule [Source:HGNC Symbol;Acc:HGNC:21685]	protein_coding
POLR3F	-0.389444	13.6794	-2.50023	0.0380318	0.438784	-4.10969	Q9H1D9	RNA polymerase III subunit F [Source:HGNC Symbol;Acc:HGNC:15763]	protein_coding
ARHGAP35	-0.280585	12.469	-2.51325	0.0372811	0.438784	-4.08999	Q9NRY4	Rho GTPase activating protein 35 [Source:HGNC Symbol;Acc:HGNC:4591]	protein_coding
ABCF2	-0.201705	16.801	-2.50543	0.0377302	0.438784	-4.10182	Q9UG63	ATP binding cassette subfamily F member 2 [Source:HGNC Symbol;Acc:HGNC:71]	protein_coding
SUN2	-0.379097	15.6101	-2.50952	0.0374948	0.438784	-4.09564	Q9UH99	Sad1 and UNC84 domain containing 2 [Source:HGNC Symbol;Acc:HGNC:14210]	protein_coding
AGPS	-0.174778	16.4754	-2.49809	0.0381563	0.438987	-4.11291	O00116	alkylglycerone phosphate synthase [Source:HGNC Symbol;Acc:HGNC:327]	protein_coding
TIMM23	-0.21857	14.885	-2.48808	0.0387457	0.439312	-4.12804	O14925	translocase of inner mitochondrial membrane 23 [Source:HGNC Symbol;Acc:HGNC:17312]	protein_coding
PRPF38B	-0.199063	14.052	-2.49041	0.0386076	0.439312	-4.12452	Q5VTL8	pre-mRNA processing factor 38B [Source:HGNC Symbol;Acc:HGNC:25512]	protein_coding
TRNT1	-0.296196	12.7474	-2.49157	0.038539	0.439312	-4.12277	Q96Q11	tRNA nucleotidyl transferase 1 [Source:HGNC Symbol;Acc:HGNC:17341]	protein_coding
EYA3	-0.645677	10.209	-2.48903	0.0386893	0.439312	-4.12661	Q99504	EYA transcriptional coactivator and phosphatase 3 [Source:HGNC Symbol;Acc:HGNC:3521]	protein_coding
MRPS2	-0.194872	15.1253	-2.4826	0.0390721	0.441112	-4.13632	Q9Y399	mitochondrial ribosomal protein S2 [Source:HGNC Symbol;Acc:HGNC:14495]	protein_coding
GATAD2A	0.18543	15.4733	2.47982	0.0392391	0.442048	-4.14053	Q86YP4	GATA zinc finger domain containing 2A [Source:HGNC Symbol;Acc:HGNC:29989]	protein_coding
SAP18	-0.484147	14.5373	-2.47634	0.0394485	0.442964	-4.14578	O00422	Sin3A associated protein 18 [Source:HGNC Symbol;Acc:HGNC:10530]	protein_coding
MRPL40	-0.989283	11.8767	-2.47361	0.0396138	0.442964	-4.1499	Q9NQ50	mitochondrial ribosomal protein L40 [Source:HGNC Symbol;Acc:HGNC:14491]	protein_coding
NCKIPSD	0.304965	12.8614	2.4729	0.0396571	0.442964	-4.15098	Q9NZQ3	NCK interacting protein with SH3 domain [Source:HGNC Symbol;Acc:HGNC:15486]	protein_coding
PGAM1	0.342355	20.5318	2.45716	0.0406253	0.44828	-4.17475	P18669	phosphoglycerate mutase 1 [Source:HGNC Symbol;Acc:HGNC:8888]	protein_coding
ANAPC7	-0.200031	17.4468	-2.45686	0.0406442	0.44828	-4.17521	Q9UJX3	anaphase promoting complex subunit 7 [Source:HGNC Symbol;Acc:HGNC:17380]	protein_coding
IRS2	0.434216	13.9288	2.45908	0.0405058	0.44828	-4.17185	Q9Y4H2	insulin receptor substrate 2 [Source:HGNC Symbol;Acc:HGNC:6126]	protein_coding
COLGALT1	0.199059	17.9592	2.44975	0.0410894	0.45068	-4.18594	Q8NBJ5	collagen beta(1-O)galactosyltransferase 1 [Source:HGNC Symbol;Acc:HGNC:26182]	protein_coding
PPP4R2	0.265942	15.2169	2.44792	0.0412045	0.45068	-4.18869	Q9NY27	protein phosphatase 4 regulatory subunit 2 [Source:HGNC Symbol;Acc:HGNC:18296]	protein_coding
TAOK3	-0.159293	13.9559	-2.44166	0.0416022	0.451276	-4.19815	Q9H2K8	TAO kinase 3 [Source:HGNC Symbol;Acc:HGNC:18133]	protein_coding
CDC23	-0.227427	13.3293	-2.44262	0.0415406	0.451276	-4.19669	Q9UJX2	cell division cycle 23 [Source:HGNC Symbol;Acc:HGNC:1724]	protein_coding
VAPB	0.193669	16.7341	2.42767	0.0425039	0.452695	-4.21924	O95292	VAMP associated protein B and C [Source:HGNC Symbol;Acc:HGNC:12649]	protein_coding
MBD3	0.179834	15.511	2.43534	0.0420074	0.452695	-4.20769	O95983	methyl-CpG binding domain protein 3 [Source:HGNC Symbol;Acc:HGNC:6918]	protein_coding
APOB	-0.317801	16.1341	-2.43223	0.0422077	0.452695	-4.21236	P04114	apolipoprotein B [Source:HGNC Symbol;Acc:HGNC:603]	protein_coding
CD74	-0.270746	15.0945	-2.43145	0.0422585	0.452695	-4.21355	P04233	CD74 molecule [Source:HGNC Symbol;Acc:HGNC:1697]	protein_coding
ETS1	0.792243	12.8452	2.42407	0.0427394	0.452695	-4.22467	P14921	ETS proto-oncogene 1, transcription factor [Source:HGNC Symbol;Acc:HGNC:3488]	protein_coding
ERP29	0.180839	19.9753	2.42206	0.0428715	0.452695	-4.22771	P30040	endoplasmic reticulum protein 29 [Source:HGNC Symbol;Acc:HGNC:13799]	protein_coding
TAGLN2	0.159745	19.2906	2.41934	0.0430509	0.452695	-4.23181	P37802	transgelin 2 [Source:HGNC Symbol;Acc:HGNC:11554]	protein_coding
COIL	0.165525	14.0006	2.41861	0.0430989	0.452695	-4.23291	P38432	coilin [Source:HGNC Symbol;Acc:HGNC:2184]	protein_coding
ADGRE5	-0.245942	20.2393	-2.42515	0.0426689	0.452695	-4.22305	P48960	adhesion G protein-coupled receptor E5 [Source:HGNC Symbol;Acc:HGNC:1711]	protein_coding
EIF5	-0.155054	17.3228	-2.41979	0.0430208	0.452695	-4.23112	P55010	eukaryotic translation initiation factor 5 [Source:HGNC Symbol;Acc:HGNC:3299]	protein_coding
PFKP	0.16609	18.6279	2.43698	0.0419016	0.452695	-4.20521	Q01813	phosphofructokinase, platelet [Source:HGNC Symbol;Acc:HGNC:8878]	protein_coding
TSNAX	-0.189408	14.6297	-2.417	0.0432055	0.452797	-4.23533	Q99598	translin associated factor X [Source:HGNC Symbol;Acc:HGNC:12380]	protein_coding
GSR	-0.156361	15.3156	-2.4104	0.0436449	0.454117	-4.24527	P00390	glutathione-disulfide reductase [Source:HGNC Symbol;Acc:HGNC:4623]	protein_coding
PRR11	0.246164	13.9004	2.40993	0.0436767	0.454117	-4.24599	Q96HE9	proline rich 11 [Source:HGNC Symbol;Acc:HGNC:25619]	protein_coding
GPATCH1	-0.508597	11.6326	-2.40862	0.0437642	0.454129	-4.24795	Q9BRR8	G-patch domain containing 1 [Source:HGNC Symbol;Acc:HGNC:24658]	protein_coding
PPP1R14B	0.507771	17.5805	2.40686	0.043883	0.454466	-4.25062	Q96C90	protein phosphatase 1 regulatory inhibitor subunit 14B [Source:HGNC Symbol;Acc:HGNC:9057]	protein_coding
MAP7D3	-0.224561	14.877	-2.3946	0.0447161	0.460374	-4.26907	Q8IWC1	MAP7 domain containing 3 [Source:HGNC Symbol;Acc:HGNC:25742]	protein_coding
NASP	0.15653	17.5943	2.38433	0.0454262	0.464577	-4.28453	P49321	nuclear autoantigenic sperm protein [Source:HGNC Symbol;Acc:HGNC:7644]	protein_coding
PPP2R1B	-0.146264	13.8863	-2.37088	0.0463737	0.468632	-4.30476	P30154	protein phosphatase 2 scaffold subunit Abeta [Source:HGNC Symbol;Acc:HGNC:9303]	protein_coding
IDI1	-0.382956	14.3884	-2.37534	0.0460573	0.468632	-4.29805	Q13907	isopentenyl-diphosphate delta isomerase 1 [Source:HGNC Symbol;Acc:HGNC:5387]	protein_coding
ITGB4	0.284131	17.2456	2.36732	0.0466282	0.469294	-4.31012	P16144	integrin subunit beta 4 [Source:HGNC Symbol;Acc:HGNC:6158]	protein_coding
GYS1	0.425236	14.2714	2.35959	0.0471847	0.470863	-4.32173	P13807	glycogen synthase 1 [Source:HGNC Symbol;Acc:HGNC:4706]	protein_coding
CISD1	-0.883446	12.9624	-2.3586	0.0472564	0.470863	-4.32322	Q9NZ45	CDGSH iron sulfur domain 1 [Source:HGNC Symbol;Acc:HGNC:30880]	protein_coding
VAMP4	-0.728658	11.5739	-2.35158	0.0477689	0.474174	-4.33377	O75379	vesicle associated membrane protein 4 [Source:HGNC Symbol;Acc:HGNC:12645]	protein_coding
DGUOK	-0.888462	11.4391	-2.33689	0.0488583	0.476889	-4.35582	Q16854	deoxyguanosine kinase [Source:HGNC Symbol;Acc:HGNC:2858]	protein_coding
LRCH3	-0.345316	12.3988	-2.33817	0.0487623	0.476889	-4.3539	Q96II8	leucine rich repeats and calponin homology domain containing 3 [Source:HGNC Symbol;Acc:HGNC:28637]	protein_coding
BAZ1A	-0.471449	11.9942	-2.33893	0.0487056	0.476889	-4.35276	Q9NRL2	bromodomain adjacent to zinc finger domain 1A [Source:HGNC Symbol;Acc:HGNC:960]	protein_coding
RAB22A	-0.24933	14.6412	-2.33751	0.0488121	0.476889	-4.35489	Q9UL26	RAB22A, member RAS oncogene family [Source:HGNC Symbol;Acc:HGNC:9764]	protein_coding
H1-0	-0.501813	14.4355	-2.33565	0.0489517	0.476917	-4.35769	P07305	H1.0 linker histone [Source:HGNC Symbol;Acc:HGNC:4714]	protein_coding
TOP2B	-0.224921	15.1818	-2.32807	0.0495243	0.480715	-4.36905	Q02880	DNA topoisomerase II beta [Source:HGNC Symbol;Acc:HGNC:11990]	protein_coding
