# Supplementary material for: Novel Iron Chelator SK4 Drives Cytotoxicity through Inhibiting Mitochondrial Metabolism in Ovarian and Triple Negative Breast Cancer Cell Lines
Source: Biomedicines. 2023 Jul 24;11(7):2073. doi: 10.3390/biomedicines11072073 (PMC10377004; doi:10.3390/biomedicines11072073)
Supplement: Supplementary file 1 [file biomedicines-11-02073-s001.zip › Table S2.xlsx]

## Sheet: in
	logFC	AveExpr	t	P.Value	adj.P.Val	B	Genes	description	gene_biotype
PDLIM1	0.174427	17.528	2.89825	0.0164807	0.368151	-3.18591	O00151	PDZ and LIM domain 1 [Source:HGNC Symbol;Acc:HGNC:2067]	protein_coding
SNAP23	-0.159972	16.2827	-2.57337	0.0285129	0.368151	-3.47266	O00161	synaptosome associated protein 23 [Source:HGNC Symbol;Acc:HGNC:11131]	protein_coding
DFFA	0.192215	15.333	2.42733	0.0364812	0.368151	-3.60423	O00273	DNA fragmentation factor subunit alpha [Source:HGNC Symbol;Acc:HGNC:2772]	protein_coding
WASL	0.241248	14.0498	3.10678	0.0116162	0.368151	-3.00803	O00401	WASP like actin nucleation promoting factor [Source:HGNC Symbol;Acc:HGNC:12735]	protein_coding
TOR1A	-0.384289	14.9422	-3.53188	0.00575314	0.368151	-2.66466	O14656	torsin family 1 member A [Source:HGNC Symbol;Acc:HGNC:3098]	protein_coding
PDCD5	0.230349	18.0819	3.22635	0.00951775	0.368151	-2.9087	O14737	programmed cell death 5 [Source:HGNC Symbol;Acc:HGNC:8764]	protein_coding
BCKDK	-0.323411	14.5208	-2.61091	0.0267612	0.368151	-3.43905	O14874	branched chain keto acid dehydrogenase kinase [Source:HGNC Symbol;Acc:HGNC:16902]	protein_coding
TAX1BP3	0.447446	14.2712	2.86061	0.0175589	0.368151	-3.21859	O14907	Tax1 binding protein 3 [Source:HGNC Symbol;Acc:HGNC:30684]	protein_coding
UQCRQ	-0.189162	16.5144	-2.92817	0.0156717	0.368151	-3.16005	O14949	ubiquinol-cytochrome c reductase complex III subunit VII [Source:HGNC Symbol;Acc:HGNC:29594]	protein_coding
WDR46	-0.278618	14.939	-2.8463	0.0179872	0.368151	-3.23105	O15213	WD repeat domain 46 [Source:HGNC Symbol;Acc:HGNC:13923]	protein_coding
NDUFS4	-0.353334	14.6582	-2.9785	0.0144009	0.368151	-3.1168	O43181	NADH:ubiquinone oxidoreductase subunit S4 [Source:HGNC Symbol;Acc:HGNC:7711]	protein_coding
RIPK2	0.405895	15.3449	2.66322	0.024498	0.368151	-3.39239	O43353	receptor interacting serine/threonine kinase 2 [Source:HGNC Symbol;Acc:HGNC:10020]	protein_coding
FOXO3	0.842776	15.2022	3.0428	0.0129288	0.368151	-3.06201	O43524	forkhead box O3 [Source:HGNC Symbol;Acc:HGNC:3821]	protein_coding
RGS10	0.239128	14.5612	2.49476	0.0325595	0.368151	-3.54333	O43665	regulator of G protein signaling 10 [Source:HGNC Symbol;Acc:HGNC:9992]	protein_coding
AKR1B10	0.832074	14.4922	2.80127	0.0194059	0.368151	-3.27043	O60218	aldo-keto reductase family 1 member B10 [Source:HGNC Symbol;Acc:HGNC:382]	protein_coding
PLIN3	0.167116	18.8486	2.82508	0.0186423	0.368151	-3.24958	O60664	perilipin 3 [Source:HGNC Symbol;Acc:HGNC:16893]	protein_coding
PRMT3	0.270658	13.3557	2.96431	0.0147482	0.368151	-3.12896	O60678	protein arginine methyltransferase 3 [Source:HGNC Symbol;Acc:HGNC:30163]	protein_coding
UGDH	0.185198	18.5365	2.46295	0.0343549	0.368151	-3.57204	O60701	UDP-glucose 6-dehydrogenase [Source:HGNC Symbol;Acc:HGNC:12525]	protein_coding
DKC1	-0.188104	16.4836	-2.76738	0.0205476	0.368151	-3.3002	O60832	dyskerin pseudouridine synthase 1 [Source:HGNC Symbol;Acc:HGNC:2890]	protein_coding
ROCK2	0.149286	14.8278	2.46864	0.0340268	0.368151	-3.5669	O75116	Rho associated coiled-coil containing protein kinase 2 [Source:HGNC Symbol;Acc:HGNC:10252]	protein_coding
NIPSNAP2	-0.251513	15.7203	-2.42483	0.0366349	0.368151	-3.60648	O75323	nipsnap homolog 2 [Source:HGNC Symbol;Acc:HGNC:4179]	protein_coding
VPS4B	0.150001	17.0946	2.68273	0.023704	0.368151	-3.37505	O75351	vacuolar protein sorting 4 homolog B [Source:HGNC Symbol;Acc:HGNC:10895]	protein_coding
SH3BGRL	0.39409	16.102	3.28051	0.00869957	0.368151	-2.86438	O75368	SH3 domain binding glutamate rich protein like [Source:HGNC Symbol;Acc:HGNC:10823]	protein_coding
BANF1	-0.513347	16.1343	-2.66971	0.0242311	0.368151	-3.38662	O75531	BAF nuclear assembly factor 1 [Source:HGNC Symbol;Acc:HGNC:17397]	protein_coding
NPM3	-0.213075	16.1598	-2.42198	0.0368118	0.368151	-3.60907	O75607	nucleophosmin/nucleoplasmin 3 [Source:HGNC Symbol;Acc:HGNC:7931]	protein_coding
LYPLA1	0.308406	16.4697	2.56587	0.0288764	0.368151	-3.47938	O75608	lysophospholipase 1 [Source:HGNC Symbol;Acc:HGNC:6737]	protein_coding
PALM	-0.321023	19.9228	-2.95418	0.0150014	0.368151	-3.13767	O75781	paralemmin [Source:HGNC Symbol;Acc:HGNC:8594]	protein_coding
IDH1	0.232949	17.6268	2.56162	0.0290846	0.368151	-3.4832	O75874	isocitrate dehydrogenase (NADP(+)) 1 [Source:HGNC Symbol;Acc:HGNC:5382]	protein_coding
SMNDC1	-0.345459	15.8723	-3.13865	0.0110143	0.368151	-2.98136	O75940	survival motor neuron domain containing 1 [Source:HGNC Symbol;Acc:HGNC:16900]	protein_coding
CLPX	-0.202213	15.4535	-2.50956	0.0317566	0.368151	-3.53	O76031	caseinolytic mitochondrial matrix peptidase chaperone subunit X [Source:HGNC Symbol;Acc:HGNC:2088]	protein_coding
SEC14L2	0.305743	16.4843	2.83237	0.0184146	0.368151	-3.24321	O76054	SEC14 like lipid binding 2 [Source:HGNC Symbol;Acc:HGNC:10699]	protein_coding
SNCG	0.225311	17.6636	2.47111	0.033885	0.368151	-3.56467	O76070	synuclein gamma [Source:HGNC Symbol;Acc:HGNC:11141]	protein_coding
UBE4B	0.428982	13.6766	3.32065	0.00814031	0.368151	-2.83183	O95155	ubiquitination factor E4B [Source:HGNC Symbol;Acc:HGNC:12500]	protein_coding
ZFPL1	-0.346322	15.754	-3.39002	0.00725982	0.368151	-2.77615	O95159	zinc finger protein like 1 [Source:HGNC Symbol;Acc:HGNC:12868]	protein_coding
MPZL1	-1.523	14.0726	-2.49473	0.0325614	0.368151	-3.54336	O95297	myelin protein zero like 1 [Source:HGNC Symbol;Acc:HGNC:7226]	protein_coding
PGLS	0.381353	17.1274	3.46312	0.00643811	0.368151	-2.7183	O95336	6-phosphogluconolactonase [Source:HGNC Symbol;Acc:HGNC:8903]	protein_coding
LYPLA2	0.304413	15.8754	2.74505	0.0213366	0.368151	-3.31988	O95372	lysophospholipase 2 [Source:HGNC Symbol;Acc:HGNC:6738]	protein_coding
ARIH2	1.64516	12.1617	3.14705	0.0108611	0.368151	-2.97435	O95376	ariadne RBR E3 ubiquitin protein ligase 2 [Source:HGNC Symbol;Acc:HGNC:690]	protein_coding
CAVIN2	-0.372232	17.7728	-3.24494	0.00922833	0.368151	-2.89344	O95810	caveolae associated protein 2 [Source:HGNC Symbol;Acc:HGNC:10690]	protein_coding
NUDT3	0.489647	14.0402	3.0387	0.0130178	0.368151	-3.06548	O95989	nudix hydrolase 3 [Source:HGNC Symbol;Acc:HGNC:8050]	protein_coding
NDUFB10	-0.226376	16.9235	-2.47557	0.0336312	0.368151	-3.56064	O96000	NADH:ubiquinone oxidoreductase subunit B10 [Source:HGNC Symbol;Acc:HGNC:7696]	protein_coding
DHFR	0.308653	16.5546	2.58236	0.028083	0.368151	-3.46459	P00374	dihydrofolate reductase [Source:HGNC Symbol;Acc:HGNC:2861]	protein_coding
HPRT1	0.303786	17.5636	2.45202	0.034994	0.368151	-3.58191	P00492	hypoxanthine phosphoribosyltransferase 1 [Source:HGNC Symbol;Acc:HGNC:5157]	protein_coding
GOT2	-0.168058	18.7428	-3.20067	0.00993301	0.368151	-2.92986	P00505	glutamic-oxaloacetic transaminase 2 [Source:HGNC Symbol;Acc:HGNC:4433]	protein_coding
EGFR	-0.140265	16.0605	-2.51074	0.0316934	0.368151	-3.52894	P00533	epidermal growth factor receptor [Source:HGNC Symbol;Acc:HGNC:3236]	protein_coding
ADA	0.506296	15.6575	3.69478	0.00441641	0.368151	-2.54068	P00813	adenosine deaminase [Source:HGNC Symbol;Acc:HGNC:186]	protein_coding
CSTB	0.527002	18.8121	4.00548	0.00269087	0.368151	-2.31653	P04080	cystatin B [Source:HGNC Symbol;Acc:HGNC:2482]	protein_coding
ANXA1	0.244327	20.6009	2.67082	0.0241856	0.368151	-3.38563	P04083	annexin A1 [Source:HGNC Symbol;Acc:HGNC:533]	protein_coding
KRT1	0.73429	18.9842	2.63285	0.0257874	0.368151	-3.41945	P04264	keratin 1 [Source:HGNC Symbol;Acc:HGNC:6412]	protein_coding
ITGB3	0.956457	15.2229	3.46243	0.00644534	0.368151	-2.71884	P05106	integrin subunit beta 3 [Source:HGNC Symbol;Acc:HGNC:6156]	protein_coding
ISG15	0.625052	13.1419	2.80606	0.0192496	0.368151	-3.26622	P05161	ISG15 ubiquitin like modifier [Source:HGNC Symbol;Acc:HGNC:4053]	protein_coding
RPLP2	0.508725	19.5553	3.29982	0.00842583	0.368151	-2.84869	P05387	ribosomal protein lateral stalk subunit P2 [Source:HGNC Symbol;Acc:HGNC:10377]	protein_coding
KRT18	-0.27188	20.7243	-2.75083	0.0211296	0.368151	-3.31478	P05783	keratin 18 [Source:HGNC Symbol;Acc:HGNC:6430]	protein_coding
ENO1	0.256572	22.4423	2.86429	0.0174503	0.368151	-3.21538	P06733	enolase 1 [Source:HGNC Symbol;Acc:HGNC:3350]	protein_coding
TPM3	0.390646	15.9363	2.57251	0.0285545	0.368151	-3.47343	P06753	tropomyosin 3 [Source:HGNC Symbol;Acc:HGNC:12012]	protein_coding
PFN1	0.271511	21.3561	2.51382	0.0315291	0.368151	-3.52617	P07737	profilin 1 [Source:HGNC Symbol;Acc:HGNC:8881]	protein_coding
APRT	0.308126	17.8459	2.56926	0.0287115	0.368151	-3.47634	P07741	adenine phosphoribosyltransferase [Source:HGNC Symbol;Acc:HGNC:626]	protein_coding
PDHA1	-0.248497	17.0664	-3.81324	0.00365099	0.368151	-2.4533	P08559	pyruvate dehydrogenase E1 subunit alpha 1 [Source:HGNC Symbol;Acc:HGNC:8806]	protein_coding
CYC1	-0.254745	17.2191	-2.61165	0.0267277	0.368151	-3.43838	P08574	cytochrome c1 [Source:HGNC Symbol;Acc:HGNC:2579]	protein_coding
SNRPB2	-0.215075	15.9291	-2.6324	0.0258072	0.368151	-3.41985	P08579	small nuclear ribonucleoprotein polypeptide B2 [Source:HGNC Symbol;Acc:HGNC:11155]	protein_coding
SNRPA	-0.175055	17.7241	-2.96692	0.0146837	0.368151	-3.12673	P09012	small nuclear ribonucleoprotein polypeptide A [Source:HGNC Symbol;Acc:HGNC:11151]	protein_coding
LGALS1	0.719194	19.4974	3.15797	0.010665	0.368151	-2.96525	P09382	galectin 1 [Source:HGNC Symbol;Acc:HGNC:6561]	protein_coding
CNP	-0.207283	16.2249	-3.35406	0.00770328	0.368151	-2.80492	P09543	2',3'-cyclic nucleotide 3' phosphodiesterase [Source:HGNC Symbol;Acc:HGNC:2158]	protein_coding
COX6C	-0.333932	16.6752	-3.62163	0.00497136	0.368151	-2.59581	P09669	cytochrome c oxidase subunit 6C [Source:HGNC Symbol;Acc:HGNC:2285]	protein_coding
LTA4H	0.245284	16.982	2.48599	0.0330451	0.368151	-3.55124	P09960	leukotriene A4 hydrolase [Source:HGNC Symbol;Acc:HGNC:6710]	protein_coding
FDX1	-0.750458	13.4082	-2.74701	0.0212661	0.368151	-3.31815	P10109	ferredoxin 1 [Source:HGNC Symbol;Acc:HGNC:3638]	protein_coding
GAA	-0.228306	17.2572	-2.95435	0.0149971	0.368151	-3.13752	P10253	alpha glucosidase [Source:HGNC Symbol;Acc:HGNC:4065]	protein_coding
HSPD1	-0.23738	21.4939	-2.76176	0.0207435	0.368151	-3.30515	P10809	heat shock protein family D (Hsp60) member 1 [Source:HGNC Symbol;Acc:HGNC:5261]	protein_coding
TOP1	-0.165473	16.7728	-2.51109	0.0316743	0.368151	-3.52862	P11387	DNA topoisomerase I [Source:HGNC Symbol;Acc:HGNC:11986]	protein_coding
UNG	-0.289247	14.5083	-3.65143	0.00473696	0.368151	-2.57324	P13051	uracil DNA glycosylase [Source:HGNC Symbol;Acc:HGNC:12572]	protein_coding
ALAD	0.265424	13.8247	2.50632	0.0319303	0.368151	-3.53291	P13716	aminolevulinate dehydratase [Source:HGNC Symbol;Acc:HGNC:395]	protein_coding
UQCRB	-0.345795	16.7782	-3.21498	0.00969938	0.368151	-2.91806	P14927	ubiquinol-cytochrome c reductase binding protein [Source:HGNC Symbol;Acc:HGNC:12582]	protein_coding
ITGB4	-0.368342	15.739	-2.80704	0.0192181	0.368151	-3.26537	P16144	integrin subunit beta 4 [Source:HGNC Symbol;Acc:HGNC:6158]	protein_coding
CBR1	0.277408	19.7397	3.19626	0.0100061	0.368151	-2.9335	P16152	carbonyl reductase 1 [Source:HGNC Symbol;Acc:HGNC:1548]	protein_coding
FAH	0.247694	16.6704	2.89131	0.0166743	0.368151	-3.19193	P16930	fumarylacetoacetate hydrolase [Source:HGNC Symbol;Acc:HGNC:3579]	protein_coding
GJA1	0.567422	13.914	2.85136	0.0178346	0.368151	-3.22664	P17302	gap junction protein alpha 1 [Source:HGNC Symbol;Acc:HGNC:4274]	protein_coding
LGALS3	0.275098	18.6315	2.85157	0.0178284	0.368151	-3.22646	P17931	galectin 3 [Source:HGNC Symbol;Acc:HGNC:6563]	protein_coding
LMNB1	-0.201696	19.1013	-2.64895	0.0250959	0.368151	-3.4051	P20700	lamin B1 [Source:HGNC Symbol;Acc:HGNC:6637]	protein_coding
SDHB	-0.354585	16.2107	-3.62432	0.00494971	0.368151	-2.59377	P21912	succinate dehydrogenase complex iron sulfur subunit B [Source:HGNC Symbol;Acc:HGNC:10681]	protein_coding
FBL	-0.304936	17.0126	-3.37792	0.00740599	0.368151	-2.78581	P22087	fibrillarin [Source:HGNC Symbol;Acc:HGNC:3599]	protein_coding
SFPQ	-0.227725	19.7014	-3.00406	0.0137962	0.368151	-3.09496	P23246	splicing factor proline and glutamine rich [Source:HGNC Symbol;Acc:HGNC:10774]	protein_coding
ACP1	0.409047	16.7116	3.06261	0.0125069	0.368151	-3.04524	P24666	acid phosphatase 1 [Source:HGNC Symbol;Acc:HGNC:122]	protein_coding
ACAT1	-0.353572	17.1981	-2.51752	0.0313326	0.368151	-3.52283	P24752	acetyl-CoA acetyltransferase 1 [Source:HGNC Symbol;Acc:HGNC:93]	protein_coding
MSN	0.160797	19.1685	2.52321	0.0310331	0.368151	-3.51771	P26038	moesin [Source:HGNC Symbol;Acc:HGNC:7373]	protein_coding
S100A4	0.243002	20.736	3.0212	0.0134053	0.368151	-3.08036	P26447	S100 calcium binding protein A4 [Source:HGNC Symbol;Acc:HGNC:10494]	protein_coding
MGAT1	-0.328047	14.6465	-2.79951	0.0194636	0.368151	-3.27197	P26572	alpha-1,3-mannosyl-glycoprotein 2-beta-N-acetylglucosaminyltransferase [Source:HGNC Symbol;Acc:HGNC:7044]	protein_coding
AK4	-0.197768	16.6442	-2.5602	0.0291539	0.368151	-3.48447	P27144	adenylate kinase 4 [Source:HGNC Symbol;Acc:HGNC:363]	protein_coding
GTF2E1	0.730389	14.3417	2.95771	0.0149125	0.368151	-3.13463	P29083	general transcription factor IIE subunit 1 [Source:HGNC Symbol;Acc:HGNC:4650]	protein_coding
IMPA1	0.186193	16.8551	2.43623	0.035938	0.368151	-3.59618	P29218	inositol monophosphatase 1 [Source:HGNC Symbol;Acc:HGNC:6050]	protein_coding
ERP29	-0.207325	19.7577	-2.54985	0.0296682	0.368151	-3.49376	P30040	endoplasmic reticulum protein 29 [Source:HGNC Symbol;Acc:HGNC:13799]	protein_coding
PEBP1	0.343475	17.8578	3.1307	0.0111614	0.368151	-2.988	P30086	phosphatidylethanolamine binding protein 1 [Source:HGNC Symbol;Acc:HGNC:8630]	protein_coding
PPP2R1B	0.416209	12.8337	3.32625	0.00806529	0.368151	-2.8273	P30154	protein phosphatase 2 scaffold subunit Abeta [Source:HGNC Symbol;Acc:HGNC:9303]	protein_coding
PPIF	-0.470619	15.3204	-3.93872	0.00299005	0.368151	-2.36332	P30405	peptidylprolyl isomerase F [Source:HGNC Symbol;Acc:HGNC:9259]	protein_coding
AXL	-0.233415	16.9374	-4.06432	0.00245328	0.368151	-2.27592	P30530	AXL receptor tyrosine kinase [Source:HGNC Symbol;Acc:HGNC:905]	protein_coding
SLC7A1	-0.440624	14.7985	-2.55302	0.0295099	0.368151	-3.49092	P30825	solute carrier family 7 member 1 [Source:HGNC Symbol;Acc:HGNC:11057]	protein_coding
ALDH1B1	-0.245435	17.8596	-3.13499	0.0110817	0.368151	-2.98441	P30837	aldehyde dehydrogenase 1 family member B1 [Source:HGNC Symbol;Acc:HGNC:407]	protein_coding
ATIC	0.143985	18.4372	2.54022	0.0301545	0.368151	-3.50241	P31939	5-aminoimidazole-4-carboxamide ribonucleotide formyltransferase/IMP cyclohydrolase [Source:HGNC Symbol;Acc:HGNC:794]	protein_coding
S100A11	0.85949	16.6346	3.73127	0.00416416	0.368151	-2.51351	P31949	S100 calcium binding protein A11 [Source:HGNC Symbol;Acc:HGNC:10488]	protein_coding
L1CAM	-0.807957	15.0906	-4.19494	0.00200153	0.368151	-2.18786	P32004	L1 cell adhesion molecule [Source:HGNC Symbol;Acc:HGNC:6470]	protein_coding
CDA	0.280399	16.4743	2.6954	0.0232024	0.368151	-3.36381	P32320	cytidine deaminase [Source:HGNC Symbol;Acc:HGNC:1712]	protein_coding
PYCR1	-0.246443	15.6091	-2.42158	0.0368363	0.368151	-3.60943	P32322	pyrroline-5-carboxylate reductase 1 [Source:HGNC Symbol;Acc:HGNC:9721]	protein_coding
RPL9	-0.317318	18.377	-2.49509	0.0325415	0.368151	-3.54304	P32969	ribosomal protein L9 [Source:HGNC Symbol;Acc:HGNC:10369]	protein_coding
ABCC1	-0.206862	15.6059	-2.96775	0.0146632	0.368151	-3.12601	P33527	ATP binding cassette subfamily C member 1 [Source:HGNC Symbol;Acc:HGNC:51]	protein_coding
SHMT2	-0.257212	18.8724	-3.11305	0.0114953	0.368151	-3.00278	P34897	serine hydroxymethyltransferase 2 [Source:HGNC Symbol;Acc:HGNC:10852]	protein_coding
HSPA4	0.189528	18.2799	2.54288	0.0300193	0.368151	-3.50002	P34932	heat shock protein family A (Hsp70) member 4 [Source:HGNC Symbol;Acc:HGNC:5237]	protein_coding
GLRX	0.706453	11.9537	2.82333	0.0186974	0.368151	-3.25111	P35754	glutaredoxin [Source:HGNC Symbol;Acc:HGNC:4330]	protein_coding
ARL3	0.329826	15.663	2.98251	0.0143043	0.368151	-3.11337	P36405	ADP ribosylation factor like GTPase 3 [Source:HGNC Symbol;Acc:HGNC:694]	protein_coding
MAP2K2	0.293312	16.2914	2.7554	0.0209673	0.368151	-3.31075	P36507	mitogen-activated protein kinase kinase 2 [Source:HGNC Symbol;Acc:HGNC:6842]	protein_coding
RBMX	-0.34465	18.4767	-2.44383	0.0354806	0.368151	-3.58931	P38159	RNA binding motif protein X-linked [Source:HGNC Symbol;Acc:HGNC:9910]	protein_coding
CAPG	0.248577	18.7428	2.69493	0.0232205	0.368151	-3.36422	P40121	capping actin protein, gelsolin like [Source:HGNC Symbol;Acc:HGNC:1474]	protein_coding
MDH1	0.221045	19.3799	2.43869	0.0357891	0.368151	-3.59395	P40925	malate dehydrogenase 1 [Source:HGNC Symbol;Acc:HGNC:6970]	protein_coding
ACTR1B	-0.317626	15.2484	-2.82655	0.018596	0.368151	-3.24829	P42025	actin related protein 1B [Source:HGNC Symbol;Acc:HGNC:168]	protein_coding
RBM34	-0.345522	13.6365	-3.60215	0.00513103	0.368151	-2.61064	P42696	RNA binding motif protein 34 [Source:HGNC Symbol;Acc:HGNC:28965]	protein_coding
TSFM	-0.325115	15.3745	-2.55856	0.029235	0.368151	-3.48594	P43897	Ts translation elongation factor, mitochondrial [Source:HGNC Symbol;Acc:HGNC:12367]	protein_coding
MAP1B	0.184069	17.6162	2.8585	0.0176213	0.368151	-3.22042	P46821	microtubule associated protein 1B [Source:HGNC Symbol;Acc:HGNC:6836]	protein_coding
ATP5PO	-0.154597	19.0747	-2.71095	0.022601	0.368151	-3.35002	P48047	ATP synthase peripheral stalk subunit OSCP [Source:HGNC Symbol;Acc:HGNC:850]	protein_coding
GCLC	0.287462	14.3041	3.28407	0.00864848	0.368151	-2.86149	P48506	glutamate-cysteine ligase catalytic subunit [Source:HGNC Symbol;Acc:HGNC:4311]	protein_coding
MRPL19	-0.197867	15.5759	-2.58346	0.0280313	0.368151	-3.46362	P49406	mitochondrial ribosomal protein L19 [Source:HGNC Symbol;Acc:HGNC:14052]	protein_coding
TUFM	-0.14878	18.9771	-2.43011	0.0363105	0.368151	-3.60171	P49411	Tu translation elongation factor, mitochondrial [Source:HGNC Symbol;Acc:HGNC:12420]	protein_coding
EMD	-0.19492	17.7271	-2.44768	0.0352511	0.368151	-3.58583	P50402	emerin [Source:HGNC Symbol;Acc:HGNC:3331]	protein_coding
SERPINB9	0.372157	15.9319	2.86488	0.017433	0.368151	-3.21487	P50453	serpin family B member 9 [Source:HGNC Symbol;Acc:HGNC:8955]	protein_coding
PDLIM4	1.15701	13.1394	3.72756	0.00418909	0.368151	-2.51626	P50479	PDZ and LIM domain 4 [Source:HGNC Symbol;Acc:HGNC:16501]	protein_coding
CDK9	-0.249793	13.7071	-2.84995	0.0178771	0.368151	-3.22788	P50750	cyclin dependent kinase 9 [Source:HGNC Symbol;Acc:HGNC:1780]	protein_coding
BCAM	-0.298548	15.9668	-2.96718	0.0146773	0.368151	-3.1265	P50895	basal cell adhesion molecule (Lutheran blood group) [Source:HGNC Symbol;Acc:HGNC:6722]	protein_coding
RAB9A	-0.216756	16.1251	-2.46253	0.0343793	0.368151	-3.57242	P51151	RAB9A, member RAS oncogene family [Source:HGNC Symbol;Acc:HGNC:9792]	protein_coding
DUSP3	0.42907	16.1829	3.31856	0.00816851	0.368151	-2.83352	P51452	dual specificity phosphatase 3 [Source:HGNC Symbol;Acc:HGNC:3069]	protein_coding
MECP2	-0.26489	14.8796	-2.88819	0.0167621	0.368151	-3.19463	P51608	methyl-CpG binding protein 2 [Source:HGNC Symbol;Acc:HGNC:6990]	protein_coding
HSD17B4	-0.193609	18.3633	-2.61345	0.0266466	0.368151	-3.43678	P51659	hydroxysteroid 17-beta dehydrogenase 4 [Source:HGNC Symbol;Acc:HGNC:5213]	protein_coding
PGD	0.177198	18.3831	2.42414	0.0366777	0.368151	-3.60711	P52209	phosphogluconate dehydrogenase [Source:HGNC Symbol;Acc:HGNC:8891]	protein_coding
ARHGDIA	0.354071	19.0634	3.23447	0.00939014	0.368151	-2.90202	P52565	Rho GDP dissociation inhibitor alpha [Source:HGNC Symbol;Acc:HGNC:678]	protein_coding
THOP1	0.187195	16.6176	2.71119	0.0225917	0.368151	-3.34981	P52888	thimet oligopeptidase 1 [Source:HGNC Symbol;Acc:HGNC:11793]	protein_coding
PLK1	0.409733	12.9122	2.52662	0.0308552	0.368151	-3.51465	P53350	polo like kinase 1 [Source:HGNC Symbol;Acc:HGNC:9077]	protein_coding
NUBP1	0.653736	14.3444	2.53389	0.0304784	0.368151	-3.5081	P53384	NUBP iron-sulfur cluster assembly factor 1, cytosolic [Source:HGNC Symbol;Acc:HGNC:8041]	protein_coding
SUCLG1	-0.209943	16.2536	-3.45646	0.00650879	0.368151	-2.72353	P53597	succinate-CoA ligase GDP/ADP-forming subunit alpha [Source:HGNC Symbol;Acc:HGNC:11449]	protein_coding
RAD23B	0.412465	16.8134	2.59146	0.0276549	0.368151	-3.45645	P54727	RAD23 homolog B, nucleotide excision repair protein [Source:HGNC Symbol;Acc:HGNC:9813]	protein_coding
ALDH18A1	-0.186353	17.8436	-2.56462	0.0289372	0.368151	-3.4805	P54886	aldehyde dehydrogenase 18 family member A1 [Source:HGNC Symbol;Acc:HGNC:9722]	protein_coding
CSE1L	0.262802	17.6305	2.49452	0.032573	0.368151	-3.54355	P55060	chromosome segregation 1 like [Source:HGNC Symbol;Acc:HGNC:2431]	protein_coding
ATP5F1E	-0.346434	16.2231	-3.30033	0.00841868	0.368151	-2.84828	P56381	ATP synthase F1 subunit epsilon [Source:HGNC Symbol;Acc:HGNC:838]	protein_coding
ATP5ME	-0.432081	17.4412	-2.62991	0.0259158	0.368151	-3.42207	P56385	ATP synthase membrane subunit e [Source:HGNC Symbol;Acc:HGNC:846]	protein_coding
PEX3	-0.870661	15.4609	-3.61227	0.00504738	0.368151	-2.60293	P56589	peroxisomal biogenesis factor 3 [Source:HGNC Symbol;Acc:HGNC:8858]	protein_coding
SEC61B	-0.258511	17.4853	-2.77207	0.0203857	0.368151	-3.29607	P60468	SEC61 translocon subunit beta [Source:HGNC Symbol;Acc:HGNC:16993]	protein_coding
SPCS3	-0.431216	15.5901	-2.56004	0.0291623	0.368151	-3.48462	P61009	signal peptidase complex subunit 3 [Source:HGNC Symbol;Acc:HGNC:26212]	protein_coding
RAB14	-0.173925	17.0137	-2.70756	0.0227307	0.368151	-3.35302	P61106	RAB14, member RAS oncogene family [Source:HGNC Symbol;Acc:HGNC:16524]	protein_coding
MAX	-0.214118	14.0539	-2.78216	0.0200415	0.368151	-3.2872	P61244	MYC associated factor X [Source:HGNC Symbol;Acc:HGNC:6913]	protein_coding
SUMO2	0.558639	14.3735	2.56357	0.0289885	0.368151	-3.48144	P61956	small ubiquitin like modifier 2 [Source:HGNC Symbol;Acc:HGNC:11125]	protein_coding
RRAS2	-0.187134	16.6559	-3.19541	0.0100203	0.368151	-2.9342	P62070	RAS related 2 [Source:HGNC Symbol;Acc:HGNC:17271]	protein_coding
TIMM10	-0.364121	14.6435	-2.45428	0.0348608	0.368151	-3.57986	P62072	translocase of inner mitochondrial membrane 10 [Source:HGNC Symbol;Acc:HGNC:11814]	protein_coding
RPS23	-0.663041	18.2203	-2.47055	0.0339172	0.368151	-3.56517	P62266	ribosomal protein S23 [Source:HGNC Symbol;Acc:HGNC:10410]	protein_coding
SNRPF	0.193963	18.0357	2.69544	0.0232008	0.368151	-3.36377	P62306	small nuclear ribonucleoprotein polypeptide F [Source:HGNC Symbol;Acc:HGNC:11162]	protein_coding
H4C1	-0.317999	23.8688	-3.05515	0.0126641	0.368151	-3.05155	P62805	H4 clustered histone 1 [Source:HGNC Symbol;Acc:HGNC:4781]	protein_coding
PPP2CA	0.24977	14.9964	3.09141	0.0119186	0.368151	-3.02095	P67775	protein phosphatase 2 catalytic subunit alpha [Source:HGNC Symbol;Acc:HGNC:9299]	protein_coding
UBE2L3	0.392323	16.542	3.15837	0.010658	0.368151	-2.96493	P68036	ubiquitin conjugating enzyme E2 L3 [Source:HGNC Symbol;Acc:HGNC:12488]	protein_coding
SIRPA	0.738103	13.717	2.53627	0.0303566	0.368151	-3.50597	P78324	signal regulatory protein alpha [Source:HGNC Symbol;Acc:HGNC:9662]	protein_coding
GTF2I	-0.191331	18.9922	-2.73186	0.0218171	0.368151	-3.33152	P78347	general transcription factor IIi [Source:HGNC Symbol;Acc:HGNC:4659]	protein_coding
GSTO1	0.409337	18.3534	2.44219	0.0355786	0.368151	-3.59079	P78417	glutathione S-transferase omega 1 [Source:HGNC Symbol;Acc:HGNC:13312]	protein_coding
MRPS5	-0.331213	14.3332	-2.70784	0.0227198	0.368151	-3.35277	P82675	mitochondrial ribosomal protein S5 [Source:HGNC Symbol;Acc:HGNC:14498]	protein_coding
MRPS15	-0.324007	14.088	-3.03504	0.0130979	0.368151	-3.06859	P82914	mitochondrial ribosomal protein S15 [Source:HGNC Symbol;Acc:HGNC:14504]	protein_coding
MRPS9	-0.282371	14.7817	-2.46175	0.0344241	0.368151	-3.57311	P82933	mitochondrial ribosomal protein S9 [Source:HGNC Symbol;Acc:HGNC:14501]	protein_coding
HSPG2	-0.309262	15.2022	-2.79866	0.0194915	0.368151	-3.27272	P98160	heparan sulfate proteoglycan 2 [Source:HGNC Symbol;Acc:HGNC:5273]	protein_coding
RBM10	-0.165847	14.8259	-2.41703	0.03712	0.368151	-3.61355	P98175	RNA binding motif protein 10 [Source:HGNC Symbol;Acc:HGNC:9896]	protein_coding
CDK5	0.23717	14.1186	2.68817	0.0234872	0.368151	-3.37022	Q00535	cyclin dependent kinase 5 [Source:HGNC Symbol;Acc:HGNC:1774]	protein_coding
REEP5	-0.189663	17.1669	-3.28673	0.0086105	0.368151	-2.85933	Q00765	receptor accessory protein 5 [Source:HGNC Symbol;Acc:HGNC:30077]	protein_coding
HNRNPU	-0.247365	21.0892	-3.07306	0.0122902	0.368151	-3.03642	Q00839	heterogeneous nuclear ribonucleoprotein U [Source:HGNC Symbol;Acc:HGNC:5048]	protein_coding
MC2R	-3.75255	13.3315	-2.92129	0.0158542	0.368151	-3.16599	Q01718	melanocortin 2 receptor [Source:HGNC Symbol;Acc:HGNC:6930]	protein_coding
MAP2K1	0.251072	15.0517	2.67594	0.0239773	0.368151	-3.38108	Q02750	mitogen-activated protein kinase kinase 1 [Source:HGNC Symbol;Acc:HGNC:6840]	protein_coding
CAV1	-0.213152	18.763	-3.34787	0.00778241	0.368151	-2.8099	Q03135	caveolin 1 [Source:HGNC Symbol;Acc:HGNC:1527]	protein_coding
LMNB2	-0.20114	19.203	-2.55258	0.0295317	0.368151	-3.49131	Q03252	lamin B2 [Source:HGNC Symbol;Acc:HGNC:6638]	protein_coding
GLO1	0.236192	18.8401	2.63361	0.0257545	0.368151	-3.41878	Q04760	glyoxalase I [Source:HGNC Symbol;Acc:HGNC:4323]	protein_coding
SSBP1	-0.196876	18.0425	-3.13918	0.0110046	0.368151	-2.98092	Q04837	single stranded DNA binding protein 1 [Source:HGNC Symbol;Acc:HGNC:11317]	protein_coding
RING1	-0.174063	14.8059	-2.55366	0.0294777	0.368151	-3.49034	Q06587	ring finger protein 1 [Source:HGNC Symbol;Acc:HGNC:10018]	protein_coding
MFGE8	-0.242643	14.1157	-2.66225	0.0245384	0.368151	-3.39326	Q08431	milk fat globule EGF and factor V/VIII domain containing [Source:HGNC Symbol;Acc:HGNC:7036]	protein_coding
SCRN3	0.912395	11.9986	3.47498	0.00631411	0.368151	-2.70899	Q0VDG4	secernin 3 [Source:HGNC Symbol;Acc:HGNC:30382]	protein_coding
PTPRJ	-0.178688	13.9528	-2.41758	0.0370855	0.368151	-3.61305	Q12913	protein tyrosine phosphatase receptor type J [Source:HGNC Symbol;Acc:HGNC:9673]	protein_coding
TRAP1	-0.148209	18.3001	-2.67259	0.0241133	0.368151	-3.38406	Q12931	TNF receptor associated protein 1 [Source:HGNC Symbol;Acc:HGNC:16264]	protein_coding
PAK2	0.156618	17.707	2.47674	0.033565	0.368151	-3.55959	Q13177	p21 (RAC1) activated kinase 2 [Source:HGNC Symbol;Acc:HGNC:8591]	protein_coding
XRCC4	-0.526431	14.3569	-2.66617	0.0243765	0.368151	-3.38977	Q13426	X-ray repair cross complementing 4 [Source:HGNC Symbol;Acc:HGNC:12831]	protein_coding
DCTN2	0.160199	18.2148	2.42864	0.0364006	0.368151	-3.60304	Q13561	dynactin subunit 2 [Source:HGNC Symbol;Acc:HGNC:2712]	protein_coding
MOGS	-0.186181	15.8184	-2.79991	0.0194504	0.368151	-3.27162	Q13724	mannosyl-oligosaccharide glucosidase [Source:HGNC Symbol;Acc:HGNC:24862]	protein_coding
ALCAM	-0.272902	18.8364	-2.95412	0.0150028	0.368151	-3.13771	Q13740	activated leukocyte cell adhesion molecule [Source:HGNC Symbol;Acc:HGNC:400]	protein_coding
IDI1	0.431237	13.6354	2.59714	0.0273909	0.368151	-3.45136	Q13907	isopentenyl-diphosphate delta isomerase 1 [Source:HGNC Symbol;Acc:HGNC:5387]	protein_coding
SAFB2	-0.296898	15.2339	-2.4596	0.0345492	0.368151	-3.57506	Q14151	scaffold attachment factor B2 [Source:HGNC Symbol;Acc:HGNC:21605]	protein_coding
LAGE3	0.2871	14.8543	3.11914	0.011379	0.368151	-2.99767	Q14657	L antigen family member 3 [Source:HGNC Symbol;Acc:HGNC:26058]	protein_coding
MELK	-0.612457	14.3441	-2.59547	0.0274681	0.368151	-3.45286	Q14680	maternal embryonic leucine zipper kinase [Source:HGNC Symbol;Acc:HGNC:16870]	protein_coding
MESD	-0.252843	15.5617	-2.5817	0.0281147	0.368151	-3.46519	Q14696	mesoderm development LRP chaperone [Source:HGNC Symbol;Acc:HGNC:13520]	protein_coding
LBR	-0.226218	17.1391	-2.41657	0.0371484	0.368151	-3.61396	Q14739	lamin B receptor [Source:HGNC Symbol;Acc:HGNC:6518]	protein_coding
NCAPH	0.201768	16.0502	3.30988	0.00828662	0.368151	-2.84054	Q15003	non-SMC condensin I complex subunit H [Source:HGNC Symbol;Acc:HGNC:1112]	protein_coding
WTAP	-0.258327	13.8774	-2.57454	0.0284566	0.368151	-3.47161	Q15007	WT1 associated protein [Source:HGNC Symbol;Acc:HGNC:16846]	protein_coding
EIF4H	0.162181	19.6585	2.43332	0.0361144	0.368151	-3.5988	Q15056	eukaryotic translation initiation factor 4H [Source:HGNC Symbol;Acc:HGNC:12741]	protein_coding
DLGAP5	0.219025	14.4788	2.42238	0.0367866	0.368151	-3.6087	Q15398	DLG associated protein 5 [Source:HGNC Symbol;Acc:HGNC:16864]	protein_coding
TRADD	0.517139	13.5551	2.74212	0.0214423	0.368151	-3.32246	Q15628	TNFRSF1A associated via death domain [Source:HGNC Symbol;Acc:HGNC:12030]	protein_coding
MAPRE1	0.169926	17.4445	2.78953	0.0197939	0.368151	-3.28073	Q15691	microtubule associated protein RP/EB family member 1 [Source:HGNC Symbol;Acc:HGNC:6890]	protein_coding
MYLK	-0.178523	16.2069	-2.56331	0.0290015	0.368151	-3.48168	Q15746	myosin light chain kinase [Source:HGNC Symbol;Acc:HGNC:7590]	protein_coding
ZYX	0.360617	18.1901	4.12607	0.00222759	0.368151	-2.23393	Q15942	zyxin [Source:HGNC Symbol;Acc:HGNC:13200]	protein_coding
EXT1	-0.438735	11.179	-2.49007	0.0328182	0.368151	-3.54756	Q16394	exostosin glycosyltransferase 1 [Source:HGNC Symbol;Acc:HGNC:3512]	protein_coding
CSRP2	0.180033	15.4559	2.41685	0.0371309	0.368151	-3.6137	Q16527	cysteine and glycine rich protein 2 [Source:HGNC Symbol;Acc:HGNC:2470]	protein_coding
MRPL23	-0.313093	15.8238	-2.74154	0.0214634	0.368151	-3.32297	Q16540	mitochondrial ribosomal protein L23 [Source:HGNC Symbol;Acc:HGNC:10322]	protein_coding
MAPKAPK3	0.21853	14.7147	2.97241	0.0145489	0.368151	-3.12202	Q16644	MAPK activated protein kinase 3 [Source:HGNC Symbol;Acc:HGNC:6888]	protein_coding
H3-4	-0.53919	23.4701	-2.51858	0.0312765	0.368151	-3.52188	Q16695	H3.4 histone [Source:HGNC Symbol;Acc:HGNC:4778]	protein_coding
CLPP	-0.202707	15.9268	-3.61582	0.00501838	0.368151	-2.60022	Q16740	caseinolytic mitochondrial matrix peptidase proteolytic subunit [Source:HGNC Symbol;Acc:HGNC:2084]	protein_coding
TST	-0.475051	14.0077	-2.96963	0.0146169	0.368151	-3.1244	Q16762	thiosulfate sulfurtransferase [Source:HGNC Symbol;Acc:HGNC:12388]	protein_coding
GUK1	0.364054	14.1455	3.00529	0.0137678	0.368151	-3.09391	Q16774	guanylate kinase 1 [Source:HGNC Symbol;Acc:HGNC:4693]	protein_coding
HNRNPUL2	-0.229072	17.5444	-2.59005	0.027721	0.368151	-3.45771	Q1KMD3	heterogeneous nuclear ribonucleoprotein U like 2 [Source:HGNC Symbol;Acc:HGNC:25451]	protein_coding
HKDC1	-0.201714	17.503	-2.67307	0.0240939	0.368151	-3.38363	Q2TB90	hexokinase domain containing 1 [Source:HGNC Symbol;Acc:HGNC:23302]	protein_coding
LRRFIP1	0.188388	16.7316	2.59097	0.027678	0.368151	-3.45689	Q32MZ4	LRR binding FLII interacting protein 1 [Source:HGNC Symbol;Acc:HGNC:6702]	protein_coding
GLYR1	-0.24552	14.8797	-2.72051	0.022239	0.368151	-3.34156	Q49A26	glyoxylate reductase 1 homolog [Source:HGNC Symbol;Acc:HGNC:24434]	protein_coding
TP53I3	0.395056	14.3516	4.59144	0.00109487	0.368151	-1.93793	Q53FA7	tumor protein p53 inducible protein 3 [Source:HGNC Symbol;Acc:HGNC:19373]	protein_coding
MTX3	-0.346281	13.3742	-2.4889	0.0328832	0.368151	-3.54862	Q5HYI7	metaxin 3 [Source:HGNC Symbol;Acc:HGNC:24812]	protein_coding
MIA3	-0.331814	14.0068	-3.37644	0.00742409	0.368151	-2.78699	Q5JRA6	MIA SH3 domain ER export factor 3 [Source:HGNC Symbol;Acc:HGNC:24008]	protein_coding
PDZK1	0.721454	14.9986	2.56853	0.0287468	0.368151	-3.47699	Q5T2W1	PDZ domain containing 1 [Source:HGNC Symbol;Acc:HGNC:8821]	protein_coding
MRPL2	-0.221561	15.7676	-3.1943	0.0100389	0.368151	-2.93513	Q5T653	mitochondrial ribosomal protein L2 [Source:HGNC Symbol;Acc:HGNC:14056]	protein_coding
ATAD3B	-0.495059	14.595	-3.66973	0.00459872	0.368151	-2.55945	Q5T9A4	ATPase family AAA domain containing 3B [Source:HGNC Symbol;Acc:HGNC:24007]	protein_coding
LYRM7	-0.590002	12.9258	-3.63468	0.00486724	0.368151	-2.58591	Q5U5X0	LYR motif containing 7 [Source:HGNC Symbol;Acc:HGNC:28072]	protein_coding
CIAPIN1	0.232935	15.4771	3.26689	0.00889825	0.368151	-2.87548	Q6FI81	cytokine induced apoptosis inhibitor 1 [Source:HGNC Symbol;Acc:HGNC:28050]	protein_coding
KRT80	-0.235214	13.9182	-2.8238	0.0186824	0.368151	-3.2507	Q6KB66	keratin 80 [Source:HGNC Symbol;Acc:HGNC:27056]	protein_coding
SLC25A24	-0.337501	17.1966	-3.64133	0.00481508	0.368151	-2.58088	Q6NUK1	solute carrier family 25 member 24 [Source:HGNC Symbol;Acc:HGNC:20662]	protein_coding
REEP3	-0.253615	13.8966	-2.53559	0.0303912	0.368151	-3.50658	Q6NUK4	receptor accessory protein 3 [Source:HGNC Symbol;Acc:HGNC:23711]	protein_coding
RINT1	1.02739	11.1716	2.76461	0.0206439	0.368151	-3.30264	Q6NUQ1	RAD50 interactor 1 [Source:HGNC Symbol;Acc:HGNC:21876]	protein_coding
HIBCH	-0.255084	15.3223	-2.44352	0.035499	0.368151	-3.58959	Q6NVY1	3-hydroxyisobutyryl-CoA hydrolase [Source:HGNC Symbol;Acc:HGNC:4908]	protein_coding
CAVIN1	-0.179618	19.0843	-2.53347	0.0305002	0.368151	-3.50848	Q6NZI2	caveolae associated protein 1 [Source:HGNC Symbol;Acc:HGNC:9688]	protein_coding
METTL2B	0.547319	12.4735	3.2012	0.00992412	0.368151	-2.92942	Q6P1Q9	methyltransferase 2B, methylcytidine [Source:HGNC Symbol;Acc:HGNC:18272]	protein_coding
KLC3	1.36186	10.4113	4.12255	0.00223984	0.368151	-2.2363	Q6P597	kinesin light chain 3 [Source:HGNC Symbol;Acc:HGNC:20717]	protein_coding
ATRAID	-1.37859	13.7541	-2.56762	0.0287913	0.368151	-3.47782	Q6UW56	all-trans retinoic acid induced differentiation factor [Source:HGNC Symbol;Acc:HGNC:24090]	protein_coding
RAB11FIP1	-0.294029	15.8742	-3.95781	0.00290106	0.368151	-2.34986	Q6WKZ4	RAB11 family interacting protein 1 [Source:HGNC Symbol;Acc:HGNC:30265]	protein_coding
DNMBP	-0.299895	13.0391	-2.5518	0.0295708	0.368151	-3.49201	Q6XZF7	dynamin binding protein [Source:HGNC Symbol;Acc:HGNC:30373]	protein_coding
SYDE1	0.556894	10.3127	3.09151	0.0119165	0.368151	-3.02086	Q6ZW31	synapse defective Rho GTPase homolog 1 [Source:HGNC Symbol;Acc:HGNC:25824]	protein_coding
UBE2R2	0.310888	15.1141	2.45112	0.0350471	0.368151	-3.58272	Q712K3	ubiquitin conjugating enzyme E2 R2 [Source:HGNC Symbol;Acc:HGNC:19907]	protein_coding
BTN2A1	-0.620946	12.3289	-2.85494	0.0177273	0.368151	-3.22352	Q7KYR7	butyrophilin subfamily 2 member A1 [Source:HGNC Symbol;Acc:HGNC:1136]	protein_coding
TAOK1	-0.283713	13.248	-2.61124	0.0267462	0.368151	-3.43875	Q7L7X3	TAO kinase 1 [Source:HGNC Symbol;Acc:HGNC:29259]	protein_coding
POGLUT3	1.60721	12.2193	2.64717	0.0251712	0.368151	-3.40668	Q7Z4H8	protein O-glucosyltransferase 3 [Source:HGNC Symbol;Acc:HGNC:28496]	protein_coding
VPS36	0.849382	11.0406	3.32821	0.00803925	0.368151	-2.82572	Q86VN1	vacuolar protein sorting 36 homolog [Source:HGNC Symbol;Acc:HGNC:20312]	protein_coding
BPHL	-0.302275	15.3683	-3.26593	0.0089124	0.368151	-2.87627	Q86WA6	biphenyl hydrolase like [Source:HGNC Symbol;Acc:HGNC:1094]	protein_coding
SPATS2	0.154631	14.5394	2.5881	0.0278124	0.368151	-3.45946	Q86XZ4	spermatogenesis associated serine rich 2 [Source:HGNC Symbol;Acc:HGNC:18650]	protein_coding
MISP	-0.347153	16.7578	-2.51768	0.0313243	0.368151	-3.52269	Q8IVT2	mitotic spindle positioning [Source:HGNC Symbol;Acc:HGNC:27000]	protein_coding
RHOT2	-0.236675	15.6609	-2.53615	0.0303626	0.368151	-3.50608	Q8IXI1	ras homolog family member T2 [Source:HGNC Symbol;Acc:HGNC:21169]	protein_coding
RHOT1	-0.345972	14.6827	-3.13095	0.0111568	0.368151	-2.98779	Q8IXI2	ras homolog family member T1 [Source:HGNC Symbol;Acc:HGNC:21168]	protein_coding
DHX37	-0.279329	13.9365	-3.08391	0.012069	0.368151	-3.02726	Q8IY37	DEAH-box helicase 37 [Source:HGNC Symbol;Acc:HGNC:17210]	protein_coding
RPUSD2	0.209198	12.9831	3.39099	0.00724828	0.368151	-2.77538	Q8IZ73	RNA pseudouridine synthase domain containing 2 [Source:HGNC Symbol;Acc:HGNC:24180]	protein_coding
PALS1	-0.246771	15.2215	-3.39561	0.00719326	0.368151	-2.77169	Q8N3R9	protein associated with LIN7 1, MAGUK p55 family member [Source:HGNC Symbol;Acc:HGNC:18669]	protein_coding
MMGT1	-0.212836	15.0779	-3.49954	0.00606533	0.368151	-2.68979	Q8N4V1	membrane magnesium transporter 1 [Source:HGNC Symbol;Acc:HGNC:28100]	protein_coding
PDPR	-0.279231	15.149	-3.77763	0.00386523	0.368151	-2.47931	Q8NCN5	pyruvate dehydrogenase phosphatase regulatory subunit [Source:HGNC Symbol;Acc:HGNC:30264]	protein_coding
CCNY	-0.217331	17.4255	-2.45694	0.0347045	0.368151	-3.57746	Q8ND76	cyclin Y [Source:HGNC Symbol;Acc:HGNC:23354]	protein_coding
SVIP	-0.527267	13.4814	-2.85164	0.0178262	0.368151	-3.2264	Q8NHG7	small VCP interacting protein [Source:HGNC Symbol;Acc:HGNC:25238]	protein_coding
MICAL1	0.424757	15.9466	2.63505	0.0256921	0.368151	-3.41749	Q8TDZ2	microtubule associated monooxygenase, calponin and LIM domain containing 1 [Source:HGNC Symbol;Acc:HGNC:20619]	protein_coding
GPX8	-0.285921	15.8803	-2.8474	0.0179539	0.368151	-3.23009	Q8TED1	glutathione peroxidase 8 (putative) [Source:HGNC Symbol;Acc:HGNC:33100]	protein_coding
NUP210	-0.374666	14.6223	-2.84845	0.0179224	0.368151	-3.22918	Q8TEM1	nucleoporin 210 [Source:HGNC Symbol;Acc:HGNC:30052]	protein_coding
UBASH3B	-0.583687	12.755	-3.03079	0.0131916	0.368151	-3.07221	Q8TF42	ubiquitin associated and SH3 domain containing B [Source:HGNC Symbol;Acc:HGNC:29884]	protein_coding
NOC3L	-0.29394	15.0678	-2.88452	0.016866	0.368151	-3.19781	Q8WTT2	NOC3 like DNA replication regulator [Source:HGNC Symbol;Acc:HGNC:24034]	protein_coding
PDCD6IP	0.192039	18.1935	2.46916	0.0339967	0.368151	-3.56643	Q8WUM4	programmed cell death 6 interacting protein [Source:HGNC Symbol;Acc:HGNC:8766]	protein_coding
PCNP	0.161019	16.2951	2.79719	0.01954	0.368151	-3.27401	Q8WW12	PEST proteolytic signal containing nuclear protein [Source:HGNC Symbol;Acc:HGNC:30023]	protein_coding
DNAJA4	-0.383755	13.6415	-2.51077	0.0316914	0.368151	-3.52891	Q8WW22	DnaJ heat shock protein family (Hsp40) member A4 [Source:HGNC Symbol;Acc:HGNC:14885]	protein_coding
MAIP1	-0.241653	15.1327	-2.74605	0.0213007	0.368151	-3.31899	Q8WWC4	matrix AAA peptidase interacting protein 1 [Source:HGNC Symbol;Acc:HGNC:26198]	protein_coding
LZIC	0.408734	13.9437	2.58243	0.0280799	0.368151	-3.46453	Q8WZA0	leucine zipper and CTNNBIP1 domain containing [Source:HGNC Symbol;Acc:HGNC:17497]	protein_coding
H1-10	-0.368246	16.752	-2.80471	0.0192936	0.368151	-3.26741	Q92522	H1.10 linker histone [Source:HGNC Symbol;Acc:HGNC:4722]	protein_coding
HSPH1	0.187477	17.6525	2.46863	0.034027	0.368151	-3.5669	Q92598	heat shock protein family H (Hsp110) member 1 [Source:HGNC Symbol;Acc:HGNC:16969]	protein_coding
NECTIN2	-0.408619	14.5539	-3.30695	0.00832693	0.368151	-2.84291	Q92692	nectin cell adhesion molecule 2 [Source:HGNC Symbol;Acc:HGNC:9707]	protein_coding
HDAC2	-0.140546	17.1692	-2.77974	0.0201234	0.368151	-3.28932	Q92769	histone deacetylase 2 [Source:HGNC Symbol;Acc:HGNC:4853]	protein_coding
RAB8B	-0.193754	16.1065	-3.34642	0.00780099	0.368151	-2.81106	Q92930	RAB8B, member RAS oncogene family [Source:HGNC Symbol;Acc:HGNC:30273]	protein_coding
EMG1	-0.187719	16.2779	-2.93839	0.0154046	0.368151	-3.15124	Q92979	EMG1 N1-specific pseudouridine methyltransferase [Source:HGNC Symbol;Acc:HGNC:16912]	protein_coding
ATP6V0A1	-0.162485	15.5095	-3.07036	0.0123458	0.368151	-3.03869	Q93050	ATPase H+ transporting V0 subunit a1 [Source:HGNC Symbol;Acc:HGNC:865]	protein_coding
LPP	0.177482	17.3228	2.84545	0.018013	0.368151	-3.23179	Q93052	LIM domain containing preferred translocation partner in lipoma [Source:HGNC Symbol;Acc:HGNC:6679]	protein_coding
SCAMP4	-0.243381	17.8674	-2.7833	0.0200031	0.368151	-3.2862	Q969E2	secretory carrier membrane protein 4 [Source:HGNC Symbol;Acc:HGNC:30385]	protein_coding
MYDGF	-0.245119	16.0472	-3.11259	0.0115042	0.368151	-3.00317	Q969H8	myeloid derived growth factor [Source:HGNC Symbol;Acc:HGNC:16948]	protein_coding
ATG2B	-4.53731	7.20751	-2.50523	0.0319893	0.368151	-3.5339	Q96BY7	autophagy related 2B [Source:HGNC Symbol;Acc:HGNC:20187]	protein_coding
DNAJA3	-0.286812	16.4619	-3.35348	0.00771058	0.368151	-2.80538	Q96EY1	DnaJ heat shock protein family (Hsp40) member A3 [Source:HGNC Symbol;Acc:HGNC:11808]	protein_coding
S100A16	0.357209	16.0044	3.10362	0.0116777	0.368151	-3.01068	Q96FQ6	S100 calcium binding protein A16 [Source:HGNC Symbol;Acc:HGNC:20441]	protein_coding
SDSL	0.344588	14.2783	2.62478	0.0261417	0.368151	-3.42666	Q96GA7	serine dehydratase like [Source:HGNC Symbol;Acc:HGNC:30404]	protein_coding
PDLIM5	0.187323	17.0648	2.68336	0.0236787	0.368151	-3.37449	Q96HC4	PDZ and LIM domain 5 [Source:HGNC Symbol;Acc:HGNC:17468]	protein_coding
DHTKD1	-0.353348	13.4324	-2.95971	0.0148626	0.368151	-3.13291	Q96HY7	dehydrogenase E1 and transketolase domain containing 1 [Source:HGNC Symbol;Acc:HGNC:23537]	protein_coding
KIRREL1	-0.306732	13.9045	-2.66126	0.0245793	0.368151	-3.39414	Q96J84	kirre like nephrin family adhesion molecule 1 [Source:HGNC Symbol;Acc:HGNC:15734]	protein_coding
TMX3	-0.218599	16.1644	-3.04888	0.0127978	0.368151	-3.05686	Q96JJ7	thioredoxin related transmembrane protein 3 [Source:HGNC Symbol;Acc:HGNC:24718]	protein_coding
SLC35E1	-0.20634	13.5558	-2.71259	0.0225383	0.368151	-3.34857	Q96K37	solute carrier family 35 member E1 [Source:HGNC Symbol;Acc:HGNC:20803]	protein_coding
CNDP2	0.166413	18.0612	2.63217	0.0258172	0.368151	-3.42006	Q96KP4	carnosine dipeptidase 2 [Source:HGNC Symbol;Acc:HGNC:24437]	protein_coding
ZMAT2	-0.675097	15.1062	-3.45547	0.00651941	0.368151	-2.72432	Q96NC0	zinc finger matrin-type 2 [Source:HGNC Symbol;Acc:HGNC:26433]	protein_coding
IPO9	0.231504	15.4973	2.48143	0.0333001	0.368151	-3.55535	Q96P70	importin 9 [Source:HGNC Symbol;Acc:HGNC:19425]	protein_coding
RBM14	-0.271754	17.7923	-2.79989	0.019451	0.368151	-3.27163	Q96PK6	RNA binding motif protein 14 [Source:HGNC Symbol;Acc:HGNC:14219]	protein_coding
TBCB	0.268133	16.2668	2.91318	0.0160719	0.368151	-3.173	Q99426	tubulin folding cofactor B [Source:HGNC Symbol;Acc:HGNC:1989]	protein_coding
S100A13	0.317981	17.7862	2.52526	0.0309256	0.368151	-3.51586	Q99584	S100 calcium binding protein A13 [Source:HGNC Symbol;Acc:HGNC:10490]	protein_coding
PHB2	-0.179031	18.6823	-2.6954	0.0232023	0.368151	-3.3638	Q99623	prohibitin 2 [Source:HGNC Symbol;Acc:HGNC:30306]	protein_coding
SMAD5	-0.709781	13.4573	-3.26473	0.00893025	0.368151	-2.87725	Q99717	SMAD family member 5 [Source:HGNC Symbol;Acc:HGNC:6771]	protein_coding
ARID3A	-0.354292	18.4377	-2.79741	0.0195327	0.368151	-3.27381	Q99856	AT-rich interaction domain 3A [Source:HGNC Symbol;Acc:HGNC:3031]	protein_coding
DPYSL5	-1.63741	15.0734	-3.00363	0.0138061	0.368151	-3.09532	Q9BPU6	dihydropyrimidinase like 5 [Source:HGNC Symbol;Acc:HGNC:20637]	protein_coding
NIPSNAP1	-0.422866	18.3612	-3.07266	0.0122983	0.368151	-3.03675	Q9BPW8	nipsnap homolog 1 [Source:HGNC Symbol;Acc:HGNC:7827]	protein_coding
MYBBP1A	-0.175472	15.578	-2.54259	0.0300341	0.368151	-3.50028	Q9BQG0	MYB binding protein 1a [Source:HGNC Symbol;Acc:HGNC:7546]	protein_coding
CPPED1	0.271826	16.2119	3.0442	0.0128986	0.368151	-3.06083	Q9BRF8	calcineurin like phosphoesterase domain containing 1 [Source:HGNC Symbol;Acc:HGNC:25632]	protein_coding
ERP44	-0.325654	16.1235	-2.41936	0.0369741	0.368151	-3.61143	Q9BS26	endoplasmic reticulum protein 44 [Source:HGNC Symbol;Acc:HGNC:18311]	protein_coding
NOL10	-0.174573	13.6199	-2.64551	0.025242	0.368151	-3.40816	Q9BSC4	nucleolar protein 10 [Source:HGNC Symbol;Acc:HGNC:25862]	protein_coding
RAMAC	-0.496793	16.7565	-2.88347	0.0168957	0.368151	-3.19872	Q9BTL3	RNA guanine-7 methyltransferase activating subunit [Source:HGNC Symbol;Acc:HGNC:31022]	protein_coding
TMEM43	-0.214348	16.2146	-2.48662	0.0330099	0.368151	-3.55067	Q9BTV4	transmembrane protein 43 [Source:HGNC Symbol;Acc:HGNC:28472]	protein_coding
NDUFAF3	-0.24124	14.8711	-3.08073	0.0121333	0.368151	-3.02994	Q9BU61	NADH:ubiquinone oxidoreductase complex assembly factor 3 [Source:HGNC Symbol;Acc:HGNC:29918]	protein_coding
ISCA1	-0.185728	14.3008	-2.60949	0.0268253	0.368151	-3.44031	Q9BUE6	iron-sulfur cluster assembly 1 [Source:HGNC Symbol;Acc:HGNC:28660]	protein_coding
EFHD1	-0.972372	10.8646	-2.54906	0.0297076	0.368151	-3.49447	Q9BUP0	EF-hand domain family member D1 [Source:HGNC Symbol;Acc:HGNC:29556]	protein_coding
DDX23	-0.172611	15.9572	-2.43507	0.0360081	0.368151	-3.59722	Q9BUQ8	DEAD-box helicase 23 [Source:HGNC Symbol;Acc:HGNC:17347]	protein_coding
DUSP23	0.774654	12.0707	2.63113	0.0258624	0.368151	-3.42098	Q9BVJ7	dual specificity phosphatase 23 [Source:HGNC Symbol;Acc:HGNC:21480]	protein_coding
TARS2	-0.214355	14.6165	-2.55793	0.0292659	0.368151	-3.4865	Q9BW92	threonyl-tRNA synthetase 2, mitochondrial [Source:HGNC Symbol;Acc:HGNC:30740]	protein_coding
RBM4	-0.197316	16.2414	-2.68515	0.0236075	0.368151	-3.3729	Q9BWF3	RNA binding motif protein 4 [Source:HGNC Symbol;Acc:HGNC:9901]	protein_coding
SGPP1	-0.263568	15.3363	-3.27682	0.00875294	0.368151	-2.86739	Q9BX95	sphingosine-1-phosphate phosphatase 1 [Source:HGNC Symbol;Acc:HGNC:17720]	protein_coding
MAK16	-0.279338	14.6488	-2.94947	0.0151204	0.368151	-3.14171	Q9BXY0	MAK16 homolog [Source:HGNC Symbol;Acc:HGNC:13703]	protein_coding
ASPSCR1	0.201847	15.1037	2.73968	0.0215311	0.368151	-3.32462	Q9BZE9	ASPSCR1 tether for SLC2A4, UBX domain containing [Source:HGNC Symbol;Acc:HGNC:13825]	protein_coding
UBE2O	0.17787	14.7163	2.81011	0.0191188	0.368151	-3.26268	Q9C0C9	ubiquitin conjugating enzyme E2 O [Source:HGNC Symbol;Acc:HGNC:29554]	protein_coding
PITHD1	0.337258	15.2526	3.32572	0.00807245	0.368151	-2.82774	Q9GZP4	PITH domain containing 1 [Source:HGNC Symbol;Acc:HGNC:25022]	protein_coding
MFF	-0.23659	16.2041	-2.8088	0.0191609	0.368151	-3.26382	Q9GZY8	mitochondrial fission factor [Source:HGNC Symbol;Acc:HGNC:24858]	protein_coding
TMEM126A	-0.601301	12.9449	-5.11197	0.000513142	0.368151	-1.64768	Q9H061	transmembrane protein 126A [Source:HGNC Symbol;Acc:HGNC:25382]	protein_coding
NAT10	-0.185219	15.9462	-3.07338	0.0122835	0.368151	-3.03614	Q9H0A0	N-acetyltransferase 10 [Source:HGNC Symbol;Acc:HGNC:29830]	protein_coding
QRSL1	-0.311362	13.5038	-2.4939	0.0326067	0.368151	-3.54411	Q9H0R6	glutaminyl-tRNA amidotransferase subunit QRSL1 [Source:HGNC Symbol;Acc:HGNC:21020]	protein_coding
SLK	0.190805	18.7546	2.58781	0.0278261	0.368151	-3.45972	Q9H2G2	STE20 like kinase [Source:HGNC Symbol;Acc:HGNC:11088]	protein_coding
TMEM245	-0.352876	14.0083	-2.65009	0.0250476	0.368151	-3.40408	Q9H330	transmembrane protein 245 [Source:HGNC Symbol;Acc:HGNC:1363]	protein_coding
PTPN23	0.165764	14.1858	2.53158	0.0305977	0.368151	-3.51018	Q9H3S7	protein tyrosine phosphatase non-receptor type 23 [Source:HGNC Symbol;Acc:HGNC:14406]	protein_coding
RPF2	-0.34383	14.9741	-3.80295	0.00371158	0.368151	-2.46079	Q9H7B2	ribosome production factor 2 homolog [Source:HGNC Symbol;Acc:HGNC:20870]	protein_coding
SCAF1	1.01927	11.2055	3.26637	0.00890602	0.368151	-2.87591	Q9H7N4	SR-related CTD associated factor 1 [Source:HGNC Symbol;Acc:HGNC:30403]	protein_coding
WDR54	3.56845	12.6295	6.31359	0.000103247	0.368151	-1.11904	Q9H977	WD repeat domain 54 [Source:HGNC Symbol;Acc:HGNC:25770]	protein_coding
SFXN1	-0.156241	18.1658	-2.59204	0.0276279	0.368151	-3.45593	Q9H9B4	sideroflexin 1 [Source:HGNC Symbol;Acc:HGNC:16085]	protein_coding
POLR1B	-0.265309	14.0388	-2.53774	0.0302813	0.368151	-3.50465	Q9H9Y6	RNA polymerase I subunit B [Source:HGNC Symbol;Acc:HGNC:20454]	protein_coding
CARS2	-0.180789	15.2781	-2.93541	0.0154821	0.368151	-3.15381	Q9HA77	cysteinyl-tRNA synthetase 2, mitochondrial [Source:HGNC Symbol;Acc:HGNC:25695]	protein_coding
UBTD1	-0.236841	14.1486	-2.50881	0.0317965	0.368151	-3.53067	Q9HAC8	ubiquitin domain containing 1 [Source:HGNC Symbol;Acc:HGNC:25683]	protein_coding
GLOD4	0.472544	15.4648	2.9417	0.0153193	0.368151	-3.1484	Q9HC38	glyoxalase domain containing 4 [Source:HGNC Symbol;Acc:HGNC:14111]	protein_coding
CBX8	-0.333295	14.0358	-4.14528	0.00216195	0.368151	-2.221	Q9HC52	chromobox 8 [Source:HGNC Symbol;Acc:HGNC:15962]	protein_coding
MCCC2	-0.17653	15.8558	-3.02198	0.0133879	0.368151	-3.0797	Q9HCC0	methylcrotonyl-CoA carboxylase subunit 2 [Source:HGNC Symbol;Acc:HGNC:6937]	protein_coding
TUFT1	-1.23952	13.7545	-2.87102	0.0172537	0.368151	-3.20953	Q9NNX1	tuftelin 1 [Source:HGNC Symbol;Acc:HGNC:12422]	protein_coding
EXOSC3	-0.55786	14.8918	-3.15001	0.0108075	0.368151	-2.97188	Q9NQT5	exosome component 3 [Source:HGNC Symbol;Acc:HGNC:17944]	protein_coding
HEBP1	0.223749	15.5336	3.36721	0.00753798	0.368151	-2.79438	Q9NRV9	heme binding protein 1 [Source:HGNC Symbol;Acc:HGNC:17176]	protein_coding
KLC4	0.430173	12.7133	2.81822	0.0188592	0.368151	-3.25558	Q9NSK0	kinesin light chain 4 [Source:HGNC Symbol;Acc:HGNC:21624]	protein_coding
ATG3	0.22956	16.0348	2.51232	0.0316086	0.368151	-3.52751	Q9NT62	autophagy related 3 [Source:HGNC Symbol;Acc:HGNC:20962]	protein_coding
AGPAT5	-0.484798	15.1287	-3.02429	0.013336	0.368151	-3.07773	Q9NUQ2	1-acylglycerol-3-phosphate O-acyltransferase 5 [Source:HGNC Symbol;Acc:HGNC:20886]	protein_coding
IMP3	-0.222417	15.4752	-2.43109	0.0362504	0.368151	-3.60082	Q9NV31	IMP U3 small nucleolar ribonucleoprotein 3 [Source:HGNC Symbol;Acc:HGNC:14497]	protein_coding
TMEM30A	-0.171049	15.1192	-2.60105	0.0272104	0.368151	-3.44786	Q9NV96	transmembrane protein 30A [Source:HGNC Symbol;Acc:HGNC:16667]	protein_coding
INTS7	-0.309777	14.011	-3.06353	0.0124877	0.368151	-3.04446	Q9NVH2	integrator complex subunit 7 [Source:HGNC Symbol;Acc:HGNC:24484]	protein_coding
TMLHE	-0.451892	14.3734	-2.48253	0.0332387	0.368151	-3.55437	Q9NVH6	trimethyllysine hydroxylase, epsilon [Source:HGNC Symbol;Acc:HGNC:18308]	protein_coding
ANO10	-0.273017	13.8147	-2.80198	0.0193825	0.368151	-3.2698	Q9NW15	anoctamin 10 [Source:HGNC Symbol;Acc:HGNC:25519]	protein_coding
ARGLU1	-0.664758	14.2595	-2.69275	0.0233062	0.368151	-3.36615	Q9NWB6	arginine and glutamate rich 1 [Source:HGNC Symbol;Acc:HGNC:25482]	protein_coding
CZIB	0.409365	14.3099	4.43197	0.0013918	0.368151	-2.03535	Q9NWV4	CXXC motif containing zinc binding protein [Source:HGNC Symbol;Acc:HGNC:26059]	protein_coding
LYAR	-0.38401	15.3897	-3.09599	0.0118277	0.368151	-3.0171	Q9NX58	Ly1 antibody reactive [Source:HGNC Symbol;Acc:HGNC:26021]	protein_coding
BPNT2	-0.219453	15.25	-2.42066	0.0368932	0.368151	-3.61025	Q9NX62	3'(2'), 5'-bisphosphate nucleotidase 2 [Source:HGNC Symbol;Acc:HGNC:26019]	protein_coding
ZDHHC7	-1.70824	12.1347	-3.08275	0.0120926	0.368151	-3.02825	Q9NXF8	zinc finger DHHC-type palmitoyltransferase 7 [Source:HGNC Symbol;Acc:HGNC:18459]	protein_coding
MRPL39	-0.217161	15.8647	-3.45229	0.0065535	0.368151	-2.72682	Q9NYK5	mitochondrial ribosomal protein L39 [Source:HGNC Symbol;Acc:HGNC:14027]	protein_coding
SACS	0.852851	11.2553	3.65686	0.00469548	0.368151	-2.56915	Q9NZJ4	sacsin molecular chaperone [Source:HGNC Symbol;Acc:HGNC:10519]	protein_coding
CHMP5	0.337865	16.4988	2.95101	0.0150814	0.368151	-3.14039	Q9NZZ3	charged multivesicular body protein 5 [Source:HGNC Symbol;Acc:HGNC:26942]	protein_coding
NDUFAF4	-0.452893	14.3058	-2.42161	0.0368343	0.368151	-3.6094	Q9P032	NADH:ubiquinone oxidoreductase complex assembly factor 4 [Source:HGNC Symbol;Acc:HGNC:21034]	protein_coding
NDUFA13	-0.317881	16.4204	-2.92191	0.0158376	0.368151	-3.16546	Q9P0J0	NADH:ubiquinone oxidoreductase subunit A13 [Source:HGNC Symbol;Acc:HGNC:17194]	protein_coding
CPSF2	-0.168819	14.8408	-2.53584	0.0303783	0.368151	-3.50635	Q9P2I0	cleavage and polyadenylation specific factor 2 [Source:HGNC Symbol;Acc:HGNC:2325]	protein_coding
RCOR3	-0.343492	13.3323	-2.73452	0.0217194	0.368151	-3.32918	Q9P2K3	REST corepressor 3 [Source:HGNC Symbol;Acc:HGNC:25594]	protein_coding
CGN	-0.727894	13.7247	-3.47303	0.00633438	0.368151	-2.71052	Q9P2M7	cingulin [Source:HGNC Symbol;Acc:HGNC:17429]	protein_coding
ORC3	-0.491556	11.3981	-2.86496	0.0174307	0.368151	-3.2148	Q9UBD5	origin recognition complex subunit 3 [Source:HGNC Symbol;Acc:HGNC:8489]	protein_coding
DHCR7	-0.326473	13.4179	-3.54729	0.00561025	0.368151	-2.65274	Q9UBM7	7-dehydrocholesterol reductase [Source:HGNC Symbol;Acc:HGNC:2860]	protein_coding
CLIP2	0.301538	12.5528	3.08914	0.0119639	0.368151	-3.02286	Q9UDT6	CAP-Gly domain containing linker protein 2 [Source:HGNC Symbol;Acc:HGNC:2586]	protein_coding
DNAJB4	1.02512	12.5658	2.8547	0.0177345	0.368151	-3.22373	Q9UDY4	DnaJ heat shock protein family (Hsp40) member B4 [Source:HGNC Symbol;Acc:HGNC:14886]	protein_coding
VTI1B	-0.210637	15.3578	-3.61314	0.00504032	0.368151	-2.60227	Q9UEU0	vesicle transport through interaction with t-SNAREs 1B [Source:HGNC Symbol;Acc:HGNC:17793]	protein_coding
SUN2	-0.262363	15.232	-2.69606	0.0231766	0.368151	-3.36322	Q9UH99	Sad1 and UNC84 domain containing 2 [Source:HGNC Symbol;Acc:HGNC:14210]	protein_coding
ATP5IF1	-0.776688	16.2954	-2.63012	0.0259066	0.368151	-3.42188	Q9UII2	ATP synthase inhibitory factor subunit 1 [Source:HGNC Symbol;Acc:HGNC:871]	protein_coding
RALY	-0.163523	18.1931	-2.7138	0.0224925	0.368151	-3.3475	Q9UKM9	RALY heterogeneous nuclear ribonucleoprotein [Source:HGNC Symbol;Acc:HGNC:15921]	protein_coding
ACAD8	-0.385075	12.6199	-2.45937	0.0345629	0.368151	-3.57527	Q9UKU7	acyl-CoA dehydrogenase family member 8 [Source:HGNC Symbol;Acc:HGNC:87]	protein_coding
CDV3	0.227153	18.2135	2.56138	0.0290963	0.368151	-3.48341	Q9UKY7	CDV3 homolog [Source:HGNC Symbol;Acc:HGNC:26928]	protein_coding
SLC39A10	-0.456592	14.3518	-3.15376	0.0107402	0.368151	-2.96876	Q9ULF5	solute carrier family 39 member 10 [Source:HGNC Symbol;Acc:HGNC:20861]	protein_coding
UBQLN1	0.162798	18.7997	2.45188	0.0350022	0.368151	-3.58203	Q9UMX0	ubiquilin 1 [Source:HGNC Symbol;Acc:HGNC:12508]	protein_coding
DUSP12	0.358587	14.4459	3.2499	0.00915264	0.368151	-2.88937	Q9UNI6	dual specificity phosphatase 12 [Source:HGNC Symbol;Acc:HGNC:3067]	protein_coding
WDR3	-0.302718	14.2641	-2.56484	0.0289268	0.368151	-3.48031	Q9UNX4	WD repeat domain 3 [Source:HGNC Symbol;Acc:HGNC:12755]	protein_coding
COA3	-0.228271	16.1699	-2.82952	0.0185032	0.368151	-3.2457	Q9Y2R0	cytochrome c oxidase assembly factor 3 [Source:HGNC Symbol;Acc:HGNC:24990]	protein_coding
UBE2J1	-0.513786	12.7236	-2.6144	0.0266039	0.368151	-3.43593	Q9Y385	ubiquitin conjugating enzyme E2 J1 [Source:HGNC Symbol;Acc:HGNC:17598]	protein_coding
CHMP3	0.419705	16.1368	2.77463	0.0202978	0.368151	-3.29382	Q9Y3E7	charged multivesicular body protein 3 [Source:HGNC Symbol;Acc:HGNC:29865]	protein_coding
FARP1	-0.499237	13.7399	-3.82928	0.00355853	0.368151	-2.44164	Q9Y4F1	FERM, ARH/RhoGEF and pleckstrin domain protein 1 [Source:HGNC Symbol;Acc:HGNC:3591]	protein_coding
AFG3L2	-0.169913	17.2473	-2.50094	0.0322218	0.368151	-3.53777	Q9Y4W6	AFG3 like matrix AAA peptidase subunit 2 [Source:HGNC Symbol;Acc:HGNC:315]	protein_coding
LRRFIP2	0.397036	14.2175	2.44777	0.0352452	0.368151	-3.58574	Q9Y608	LRR binding FLII interacting protein 2 [Source:HGNC Symbol;Acc:HGNC:6703]	protein_coding
SQOR	-0.195195	18.22	-3.43066	0.00679044	0.368151	-2.74389	Q9Y6N5	sulfide quinone oxidoreductase [Source:HGNC Symbol;Acc:HGNC:20390]	protein_coding
ESYT1	-0.148009	18.2343	-2.41462	0.037271	0.368677	-3.61573	Q9BSJ8	extended synaptotagmin 1 [Source:HGNC Symbol;Acc:HGNC:29534]	protein_coding
TMEM223	-0.336506	14.6656	-2.40042	0.0381733	0.370074	-3.62858	A0PJW6	transmembrane protein 223 [Source:HGNC Symbol;Acc:HGNC:28464]	protein_coding
BIN1	0.193555	16.5391	2.3991	0.0382581	0.370074	-3.62977	O00499	bridging integrator 1 [Source:HGNC Symbol;Acc:HGNC:1052]	protein_coding
ALDH1A1	0.589536	17.0793	2.39763	0.0383528	0.370074	-3.6311	P00352	aldehyde dehydrogenase 1 family member A1 [Source:HGNC Symbol;Acc:HGNC:402]	protein_coding
MARCKSL1	-0.226713	13.5587	-2.39163	0.0387422	0.370074	-3.63654	P49006	MARCKS like 1 [Source:HGNC Symbol;Acc:HGNC:7142]	protein_coding
RAP2B	-0.291638	14.4585	-2.41006	0.0375584	0.370074	-3.61985	P61225	RAP2B, member of RAS oncogene family [Source:HGNC Symbol;Acc:HGNC:9862]	protein_coding
C1QBP	-0.202392	15.8535	-2.40148	0.0381051	0.370074	-3.62762	Q07021	complement C1q binding protein [Source:HGNC Symbol;Acc:HGNC:1243]	protein_coding
BST2	-0.280921	14.3006	-2.39107	0.0387793	0.370074	-3.63705	Q10589	bone marrow stromal cell antigen 2 [Source:HGNC Symbol;Acc:HGNC:1119]	protein_coding
PRPF4B	-0.57091	14.0917	-2.39307	0.0386484	0.370074	-3.63523	Q13523	pre-mRNA processing factor 4B [Source:HGNC Symbol;Acc:HGNC:17346]	protein_coding
MAP1S	0.27698	14.4556	2.40044	0.0381719	0.370074	-3.62856	Q66K74	microtubule associated protein 1S [Source:HGNC Symbol;Acc:HGNC:15715]	protein_coding
LCLAT1	-0.251462	16.2153	-2.39873	0.0382818	0.370074	-3.63011	Q6UWP7	lysocardiolipin acyltransferase 1 [Source:HGNC Symbol;Acc:HGNC:26756]	protein_coding
KIAA2013	-0.340615	13.7016	-2.40611	0.0378093	0.370074	-3.62343	Q8IYS2	KIAA2013 [Source:HGNC Symbol;Acc:HGNC:28513]	protein_coding
GORASP2	0.195356	16.718	2.3906	0.0388094	0.370074	-3.63747	Q9H8Y8	golgi reassembly stacking protein 2 [Source:HGNC Symbol;Acc:HGNC:17500]	protein_coding
TECR	-0.195325	17.4161	-2.39617	0.0384472	0.370074	-3.63242	Q9NZ01	trans-2,3-enoyl-CoA reductase [Source:HGNC Symbol;Acc:HGNC:4551]	protein_coding
DIP2B	0.140671	18.6483	2.38849	0.0389478	0.370074	-3.63938	Q9P265	disco interacting protein 2 homolog B [Source:HGNC Symbol;Acc:HGNC:29284]	protein_coding
ZC2HC1A	0.588995	13.8141	2.38703	0.0390439	0.370323	-3.64071	Q96GY0	zinc finger C2HC-type containing 1A [Source:HGNC Symbol;Acc:HGNC:24277]	protein_coding
RPS12	0.160493	17.9185	2.38101	0.0394415	0.37192	-3.64616	P25398	ribosomal protein S12 [Source:HGNC Symbol;Acc:HGNC:10385]	protein_coding
UBE2V2	0.355806	18.3125	2.37742	0.0396806	0.37192	-3.64942	Q15819	ubiquitin conjugating enzyme E2 V2 [Source:HGNC Symbol;Acc:HGNC:12495]	protein_coding
PI4K2A	-0.190151	13.7331	-2.37708	0.0397033	0.37192	-3.64972	Q9BTU6	phosphatidylinositol 4-kinase type 2 alpha [Source:HGNC Symbol;Acc:HGNC:30031]	protein_coding
DDX52	-0.267745	14.3767	-2.3784	0.0396152	0.37192	-3.64853	Q9Y2R4	DExD-box helicase 52 [Source:HGNC Symbol;Acc:HGNC:20038]	protein_coding
ARFGAP1	0.17217	15.7202	2.37446	0.0398787	0.372905	-3.6521	Q8N6T3	ADP ribosylation factor GTPase activating protein 1 [Source:HGNC Symbol;Acc:HGNC:15852]	protein_coding
ATP5PD	-0.220674	19.4955	-2.37303	0.039975	0.37292	-3.65339	O75947	ATP synthase peripheral stalk subunit d [Source:HGNC Symbol;Acc:HGNC:845]	protein_coding
MRPL55	-0.215169	15.1346	-2.37234	0.040021	0.37292	-3.65401	Q7Z7F7	mitochondrial ribosomal protein L55 [Source:HGNC Symbol;Acc:HGNC:16686]	protein_coding
BCAR3	-0.791477	11.3412	-2.36988	0.040187	0.37381	-3.65624	O75815	BCAR3 adaptor protein, NSP family member [Source:HGNC Symbol;Acc:HGNC:973]	protein_coding
ITGA2	-0.31674	14.3401	-2.35477	0.041222	0.376826	-3.66995	P17301	integrin subunit alpha 2 [Source:HGNC Symbol;Acc:HGNC:6137]	protein_coding
FABP5	0.377473	14.0959	2.35863	0.0409552	0.376826	-3.66645	Q01469	fatty acid binding protein 5 [Source:HGNC Symbol;Acc:HGNC:3560]	protein_coding
SF3A2	-0.210017	16.4693	-2.35597	0.0411384	0.376826	-3.66885	Q15428	splicing factor 3a subunit 2 [Source:HGNC Symbol;Acc:HGNC:10766]	protein_coding
DTD1	0.321894	15.7817	2.35775	0.0410156	0.376826	-3.66724	Q8TEA8	D-aminoacyl-tRNA deacylase 1 [Source:HGNC Symbol;Acc:HGNC:16219]	protein_coding
C20orf27	0.245932	15.1786	2.3578	0.0410124	0.376826	-3.6672	Q9GZN8	chromosome 20 open reading frame 27 [Source:HGNC Symbol;Acc:HGNC:15873]	protein_coding
CSTF2T	-0.168787	14.9804	-2.35567	0.0411593	0.376826	-3.66913	Q9H0L4	cleavage stimulation factor subunit 2 tau variant [Source:HGNC Symbol;Acc:HGNC:17086]	protein_coding
SLTM	-0.24973	15.3882	-2.36019	0.0408477	0.376826	-3.66503	Q9NWH9	SAFB like transcription modulator [Source:HGNC Symbol;Acc:HGNC:20709]	protein_coding
CLDN4	-1.27768	11.914	-2.34222	0.0421008	0.378407	-3.68132	O14493	claudin 4 [Source:HGNC Symbol;Acc:HGNC:2046]	protein_coding
FLOT1	-0.227019	17.0947	-2.33212	0.0428223	0.378407	-3.69049	O75955	flotillin 1 [Source:HGNC Symbol;Acc:HGNC:3757]	protein_coding
GPI	0.176456	18.6952	2.33756	0.0424321	0.378407	-3.68555	P06744	glucose-6-phosphate isomerase [Source:HGNC Symbol;Acc:HGNC:4458]	protein_coding
AKR1A1	0.244466	17.4195	2.33622	0.0425277	0.378407	-3.68677	P14550	aldo-keto reductase family 1 member A1 [Source:HGNC Symbol;Acc:HGNC:380]	protein_coding
NUDT1	0.512897	12.7804	2.34897	0.0416257	0.378407	-3.6752	P36639	nudix hydrolase 1 [Source:HGNC Symbol;Acc:HGNC:8048]	protein_coding
RHOB	-0.663466	14.2295	-2.34356	0.0420062	0.378407	-3.68011	P62745	ras homolog family member B [Source:HGNC Symbol;Acc:HGNC:668]	protein_coding
TUBA4A	0.243925	17.4277	2.34213	0.0421076	0.378407	-3.68141	P68366	tubulin alpha 4a [Source:HGNC Symbol;Acc:HGNC:12407]	protein_coding
SLC7A5	-0.167704	18.5288	-2.33848	0.0423665	0.378407	-3.68472	Q01650	solute carrier family 7 member 5 [Source:HGNC Symbol;Acc:HGNC:11063]	protein_coding
STAM	0.37811	14.8716	2.33218	0.0428175	0.378407	-3.69043	Q92783	signal transducing adaptor molecule [Source:HGNC Symbol;Acc:HGNC:11357]	protein_coding
WNK4	-0.503185	12.455	-2.33889	0.0423377	0.378407	-3.68435	Q96J92	WNK lysine deficient protein kinase 4 [Source:HGNC Symbol;Acc:HGNC:14544]	protein_coding
LLPH	-0.444589	16.0287	-2.33749	0.0424372	0.378407	-3.68562	Q9BRT6	LLP homolog, long-term synaptic facilitation factor [Source:HGNC Symbol;Acc:HGNC:28229]	protein_coding
BAZ1A	-0.669691	11.4796	-2.33349	0.0427238	0.378407	-3.68925	Q9NRL2	bromodomain adjacent to zinc finger domain 1A [Source:HGNC Symbol;Acc:HGNC:960]	protein_coding
RRP7A	-0.379199	13.6838	-2.33578	0.0425593	0.378407	-3.68717	Q9Y3A4	ribosomal RNA processing 7 homolog A [Source:HGNC Symbol;Acc:HGNC:24286]	protein_coding
SF3B6	-0.27237	16.5086	-2.33425	0.0426686	0.378407	-3.68855	Q9Y3B4	splicing factor 3b subunit 6 [Source:HGNC Symbol;Acc:HGNC:30096]	protein_coding
YARS2	-0.161955	16.7563	-2.32589	0.043273	0.380486	-3.69614	Q9Y2Z4	tyrosyl-tRNA synthetase 2 [Source:HGNC Symbol;Acc:HGNC:24249]	protein_coding
CD70	0.993771	19.1126	2.3238	0.0434252	0.38059	-3.69804	P32970	CD70 molecule [Source:HGNC Symbol;Acc:HGNC:11937]	protein_coding
RFK	0.895507	12.7592	2.32375	0.0434283	0.38059	-3.69808	Q969G6	riboflavin kinase [Source:HGNC Symbol;Acc:HGNC:30324]	protein_coding
DBI	0.433585	17.9438	2.32265	0.0435089	0.380667	-3.69908	P07108	diazepam binding inhibitor, acyl-CoA binding protein [Source:HGNC Symbol;Acc:HGNC:2690]	protein_coding
RNF113A	0.17636	12.9214	2.30442	0.0448618	0.381971	-3.71563	O15541	ring finger protein 113A [Source:HGNC Symbol;Acc:HGNC:12974]	protein_coding
HNRNPR	-0.132586	18.5421	-2.30724	0.0446501	0.381971	-3.71307	O43390	heterogeneous nuclear ribonucleoprotein R [Source:HGNC Symbol;Acc:HGNC:5047]	protein_coding
EIF3G	0.173083	16.9205	2.30921	0.0445027	0.381971	-3.71128	O75821	eukaryotic translation initiation factor 3 subunit G [Source:HGNC Symbol;Acc:HGNC:3274]	protein_coding
NDUFB8	-0.340822	15.8329	-2.29896	0.0452747	0.381971	-3.72058	O95169	NADH:ubiquinone oxidoreductase subunit B8 [Source:HGNC Symbol;Acc:HGNC:7703]	protein_coding
APOE	-0.482869	15.4502	-2.31057	0.0444011	0.381971	-3.71005	P02649	apolipoprotein E [Source:HGNC Symbol;Acc:HGNC:613]	protein_coding
GAPDH	0.186436	23.8005	2.31709	0.0439173	0.381971	-3.70413	P04406	glyceraldehyde-3-phosphate dehydrogenase [Source:HGNC Symbol;Acc:HGNC:4141]	protein_coding
JUN	-0.496878	13.7653	-2.29895	0.0452753	0.381971	-3.72059	P05412	Jun proto-oncogene, AP-1 transcription factor subunit [Source:HGNC Symbol;Acc:HGNC:6204]	protein_coding
COL4A2	-0.296807	15.6825	-2.29749	0.045387	0.381971	-3.72192	P08572	collagen type IV alpha 2 chain [Source:HGNC Symbol;Acc:HGNC:2203]	protein_coding
ITGA3	-0.132864	19.2519	-2.31032	0.0444196	0.381971	-3.71027	P26006	integrin subunit alpha 3 [Source:HGNC Symbol;Acc:HGNC:6139]	protein_coding
ALDH4A1	-0.219752	15.2011	-2.29903	0.0452693	0.381971	-3.72052	P30038	aldehyde dehydrogenase 4 family member A1 [Source:HGNC Symbol;Acc:HGNC:406]	protein_coding
TRIM32	1.13311	13.0214	2.30562	0.0447716	0.381971	-3.71454	Q13049	tripartite motif containing 32 [Source:HGNC Symbol;Acc:HGNC:16380]	protein_coding
CBFB	0.4002	15.5118	2.29775	0.045367	0.381971	-3.72168	Q13951	core-binding factor subunit beta [Source:HGNC Symbol;Acc:HGNC:1539]	protein_coding
GLT8D1	-0.492341	11.9967	-2.30821	0.0445774	0.381971	-3.71219	Q68CQ7	glycosyltransferase 8 domain containing 1 [Source:HGNC Symbol;Acc:HGNC:24870]	protein_coding
THEM6	-0.499518	14.0836	-2.30812	0.0445836	0.381971	-3.71226	Q8WUY1	thioesterase superfamily member 6 [Source:HGNC Symbol;Acc:HGNC:29656]	protein_coding
PBXIP1	-0.380908	13.9561	-2.30427	0.0448729	0.381971	-3.71576	Q96AQ6	PBX homeobox interacting protein 1 [Source:HGNC Symbol;Acc:HGNC:21199]	protein_coding
TEX10	-0.185562	14.1206	-2.31544	0.0440394	0.381971	-3.70563	Q9NXF1	testis expressed 10 [Source:HGNC Symbol;Acc:HGNC:25988]	protein_coding
SNX3	0.134702	17.6476	2.29597	0.0455024	0.382336	-3.72329	O60493	sorting nexin 3 [Source:HGNC Symbol;Acc:HGNC:11174]	protein_coding
LDHB	0.150943	19.1941	2.2926	0.0457606	0.383896	-3.72635	P07195	lactate dehydrogenase B [Source:HGNC Symbol;Acc:HGNC:6541]	protein_coding
BAG2	-0.186039	16.3475	-2.2908	0.0458994	0.384129	-3.72799	O95816	BAG cochaperone 2 [Source:HGNC Symbol;Acc:HGNC:938]	protein_coding
RARS2	-0.274242	14.1033	-2.29036	0.0459331	0.384129	-3.72839	Q5T160	arginyl-tRNA synthetase 2, mitochondrial [Source:HGNC Symbol;Acc:HGNC:21406]	protein_coding
ATP5F1A	-0.163043	21.447	-2.28411	0.0464173	0.385805	-3.73406	P25705	ATP synthase F1 subunit alpha [Source:HGNC Symbol;Acc:HGNC:823]	protein_coding
SBDS	0.471023	15.0184	2.28379	0.0464424	0.385805	-3.73435	Q9Y3A5	SBDS ribosome maturation factor [Source:HGNC Symbol;Acc:HGNC:19440]	protein_coding
MGAT2	-0.188144	14.7657	-2.28049	0.0466998	0.386275	-3.73735	Q10469	alpha-1,6-mannosyl-glycoprotein 2-beta-N-acetylglucosaminyltransferase [Source:HGNC Symbol;Acc:HGNC:7045]	protein_coding
TMEM87A	0.273447	12.7135	2.28108	0.0466534	0.386275	-3.73681	Q8NBN3	transmembrane protein 87A [Source:HGNC Symbol;Acc:HGNC:24522]	protein_coding
ALDH3B1	-0.306685	15.273	-2.27741	0.0469414	0.387591	-3.74014	P43353	aldehyde dehydrogenase 3 family member B1 [Source:HGNC Symbol;Acc:HGNC:410]	protein_coding
SQSTM1	0.158309	17.3608	2.27107	0.0474437	0.387591	-3.7459	Q13501	sequestosome 1 [Source:HGNC Symbol;Acc:HGNC:11280]	protein_coding
BLMH	0.194171	16.9807	2.27645	0.0470171	0.387591	-3.74101	Q13867	bleomycin hydrolase [Source:HGNC Symbol;Acc:HGNC:1059]	protein_coding
NDUFAF7	-0.437801	14.6467	-2.2724	0.047338	0.387591	-3.74469	Q7L592	NADH:ubiquinone oxidoreductase complex assembly factor 7 [Source:HGNC Symbol;Acc:HGNC:28816]	protein_coding
EPB41L5	-0.463629	13.5073	-2.27242	0.0473359	0.387591	-3.74467	Q9HCM4	erythrocyte membrane protein band 4.1 like 5 [Source:HGNC Symbol;Acc:HGNC:19819]	protein_coding
ATAD3A	-0.194837	15.7034	-2.27146	0.0474126	0.387591	-3.74555	Q9NVI7	ATPase family AAA domain containing 3A [Source:HGNC Symbol;Acc:HGNC:25567]	protein_coding
NCDN	1.05656	11.9997	2.27488	0.0471414	0.387591	-3.74244	Q9UBB6	neurochondrin [Source:HGNC Symbol;Acc:HGNC:17597]	protein_coding
PNPT1	-0.17974	16.3112	-2.2697	0.0475526	0.387883	-3.74714	Q8TCS8	polyribonucleotide nucleotidyltransferase 1 [Source:HGNC Symbol;Acc:HGNC:23166]	protein_coding
EXOC8	-0.255947	16.3464	-2.26704	0.0477652	0.388763	-3.74956	Q8IYI6	exocyst complex component 8 [Source:HGNC Symbol;Acc:HGNC:24659]	protein_coding
MTLN	-0.91212	12.9367	-2.26652	0.0478071	0.388763	-3.75003	Q8NCU8	mitoregulin [Source:HGNC Symbol;Acc:HGNC:27339]	protein_coding
NAE1	0.165193	15.7748	2.26055	0.0482875	0.390856	-3.75545	Q13564	NEDD8 activating enzyme E1 subunit 1 [Source:HGNC Symbol;Acc:HGNC:621]	protein_coding
DECR1	-0.191563	17.6527	-2.26056	0.048287	0.390856	-3.75544	Q16698	2,4-dienoyl-CoA reductase 1 [Source:HGNC Symbol;Acc:HGNC:2753]	protein_coding
PHLDA2	0.461097	11.7463	2.25768	0.0485199	0.390856	-3.75805	Q53GA4	pleckstrin homology like domain family A member 2 [Source:HGNC Symbol;Acc:HGNC:12385]	protein_coding
DHRS4	-0.206379	16.3249	-2.26027	0.0483098	0.390856	-3.7557	Q9BTZ2	dehydrogenase/reductase 4 [Source:HGNC Symbol;Acc:HGNC:16985]	protein_coding
PGAM5	-0.178164	16.7133	-2.25579	0.0486745	0.390961	-3.75977	Q96HS1	PGAM family member 5, mitochondrial serine/threonine protein phosphatase [Source:HGNC Symbol;Acc:HGNC:28763]	protein_coding
LSS	-0.170425	14.9719	-2.24951	0.0491889	0.391591	-3.76547	P48449	lanosterol synthase [Source:HGNC Symbol;Acc:HGNC:6708]	protein_coding
UBE2N	0.231627	18.2452	2.25106	0.0490616	0.391591	-3.76407	P61088	ubiquitin conjugating enzyme E2 N [Source:HGNC Symbol;Acc:HGNC:12492]	protein_coding
PGM2	0.199862	15.4277	2.25031	0.0491234	0.391591	-3.76475	Q96G03	phosphoglucomutase 2 [Source:HGNC Symbol;Acc:HGNC:8906]	protein_coding
MRPL47	-0.230436	14.6173	-2.25099	0.049067	0.391591	-3.76413	Q9HD33	mitochondrial ribosomal protein L47 [Source:HGNC Symbol;Acc:HGNC:16652]	protein_coding
NSFL1C	0.121153	17.3981	2.25112	0.0490566	0.391591	-3.76401	Q9UNZ2	NSFL1 cofactor [Source:HGNC Symbol;Acc:HGNC:15912]	protein_coding
EIF2D	0.332424	14.7478	2.24433	0.0496179	0.391895	-3.77018	P41214	eukaryotic translation initiation factor 2D [Source:HGNC Symbol;Acc:HGNC:6583]	protein_coding
YWHAZ	0.220736	21.0967	2.24579	0.049496	0.391895	-3.76885	P63104	tyrosine 3-monooxygenase/tryptophan 5-monooxygenase activation protein zeta [Source:HGNC Symbol;Acc:HGNC:12855]	protein_coding
TXLNG	-0.290522	13.3501	-2.2469	0.0494045	0.391895	-3.76784	Q9NUQ3	taxilin gamma [Source:HGNC Symbol;Acc:HGNC:18578]	protein_coding
