# Supplementary material for: Novel Iron Chelator SK4 Drives Cytotoxicity through Inhibiting Mitochondrial Metabolism in Ovarian and Triple Negative Breast Cancer Cell Lines
Source: Biomedicines. 2023 Jul 24;11(7):2073. doi: 10.3390/biomedicines11072073 (PMC10377004; doi:10.3390/biomedicines11072073)
Supplement: Supplementary file 1 [file biomedicines-11-02073-s001.zip › Table S3.csv]

Gene	logFC _ MDA	AveExpr _MDA	t _ MDA	P.Value _MDA	adj.P.Val _MDA	B _MDA	logFC _SKOV3	AveExpr _SKOV3	t_SKOV3	P.Value _SKOV3	adj.P.Val _SKOV3	B _SKOV3														description
SDHB	-0.951841115	16.40100873	-9.990499514	1.12E-05	0.005367524	3.969760464	-0.354585075	16.21069345	-3.624315558	0.004949713	0.368151418	-2.59377021														adenylate kinase 4 [Source:HGNC Symbol;Acc:HGNC:363]
MAK16	-1.012576578	14.00424934	-8.714882914	2.97E-05	0.010618137	3.069224951	-0.279338455	14.64878445	-2.949474894	0.015120374	0.368151418	-3.141707122														AXL receptor tyrosine kinase [Source:HGNC Symbol;Acc:HGNC:905]
NDUFS4	-0.634902717	13.68046606	-7.577005483	7.89E-05	0.017610855	2.133916197	-0.353334236	14.65818739	-2.978499819	0.014400895	0.368151418	-3.116802245														bromodomain adjacent to zinc finger domain 1A [Source:HGNC Symbol;Acc:HGNC:960]
AK4	0.692953587	16.33845067	6.636240627	0.000193797	0.033898444	1.248986633	-0.197768402	16.64423714	-2.56020404	0.029153948	0.368151418	-3.484466143														collagen type IV alpha 2 chain [Source:HGNC Symbol;Acc:HGNC:2203]
AXL	-0.509578705	16.48464728	-6.076802378	0.000346161	0.045516887	0.668175844	-0.233415222	16.93739548	-4.064322693	0.002453278	0.368151418	-2.275917107														cysteine and glycine rich protein 2 [Source:HGNC Symbol;Acc:HGNC:2470]
MAP2K1	0.318624493	15.5435524	5.104295966	0.001041502	0.079309039	-0.449330734	0.251072311	15.05171413	2.675944094	0.023977283	0.368151418	-3.38107742														dihydrofolate reductase [Source:HGNC Symbol;Acc:HGNC:2861]
CSRP2	0.713395358	15.03476655	5.014771857	0.001160085	0.084766736	-0.559469665	0.180032921	15.45593729	2.416853409	0.037130865	0.368151418	-3.61370246														dehydrogenase/reductase 4 [Source:HGNC Symbol;Acc:HGNC:16985]
NDUFA13	-0.740120887	15.57165718	-4.789924664	0.001528599	0.099527758	-0.841644373	-0.317881393	16.42040157	-2.921909056	0.015837565	0.368151418	-3.165455837														dehydrogenase E1 and transketolase domain containing 1 [Source:HGNC Symbol;Acc:HGNC:23537]
PDCD5	0.297929765	18.80344915	4.790429704	0.00152764	0.099527758	-0.841001644	0.230348969	18.08185806	3.226348287	0.009517749	0.368151418	-2.9086966														DEAH-box helicase 37 [Source:HGNC Symbol;Acc:HGNC:17210]
YARS2	-0.386560678	14.37914836	-4.693369126	0.001724701	0.106748835	-0.965262542	-0.161955261	16.75629959	-2.325886098	0.043272957	0.380486269	-3.696143934														endoplasmic reticulum protein 29 [Source:HGNC Symbol;Acc:HGNC:13799]
NDUFAF3	-0.55675793	14.49189901	-4.546480102	0.002077761	0.12012197	-1.156137651	-0.241240311	14.87113419	-3.08073335	0.012133336	0.368151418	-3.029942166														exostosin glycosyltransferase 1 [Source:HGNC Symbol;Acc:HGNC:3512]
COL4A2	0.945246457	13.42479098	4.412410888	0.002469583	0.13257631	-1.333308066	-0.296806908	15.68252478	-2.297485124	0.045386984	0.38197109	-3.72191878														glucose-6-phosphate isomerase [Source:HGNC Symbol;Acc:HGNC:4458]
NDUFAF4	-0.621447085	14.14202094	-4.145905695	0.003509174	0.16272598	-1.693750594	-0.452892685	14.30578041	-2.421611721	0.03683434	0.368151418	-3.609397074														general transcription factor IIi [Source:HGNC Symbol;Acc:HGNC:4659]
MRPS15	-0.67618537	14.2307576	-4.070644359	0.003882607	0.171650386	-1.797491851	-0.324006844	14.08802843	-3.035040037	0.013097944	0.368151418	-3.068594731														H1.10 linker histone [Source:HGNC Symbol;Acc:HGNC:4722]
H1-10	-0.785399915	15.31647205	-4.023047243	0.004140823	0.177112758	-1.86353432	-0.36824646	16.75197372	-2.804710897	0.019293577	0.368151418	-3.267409799														H4 clustered histone 1 [Source:HGNC Symbol;Acc:HGNC:4781]
RGS10	0.339423183	16.53627253	3.989581002	0.004333462	0.179750798	-1.9101688	0.239128494	14.56115723	2.494762014	0.032559471	0.368151418	-3.543331599														heterogeneous nuclear ribonucleoprotein R [Source:HGNC Symbol;Acc:HGNC:5047]
H4C1	-0.348568437	23.83870149	-3.853455767	0.005222746	0.194871398	-2.101518855	-0.317999268	23.86883812	-3.055149188	0.012664116	0.368151418	-3.051549736														hypoxanthine phosphoribosyltransferase 1 [Source:HGNC Symbol;Acc:HGNC:5157]
LLPH	-0.4254539	15.89054072	-3.842343696	0.005303569	0.196493479	-2.11725477	-0.444589424	16.02873888	-2.337490057	0.042437202	0.378406754	-3.685616406														isocitrate dehydrogenase (NADP(+)) 1 [Source:HGNC Symbol;Acc:HGNC:5382]
UQCRQ	-0.21331406	16.49183273	-3.807731914	0.005564056	0.200892996	-2.166378656	-0.189162064	16.51439114	-2.928168648	0.015671727	0.368151418	-3.160054963														isopentenyl-diphosphate delta isomerase 1 [Source:HGNC Symbol;Acc:HGNC:5387]
PHLDA2	0.408570053	14.59818828	3.808110036	0.005561137	0.200892996	-2.165841102	0.461096954	11.7462986	2.257684609	0.048519926	0.390856014	-3.758050545														integrin subunit alpha 2 [Source:HGNC Symbol;Acc:HGNC:6137]
UBE4B	-0.235585927	13.38812721	-3.775079219	0.005822442	0.205583007	-2.212872977	0.428982353	13.67663145	3.320654428	0.008140308	0.368151418	-2.831825676														integrin subunit beta 4 [Source:HGNC Symbol;Acc:HGNC:6158]
MPZL1	-1.258647678	12.71378791	-3.667867351	0.006765508	0.214457366	-2.366539237	-1.522998428	14.07258854	-2.494727172	0.032561385	0.368151418	-3.543363005														Jun proto-oncogene, AP-1 transcription factor subunit [Source:HGNC Symbol;Acc:HGNC:6204]
GTF2I	-0.230019093	18.20804858	-3.599938693	0.007446873	0.229001307	-2.46467517	-0.191331482	18.99219704	-2.731859932	0.021817052	0.368151418	-3.331524198														LLP homolog, long-term synaptic facilitation factor [Source:HGNC Symbol;Acc:HGNC:28229]
MFGE8	-0.283663507	14.3934592	-3.586384612	0.007591416	0.229531263	-2.484326226	-0.242642784	14.11572046	-2.66224829	0.024538367	0.368151418	-3.393256751														lanosterol synthase [Source:HGNC Symbol;Acc:HGNC:6708]
WDR3	-0.431102038	14.55370462	-3.52607084	0.008271953	0.230396286	-2.572043882	-0.302717781	14.26408854	-2.564836112	0.028926786	0.368151418	-3.480309617														LYR motif containing 7 [Source:HGNC Symbol;Acc:HGNC:28072]
SLC39A10	0.803297282	12.94085395	3.540985315	0.008097815	0.230396286	-2.550311916	-0.456592369	14.35181189	-3.153758678	0.010740213	0.368151418	-2.968761607														MAK16 homolog [Source:HGNC Symbol;Acc:HGNC:13703]
MRPS9	-0.300943137	14.5209223	-3.421148573	0.009615746	0.253244737	-2.725660646	-0.28237133	14.78166151	-2.46175313	0.034424083	0.368151418	-3.573113049														mitogen-activated protein kinase kinase 1 [Source:HGNC Symbol;Acc:HGNC:6840]
JUN	0.35882282	15.36315608	3.304688641	0.011383809	0.276496063	-2.89758456	-0.496878242	13.76533594	-2.29895281	0.045275306	0.38197109	-3.720586572														milk fat globule EGF and factor V/VIII domain containing [Source:HGNC Symbol;Acc:HGNC:7036]
GPI	0.29573059	18.91567135	3.276345694	0.011864299	0.282434737	-2.939634441	0.17645607	18.69519787	2.337561117	0.042432133	0.378406754	-3.685551946														myelin protein zero like 1 [Source:HGNC Symbol;Acc:HGNC:7226]
HPRT1	0.193655495	17.73595262	3.17311521	0.01380385	0.305134674	-3.093417265	0.303786087	17.56363659	2.45201645	0.034993999	0.368151418	-3.581907723														mitochondrial ribosomal protein S15 [Source:HGNC Symbol;Acc:HGNC:14504]
DHRS4	0.23371458	15.00020981	3.173439016	0.013797267	0.305134674	-3.092933433	-0.206379318	16.32486744	-2.260274992	0.048309769	0.390856014	-3.755698794														mitochondrial ribosomal protein S9 [Source:HGNC Symbol;Acc:HGNC:14501]
PRPF4B	-0.349313022	14.75723135	-3.136192273	0.01457656	0.314386588	-3.148643751	-0.570909882	14.09171619	-2.393073371	0.038648379	0.370074351	-3.63523103														NADH:ubiquinone oxidoreductase subunit A13 [Source:HGNC Symbol;Acc:HGNC:17194]
EXT1	-0.506321908	12.07034778	-3.067555288	0.016136477	0.332408433	-3.251584293	-0.43873539	11.17900267	-2.490072153	0.032818166	0.368151418	-3.547559549														NADH:ubiquinone oxidoreductase complex assembly factor 3 [Source:HGNC Symbol;Acc:HGNC:29918]
TMEM223	-0.247405767	14.11514604	-2.938873243	0.019551922	0.362192472	-3.445413796	-0.336506081	14.66562777	-2.400417244	0.03817333	0.370074351	-3.628580415														NADH:ubiquinone oxidoreductase complex assembly factor 4 [Source:HGNC Symbol;Acc:HGNC:21034]
DHFR	0.213215115	15.93473041	2.945528779	0.01935792	0.362192472	-3.435366049	0.308653259	16.55456161	2.58236434	0.028083029	0.368151418	-3.464593997														NADH:ubiquinone oxidoreductase subunit S4 [Source:HGNC Symbol;Acc:HGNC:7711]
HNRNPR	-0.170084955	18.68724632	-2.883292558	0.021253439	0.369024233	-3.529402264	-0.132585526	18.54207516	-2.307235681	0.044650069	0.38197109	-3.713068685														programmed cell death 5 [Source:HGNC Symbol;Acc:HGNC:8764]
RNF113A	0.39695525	13.45981514	2.84948347	0.022363276	0.37704047	-3.580552244	0.17635994	12.92138977	2.304418713	0.044861758	0.38197109	-3.715625401														pleckstrin homology like domain family A member 2 [Source:HGNC Symbol;Acc:HGNC:12385]
WDR46	-0.245412825	14.90818906	-2.812071562	0.02366189	0.389244104	-3.637196255	-0.278617859	14.93897228	-2.846304451	0.017987192	0.368151418	-3.231050539														protein phosphatase 2 scaffold subunit Abeta [Source:HGNC Symbol;Acc:HGNC:9303]
LSS	-0.19701743	15.27409852	-2.804306221	0.023941109	0.392380612	-3.648958301	-0.170424843	14.97188196	-2.249510796	0.049188911	0.391591	-3.765471325														pre-mRNA processing factor 4B [Source:HGNC Symbol;Acc:HGNC:17346]
RIPK2	-1.746494533	12.42549336	-2.799091732	0.024130524	0.393045126	-3.656857431	0.405894661	15.34493246	2.663223844	0.024497969	0.368151418	-3.392388692														receptor accessory protein 3 [Source:HGNC Symbol;Acc:HGNC:23711]
DHX37	-0.244403362	12.96375108	-2.781965854	0.024763621	0.400475916	-3.682804701	-0.2793293	13.93654327	-3.083914088	0.012068958	0.368151418	-3.027262002														regulator of G protein signaling 10 [Source:HGNC Symbol;Acc:HGNC:9992]
SPATS2	0.45877933	12.55097723	2.772145379	0.025134398	0.403146541	-3.697686281	0.154631424	14.53936081	2.588096763	0.027812447	0.368151418	-3.459458975														receptor interacting serine/threonine kinase 2 [Source:HGNC Symbol;Acc:HGNC:10020]
REEP3	0.237889288	14.12157059	2.72054065	0.027179384	0.406228724	-3.775909586	-0.253615189	13.89661579	-2.535588631	0.030391244	0.368151418	-3.506577653														ring finger protein 113A [Source:HGNC Symbol;Acc:HGNC:12974]
LYRM7	-0.851173878	13.11003685	-2.657183362	0.029927134	0.415125987	-3.871969294	-0.590001869	12.92581568	-3.634678776	0.004867237	0.368151418	-2.585910192														succinate dehydrogenase complex iron sulfur subunit B [Source:HGNC Symbol;Acc:HGNC:10681]
DHTKD1	-0.275011775	13.14292419	-2.595026002	0.032901169	0.422592173	-3.966181556	-0.353347588	13.43235922	-2.959708703	0.014862607	0.368151418	-3.132914044														solute carrier family 39 member 10 [Source:HGNC Symbol;Acc:HGNC:20861]
IDH1	-0.35894418	16.39456785	-2.547948715	0.035354139	0.427778066	-4.03748332	0.232949448	17.62683239	2.561615293	0.029084551	0.368151418	-3.483199624														spermatogenesis associated serine rich 2 [Source:HGNC Symbol;Acc:HGNC:18650]
TUBA4A	0.24531889	16.5453732	2.546928309	0.035409331	0.427778066	-4.039028061	0.243924713	17.42773895	2.342128502	0.042107566	0.378406754	-3.681408937														Sad1 and UNC84 domain containing 2 [Source:HGNC Symbol;Acc:HGNC:14210]
ITGA2	-0.21009684	17.17374349	-2.524585487	0.03664012	0.435132446	-4.072842348	-0.316740036	14.34012222	-2.354768149	0.041221997	0.376825911	-3.669945949														transmembrane protein 223 [Source:HGNC Symbol;Acc:HGNC:28464]
SUN2	-0.379097223	15.61006701	-2.509516845	0.037494766	0.4387839	-4.095636612	-0.262362862	15.23200235	-2.696055783	0.023176598	0.368151418	-3.363221888														tubulin alpha 4a [Source:HGNC Symbol;Acc:HGNC:12407]
ERP29	0.180838585	19.97531223	2.422060029	0.04287147	0.452694889	-4.227705927	-0.207325363	19.75773296	-2.549850324	0.029668151	0.368151418	-3.493761977														ubiquitination factor E4B [Source:HGNC Symbol;Acc:HGNC:12500]
IDI1	-0.38295555	14.38841629	-2.375344027	0.046057342	0.468632279	-4.298050302	0.431237411	13.63537865	2.597139343	0.027390898	0.368151418	-3.451363505														ubiquinol-cytochrome c reductase complex III subunit VII [Source:HGNC Symbol;Acc:HGNC:29594]
PPP2R1B	-0.146264077	13.88632464	-2.370884561	0.046373699	0.468632279	-4.304756425	0.416208649	12.83369064	3.326254481	0.008065291	0.368151418	-2.827303365														WD repeat domain 3 [Source:HGNC Symbol;Acc:HGNC:12755]
ITGB4	0.284130573	17.24558902	2.367319209	0.046628203	0.469294424	-4.310116792	-0.368342209	15.73900414	-2.807035068	0.019218109	0.368151418	-3.265373233														WD repeat domain 46 [Source:HGNC Symbol;Acc:HGNC:13923]
BAZ1A	-0.471448663	11.99418962	-2.338929163	0.048705639	0.476889239	-4.352760619	-0.669690514	11.4795907	-2.33348627	0.042723767	0.378406754	-3.689248515														tyrosyl-tRNA synthetase 2 [Source:HGNC Symbol;Acc:HGNC:24249]
