# Supplementary material for: Novel Iron Chelator SK4 Drives Cytotoxicity through Inhibiting Mitochondrial Metabolism in Ovarian and Triple Negative Breast Cancer Cell Lines
Source: Biomedicines. 2023 Jul 24;11(7):2073. doi: 10.3390/biomedicines11072073 (PMC10377004; doi:10.3390/biomedicines11072073)
Supplement: Supplementary file 1 [file biomedicines-11-02073-s001.zip › Table S4.xlsx]

## Sheet: Metabolomic (raw data)
Name		1,3-di-o-Tolylguanidine	1-Aminocyclohexanecarboxylic acid	1-Methylhistidine	1-Methylnicotinamide	2,2,6,6-Tetramethyl-4-piperidinol	2,4-Diaminotoluene	2,4-Dimethylbenzaldehyde	2-Amino-4-methylpyrimidine	3-Hydroxy-2-methylpyridine	4-Methyl-5-thiazoleethanol	5-Hydroxyindole-3-acetic acid	8-Hydroxyquinoline	Acetylcholine	Acetyl-L-carnitine	Adenosine 5'-monophosphate	Adenosine diphosphate (ADP)	Aniline	Argininosuccinic acid	Asparagine	Aspartame	Bis(4-ethylbenzylidene)sorbitol	Caprolactam	Choline	Creatine	Cysteinylglycine	Cytidine 5'-diphosphocholine	Cytosine	D-(-)-Aspartic acid	D-Carnitine	Decanamide	Didecyldimethylammonium	DL-Arginine	DL-Carnitine	DL-Glutamine	DL-Serine	Erucamide	Ethylenediaminetetraacetic acid (EDTA)	Ethyltriglycol	Glucose 1-phosphate	Glycylglycine	Glycylproline	Guanine	Hexamethylenetetramine	Hexanoylcarnitine	Hypoxanthine	Inosine	Inosine-5'-monophosphate (IMP)	Isoleucine
Formula		C15 H17 N3	C7 H13 N O2	C7 H11 N3 O2	C7 H8 N2 O	C9 H19 N O	C7 H10 N2	C9 H10 O	C5 H7 N3	C6 H7 N O	C6 H9 N O S	C10 H9 N O3	C9 H7 N O	C7 H15 N O2	C9 H17 N O4	C10 H14 N5 O7 P	C10 H15 N5 O10 P2	C6 H7 N	C10 H18 N4 O6	C4 H8 N2 O3	C14 H18 N2 O5	C24 H30 O6	C6 H11 N O	C5 H13 N O	C4 H9 N3 O2	C5 H10 N2 O3 S	C14 H26 N4 O11 P2	C4 H5 N3 O	C4 H7 N O4	C7 H15 N O3	C10 H21 N O	C22 H47 N	C6 H14 N4 O2	C7 H15 N O3	C5 H10 N2 O3	C3 H7 N O3	C22 H43 N O	C10 H16 N2 O8	C8 H18 O4	C6 H13 O9 P	C4 H8 N2 O3	C7 H12 N2 O3	C5 H5 N5 O	C6 H12 N4	C13 H25 N O4	C5 H4 N4 O	C10 H12 N4 O5	C10 H13 N4 O8 P	C6 H13 N O2
Annot. DeltaMass [ppm]		-4.14	-6.65	-6.37	-7.84	-6.47	-7.45	-6.62	-6.87	-6.72	-5.99	-7.41	-6.23	-6.27	-7.35	-6.42	-6.34	-7.2	-6.45	-6.67	-7.05	-6.94	-7.52	-8.41	-6.81	-6.72	-5.4	-6.61	-6.97	-7.23	-6.48	-6.5	-6.37	-7.39	-6.7	-8.48	-5.61	-6.89	-6.93	-6.99	-6.64	-7.3	-7.22	-8.1	-7.25	-7.37	-6.8	-6.59	-7.26
Calc. MW		239.141	143.094	169.084	136.063	157.146	122.083	134.072	109.063	109.052	143.04	191.057	145.052	145.109	203.114	347.061	427.027	93.0572	290.121	132.053	294.12	414.201	113.083	103.099	131.069	178.04	488.105	111.043	133.037	161.104	171.161	325.369	174.111	161.104	146.068	105.042	337.333	292.089	178.119	260.028	132.053	172.084	151.048	140.105	259.176	136.038	268.079	348.045	131.094
m/z		240.149	144.101	170.091	137.07	158.153	123.091	135.08	110.071	110.059	144.047	209.091	146.059	146.117	204.122	348.068	428.034	94.0645	291.128	133.06	295.127	415.209	131.117	104.106	132.076	179.047	489.112	112.05	134.044	162.111	172.168	326.376	175.118	162.111	130.049	106.049	338.34	293.096	179.127	261.035	133.06	173.091	152.056	141.112	260.184	137.045	269.086	349.052	132.101
RT [min]		2.573	7.482	11.186	6.908	4.296	3.538	1.822	11.945	2.511	8.155	7.622	2.521	8.163	7.548	11.122	12.856	7.617	12.942	10.724	9.608	1.822	7.567	5.049	9.825	11.208	12.667	9.942	11.532	9.138	1.836	2.033	12.417	8.489	10.524	10.599	1.726	11.85	2.004	12.066	11.295	10.26	6.28	7.713	3.889	4.038	5.44	11.466	7.152
# mzCloud Results		1	2	2	5	2	2	6	1	5	1	1	13	1	1	2	1	8	1	1	1	2	1	1	1	1	1	2	2	3	1	1	2	3	3	3	5	1	1	2	1	2	1	1	1	2	1	1	4
mzCloud Best Match		92.5	92.9	91.4	93.1	99.7	81.2	97.8	71	99.1	98	79.7	96.7	73.9	96.8	99.5	97.2	81.1	98.5	93.6	75.1	98.2	71.2	87.1	95	93.1	96.8	75	99.7	99.7	79.9	99.9	88.8	76.4	98.5	99.7	97.3	98.2	76.9	99.2	95.1	93.7	76.4	96.7	99.5	94.4	100	99.7	99.8
# Adducts		1	1	1	1	1	1	1	1	1	1	2	1	2	1	2	1	1	2	1	1	5	2	2	3	1	1	1	1	4	1	1	1	1	3	2	1	2	1	3	1	2	1	1	1	6	5	1	1
MS2		DDA for preferred ion	DDA for preferred ion	DDA for preferred ion	DDA for preferred ion	DDA for preferred ion	DDA for preferred ion	DDA for preferred ion	DDA for preferred ion	DDA for preferred ion	DDA for preferred ion	DDA for preferred ion	DDA for preferred ion	DDA for preferred ion	DDA for preferred ion	DDA for preferred ion	DDA for preferred ion	DDA for preferred ion	DDA for preferred ion	DDA for preferred ion	DDA for preferred ion	DDA for preferred ion	DDA for preferred ion	DDA for preferred ion	DDA for preferred ion	DDA for preferred ion	DDA for preferred ion	DDA for preferred ion	DDA for preferred ion	DDA for preferred ion	DDA for preferred ion	DDA for preferred ion	DDA for preferred ion	DDA for preferred ion	DDA for preferred ion	DDA for preferred ion	DDA for preferred ion	DDA for preferred ion	DDA for preferred ion	DDA for preferred ion	DDA for preferred ion	DDA for preferred ion	DDA for preferred ion	DDA for preferred ion	DDA for preferred ion	DDA for preferred ion	DDA for preferred ion	DDA for preferred ion	DDA for preferred ion
MS Depth		2	2	2	2	2	2	2	2	2	2	2	2	2	2	2	2	2	2	2	2	2	2	2	2	2	2	2	2	2	2	2	2	2	2	2	2	2	2	2	2	2	2	2	2	2	2	2	2
Reference Ion		[M+H]+1	[M+H]+1	[M+H]+1	[M+H]+1	[M+H]+1	[M+H]+1	[M+H]+1	[M+H]+1	[M+H]+1	[M+H]+1	[M+NH4]+1	[M+H]+1	[M+H]+1	[M+H]+1	[M+H]+1	[M+H]+1	[M+H]+1	[M+H]+1	[M+H]+1	[M+H]+1	[M+H]+1	[M+NH4]+1	[M+H]+1	[M+H]+1	[M+H]+1	[M+H]+1	[M+H]+1	[M+H]+1	[M+H]+1	[M+H]+1	[M+H]+1	[M+H]+1	[M+H]+1	[M+H-NH3]+1	[M+H]+1	[M+H]+1	[M+H]+1	[M+H]+1	[M+H]+1	[M+H]+1	[M+H]+1	[M+H]+1	[M+H]+1	[M+H]+1	[M+H]+1	[M+H]+1	[M+H]+1	[M+H]+1
Sample	Class	1,3-di-o-Tolylguanidine	1-Aminocyclohexanecarboxylic acid	1-Methylhistidine	1-Methylnicotinamide	2,2,6,6-Tetramethyl-4-piperidinol	2,4-Diaminotoluene	2,4-Dimethylbenzaldehyde	2-Amino-4-methylpyrimidine	3-Hydroxy-2-methylpyridine	4-Methyl-5-thiazoleethanol	5-Hydroxyindole-3-acetic acid	8-Hydroxyquinoline	Acetylcholine	Acetyl-L-carnitine	Adenosine 5'-monophosphate	Adenosine diphosphate (ADP)	Aniline	Argininosuccinic acid	Asparagine	Aspartame	Bis(4-ethylbenzylidene)sorbitol	Caprolactam	Choline	Creatine	Cysteinylglycine	Cytidine 5'-diphosphocholine	Cytosine	D-(-)-Aspartic acid	D-Carnitine	Decanamide	Didecyldimethylammonium	DL-Arginine	DL-Carnitine	DL-Glutamine	DL-Serine	Erucamide	Ethylenediaminetetraacetic acid (EDTA)	Ethyltriglycol	Glucose 1-phosphate	Glycylglycine	Glycylproline	Guanine	Hexamethylenetetramine	Hexanoylcarnitine	Hypoxanthine	Inosine	Inosine-5'-monophosphate (IMP)	Isoleucine
s1	Control	286696	5.21855e+06	786647	7.25189e+08	1.28469e+07	1.23887e+06	744347	1.74075e+06	1.5429e+06	2.03177e+07	1.44966e+06	700023	9.38319e+06	9.11276e+07	9.44353e+06	2.23983e+07	432866	8.27539e+06	242830	946148	1.47324e+07	1.48637e+07	9.99653e+09	1.47288e+07	1.42041e+06	5.41777e+06	1.50329e+06	1.02053e+06	1.82067e+08	586364	724375	1.7663e+07	2.03368e+06	3.34222e+06	882632	192339	4.91793e+06	1.20071e+06	2.00285e+06	213417	866944	1.76575e+07	944805	231811	2.14066e+08	7.63203e+06	1.35311e+06	8.97664e+07
s2	Control	670475	5.48346e+06	1.75534e+06	6.63106e+08	4.12956e+07	185119	851329	2.61675e+06	1.09389e+06	2.32924e+07	3.94871e+06	518030	1.95057e+07	8.31069e+07	1.23866e+07	1.69011e+07	604387	4.80432e+06	716234	824399	1.72389e+07	4.13398e+07	7.98251e+09	1.27499e+07	713636	5.29585e+06	1.26003e+06	1.2546e+06	2.64452e+08	479814	671996	1.64036e+07	1.9314e+06	3.31939e+06	1.0029e+06	388717	7.05007e+06	850970	1.9105e+06	263712	689272	7.07053e+06	1.04066e+06	241374	2.43736e+08	5.11708e+06	782823	1.08339e+08
s3	Control	2.98848e+06	5.35261e+06	446441	4.80758e+08	2.74913e+07	1.12009e+07	1.04169e+06	1.72533e+06	997813	1.49826e+07	2.66559e+06	146122	6.08382e+06	3.00417e+07	1.11342e+07	1.31396e+07	461713	4.82193e+06	701909	587116	2.20051e+07	1.09808e+07	7.42355e+09	4.82518e+06	926912	3.05378e+06	870187	385391	1.28739e+08	671116	826434	4.12288e+06	2.22267e+06	2.87685e+06	830254	333985	2.26093e+06	835766	797798	167063	572586	1.50583e+07	5.59449e+07	142828	2.16472e+08	1.34186e+07	165373	5.74237e+07
s4	Control	831288	5.35045e+06	851076	6.13743e+08	2.44324e+07	1.36955e+06	870704	1.98819e+06	1.18975e+06	1.92114e+07	2.4803e+06	375601	1.03648e+07	6.10479e+07	1.09206e+07	1.70701e+07	494326	5.76607e+06	496074	770798	1.77461e+07	1.88963e+07	8.39847e+09	9.67674e+06	979437	4.44152e+06	1.18126e+06	790213	1.83694e+08	573692	738209	1.06105e+07	2.05909e+06	3.17203e+06	902435	292287	4.27977e+06	948737	1.45065e+06	211064	699424	1.2342e+07	3.80309e+06	199930	2.24366e+08	8.06226e+06	559526	8.23499e+07
s5	Control	558897	3.40736e+06	571809	3.40429e+08	1.48861e+07	907489	584608	1.30319e+06	791588	1.17873e+07	1.61531e+06	258438	6.4748e+06	3.62162e+07	6.81163e+06	1.05097e+07	337418	3.66405e+06	338576	519369	1.09135e+07	1.15996e+07	4.31664e+09	6.05705e+06	655363	2.8439e+06	786107	532065	1.05534e+08	389898	498037	6.62372e+06	1.34829e+06	2.05106e+06	605281	202587	2.7433e+06	635410	959620	147684	472613	7.67079e+06	2.44614e+06	140115	1.28152e+08	5.07338e+06	380547	4.84295e+07
s6	Treatment	50424.9	5.42526e+06	3.6482e+06	2.00951e+09	8.84665e+06	164444	1.8024e+06	4.33639e+06	1.65039e+06	2.08961e+07	1.29604e+07	1.18859e+06	3.86404e+07	1.68103e+08	5.83082e+07	3.63481e+07	1.98694e+06	1.07808e+07	3.91077e+06	318960	4.29006e+07	1.26874e+07	1.03664e+10	4.18959e+07	3.56922e+06	8.78871e+06	1.63512e+06	3.6987e+06	3.99678e+08	388042	791987	4.56737e+07	2.36854e+06	1.29041e+07	2.40378e+06	3.81731e+06	5.59273e+06	314084	7.60554e+06	574066	1.30147e+06	2.0166e+07	523121	2.08511e+06	4.17796e+08	2.27806e+07	477591	2.32908e+08
s7	Treatment	1.08122e+06	5.0678e+06	7.60233e+06	1.87402e+09	9.49583e+07	460150	2.70269e+06	5.23681e+06	2.12655e+06	2.655e+07	1.81602e+07	1.80844e+06	5.19605e+07	1.30596e+08	5.56494e+07	3.03015e+07	2.66527e+06	1.31481e+07	8.21478e+06	554233	6.73674e+07	1.51737e+07	1.17227e+10	6.23987e+07	3.37069e+06	1.0764e+07	1.22549e+06	5.53021e+06	6.171e+08	362907	1.99387e+06	5.05342e+07	1.81398e+06	1.99057e+07	3.59768e+06	288363	1.90917e+07	385835	7.91705e+06	853719	2.22204e+06	7.18376e+06	941681	2.06068e+06	7.36412e+08	4.66894e+07	346923	3.85136e+08
s8	Treatment	99568.7	5.63041e+06	4.24641e+06	1.34903e+09	7.67097e+06	263716	1.70339e+06	4.96117e+06	3.45017e+06	2.5521e+07	1.28237e+07	2.36571e+06	2.50929e+07	1.2576e+08	5.65722e+07	4.23775e+07	2.01613e+06	1.0942e+07	4.68609e+06	398435	4.14688e+07	8.23107e+06	1.39705e+10	3.53549e+07	1.12432e+06	9.85741e+06	1.21801e+06	3.89799e+06	3.07706e+08	458683	885692	7.73778e+07	1.88441e+06	1.95353e+07	3.39027e+06	413856	6.10392e+06	320214	8.02796e+06	609274	1.66521e+06	8.91563e+06	655448	809454	2.83023e+08	2.48882e+06	396367	2.83124e+08
s9	Treatment	175750	5.36941e+06	4.90173e+06	1.71908e+09	1.86089e+07	271239	2.02451e+06	4.82977e+06	2.29633e+06	2.41922e+07	1.44517e+07	1.71962e+06	3.69336e+07	1.40287e+08	5.68326e+07	3.60048e+07	2.20199e+06	1.15754e+07	5.31973e+06	412979	4.93035e+07	1.16584e+07	1.19295e+10	4.52132e+07	2.38265e+06	9.76983e+06	1.34639e+06	4.30405e+06	4.23384e+08	401232	1.11832e+06	5.63148e+07	2.00799e+06	1.71202e+07	3.08355e+06	769452	8.67013e+06	338555	7.84813e+06	668390	1.6887e+06	1.08903e+07	686038	1.51511e+06	4.43236e+08	1.38333e+07	403455	2.9394e+08
s10	Treatment	123632	3.41908e+06	3.12957e+06	9.2535e+08	1.14283e+07	188408	1.3263e+06	3.08495e+06	1.49886e+06	1.47441e+07	8.9408e+06	1.13193e+06	2.22337e+07	8.12315e+07	3.37859e+07	2.16906e+07	1.43904e+06	7.20781e+06	3.38836e+06	283372	2.94316e+07	7.25797e+06	6.06916e+09	2.7058e+07	1.55353e+06	6.11362e+06	892587	2.7584e+06	2.37394e+08	275543	745408	3.3487e+07	1.31579e+06	1.05396e+07	1.99549e+06	518489	5.44436e+06	233654	4.94251e+06	452240	1.11216e+06	6.79327e+06	463828	1.00099e+06	2.48194e+08	8.56914e+06	277025	1.66575e+08
[truncated: 43 more columns]

## Sheet: Metaboloimcs (log2 normalised)
Name		1,3-di-o-Tolylguanidine	1-Aminocyclohexanecarboxylic acid	1-Methylhistidine	1-Methylnicotinamide	2,2,6,6-Tetramethyl-4-piperidinol	2,4-Diaminotoluene	2,4-Dimethylbenzaldehyde	2-Amino-4-methylpyrimidine	3-Hydroxy-2-methylpyridine	4-Methyl-5-thiazoleethanol	5-Hydroxyindole-3-acetic acid	8-Hydroxyquinoline	Acetylcholine	Acetyl-L-carnitine	Adenosine 5'-monophosphate	Adenosine diphosphate (ADP)	Aniline	Argininosuccinic acid	Asparagine	Aspartame	Bis(4-ethylbenzylidene)sorbitol	Caprolactam	Choline	Creatine	Cysteinylglycine	Cytidine 5'-diphosphocholine	Cytosine	D-(-)-Aspartic acid	D-Carnitine	Decanamide	Didecyldimethylammonium	DL-Arginine	DL-Carnitine	DL-Glutamine	DL-Serine	Erucamide	Ethylenediaminetetraacetic acid (EDTA)	Ethyltriglycol	Glucose 1-phosphate	Glycylglycine	Glycylproline	Guanine	Hexamethylenetetramine	Hexanoylcarnitine	Hypoxanthine	Inosine	Inosine-5'-monophosphate (IMP)	Isoleucine
Formula		C15 H17 N3	C7 H13 N O2	C7 H11 N3 O2	C7 H8 N2 O	C9 H19 N O	C7 H10 N2	C9 H10 O	C5 H7 N3	C6 H7 N O	C6 H9 N O S	C10 H9 N O3	C9 H7 N O	C7 H15 N O2	C9 H17 N O4	C10 H14 N5 O7 P	C10 H15 N5 O10 P2	C6 H7 N	C10 H18 N4 O6	C4 H8 N2 O3	C14 H18 N2 O5	C24 H30 O6	C6 H11 N O	C5 H13 N O	C4 H9 N3 O2	C5 H10 N2 O3 S	C14 H26 N4 O11 P2	C4 H5 N3 O	C4 H7 N O4	C7 H15 N O3	C10 H21 N O	C22 H47 N	C6 H14 N4 O2	C7 H15 N O3	C5 H10 N2 O3	C3 H7 N O3	C22 H43 N O	C10 H16 N2 O8	C8 H18 O4	C6 H13 O9 P	C4 H8 N2 O3	C7 H12 N2 O3	C5 H5 N5 O	C6 H12 N4	C13 H25 N O4	C5 H4 N4 O	C10 H12 N4 O5	C10 H13 N4 O8 P	C6 H13 N O2
Annot. DeltaMass [ppm]		-4.14	-6.65	-6.37	-7.84	-6.47	-7.45	-6.62	-6.87	-6.72	-5.99	-7.41	-6.23	-6.27	-7.35	-6.42	-6.34	-7.2	-6.45	-6.67	-7.05	-6.94	-7.52	-8.41	-6.81	-6.72	-5.4	-6.61	-6.97	-7.23	-6.48	-6.5	-6.37	-7.39	-6.7	-8.48	-5.61	-6.89	-6.93	-6.99	-6.64	-7.3	-7.22	-8.1	-7.25	-7.37	-6.8	-6.59	-7.26
Calc. MW		239.141	143.094	169.084	136.063	157.146	122.083	134.072	109.063	109.052	143.04	191.057	145.052	145.109	203.114	347.061	427.027	93.0572	290.121	132.053	294.12	414.201	113.083	103.099	131.069	178.04	488.105	111.043	133.037	161.104	171.161	325.369	174.111	161.104	146.068	105.042	337.333	292.089	178.119	260.028	132.053	172.084	151.048	140.105	259.176	136.038	268.079	348.045	131.094
m/z		240.149	144.101	170.091	137.07	158.153	123.091	135.08	110.071	110.059	144.047	209.091	146.059	146.117	204.122	348.068	428.034	94.0645	291.128	133.06	295.127	415.209	131.117	104.106	132.076	179.047	489.112	112.05	134.044	162.111	172.168	326.376	175.118	162.111	130.049	106.049	338.34	293.096	179.127	261.035	133.06	173.091	152.056	141.112	260.184	137.045	269.086	349.052	132.101
RT [min]		2.573	7.482	11.186	6.908	4.296	3.538	1.822	11.945	2.511	8.155	7.622	2.521	8.163	7.548	11.122	12.856	7.617	12.942	10.724	9.608	1.822	7.567	5.049	9.825	11.208	12.667	9.942	11.532	9.138	1.836	2.033	12.417	8.489	10.524	10.599	1.726	11.85	2.004	12.066	11.295	10.26	6.28	7.713	3.889	4.038	5.44	11.466	7.152
# mzCloud Results		1	2	2	5	2	2	6	1	5	1	1	13	1	1	2	1	8	1	1	1	2	1	1	1	1	1	2	2	3	1	1	2	3	3	3	5	1	1	2	1	2	1	1	1	2	1	1	4
mzCloud Best Match		92.5	92.9	91.4	93.1	99.7	81.2	97.8	71	99.1	98	79.7	96.7	73.9	96.8	99.5	97.2	81.1	98.5	93.6	75.1	98.2	71.2	87.1	95	93.1	96.8	75	99.7	99.7	79.9	99.9	88.8	76.4	98.5	99.7	97.3	98.2	76.9	99.2	95.1	93.7	76.4	96.7	99.5	94.4	100	99.7	99.8
# Adducts		1	1	1	1	1	1	1	1	1	1	2	1	2	1	2	1	1	2	1	1	5	2	2	3	1	1	1	1	4	1	1	1	1	3	2	1	2	1	3	1	2	1	1	1	6	5	1	1
MS2		DDA for preferred ion	DDA for preferred ion	DDA for preferred ion	DDA for preferred ion	DDA for preferred ion	DDA for preferred ion	DDA for preferred ion	DDA for preferred ion	DDA for preferred ion	DDA for preferred ion	DDA for preferred ion	DDA for preferred ion	DDA for preferred ion	DDA for preferred ion	DDA for preferred ion	DDA for preferred ion	DDA for preferred ion	DDA for preferred ion	DDA for preferred ion	DDA for preferred ion	DDA for preferred ion	DDA for preferred ion	DDA for preferred ion	DDA for preferred ion	DDA for preferred ion	DDA for preferred ion	DDA for preferred ion	DDA for preferred ion	DDA for preferred ion	DDA for preferred ion	DDA for preferred ion	DDA for preferred ion	DDA for preferred ion	DDA for preferred ion	DDA for preferred ion	DDA for preferred ion	DDA for preferred ion	DDA for preferred ion	DDA for preferred ion	DDA for preferred ion	DDA for preferred ion	DDA for preferred ion	DDA for preferred ion	DDA for preferred ion	DDA for preferred ion	DDA for preferred ion	DDA for preferred ion	DDA for preferred ion
MS Depth		2	2	2	2	2	2	2	2	2	2	2	2	2	2	2	2	2	2	2	2	2	2	2	2	2	2	2	2	2	2	2	2	2	2	2	2	2	2	2	2	2	2	2	2	2	2	2	2
Reference Ion		[M+H]+1	[M+H]+1	[M+H]+1	[M+H]+1	[M+H]+1	[M+H]+1	[M+H]+1	[M+H]+1	[M+H]+1	[M+H]+1	[M+NH4]+1	[M+H]+1	[M+H]+1	[M+H]+1	[M+H]+1	[M+H]+1	[M+H]+1	[M+H]+1	[M+H]+1	[M+H]+1	[M+H]+1	[M+NH4]+1	[M+H]+1	[M+H]+1	[M+H]+1	[M+H]+1	[M+H]+1	[M+H]+1	[M+H]+1	[M+H]+1	[M+H]+1	[M+H]+1	[M+H]+1	[M+H-NH3]+1	[M+H]+1	[M+H]+1	[M+H]+1	[M+H]+1	[M+H]+1	[M+H]+1	[M+H]+1	[M+H]+1	[M+H]+1	[M+H]+1	[M+H]+1	[M+H]+1	[M+H]+1	[M+H]+1
Sample	Class	1,3-di-o-Tolylguanidine	1-Aminocyclohexanecarboxylic acid	1-Methylhistidine	1-Methylnicotinamide	2,2,6,6-Tetramethyl-4-piperidinol	2,4-Diaminotoluene	2,4-Dimethylbenzaldehyde	2-Amino-4-methylpyrimidine	3-Hydroxy-2-methylpyridine	4-Methyl-5-thiazoleethanol	5-Hydroxyindole-3-acetic acid	8-Hydroxyquinoline	Acetylcholine	Acetyl-L-carnitine	Adenosine 5'-monophosphate	Adenosine diphosphate (ADP)	Aniline	Argininosuccinic acid	Asparagine	Aspartame	Bis(4-ethylbenzylidene)sorbitol	Caprolactam	Choline	Creatine	Cysteinylglycine	Cytidine 5'-diphosphocholine	Cytosine	D-(-)-Aspartic acid	D-Carnitine	Decanamide	Didecyldimethylammonium	DL-Arginine	DL-Carnitine	DL-Glutamine	DL-Serine	Erucamide	Ethylenediaminetetraacetic acid (EDTA)	Ethyltriglycol	Glucose 1-phosphate	Glycylglycine	Glycylproline	Guanine	Hexamethylenetetramine	Hexanoylcarnitine	Hypoxanthine	Inosine	Inosine-5'-monophosphate (IMP)	Isoleucine
s1	Control	18.1292	22.3152	19.5854	29.4338	23.6149	20.2406	19.5056	20.7313	20.5572	24.2762	20.4673	19.417	23.1616	26.4414	23.1709	24.4169	18.7236	22.9804	17.8896	19.8517	23.8125	23.8253	33.2188	23.8121	20.4379	22.3693	20.5197	19.9609	27.4399	19.1614	19.4664	24.0742	20.9557	21.6724	19.7515	17.5533	22.2296	20.1955	20.9336	17.7033	19.7256	24.0738	19.8497	17.8226	27.6735	22.8636	20.3679	26.4197
s2	Control	19.3548	22.3867	20.7433	29.3047	25.2995	17.4981	19.6994	21.3193	20.061	24.4734	21.9129	18.9827	24.2174	26.3085	23.5623	24.0106	19.2051	22.1959	19.4501	19.653	24.0392	25.301	32.8942	23.604	19.4448	22.3364	20.265	20.2588	27.9784	18.8721	19.3581	23.9675	20.8812	21.6625	19.9357	18.5684	22.7492	19.6987	20.8655	18.0086	19.3947	22.7534	19.9891	17.8809	27.8607	22.2869	19.5783	26.691
s3	Control	21.511	22.3518	18.7681	28.8407	24.7125	23.4171	19.9905	20.7184	19.9284	23.8368	21.346	17.1568	22.5365	24.8405	23.4085	23.6474	18.8166	22.2012	19.4209	19.1633	24.3913	23.3885	32.7895	22.2022	19.8221	21.5422	19.731	18.556	26.9399	19.3562	19.6565	21.9752	21.0839	21.4561	19.6632	18.3494	21.1085	19.6727	19.6057	17.35	19.1271	23.8441	25.7375	17.1239	27.6896	23.6777	17.3354	25.7751
s4	Control	19.665	22.3512	19.6989	29.1931	24.5423	20.3853	19.7318	20.923	20.1822	24.1955	21.2421	18.5188	23.3052	25.8634	23.3806	24.025	18.9151	22.4592	18.9202	19.556	24.081	24.1716	32.9675	23.2061	19.9016	22.0826	20.1719	19.5919	27.4527	19.1299	19.4937	23.339	20.9736	21.597	19.7835	18.157	22.0291	19.8556	20.4683	17.6873	19.4158	23.5571	21.8587	17.6091	27.7413	22.9428	19.0938	26.2953
s5	Control	19.0922	21.7002	19.1252	28.3428	23.8275	19.7915	19.1571	20.3136	19.5944	23.4907	20.6234	17.9795	22.6264	25.1101	22.6996	23.3252	18.3642	21.805	18.3691	18.9864	23.3796	23.4676	32.0073	22.5302	19.3219	21.4394	19.5844	19.0212	26.6531	18.5727	18.9259	22.6592	20.3627	20.9679	19.2072	17.6282	21.3875	19.2773	19.8721	17.1722	18.8503	22.8709	21.2221	17.0963	26.9333	22.2745	18.5377	25.5294
s6	Treatment	15.6218	22.3713	21.7988	30.9042	23.0767	17.3272	20.7815	22.0481	20.6544	24.3167	23.6276	20.1808	25.2036	27.3248	25.7972	25.1154	20.9221	23.362	21.899	18.283	25.3545	23.5969	33.2712	25.3203	21.7672	23.0672	20.641	21.8186	28.5743	18.5659	19.5951	25.4449	21.1756	23.6213	21.1969	21.8641	22.4151	18.2608	22.8586	19.1309	20.3117	24.2654	18.9968	20.9917	28.6382	24.4413	18.8654	27.7952
s7	Treatment	20.0442	22.2729	22.858	30.8035	26.5008	18.8117	21.366	22.3203	21.0201	24.6622	24.1143	20.7863	25.6309	26.9605	25.7299	24.8529	21.3459	23.6484	22.9698	19.0801	26.0055	23.8551	33.4486	25.895	21.6846	23.3597	20.2249	22.3989	29.2009	18.4692	20.9271	25.5908	20.7907	24.2467	21.7786	18.1375	24.1864	18.5576	22.9165	19.7034	21.0835	22.7763	19.8449	20.9747	29.4559	25.4766	18.4043	28.5208
s8	Treatment	16.6034	22.4248	22.0178	30.3293	22.871	18.0086	20.7	22.2423	21.7182	24.6052	23.6123	21.1738	24.5808	26.9061	25.7536	25.3368	20.9432	23.3834	22.16	18.604	25.3055	22.9726	33.7017	25.0754	20.1006	23.2328	20.2161	21.8943	28.197	18.8071	19.7564	26.2054	20.8457	24.2196	21.693	18.6588	22.5413	18.2887	22.9366	19.2167	20.6673	23.0879	19.3221	19.6266	28.0763	21.247	18.5965	28.0769
s9	Treatment	17.4232	22.3563	22.2249	30.679	24.1495	18.0492	20.9491	22.2035	21.1309	24.528	23.7847	20.7137	25.1384	27.0638	25.7602	25.1017	21.0704	23.4646	22.3429	18.6557	25.5552	23.4749	33.4738	25.4302	21.1841	23.2199	20.3607	22.0373	28.6574	18.6141	20.0929	25.747	20.9373	24.0292	21.5562	19.5535	23.0476	18.369	22.9039	19.3503	20.6875	23.3765	19.3879	20.531	28.7235	23.7216	18.622	28.1309
s10	Treatment	16.9157	21.7052	21.5775	29.7854	23.4461	17.5235	20.339	21.5568	20.5154	23.8136	23.092	20.1103	24.4062	26.2755	25.0099	24.3706	20.4567	22.7811	21.6922	18.1123	24.8109	22.7911	32.4988	24.6896	20.5671	22.5436	19.7676	21.3954	27.8227	18.0719	19.5077	24.9971	20.3275	23.3293	20.9283	18.984	22.3763	17.834	22.2368	18.7867	20.0849	22.6957	18.8232	19.933	27.8869	23.0307	18.0797	27.3116
[truncated: 43 more columns]

## Sheet: Metabolite VIP scoress
	Comp. 1
Aspartylphenylalanine	1.3132
Nicotinamide	1.2994
Adenosine 5'-monophosphate	1.2927
DL-Glutamine	1.2908
L-Pyroglutamic acid	1.2908
Aniline	1.2901
L-Tyrosine	1.2825
Asparagine	1.2735
Hexanoylcarnitine	1.2725
N-Benzylformamide	1.2687
DL-Serine	1.2686
L-Cystathionine	1.2664
5-Hydroxyindole-3-acetic acid	1.2603
Glucose 1-phosphate	1.2601
Glycylglycine	1.2558
Ethyltriglycol	1.2532
Leucylproline	1.2418
L-Phenylalanine	1.2398
D-(-)-Aspartic acid	1.2355
L-Cystine	1.2215
S-Adenosylhomocysteine	1.2179
1-Methylhistidine	1.2162
Isoleucine	1.2144
L-Valine	1.2117
Creatine	1.2074
2-Amino-4-methylpyrimidine	1.2056
L-Histidine	1.2045
Bis(4-ethylbenzylidene)sorbitol	1.1956
Glycylproline	1.1899
2,4-Dimethylbenzaldehyde	1.189
L-Isoleucine	1.1842
Methyl picolinate	1.1841
DL-Arginine	1.1811
1-Methylnicotinamide	1.1728
N8-Acetylspermidine.1	1.1694
8-Hydroxyquinoline	1.1574
N-Acetylneuraminic acid	1.1573
Acetylcholine	1.1534
L-(+)-Citrulline	1.148
L-Glutamic acid	1.1401
Cytidine 5'-diphosphocholine	1.14
Adenosine diphosphate (ADP)	1.1151
N3,N4-Dimethyl-L-arginine	1.1097
L(-)-Pipecolinic acid	1.103
N6-Acetyl-L-lysine	1.1012
Argininosuccinic acid	1.0999
L-Lysine	1.0947
Aspartame	1.077
Glutamyl-L-glutamic acid	1.0597
D-Carnitine	1.057
3-Hydroxy-2-methylpyridine	1.0472
Cysteinylglycine	1.0233
Acetyl-L-carnitine	1.0112
N6,N6,N6-Trimethyl-L-lysine	0.99357
Hypoxanthine	0.97613
Prolinamide	0.97302
Triethanolamine	0.96512
L-Glutathione (reduced)	0.94424
Decanamide	0.94119
1,3-di-o-Tolylguanidine	0.86479
2,4-Diaminotoluene	0.85722
Norharman	0.83978
Hexamethylenetetramine	0.83367
Ethylenediaminetetraacetic acid (EDTA)	0.83036
L-Methionine sulfoxide	0.82073
Propionylcarnitine	0.81831
Didecyldimethylammonium	0.7911
Erucamide	0.78196
N8-Acetylspermidine	0.72312
Caprolactam	0.6971
Choline	0.69611
Nicotinamide adenine dinucleotide (NAD+)	0.68975
4-Methyl-5-thiazoleethanol	0.5979
Thiamine	0.58616
N6-Me-Adenosine	0.56972
N,N-Diisopropylethylamine (DIPEA)	0.55298
Methylimidazoleacetic acid	0.50745
Inosine	0.454
Urocanic acid	0.40457
Inosine-5'-monophosphate (IMP)	0.4008
Cytosine	0.37949
2,2,6,6-Tetramethyl-4-piperidinol	0.24872
S-Adenosylmethionine	0.22183
Lactose	0.21699
Guanine	0.21646
N-Methyl-2-pyrrolidone	0.095664
DL-Carnitine	0.090404
Pyridoxal	0.077868
Spermine	0.053008
1-Aminocyclohexanecarboxylic acid	0.012856
Methyl-L-histidinate	0.0077418

## Sheet: Lipds (raw data)
Name	Formula	Annot. DeltaMass [ppm]	Calc. MW	m/z	RT [min]	mzVault Best Match	MS Depth	Reference Ion	Area: C1_Lipid_Neg.raw (F1)	Area: C1_Lipid_Neg_20220723183141.raw (F2)	Area: C1_Lipid_Neg_20220723190232.raw (F3)	Area: C1_Lipid_Neg_20220725224811.raw (F4)	Area: C1_Lipid_Neg_20220725234956.raw (F5)	Area: C1_Lipid_Neg_20220726080329.raw (F6)	Area: C2_Lipid_Neg.raw (F7)	Area: C3_Lipid_Neg.raw (F8)	Area: C3_Lipid_Neg_20220726052910.raw (F9)	Area: C5_Lipid_Neg.raw (F10)	Area: C6_Lipid_Neg.raw (F11)	Area: C7_Lipid_Neg.raw (F12)	Area: Gina_Qc1_Lipid_Neg.raw (F14)	Area: T1_Lipid_Neg.raw (F18)	Area: T3_Lipid_Neg.raw (F19)	Area: T5_Lipid_Neg.raw (F20)	Area: T6_Lipid_Neg.raw (F21)	Area: T7_Lipid_Neg.raw (F22)
Cer 18:1;2O/16:0	C34 H67 N O3	0.4	537.512	538.52	9.205	81.3	2	[M+H]+1	4.63603e+07	5.68549e+07	742239	6.74669e+07	7.14243e+07	4.9062e+07	5.37173e+07	4.68765e+07	4.73144e+07	4.68043e+07	4.83506e+07	6.72221e+07	6.84393e+07	6.75427e+07	5.48275e+07	6.05616e+07	6.80867e+07	6.32628e+07
Cer 18:1;2O/18:0	C36 H71 N O3	0.37	565.544	566.551	11.28	73.5	2	[M+H]+1	3.18303e+06	3.8165e+06	205063	6.481e+06	6.8312e+06	2.69713e+06	3.92468e+06	3.3292e+06	2.23488e+06	2.68109e+06	2.42143e+06	5.21916e+06	4.47226e+06	4.1536e+06	2.77909e+06	4.5564e+06	4.0169e+06	4.03027e+06
Cer 18:1;2O/22:0	C40 H79 N O3	-0.33	621.606	622.613	15.314	77.3	2	[M+H]+1	2.11394e+07	2.27825e+07	156193	274415	239738	1.76216e+07	2.18246e+07	1.93817e+07	2.01241e+07	2.38642e+07	2.2472e+07	2.53887e+07	2.18954e+07	3.42579e+07	1.9723e+07	2.65222e+07	2.92633e+07	3.28249e+07
Cer 18:1;2O/23:0	C41 H81 N O3	-0.55	635.621	636.629	16.101	72.8	2	[M+H]+1	7.12853e+06	6.21245e+06	211371	1.31929e+07	1.35656e+07	6.3734e+06	6.49391e+06	7.25041e+06	8.35714e+06	8.61373e+06	8.10317e+06	6.01894e+06	7.42388e+06	9.34892e+06	7.525e+06	7.01087e+06	1.0644e+07	9.56518e+06
Cer 18:1;2O/24:0	C42 H83 N O3	-0.34	649.637	650.644	16.682	75.8	2	[M+H]+1	5.22235e+07	4.93507e+07	132690	239635	3.75563e+06	5.4672e+07	4.57302e+07	6.07987e+07	7.19611e+07	6.45744e+07	7.13475e+07	4.31165e+07	5.43068e+07	5.88806e+07	6.90411e+07	5.10986e+07	1.08179e+08	7.01903e+07
Cer 18:2;2O/16:0	C34 H65 N O3	0.79	535.497	536.504	7.654	80.7	2	[M+H]+1	4.77308e+06	7.87834e+06	1.04278e+07	1.8551e+07	1.83977e+07	6.82969e+06	5.9729e+06	3.73152e+06	4.9395e+06	3.51693e+06	7.15248e+06	6.70576e+06	6.97626e+06	8.27943e+06	5.8355e+06	4.10715e+06	5.68681e+06	5.18899e+06
Cer 18:2;2O/22:0	C40 H77 N O3	0.04	619.59	620.598	13.946	75.5	2	[M+H]+1	7.76523e+06	1.21868e+07	176934	1.48299e+07	1.62582e+07	6.94583e+06	1.08854e+07	5.61619e+06	5.65141e+06	6.04168e+06	4.9097e+06	1.00691e+07	9.87102e+06	1.05598e+07	6.35368e+06	8.87463e+06	1.16292e+07	9.06803e+06
Cer 18:2;2O/23:0	C41 H79 N O3	-0.07	633.606	634.613	14.86	75.9	2	[M+H]+1	2.73978e+06	3.64573e+06	158910	7.82687e+06	7.6785e+06	2.50761e+06	3.34326e+06	1.90193e+06	2.37028e+06	2.28442e+06	2.132e+06	3.22441e+06	3.12903e+06	3.98077e+06	1.82272e+06	2.76313e+06	3.11985e+06	3.37328e+06
Cer 18:2;2O/24:0	C42 H81 N O3	0.83	647.622	648.629	15.853	77.2	2	[M+H]+1	4.28914e+07	6.67264e+07	288092	2.05203e+08	2.10292e+08	5.36147e+07	7.70613e+07	2.96335e+07	4.77589e+07	4.11403e+07	4.11221e+07	5.08443e+07	5.75213e+07	7.61575e+07	3.85995e+07	6.63032e+07	5.64392e+07	5.93188e+07
Cer 18:2;2O/24:1	C42 H79 N O3	0.21	645.606	646.613	13.927	75	2	[M+H]+1	1.23656e+07	1.47359e+07	186246	1.76892e+07	2.08628e+07	1.31182e+07	1.68264e+07	9.16374e+06	8.08628e+06	8.4916e+06	7.08909e+06	1.21579e+07	1.15321e+07	1.20402e+07	1.0026e+07	1.2224e+07	1.00729e+07	9.88285e+06
DG 16:0_18:1	C37 H70 O5	-0.08	594.522	612.556	13.417	76.9	2	[M+NH4]+1	1.53031e+07	1.30833e+07	237866	3.1055e+07	3.02678e+07	1.15899e+07	2.02231e+07	1.90098e+07	1.7505e+07	2.30926e+07	1.62119e+07	2.24234e+07	1.42565e+07	1.72249e+07	1.57309e+07	1.76342e+07	2.3649e+07	2.11538e+07
DG 18:0_18:1	C39 H74 O5	-0.13	622.554	640.587	15.215	85	2	[M+NH4]+1	1.51377e+07	1.16621e+07	194908	3.3905e+07	3.51286e+07	1.35016e+07	2.0648e+07	1.66104e+07	1.86018e+07	2.34595e+07	1.77366e+07	2.1393e+07	1.53253e+07	2.13906e+07	1.55596e+07	1.8394e+07	2.63273e+07	2.61226e+07
Hex2Cer 18:1;2O/22:0	C52 H99 N O13	-1.62	945.71	946.717	12	76	2	[M+H]+1	3.35514e+06	4.04878e+06	174206	2.97258e+06	3.59743e+06	5.20107e+06	4.61097e+06	1.8368e+06	1.5569e+06	2.43544e+06	1.76068e+06	4.39997e+06	3.83547e+06	3.83584e+06	2.25146e+06	3.84787e+06	3.21469e+06	3.78243e+06
Hex2Cer 18:1;2O/24:0	C54 H103 N O13	-0.8	973.742	974.749	14.055	72.3	2	[M+H]+1	3.64253e+06	5.64955e+06	167545	9.31758e+06	8.14151e+06	6.13395e+06	5.58636e+06	2.84608e+06	4.79921e+06	3.26486e+06	4.53282e+06	4.54279e+06	4.16867e+06	5.31849e+06	4.01053e+06	4.69299e+06	6.16461e+06	6.45085e+06
Hex2Cer 18:2;2O/24:0	C54 H101 N O13	-0.87	971.726	972.734	12.478	71.3	2	[M+H]+1	315920	197621	126820	1.78254e+06	1.91551e+06	649555	553711	203258	456523	178226	328719	456794	260958	247465	296822	861880	296956	178542
Hex3Cer 18:1;2O/16:0	C52 H97 N O18	-0.38	1023.67	1024.68	5.946	76.2	2	[M+H]+1	1.48752e+07	1.1499e+07	9.5447e+06	5.86787e+06	5.67615e+06	1.42152e+07	1.4586e+07	1.01332e+07	8.66185e+06	1.11904e+07	9.98696e+06	1.07798e+07	1.24471e+07	1.15455e+07	9.62169e+06	1.2268e+07	1.28017e+07	1.2831e+07
Hex3Cer 18:1;2O/18:0	C54 H101 N O18	-1.18	1051.7	1052.71	7.468	75.9	2	[M+H]+1	3.71649e+06	2.28495e+06	2.25635e+06	2.33701e+06	2.26375e+06	2.51693e+06	3.12131e+06	2.67712e+06	1.64023e+06	2.70751e+06	1.49976e+06	2.37436e+06	2.33246e+06	2.4893e+06	1.29907e+06	2.46536e+06	2.5392e+06	2.83181e+06
Hex3Cer 18:1;2O/20:0	C56 H105 N O18	-1.83	1079.73	1080.74	9.258	71.8	2	[M+H]+1	3.28786e+06	2.16342e+06	215261	2.26272e+06	1.90501e+06	1.01047e+06	2.85584e+06	2.20187e+06	1.22485e+06	2.33552e+06	1.32535e+06	1.98857e+06	2.06296e+06	2.0167e+06	750977	2.33152e+06	2.03188e+06	2.19508e+06
Hex3Cer 18:1;2O/22:0	C58 H109 N O18	-0.75	1107.76	1108.77	11.253	78.7	2	[M+H]+1	1.93769e+07	1.19361e+07	225870	1.74178e+07	1.62937e+07	1.58821e+07	1.59599e+07	1.25991e+07	9.93548e+06	1.40972e+07	8.69874e+06	1.2009e+07	1.2151e+07	1.4127e+07	1.05806e+07	1.2526e+07	1.49678e+07	1.42043e+07
Hex3Cer 18:1;2O/24:0	C60 H113 N O18	-0.94	1135.79	1136.8	13.385	78.9	2	[M+H]+1	1.72339e+07	1.19342e+07	203643	2.20516e+07	1.93427e+07	1.36068e+07	1.60915e+07	1.22914e+07	1.16361e+07	1.56002e+07	1.12478e+07	1.10193e+07	1.07097e+07	1.2915e+07	1.01256e+07	1.17733e+07	1.49055e+07	1.51878e+07
Hex3Cer 18:1;2O/24:1	C60 H111 N O18	-0.74	1133.78	1134.79	11.203	80	2	[M+H]+1	1.38375e+07	8.30486e+06	199265	9.45842e+06	8.88605e+06	1.13132e+07	1.27987e+07	9.06134e+06	7.71361e+06	9.29926e+06	7.80402e+06	9.30867e+06	8.86619e+06	9.64432e+06	7.5555e+06	9.68219e+06	1.11821e+07	1.09185e+07
Hex3Cer 18:2;2O/22:0	C58 H107 N O18	-0.34	1105.75	1106.76	9.641	76.1	2	[M+H]+1	4.16755e+06	2.93567e+06	172901	2.69004e+06	2.87798e+06	2.35616e+06	4.3713e+06	2.49334e+06	1.81055e+06	2.84002e+06	1.89686e+06	2.98582e+06	2.92465e+06	2.84653e+06	1.09315e+06	2.9431e+06	2.98073e+06	2.98243e+06
Hex3Cer 18:2;2O/24:0	C60 H111 N O18	-0.84	1133.78	1134.79	11.699	76.6	2	[M+H]+1	4.73911e+06	4.76839e+06	215788	5.45429e+06	5.33571e+06	4.7027e+06	7.21856e+06	4.05759e+06	2.8784e+06	3.64099e+06	2.65867e+06	4.20709e+06	4.26059e+06	5.20775e+06	2.99096e+06	4.30803e+06	5.60459e+06	4.41849e+06
Hex3Cer 18:2;2O/24:1	C60 H109 N O18	-0.29	1131.76	1132.77	9.601	75.3	2	[M+H]+1	2.54166e+06	1.5629e+06	169529	1.88097e+06	1.47275e+06	1.14086e+06	2.48053e+06	2.10373e+06	946320	1.91174e+06	1.09693e+06	1.33496e+06	1.36519e+06	1.75164e+06	851779	1.66473e+06	1.76026e+06	1.50723e+06
Hex3Cer 34:1;2O	C52 H97 N O18	0.68	1023.67	1068.67	7.939	89.6	2	[M+FA-H]-1	4.28169e+06	5.06121e+06	5.11246e+06	5.12679e+06	5.17902e+06	4.94446e+06	5.43159e+06	4.01884e+06	3.50248e+06	4.04863e+06	3.63165e+06	5.67856e+06	4.72763e+06	3.68096e+06	3.95529e+06	4.22383e+06	2.86033e+06	4.17282e+06
Hex3Cer 40:1;2O	C58 H109 N O18	0.51	1107.77	1152.76	13.442	91.2	2	[M+FA-H]-1	4.96479e+06	5.54052e+06	5.67531e+06	5.08777e+06	5.2488e+06	5.29164e+06	7.02662e+06	3.77404e+06	5.14333e+06	3.60488e+06	4.19251e+06	4.31324e+06	5.05219e+06	3.77767e+06	3.2577e+06	3.61952e+06	3.13186e+06	3.7353e+06
Hex3Cer 42:1;2O	C60 H113 N O18	0.69	1135.8	1180.79	15.556	88.9	2	[M+FA-H]-1	4.37162e+06	4.94739e+06	4.94274e+06	4.52627e+06	4.40915e+06	4.32889e+06	1.8977e+07	5.56023e+06	4.6519e+06	6.22678e+06	5.66061e+06	4.91666e+06	7.79503e+06	3.1374e+06	3.98036e+06	4.71947e+06	3.98297e+06	3.96405e+06
HexCer 18:1;2O/24:0;O	C48 H93 N O9	-2.84	827.683	828.69	14.495	72.7	2	[M+H]+1	2.65201e+06	9.2559e+06	224551	5.71825e+06	6.72193e+06	3.60751e+06	5.86587e+06	1.62755e+06	2.09958e+06	2.50272e+06	2.36898e+06	1.71315e+06	5.29025e+06	3.29999e+06	701767	8.58873e+06	3.74242e+06	2.63432e+06
LPC 16:0-SN1	C24 H50 N O7 P	0.86	495.333	496.34	2.189	86.5	2	[M+H]+1	1.3109e+08	9.30214e+07	9.58122e+07	7.06201e+07	7.38368e+07	5.77127e+07	1.08219e+08	1.16544e+08	5.48177e+07	1.03532e+08	5.71623e+07	9.02201e+07	1.19348e+08	8.2266e+07	7.03039e+07	9.02542e+07	6.67131e+07	7.42067e+07
LPC 18:0-SN1	C26 H54 N O7 P	0.94	523.364	524.372	2.66	75.4	2	[M+H]+1	3.8087e+07	5.81511e+07	9.50421e+07	8.0174e+06	8.04625e+06	5.62014e+07	5.04423e+07	3.22602e+07	3.12069e+07	2.75728e+07	3.21688e+07	6.03687e+07	7.99545e+07	5.51818e+07	2.13291e+07	4.58314e+07	3.81622e+07	3.36083e+07
LPE 16:0	C21 H44 N O7 P	0.56	453.286	454.293	2.212	78.1	2	[M+H]+1	6.31458e+06	1.13271e+07	2.73162e+06	1.97421e+06	2.00521e+06	8.77408e+06	1.02163e+07	6.84646e+06	9.15804e+06	6.91796e+06	9.3643e+06	1.29219e+07	1.66626e+07	1.2922e+07	9.91999e+06	9.07454e+06	8.5797e+06	9.04615e+06
LPE 16:1	C21 H42 N O7 P	0.4	451.27	450.263	2.669	80.7	2	[M-H]-1	8937.77	10081.9	8789.2	239448	299648	315492	239601	122996	458231	55844.6	35407.4	136142	2.51875e+06	316826	287524	167691	104408	239812
LPE 17:1	C22 H44 N O7 P	0.38	465.286	464.278	2.903	75.6	2	[M-H]-1	6210.65	55598.6	6459.23	66768.2	71764.9	75429.9	117551	5865.22	221464	18600.1	5969.83	6301.48	1.21913e+06	106737	80752	5972.42	5991.78	6246.76
LPE 18:0	C23 H48 N O7 P	0.79	481.317	480.31	4.399	91.2	2	[M-H]-1	10602.6	2.68638e+06	1.88418e+06	3.39576e+06	3.28493e+06	3.26767e+06	1.86253e+06	2.41864e+06	1.83117e+06	1.52552e+06	952885	1.79913e+06	5.63394e+06	3.20535e+06	2.23469e+06	1.93793e+06	2.29102e+06	3.1727e+06
LPE 18:1	C23 H46 N O7 P	0.9	479.302	480.309	2.215	86.3	2	[M+H]+1	3.23578e+07	1.59646e+07	3.2225e+06	2.57632e+06	2.57068e+06	4.22795e+06	2.01265e+07	3.32466e+07	4.79988e+06	3.29342e+07	1.56611e+07	2.14456e+07	1.53372e+07	1.28102e+07	1.72446e+07	2.85192e+07	2.73542e+07	2.90886e+07
LPE 18:2	C23 H44 N O7 P	1.03	477.286	478.293	1.968	74.8	2	[M+H]+1	2.52069e+06	1.42397e+06	220184	162430	70802.3	2.79756e+06	1.39591e+06	2.94834e+06	1.09921e+06	2.49096e+06	1.20055e+06	1.75537e+06	2.13655e+06	1.97277e+06	726137	2.4208e+06	2.81251e+06	2.51991e+06
LPE 20:1	C25 H50 N O7 P	0.79	507.333	506.326	4.335	84.6	2	[M-H]-1	18327.8	740631	698497	774464	805399	743977	957060	205151	1.05181e+06	339837	61366.6	566506	6.80489e+06	631108	481800	582563	165035	404921
LPE 20:2	C25 H48 N O7 P	0.84	505.317	504.31	3.837	73.3	2	[M-H]-1	8780.86	77222.7	45499.9	95545	124636	160984	76561.3	9772.79	169738	10313.3	9496.71	46752.2	924517	112607	28806	9840.58	10334.6	38174.3
LPE 20:3	C25 H46 N O7 P	1.04	503.302	502.294	3.333	82.2	2	[M-H]-1	15259.3	52703.6	597222	258631	233795	289850	212449	579997	313766	131708	93697.5	419785	2.94981e+06	241562	181000	394933	370433	1.36114e+06
LPE 20:3	C25 H46 N O7 P	1.01	503.302	502.294	3.045	81.1	2	[M-H]-1	8236.16	409408	9272.02	583201	606034	576748	448990	52167.8	855843	58490.8	7908.55	8017.84	7.63745e+06	624590	533612	27566.3	7973.12	8378.51
LPE 20:3	C25 H46 N O7 P	0.77	503.302	504.309	2.071	81.1	2	[M+H]+1	3.73342e+06	1.05609e+06	94191.7	188016	178922	2.84745e+06	1.52295e+06	2.03563e+06	1.29402e+06	3.55901e+06	958397	2.78615e+06	2.0048e+06	1.71313e+06	976356	3.63535e+06	3.06093e+06	3.32231e+06
LPE 20:4	C25 H44 N O7 P	0.93	501.286	502.293	1.935	79.5	2	[M+H]+1	2.10853e+07	1.06764e+07	1.938e+06	1.80592e+06	1.78539e+06	4.91281e+06	1.14386e+07	2.00857e+07	1.11615e+07	1.96105e+07	1.09825e+07	1.81954e+07	1.57138e+07	1.36246e+07	1.0968e+07	2.18776e+07	2.29945e+07	2.20204e+07
LPE 20:5	C25 H42 N O7 P	0.8	499.27	500.278	1.871	78	2	[M+H]+1	5.02836e+06	2.39963e+06	472085	423848	403154	2.0708e+06	2.35429e+06	5.48997e+06	2.42561e+06	5.20481e+06	2.25675e+06	5.19986e+06	3.74938e+06	3.39236e+06	2.49704e+06	5.45063e+06	5.79274e+06	5.62346e+06
LPE 22:1	C27 H54 N O7 P	0.88	535.364	534.357	5.257	81.9	2	[M-H]-1	11920.3	156339	206164	179976	188311	186396	26649.1	143514	9827.08	28568.3	32474.6	29231.4	1.92995e+06	18886.5	32905.8	45293.6	15816.3	31979.7
LPE 22:2	C27 H52 N O7 P	0.99	533.349	532.341	4.594	84.4	2	[M-H]-1	8115.57	116550	56775.3	110569	115507	110675	145903	10092.4	148021	11798.7	9601.46	70211.7	968450	85914.4	36412.1	50355.7	9736.43	10504.7
LPE 22:3	C27 H50 N O7 P	0.7	531.333	530.326	4.103	79.4	2	[M-H]-1	7870.6	153513	199173	176839	183006	193492	165104	10198.3	177587	32943.9	10139.6	95821	2.20211e+06	145222	129786	78059.3	8677.05	9697.79
LPE 22:4	C27 H48 N O7 P	1.07	529.317	528.31	3.406	86.7	2	[M-H]-1	14646.4	261492	143648	673427	630255	684022	785154	402185	430853	102657	251494	288345	9.11173e+06	453815	689955	312292	428034	298297
LPE 22:4	C27 H48 N O7 P	0.32	529.317	530.324	2.168	89.4	2	[M+H]+1	2.85541e+06	1.48388e+06	296400	282480	267633	1.62257e+06	1.51271e+06	2.01346e+06	1.51385e+06	2.38549e+06	1.27762e+06	2.21892e+06	1.09387e+06	946888	947170	2.54471e+06	1.62976e+06	2.24861e+06
LPE 22:5	C27 H46 N O7 P	0.53	527.301	528.309	1.978	86	2	[M+H]+1	8.93539e+06	4.86715e+06	876598	725289	728617	2.25994e+06	5.36744e+06	6.07157e+06	3.8372e+06	5.87509e+06	3.92521e+06	6.06708e+06	6.33053e+06	5.70546e+06	3.73021e+06	7.19767e+06	5.73634e+06	7.10095e+06
LPE 24:6	C29 H48 N O7 P	1.3	553.318	552.31	3.17	75.3	2	[M-H]-1	8024.53	17304.9	8686.51	20352.3	22694.2	22306.1	45898.5	7331.58	45753.8	7242.33	7408.23	7091.14	514294	9820.32	21451.8	6796.62	7636.36	7282.19
LPE 34:1	C39 H78 N O7 P	-1.19	703.551	704.558	10.411	93.5	2	[M+H]+1	9.62999e+06	8.74428e+06	243121	8.87206e+06	9.9138e+06	8.86428e+06	1.03952e+07	8.18883e+06	8.25316e+06	8.82165e+06	9.68704e+06	1.31096e+07	1.34911e+07	1.40842e+07	4.53255e+06	1.87723e+07	1.8016e+07	1.93443e+07
LPE 36:4	C41 H76 N O7 P	-0.32	725.536	726.543	8.623	96.2	2	[M+H]+1	1.45328e+07	1.5115e+07	1.9254e+07	1.37928e+07	1.42357e+07	1.623e+07	1.72021e+07	1.88111e+07	3.38508e+07	1.8074e+07	2.15477e+07	3.09523e+07	2.44843e+07	2.23684e+07	1.72252e+07	3.79355e+07	4.08105e+07	6.26276e+07
LPE 36:5	C41 H74 N O7 P	-0.23	723.52	724.527	7.466	87.5	2	[M+H]+1	5.89249e+06	5.32742e+06	3.05988e+06	5.48185e+06	7.00545e+06	3.92374e+06	6.83337e+06	7.33721e+06	1.62172e+06	6.88359e+06	6.25672e+06	1.72208e+07	8.26867e+06	6.814e+06	7.23795e+06	9.95895e+06	8.84378e+06	1.26744e+07
LPE 38:4	C43 H80 N O7 P	0.06	753.567	754.575	10.607	95.1	2	[M+H]+1	2.01399e+07	2.02089e+07	223483	1.36305e+07	1.39194e+07	2.33551e+07	2.48846e+07	2.48661e+07	2.66167e+07	3.55456e+07	2.66172e+07	3.89844e+07	3.13214e+07	2.86683e+07	2.97141e+07	4.7751e+07	5.64234e+07	4.16873e+07
LPE 38:5	C43 H78 N O7 P	0.12	751.552	752.559	8.686	97.2	2	[M+H]+1	3.65026e+07	3.83671e+07	4.84475e+07	3.21885e+07	3.32169e+07	4.28597e+07	4.54846e+07	2.72083e+07	4.4045e+07	3.52762e+07	4.02873e+07	5.03423e+07	4.599e+07	4.89489e+07	5.35627e+07	5.70151e+07	3.08849e+06	6.164e+07
LPE 38:6	C43 H76 N O7 P	3.39	749.538	750.546	8.096	80.8	2	[M+H]+1	1.30185e+07	3.54636e+07	3.03565e+07	2.17781e+07	2.13284e+07	2.30942e+07	4.48758e+07	2.1167e+07	2.10941e+07	1.11978e+07	1.85956e+07	5.17877e+07	4.74504e+07	2.87659e+07	2.61604e+07	5.29297e+07	3.74487e+07	3.20737e+07
LPE 40:1	C45 H90 N O7 P	-2.46	787.644	788.651	15.926	86.4	2	[M+H]+1	6.22821e+06	6.12469e+06	170546	302320	289870	3.5171e+06	3.73583e+06	3.50491e+06	4.29884e+06	5.38093e+06	5.73958e+06	3.92323e+06	4.31999e+06	8.70787e+06	2.24031e+06	3.97872e+06	7.91796e+06	9.46054e+06
LPE 40:3	C45 H86 N O7 P	-1.84	783.613	784.62	13.664	81.6	2	[M+H]+1	1.14789e+06	395323	151271	1.1226e+06	261752	493880	980236	528323	505270	599718	853677	1.45021e+06	225849	1.04519e+06	567157	1.4881e+06	685187	1.70463e+06
LPE 40:5	C45 H82 N O7 P	0.62	779.583	780.591	10.617	88.7	2	[M+H]+1	312218	726860	155855	1.5301e+07	1.6522e+07	458040	312788	271770	292081	277888	264697	5.15838e+06	1.58207e+06	296718	778613	6.34859e+06	336391	298229
LPE O-16:1	C21 H44 N O6 P	-0.07	437.291	436.283	3.789	79.3	2	[M-H]-1	13081.4	4.99999e+06	4.62173e+06	8.48481e+06	1.29877e+07	1.62145e+07	5.9907e+06	3.45189e+06	5.24286e+06	2.60785e+06	1.78457e+06	5.69594e+06	9.01586e+06	9.73487e+06	3.55488e+06	3.03949e+06	2.87115e+06	2.99191e+06
LPE O-17:1	C22 H46 N O6 P	0.38	451.306	450.299	4.317	75.5	2	[M-H]-1	11601.5	626971	603782	646954	636073	656291	327577	337520	195545	790503	181642	1.07948e+06	194611	638067	1.01606e+06	1.02166e+06	257224	318678
LPE O-18:0	C23 H50 N O6 P	0.57	467.338	466.331	4.941	79.4	2	[M-H]-1	22235.5	367833	301872	354987	377212	359953	373352	633909	245769	457833	525463	488075	900155	507316	913296	752750	483340	1.01579e+06
LPE O-18:1	C23 H48 N O6 P	0.39	465.322	464.315	4.743	76.2	2	[M-H]-1	2311.92	1.10053e+06	939423	1.36997e+06	1.46338e+06	1.19826e+06	1.13245e+06	1.55832e+06	871385	1.60906e+06	948421	2.07235e+06	1.59933e+06	1.07555e+06	1.8681e+06	1.60281e+06	841295	1.32503e+06
LPE O-18:2	C23 H46 N O6 P	0.58	463.307	462.299	4.052	77.2	2	[M-H]-1	9431.67	3.44767e+06	2.15535e+06	4.23737e+06	4.22548e+06	2.80705e+06	2.94653e+06	3.90518e+06	1.62e+06	3.54867e+06	2.57975e+06	3.39089e+06	1.77331e+06	4.39331e+06	4.58574e+06	4.28592e+06	1.60898e+06	2.71243e+06
PC 14:0_14:0	C36 H72 N O8 P	0.23	677.5	678.507	5.331	73.3	2	[M+H]+1	5.31879e+07	7.03404e+07	6.22513e+07	5.62668e+07	6.11158e+07	7.76847e+07	9.15378e+07	4.44683e+07	3.5106e+07	3.6827e+07	3.73709e+07	7.03156e+07	9.43883e+07	7.32452e+07	5.70034e+07	7.22742e+07	5.84005e+07	5.35608e+07
PC 15:0_15:0	C38 H76 N O8 P	0.22	705.531	706.538	6.661	73.7	2	[M+H]+1	1.64766e+09	2.32524e+09	1.8234e+09	1.43738e+09	1.40021e+09	2.32828e+09	2.74022e+09	1.35651e+09	1.1047e+09	9.671e+08	1.19074e+09	2.5461e+09	2.88591e+09	2.10908e+09	2.0445e+09	2.36944e+09	1.80199e+09	1.77195e+09
PC 16:1_16:1	C40 H76 N O8 P	0.05	729.531	730.538	6.503	72.7	2	[M+H]+1	1.55728e+08	1.91454e+08	1.80515e+08	1.40144e+08	1.61474e+08	2.25534e+08	2.07138e+08	1.41183e+08	1.46175e+08	1.20267e+08	1.45924e+08	2.10477e+08	2.2061e+08	1.65202e+08	2.22898e+08	1.95452e+08	1.69768e+08	1.66071e+08
PC 17:0_17:0	C42 H84 N O8 P	-0.05	761.593	762.601	10.269	73.4	2	[M+H]+1	5.59343e+08	6.94488e+08	263616	6.62376e+08	6.31269e+08	6.4396e+08	7.82186e+08	3.95112e+08	2.75028e+08	2.9121e+08	2.72606e+08	7.11515e+08	7.00525e+08	5.14887e+08	4.36618e+08	6.646e+08	4.61048e+08	4.65574e+08
PC 17:1_17:1	C42 H80 N O8 P	0.05	757.562	758.569	7.227	72.8	2	[M+H]+1	3.54314e+09	4.25577e+09	5.08653e+09	3.87447e+09	3.9087e+09	4.24934e+09	4.92703e+09	2.8425e+09	2.36441e+09	2.10799e+09	2.38696e+09	4.58877e+09	4.28093e+09	3.13159e+09	3.79382e+09	4.36498e+09	3.25687e+09	3.13897e+09
PC 17:2_17:2	C42 H76 N O8 P	-0.4	753.531	754.538	5.574	72.5	2	[M+H]+1	1.56757e+07	1.23496e+07	1.3465e+07	1.13929e+07	1.10913e+07	1.61294e+07	1.33025e+07	5.47431e+06	6.80199e+06	6.3831e+06	8.01941e+06	1.30965e+07	1.10604e+07	1.30932e+07	1.11974e+07	7.31159e+06	7.79456e+06	7.96573e+06
PC 18:1_18:1	C44 H84 N O8 P	-0.16	785.593	786.601	8.74	77.4	2	[M+H]+1	5.25512e+09	5.73233e+09	9.66091e+09	5.24155e+09	5.21611e+09	5.42757e+09	6.58193e+09	4.20833e+09	2.99194e+09	3.27989e+09	2.96266e+09	5.0666e+09	5.47359e+09	3.72846e+09	2.4253e+09	5.10407e+09	4.16338e+09	5.30137e+09
PC 18:2_18:2	C44 H80 N O8 P	-0.35	781.562	782.569	7.885	72.5	2	[M+H]+1	7.36177e+08	1.16824e+09	1.16189e+09	9.62889e+08	9.48504e+08	1.39372e+09	1.14203e+09	5.28493e+08	6.57511e+08	3.5431e+08	6.3725e+08	9.99554e+08	9.02299e+08	7.05436e+08	1.03359e+09	8.42406e+08	7.38639e+08	6.52188e+08
PC 18:3_18:3	C44 H76 N O8 P	1.69	777.532	778.539	5.238	77	2	[M+H]+1	1.38931e+06	508024	7.79852e+06	3.37544e+06	3.35547e+06	6.49449e+06	5.32695e+06	5.24268e+06	720151	462185	520831	9.74707e+06	7.5627e+06	501323	4.3733e+06	3.96237e+06	519244	454199
PC 19:1_19:1	C46 H88 N O8 P	-0.21	813.625	814.632	10.592	73.8	2	[M+H]+1	4.53478e+08	4.88827e+08	452109	3.59179e+08	3.62862e+08	4.26713e+08	6.05575e+08	3.02183e+08	2.10673e+08	2.35228e+08	2.08716e+08	3.93305e+08	4.38558e+08	3.79706e+08	3.05417e+08	3.9272e+08	3.12209e+08	3.04796e+08
PC 19:2_19:2	C46 H84 N O8 P	0.31	809.594	810.601	8.193	73.6	2	[M+H]+1	8.04103e+08	1.08167e+09	1.36086e+09	7.97728e+08	7.92037e+08	1.41717e+09	1.15009e+09	5.24861e+08	7.72659e+08	5.23665e+08	7.53661e+08	1.10047e+09	1.11966e+09	8.46405e+08	1.13419e+09	1.01464e+09	8.37e+08	8.25479e+08
PC 20:1_20:1	C48 H92 N O8 P	-0.77	841.655	842.663	12.79	73.2	2	[M+H]+1	3.51664e+07	4.37211e+07	744062	4.65281e+07	4.85201e+07	3.79312e+07	5.64049e+07	2.09019e+07	1.87159e+07	1.89274e+07	1.752e+07	3.19863e+07	3.66127e+07	3.24332e+07	2.19245e+07	3.10426e+07	2.66121e+07	2.75791e+07
PC 20:2_20:2	C48 H88 N O8 P	-0.53	837.624	838.632	10.137	73.3	2	[M+H]+1	7.24907e+07	1.0162e+08	715584	8.79284e+07	8.94424e+07	1.25318e+08	1.13288e+08	4.57778e+07	4.43103e+07	3.15929e+07	4.57862e+07	9.89202e+07	8.24535e+07	5.89665e+07	7.23478e+07	7.76462e+07	5.4719e+07	5.52644e+07
PC 20:3_20:3	C48 H84 N O8 P	-0.18	833.593	834.601	7.221	73.3	2	[M+H]+1	2.65361e+08	4.32891e+08	4.6884e+08	3.93982e+08	3.98425e+08	4.78128e+08	4.40566e+08	1.93508e+08	2.21274e+08	1.4821e+08	2.31149e+08	4.32368e+08	4.36831e+08	3.28541e+08	3.31361e+08	3.29535e+08	2.44824e+08	2.44957e+08
PC 20:4_20:4	C48 H80 N O8 P	0.02	829.562	830.569	5.677	73.9	2	[M+H]+1	7.34949e+06	1.19971e+07	1.42741e+07	1.14972e+07	1.10962e+07	1.73977e+07	1.12827e+07	5.916e+06	9.03143e+06	4.73723e+06	9.01216e+06	1.43153e+07	1.26322e+07	1.04776e+07	1.15859e+07	9.52476e+06	8.54909e+06	8.58941e+06
PC 21:1_21:1	C50 H96 N O8 P	-0.88	869.687	870.694	14.693	72	2	[M+H]+1	8.69466e+06	1.14741e+07	354691	2.21353e+07	2.31459e+07	1.53435e+07	1.72954e+07	4.84318e+06	5.82685e+06	1.03439e+06	7.04929e+06	9.37646e+06	1.13227e+07	593698	4.67776e+06	5.55063e+06	6.92583e+06	9.71283e+06
PC 22:6_22:6	C52 H80 N O8 P	-0.76	877.561	878.569	5.13	71.5	2	[M+H]+1	1.62633e+06	1.96015e+06	1.91589e+06	1.62956e+06	1.62419e+06	3.24426e+06	1.84021e+06	1.22824e+06	1.69509e+06	1.15123e+06	1.59486e+06	2.47836e+06	2.22659e+06	1.94722e+06	2.05931e+06	1.77212e+06	1.68059e+06	1.56562e+06
PC O-16:1	C24 H48 N O7 P	0.88	493.317	494.325	2.073	84.1	2	[M+H]+1	6.87248e+06	2.98663e+06	354631	431206	118565	4.7014e+06	3.938e+06	6.41756e+06	2.38931e+06	2.06755e+06	2.23192e+06	1.24319e+06	4.15757e+06	3.22011e+06	2.91143e+06	1.32583e+06	3.64537e+06	1.17976e+06
PC O-18:1	C26 H52 N O7 P	0.43	521.348	522.356	2.208	88	2	[M+H]+1	6.24803e+07	1.8985e+07	1.42593e+07	1.04264e+07	1.1001e+07	1.7436e+07	3.12409e+07	6.01323e+07	1.80965e+07	5.30665e+07	1.72883e+07	2.51933e+07	3.29643e+07	2.07368e+07	2.20736e+07	3.31219e+07	2.33031e+07	2.60837e+07
PC O-20:4	C28 H50 N O7 P	0.21	543.333	544.34	1.967	84.3	2	[M+H]+1	1.51796e+06	714505	244314	40216.7	177647	1.70503e+06	1.19799e+06	2.80933e+06	744852	1.173e+06	472163	943030	846052	993599	841971	1.12173e+06	1.84878e+06	1.02455e+06
PC O-26:0	C34 H70 N O7 P	0.36	635.489	636.496	5.012	72.8	2	[M+H]+1	292223	822591	2.81572e+06	1.38625e+06	968341	1.33099e+06	1.53917e+06	172492	777519	169119	729367	1.46632e+06	1.41361e+06	1.61104e+06	835004	1.0488e+06	973992	336097
PC O-29:0	C37 H76 N O7 P	-0.1	677.536	678.543	6.908	87.4	2	[M+H]+1	6.84461e+06	1.13002e+07	1.15857e+07	1.06973e+07	1.10763e+07	6.59967e+06	1.22157e+07	6.07104e+06	4.56922e+06	4.17621e+06	4.26729e+06	1.14397e+07	1.12352e+07	9.20494e+06	6.987e+06	1.04436e+07	8.1317e+06	7.0151e+06
PC O-29:1	C37 H74 N O7 P	0.8	675.521	676.528	6.693	79.2	2	[M+H]+1	5.37193e+06	6.95914e+06	6.31254e+06	4.05352e+06	4.34686e+06	5.96358e+06	7.96776e+06	4.5786e+06	3.49778e+06	3.03352e+06	4.90423e+06	7.43046e+06	8.05003e+06	5.39734e+06	6.88089e+06	1.02209e+07	5.07278e+06	5.37317e+06
PC O-30:0	C38 H78 N O7 P	0.37	691.552	692.559	7.815	86.2	2	[M+H]+1	2.27549e+08	3.87707e+08	4.52961e+08	4.25497e+08	4.34444e+08	3.34613e+08	4.74458e+08	1.04582e+08	2.3972e+08	1.79316e+08	2.26482e+08	3.75557e+08	4.42765e+08	7.81249e+07	3.17153e+08	3.16405e+06	3.79384e+08	3.82051e+08
PC O-30:1	C38 H76 N O7 P	0.07	689.536	690.543	7.513	75.6	2	[M+H]+1	1.45665e+08	2.05674e+08	2.34312e+08	2.12521e+08	1.56352e+08	1.44634e+08	2.35478e+08	1.2395e+08	8.22492e+07	8.71557e+07	8.22073e+07	2.09483e+08	2.11494e+08	1.43565e+08	1.33177e+08	1.94491e+08	1.3493e+08	1.46586e+08
PC O-31:0	C39 H80 N O7 P	0.35	705.567	706.575	8.595	87.3	2	[M+H]+1	6.78859e+06	6.04747e+07	1.03611e+08	6.22008e+07	5.88956e+07	6.0568e+07	7.5831e+07	3.8943e+07	4.06274e+07	3.43071e+07	4.6161e+07	6.66421e+07	7.19667e+07	6.44619e+07	6.23276e+07	7.49977e+07	6.57167e+07	6.97004e+07
PC O-31:1	C39 H78 N O7 P	0.86	703.552	704.559	8.335	79	2	[M+H]+1	6.38834e+07	7.43395e+07	9.21908e+07	7.00124e+07	6.83898e+07	5.44349e+07	6.88659e+07	6.16336e+07	4.63855e+07	5.77575e+07	4.96915e+07	8.02544e+07	7.27171e+07	6.55875e+07	6.20151e+07	7.92955e+07	6.13995e+07	6.49461e+07
PC O-32:0	C40 H82 N O7 P	0.42	719.583	720.591	9.653	86.7	2	[M+H]+1	3.21682e+08	6.13086e+08	349378	5.07617e+08	5.10938e+08	4.62005e+08	7.30913e+08	2.66543e+08	2.51493e+08	1.87278e+08	2.4886e+08	5.28109e+08	5.97616e+08	4.34625e+08	4.01924e+08	6.54551e+08	4.68404e+08	4.64092e+08
PC O-32:1	C40 H80 N O7 P	0.86	717.568	718.575	8.211	86.5	2	[M+H]+1	8.14562e+08	1.11753e+09	4.54162e+08	2.93462e+08	9.87815e+08	7.7853e+08	1.34164e+09	7.24487e+08	5.08813e+08	5.1615e+08	5.05007e+08	1.23834e+09	1.2682e+09	7.51744e+08	7.96503e+08	1.51863e+09	8.4735e+08	8.10096e+08
PC O-32:1	C40 H80 N O7 P	-0.05	717.567	718.575	7.988	86.2	2	[M+H]+1	1.43893e+08	4.15249e+08	3.18569e+08	1.53726e+08	1.65148e+08	3.25228e+08	5.02549e+08	1.51874e+08	8.1796e+07	9.79332e+07	1.59534e+08	2.30005e+08	3.1998e+08	3.71992e+08	1.14399e+08	6.80109e+08	1.41111e+08	3.15921e+08
PC O-32:2	C40 H78 N O7 P	0.59	715.552	716.559	7.893	77.9	2	[M+H]+1	5.0959e+08	5.20063e+08	5.10415e+08	3.93795e+08	3.84786e+08	5.11881e+08	5.92025e+08	4.02497e+08	3.0421e+08	3.58529e+08	4.036e+07	5.17402e+08	5.42701e+08	4.42982e+08	4.80373e+08	1.36353e+07	4.42123e+08	4.43788e+08
PC O-33:0	C41 H84 N O7 P	0.88	733.599	734.606	10.62	77.7	2	[M+H]+1	8.7051e+06	1.35716e+07	423089	1.04999e+07	1.06466e+07	1.15985e+07	1.46383e+07	6.20884e+06	5.3546e+06	5.02624e+06	5.51134e+06	8.76053e+06	1.3206e+07	1.02862e+07	8.43582e+06	1.24118e+07	5.55858e+06	1.00046e+07
PC O-33:1	C41 H82 N O7 P	0.62	731.583	732.591	8.9	87.3	2	[M+H]+1	7.08238e+07	1.14807e+08	1.91329e+08	1.00719e+08	1.00511e+08	9.1663e+07	1.41135e+08	5.39814e+07	5.3703e+07	3.81408e+07	4.69353e+07	1.02469e+08	1.2472e+08	7.45419e+07	7.59395e+07	1.10819e+08	8.39394e+07	8.34353e+07
PC O-34:0	C42 H86 N O7 P	-0.03	747.614	748.621	11.825	86.2	2	[M+H]+1	3.7189e+07	7.74113e+07	460830	9.51092e+06	7.65399e+07	5.15535e+07	7.98419e+07	2.67565e+07	2.4919e+07	1.92649e+07	2.51698e+07	6.19027e+07	7.06924e+07	5.75778e+07	3.66871e+07	6.35293e+07	4.60991e+07	4.8642e+07
PC O-34:1	C42 H84 N O7 P	0.19	745.599	746.606	9.873	86.6	2	[M+H]+1	6.314e+08	9.16827e+08	387868	9.36545e+08	1.07472e+09	7.89076e+08	1.30831e+09	4.24726e+08	4.15e+08	2.28989e+08	3.81393e+08	3.89878e+08	8.50819e+08	7.23522e+08	6.09818e+08	1.038e+09	5.25399e+08	7.02439e+08
PC O-34:2	C42 H82 N O7 P	-0.8	743.582	744.59	8.348	86.6	2	[M+H]+1	9.88078e+08	1.15168e+09	1.47617e+08	7.77393e+08	8.9986e+08	1.03169e+09	1.30616e+09	8.95437e+08	4.72657e+08	4.39492e+08	4.88902e+08	1.03284e+09	9.17935e+08	7.68266e+08	8.72451e+08	1.03362e+09	7.65902e+08	7.66889e+08
PC O-35:1	C43 H86 N O7 P	0.32	759.614	760.622	11.009	87.8	2	[M+H]+1	1.96745e+07	3.40099e+07	547633	3.14162e+07	3.21624e+07	2.49288e+07	4.06966e+07	1.51379e+07	1.35583e+07	9.7531e+06	1.31032e+07	2.91492e+07	3.34974e+07	2.48345e+07	2.03964e+07	3.31167e+07	2.22843e+07	2.26989e+07
PC O-35:2	C43 H84 N O7 P	0.18	757.599	758.606	10.487	73.3	2	[M+H]+1	3.0554e+07	2.26186e+07	510081	1.92852e+07	1.80317e+07	2.72661e+07	4.14251e+07	2.60435e+07	1.40231e+07	1.80402e+07	1.53901e+07	3.62451e+07	2.02631e+07	2.7018e+07	2.14024e+07	3.20978e+07	2.5218e+07	2.43643e+07
PC O-36:0	C44 H90 N O7 P	-0.68	775.645	776.652	14.035	80.3	2	[M+H]+1	7.03252e+06	1.8498e+07	457215	2.23685e+07	2.29771e+07	9.65428e+06	1.71517e+07	4.06432e+06	5.32319e+06	4.03515e+06	5.91941e+06	1.15208e+07	1.3208e+07	1.13601e+07	5.94945e+06	1.22682e+07	1.01572e+07	8.4692e+06
PC O-36:1	C44 H88 N O7 P	-0.86	773.629	774.636	12.059	87.6	2	[M+H]+1	1.05377e+08	2.07495e+08	595109	2.04886e+08	2.05659e+08	1.45734e+08	2.44796e+08	8.11428e+07	6.72586e+07	4.20142e+07	6.90528e+07	1.53624e+08	1.79265e+08	7.8041e+07	1.09672e+08	1.7474e+08	1.41292e+08	1.33168e+08
PC O-36:2	C44 H86 N O7 P	-1.37	771.613	772.62	10.144	87.3	2	[M+H]+1	2.88114e+08	3.01797e+08	405958	2.37142e+08	2.36103e+08	1.98838e+08	3.67378e+08	2.06349e+08	8.85187e+07	2.6555e+07	3.07419e+07	1.15502e+08	2.76259e+07	2.14752e+08	1.92394e+08	2.9882e+08	1.55323e+08	1.80637e+08
PC O-36:3	C44 H84 N O7 P	0.03	769.599	770.606	8.864	87.6	2	[M+H]+1	1.95556e+08	2.65106e+08	2.11697e+08	2.03826e+08	2.09473e+08	2.25207e+08	3.37004e+08	1.34163e+08	1.28091e+08	1.28987e+08	1.27691e+08	2.24098e+08	2.2551e+08	1.95344e+08	2.02678e+08	2.4294e+08	1.82927e+08	1.85408e+08
PC O-36:4	C44 H82 N O7 P	-0.2	767.583	768.59	8.098	83.3	2	[M+H]+1	1.42576e+08	2.56425e+08	2.74568e+08	1.71e+08	1.69396e+08	2.58405e+08	1.75451e+08	9.2189e+07	1.1979e+08	6.59418e+07	1.08889e+08	2.16743e+08	1.51521e+08	1.27074e+08	1.72725e+08	2.18901e+08	1.5288e+08	1.41421e+08
PC O-36:5	C44 H80 N O7 P	-0.59	765.567	766.574	6.98	71.9	2	[M+H]+1	3.43467e+07	6.76554e+07	7.48064e+07	6.31423e+07	6.5079e+07	5.87028e+07	4.43695e+07	2.43741e+07	1.9778e+07	1.00779e+07	2.8697e+07	6.33219e+07	2.79849e+07	2.32902e+07	5.11653e+07	2.68085e+07	4.52581e+07	4.68822e+07
PC O-38:0	C46 H94 N O7 P	-1.36	803.676	804.683	15.82	87.4	2	[M+H]+1	4.91203e+06	1.49417e+07	564785	2.66276e+07	2.85065e+07	9.10148e+06	1.38933e+07	3.02335e+06	4.78331e+06	2.564e+06	4.78051e+06	9.36693e+06	9.44228e+06	1.38962e+07	3.94785e+06	1.04044e+07	1.16054e+07	1.24886e+07
PC O-38:1	C46 H92 N O7 P	-0.72	801.661	802.668	14.193	89.8	2	[M+H]+1	2.514e+07	4.67276e+07	624785	5.72327e+07	6.4863e+07	2.97556e+07	5.49279e+07	1.67007e+07	1.8512e+07	1.44029e+07	1.95835e+07	3.28202e+07	4.26724e+07	3.75956e+07	2.15989e+07	4.04629e+07	3.27371e+07	3.46339e+07
PC O-38:2	C46 H90 N O7 P	-0.6	799.645	800.652	12.359	86.6	2	[M+H]+1	3.28281e+07	5.757e+07	1.30705e+06	4.22722e+07	3.81062e+07	3.72927e+07	6.99867e+07	2.21733e+07	2.08663e+07	1.54933e+07	1.97506e+07	4.46539e+07	5.44508e+07	3.73053e+07	2.65237e+07	4.15905e+07	3.80496e+07	3.82155e+07
PC O-38:3	C46 H88 N O7 P	-0.41	797.63	798.637	11.011	87	2	[M+H]+1	1.63354e+07	2.78281e+07	383446	1.85396e+07	1.91634e+07	2.67461e+07	3.38174e+07	1.12731e+07	1.56576e+07	8.79619e+06	1.46244e+07	2.45644e+07	2.26692e+07	1.81452e+07	2.16004e+07	2.41234e+07	1.84063e+07	1.87613e+07
PC O-38:4	C46 H86 N O7 P	-0.96	795.613	796.621	9.099	81.7	2	[M+H]+1	5.50882e+07	4.72795e+07	3.52447e+07	1.1903e+08	1.05493e+08	8.91079e+07	1.1613e+08	4.05718e+07	3.96332e+07	3.08265e+07	3.67519e+07	1.09738e+08	4.51739e+07	6.07877e+07	6.86401e+07	9.5046e+07	6.6191e+07	6.78533e+07
PC O-38:5	C46 H84 N O7 P	0.06	793.599	794.606	8.206	86.1	2	[M+H]+1	1.7102e+08	2.4592e+08	2.98315e+08	2.19956e+08	1.88516e+08	2.71815e+08	3.05728e+08	9.01981e+07	1.09493e+08	6.76716e+07	1.09156e+08	1.93742e+08	1.71434e+08	1.16402e+08	1.75329e+08	1.90688e+08	1.27855e+08	1.2256e+08
PC O-38:6	C46 H82 N O7 P	-0.49	791.582	792.59	7.9	80.9	2	[M+H]+1	3.88788e+08	5.19103e+08	5.56306e+08	3.9303e+08	3.8517e+08	6.08652e+08	5.99021e+08	2.42885e+08	2.66379e+08	2.01057e+08	2.52884e+08	3.91893e+08	3.61547e+08	2.83668e+08	4.01126e+08	2.90241e+08	2.99713e+08	2.84523e+08
PC O-38:7	C46 H80 N O7 P	0.62	789.568	790.575	6.843	77.2	2	[M+H]+1	1.40077e+07	1.18759e+07	1.51873e+07	1.1208e+07	1.21313e+07	1.44997e+07	1.76393e+07	967595	1.03538e+07	373050	1.0765e+07	8.80312e+06	1.44285e+07	715210	1.29787e+06	2.02713e+06	6.90926e+06	7.69135e+06
PC O-39:8	C47 H80 N O7 P	-2.91	801.565	802.572	11.801	88.1	2	[M+H]+1	5.52708e+06	2.9759e+06	194252	6.74871e+06	6.83195e+06	4.12773e+06	3.32575e+06	4.5904e+06	2.64422e+06	2.00645e+06	2.01196e+06	3.06421e+06	5.10211e+06	4.47318e+06	2.49193e+06	2.33356e+06	3.71814e+06	3.22748e+06
PC O-40:1	C48 H96 N O7 P	-0.82	829.692	830.699	15.969	89.9	2	[M+H]+1	1.05755e+06	1.40206e+07	490075	2.62098e+07	1.5691e+07	9.94447e+06	1.4919e+07	792571	7.73982e+06	8.91515e+06	8.10862e+06	1.071e+07	1.32344e+07	1.70395e+07	5.99223e+06	1.22946e+07	1.61302e+07	1.60532e+07
PC O-40:4	C48 H90 N O7 P	-0.29	823.645	824.653	11.546	87.8	2	[M+H]+1	1.06976e+07	1.92801e+07	707446	1.38836e+07	1.30646e+07	1.80713e+07	2.2005e+07	4.92252e+06	3.97527e+06	2.538e+06	7.06329e+06	1.45005e+07	1.27991e+07	9.27603e+06	9.24121e+06	1.28008e+07	1.01169e+07	6.20228e+06
PC O-40:5	C48 H88 N O7 P	-0.09	821.63	822.637	10.143	86.1	2	[M+H]+1	3.19466e+07	5.66332e+07	284350	5.412e+07	5.34384e+07	4.89281e+07	6.14094e+07	1.60868e+07	1.5481e+07	1.00893e+07	1.61252e+07	4.24922e+07	4.50883e+07	2.7528e+07	2.90093e+07	3.77086e+07	2.59589e+07	2.57881e+07
PC O-40:6	C48 H86 N O7 P	-0.14	819.614	820.621	8.296	88.5	2	[M+H]+1	7.58721e+07	1.04442e+08	4.56692e+07	9.69503e+07	9.5917e+07	9.19808e+07	1.14182e+08	3.95415e+07	4.02162e+07	3.22585e+07	4.47193e+07	4.02552e+07	6.53707e+07	5.15341e+07	5.95657e+07	5.19893e+07	5.04248e+07	5.31173e+07
PC O-40:7	C48 H84 N O7 P	-0.11	817.598	818.606	7.849	88.3	2	[M+H]+1	6.28958e+07	1.65179e+08	1.8761e+08	1.47885e+08	1.5171e+08	1.64969e+08	1.27625e+08	6.62422e+07	6.78618e+07	5.15452e+07	6.88549e+07	1.158e+08	1.16401e+08	7.08986e+07	7.09365e+07	1.04604e+08	8.71283e+07	8.29375e+07
PC O-40:8	C48 H82 N O7 P	-0.2	815.583	816.59	7.468	72.7	2	[M+H]+1	2.19825e+07	2.84586e+07	3.12321e+07	2.92326e+07	2.05037e+07	2.76035e+07	3.43017e+07	1.07789e+07	1.05411e+07	8.33738e+06	1.10777e+07	2.04159e+07	1.93617e+07	1.49082e+07	1.54273e+07	1.68681e+07	1.35853e+07	1.34354e+07
PE 10:0_32:7	C47 H80 N O8 P	0.49	817.563	818.57	8.828	85.8	2	[M+H]+1	4.68212e+06	5.71792e+06	9.03166e+06	4.28848e+06	3.58535e+06	8.31508e+06	7.75051e+06	2.75855e+06	3.97336e+06	2.1084e+06	3.33556e+06	4.94668e+06	5.58886e+06	4.92434e+06	4.6179e+06	4.7334e+06	3.84329e+06	4.17192e+06
PE 14:1_26:6	C45 H76 N O8 P	0.12	789.531	790.538	7.158	89.9	2	[M+H]+1	7.49224e+07	8.9967e+07	1.02354e+08	8.44849e+07	8.5622e+07	1.14955e+08	1.0453e+08	4.77985e+07	5.46632e+07	4.4942e+07	5.66429e+07	7.25246e+07	7.63449e+07	7.04086e+07	7.18933e+07	6.73788e+07	5.46705e+07	5.8549e+07
PE 16:0_16:0	C37 H74 N O8 P	0.34	691.515	692.523	8.785	84.6	2	[M+H]+1	1.20232e+07	1.49658e+07	2.66356e+07	1.41545e+07	1.0311e+07	1.5869e+07	1.57538e+07	1.17506e+07	8.56736e+06	1.03522e+07	8.52047e+06	1.4211e+07	1.57081e+07	1.25055e+07	9.71609e+06	1.29606e+07	1.26811e+07	1.74031e+07
PE 16:0_16:1	C37 H72 N O8 P	0.36	689.5	690.507	7.298	88.5	2	[M+H]+1	2.81676e+07	6.04391e+07	3.83629e+07	3.55212e+07	3.41499e+07	5.50087e+07	4.9451e+07	2.43536e+07	2.47157e+07	2.11733e+07	2.53413e+07	6.03047e+07	5.34486e+07	4.59381e+07	4.17826e+07	4.47499e+07	3.64659e+07	3.99304e+07
PE 16:0_17:1	C38 H74 N O8 P	-0.46	703.515	704.522	8.128	75.4	2	[M+H]+1	2.11212e+07	3.11666e+07	2.62668e+07	2.16633e+07	2.1646e+07	2.29407e+07	3.28397e+07	1.7648e+07	1.71663e+07	1.49252e+07	1.4932e+07	3.84303e+07	3.8379e+07	3.24218e+07	2.07144e+07	2.88305e+07	2.77345e+07	2.40275e+07
PE 16:0_18:1	C39 H76 N O8 P	0.67	717.531	718.539	9.029	92.6	2	[M+H]+1	5.97927e+08	7.60408e+08	1.14501e+09	6.88475e+08	6.76951e+08	7.21838e+08	8.8166e+08	5.08351e+08	4.40002e+08	4.69935e+08	4.57947e+08	7.25286e+08	8.19021e+08	6.67229e+08	5.93955e+08	6.92517e+08	6.39252e+08	6.42803e+08
PE 16:0_18:3	C39 H72 N O8 P	-0.11	713.499	714.507	6.305	77	2	[M+H]+1	1.48114e+06	1.89547e+06	2.98234e+06	2.82921e+06	2.91583e+06	1.2324e+06	1.84999e+06	830834	1.33941e+06	766372	1.20442e+06	1.97878e+06	2.15239e+06	1.99683e+06	1.07042e+06	1.62464e+06	1.77708e+06	1.81513e+06
PE 16:0_20:3	C41 H76 N O8 P	1.86	741.532	740.525	10.246	70.2	2	[M-H]-1	3.73013e+06	4.1328e+06	4.40116e+06	4.88938e+06	4.7658e+06	4.66366e+06	4.43388e+06	5.42267e+06	2.50819e+06	6.4484e+06	5.45603e+06	6.22259e+06	6.85133e+06	3.79288e+06	6.10557e+06	5.43283e+06	4.29704e+06	5.46163e+06
PE 16:0_20:4	C41 H74 N O8 P	1.86	739.517	738.509	9.518	81.6	2	[M-H]-1	1.36498e+07	1.4578e+07	1.47026e+07	1.6406e+07	1.65571e+07	1.61122e+07	2.05987e+07	2.36139e+07	1.09152e+07	2.46046e+07	2.14883e+07	2.50273e+07	2.85244e+07	1.45336e+07	2.60042e+07	2.20726e+07	1.92847e+07	2.34309e+07
PE 16:0_20:5	C41 H72 N O8 P	1.75	737.501	736.494	8.443	79.6	2	[M-H]-1	2.93696e+06	3.38596e+06	3.49248e+06	3.63365e+06	3.59826e+06	3.67444e+06	4.00413e+06	5.63188e+06	1.99764e+06	5.40562e+06	3.41276e+06	5.21047e+06	6.59731e+06	3.28703e+06	6.45266e+06	5.23005e+06	3.6131e+06	4.91459e+06
PE 16:1_18:1	C39 H74 N O8 P	1.69	715.516	714.509	9.596	85.6	2	[M-H]-1	3.44346e+06	3.81876e+06	4.13755e+06	4.05311e+06	4.30146e+06	4.26453e+06	8.72283e+06	5.25721e+06	4.47241e+06	5.61193e+06	3.91112e+06	5.69209e+06	7.23135e+06	3.91569e+06	4.77781e+06	5.73866e+06	3.54745e+06	5.15118e+06
PE 16:1_22:2	C43 H80 N O8 P	-0.59	769.562	770.569	10.009	79.5	2	[M+H]+1	7.15632e+07	7.33198e+07	458324	8.66761e+07	8.66247e+07	8.81697e+07	8.21099e+07	5.04932e+07	5.65409e+07	5.14075e+07	5.54904e+07	8.11066e+07	6.97611e+07	7.87909e+07	6.3908e+07	7.28241e+07	7.08727e+07	7.08016e+07
PE 17:0_17:0	C39 H78 N O8 P	0.5	719.547	720.554	10.727	84.5	2	[M+H]+1	1.05766e+07	1.11235e+07	234116	1.3404e+07	1.30417e+07	1.12843e+07	1.02735e+07	7.52906e+06	5.55342e+06	8.23193e+06	6.71264e+06	1.21733e+07	9.12336e+06	9.69708e+06	6.69353e+06	1.20154e+07	1.07545e+07	1.20168e+07
PE 17:0_20:3	C42 H78 N O8 P	-1.1	755.546	756.553	9.674	71	2	[M+H]+1	1.47758e+06	2.82344e+06	1.87878e+06	1.9378e+06	2.17778e+06	1.68724e+06	1.61967e+06	1.16712e+06	424155	1.50439e+06	2.11949e+06	1.64804e+06	396956	1.83536e+06	486573	1.68424e+06	512317	1.96303e+06
PE 18:0_17:1	C40 H78 N O8 P	-0.34	731.546	732.554	9.997	84.4	2	[M+H]+1	1.17725e+08	1.5638e+08	1.01003e+08	2.2232e+08	2.21531e+08	1.81654e+08	1.99923e+08	1.18717e+08	1.13524e+08	1.09165e+08	1.13178e+08	2.13248e+08	2.02815e+08	1.36021e+08	1.27865e+08	1.49472e+08	1.28685e+08	1.15057e+08
PE 18:0_17:2	C40 H76 N O8 P	0.53	729.531	730.539	8.368	76.3	2	[M+H]+1	2.61646e+07	3.03549e+07	3.52494e+07	2.60623e+07	1.80803e+07	2.45507e+07	1.0393e+07	2.20914e+07	1.86019e+07	2.05605e+07	2.59464e+06	2.4117e+07	2.35905e+07	2.11546e+07	1.99796e+07	2.99038e+07	2.62709e+07	1.6625e+07
PE 18:0_18:1	C41 H80 N O8 P	0.22	745.562	746.57	11.026	93.4	2	[M+H]+1	5.0487e+08	6.01745e+08	205989	3.03658e+08	2.99834e+08	6.06377e+08	6.63948e+08	4.10363e+08	3.85455e+08	3.64295e+08	3.62154e+08	5.97844e+08	5.29999e+08	5.20875e+08	4.25074e+08	5.32764e+08	5.01234e+08	5.06874e+08
PE 18:0_18:5	C41 H72 N O8 P	0.54	737.5	738.507	6.382	81.2	2	[M+H]+1	1.98969e+07	3.15944e+07	4.294e+07	3.76289e+07	3.75887e+07	2.76607e+07	2.85702e+07	1.82981e+07	2.11314e+07	1.6673e+07	2.02909e+07	3.7286e+07	3.27137e+07	2.71393e+07	2.46023e+07	2.91631e+07	2.84264e+07	2.95356e+07
PE 18:0_20:2	C43 H82 N O8 P	1.37	771.579	770.572	14.012	74.7	2	[M-H]-1	2.06467e+06	2.22754e+06	2.3527e+06	2.36794e+06	2.41633e+06	2.48561e+06	2.01536e+06	1.83462e+06	1.89995e+06	3.13629e+06	2.07335e+06	2.95785e+06	2.92259e+06	1.91609e+06	1.65716e+06	2.61238e+06	1.67669e+06	2.50877e+06
PE 18:0_20:3	C43 H80 N O8 P	1.38	769.563	768.556	12.817	80.7	2	[M-H]-1	5.69028e+06	6.37409e+06	6.36279e+06	5.0617e+06	5.0134e+06	4.88438e+06	4.06807e+06	4.19944e+06	2.95112e+06	4.70147e+06	3.99592e+06	4.50124e+06	5.56627e+06	4.257e+06	4.62126e+06	4.24618e+06	3.46341e+06	4.42922e+06
PE 18:0_20:4	C43 H78 N O8 P	1.46	767.548	766.54	11.413	83.1	2	[M-H]-1	6.76261e+07	7.57882e+07	7.67498e+07	7.82794e+07	7.90618e+07	7.65668e+07	7.13422e+07	8.14066e+07	4.63916e+07	8.52928e+07	7.63175e+07	9.09511e+07	9.96146e+07	6.82657e+07	8.57869e+07	7.64806e+07	6.11766e+07	8.31891e+07
PE 18:0_20:5	C43 H76 N O8 P	0	765.531	766.538	7.63	83.5	2	[M+H]+1	3.13456e+08	3.62657e+08	3.61038e+08	3.47398e+08	3.50188e+08	4.14586e+08	3.88567e+08	2.79441e+08	2.75425e+08	2.56121e+08	2.67187e+08	4.03297e+08	3.67479e+08	3.30854e+08	3.65399e+08	3.63228e+08	3.24575e+08	3.19937e+08
PE 18:0_22:4	C45 H82 N O8 P	1.59	795.579	794.572	12.786	81.1	2	[M-H]-1	3.87737e+06	4.44984e+06	4.43617e+06	3.57905e+06	3.652e+06	3.31129e+06	5.39933e+06	6.07101e+06	2.72873e+06	5.07083e+06	8.89701e+06	5.86582e+06	6.95367e+06	3.03775e+06	7.04121e+06	4.38826e+06	5.37424e+06	5.35311e+06
PE 18:1_18:1	C41 H78 N O8 P	0.56	743.547	744.554	9.256	91.8	2	[M+H]+1	3.81584e+08	3.80288e+08	1.1608e+07	3.51567e+08	3.73013e+08	3.7001e+08	4.83456e+08	2.92402e+08	2.3606e+08	2.81217e+08	2.37559e+08	3.75008e+08	4.42601e+08	3.95681e+08	2.96817e+08	3.91012e+08	3.68263e+08	3.655e+08
PE 18:1_18:2	C41 H76 N O8 P	0.94	741.532	742.539	7.894	88	2	[M+H]+1	1.04607e+08	1.13082e+08	1.11209e+08	8.48905e+07	8.26106e+07	1.34445e+08	1.21183e+08	1.2269e+08	9.68173e+07	1.1399e+08	9.12869e+07	1.28918e+08	1.83611e+08	1.26697e+08	1.30481e+08	1.29662e+08	1.15115e+08	1.45964e+08
PE 18:1_19:1	C42 H80 N O8 P	1.21	757.563	756.556	12.325	77.8	2	[M-H]-1	2.76231e+06	3.12389e+06	3.11146e+06	3.23146e+06	3.26948e+06	3.1839e+06	3.71175e+06	3.59428e+06	2.03332e+06	4.01967e+06	3.69306e+06	4.00858e+06	4.77934e+06	2.44514e+06	3.71788e+06	3.49362e+06	2.49566e+06	3.16201e+06
PE 18:1_20:1	C43 H82 N O8 P	1.22	771.579	770.572	13.384	80.5	2	[M-H]-1	9.00835e+06	1.00598e+07	1.02101e+07	1.08199e+07	1.10073e+07	1.07336e+07	1.15753e+07	1.04412e+07	6.48273e+06	1.17948e+07	1.15257e+07	1.30961e+07	1.42783e+07	7.35872e+06	1.00111e+07	1.03749e+07	7.70712e+06	1.04758e+07
PE 18:1_20:3	C43 H78 N O8 P	1.67	767.548	766.541	10.53	71.7	2	[M-H]-1	1.88758e+06	2.22748e+06	2.26306e+06	2.34862e+06	2.22026e+06	2.3895e+06	2.0153e+06	2.65369e+06	1.47211e+06	3.31809e+06	2.62174e+06	2.6368e+06	3.60519e+06	2.11192e+06	3.3564e+06	3.51198e+06	2.48527e+06	3.18363e+06
PE 18:1_22:1	C45 H86 N O8 P	1.48	799.61	798.603	15.238	76.5	2	[M-H]-1	1.64475e+06	2.19319e+06	2.24057e+06	4.02155e+06	4.06675e+06	4.08906e+06	2.53307e+06	4.69368e+06	2.03177e+06	4.44974e+06	5.58343e+06	6.17172e+06	5.8901e+06	2.75204e+06	4.00508e+06	3.80167e+06	3.02572e+06	3.94801e+06
PE 18:1_24:1	C47 H90 N O8 P	1.49	827.642	826.634	17.02	75	2	[M-H]-1	970523	1.27942e+06	1.29927e+06	2.02932e+06	2.15421e+06	2.1839e+06	2.31947e+06	2.87225e+06	1.26056e+06	2.81941e+06	4.39123e+06	3.19055e+06	2.94819e+06	1.24641e+06	2.72259e+06	2.14064e+06	2.20228e+06	2.45425e+06
PE 18:2_18:2	C41 H74 N O8 P	0.39	739.515	740.523	7.419	84.6	2	[M+H]+1	9.56161e+07	1.36481e+08	1.45523e+08	1.37411e+08	1.34349e+08	1.51631e+08	1.53612e+08	7.97054e+07	9.49583e+07	7.4494e+07	9.86779e+07	1.54449e+08	1.29636e+08	1.1975e+08	1.27094e+08	1.33669e+08	1.24127e+08	1.17431e+08
PE 18:2_20:4	C43 H74 N O8 P	0.2	763.515	764.523	6.967	90.4	2	[M+H]+1	1.08492e+08	1.50406e+08	1.3821e+08	1.39615e+08	1.31561e+08	1.72276e+08	1.63818e+08	8.14537e+07	1.06131e+08	7.24341e+07	1.01282e+08	1.5486e+08	1.54491e+08	1.36898e+08	1.23535e+08	1.34068e+08	1.16775e+08	1.20294e+08
PE 18:3_18:3	C41 H70 N O8 P	1.07	735.485	736.492	5.532	89.7	2	[M+H]+1	1.06065e+06	1.17343e+06	1.33434e+06	1.02206e+06	985467	997171	1.10249e+06	563299	904762	575726	918649	1.76747e+06	1.81208e+06	1.16196e+06	1.24519e+06	1.36919e+06	813542	1.02131e+06
PE 19:1_17:2	C41 H76 N O8 P	0.91	741.532	742.539	8.688	72.7	2	[M+H]+1	9.18403e+06	1.0238e+07	8.76591e+06	1.04789e+07	1.09255e+07	8.57833e+06	1.14829e+07	6.58493e+06	6.33239e+06	7.35597e+06	6.35228e+06	1.13653e+07	1.13155e+07	8.80902e+06	8.34794e+06	9.63838e+06	9.34092e+06	1.01111e+07
PE 19:1_19:1	C43 H82 N O8 P	-0.69	771.577	772.584	11.151	94.9	2	[M+H]+1	4.02775e+07	4.01989e+07	260983	4.64414e+07	4.56945e+07	4.75135e+07	5.38156e+07	2.17375e+07	2.8706e+07	2.76349e+07	2.5236e+07	3.95631e+07	3.99893e+07	4.21744e+07	7.26231e+06	3.63799e+07	2.12535e+07	3.73885e+07
PE 19:2_19:2	C43 H78 N O8 P	-0.23	767.546	768.554	9.231	83.2	2	[M+H]+1	5.05466e+08	5.48769e+08	3.86469e+07	5.25636e+08	5.52212e+08	6.28038e+08	6.06746e+08	4.07565e+08	4.05289e+08	1.1607e+07	3.99064e+08	6.00708e+08	5.06942e+08	4.44048e+08	4.86853e+08	5.2536e+08	4.81665e+08	4.92338e+08
PE 20:0_18:1	C43 H84 N O8 P	-0.68	773.593	774.6	13.165	91.7	2	[M+H]+1	1.84661e+07	2.27278e+07	288174	4.72589e+07	3.53525e+07	2.65428e+07	2.77364e+07	1.14239e+07	1.59581e+07	1.41074e+07	1.1685e+07	2.42249e+07	2.20392e+07	1.94003e+07	1.05099e+07	1.55953e+07	2.39327e+07	1.83154e+07
PE 20:1_20:1	C45 H86 N O8 P	-0.67	799.609	800.616	13.241	93.2	2	[M+H]+1	6.87313e+06	1.11532e+07	293639	1.49279e+07	1.45754e+07	1.23547e+07	1.17692e+07	3.98965e+06	1.31964e+07	4.15532e+06	1.22911e+07	7.50654e+06	6.91153e+06	7.73739e+06	1.20385e+07	1.63196e+07	8.78941e+06	8.76843e+06
PE 20:1_20:2	C45 H84 N O8 P	-0.67	797.593	798.6	12.143	86.3	2	[M+H]+1	4.74065e+06	6.76777e+06	233521	1.03947e+07	1.07332e+07	9.41832e+06	7.96978e+06	3.67634e+06	4.71089e+06	3.00876e+06	4.49502e+06	7.11607e+06	5.25608e+06	6.06088e+06	5.74593e+06	6.01307e+06	5.80066e+06	5.84438e+06
PE 20:2_18:5	C43 H72 N O8 P	0.42	761.5	762.507	5.742	89.7	2	[M+H]+1	1.99175e+06	3.20052e+06	4.04038e+06	3.93756e+06	3.8605e+06	2.37144e+06	3.29775e+06	1.31433e+06	2.45496e+06	1.69172e+06	2.55979e+06	3.6012e+06	3.47747e+06	2.91086e+06	1.88544e+06	2.36405e+06	2.80553e+06	2.93358e+06
PE 20:2_20:2	C45 H82 N O8 P	0.54	795.578	796.586	10.591	88.9	2	[M+H]+1	2.91005e+07	4.73346e+07	255175	3.25358e+07	3.17497e+07	7.84313e+07	4.64136e+07	2.40226e+07	5.58489e+07	3.19589e+07	4.67253e+07	5.08799e+07	4.23332e+07	4.65517e+07	5.08005e+07	4.00726e+07	4.70489e+07	5.8375e+07
PE 20:2_20:3	C45 H80 N O8 P	0.61	793.563	794.57	9.283	85.5	2	[M+H]+1	6.69377e+07	8.95347e+07	3.02048e+07	7.95956e+07	8.51744e+07	1.32056e+08	1.00926e+08	4.43742e+07	4.83886e+07	3.35227e+07	5.64391e+07	9.45602e+07	7.97767e+07	6.68582e+07	7.54993e+07	7.48609e+07	5.92109e+07	6.4452e+07
PE 20:2_22:3	C47 H84 N O8 P	-0.58	821.593	822.6	10.87	80.2	2	[M+H]+1	1.50442e+06	6.11045e+06	219072	3.22254e+06	3.47189e+06	7.19909e+06	5.91283e+06	2.03578e+06	3.13869e+06	1.90081e+06	3.31947e+06	6.00978e+06	3.99447e+06	4.3397e+06	2.92993e+06	4.01562e+06	3.75906e+06	4.56623e+06
PE 20:3_20:3	C45 H78 N O8 P	-0.16	791.546	792.554	8.723	93.5	2	[M+H]+1	1.39754e+08	2.09696e+08	2.97299e+08	1.98757e+08	2.0121e+08	2.34147e+08	2.18328e+08	7.88086e+07	1.07995e+08	7.8921e+07	1.11441e+08	1.76102e+08	1.63529e+08	1.43065e+08	1.54812e+08	1.32706e+08	1.19198e+08	1.27666e+08
PE 21:1_21:1	C47 H90 N O8 P	-0.83	827.64	828.647	14.94	90.5	2	[M+H]+1	3.45894e+06	6.49845e+06	253631	1.46928e+07	1.45787e+07	8.39329e+06	6.9448e+06	1.45789e+06	5.7484e+06	2.70434e+06	5.66414e+06	5.40091e+06	4.42442e+06	7.32326e+06	3.92258e+06	4.40618e+06	6.29865e+06	7.25473e+06
PE 21:2_21:2	C47 H86 N O8 P	-0.09	823.609	824.616	13.468	74.2	2	[M+H]+1	3.02562e+06	446356	201667	6.46639e+06	6.68584e+06	2.83918e+06	3.47884e+06	2.15099e+06	2.37313e+06	2.33182e+06	2.34298e+06	3.86239e+06	2.75975e+06	3.06168e+06	1.91535e+06	2.99544e+06	3.29813e+06	3.47602e+06
PE 22:0_18:1	C45 H88 N O8 P	1.52	801.626	800.619	17.056	78	2	[M-H]-1	3.12626e+06	4.13179e+06	4.2753e+06	3.68528e+06	5.88577e+06	4.35911e+06	4.32662e+06	5.95682e+06	3.97548e+06	5.52702e+06	6.21151e+06	5.83741e+06	4.99278e+06	4.0386e+06	5.72059e+06	4.65119e+06	4.08379e+06	5.09065e+06
PE 22:2_22:2	C49 H90 N O8 P	-1.72	851.639	852.646	15.217	82.1	2	[M+H]+1	1.49482e+06	2.31225e+06	174401	6.06384e+06	6.25073e+06	2.66279e+06	2.46388e+06	933251	2.02409e+06	1.02777e+06	1.6965e+06	2.51031e+06	1.87821e+06	2.60826e+06	1.23764e+06	1.95921e+06	2.7894e+06	2.94684e+06
PE 23:0_17:1	C45 H88 N O8 P	-1.21	801.624	802.631	14.999	92.2	2	[M+H]+1	1.44978e+07	3.14999e+07	208357	5.68407e+07	5.61758e+07	2.36974e+07	2.90021e+07	1.21199e+07	1.2689e+07	1.25228e+07	1.74285e+07	2.42956e+07	2.00097e+07	2.79953e+07	1.59101e+07	2.27953e+07	2.86423e+07	2.86044e+07
PE 24:0_18:1	C47 H92 N O8 P	-2.02	829.654	830.662	16.338	93	2	[M+H]+1	3.08846e+07	4.60541e+07	174391	331631	1.99258e+07	4.10633e+07	2.86065e+07	1.41663e+07	3.14938e+07	1.50505e+07	2.57411e+07	4.28326e+07	2.90101e+07	4.02584e+07	3.88748e+07	3.3462e+07	3.79891e+07	3.80803e+07
PE 26:0_18:1	C49 H96 N O8 P	0.99	857.688	856.681	19.291	72.4	2	[M-H]-1	552731	576811	618034	663916	720847	720852	1.26894e+06	1.08411e+06	550277	1.19711e+06	1.0792e+06	951788	1.30219e+06	423831	1.00447e+06	925475	584300	815270
PE O-14:1_20:4	C39 H70 N O7 P	1.62	695.49	696.497	6.661	73.8	2	[M+H]+1	2.29284e+06	4.26985e+06	2.39293e+06	3.48324e+06	3.41887e+06	2.99887e+06	4.37091e+06	2.29042e+06	2.82674e+06	2.68007e+06	2.4562e+06	5.79486e+06	3.70478e+06	4.20286e+06	3.4644e+06	4.35756e+06	4.07619e+06	4.26443e+06
PE O-16:1_14:0	C35 H70 N O7 P	0.83	647.49	648.497	8.018	87.2	2	[M+H]+1	4.18844e+06	4.29554e+06	3.37279e+06	2.11038e+06	2.06144e+06	4.67986e+06	5.86159e+06	4.59538e+06	2.76298e+06	3.56396e+06	2.64679e+06	5.2367e+06	5.90997e+06	5.44141e+06	3.72564e+06	6.06697e+06	5.53928e+06	4.81705e+06
PE O-16:1_16:0	C37 H74 N O7 P	0.04	675.52	676.528	9.892	89.1	2	[M+H]+1	8.1722e+06	8.76917e+06	208629	8.63312e+06	8.08574e+06	9.15809e+06	1.07311e+07	7.73729e+06	5.65632e+06	7.86445e+06	5.82957e+06	1.12715e+07	1.10603e+07	1.07319e+07	2.68941e+06	1.25131e+07	1.01902e+07	1.06246e+07
PE O-16:1_16:1	C37 H72 N O7 P	0.14	673.505	674.512	8.269	86.4	2	[M+H]+1	5.27131e+07	5.17005e+07	4.9194e+07	4.72255e+07	4.60385e+07	3.50971e+07	5.54744e+07	5.15886e+07	3.2396e+07	4.64478e+07	2.99656e+07	4.96834e+07	6.04695e+07	6.41194e+07	3.42681e+07	6.23574e+07	6.31018e+07	4.86202e+07
PE O-16:1_17:1	C38 H74 N O7 P	1.46	687.521	686.514	11.334	71.6	2	[M-H]-1	4.53773e+06	5.33371e+06	5.55135e+06	5.29227e+06	5.26137e+06	5.36094e+06	4.47942e+06	5.71285e+06	4.3199e+06	5.57997e+06	3.42439e+06	5.56174e+06	5.93489e+06	5.11486e+06	5.75373e+06	5.98489e+06	3.3033e+06	5.63337e+06
PE O-16:1_18:1	C39 H76 N O7 P	0.26	701.536	702.543	10.139	89.9	2	[M+H]+1	1.01188e+09	8.95998e+08	298857	7.97876e+08	8.12405e+08	7.12572e+08	9.72941e+08	8.73716e+08	4.31348e+08	8.93234e+08	4.80781e+08	1.06487e+09	9.52829e+08	9.4538e+08	6.35717e+08	8.11029e+08	8.59707e+08	8.60798e+08
PE O-16:1_18:2	C39 H74 N O7 P	1.51	699.521	698.514	10.763	81.6	2	[M-H]-1	1.03797e+07	1.25894e+07	1.32421e+07	1.09203e+07	1.0732e+07	1.2982e+07	7.21718e+06	1.12257e+07	6.98729e+06	1.01993e+07	7.21051e+06	1.04256e+07	1.49086e+07	1.20984e+07	1.24692e+07	1.36273e+07	7.40055e+06	1.28496e+07
PE O-16:1_18:2	C39 H74 N O7 P	0.37	699.521	700.528	8.644	87.7	2	[M+H]+1	1.0577e+08	1.01534e+08	1.72456e+08	1.11353e+08	1.08951e+08	6.68121e+07	1.03606e+08	1.01427e+08	5.6697e+07	8.47909e+07	5.63907e+07	1.06392e+08	1.18304e+08	1.09481e+08	7.45339e+07	1.09311e+08	1.00687e+08	9.73718e+07
PE O-16:1_18:3	C39 H72 N O7 P	0.24	697.505	698.512	7.907	83.9	2	[M+H]+1	1.53058e+07	1.74786e+07	1.60274e+07	1.16197e+07	1.1321e+07	1.05394e+07	1.7141e+07	1.67427e+07	9.6859e+06	1.5325e+07	1.01856e+07	1.86365e+07	1.89072e+07	1.87685e+07	1.19446e+07	1.71657e+07	1.58751e+07	1.68253e+07
PE O-16:1_20:0	C41 H82 N O7 P	1.49	731.584	730.577	16.233	73.6	2	[M-H]-1	669665	905962	890241	1.00436e+06	990742	992348	744188	979263	501709	969693	965292	907685	756390	769852	867317	809231	546553	780904
PE O-16:1_20:3	C41 H76 N O7 P	0.17	725.536	726.543	9.719	85.4	2	[M+H]+1	1.96755e+08	2.12736e+08	1.4448e+08	1.99535e+08	2.06656e+08	1.4337e+08	2.3234e+08	2.00171e+08	1.20285e+08	1.87165e+08	1.22612e+08	2.31589e+08	2.33262e+08	2.20552e+08	1.48096e+08	2.34397e+08	2.24942e+08	2.28022e+08
PE O-16:1_20:4	C41 H74 N O7 P	1.15	723.521	724.528	8.338	86.2	2	[M+H]+1	1.02545e+09	1.12665e+09	1.15708e+09	9.6863e+08	9.64993e+08	1.05813e+09	1.14905e+09	9.10326e+08	7.9393e+08	8.58903e+08	8.5274e+08	1.20846e+09	1.03839e+09	9.51228e+08	9.48472e+08	1.16353e+09	9.50122e+08	9.76394e+08
PE O-16:1_20:5	C41 H72 N O7 P	0.67	721.505	722.512	7.19	85.3	2	[M+H]+1	2.73036e+08	3.40437e+08	3.94183e+08	3.30182e+08	3.35804e+08	2.5926e+08	3.28419e+08	2.68221e+08	1.4906e+08	2.49477e+08	2.16798e+08	4.06889e+08	3.2431e+08	2.75468e+08	2.84123e+08	3.60004e+08	2.85837e+08	2.99589e+08
PE O-16:1_22:2	C43 H82 N O7 P	-0.41	755.583	756.59	12.599	72.1	2	[M+H]+1	2.43704e+07	2.32326e+07	313726	2.64115e+07	2.56182e+07	2.40446e+07	3.48807e+07	1.85158e+07	1.45986e+07	1.85597e+07	1.44668e+07	1.9157e+07	2.60997e+07	2.97436e+07	1.59131e+07	2.57217e+07	2.42497e+07	2.69401e+07
PE O-16:1_22:3	C43 H80 N O7 P	-0.26	753.567	754.574	10.894	82.4	2	[M+H]+1	8.62779e+06	9.05647e+06	414182	1.10284e+07	1.10896e+07	1.32117e+07	1.15658e+07	7.17701e+06	7.41806e+06	8.29277e+06	7.48597e+06	8.77349e+06	8.08194e+06	7.2704e+06	9.40892e+06	8.43657e+06	8.70408e+06	8.3409e+06
PE O-16:1_22:4	C43 H78 N O7 P	0.21	751.552	752.559	9.677	86.6	2	[M+H]+1	1.6538e+08	2.04269e+08	290394	1.63795e+08	2.14377e+07	3.225e+08	2.65814e+08	1.89109e+08	2.54791e+08	2.55277e+08	2.60572e+08	1.95586e+08	1.69803e+08	2.63445e+08	2.44328e+08	2.36744e+08	1.93765e+08	2.90835e+08
PE O-16:1_22:5	C43 H76 N O7 P	1.33	749.537	750.544	8.405	85.6	2	[M+H]+1	6.5834e+08	6.28272e+08	7.25489e+08	5.81506e+08	5.88213e+08	7.69821e+08	7.16879e+08	4.97473e+08	4.50731e+08	4.53698e+08	4.61431e+08	5.76154e+08	5.84776e+08	5.69364e+08	6.02387e+08	5.96815e+08	5.45665e+08	5.29496e+08
PE O-16:1_22:6	C43 H74 N O7 P	0.14	747.52	748.528	7.839	77.6	2	[M+H]+1	1.33599e+09	1.59012e+09	1.6922e+09	1.26138e+09	1.2092e+09	6.03107e+08	1.69544e+09	1.09086e+09	1.08164e+09	1.0346e+09	1.01466e+09	1.48088e+09	1.57217e+09	1.33615e+09	1.39931e+09	1.41276e+09	1.29212e+09	1.273e+09
PE O-16:2_20:5	C41 H70 N O7 P	0.77	719.49	720.497	5.893	71.3	2	[M+H]+1	529199	272571	656299	388093	392161	1.56236e+06	434638	634689	132615	430361	192701	246083	268379	557742	1.67873e+06	419236	552193	738807
PE O-17:1_18:1	C40 H78 N O7 P	-1.09	715.551	716.558	10.828	80.6	2	[M+H]+1	1.93385e+07	2.45663e+07	356040	1.91056e+07	1.85494e+07	1.13655e+07	1.70171e+07	1.8891e+07	9.81518e+06	2.05585e+07	9.21844e+06	1.54461e+07	5.919e+06	1.73603e+07	1.13888e+07	1.59511e+07	1.69263e+07	1.43863e+07
PE O-17:1_20:3	C42 H78 N O7 P	0.3	739.552	740.559	10.21	75.9	2	[M+H]+1	1.59617e+07	1.55153e+07	367168	1.63036e+07	1.55935e+07	1.39168e+07	2.10612e+07	985558	9.58925e+06	1.17966e+07	9.34791e+06	1.71377e+07	1.34874e+07	1.30201e+07	9.90958e+06	1.44789e+07	1.30369e+07	1.41773e+07
PE O-17:1_20:4	C42 H76 N O7 P	0.95	737.537	738.544	9.278	84.9	2	[M+H]+1	7.66812e+07	8.66238e+07	4.82466e+07	6.85094e+07	7.15595e+07	9.19336e+07	8.37009e+07	6.76152e+07	6.56875e+07	6.78054e+07	6.57586e+07	9.37471e+07	7.75903e+07	6.93134e+07	7.16309e+07	8.09823e+07	8.15312e+07	7.53784e+07
PE O-17:1_20:5	C42 H74 N O7 P	1.52	735.521	736.529	8.052	71.3	2	[M+H]+1	2.10734e+07	2.49841e+07	2.12269e+07	1.28147e+07	1.27103e+07	2.34855e+07	2.09417e+07	2.31551e+07	1.76261e+07	1.9788e+07	1.51493e+07	3.39758e+07	2.38023e+07	1.72275e+07	2.11736e+07	9.92322e+06	2.23862e+07	2.08821e+07
PE O-18:0_18:1	C41 H82 N O7 P	1.12	731.584	730.576	14.687	77.8	2	[M-H]-1	1.79006e+06	1.8461e+06	2.25171e+06	2.22006e+06	2.38886e+06	1.96833e+06	524136	2.10312e+06	761622	2.87446e+06	1.6446e+06	2.99727e+06	3.98035e+06	1.82449e+06	2.69056e+06	2.46001e+06	1.60445e+06	3.60881e+06
PE O-18:0_20:4	C43 H80 N O7 P	1.09	753.568	752.561	12.792	75.5	2	[M-H]-1	3.04964e+06	3.54371e+06	3.43983e+06	2.71979e+06	2.76619e+06	2.79031e+06	1.61645e+06	2.35252e+06	1.95748e+06	2.37515e+06	2.47308e+06	2.71212e+06	4.81099e+06	3.74892e+06	4.98064e+06	3.60144e+06	3.51099e+06	5.99366e+06
PE O-18:0_22:1	C45 H90 N O7 P	1.24	787.646	786.639	17.928	81.1	2	[M-H]-1	1.63864e+06	1.92596e+06	1.99751e+06	2.34535e+06	2.41371e+06	2.49676e+06	2.7325e+06	2.60702e+06	2.00772e+06	3.6227e+06	2.17551e+06	2.91328e+06	3.32124e+06	1.45375e+06	2.11963e+06	2.43237e+06	1.13917e+06	2.22296e+06
PE O-18:0_22:3	C45 H86 N O7 P	1.1	783.615	782.608	15.764	70.6	2	[M-H]-1	267363	320410	301041	312988	352552	309324	117897	243920	82327.5	310708	391867	291843	426403	266469	382161	246553	315193	424588
PE O-18:0_22:4	C45 H84 N O7 P	1.26	781.6	780.592	14.354	80.7	2	[M-H]-1	687151	844317	881565	796953	734938	652442	511900	895073	443081	756374	1.66868e+06	967378	1.39193e+06	889810	1.67531e+06	850779	966577	1.13141e+06
PE O-18:1_18:1	C41 H80 N O7 P	0.47	729.568	730.575	12.239	87.8	2	[M+H]+1	2.7478e+08	2.86822e+08	295518	4.04877e+08	4.03106e+08	2.21672e+08	3.1702e+08	2.36102e+08	1.49129e+08	2.33584e+08	1.50226e+08	2.82228e+08	3.10212e+08	3.23688e+08	1.8466e+08	2.89918e+08	2.99256e+08	2.7827e+08
PE O-18:1_18:2	C41 H78 N O7 P	0.47	727.552	728.559	10.611	79.2	2	[M+H]+1	7.80083e+07	7.15178e+07	273741	4.44185e+07	4.43496e+07	4.18951e+07	5.62951e+07	7.15094e+07	3.52868e+07	6.96237e+07	4.29609e+07	7.51026e+07	6.46967e+07	7.19747e+07	4.55345e+07	7.85733e+07	8.18727e+07	6.29534e+07
PE O-18:1_20:1	C43 H84 N O7 P	-0.67	757.598	758.605	14.238	84.9	2	[M+H]+1	6.25125e+07	7.03508e+07	365501	1.01739e+08	1.14656e+08	6.69471e+07	8.64308e+07	4.5586e+07	4.35522e+07	4.19256e+07	4.27699e+07	2.89996e+07	7.75676e+07	8.3065e+07	4.43498e+07	6.42662e+07	6.64617e+07	6.91854e+07
PE O-18:1_20:2	C43 H82 N O7 P	-0.31	755.583	756.59	13.054	80.6	2	[M+H]+1	4.14391e+06	4.21599e+06	354909	9.28815e+06	5.98012e+06	2.12918e+06	7.28865e+06	4.42361e+06	2.9687e+06	3.85682e+06	2.67625e+06	4.5266e+06	6.29277e+06	5.62727e+06	2.46977e+06	6.431e+06	6.04415e+06	5.15788e+06
PE O-18:1_20:3	C43 H80 N O7 P	-0.19	753.567	754.574	11.153	86.2	2	[M+H]+1	1.1362e+08	1.14905e+08	559657	1.05107e+08	1.21068e+08	9.03968e+07	1.2394e+08	9.7462e+07	8.28082e+07	9.48661e+07	8.00114e+07	1.29586e+08	1.2118e+08	1.23563e+08	8.6934e+07	1.19296e+08	1.26306e+08	1.25876e+08
PE O-18:1_20:4	C43 H78 N O7 P	0.43	751.552	752.559	10.28	88.3	2	[M+H]+1	6.33189e+08	6.28122e+08	197656	5.83375e+08	5.6176e+08	6.75388e+08	6.70202e+08	5.18262e+08	5.19082e+08	5.58908e+08	5.06629e+08	6.96293e+08	5.7553e+08	6.42213e+08	5.57718e+08	7.05779e+08	6.41022e+08	2.21812e+08
PE O-18:1_20:5	C43 H76 N O7 P	1.59	749.537	750.544	8.981	86.5	2	[M+H]+1	1.40813e+08	1.77871e+08	4.29434e+07	1.91223e+08	1.87047e+08	1.35402e+08	1.85347e+08	1.4415e+08	9.57392e+07	1.07235e+08	1.01304e+08	2.37598e+08	1.85534e+08	8.30752e+07	5.93454e+07	1.76152e+08	1.54632e+08	1.76214e+08
PE O-18:1_22:1	C45 H88 N O7 P	-2.51	785.628	786.635	15.731	90.7	2	[M+H]+1	2.53853e+07	3.58521e+07	218760	6.82866e+06	7.61915e+06	4.20495e+07	3.01023e+07	3.20992e+07	2.50961e+07	3.02681e+07	2.74488e+07	3.74498e+07	3.32198e+07	3.50099e+07	1.76801e+07	3.05072e+07	3.88696e+07	4.23105e+07
PE O-18:1_22:2	C45 H86 N O7 P	-0.53	783.614	784.621	14.489	81.3	2	[M+H]+1	1.28309e+07	1.87756e+07	486255	3.24911e+07	3.62698e+07	2.03995e+07	2.89623e+07	1.50266e+07	7.83474e+06	1.70378e+07	8.95178e+06	1.53194e+07	2.09068e+07	2.50984e+07	1.12478e+07	2.01447e+07	2.30843e+07	2.34392e+07
PE O-18:1_22:3	C45 H84 N O7 P	-0.06	781.598	782.606	13.36	75	2	[M+H]+1	1.26486e+07	1.04291e+07	195004	2.34045e+07	1.95664e+07	1.38414e+07	8.79886e+06	8.08868e+06	7.47376e+06	8.49081e+06	7.11468e+06	1.19403e+07	9.84729e+06	9.96619e+06	5.18678e+06	9.99364e+06	9.76057e+06	1.02984e+07
PE O-18:1_22:4	C45 H82 N O7 P	-0.17	779.583	780.59	11.738	84.4	2	[M+H]+1	2.40736e+07	4.47505e+07	164910	7.19935e+07	6.41934e+07	5.79619e+07	4.17605e+07	1.47528e+07	1.07249e+07	663400	1.12633e+07	3.91234e+07	2.53452e+07	1.39855e+07	2.69333e+07	2.9025e+07	1.64086e+07	1.71938e+07
PE O-18:1_22:5	C45 H80 N O7 P	-2.88	777.565	778.572	10.338	78.6	2	[M+H]+1	2.41755e+08	2.59916e+08	288152	2.5631e+08	2.51568e+08	3.29276e+08	2.98899e+08	3.54455e+08	501345	525290	511222	2.55886e+08	2.86703e+08	612552	2.3679e+08	2.76706e+08	615262	562718
PE O-18:1_22:6	C45 H78 N O7 P	-0.32	775.551	776.559	9.711	86.7	2	[M+H]+1	3.22814e+08	4.1851e+08	1.11756e+06	3.58428e+08	3.75324e+08	3.57386e+08	4.2417e+08	2.29757e+08	2.15815e+08	2.20256e+08	2.13832e+08	3.64419e+08	3.74374e+08	3.89339e+07	2.67211e+08	3.27024e+08	3.04118e+08	3.15241e+08
PE O-18:1_24:4	C47 H86 N O7 P	-1.08	807.613	808.621	13.465	76.3	2	[M+H]+1	1.33534e+06	3.52078e+06	196565	9.11174e+06	1.01225e+07	2.83253e+06	2.83843e+06	340254	471534	315980	489720	3.71825e+06	2.10507e+06	770323	1.1591e+06	2.18237e+06	484564	1.06806e+06
PE O-18:1_24:5	C47 H84 N O7 P	-0.54	805.598	806.605	11.99	91.7	2	[M+H]+1	1.70419e+07	2.62139e+07	202955	2.32764e+07	2.68164e+07	1.99441e+07	2.28847e+07	1.06708e+07	8.55093e+06	1.10189e+07	8.87639e+06	2.51486e+07	2.09531e+07	1.98849e+07	1.33021e+07	1.98329e+07	1.49725e+07	1.57143e+07
PE O-18:1_24:6	C47 H82 N O7 P	2.2	803.585	804.592	10.973	78.1	2	[M+H]+1	2.58879e+06	4.94951e+06	230124	3.68268e+06	4.14039e+06	3.36079e+06	4.14664e+06	1.57856e+06	1.11401e+06	1.435e+06	554761	4.03172e+06	3.13916e+06	2.67691e+06	1.28538e+06	3.41116e+06	1.86222e+06	2.00785e+06
PE O-18:2_18:1	C41 H78 N O7 P	0.44	727.552	728.559	10.291	89.1	2	[M+H]+1	2.29724e+08	1.44241e+08	341499	1.5841e+08	1.53805e+08	1.07087e+08	1.95604e+08	1.8985e+08	8.93219e+07	1.85414e+08	9.13862e+07	1.42534e+08	1.75674e+08	1.7384e+08	1.07855e+08	1.83944e+08	1.6815e+08	1.71463e+08
PE O-18:2_18:2	C41 H76 N O7 P	-0.04	725.536	726.543	8.816	82.1	2	[M+H]+1	2.57613e+07	1.8602e+07	3.71246e+07	1.93916e+07	1.74148e+07	1.48848e+07	9.96794e+06	2.43814e+07	3.38508e+07	2.11019e+07	1.16486e+07	1.93343e+07	2.44843e+07	2.20191e+07	1.42855e+07	2.29602e+07	2.19772e+07	2.37428e+07
PE O-18:2_20:1	C43 H82 N O7 P	0.04	755.583	756.59	12.254	81.9	2	[M+H]+1	2.64999e+07	1.9656e+07	422684	2.75103e+07	2.8185e+07	1.95176e+07	2.71493e+07	2.03402e+07	1.23334e+07	1.88268e+07	1.25226e+07	1.72119e+07	2.17206e+07	2.01972e+07	1.42757e+07	2.17345e+07	2.08194e+07	2.09795e+07
PE O-18:2_20:3	C43 H78 N O7 P	1.05	751.552	752.56	9.29	73.6	2	[M+H]+1	3.75112e+07	3.21863e+07	668292	1.7094e+07	1.91467e+07	2.96613e+07	3.97415e+07	3.85141e+07	5.31556e+07	3.8688e+07	1.55595e+07	4.32401e+07	3.77561e+07	5.02585e+06	3.81903e+07	6.83418e+07	8.53912e+07	5.46415e+07
PE O-18:2_20:5	C43 H74 N O7 P	0.67	747.521	748.528	7.336	86.7	2	[M+H]+1	9.36028e+07	7.68099e+07	9.14704e+07	6.74879e+07	6.93643e+07	8.77628e+07	3.58277e+07	8.85208e+07	6.21796e+07	8.81867e+07	6.43845e+07	9.35027e+07	2.42929e+06	7.70887e+07	7.38083e+07	9.2955e+07	8.97185e+07	8.76755e+07
PE O-18:2_22:1	C45 H86 N O7 P	1.43	783.615	782.608	16.47	77.2	2	[M-H]-1	4.8064e+06	5.3947e+06	5.54761e+06	5.38985e+06	5.30714e+06	2.75175e+06	3.37198e+06	4.51459e+06	3.57467e+06	5.81045e+06	4.04965e+06	3.51141e+06	5.24819e+06	3.72355e+06	3.80769e+06	4.06686e+06	1.61269e+06	4.27938e+06
PE O-18:2_22:2	C45 H84 N O7 P	1.46	781.6	780.592	14.836	74.8	2	[M-H]-1	943987	1.48944e+06	1.41185e+06	2.40547e+06	2.29364e+06	2.44718e+06	2.23091e+06	1.54081e+06	974880	2.0997e+06	1.72938e+06	2.65101e+06	2.35759e+06	1.89185e+06	1.53756e+06	1.79223e+06	1.32168e+06	2.19673e+06
PE O-18:2_22:5	C45 H78 N O7 P	-0.85	775.551	776.558	8.564	90.2	2	[M+H]+1	9.88047e+07	7.78305e+07	1.25504e+08	7.4225e+07	7.13237e+07	1.28836e+08	9.79616e+07	6.23716e+07	4.93329e+07	5.17867e+07	5.46134e+07	6.1414e+07	2.79201e+07	5.07457e+07	6.62911e+07	2.61326e+07	5.87063e+07	4.92906e+07
PE O-18:2_22:6	C45 H76 N O7 P	0.05	773.536	774.543	7.974	86	2	[M+H]+1	5.46482e+08	4.802e+08	3.68129e+08	2.22877e+08	2.23414e+08	5.74079e+08	5.68565e+08	4.5074e+08	3.68064e+08	3.88369e+08	3.09727e+08	4.43728e+08	4.59061e+08	4.21208e+08	4.94527e+08	4.625e+08	3.9653e+08	3.90985e+08
PE O-18:2_24:5	C47 H82 N O7 P	1.37	803.584	802.577	12.285	80	2	[M-H]-1	1.36524e+06	1.46346e+06	1.44524e+06	1.49069e+06	1.43374e+06	1.49263e+06	1.3727e+06	1.80973e+06	722859	1.69865e+06	1.72834e+06	2.07794e+06	1.45265e+06	1.05095e+06	1.6335e+06	1.35585e+06	1.16347e+06	1.3777e+06
PE O-20:1_20:4	C45 H82 N O7 P	1.47	779.584	778.577	14.615	81.2	2	[M-H]-1	2.81372e+06	3.1364e+06	3.22461e+06	2.63288e+06	2.68463e+06	2.56743e+06	1.82316e+06	2.589e+06	1.46316e+06	3.02354e+06	2.57813e+06	2.68068e+06	2.71513e+06	2.37935e+06	3.24708e+06	2.45941e+06	2.05051e+06	2.61113e+06
PEtOH 16:0_18:1	C39 H75 O8 P	1.55	702.521	701.514	10.689	86.5	2	[M-H]-1	874590	1.03125e+06	1.09546e+06	1.06577e+06	1.05623e+06	974510	1.38156e+06	3.55008e+06	2.26347e+06	1.53806e+06	3.22288e+06	7.18294e+06	3.61002e+06	1.91157e+06	2.75367e+06	1.99962e+06	1.501e+06	2.54414e+06
PEtOH 18:1_18:1	C41 H77 O8 P	1.83	728.537	727.53	10.876	92	2	[M-H]-1	455228	514756	529500	578021	610469	579822	826591	1.7349e+06	1.0406e+06	818394	2.07987e+06	3.31443e+06	2.05214e+06	1.03219e+06	1.32622e+06	1.13503e+06	1.16698e+06	1.55904e+06
PG 16:1_18:1	C40 H75 O10 P	1.57	746.511	745.504	7.054	72.4	2	[M-H]-1	499429	536992	541351	604575	596385	602904	743117	555234	595300	567653	261617	852444	683329	376284	317951	376805	226601	382562
PG 18:1_18:2	C42 H77 O10 P	1.05	772.526	771.519	7.275	72.7	2	[M-H]-1	1.0922e+06	1.22169e+06	1.29702e+06	1.41133e+06	1.44502e+06	1.44526e+06	979618	940613	919265	1.06765e+06	668251	1.62666e+06	1.38753e+06	931545	598291	773032	570434	818695
PI 40:4	C49 H87 O13 P	-0.45	914.588	932.622	7.939	96.8	2	[M+NH4]+1	4.05315e+06	1.12905e+07	1.7122e+07	8.89594e+06	8.7936e+06	1.92955e+07	1.14268e+07	6.14729e+06	9.41407e+06	6.13385e+06	8.89845e+06	1.35803e+07	7.68836e+06	7.282e+06	1.19652e+07	1.19775e+07	1.23679e+07	1.15925e+07
PS 16:0_18:1	C40 H76 N O10 P	1.71	761.522	760.515	9.135	75.1	2	[M-H]-1	8.46718e+06	9.64925e+06	9.9381e+06	1.04718e+07	1.04569e+07	1.03318e+07	1.54737e+07	1.34026e+07	1.4144e+07	1.50249e+07	1.33814e+07	1.41891e+07	1.68213e+07	1.10018e+07	1.57779e+07	1.22999e+07	9.12609e+06	1.58698e+07
PS 16:1_22:2	C44 H80 N O10 P	1.13	813.553	814.56	7.979	95.6	2	[M+H]+1	4.50367e+07	2.19153e+07	2.63437e+07	1.88529e+07	1.8482e+07	3.74081e+07	2.98738e+07	2.90887e+07	3.45079e+07	3.42179e+07	2.88948e+07	1.27499e+07	3.32913e+07	3.25867e+07	4.03719e+06	1.16572e+07	9.13672e+06	4.20103e+07
PS 18:0_16:1	C40 H76 N O10 P	-0.31	761.52	762.528	7.101	92.2	2	[M+H]+1	4.91411e+07	6.33589e+07	6.53662e+07	5.75265e+07	6.02761e+07	7.83036e+07	7.93933e+07	4.81248e+07	4.52428e+07	4.49117e+07	4.87435e+07	7.58045e+07	6.35713e+07	5.74605e+07	5.50728e+07	7.74103e+07	7.56115e+07	7.1275e+07
PS 18:0_18:1	C42 H80 N O10 P	2.03	789.554	788.546	10.895	72.8	2	[M-H]-1	4.64923e+07	5.24703e+07	5.36711e+07	1.62498e+07	5.77585e+07	1.52533e+07	1.56228e+07	5.82178e+07	5.17041e+07	6.61113e+07	6.75336e+07	6.3632e+07	7.44251e+07	5.92743e+07	6.98034e+07	5.7002e+07	5.14067e+07	5.00355e+07
PS 19:2_19:2	C44 H78 N O10 P	1.14	811.537	812.545	7.264	80.3	2	[M+H]+1	1.53486e+07	8.31232e+06	1.24604e+07	1.25726e+07	1.21478e+07	2.17316e+07	2.0302e+07	2.23077e+07	1.77166e+07	2.28412e+07	1.82197e+07	2.96124e+07	1.88869e+07	1.77921e+07	2.27456e+07	3.2228e+07	2.98203e+07	3.12404e+07
PS 20:1_20:1	C46 H86 N O10 P	-1.66	843.598	844.605	10.971	94.4	2	[M+H]+1	9.51773e+06	4.61274e+06	302143	9.33562e+06	8.52846e+06	8.63751e+06	4.20143e+06	6.55478e+06	5.49578e+06	8.24489e+06	5.0578e+06	5.26838e+06	1.30658e+06	6.87325e+06	1.81697e+06	1.08232e+07	1.00101e+07	1.02392e+07
PS 20:3_20:3	C46 H78 N O10 P	-0.51	835.536	836.543	6.861	93.1	2	[M+H]+1	5.30809e+07	6.15444e+07	5.18473e+07	5.38514e+07	5.28667e+07	7.3789e+07	7.17515e+07	3.23907e+07	3.25231e+07	3.05862e+07	3.25065e+07	4.85598e+07	4.44219e+07	5.04971e+07	3.76287e+07	5.04622e+07	4.54108e+07	4.22941e+07
PS 22:0_16:1	C44 H84 N O10 P	-0.12	817.583	818.59	10.865	95.2	2	[M+H]+1	1.91283e+07	2.30193e+07	627052	9.7629e+06	1.2842e+07	2.53407e+07	2.33542e+07	1.99252e+07	1.66227e+07	2.07305e+07	1.37202e+07	2.68522e+07	2.27387e+07	2.49947e+07	1.59836e+07	2.38425e+07	2.83758e+07	2.8288e+07
PS 23:0_13:1	C42 H80 N O10 P	-0.68	789.551	790.559	8.776	93.9	2	[M+H]+1	2.55454e+08	2.73102e+08	3.90946e+08	2.66459e+08	2.67237e+08	3.62351e+08	3.07254e+08	2.512e+08	1.15141e+08	2.3972e+08	1.88034e+08	2.78357e+08	2.48671e+08	1.42888e+08	2.41083e+08	1.39361e+08	4.44533e+08	3.23754e+08
PS 24:0_18:1	C48 H92 N O10 P	1.09	873.647	872.64	17.142	71.6	2	[M-H]-1	4.85465e+06	5.92828e+06	6.09329e+06	6.95827e+06	7.09405e+06	6.95377e+06	2.72662e+06	2.91021e+06	5.51367e+06	7.63064e+06	9.98454e+06	6.63857e+06	1.05688e+07	6.79962e+06	6.9504e+06	7.28726e+06	5.54168e+06	7.19358e+06
PS 24:1_16:4	C46 H80 N O10 P	-0.5	837.552	838.559	7.329	88	2	[M+H]+1	2.08171e+07	2.18938e+07	1.95608e+07	1.6591e+07	1.61505e+07	3.66977e+07	2.96488e+07	1.24085e+07	1.37101e+07	1.17552e+07	1.36632e+07	1.76044e+07	1.87865e+07	1.74727e+07	1.70989e+07	2.00913e+07	1.79595e+07	1.80063e+07
SM 13:1;2O/19:0	C37 H75 N2 O6 P	0.08	674.536	675.544	5.251	90.1	2	[M+H]+1	7.15608e+07	7.84072e+07	7.12746e+07	6.15368e+07	6.52153e+07	1.04207e+08	9.11233e+07	6.29886e+07	3.073e+07	5.57022e+07	3.67051e+07	1.04543e+08	8.44106e+07	6.94299e+07	7.34196e+07	8.07581e+07	6.44965e+07	4.73856e+07
SM 13:1;2O/27:0	C45 H91 N2 O6 P	-0.21	786.661	787.669	12.373	92.4	2	[M+H]+1	4.68356e+08	5.4317e+08	359862	6.77172e+08	6.71976e+08	5.39714e+08	5.15809e+08	3.92469e+08	3.17459e+08	3.48504e+08	3.09839e+08	6.00485e+08	5.59623e+08	5.09911e+08	3.92897e+08	5.30659e+08	4.6792e+08	4.70487e+08
SM 13:1;2O/29:0	C47 H95 N2 O6 P	-0.28	814.693	815.7	14.448	92	2	[M+H]+1	5.08664e+08	6.18912e+08	285213	1.11532e+09	1.09631e+09	7.066e+08	6.01192e+08	4.51143e+08	5.25331e+08	5.22768e+08	5.38976e+08	7.24242e+08	6.72455e+08	7.40687e+08	5.14148e+08	6.63233e+08	7.79805e+08	7.50483e+08
SM 13:2;2O/29:0	C47 H93 N2 O6 P	-0.05	812.677	813.684	12.898	94.5	2	[M+H]+1	2.43774e+08	3.47331e+08	379865	4.78731e+08	4.71703e+08	2.94088e+08	3.49302e+08	2.00869e+08	1.86698e+08	1.96788e+08	1.72246e+08	3.23352e+08	2.98165e+08	2.9077e+08	2.18054e+08	2.86686e+08	2.75732e+08	2.68664e+08
SM 8:0;2O/24:0	C37 H77 N2 O6 P	0.3	676.552	677.559	5.7	87.7	2	[M+H]+1	3.39021e+06	3.39769e+06	3.83786e+06	4.04435e+06	3.87222e+06	5.1239e+06	4.26283e+06	4.77122e+06	7.71851e+06	4.58477e+06	7.08926e+06	9.46935e+06	8.15822e+06	6.67745e+06	9.3288e+06	1.00942e+07	9.24085e+06	9.78448e+06
SM 8:0;2O/25:0	C38 H79 N2 O6 P	0.52	690.568	691.575	6.382	83.9	2	[M+H]+1	722137	309684	1.33526e+06	751205	1.06693e+06	701891	643138	392788	1.32998e+06	869374	1.38436e+06	1.70293e+06	1.33561e+06	1.27412e+06	975840	2.06917e+06	1.64183e+06	1.70622e+06
SM 8:0;2O/26:0	C39 H81 N2 O6 P	0.33	704.583	705.591	7.131	88.5	2	[M+H]+1	1.07392e+08	1.4253e+08	1.50253e+08	1.26662e+08	1.30133e+08	2.05254e+08	1.69529e+08	1.83736e+08	7.09795e+07	1.51672e+08	2.52528e+08	3.93935e+08	3.02675e+08	2.73399e+08	3.72647e+08	4.36362e+08	3.37168e+08	3.50695e+08
SM 8:0;2O/27:0	C40 H83 N2 O6 P	1.85	718.6	719.607	7.987	79.5	2	[M+H]+1	4.20068e+06	412242	6.2253e+06	2.0971e+06	766951	9.22611e+06	439760	1.27084e+07	1.31994e+07	9.76968e+06	1.21949e+07	1.99662e+07	1.39555e+07	1.14624e+07	2.13045e+07	2.08711e+07	1.80185e+07	1.66368e+07
SM 8:0;2O/28:0	C41 H85 N2 O6 P	1.53	732.616	733.623	8.906	82.5	2	[M+H]+1	6.02361e+06	6.22806e+06	1.88153e+07	8.38958e+06	8.02033e+06	9.51331e+06	6.84709e+06	1.13698e+07	1.32634e+07	9.03726e+06	1.26754e+07	2.51827e+07	2.15389e+07	1.63394e+07	1.89337e+07	2.75777e+07	2.31154e+07	2.3177e+07
SM 8:0;2O/30:0	C43 H89 N2 O6 P	0.37	760.646	761.653	10.997	85.3	2	[M+H]+1	1.48817e+06	1.41133e+06	266681	2.67337e+06	2.5288e+06	2.01937e+06	1.96821e+06	3.44561e+06	5.86507e+06	3.90119e+06	5.22143e+06	9.40404e+06	7.38255e+06	5.74316e+06	6.76136e+06	1.19304e+07	1.00229e+07	1.06471e+07
SM 8:0;2O/32:0	C45 H93 N2 O6 P	-0.8	788.676	789.684	13.215	89.4	2	[M+H]+1	7.69963e+06	4.32597e+06	320768	1.42556e+07	1.36667e+07	1.40656e+07	8.14892e+06	1.81727e+07	2.69433e+07	1.81885e+07	2.5493e+07	4.36829e+07	2.72754e+07	2.72396e+07	2.9937e+07	5.1093e+07	5.15529e+07	5.09529e+07
SM 8:0;2O/34:0	C47 H97 N2 O6 P	-1.25	816.707	817.715	15.096	88.1	2	[M+H]+1	4.82904e+06	5.28434e+06	289907	9.89184e+06	1.05377e+07	9.14958e+06	5.3536e+06	1.10204e+07	2.52907e+07	1.5647e+07	2.46044e+07	2.81032e+07	1.71338e+07	2.11507e+07	2.02406e+07	3.1675e+07	4.4623e+07	4.54352e+07
SM 8:1;2O/25:0	C38 H77 N2 O6 P	0.22	688.552	689.559	5.884	87.2	2	[M+H]+1	7.14701e+07	7.49117e+07	5.59483e+07	6.27029e+07	6.35964e+07	8.74056e+07	8.24847e+07	6.25675e+07	5.1432e+07	5.6586e+07	5.38881e+07	8.14561e+07	8.52009e+07	6.86857e+07	7.20369e+07	7.63354e+07	7.02305e+07	7.28105e+07
SM 8:1;2O/26:1	C39 H77 N2 O6 P	0.29	700.552	701.559	5.433	88.2	2	[M+H]+1	1.97244e+08	2.21502e+08	1.58099e+08	1.6165e+08	1.7824e+08	2.5314e+08	2.5275e+08	1.7096e+08	1.31238e+08	1.41617e+08	1.32731e+08	1.98956e+08	2.26996e+08	1.78216e+08	1.97404e+08	1.9967e+08	1.66791e+08	1.66023e+08
SM 8:1;2O/27:0	C40 H81 N2 O6 P	0.39	716.583	717.591	7.366	88	2	[M+H]+1	6.79102e+07	7.22805e+07	9.18261e+07	6.5715e+07	6.2811e+07	7.1754e+07	7.81289e+07	5.38003e+07	3.60244e+07	4.26074e+07	3.64387e+07	7.98459e+07	7.10402e+07	5.54081e+07	5.71324e+07	6.78821e+07	5.29934e+07	5.07778e+07
SM 8:1;2O/28:0	C41 H83 N2 O6 P	0.88	730.6	731.607	7.999	88.6	2	[M+H]+1	3.45972e+08	3.34823e+08	3.80874e+08	2.97836e+08	2.98612e+08	3.13537e+08	3.43467e+08	2.92527e+08	1.85129e+08	2.38914e+08	1.89839e+08	3.75141e+08	3.71501e+08	3.00541e+08	2.64002e+08	3.41712e+08	2.84455e+08	2.75779e+08
SM 8:1;2O/28:1	C41 H81 N2 O6 P	1.12	728.584	729.591	6.829	88.3	2	[M+H]+1	1.37335e+08	1.49616e+08	1.20913e+08	7.42724e+07	8.51754e+07	1.47623e+08	1.7141e+08	1.1921e+08	7.61243e+07	8.40229e+07	7.52523e+07	1.43941e+08	1.52005e+08	1.08046e+08	1.27314e+08	1.45482e+08	1.06983e+08	1.05315e+08
SM 8:1;2O/30:0	C43 H87 N2 O6 P	0.25	758.63	759.638	10.205	86.5	2	[M+H]+1	1.69896e+08	1.60378e+08	344598	1.50863e+08	1.45475e+08	1.33481e+08	1.72574e+08	1.21332e+08	6.38818e+07	9.23462e+07	4.12392e+07	1.72897e+08	1.62656e+08	1.29322e+08	9.2221e+07	1.99832e+08	1.19389e+08	1.23032e+08
SM 8:1;2O/30:1	C43 H85 N2 O6 P	1.26	756.615	757.623	8.551	89.5	2	[M+H]+1	4.31673e+07	4.23643e+07	5.6525e+07	3.64047e+07	3.36763e+07	3.19083e+07	4.59272e+07	3.90683e+07	2.57308e+07	3.38529e+07	2.5717e+07	4.11644e+07	4.28924e+07	3.71949e+07	3.33187e+07	4.06408e+07	4.20536e+07	4.18228e+07
SM 8:1;2O/32:1	C45 H89 N2 O6 P	0.48	784.646	785.653	10.613	90.9	2	[M+H]+1	2.36829e+08	2.52403e+08	594012	1.96442e+08	1.92238e+08	2.18933e+08	2.87319e+08	1.75934e+08	1.19771e+08	1.47585e+08	1.20853e+08	2.39811e+08	2.31685e+08	2.09364e+08	1.60789e+08	2.3305e+08	1.94892e+08	1.92092e+08
SM 8:1;2O/33:0	C46 H93 N2 O6 P	-0.35	800.677	801.684	13.574	87.6	2	[M+H]+1	8.81488e+07	8.92901e+07	417217	1.3047e+08	1.37804e+08	9.8728e+07	9.28586e+07	7.93903e+07	6.11098e+07	7.95551e+07	6.09376e+07	9.9465e+07	8.6088e+07	9.20415e+07	6.97121e+07	9.42377e+07	9.72543e+07	9.4033e+07
SM 8:1;2O/34:0	C47 H95 N2 O6 P	-2.39	814.691	815.698	13.155	83	2	[M+H]+1	1.16805e+07	1.59662e+07	283367	1.07165e+07	9.7431e+06	2.45186e+07	1.36721e+07	2.14557e+07	3.76389e+07	2.21123e+07	3.91902e+07	5.70146e+07	4.23796e+07	3.1403e+07	3.94599e+07	6.41828e+07	6.36682e+07	6.32236e+07
SM 8:1;2O/34:1	C47 H93 N2 O6 P	-0.14	812.677	813.684	12.31	94.2	2	[M+H]+1	5.5084e+08	5.73814e+08	321804	7.55328e+08	7.35316e+08	6.86916e+08	6.72666e+08	4.35122e+08	4.03947e+08	3.86417e+08	3.93009e+08	6.56519e+08	5.93032e+08	5.32091e+08	5.05784e+08	6.48379e+08	5.57584e+08	5.59339e+08
SM 8:1;2O/34:2	C47 H91 N2 O6 P	-0.09	810.661	811.669	10.568	75.5	2	[M+H]+1	1.97595e+08	2.08238e+08	325952	1.36287e+08	1.36866e+08	2.30477e+08	2.72877e+08	1.46847e+08	1.14385e+08	1.2264e+08	1.14499e+08	1.86815e+08	1.75911e+08	1.62004e+08	1.51001e+08	1.9673e+08	1.71205e+08	1.66028e+08
SM 8:1;2O/35:0	C48 H97 N2 O6 P	-0.64	828.708	829.715	15.35	74.3	2	[M+H]+1	8.30902e+06	7.94476e+06	394104	3.59447e+07	3.5218e+07	1.11698e+07	9.41026e+06	7.60857e+06	1.02856e+07	1.0921e+07	1.07648e+07	1.02183e+07	1.1575e+07	1.30009e+07	7.60474e+06	9.71603e+06	1.32149e+07	1.35903e+07
SM 8:1;2O/36:0	C49 H99 N2 O6 P	-1.28	842.723	843.73	16.145	90.7	2	[M+H]+1	6.19143e+06	7.48876e+06	349492	1.63959e+07	1.53548e+07	8.20949e+06	6.82361e+06	5.09965e+06	9.27682e+06	7.77722e+06	7.66169e+06	8.67693e+06	8.44984e+06	1.1515e+07	7.19388e+06	8.79419e+06	1.19864e+07	1.19774e+07
SM 8:1;2O/36:1	C49 H97 N2 O6 P	-0.99	840.708	841.715	14.355	91.2	2	[M+H]+1	7.48493e+06	8.66356e+06	290173	1.25518e+07	1.406e+07	1.28163e+07	1.06313e+07	6.45071e+06	9.56567e+06	7.51623e+06	9.01272e+06	1.08563e+07	1.04544e+07	1.13233e+07	7.27505e+06	1.08903e+07	1.08776e+07	1.14938e+07
SM 9:1;2O/26:1	C40 H79 N2 O6 P	0.62	714.568	715.575	6.107	88.4	2	[M+H]+1	7.77041e+06	6.96075e+06	5.65151e+06	6.29815e+06	6.86712e+06	7.94188e+06	7.82534e+06	6.34576e+06	5.36753e+06	5.606e+06	5.61777e+06	7.32067e+06	7.3312e+06	6.22887e+06	5.37791e+06	6.58261e+06	6.60258e+06	6.4374e+06
SM 9:1;2O/32:1	C46 H91 N2 O6 P	-0.29	798.661	799.669	11.305	89.3	2	[M+H]+1	7.74743e+07	7.79614e+07	691021	9.22525e+07	9.23317e+07	8.04731e+07	9.19617e+07	6.31806e+07	4.60325e+07	5.20844e+07	4.53868e+07	7.88469e+07	7.28644e+07	6.60038e+07	5.63761e+07	7.31077e+07	6.69325e+07	6.85682e+07
SM 9:1;2O/34:1	C48 H95 N2 O6 P	-0.36	826.692	827.7	13.114	87.6	2	[M+H]+1	1.23594e+07	1.28547e+07	625228	2.00088e+07	2.06583e+07	1.66683e+07	1.70626e+07	1.21621e+07	1.01132e+07	1.19999e+07	1.06188e+07	1.59694e+07	1.47908e+07	1.48166e+07	1.05686e+07	1.5694e+07	1.52708e+07	1.53514e+07
TG 14:0_16:0_16:0	C49 H94 O6	-0.27	778.705	796.739	20.151	93.3	2	[M+NH4]+1	2.30368e+08	2.14268e+08	234075	2.45899e+08	1.49142e+06	3.17444e+08	2.12595e+08	2.28236e+08	2.33066e+08	2.40601e+08	2.29318e+08	2.25358e+08	2.17001e+08	2.34999e+08	2.92659e+08	2.20522e+08	2.2694e+08	2.40601e+08
TG 14:0_16:0_16:1	C49 H92 O6	-0.67	776.689	794.723	19.573	73.5	2	[M+NH4]+1	8.36884e+07	6.94422e+07	146872	2.79535e+06	407612	1.01175e+08	9.2329e+07	9.52022e+07	5.59368e+07	6.68447e+07	5.69068e+07	1.01138e+08	8.08591e+07	6.15923e+07	9.36412e+07	1.16641e+08	7.86939e+07	8.28729e+07
TG 14:0_16:0_18:1	C51 H96 O6	-0.01	804.721	822.755	20.18	85.1	2	[M+NH4]+1	3.40849e+08	3.41057e+08	159500	3.54348e+08	8.14739e+06	4.57308e+08	3.83664e+08	3.26468e+08	2.89898e+08	3.20847e+08	2.88844e+08	4.09219e+08	3.60881e+08	1.83782e+08	4.50754e+08	4.42669e+08	3.77112e+08	3.58173e+08
TG 14:0_16:1_18:1	C51 H94 O6	-0.11	802.705	820.739	19.664	83.3	2	[M+NH4]+1	9.14693e+07	6.80611e+07	261244	1.45579e+07	433220	1.1214e+08	9.26958e+07	1.05027e+08	6.76056e+07	7.73936e+07	4.19101e+07	1.08395e+08	8.04207e+07	6.57995e+07	1.1096e+08	1.24686e+08	8.56832e+07	7.96389e+07
TG 16:0_16:0_16:0	C51 H98 O6	0.18	806.736	824.77	20.717	95.3	2	[M+NH4]+1	2.53315e+09	2.50678e+09	260864	3.24002e+09	3.4003e+09	3.58351e+09	2.6342e+09	2.71674e+09	3.13495e+09	3.28787e+09	3.24545e+09	2.68157e+09	3.79887e+08	3.25699e+09	3.31441e+09	2.50568e+09	3.29283e+09	3.1509e+09
TG 16:0_16:0_18:0	C53 H102 O6	-1.03	834.767	852.801	21.228	94.7	2	[M+NH4]+1	5.74295e+08	4.09157e+08	215855	6.86355e+08	6.3663e+08	7.81561e+08	1.24015e+08	5.77629e+08	6.98797e+08	6.82743e+08	6.25924e+08	5.68692e+08	1.77858e+08	6.86981e+08	6.78819e+08	5.88776e+08	6.98985e+08	5.91148e+08
TG 16:0_16:0_18:1	C53 H100 O6	-0.49	832.752	850.785	20.746	93	2	[M+NH4]+1	2.67571e+09	2.68414e+09	239047	3.49084e+09	3.67214e+09	3.75217e+09	2.7826e+09	2.93559e+09	3.40777e+09	3.39166e+09	3.4191e+09	2.85698e+09	2.75016e+09	3.43964e+09	3.53173e+09	2.79632e+09	3.48446e+09	3.38862e+09
TG 16:0_16:0_22:5	C57 H100 O6	0.03	880.752	898.786	20.096	74.7	2	[M+NH4]+1	8.15796e+07	9.56209e+07	149919	3.51281e+07	273787	1.41863e+08	6.48801e+07	8.8014e+07	8.28359e+07	6.6136e+07	6.49228e+07	1.17151e+08	7.43193e+07	5.69072e+07	1.21363e+08	1.05548e+08	9.10356e+07	8.05781e+07
TG 16:0_16:1_18:1	C53 H98 O6	-0.39	830.736	848.77	20.258	81.3	2	[M+NH4]+1	6.2611e+08	5.74858e+08	265414	6.63851e+08	2.50281e+08	8.00974e+08	5.98741e+08	6.44343e+08	5.73121e+08	6.3775e+08	5.57784e+08	6.12682e+08	5.61393e+08	5.82553e+08	7.78451e+08	6.78227e+08	6.19316e+08	6.47993e+08
TG 16:0_17:1_18:1	C54 H100 O6	-0.28	844.752	862.786	20.466	80.7	2	[M+NH4]+1	8.02029e+07	7.4596e+07	177922	6.80391e+07	8.90194e+06	9.99685e+07	7.88452e+07	8.81911e+07	5.26325e+07	6.19712e+07	5.28536e+07	9.82133e+07	7.84291e+07	5.60353e+07	9.85024e+07	9.15432e+07	6.37827e+07	6.66677e+07
TG 16:0_18:0_18:0	C55 H106 O6	-0.76	862.798	880.832	21.696	71.4	2	[M+NH4]+1	8.74898e+07	9.40291e+07	194624	1.11561e+08	1.04518e+08	1.97221e+08	8.97472e+07	1.03709e+08	1.12942e+08	1.09517e+08	1.08792e+08	9.76342e+07	9.03384e+07	1.15105e+08	1.27311e+08	9.29137e+07	1.16896e+08	1.15654e+08
TG 16:0_18:0_18:1	C55 H104 O6	-0.36	860.783	878.817	21.252	91.4	2	[M+NH4]+1	6.90919e+08	6.74243e+08	173086	8.97313e+08	8.44355e+08	9.30417e+08	7.27571e+08	5.34102e+08	7.88034e+08	7.67148e+08	7.71141e+08	6.78746e+08	7.7527e+08	4.37993e+08	8.48201e+08	7.207e+08	7.85309e+08	7.70426e+08
TG 16:0_18:1_18:1	C55 H102 O6	-0.49	858.767	876.801	20.773	94.9	2	[M+NH4]+1	1.57186e+09	1.54091e+09	220113	1.92281e+09	1.92743e+09	2.14749e+09	1.61127e+09	1.68654e+09	1.74133e+09	1.34402e+09	1.8275e+09	1.65086e+09	1.55455e+09	1.80643e+09	1.98982e+09	1.61675e+09	1.76881e+09	1.81851e+09
TG 16:0_18:1_18:2	C55 H100 O6	-0.46	856.752	874.785	20.297	90.5	2	[M+NH4]+1	3.79745e+08	3.58425e+08	229372	4.23284e+08	1.35355e+06	5.04335e+08	3.72555e+08	4.00776e+08	3.71776e+08	3.94964e+08	3.82125e+08	3.96981e+08	3.45549e+08	3.74716e+08	4.95015e+08	4.0998e+08	4.05891e+08	4.06849e+08
TG 16:0_18:1_22:5	C59 H102 O6	-0.46	906.767	924.801	20.121	80.9	2	[M+NH4]+1	8.23182e+07	9.30397e+07	138046	4.0582e+07	252105	1.58374e+08	7.52084e+07	1.24535e+08	1.24711e+08	8.17888e+07	7.83722e+07	1.71775e+08	8.49786e+07	5.61063e+07	1.54568e+08	1.39067e+08	9.73985e+07	8.63188e+07
TG 16:0_18:1_22:6	C59 H100 O6	-0.14	904.752	922.786	19.911	79.4	2	[M+NH4]+1	5.85253e+07	6.26436e+07	134404	1.11833e+07	243483	7.59965e+07	5.26628e+07	8.8709e+07	4.89503e+07	5.7571e+07	5.17183e+07	1.35125e+08	5.22419e+07	3.44752e+07	9.8133e+07	1.04887e+08	6.93913e+07	6.56012e+07
TG 18:0_18:1_18:1	C57 H106 O6	-0.33	886.799	904.832	21.258	87	2	[M+NH4]+1	4.15972e+08	3.90751e+08	191369	4.26084e+08	3.94193e+08	5.29043e+08	4.4093e+08	3.94117e+08	3.70777e+08	3.62392e+08	2.40916e+08	3.79237e+08	4.50233e+08	3.90536e+08	4.82558e+08	3.62088e+08	3.6806e+08	3.6978e+08
TG 18:1_18:1_18:1	C57 H104 O6	-0.17	884.783	902.817	20.825	86.7	2	[M+NH4]+1	3.89822e+08	3.79377e+08	275994	4.11544e+08	4.03373e+08	5.24765e+08	3.71457e+08	2.81391e+08	3.70931e+08	3.9463e+08	3.86718e+08	3.85324e+08	3.54197e+08	3.79727e+08	4.68339e+08	3.95088e+08	4.03968e+08	3.93449e+08
TG 18:1_18:1_18:2	C57 H102 O6	-0.71	882.767	900.801	20.371	95.3	2	[M+NH4]+1	1.19523e+08	1.22947e+08	277528	3.56716e+07	1.9775e+07	1.93862e+08	1.16918e+08	1.3341e+08	1.42178e+08	4.73163e+07	1.16864e+08	1.51296e+08	1.12529e+08	1.02697e+08	4.46681e+07	1.1186e+08	1.20719e+08	1.23377e+08
TG O-16:0_16:0_18:1	C53 H102 O5	-0.51	818.772	836.806	21.528	82	2	[M+NH4]+1	3.41532e+07	3.18827e+07	124613	2.46096e+07	2.17342e+07	3.40934e+07	4.46426e+07	3.34556e+07	1.55426e+07	2.03045e+07	1.42949e+07	2.19572e+07	3.95801e+07	2.41613e+07	3.19073e+07	2.9793e+07	1.88571e+07	2.10364e+07
TG O-18:1_16:0_18:1	C55 H104 O5	-0.7	844.788	862.822	21.526	90.9	2	[M+NH4]+1	2.94795e+07	2.13307e+07	154859	1.61927e+07	1.59151e+07	2.29686e+07	2.94401e+07	3.85398e+07	1.01528e+07	1.61879e+07	8.95852e+06	1.38936e+07	2.36565e+07	1.39556e+07	2.13625e+07	2.20382e+07	1.17508e+07	1.30361e+07

## Sheet: Lipids (Log2 normalised)
Name		Cer 18:1;2O/16:0	Cer 18:1;2O/18:0	Cer 18:1;2O/22:0	Cer 18:1;2O/23:0	Cer 18:1;2O/24:0	Cer 18:2;2O/16:0	Cer 18:2;2O/22:0	Cer 18:2;2O/23:0	Cer 18:2;2O/24:0	Cer 18:2;2O/24:1	DG 16:0_18:1	DG 18:0_18:1	Hex2Cer 18:1;2O/22:0	Hex2Cer 18:1;2O/24:0	Hex2Cer 18:2;2O/24:0	Hex3Cer 18:1;2O/16:0	Hex3Cer 18:1;2O/18:0	Hex3Cer 18:1;2O/20:0	Hex3Cer 18:1;2O/22:0	Hex3Cer 18:1;2O/24:0	Hex3Cer 18:1;2O/24:1	Hex3Cer 18:2;2O/22:0	Hex3Cer 18:2;2O/24:0	Hex3Cer 18:2;2O/24:1	Hex3Cer 34:1;2O	Hex3Cer 40:1;2O	Hex3Cer 42:1;2O	HexCer 18:1;2O/24:0;O	LPC 16:0-SN1	LPC 18:0-SN1	LPE 16:0	LPE 16:1	LPE 17:1	LPE 18:0	LPE 18:1	LPE 18:2	LPE 20:1	LPE 20:2	LPE 20:3	LPE 20:3	LPE 20:3	LPE 20:4	LPE 20:5	LPE 22:1	LPE 22:2	LPE 22:3	LPE 22:4	LPE 22:4
Formula		C34 H67 N O3	C36 H71 N O3	C40 H79 N O3	C41 H81 N O3	C42 H83 N O3	C34 H65 N O3	C40 H77 N O3	C41 H79 N O3	C42 H81 N O3	C42 H79 N O3	C37 H70 O5	C39 H74 O5	C52 H99 N O13	C54 H103 N O13	C54 H101 N O13	C52 H97 N O18	C54 H101 N O18	C56 H105 N O18	C58 H109 N O18	C60 H113 N O18	C60 H111 N O18	C58 H107 N O18	C60 H111 N O18	C60 H109 N O18	C52 H97 N O18	C58 H109 N O18	C60 H113 N O18	C48 H93 N O9	C24 H50 N O7 P	C26 H54 N O7 P	C21 H44 N O7 P	C21 H42 N O7 P	C22 H44 N O7 P	C23 H48 N O7 P	C23 H46 N O7 P	C23 H44 N O7 P	C25 H50 N O7 P	C25 H48 N O7 P	C25 H46 N O7 P	C25 H46 N O7 P	C25 H46 N O7 P	C25 H44 N O7 P	C25 H42 N O7 P	C27 H54 N O7 P	C27 H52 N O7 P	C27 H50 N O7 P	C27 H48 N O7 P	C27 H48 N O7 P
Annot. DeltaMass [ppm]		0.4	0.37	-0.33	-0.55	-0.34	0.79	0.04	-0.07	0.83	0.21	-0.08	-0.13	-1.62	-0.8	-0.87	-0.38	-1.18	-1.83	-0.75	-0.94	-0.74	-0.34	-0.84	-0.29	0.68	0.51	0.69	-2.84	0.86	0.94	0.56	0.4	0.38	0.79	0.9	1.03	0.79	0.84	1.04	1.01	0.77	0.93	0.8	0.88	0.99	0.7	1.07	0.32
Calc. MW		537.512	565.544	621.606	635.621	649.637	535.497	619.59	633.606	647.622	645.606	594.522	622.554	945.71	973.742	971.726	1023.67	1051.7	1079.73	1107.76	1135.79	1133.78	1105.75	1133.78	1131.76	1023.67	1107.77	1135.8	827.683	495.333	523.364	453.286	451.27	465.286	481.317	479.302	477.286	507.333	505.317	503.302	503.302	503.302	501.286	499.27	535.364	533.349	531.333	529.317	529.317
m/z		538.52	566.551	622.613	636.629	650.644	536.504	620.598	634.613	648.629	646.613	612.556	640.587	946.717	974.749	972.734	1024.68	1052.71	1080.74	1108.77	1136.8	1134.79	1106.76	1134.79	1132.77	1068.67	1152.76	1180.79	828.69	496.34	524.372	454.293	450.263	464.278	480.31	480.309	478.293	506.326	504.31	502.294	502.294	504.309	502.293	500.278	534.357	532.341	530.326	528.31	530.324
RT [min]		9.205	11.28	15.314	16.101	16.682	7.654	13.946	14.86	15.853	13.927	13.417	15.215	12	14.055	12.478	5.946	7.468	9.258	11.253	13.385	11.203	9.641	11.699	9.601	7.939	13.442	15.556	14.495	2.189	2.66	2.212	2.669	2.903	4.399	2.215	1.968	4.335	3.837	3.333	3.045	2.071	1.935	1.871	5.257	4.594	4.103	3.406	2.168
mzVault Best Match		81.3	73.5	77.3	72.8	75.8	80.7	75.5	75.9	77.2	75	76.9	85	76	72.3	71.3	76.2	75.9	71.8	78.7	78.9	80	76.1	76.6	75.3	89.6	91.2	88.9	72.7	86.5	75.4	78.1	80.7	75.6	91.2	86.3	74.8	84.6	73.3	82.2	81.1	81.1	79.5	78	81.9	84.4	79.4	86.7	89.4
MS Depth		2	2	2	2	2	2	2	2	2	2	2	2	2	2	2	2	2	2	2	2	2	2	2	2	2	2	2	2	2	2	2	2	2	2	2	2	2	2	2	2	2	2	2	2	2	2	2	2
Reference Ion		[M+H]+1	[M+H]+1	[M+H]+1	[M+H]+1	[M+H]+1	[M+H]+1	[M+H]+1	[M+H]+1	[M+H]+1	[M+H]+1	[M+NH4]+1	[M+NH4]+1	[M+H]+1	[M+H]+1	[M+H]+1	[M+H]+1	[M+H]+1	[M+H]+1	[M+H]+1	[M+H]+1	[M+H]+1	[M+H]+1	[M+H]+1	[M+H]+1	[M+FA-H]-1	[M+FA-H]-1	[M+FA-H]-1	[M+H]+1	[M+H]+1	[M+H]+1	[M+H]+1	[M-H]-1	[M-H]-1	[M-H]-1	[M+H]+1	[M+H]+1	[M-H]-1	[M-H]-1	[M-H]-1	[M-H]-1	[M+H]+1	[M+H]+1	[M+H]+1	[M-H]-1	[M-H]-1	[M-H]-1	[M-H]-1	[M+H]+1
S1	Control	25.7608	21.8638	24.4414	22.5667	25.5566	22.9095	23.5388	21.7978	25.9918	23.8128	23.6412	23.4753	21.9491	22.4297	17.5924	23.455	21.1237	21.0449	23.5088	23.5086	22.9855	21.4853	22.1851	20.5758	22.2711	22.4016	22.2382	23.1419	26.4711	25.7933	23.4333	13.2995	15.7628	21.3572	23.9284	20.4415	19.4984	16.2367	15.6856	18.6432	20.0103	23.3479	21.1944	17.2543	16.8306	17.228	17.9964	20.5009
S2	Control	25.5481	21.363	24.0708	22.6036	25.7043	22.7034	22.7277	21.2579	25.6761	23.6451	23.4664	23.6866	22.3104	22.5484	19.3091	23.7609	21.2632	19.9466	23.9209	23.6978	23.4315	21.168	22.1651	20.1217	22.2374	22.3353	22.0456	21.7826	25.7824	25.7441	23.0648	18.2672	16.2028	21.6398	22.0115	21.4157	19.5049	17.2966	18.1449	19.1376	21.4412	22.2281	20.9818	17.508	16.756	17.5619	19.3837	20.6299
S3	Control	25.6789	21.9041	24.3795	22.6307	25.4466	22.51	23.3759	21.6728	26.1995	24.0042	24.2695	24.2995	22.1366	22.4135	19.0788	23.7981	21.5737	21.4455	23.928	23.9398	23.6095	22.0596	22.7833	21.2422	22.3729	22.7444	24.1778	22.4839	26.6894	25.5881	23.2844	17.8703	16.8429	20.8288	24.2626	20.4128	19.8682	16.2243	17.6968	18.7763	20.5384	23.4474	21.1669	14.7018	17.1547	17.333	19.5826	20.5287
S4	Control	25.7493	21.8145	24.3902	22.6846	25.6571	22.8009	23.3384	21.6781	26.0557	23.9122	23.9192	23.9483	22.2236	22.5492	18.917	23.7634	21.4168	21.0228	23.8828	23.8103	23.4493	21.7032	22.4916	20.8048	22.379	22.5892	23.251	22.6579	26.4472	25.7952	23.3527	17.6074	16.4225	21.3972	23.7641	20.9206	19.7185	16.763	17.5812	18.9519	20.8707	23.187	21.2014	17.0208	17.0354	17.4922	19.249	20.6653
S5	Control	25.7572	21.9003	24.3847	22.5811	25.523	22.707	23.2566	21.6007	25.8872	23.7604	24.0045	24.0021	22.1222	22.3853	18.8251	23.6063	21.2958	20.9349	23.7334	23.65	23.3144	21.5925	22.3168	20.6363	22.3318	22.4022	22.9834	22.2851	26.3794	25.7464	23.3658	17.4197	15.9595	21.197	23.8803	20.8138	19.5205	16.4637	17.8947	18.4608	20.9694	23.4306	21.5195	16.6046	16.7581	17.2135	18.9452	20.7052
S6	Treatment	26.0093	21.9859	25.0299	23.1564	25.8113	22.9811	23.3321	21.9246	26.1825	23.5214	24.038	24.3505	21.8711	22.3426	17.9169	23.4608	21.2473	20.9436	23.752	23.6225	23.2012	21.4408	22.3122	20.7403	21.8117	21.8491	21.5811	21.654	26.2938	25.7177	23.6233	18.2733	16.7037	21.6121	23.6108	20.9118	19.2675	16.7809	17.882	19.2526	20.7082	23.6997	21.6939	14.2051	16.3906	17.1479	18.7917	19.8528
S7	Treatment	25.7084	21.4062	24.2334	22.8433	26.041	22.4764	22.5992	20.7977	25.2021	23.2572	23.9071	23.8913	21.1024	21.9354	18.1792	23.1979	20.3091	19.5184	23.3349	23.2715	22.8491	20.0601	21.5122	19.7001	21.9154	21.6354	21.9245	19.4206	26.0671	24.3463	23.2419	18.1333	16.3012	21.0916	24.0396	19.4699	18.8781	14.8141	17.4656	19.0254	19.897	23.3868	21.2518	15.0061	15.1521	16.9858	19.3961	19.8533
S8	Treatment	25.8519	22.1195	24.6607	22.7412	25.6068	21.9697	23.0813	21.3979	25.9826	23.5432	24.0719	24.1327	21.8756	22.1621	19.7171	23.5484	21.2334	21.1528	23.5784	23.489	23.2069	21.4889	22.0386	20.6669	22.0101	21.7874	22.1702	23.034	26.4275	25.4498	23.1134	17.3554	12.5441	20.8861	24.7654	21.2071	19.1521	13.2645	18.5912	14.7506	21.7937	24.3829	22.378	15.467	15.6199	16.2523	18.2525	21.2791
S9	Treatment	26.0209	21.9377	24.8026	23.3435	26.6888	22.4392	23.4713	21.573	25.7502	23.264	24.4953	24.6501	21.6162	22.5556	18.1799	23.6098	21.2759	20.9544	23.8354	23.8293	23.4147	21.5072	22.4182	20.7474	21.4478	21.5786	21.9254	21.8355	25.9915	25.1856	23.0325	16.6719	12.5488	21.1276	24.7053	21.4234	17.3324	13.3352	18.4989	12.9609	21.5455	24.4548	22.4658	13.9491	13.2492	13.083	18.7074	20.6362
S10	Treatment	25.9149	21.9424	24.9683	23.1894	26.0648	22.307	23.1124	21.6857	25.822	23.2365	24.3344	24.6388	21.8509	22.6211	17.4459	23.6131	21.4333	21.0658	23.7598	23.8564	23.3803	21.5081	22.0751	20.5235	21.9926	21.8328	21.9185	21.329	26.145	25.0023	23.1089	17.8715	12.6089	21.5973	24.7939	21.2649	18.6273	15.2203	20.3764	13.0325	21.6638	24.3923	22.423	14.9649	13.3588	13.2434	18.1864	21.1006
Name		Cer 18:1;2O/16:0	Cer 18:1;2O/18:0	Cer 18:1;2O/22:0	Cer 18:1;2O/23:0	Cer 18:1;2O/24:0	Cer 18:2;2O/16:0	Cer 18:2;2O/22:0	Cer 18:2;2O/23:0	Cer 18:2;2O/24:0	Cer 18:2;2O/24:1	DG 16:0_18:1	DG 18:0_18:1	Hex2Cer 18:1;2O/22:0	Hex2Cer 18:1;2O/24:0	Hex2Cer 18:2;2O/24:0	Hex3Cer 18:1;2O/16:0	Hex3Cer 18:1;2O/18:0	Hex3Cer 18:1;2O/20:0	Hex3Cer 18:1;2O/22:0	Hex3Cer 18:1;2O/24:0	Hex3Cer 18:1;2O/24:1	Hex3Cer 18:2;2O/22:0	Hex3Cer 18:2;2O/24:0	Hex3Cer 18:2;2O/24:1	Hex3Cer 34:1;2O	Hex3Cer 40:1;2O	Hex3Cer 42:1;2O	HexCer 18:1;2O/24:0;O	LPC 16:0-SN1	LPC 18:0-SN1	LPE 16:0	LPE 16:1	LPE 17:1	LPE 18:0	LPE 18:1	LPE 18:2	LPE 20:1	LPE 20:2	LPE 20:3	LPE 20:3	LPE 20:3	LPE 20:4	LPE 20:5	LPE 22:1	LPE 22:2	LPE 22:3	LPE 22:4	LPE 22:4
Formula		C34 H67 N O3	C36 H71 N O3	C40 H79 N O3	C41 H81 N O3	C42 H83 N O3	C34 H65 N O3	C40 H77 N O3	C41 H79 N O3	C42 H81 N O3	C42 H79 N O3	C37 H70 O5	C39 H74 O5	C52 H99 N O13	C54 H103 N O13	C54 H101 N O13	C52 H97 N O18	C54 H101 N O18	C56 H105 N O18	C58 H109 N O18	C60 H113 N O18	C60 H111 N O18	C58 H107 N O18	C60 H111 N O18	C60 H109 N O18	C52 H97 N O18	C58 H109 N O18	C60 H113 N O18	C48 H93 N O9	C24 H50 N O7 P	C26 H54 N O7 P	C21 H44 N O7 P	C21 H42 N O7 P	C22 H44 N O7 P	C23 H48 N O7 P	C23 H46 N O7 P	C23 H44 N O7 P	C25 H50 N O7 P	C25 H48 N O7 P	C25 H46 N O7 P	C25 H46 N O7 P	C25 H46 N O7 P	C25 H44 N O7 P	C25 H42 N O7 P	C27 H54 N O7 P	C27 H52 N O7 P	C27 H50 N O7 P	C27 H48 N O7 P	C27 H48 N O7 P
Annot. DeltaMass [ppm]		0.4	0.37	-0.33	-0.55	-0.34	0.79	0.04	-0.07	0.83	0.21	-0.08	-0.13	-1.62	-0.8	-0.87	-0.38	-1.18	-1.83	-0.75	-0.94	-0.74	-0.34	-0.84	-0.29	0.68	0.51	0.69	-2.84	0.86	0.94	0.56	0.4	0.38	0.79	0.9	1.03	0.79	0.84	1.04	1.01	0.77	0.93	0.8	0.88	0.99	0.7	1.07	0.32
Calc. MW		537.512	565.544	621.606	635.621	649.637	535.497	619.59	633.606	647.622	645.606	594.522	622.554	945.71	973.742	971.726	1023.67	1051.7	1079.73	1107.76	1135.79	1133.78	1105.75	1133.78	1131.76	1023.67	1107.77	1135.8	827.683	495.333	523.364	453.286	451.27	465.286	481.317	479.302	477.286	507.333	505.317	503.302	503.302	503.302	501.286	499.27	535.364	533.349	531.333	529.317	529.317
m/z		538.52	566.551	622.613	636.629	650.644	536.504	620.598	634.613	648.629	646.613	612.556	640.587	946.717	974.749	972.734	1024.68	1052.71	1080.74	1108.77	1136.8	1134.79	1106.76	1134.79	1132.77	1068.67	1152.76	1180.79	828.69	496.34	524.372	454.293	450.263	464.278	480.31	480.309	478.293	506.326	504.31	502.294	502.294	504.309	502.293	500.278	534.357	532.341	530.326	528.31	530.324
RT [min]		9.205	11.28	15.314	16.101	16.682	7.654	13.946	14.86	15.853	13.927	13.417	15.215	12	14.055	12.478	5.946	7.468	9.258	11.253	13.385	11.203	9.641	11.699	9.601	7.939	13.442	15.556	14.495	2.189	2.66	2.212	2.669	2.903	4.399	2.215	1.968	4.335	3.837	3.333	3.045	2.071	1.935	1.871	5.257	4.594	4.103	3.406	2.168
mzVault Best Match		81.3	73.5	77.3	72.8	75.8	80.7	75.5	75.9	77.2	75	76.9	85	76	72.3	71.3	76.2	75.9	71.8	78.7	78.9	80	76.1	76.6	75.3	89.6	91.2	88.9	72.7	86.5	75.4	78.1	80.7	75.6	91.2	86.3	74.8	84.6	73.3	82.2	81.1	81.1	79.5	78	81.9	84.4	79.4	86.7	89.4
MS Depth		2	2	2	2	2	2	2	2	2	2	2	2	2	2	2	2	2	2	2	2	2	2	2	2	2	2	2	2	2	2	2	2	2	2	2	2	2	2	2	2	2	2	2	2	2	2	2	2
Reference Ion		[M+H]+1	[M+H]+1	[M+H]+1	[M+H]+1	[M+H]+1	[M+H]+1	[M+H]+1	[M+H]+1	[M+H]+1	[M+H]+1	[M+NH4]+1	[M+NH4]+1	[M+H]+1	[M+H]+1	[M+H]+1	[M+H]+1	[M+H]+1	[M+H]+1	[M+H]+1	[M+H]+1	[M+H]+1	[M+H]+1	[M+H]+1	[M+H]+1	[M+FA-H]-1	[M+FA-H]-1	[M+FA-H]-1	[M+H]+1	[M+H]+1	[M+H]+1	[M+H]+1	[M-H]-1	[M-H]-1	[M-H]-1	[M+H]+1	[M+H]+1	[M-H]-1	[M-H]-1	[M-H]-1	[M-H]-1	[M+H]+1	[M+H]+1	[M+H]+1	[M-H]-1	[M-H]-1	[M-H]-1	[M-H]-1	[M+H]+1
S1	Control	1.54087e+11	21.8638	24.4414	22.5667	25.5566	22.9095	23.5388	21.7978	25.9918	23.8128	23.6412	23.4753	21.9491	22.4297	17.5924	23.455	21.1237	21.0449	23.5088	23.5086	22.9855	21.4853	22.1851	20.5758	22.2711	22.4016	22.2382	23.1419	26.4711	25.7933	23.4333	13.2995	15.7628	21.3572	23.9284	20.4415	19.4984	16.2367	15.6856	18.6432	20.0103	23.3479	21.1944	17.2543	16.8306	17.228	17.9964	20.5009
S2	Control	25.5481	21.363	24.0708	22.6036	25.7043	22.7034	22.7277	21.2579	25.6761	23.6451	23.4664	23.6866	22.3104	22.5484	19.3091	23.7609	21.2632	19.9466	23.9209	23.6978	23.4315	21.168	22.1651	20.1217	22.2374	22.3353	22.0456	21.7826	25.7824	25.7441	23.0648	18.2672	16.2028	21.6398	22.0115	21.4157	19.5049	17.2966	18.1449	19.1376	21.4412	22.2281	20.9818	17.508	16.756	17.5619	19.3837	20.6299
S3	Control	25.6789	21.9041	24.3795	22.6307	25.4466	22.51	23.3759	21.6728	26.1995	24.0042	24.2695	24.2995	22.1366	22.4135	19.0788	23.7981	21.5737	21.4455	23.928	23.9398	23.6095	22.0596	22.7833	21.2422	22.3729	22.7444	24.1778	22.4839	26.6894	25.5881	23.2844	17.8703	16.8429	20.8288	24.2626	20.4128	19.8682	16.2243	17.6968	18.7763	20.5384	23.4474	21.1669	14.7018	17.1547	17.333	19.5826	20.5287
S4	Control	25.7493	21.8145	24.3902	22.6846	25.6571	22.8009	23.3384	21.6781	26.0557	23.9122	23.9192	23.9483	22.2236	22.5492	18.917	23.7634	21.4168	21.0228	23.8828	23.8103	23.4493	21.7032	22.4916	20.8048	22.379	22.5892	23.251	22.6579	26.4472	25.7952	23.3527	17.6074	16.4225	21.3972	23.7641	20.9206	19.7185	16.763	17.5812	18.9519	20.8707	23.187	21.2014	17.0208	17.0354	17.4922	19.249	20.6653
S5	Control	25.7572	21.9003	24.3847	22.5811	25.523	22.707	23.2566	21.6007	25.8872	23.7604	24.0045	24.0021	22.1222	22.3853	18.8251	23.6063	21.2958	20.9349	23.7334	23.65	23.3144	21.5925	22.3168	20.6363	22.3318	22.4022	22.9834	22.2851	26.3794	25.7464	23.3658	17.4197	15.9595	21.197	23.8803	20.8138	19.5205	16.4637	17.8947	18.4608	20.9694	23.4306	21.5195	16.6046	16.7581	17.2135	18.9452	20.7052
S6	Treatment	26.0093	21.9859	25.0299	23.1564	25.8113	22.9811	23.3321	21.9246	26.1825	23.5214	24.038	24.3505	21.8711	22.3426	17.9169	23.4608	21.2473	20.9436	23.752	23.6225	23.2012	21.4408	22.3122	20.7403	21.8117	21.8491	21.5811	21.654	26.2938	25.7177	23.6233	18.2733	16.7037	21.6121	23.6108	20.9118	19.2675	16.7809	17.882	19.2526	20.7082	23.6997	21.6939	14.2051	16.3906	17.1479	18.7917	19.8528
S7	Treatment	25.7084	21.4062	24.2334	22.8433	26.041	22.4764	22.5992	20.7977	25.2021	23.2572	23.9071	23.8913	21.1024	21.9354	18.1792	23.1979	20.3091	19.5184	23.3349	23.2715	22.8491	20.0601	21.5122	19.7001	21.9154	21.6354	21.9245	19.4206	26.0671	24.3463	23.2419	18.1333	16.3012	21.0916	24.0396	19.4699	18.8781	14.8141	17.4656	19.0254	19.897	23.3868	21.2518	15.0061	15.1521	16.9858	19.3961	19.8533
S8	Treatment	25.8519	22.1195	24.6607	22.7412	25.6068	21.9697	23.0813	21.3979	25.9826	23.5432	24.0719	24.1327	21.8756	22.1621	19.7171	23.5484	21.2334	21.1528	23.5784	23.489	23.2069	21.4889	22.0386	20.6669	22.0101	21.7874	22.1702	23.034	26.4275	25.4498	23.1134	17.3554	12.5441	20.8861	24.7654	21.2071	19.1521	13.2645	18.5912	14.7506	21.7937	24.3829	22.378	15.467	15.6199	16.2523	18.2525	21.2791
S9	Treatment	26.0209	21.9377	24.8026	23.3435	26.6888	22.4392	23.4713	21.573	25.7502	23.264	24.4953	24.6501	21.6162	22.5556	18.1799	23.6098	21.2759	20.9544	23.8354	23.8293	23.4147	21.5072	22.4182	20.7474	21.4478	21.5786	21.9254	21.8355	25.9915	25.1856	23.0325	16.6719	12.5488	21.1276	24.7053	21.4234	17.3324	13.3352	18.4989	12.9609	21.5455	24.4548	22.4658	13.9491	13.2492	13.083	18.7074	20.6362
S10	Treatment	25.9149	21.9424	24.9683	23.1894	26.0648	22.307	23.1124	21.6857	25.822	23.2365	24.3344	24.6388	21.8509	22.6211	17.4459	23.6131	21.4333	21.0658	23.7598	23.8564	23.3803	21.5081	22.0751	20.5235	21.9926	21.8328	21.9185	21.329	26.145	25.0023	23.1089	17.8715	12.6089	21.5973	24.7939	21.2649	18.6273	15.2203	20.3764	13.0325	21.6638	24.3923	22.423	14.9649	13.3588	13.2434	18.1864	21.1006
		37.165
[truncated: 248 more columns]

## Sheet: Lipids VIP score
	Comp. 1
VIP scores
PC O-40:8	1.602
PC O-40:6	1.5987
PE 20:3_20:3	1.5801
PC O-38:6	1.5569
Hex3Cer 40:1;2O	1.5563
PC O-40:5	1.5529
PC 20:2_20:2	1.5356
PC O-40:7	1.5219
SM 8:0;2O/30:0	1.52
PE 14:1_26:6	1.515
SM 8:0;2O/28:0	1.5105
PE 18:2_20:4	1.5058
PS 20:3_20:3	1.4988
SM 8:0;2O/24:0	1.4966
SM 8:0;2O/34:0	1.4954
PC O-40:4	1.492
SM 8:0;2O/26:0	1.4875
PE 10:0_32:7	1.4841
SM 8:1;2O/26:1	1.4819
PC O-38:5	1.4818
PE 20:2_22:3	1.4814
PC 20:3_20:3	1.4808
PG 16:1_18:1	1.4745
PE 20:2_20:3	1.4722
PE O-18:1_22:4	1.4704
PE 19:2_19:2	1.4687
PE 20:1_20:2	1.4661
PC O-38:3	1.4555
PE 18:0_17:1	1.4542
PE 18:2_18:2	1.4511
PE 16:0_16:1	1.4475
PC 20:1_20:1	1.4454
SM 8:0;2O/32:0	1.4448
SM 8:1;2O/34:2	1.4443
PC 18:2_18:2	1.4397
SM 8:1;2O/27:0	1.4395
PS 24:1_16:4	1.4376
PE 18:0_18:1	1.4372
Cer 18:2;2O/24:1	1.4343
PC 19:1_19:1	1.4305
SM 8:1;2O/34:0	1.4199
PE O-16:1_22:5	1.414
PG 18:1_18:2	1.3992
PC O-34:2	1.3977
Hex3Cer 34:1;2O	1.397
PE O-18:1_24:4	1.391
PE 16:0_18:1	1.3893
SM 8:0;2O/25:0	1.3875
SM 9:1;2O/32:1	1.384
PC 17:0_17:0	1.377
SM 9:1;2O/26:1	1.3647
LPE O-18:0	1.3521
SM 8:1;2O/28:1	1.3416
PE O-18:2_22:5	1.3381
PE O-17:1_20:4	1.3347
Cer 18:1;2O/23:0	1.3272
SM 8:1;2O/25:0	1.3247
LPE 24:6	1.3174
PE O-18:2_22:6	1.3144
PE O-18:1_24:6	1.3075
PC O-38:7	1.3064
PE O-16:1_22:3	1.3007
PC 17:1_17:1	1.2957
PE O-18:1_24:5	1.293
LPE 38:4	1.2921
PC 20:4_20:4	1.292
PC O-36:3	1.2914
PE 18:0_20:5	1.289
PC 19:2_19:2	1.2853
PC 15:0_15:0	1.2784
LPE 22:2	1.2697
PC 17:2_17:2	1.2658
SM 13:2;2O/29:0	1.2627
LPE 22:1	1.2525
LPE 20:5	1.2368
SM 8:1;2O/32:1	1.2365
PC 14:0_14:0	1.2336
TG O-16:0_16:0_18:1	1.2299
SM 13:1;2O/19:0	1.2246
PS 18:0_18:1	1.2244
PE O-18:0_22:4	1.2224
PE O-18:0_20:4	1.215
SM 8:0;2O/27:0	1.2133
PC O-38:2	1.2052
Hex2Cer 18:1;2O/22:0	1.2045
PC O-36:4	1.1936
LPE 20:4	1.1895
PC O-33:1	1.1894
PEtOH 18:1_18:1	1.1824
Cer 18:1;2O/16:0	1.1753
PE 20:0_18:1	1.1714
PC O-36:1	1.1649
TG O-18:1_16:0_18:1	1.1641
LPE 20:2	1.1594
LPE 36:4	1.1539
SM 8:1;2O/36:0	1.151
PC 18:1_18:1	1.1463
LPE 20:1	1.144
PE 16:1_22:2	1.1439
PE O-17:1_20:3	1.1352
Hex3Cer 42:1;2O	1.122
PE O-18:2_18:2	1.1217
SM 8:1;2O/34:1	1.1163
PC O-30:1	1.1123
Cer 18:1;2O/22:0	1.1121
SM 8:1;2O/28:0	1.1117
PC 21:1_21:1	1.1113
PC O-34:0	1.11
PC O-36:0	1.1056
PE 18:1_20:3	1.1053
PE O-16:1_20:4	1.1044
PE O-18:1_22:5	1.0999
PC O-33:0	1.0988
LPC 18:0-SN1	1.0956
PC O-35:1	1.095
Cer 18:1;2O/24:0	1.0857
LPE 36:5	1.0826
LPE O-16:1	1.0759
PC O-36:5	1.0739
PC 22:6_22:6	1.0588
LPE 22:3	1.0214
DG 18:0_18:1	1.0161
PS 19:2_19:2	1.0128
PC 16:1_16:1	1.0118
PEtOH 16:0_18:1	1.0011
PC O-34:1	0.99718
LPE 17:1	0.99137
LPE 20:3.1	0.99103
PC O-16:1	0.98086
PC O-32:0	0.96433
PE 18:0_20:3	0.96389
PC O-36:2	0.94218
PE 16:0_16:0	0.93089
PE 19:1_19:1	0.92881
TG 18:1_18:1_18:2	0.92365
Hex3Cer 18:1;2O/16:0	0.91728
PE O-17:1_20:5	0.90573
PE O-18:0_18:1	0.90336
PE 17:0_20:3	0.88072
PE O-18:0_22:1	0.88049
LPE 18:1	0.86835
DG 16:0_18:1	0.86712
LPE 20:3	0.86694
TG 18:0_18:1_18:1	0.86598
PS 24:0_18:1	0.86564
TG 16:0_16:0_18:0	0.86352
PC O-38:1	0.85391
PE O-16:1_20:0	0.8476
PE 21:1_21:1	0.84049
LPE 40:3	0.84045
LPE 22:5	0.83468
Cer 18:2;2O/16:0	0.83246
PI 40:4	0.8286
PE O-18:1_22:6	0.82695
Hex3Cer 18:2;2O/24:0	0.82348
HexCer 18:1;2O/24:0;O	0.8203
PE O-18:2_20:5	0.80404
PS 16:1_22:2	0.79647
PE 16:0_20:5	0.79354
PE 16:0_20:4	0.78315
PC 18:3_18:3	0.77587
PE O-18:1_20:5	0.77104
PE 19:1_17:2	0.76466
PC O-30:0	0.76459
PC O-29:0	0.76154
PE O-18:2_24:5	0.75835
PE O-18:0_22:3	0.75438
PE 20:2_18:5	0.74487
SM 8:1;2O/30:0	0.73717
PE O-18:2_22:2	0.73389
SM 8:1;2O/35:0	0.70203
PC O-26:0	0.694
PE 20:2_20:2	0.6814
TG 16:0_16:0_18:1	0.67817
Hex3Cer 18:2;2O/22:0	0.66651
PC O-35:2	0.66637
PC O-32:2	0.66284
PE O-18:1_18:2	0.66198
PC O-32:1.1	0.65573
PS 23:0_13:1	0.65225
Hex3Cer 18:1;2O/22:0	0.63846
LPE 34:1	0.62509
TG 16:0_17:1_18:1	0.61229
PC O-32:1	0.61173
PE 22:0_18:1	0.61028
PS 18:0_16:1	0.60865
PE 18:1_19:1	0.60829
PE 16:0_20:3	0.59617
Hex3Cer 18:1;2O/18:0	0.59429
Hex2Cer 18:1;2O/24:0	0.58877
PE 21:2_21:2	0.58176
PE 18:1_22:1	0.56504
LPE 22:4	0.56379
Hex3Cer 18:1;2O/24:1	0.55898
PE 18:0_20:2	0.54968
LPC 16:0-SN1	0.54282
PC O-38:0	0.54231
TG 16:0_16:0_16:0	0.52781
PE 16:1_18:1	0.52363
Hex2Cer 18:2;2O/24:0	0.52032
PE 16:0_17:1	0.51969
Cer 18:2;2O/24:0	0.51762
PE O-18:1_20:1	0.51518
PE O-16:1_16:1	0.4924
PC O-38:4	0.47387
LPE 40:1	0.4708
LPE 20:3.2	0.46078
Hex3Cer 18:1;2O/24:0	0.45836
LPE 16:1	0.45056
PE O-16:1_22:2	0.4333
PC O-29:1	0.43091
PE 20:1_20:1	0.42797
SM 13:1;2O/29:0	0.42764
PE O-18:1_22:1	0.42655
PE O-16:1_18:2.1	0.4258
Hex3Cer 18:2;2O/24:1	0.42091
TG 14:0_16:0_18:1	0.40262
PE 26:0_18:1	0.39505
PC O-18:1	0.39219
PE 22:2_22:2	0.38967
PE 18:0_22:4	0.36437
PE O-18:2_18:1	0.36281
Cer 18:2;2O/22:0	0.35991
LPE 16:0	0.35271
PE O-18:1_22:2	0.35132
PC O-39:8	0.34271
Cer 18:2;2O/23:0	0.33988
PE O-16:1_20:3	0.33556
TG 16:0_16:0_22:5	0.33248
PE O-18:1_20:3	0.33075
LPE 38:5	0.32941
PE O-18:1_20:2	0.32751
PE O-16:1_18:3	0.31801
PE O-16:1_20:5	0.30675
PE O-18:2_22:1	0.30607
PS 20:1_20:1	0.30208
PS 16:0_18:1	0.29169
PE O-16:1_16:0	0.28638
PE O-16:1_18:2	0.27816
LPE O-18:1	0.2714
PE 18:1_24:1	0.24244
PE 18:0_17:2	0.2275
Hex3Cer 18:1;2O/20:0	0.22282
TG 16:0_18:0_18:0	0.22276
PE O-16:2_20:5	0.1933
TG 16:0_18:1_22:5	0.1909
PE O-16:1_14:0	0.16995
LPE O-18:2	0.13417
TG 16:0_18:1_22:6	0.13267
PC O-31:0	0.13158
TG 14:0_16:0_16:1	0.12871
PC O-20:4	0.11869
LPE 22:4.1	0.11784
PC O-31:1	0.11148
LPE 40:5	0.081312
LPE 18:2	0.079234
LPE 38:6	0.073022
PE O-18:2_20:3	0.068975
PE 16:0_18:3	0.067724
LPE 18:0	0.062051
PE 18:0_20:4	0.059897
PE 18:3_18:3	0.053139
TG 14:0_16:1_18:1	0.034828
LPE O-17:1	0.011829
PE O-16:1_17:1	0.0053093
PC O-40:1	0.00089515
