# Supplementary material for: Novel Iron Chelator SK4 Drives Cytotoxicity through Inhibiting Mitochondrial Metabolism in Ovarian and Triple Negative Breast Cancer Cell Lines
Source: Biomedicines. 2023 Jul 24;11(7):2073. doi: 10.3390/biomedicines11072073 (PMC10377004; doi:10.3390/biomedicines11072073)
Supplement: Supplementary file 1 [file biomedicines-11-02073-s001.zip › Table S5.txt]

MDA_control_1	MDA_treat_1	MDA_control_2	MDA_treat_2	MDA_control_3	MDA_treat_3	MDA_control_4	MDA_treat_4	MDA_control_5	MDA_treat_5	PG.ProteinAccessions	PG.Genes
17.85523987	17.69012833	17.91972923	18.02098083	17.97976303	17.90661812	17.65056992	17.73006439	17.73654556	17.74729538	A0A024QZX5;A0A087X1N8;P35237	SERPINB6
17.67819786	17.61949158	17.46190834	17.58411026	17.51353264	17.47042847	17.51738739	17.51925659	17.50505447	17.55247688	A0A024R4E5;Q00341	HDLBP
18.79261589	18.64800644	18.60407257	18.75057793	18.70674324	18.6809845	18.65287018	18.55124283	18.64328003	18.6106472	A0A024RA52;P25787	PSMA2
12.20879745	12.08684731	12.65674114	12.15394974	11.87034607	12.12960148	11.71616459	11.81421661	11.88495445	12.09867764	A0A024RAC6;Q14241	ELOA
14.3756218	14.527071	14.19184303	13.72773933	14.34582996	14.09165573	13.58797073	13.62368774	14.78171635	14.23199749	A0A024RCQ8;A0A0G2JH76;A0A0G2JHB6;A0A0G2JIU6;A0A0G2JK02;A0A0G2JKR3;A0A0G2JLA3;A0A0G2JLL3;A0A140T8X7;A0A140T9Y1;G8JLL2;Q9UMR5	PPT2;PPT2;PPT2;PPT2;PPT2;PPT2;;;PPT2;PPT2;PPT2;PPT2
16.86631012	16.9607296	16.87637711	16.8268795	16.87823677	16.87347031	16.92211533	16.93549728	16.73009682	16.95074463	A0A024RCR6;A0A0G2JK23;A0A7I2V508;A0A7P0MQS5;P46379	BAG6
15.61653423	16.00059128	15.37834072	15.47069836	15.38559055	15.66365147	15.6809454	15.242239	12.87555981	15.25075245	A0A075B6G8;E2QRK7;Q5JTD0	TJAP1
12.84303379	14.42515755	13.87434578	14.11246967	13.96770287	13.32082176	12.2332468	13.96034718	14.58212757	13.88667774	A0A075B6Q2;Q5T0N5	FNBP1L
12.99697113	13.71955395	12.95691204	13.28618908	12.77993298	13.6484766	13.39709187	13.44244289	12.93621826	13.22742748	A0A075B754;Q96QE3	ATAD5
12.89013577	12.86863995	12.69500256	11.89035606	12.32400799	12.95172977	12.9966526	13.33489323	12.68414879	13.15794086	A0A075B784;Q9P275	USP36
13.85112667	14.05138588	13.7690382	13.56756973	13.65911198	13.56391048	13.75821686	13.84056282	13.78074646	13.61973667	A0A075B7B1;O15061	SYNM
13.69271278	13.17991161	13.4551363	12.40770817	13.34934521	13.26161003	13.04809284	13.15966702	13.26489353	13.34715652	A0A075B7B5;B7ZM87;O75044	SRGAP2
17.30227661	17.04243851	17.24004555	17.26076889	17.2685051	17.12610626	17.117939	17.2497139	16.96377373	17.14143944	A0A075B7C0;A0A0C4DGQ5;K7EIV0;P04632;U3KQE2	CAPNS1
16.78193092	16.86011696	17.03622246	17.00290489	17.07599258	16.80436707	16.89669228	17.03230476	17.26971626	17.17490578	A0A087WSW9;A0A087WSY9;A0A182DWI3;E9PIR7;F8W809;Q16881	TXNRD1
11.73376751	10.12278748	10.53219986	10.74181557	11.78691196	10.61923027	10.84550858	11.1352272	9.591679573	11.07923508	A0A087WT12;A0A087X2I2;P36969	GPX4
13.18820381	12.95594406	12.70248795	12.63237953	12.20924759	12.68936634	12.91679192	12.44425201	12.54302502	12.24620533	A0A087WT18;Q96A73	KIAA1191
13.71419048	13.44326401	13.87342644	13.48040771	13.70718288	13.53522491	13.50369549	13.2451725	14.14765358	13.37673569	A0A087WT20;Q9NV06	DCAF13
14.75273991	14.77268314	14.34870052	14.50735378	14.22726154	14.64616489	14.75930882	14.43241596	14.50109863	14.41003799	A0A087WT45;Q4V328	GRIPAP1
14.24187565	13.04426956	14.21432686	14.29258537	14.30713272	14.20531845	13.91216755	14.16682243	14.1247797	14.04658413	A0A087WT92;A0A087WV46;C9JXA7;Q0VGL1	LAMTOR4
16.09972763	15.88314819	16.05999756	16.05887604	16.02469254	15.85597038	15.95309067	15.84834671	15.89576817	15.93992043	A0A087WTA5;E7ERK9;Q9UI10	EIF2B4
11.78075695	11.72329521	9.25629425	10.13702393	11.82287788	10.52113628	11.31629276	10.98474503	10.82179832	11.26866055	A0A087WTA8;P08123	COL1A2
13.40321827	14.28855991	13.51176548	13.75211811	13.92217636	14.56989956	14.21801949	13.87426853	13.23099995	13.86104679	A0A087WTL4;A0A087WX97;Q9BXK5	BCL2L13
15.88345242	16.07257652	15.84259892	15.88574982	15.87086678	15.92934418	15.93593884	15.9668169	15.90093231	15.97778988	A0A087WTT2;Q5JWB9;Q96A57	TMEM230
15.55928135	15.31324291	15.76523209	15.61254406	15.77066231	15.43376541	15.47434521	15.88311195	15.882164	15.68383789	A0A087WTW0;A0A087WVR3;Q96T88	UHRF1
13.83911991	13.64766216	14.05567837	13.89954853	13.83891678	13.95362949	13.48980522	13.90111637	14.00357151	13.92148018	A0A087WU02;Q96RQ1	ERGIC2
14.84016132	14.9348011	14.60314178	14.82066536	13.95638466	14.78565311	14.79742718	14.4807272	14.12666798	14.27855396	A0A087WU07;Q5TGZ0	MICOS10
16.81947136	16.77682114	16.76810265	16.82193565	16.74448395	16.64441109	16.36931992	16.88316154	16.58843803	16.72932816	A0A087WU53;Q9H0U3	MAGT1
15.07943726	15.17035675	15.09608746	15.10929394	15.00158882	14.89018345	14.81910515	15.17206478	15.11477566	15.12638569	A0A087WUB9;Q8WYA6	CTNNBL1
17.723526	17.67296219	17.7117157	17.84337234	17.67464256	17.78206062	17.67916489	17.95256042	17.9464798	17.8943634	A0A087WUC6;E9PL01;Q15005	SPCS2
16.4982357	16.58847046	17.00697517	16.91697502	16.85625648	16.68723297	16.49697685	16.73913956	17.10396385	16.87605476	A0A087WUK2;O14979	HNRNPDL
14.86840248	14.80859947	13.89933968	14.38271523	14.24792194	13.66879082	14.47975445	14.34594345	13.99688721	14.07327938	A0A087WUT5;G5E977;Q6XQN6	NAPRT
16.28565788	16.22558403	16.14501762	16.18276024	16.18707275	16.14056015	16.32636642	16.28515053	16.32253075	16.0390892	A0A087WUT6;O60841	EIF5B
14.43752098	15.04541016	14.61059093	14.59603691	14.84674168	14.77376938	14.5928669	15.01550102	14.68200779	15.03156853	A0A087WUW6;A0A087X0G7;A0A087X1B1;Q9Y6K9	IKBKG
16.38010025	16.44075775	16.24547005	16.21858597	16.40276146	16.1568718	16.126894	16.30797195	16.25478935	16.61056328	A0A087WV05;Q99417	;MYCBP
15.64467144	15.77745724	15.26586342	15.32771492	15.34003448	15.54075718	15.70899963	15.46223354	15.58570862	15.87272072	A0A087WV25;O95684	CEP43
15.4207325	14.77655506	15.234519	15.0385437	15.24638748	15.33924389	15.96987057	14.89724255	15.45294285	14.67502403	A0A087WVD7;A0A087WY94;Q9Y3D8	AK6
13.14369488	12.96094894	13.06574821	12.70909882	12.75755787	12.85399151	13.01950264	12.90598869	12.86090279	12.70494747	A0A087WVI0;Q8WTW3	COG1
13.45508385	13.98010635	12.70310688	13.31651974	12.82934666	13.68949223	13.41009617	13.36392498	12.68879223	13.50132847	A0A087WVI1;Q96JY6	PDLIM2
16.99004173	16.98184967	16.89007187	16.77711105	16.89813423	17.01941299	16.97810364	17.02420235	16.85020256	16.84673691	A0A087WVM4;B7ZM99;Q6UB35	MTHFD1L
14.05615425	13.80521965	14.03704929	13.0874424	14.01962757	13.37297249	13.8149004	13.42685604	14.04205322	13.41893196	A0A087WVP1;Q14517	FAT1
14.01141453	13.88389206	13.94511795	13.63013458	13.85634422	13.55170059	14.10313988	13.61679745	13.79657745	13.72822285	A0A087WVQ2;I3L0Y2;I3L4Q4;Q9BUL5	PHF23
20.4013958	20.2740593	20.53244591	20.60012245	20.63290024	20.42754555	20.34373093	20.58282089	20.64791679	20.52690506	A0A087WVQ6;Q00610	CLTC
14.7286396	15.01098537	14.72854805	14.79768848	14.95316315	14.52099895	14.37765312	14.79757881	14.4962635	14.61283875	A0A087WVZ6;H7C4X9	ZMYND8
16.34785461	16.4072876	15.9839716	16.06337357	15.96372223	16.04791451	16.29269409	16.04290581	15.92562771	16.09787369	A0A087WW40;Q9Y371	SH3GLB1
14.06558228	13.7163229	14.15725231	13.31657982	12.84931278	13.60763264	13.88004208	13.28114033	12.58528423	14.21891212	A0A087WW43;E7ET33;Q06033	ITIH3
16.15260315	16.28474236	16.52305984	16.43880081	16.41877747	15.34304237	15.71737766	16.36546135	16.31103897	16.17446899	A0A087WW58;Q9C0D9	SELENOI
11.74938011	12.51622677	12.44704151	12.27504826	11.23988152	12.2370882	12.84460449	12.48608303	12.63460255	12.46879005	A0A087WW76;A0A452Q6Z5;A0A7P0TAS2;Q5T5U3	ARHGAP21
15.11629581	15.32236767	15.1529417	14.79119587	15.06505966	15.1076355	15.00365067	14.99808311	14.75432968	14.9188509	A0A087WW77;Q15334	LLGL1
13.65575886	13.75487423	13.68909073	12.33272076	13.39698124	13.60281563	13.70558071	13.59557819	13.60309505	13.57340336	A0A087WWA3;O60333;Q4R9M9	KIF1B
14.88471031	14.37061501	14.97934628	14.3175602	14.69115257	14.19345188	14.61638546	14.26513004	14.72130394	14.25196266	A0A087WWF6;F8W8R3;P49005	POLD2
13.7737608	13.72638798	14.01517963	13.66728878	14.29184818	13.76550865	13.75654316	13.79502583	14.34058475	14.07956886	A0A087WWM4;F8WAN9;H0YLV5;H0YMB3;H0YNJ6;Q9P2T1	GMPR2
14.74549675	14.9830904	14.86696339	14.7933054	14.80573273	15.02059269	14.66400909	14.87540627	14.96961498	14.73287487	A0A087WWP4;A0A494C001;A0A499FJY3;Q96T37	RBM15
14.22168541	12.95326996	11.41475105	11.70311356	13.3182497	12.08267784	11.11435413	12.29910851	13.21395969	10.77246666	A0A087WWP8;Q5VWQ0	RSBN1
10.9007616	10.75765991	11.16777325	8.298127174	10.66789055	11.95695305	9.834345818	11.69832516	10.9208746	11.85037804	A0A087WWR2;I3L2Z5;P56270	MAZ
15.82833672	15.70513439	15.58115673	15.27206707	15.56259155	15.73520088	15.6885891	15.53244686	15.45858479	15.42090893	A0A087WWS1;Q96FV9	THOC1
13.00827312	11.35993958	11.01422024	12.29516411	11.37874508	12.52790356	12.90904331	9.790595055	12.04417133	8.262579918	A0A087WWU1;F2Z329;Q96Q45	TMEM237
20.20305634	20.35490227	19.8979702	20.09702682	19.94151115	20.09872437	20.21866417	20.04314232	19.94525528	20.15746117	A0A087WWU8	TPM3
14.33836746	14.77712345	13.979352	14.15553188	14.00701332	14.69459343	14.1471529	14.17136288	13.56053829	14.02458858	A0A087WWW9;O95999	BCL10
17.61631775	17.5069294	17.38296318	17.41433716	17.40546608	17.28037643	17.21153641	17.33835602	17.26900101	17.22623062	A0A087WX29;Q13148	TARDBP
13.54336357	13.64743328	14.09725952	13.87266064	13.87321758	13.88242817	13.59697056	13.86532784	14.13276768	13.96488476	A0A087WXB0;O15126	SCAMP1
14.65507126	14.00668907	15.00153255	14.2303915	14.8203392	14.41369438	14.49530029	14.6128664	14.91186619	14.57510948	A0A087WXC5;A0A7I2V594;A0A7I2YQU0;E7ESZ7;O95299	NDUFA10
11.25013161	10.50507545	11.82085419	11.42107773	11.66482353	10.88649368	10.69946957	11.05773449	12.64731216	11.65745831	A0A087WXF8;A0A087WYV3;A0A0D9SEW3;Q9NP64	ZCCHC17
12.98324203	12.98446941	12.35522461	12.63568783	12.69004345	11.13846016	11.99078178	12.20792961	12.40725422	12.53500557	A0A087WXK8;Q9H4H8	FAM83D
18.7788105	18.71641922	18.76876831	18.69634438	18.76601219	18.26113129	18.44323921	18.58425522	18.71000862	18.66583824	A0A087WXM6;A0A0A6YYL6;J3KRX5;J3QQT2;P18621	RPL17;RPL17-C18orf32;RPL17;RPL17;RPL17
10.60379505	10.67247295	10.88355064	9.946385384	10.39758396	8.565734863	11.55709362	12.41843414	10.90641785	10.44856644	A0A087WXN9;Q765P7	MTSS2
13.66082954	13.15251541	13.390975	13.32032871	13.22796249	13.64834499	13.45147991	13.07676601	13.27157497	13.33066368	A0A087WXR7;A0A2R8Y6Q6;A0A2R8YCX2;A0A2R8YGP2;Q5TBB1	RNASEH2B
11.58091831	10.90215302	11.78635883	10.42092896	11.38330269	11.45401764	11.25745487	11.25478363	11.78107166	11.15013027	A0A087WXU0;A0A2R8Y4J4;Q9NWS8	RMND1
16.67305374	16.85240364	16.7169323	16.84576988	16.76409721	16.99230194	16.64523506	16.97432518	16.70958328	16.80113029	A0A087WXU3;A0A499FIX8;A0FGR8;H7BXI1	ESYT2
11.02371407	11.00746727	11.56016541	11.16500854	11.41261292	10.40580368	10.87338638	11.40198135	11.1528759	10.6515007	A0A087WXZ7;K7EIX2;Q6AI08	HEATR6
16.09808731	16.101017	16.01330185	16.17077255	16.13276291	16.23763084	16.24087143	16.19247437	16.04608727	16.25337029	A0A087WY55;Q9NP79	VTA1
14.24033451	14.09433842	13.68118	13.15637684	13.43739986	13.86545277	14.00732422	14.05018139	13.88310337	13.52732182	A0A087WYF7;Q6UXV4	APOOL
15.56426334	15.77059937	14.99162102	15.2533989	15.18151093	15.27069664	15.0926199	15.27793694	14.88359737	11.94766426	A0A087WYF8;A0A2U3TZH4;Q53GG5	PDLIM3
12.53324795	12.47019196	13.09433842	13.04504776	12.99481487	13.07319736	13.01321983	12.80398369	13.27660847	12.68430424	A0A087WYI0;C9IYS7;C9J979;Q5TA45	INTS11
15.45176888	14.69153214	15.55885506	14.54281616	15.37532902	14.87312889	15.41352367	14.37033176	15.23316479	14.41976833	A0A087WYJ2;M0R2B7;P28340	POLD1
14.13242817	14.05976677	13.22744656	12.95301342	13.26801491	11.45132065	12.65443039	13.35141373	12.41725349	12.95233727	A0A087WYL7;G3V4A5;O75586	MED6
14.76013851	14.45210934	14.72778225	14.61917591	14.55265045	14.57784176	14.56313324	14.46920395	14.5622673	14.53587627	A0A087WYN9;Q7Z478	DHX29
12.59107685	12.99640846	12.80751896	13.01270676	12.93031788	12.96343803	12.76347733	13.04842377	12.61137867	12.760993	A0A087WYP2;Q8IZQ5	SELENOH
14.4167614	14.46653175	14.0320673	14.44827557	14.04133987	14.02224636	14.47899914	14.08615303	13.47886848	14.30490875	A0A087WYR0;P09132	SRP19
16.94058037	17.04110336	16.91662979	17.11846352	16.94570732	17.1027298	17.03167343	17.00568199	16.87737274	17.07178497	A0A087WYS1;A0A7I2YQ74	UGP2
12.42233181	11.89406967	11.37956905	11.94893646	11.74157524	11.11881447	11.2392292	11.64445496	12.11653519	11.61259079	A0A087WYU2;Q96S19	METTL26
15.31605625	15.3204031	16.05975914	15.41000175	15.62000656	15.23829651	15.30433369	15.63271427	15.47912788	15.35203457	A0A087WYV9;A0A087X1F5;P57105	SYNJ2BP-COX16;SYNJ2BP-COX16;SYNJ2BP
16.5792675	16.57063293	16.40082932	16.39535904	16.37688065	16.47297287	16.42823029	16.44506645	16.52900887	16.40507126	A0A087WZ13;E9PAU2	RAVER1
13.85307693	14.06656361	14.17880154	13.90414143	14.07285881	13.98778439	13.76212215	13.89014721	13.66829014	13.86670971	A0A087WZ62;Q9H6U8	;ALG9
13.61044598	13.91882038	13.64148617	13.52496719	13.29744434	13.84436226	13.84055996	13.49437237	13.26470184	13.29328346	A0A087WZG4;A0A3B3IPE9;A0A590UK10;Q6ZSZ5	ARHGEF18
14.68842602	14.460145	14.56193829	13.88428688	14.34012127	12.45230579	13.97992516	14.30233383	13.83172703	13.99816513	A0A087WZK4;P78368;Q9Y6M4	CSNK1G2;CSNK1G2;CSNK1G3
14.25014114	14.31927395	14.02511024	13.79197025	13.80708599	13.92656517	14.07940769	14.05680656	14.11207867	14.17611504	A0A087WZL0;Q86UU1	PHLDB1
12.5411644	12.83848667	11.73400879	11.59664822	11.63999367	12.15479088	11.25706291	12.05343246	11.64653492	11.98246765	A0A087WZM2;D6REQ6;D6RHI9;O00584	RNASET2
15.80291462	15.73916626	15.85362053	15.78751469	15.8519001	15.76948452	15.6644001	15.81863499	15.63029099	15.75794888	A0A087WZN1;O43837	IDH3B
13.01568699	12.30052185	12.48396969	12.44382286	12.73657703	12.4567461	12.37351894	12.2561245	12.71290398	12.78533554	A0A087WZR3;A0A0D9SF50;H9KVA9;P46736	BRCC3
16.46616554	16.41130257	15.88280582	16.09451294	15.94818783	16.04673004	16.42243576	15.97920799	15.96208572	16.05127335	A0A087WZT3;Q9H3K6	BOLA2B;BOLA2
12.48800659	12.36453533	12.53302383	11.6939497	12.18506432	12.19488621	12.83144855	12.17622566	12.65582848	11.42236805	A0A087WZV0;H0Y9S9;O43314	PPIP5K2
14.80571556	15.02423	14.1707592	13.94472027	14.07925797	14.50597	14.43075943	14.66232395	14.00299358	14.45389748	A0A087WZX0;Q86UU0	BCL9L
16.29353905	16.16661263	15.91768456	15.68269062	15.88288593	15.76708126	16.13266945	15.94726467	15.86702347	15.77308369	A0A087WZX2;O95139	NDUFB6
10.82182026	12.21540737	12.64096546	11.66909981	11.46349525	9.511176109	11.76876354	12.67243385	12.71535206	10.64569664	A0A087WZY0;A0A1B0GTR6;A0A1B0GTV7;A0A1B0GUE8;A0A1B0GV94;A0A1B0GWI2;A0A1B0GWJ7;A0A1C7CYZ2;O75503	CLN5;CLN5;CLN5;CLN5;CLN5;CLN5;;CLN5;CLN5
11.70306873	13.34893799	12.28220272	12.22947407	12.21060371	13.03103828	12.89807987	11.98203182	12.73003674	12.25317287	A0A087X011;E9PES4;J3KPF9;Q9Y496	KIF3A
18.93419647	18.77968597	18.94913673	18.89704132	18.8549118	18.93143272	18.87368393	18.94322586	18.86948395	18.9459095	A0A087X054;A0A494C039;Q9Y4L1	HYOU1
12.6311264	12.26240444	12.53840542	11.47625637	12.31189632	12.68439388	10.07013321	12.35522175	11.89264488	11.64220428	A0A087X0E3;A0A0A0MS59;A0A0C4DFX4;Q6ZRS2	SRCAP;SRCAP;;SRCAP
13.26823425	13.21652603	13.12040997	12.95645714	12.53417683	12.19067287	12.89456081	12.17908478	11.7363224	12.89971828	A0A087X0H7;A0A669KB51;A0A6E1W401;Q8NEL9	DDHD1
14.26827526	13.89821148	13.73429298	13.08634758	13.55044651	13.5689764	13.37340641	13.68156433	13.62063122	13.42567253	A0A087X0H9;Q5T8P6	RBM26
13.80570889	13.84710693	14.41385078	13.91742706	14.22970009	13.96572685	13.82302856	14.10907555	14.41301823	13.96281052	A0A087X0K1;Q9Y376	CAB39
15.81670952	15.81893539	15.72578144	15.59159184	15.79149723	15.78170204	15.91347218	15.85538292	15.73350716	15.74868584	A0A087X0K9;Q07157	TJP1
15.54227734	15.27223206	15.41032982	14.95822239	15.34841728	15.25401402	15.31541824	14.97448158	15.32525539	15.16243935	A0A087X0L7;J3KNA0;Q15070	OXA1L
14.5951643	14.18325806	14.52142715	14.30572987	14.33830547	14.29274845	14.5988369	14.3825922	14.45475483	14.28852367	A0A087X0M4	SLC4A1AP
15.53206348	15.46712971	15.47070026	15.30481625	15.47092819	15.41187572	15.35543537	15.47708035	15.65290165	15.54442692	A0A087X0Q1;Q7Z739	YTHDF3
16.09324265	15.94718647	15.75776863	15.77452183	15.69487286	15.65914249	15.84145069	15.5518074	15.59762001	15.72468376	A0A087X0R6;Q9UMY4	SNX12
13.98031139	13.97332478	13.68919086	13.43940067	13.79348373	13.76357174	13.87586498	13.5188446	13.52449703	13.7207613	A0A087X0S5;P12109	COL6A1
15.55713463	15.61491489	15.530797	15.69270897	15.57889366	15.81650925	15.66199303	15.53801918	15.71656895	15.65650845	A0A087X0U2;A0A1B0GUZ5;P0DPB5;Q7Z776	POLR1D
15.6725111	15.62263012	15.39633465	15.17685795	15.33298492	15.21814442	15.3750267	15.20152092	15.24018097	15.2834034	A0A087X0W7;Q86TX2	ACOT2;ACOT1
15.77954483	15.74869919	15.62630749	15.60986137	15.60567379	15.83439922	15.84567261	15.54481602	15.64469624	15.65517998	A0A087X0W8;Q04206;Q2TAM5	RELA
15.06137943	15.0365057	14.55079556	14.64260387	14.63703632	14.4555645	14.51748943	14.64568901	14.63874817	14.60137844	A0A087X0W9;Q8N6M0	OTUD6B
19.73772812	19.78779793	19.35099983	19.30413818	19.29887199	19.44886017	19.54701042	19.50517273	19.28722	19.37146378	A0A087X0X3;P52272	HNRNPM
16.09005165	16.02589607	16.20362854	16.22205544	16.28383064	16.33869934	16.01098633	16.3173275	16.53342056	16.28408813	A0A087X117;A0A0G2JN29;Q15155	NOMO1
13.18450928	13.8951292	13.51299095	13.26385593	13.25423813	13.54699516	13.48159218	13.30049324	13.13496876	13.26103115	A0A087X142;A6NFQ9;A6NMH6;F8W8I8;Q92599	SEPTIN8
13.02259159	12.84800434	12.44442177	11.8653574	12.34400368	12.58983994	12.78674126	12.68352127	12.45485592	12.45574474	A0A087X1A8;A0A0A0MS38;A0A2R8Y3X7;D3VVH9;F5H211;G3V3R7;G3V4U9;P54252	ATXN3
14.80472183	14.11769295	14.88332939	14.25821114	14.71977711	14.47271633	15.11455917	13.90143108	14.42523956	14.14170647	A0A087X1G1;A0A7I2V2W4;A0A7I2V3L8;H7BYD0;Q16718	NDUFA5
13.41745472	13.78298092	13.49439907	13.49619865	13.30406284	12.60572243	13.58788872	13.41712761	13.33117962	13.9904356	A0A087X1H5;H7C3K3;Q15057	ACAP2
10.66624546	11.735322	12.49933434	11.97101212	12.12260818	12.41658497	12.72050667	12.17723274	11.78717995	12.48601627	A0A087X1P5;J3KQ34;J3QT73;Q9H9Q2	COPS7B
17.35412407	17.1651001	17.26419258	17.52017975	17.45146751	17.28710747	17.22012711	17.25137901	17.31687546	17.30170631	A0A087X1Z3;Q9UL46	PSME2
15.43923473	15.32152939	15.3434	15.24661446	15.45398808	15.51745129	15.41908932	15.37283611	15.38953018	15.52325916	A0A087X211;Q8TCG1	CIP2A
12.74123096	12.96641827	12.89988232	13.04951954	12.80829716	13.12744904	13.13305855	12.96822548	12.72956467	13.02407455	A0A087X246;A0A0B4J2C2;F8WF49;Q9Y2H0	DLGAP4
17.3748188	17.3175621	17.75491333	17.77066994	17.83056068	17.62929153	17.48735809	17.72397995	18.01438332	17.77760315	A0A087X253;P63010	AP2B1
13.5480566	13.60688019	14.05455685	13.62030983	14.30653667	13.05338955	13.85186005	13.00145435	13.77646732	13.91724396	A0A087X255;A0A6Q8PF94;C9J453;O15344	MID1
13.9766798	13.83957767	13.66857052	13.51762962	13.72289181	13.60035324	13.80516148	13.52890873	13.51872253	13.66599655	A0A087X256;Q2M389	WASHC4
14.80732727	14.61905575	14.54502106	13.35659599	14.22966862	9.651825905	14.27156353	13.8175211	14.79812717	13.8326664	A0A087X2B3;C9JH43;C9JYY6;F8W775;Q92823	NRCAM
16.06017685	16.00512886	16.02951241	15.95768738	16.1000843	16.18211174	15.87492847	16.00177956	16.02248764	15.95294189	A0A087X2D5;Q9BRJ2	MRPL45
14.56190491	14.6275816	14.65137291	14.41354084	14.56462765	14.53719711	14.73210716	14.59646702	14.48955345	14.69922924	A0A087X2D8	SPAG9
14.11944199	13.82810211	14.09293938	13.86161804	14.04672909	13.70654297	14.12639427	14.15567017	14.17632961	14.03555775	A0A087X2H1;Q9ULT8	HECTD1
17.83656693	17.78837585	17.81309319	17.81432533	17.79212952	17.76508713	17.82618332	17.73602486	17.73081398	17.78556252	A0A087X2I1;P62333	PSMC6
12.65538311	12.51928425	12.25664616	12.12938309	11.86245728	12.34465599	12.05252171	12.67322254	12.54155827	12.54069805	A0A088AWN2;Q8TBZ3	WDR20
15.71071434	15.63694859	15.28754616	15.27355576	15.40113926	15.3156147	15.50822163	15.32085705	14.89146328	15.07262802	A0A088AWN3;A0A0A0MSY4;Q9BZ29	DOCK9
13.03106117	13.51195717	13.16429043	13.25984764	13.35728645	13.31657505	13.63900852	13.75715065	13.26123905	12.77593517	A0A096LNV3;A0A096LP02;Q9Y508	RNF114
12.91917038	13.00159454	12.60342407	11.89936733	12.47672844	12.76169682	12.30493355	12.57060528	12.19735527	12.28594685	A0A096LNW1;P46100	ATRX
16.2894249	16.17478752	16.48174286	16.43755913	16.48399353	16.41252327	16.40407753	16.33897781	16.53486824	16.42094231	A0A096LNY6;A0A1B0GTJ7;A0A1B0GWJ0;A0A7P0T9A7;A0A7P0Z472;P30566	ADSL
13.64414883	13.36182308	13.03390408	12.03407669	12.51521015	12.60598755	13.07921791	13.31525421	13.18429565	13.16833878	A0A096LP22;Q86Y79	PTRH1
15.4365797	15.50911999	15.17491055	15.27304173	15.32352066	15.51399803	15.62176418	15.31702805	15.21932793	15.36977482	A0A096LP25	AAK1
13.62617588	13.65898037	13.34629917	12.31581211	13.38903236	13.13397408	13.35894394	13.41165638	13.32209682	12.95198441	A0A096LPC3;Q15545	TAF7
15.36348438	15.39726353	15.00952244	14.75488281	14.9063139	14.87751102	14.96667004	14.97583008	14.82353306	15.01366901	A0A096LPI6
13.10644913	13.02150917	13.2281208	13.20468807	13.24403763	13.06130123	13.1106863	12.91523838	13.5636797	13.1172533	A0A0A0MQR2;Q9BY42	RTF2
15.81343174	15.63683319	15.55571556	15.68245602	15.60347652	15.71019173	15.42992115	15.67400742	15.47878838	15.54981232	A0A0A0MQR7;P19388	POLR2E
13.91265965	13.95638752	13.90355015	13.49983597	13.80859566	14.18657112	14.10074139	14.01495457	14.11880398	14.17036057	A0A0A0MQS1;Q53H96	PYCR3
11.66559505	12.42772293	12.31362057	12.02541351	11.90607357	11.86029053	11.07837486	11.49185276	11.93559551	11.34834671	A0A0A0MQS2;F5H0Q6;K7EP11;Q8N2M8	CLASRP
16.31833839	16.24297905	16.28063011	16.26516342	16.44251251	16.34501648	16.18951416	16.21307564	16.39436722	16.23791504	A0A0A0MQU0;Q9BV38;U3KQC1	WDR18
14.67176533	14.49692345	14.75985336	14.60664082	14.83946991	14.31091213	14.45956135	14.55184269	14.88367844	15.03741741	A0A0A0MQU4;H7C277;H7C3V9;Q96I15	SCLY
17.89437485	17.71256447	17.68135071	17.22499084	17.77330208	17.9278698	17.95033455	17.54368782	17.76405907	17.32839394	A0A0A0MQW0;A0A0A0MR39	MYEF2
15.82892895	15.88022137	15.54649353	15.64829922	15.69859314	15.72346115	15.51334572	15.78228378	15.42663383	15.64110374	A0A0A0MQX8;C9JP00;Q9NR56	MBNL1
11.52496624	11.90800285	11.2309494	10.50941277	10.75196838	9.777080536	11.05117416	12.28042221	10.41671085	11.22141075	A0A0A0MR03;A0A0J9YWB6;A0A0J9YWJ4;K7EJD2;Q9Y5B0	CTDP1
13.50144768	13.07234764	13.20841503	12.76328087	12.84340954	13.20221233	13.54270267	13.10020638	13.07809258	12.80793571	A0A0A0MR08;A0A590UK03;O94966	USP19
13.7380619	13.71183872	13.17805195	13.12385273	13.17538834	13.28171825	13.08921909	13.66516113	13.47718143	13.29074001	A0A0A0MR09;P43378	PTPN9
14.97608948	15.0754118	14.78493118	15.14139652	15.06113052	15.14161873	14.85479546	14.90806293	15.38491154	15.04518795	A0A0A0MR33;A0A0C4DFM0;G3V5T0	GSTZ1
15.19460678	14.25752163	14.87621117	13.81341648	14.7663641	14.29878616	14.51925278	14.3769455	14.82786751	14.1556654	A0A0A0MR51;H7C2V0;O60427	FADS1
16.13500595	15.97585583	15.88039398	15.76061058	15.95373154	15.78820992	15.83485699	15.94343758	16.03878212	15.79263401	A0A0A0MRE5;Q9ULH1	ASAP1
10.74415779	11.26457214	11.79276562	11.49960899	9.956186295	12.96198654	12.53183842	11.32711029	11.46459675	11.0478344	A0A0A0MRE6;O94967	WDR47
13.8715868	14.07008934	13.52479076	13.28120804	13.56971264	12.42701912	13.54848194	13.33880138	13.38449192	13.5886116	A0A0A0MRI1;Q8IXQ4	GPALPP1
14.56488037	14.62218475	14.64907742	14.2074213	14.27170467	14.34542561	14.32265377	14.13815212	14.03139305	14.24359035	A0A0A0MRJ0;Q5VT25	CDC42BPA
17.82837868	17.88239479	17.73359108	17.8255043	17.80981636	17.43471909	17.52381516	17.60238075	17.72355461	17.75072098	A0A0A0MRJ6;F6S8N6;P22061	PCMT1
15.77136612	15.75547028	15.86093235	15.7809248	15.76590633	15.64690685	15.64881611	15.79930687	15.74566364	15.75277519	A0A0A0MRM8	MYO6
17.01475143	17.0082016	16.98459625	16.70370483	16.86348152	16.97349739	17.18323326	17.07614708	16.98278427	17.11263084	A0A0A0MRM9	NOLC1
17.98294258	17.83311081	18.18897057	18.04942322	18.17564774	18.01481056	17.81707191	18.10010338	18.21804428	17.98467255	A0A0A0MRP6;B7ZLQ5;P28370	SMARCA1
15.88562584	15.90479946	16.04029655	16.10719681	15.9682703	16.11917114	15.97732544	15.99385929	16.04185104	15.94150925	A0A0A0MRR7;P09234	SNRPC
16.17316818	16.24110985	15.74226761	15.99752617	15.92673206	16.10283661	16.20815849	16.07676506	15.821661	16.03778839	A0A0A0MRT6;B6VEX4;Q8IZP0	ABI1
13.40431595	13.54171085	13.27363777	13.18145657	13.50631523	13.56783485	13.65006447	13.50380898	13.42122555	13.45761204	A0A0A0MRU9;A0A7I2YQR3;E7ETY4;E9PC69;Q7KZI7	MARK2
13.51510906	13.66838741	13.79192448	13.1269865	13.40716934	13.32876682	13.53887844	13.45590496	13.73503017	13.53557587	A0A0A0MRX8;A0A1B0GU97;A0A1B0GW37;A0A1B0GWI9;A0A1B0GWJ4;A0A2R8Y7V8;O00712;Q5VW26;Q5VW27;Q5VW30;U3KQE8	NFIB
11.61409092	12.14483547	11.8875494	11.61373615	11.69872284	12.16054249	11.64357281	11.99589539	12.07505608	12.16259956	A0A0A0MRZ4;E7EMV7;E7EW15;Q15025	TNIP1
14.08663082	14.21439552	14.00877762	13.86639023	14.28915882	14.24376011	14.30918503	13.85908413	13.79837608	14.02776337	A0A0A0MS31;Q14790	CASP8
14.17353821	13.94795322	13.62117481	13.97476101	13.92703724	13.81264877	13.860116	13.94599342	13.87514877	13.79165173	A0A0A0MS45;A0A6I8PIQ6;J3KNI1;Q9H9E3	COG4
17.39220428	17.44267082	17.32998848	17.33490372	17.25676727	17.25811958	17.22688103	17.14245605	17.07608223	17.24847221	A0A0A0MS51;A0A0A0MT01;GELS_HUMAN;P06396	GSN;GSN;;GSN
12.8300333	12.74601936	12.39950562	12.2456007	12.56226158	12.24216461	12.25902939	12.66063118	11.92779636	12.26039696	A0A0A0MS90;Q9UIS9	MBD1
13.27086353	13.61294842	13.26491356	12.9412899	13.00809479	13.03225422	12.97254467	13.04234791	13.33283997	13.08683395	A0A0A0MSA7;A0A0U1RQK7;O43432	EIF4G3
16.30654526	16.15985489	15.89868164	15.89320755	16.03206825	16.13533974	16.09808922	16.25847626	16.19825172	16.108675	A0A0A0MSA9;A0A0C4DG49;P15151	PVR
15.24644279	15.23730469	15.25240231	15.09941196	15.22470856	15.17019176	15.28724384	15.23850441	15.12001705	15.30138111	A0A0A0MSB8;Q9UPT5	EXOC7
13.37952709	13.59746075	13.68021679	13.54384518	13.4467001	13.23658276	12.86506653	13.35490417	13.56293774	13.23335361	A0A0A0MSH6;B5MCU4;B5MDU6;C9JHU6;C9JUM0;Q9H6V9	LDAH
20.99720573	20.95205879	20.94688606	21.01952934	20.97904015	21.13293076	21.10068321	20.77650452	21.03781128	20.97911263	A0A0A0MSI0;PRDX1_HUMAN;Q06830	PRDX1;;PRDX1
15.90936279	16.0414772	15.736166	15.71504498	15.63598156	16.00778008	15.88870907	15.68475056	15.56391144	15.63660908	A0A0A0MSI2;B3KPJ4;Q8IXK0	PHC2
11.35197258	11.7373457	11.44657135	11.31778717	11.44489002	11.75618935	11.02523613	11.72806168	10.71645737	11.61923313	A0A0A0MSJ1;F5GWN9;F5H101;F8WE42;Q76FK4	NOL8
17.15835953	17.20134354	17.37427521	17.46104431	17.33868408	17.50804329	17.40844345	17.28555107	17.3976326	17.35580444	A0A0A0MSJ6;D6RA44;Q07002	CDK18
18.810215	18.93359184	18.5570507	18.6165638	18.60717201	18.83031082	18.78033066	18.83917809	18.6347084	18.75434494	A0A0A0MSK5;Q5JTV8	TOR1AIP1
12.94705486	12.68089771	12.29906178	12.04435539	12.62615108	12.5390377	12.57037735	12.20026302	12.37982845	12.26337147	A0A0A0MSK6;Q13017	ARHGAP5
15.86186218	15.90916252	15.50388718	15.39597225	15.90633011	15.63883686	15.63717365	15.2925005	15.35138512	15.24054432	A0A0A0MSS8;P42330	AKR1C3
12.58773804	12.56764221	12.32657814	12.66426086	12.39476681	11.30313969	11.55535412	12.09204292	12.66725159	12.45235634	A0A0A0MST8;C9JRP1;E9PFN4;Q9Y6M7	SLC4A7
17.17452812	17.20037079	16.79640198	16.81211472	16.84590721	16.73389626	16.82843208	16.95071602	16.42951584	16.80272293	A0A0A0MSV9;A0A0G2JH37;A0A0G2JKZ1;A2AB90;O15533	TAPBP
16.18439674	16.24930573	16.43606186	16.5191021	16.42186356	16.27770996	16.30587387	16.38506889	16.53380013	16.52991676	A0A0A0MSW4;P48739	PITPNB
13.11324501	13.00963688	13.05508995	13.21200562	13.07951546	12.10789299	12.97557354	13.06716156	12.44747353	12.37982082	A0A0A0MSY7;A0A7P0MLU2;H3BP77;O00142	TK2
14.60775852	14.79407978	14.16234589	13.94725323	14.14312649	14.20969486	14.14531612	14.40768433	13.88823795	14.22723007	A0A0A0MSZ4;A0A0A0MT64;A0A0A0MTN9;A0A0C4DFN8;A0A0C4DGN7;J3QQX3;P22570	FDXR
14.48052597	14.52193928	14.35412121	14.38302708	14.44744492	13.06457996	13.13929844	14.2388382	14.00337887	14.16050339	A0A0A0MT00;E9PI99;Q13952;Q5T6K5;Q5T6K7	NFYC
14.82356071	14.46686268	15.22268486	14.87623692	15.29851437	14.8372364	14.50660515	15.04215908	15.388134	15.01432323	A0A0A0MT32;P38571	LIPA
14.62146378	14.29386139	15.32399654	15.10833454	14.2356739	14.25753117	13.56105995	14.42525101	14.47227383	14.57112026	A0A0A0MT33;Q9UPN6	SCAF8
12.84058952	12.9430151	12.70123386	12.66844177	12.4124403	12.46092701	12.43102932	12.33099079	12.76883602	12.36372185	A0A0A0MT47;Q99549	MPHOSPH8
15.0457592	14.77298832	14.85766506	14.74142361	14.83675385	14.90621662	14.75431156	14.85214043	14.93089485	14.76623058	A0A0A0MT83;P26440	IVD
15.16602421	15.13953304	15.3423872	15.14045429	15.24947262	15.17792606	15.17238617	15.1862154	15.48524189	15.23946571	A0A0A0MTB8;Q8NI36	WDR36
14.33954811	14.20338058	14.37338161	13.99672985	14.36734581	14.1084671	14.13164234	14.16815376	14.22574711	14.09965134	A0A0A0MTC1;A0A0A0MTR7;Q63HN8	RNF213
12.09747124	12.71109962	12.26938629	12.47366714	12.50945854	12.75999928	12.19442844	12.78169441	12.36819077	12.44521999	A0A0A0MTC2;D6RA37;D6RDV0;D6RIY7;Q13454	TUSC3
12.16773224	12.4536953	12.39842129	12.01602936	12.00218105	12.7022438	12.25075817	12.25814342	10.97878551	12.01981735	A0A0A0MTG1;A0A0G2JIA5;A0A0G2JL52;A0A140T8Y0;A0A140TA35;A0A140TA36;A0A140TA40;A0A140TA45;B4E0K6;B7ZL25;Q5ST30	VARS2
16.68269539	16.51426506	16.66361237	16.61072731	16.68206215	16.46157455	16.82863235	16.45616913	16.57819939	16.50667763	A0A0A0MTH3;Q13418	ILK
13.82861042	14.05920982	14.02968597	13.91174889	13.84900093	13.77599049	13.93141747	14.06889725	13.95984936	14.11039543	A0A0A0MTH9;O14981	BTAF1
13.08062649	13.28921986	13.94970989	14.16801071	13.85906887	13.92381954	13.6702652	14.40170193	14.28819847	14.40510559	A0A0A0MTI1;Q15392	DHCR24
18.532938	18.53993034	18.87325287	18.8999691	18.74965477	18.90423203	18.5710125	18.8758812	18.84654045	18.82787514	A0A0A0MTJ9;Q6PIU2	NCEH1
12.67106533	12.80434227	13.06770706	12.7405014	13.16587162	12.45665264	12.50525475	13.27429676	13.32799149	13.17612171	A0A0A0MTL6;H3BQI5;H3BSV5;Q6ZS17	RIPOR1
14.90365124	14.85621643	14.95751381	15.1085453	15.02066898	14.86462593	14.57456398	14.98136902	15.37198162	15.06796837	A0A0A0MTN0;Q13617	CUL2
14.85061264	13.68534088	14.41213322	14.38114166	14.70949459	14.17461491	14.22355652	14.31502342	14.92262936	14.53910542	A0A0A0MTN3;P21266	GSTM3
14.24938679	14.28470993	14.72317982	14.5320015	14.97033215	14.45057487	14.42761421	14.73113441	15.01785946	15.20035744	A0A0A0MTQ5;G3V556;P56378	ATP5MJ
16.11872673	16.07239914	16.43994331	16.36598778	16.31725883	16.34309006	16.02903938	16.31978035	16.45692253	16.21694374	A0A0A6YYA0;Q9Y3B3	TMED7-TICAM2;TMED7
14.41243076	14.51858616	13.13250732	12.85575104	13.38276291	13.53990269	13.54047871	13.72081757	12.78566837	13.4048872	A0A0A6YYA4;Q96M83	CCDC7
15.99906731	16.29698181	15.71663952	16.13409042	15.77753162	15.88146591	15.91862965	16.19958878	15.85295486	16.16490555	A0A0A6YYC0;E9PJN1;O75676	RPS6KA4
14.57871723	14.74813938	14.42432404	14.49282265	14.42707729	14.55953598	14.58088493	14.42122555	14.67920589	14.45892906	A0A0A6YYC7;Q96JP5	ZFP91-CNTF;ZFP91
13.56228542	14.11701393	13.66017914	12.72778988	13.82823467	12.86241913	12.48009396	13.46053696	13.42353439	13.37745571	A0A0A6YYH1;Q7Z6K5	C15orf38-AP3S2;ARPIN
16.64103317	16.72911263	16.64196587	16.55641365	16.76827049	16.48688889	16.60095215	16.58178902	16.97100067	16.39435196	A0A0A6YYI3;A0A0B4J1V8;Q9NQ55	PPAN-P2RY11;PPAN-P2RY11;PPAN
16.98004341	16.98430443	16.91498756	16.88665581	16.94318581	17.17153549	17.36928749	16.88455582	16.96006203	17.01471901	A0A0A6YYL4	CORO7-PAM16
13.56449795	13.84680939	12.64333534	13.09414959	13.04217911	13.41484451	13.52168465	13.36285973	12.78726864	13.26225376	A0A0B4J1S3;H3BLT4;O15392	BIRC5
11.64289856	11.93054771	12.07988358	11.74907112	12.4147644	8.870014191	8.645094872	11.92355824	11.72946262	11.97582626	A0A0B4J1S8;E9PL47;F8W860;Q9UBF8	PI4KB
13.16957283	13.43715477	13.74147034	13.30990028	13.38126659	13.68330288	13.11818695	13.75504684	13.6996479	13.5053072	A0A0B4J1V9;Q9NRZ9	HELLS
17.11552238	16.91135979	17.19682884	17.21709633	17.26342964	17.00645447	17.05151939	17.05218697	17.21916771	17.10889816	A0A0B4J1W3;Q9BXJ9	NAA15
19.57098007	19.7894268	19.57501221	19.53633881	19.4247551	19.63344193	19.60404205	19.48274422	19.48121262	19.44908905	A0A0B4J1Z1;C9JAB2;Q16629	SRSF7
12.28441906	12.55064774	13.07158947	12.30790329	11.45749855	12.94301414	12.73804855	10.16096497	12.56037045	10.66376019	A0A0B4J293;H0YKX0;H0YMG4;Q96EP0	;RNF31;RNF31;RNF31
11.49583435	10.67607975	11.82047939	10.41952705	11.48414993	11.42398453	11.08649731	10.94701767	11.9266243	10.65972328	A0A0B4J2A0;Q9UHJ6	;SHPK
17.90880203	17.87351227	17.92479324	18.02856827	18.0339489	17.32411385	17.27297211	17.76525116	17.64406395	17.72601318	A0A0B4J2B4;K7ELC2;K7EM56;P62841;S4R417	RPS15
18.29070854	18.1493988	17.9263649	17.9856739	18.00460815	17.81168175	18.16935349	18.02816772	17.73469925	18.09739304	A0A0B4J2C3;P13693;Q5W0H4	TPT1
14.40517426	14.30473137	14.79668713	14.71595764	14.77010727	14.78107929	14.63870811	14.7585535	15.05521679	14.74269104	A0A0B4J2E5;Q15269	LOC102724159;PWP2
10.65311146	11.66075325	11.70254326	9.779421806	11.52047634	10.99634361	11.6269598	11.25557232	10.80759811	11.83707523	A0A0C3SFZ7;E7EUL6;Q03112	MECOM
14.66843987	14.11374569	14.62537479	14.4578743	14.63737869	13.82152557	14.38799667	14.28264523	14.75256729	14.29541016	A0A0C4DFL7;Q16850	CYP51A1
14.96097279	14.81591034	15.35199451	15.31224728	15.34860611	15.24635983	14.84872246	15.17458534	15.57783222	15.1743288	A0A0C4DFM1;Q92544	TM9SF4
12.60226917	11.86128616	11.49418068	10.8946352	11.77565384	11.38221836	11.55686188	11.62367439	10.47579479	11.44183731	A0A0C4DFM7;E9PKX1;E9PKY2;Q5TAX3	TUT4
15.08791828	15.46345806	14.82100677	14.91664505	14.62315178	15.11222267	14.96953773	15.11189079	14.62282372	14.78713512	A0A0C4DFS6;Q9C004	SPRY4
17.95196533	18.17905998	17.83275604	17.77435684	17.90291786	17.82395363	17.81907272	17.98125839	17.72742271	17.82078934	A0A0C4DFT3;A0A590UJ08;A0A590UJD9	DLG1
15.06581306	15.10472298	14.87347412	14.82150745	14.63629055	14.65808296	14.71098232	14.74467945	14.74903488	14.72205162	A0A0C4DFX9;Q9H3P2	NELFA
8.492976189	10.19623375	10.0286684	10.96846104	9.726157188	8.785447121	8.633115768	8.193778992	10.39903069	8.530446053	A0A0C4DFY5;A8MXZ4;Q9NQ84	GPRC5C
20.71202278	20.53734589	20.69364929	20.83405495	20.79915428	20.0337925	20.34123611	20.65435028	20.73161888	20.74974823	A0A0C4DG17;C9J9K3;P08865	RPSA
14.04804039	13.90664577	13.97237873	13.59740543	13.86378956	13.59822273	13.78353691	13.65839577	13.52979851	13.88788319	A0A0C4DG21;A0A7D9NKC8;E7EP65;E7EW77;F8WAL6;Q9NYB9	ABI2
13.1875782	14.14868641	13.07070827	13.00770664	13.04592228	13.10946846	12.63807106	13.18880367	13.10275364	13.09245682	A0A0C4DG62;F5GYV5;F8WCT1;H7BZV4;Q66PJ3	ARL6IP4
13.82000637	14.13878536	13.51088238	13.57792187	13.52735519	10.39217472	12.56571293	13.66374969	13.45159245	13.47473049	A0A0C4DG68;Q8TB72	PUM2
11.967206	12.25867748	11.08285999	9.861166954	10.51488113	11.68233871	11.23450851	11.82438946	10.19980049	11.41717529	A0A0C4DG78;Q8TBC5	ZSCAN18
13.92497253	13.78734016	13.88218212	13.60941029	13.75965309	13.76920033	14.09826565	13.60177708	13.75449944	14.01939106	A0A0C4DG88;P14859	POU2F1
12.05236626	12.91218758	13.51979828	13.16470814	13.06652546	13.5604353	13.57044601	12.97934341	13.47445202	13.23916817	A0A0C4DG91;A0A2R8Y547;A0A2R8Y7V2;C9J9V6;C9JQB1;O75414	NME6
14.1941967	13.95117569	14.24551678	13.75179672	14.18270111	14.02300072	14.15615082	14.22499752	14.4056673	13.9444685	A0A0C4DG98;Q8NI27	THOC2
17.58637428	17.64399338	17.39616394	17.36933517	17.46623993	17.62829781	17.55119324	17.50400925	17.44564247	17.42506027	A0A0C4DGA2;O75521	ECI2
12.60527992	12.48968887	12.09580517	12.23807812	12.37009525	12.40866375	12.00787449	12.92525387	12.83005619	11.96222687	A0A0C4DGA6;Q14527	HLTF
19.87127876	19.68903542	19.28191757	18.90532112	19.22729301	19.3147583	19.59434891	18.86561203	18.3886013	19.34672737	A0A0C4DGB6;ALBU_HUMAN;P02768	ALB;;ALB
11.91099739	12.96973991	12.70345879	12.51607037	13.0456953	13.33572483	12.57975864	13.47281551	13.18097401	12.94505024	A0A0C4DGE4;A0A0J9YW33;A0A286YF28;Q13277	STX3
15.2364893	15.32636642	15.35331821	15.33949947	15.35916424	15.34457397	15.12358952	15.08058643	15.57992458	15.31710625	A0A0C4DGG1;Q9UKS6	PACSIN3
16.89925385	16.89380836	17.07931137	17.02354622	17.0293045	16.88719559	16.80796051	17.07413864	17.00319862	16.94081116	A0A0C4DGG9;A0A2R8Y212;A0A2R8Y425;A0A2R8Y521;A0A2R8Y5J0;A0A2R8YFD8;A0A2R8YFK9;A0A2U3TZM0;F5GWX5;Q14839	CHD4
12.11393642	10.40825653	11.93625641	11.38911915	11.78687	11.18892956	10.9600172	10.80091476	12.49411583	10.11212349	A0A0C4DGH0;Q5ZPR3	CD276
11.77976131	11.71308899	11.42224598	9.773882866	11.54261112	12.05565453	12.76926804	12.44172192	12.4395895	12.27604294	A0A0C4DGM9;B7Z896;F5H3M2;Q9BVG8	KIFC3
13.73171616	14.43894577	13.58502007	13.4665575	13.76660633	13.99518299	13.86653519	13.86916733	12.99092197	13.66435623	A0A0C4DGN6;J3QRU8;Q9Y2X7	GIT1
16.91645432	16.96348381	17.0520401	17.20971298	16.91724396	17.12789917	16.95452499	17.03953743	17.30673599	17.10089493	A0A0C4DGQ4;Q86W25	NLRP13
14.39829731	14.79052544	14.30609703	14.30399799	14.32629871	14.35655117	14.36058617	13.93104172	14.24553204	14.12366486	A0A0C4DGQ6;Q96P16	RPRD1A
13.12973976	12.89113617	13.32585526	12.45152664	13.42510891	12.73775768	12.95954514	12.72971344	12.86043739	12.99997425	A0A0C4DGQ7;C9JRL6;K7EII6;K7EIK7;K7EKG3;K7ELI8;O95834	EML2
15.4744482	15.539114	15.74934006	15.61875153	15.71997738	16.00318336	15.60377121	15.67094135	15.74877357	15.64188957	A0A0C4DGQ8;Q6IAN0	DHRS7B
18.68577003	18.66229248	18.85299301	18.93438148	18.86248779	18.97787094	18.67003822	18.95490074	18.98548317	18.95058441	A0A0C4DGS1;P39656	DDOST
16.18412018	16.44426918	15.93624496	16.06620407	16.09109688	16.8024044	16.57511902	16.09558296	16.48417854	16.28699303	A0A0C4DGS9;Q9Y6K0	CEPT1
11.20010948	10.51741695	11.39857578	10.98406982	10.5685482	8.001735687	11.81693745	11.05527306	11.00794792	11.02193928	A0A0C4DGT3;A0A2R8Y695;A0A2R8Y7T6;A0A3B3IRZ4;A0A3B3IU98;Q6DN90	IQSEC1
14.27276611	14.75271034	14.28689671	14.17347336	14.49691868	14.28712559	14.71675873	14.8568449	14.51948547	14.44796181	A0A0C4DGV4;E9PLX3;O43504;R4GMU8	LAMTOR5
13.27338696	13.2752552	13.40428543	12.2576437	13.57149696	13.33294678	12.93385983	13.48917103	13.83382702	13.38542652	A0A0C4DGW0;A0A3B3IRK3;B4DGY6;H7C5F7;Q9NV92	NDFIP2
15.06577301	15.10892391	15.32631969	15.1458807	15.27207184	15.20866966	14.91646481	15.24653625	15.43913269	15.05345726	A0A0C4DGX4;A0A590UJ50;Q13616	CUL1
13.5663166	13.86522102	13.63844299	13.56829834	13.40776634	13.67409325	13.41107941	13.65257645	13.23396111	13.59598827	A0A0C4DGX7;H7C2T5;Q9Y2G5	POFUT2
13.3473568	13.36028576	13.91195488	14.19161797	13.99802399	11.43180561	14.31336975	13.81517696	13.92730427	14.05969238	A0A0C4DGY8;D6RA00;Q9UHY7	ENOPH1
14.33175755	14.45396805	13.81455231	13.89658642	13.93460751	13.61737442	13.90771484	14.15026474	13.96038914	14.11268902	A0A0C4DH16;B8ZZS0;E9PHY4;H7BXT7;Q9NYM9	BET1L
14.9567337	14.91083622	14.98881054	14.82710075	14.77090645	14.819314	14.74662971	14.82715607	14.95998669	14.69146347	A0A0D9SEI3;A0A0D9SEN2;A0A0D9SER5;P21127	CDK11B
15.30325603	15.10460854	14.74535179	14.47421265	14.79988098	14.07150364	14.66259384	15.12847996	14.62676144	14.34825039	A0A0D9SEM4;Q08170	SRSF4
15.21818161	15.43852425	14.74809074	14.9113636	14.7664032	14.94712067	15.03993702	14.80539894	14.62620354	14.77821064	A0A0D9SES8;H0YKN8;H0YKT5;H0YL70;H0YNT2;Q04726	TLE3
12.73256683	12.20355701	12.67200279	12.40283012	12.27029228	12.32991314	12.67177773	13.18303871	12.51619911	12.08479595	A0A0D9SEU5;Q6VN20;R4GMX8	RANBP10
14.07925892	14.19880772	13.28714943	13.3195982	13.65624237	13.85654259	13.58609486	13.67021751	13.23168755	13.47089958	A0A0D9SEY1;E7EN19;E7ENQ1;G3XAA2;G5E948;H7C360;O95819	MAP4K4
19.25027275	19.17884064	19.31412888	19.24239731	19.3105011	19.171772	19.31449699	19.1936779	19.23166275	19.1855545	A0A0D9SF53;A0A0D9SFB3;A0A0D9SG12;A0A2R8Y4A4;A0A2R8YF78;A0A2R8YFS5;O00571	DDX3X
13.03020382	12.84377861	13.29287434	13.18119144	13.56744194	12.59089947	12.41155338	12.02781582	13.23596001	13.1895256	A0A0D9SF54	SPTAN1
12.60206223	11.81992245	12.70977116	12.03030777	12.42639065	12.36557293	12.00106621	12.6598835	12.96925354	12.63075066	A0A0D9SF60;Q99569	PKP4
14.58966446	14.16857815	14.82196045	14.5187254	14.83469677	14.60392761	14.60124779	14.56527328	14.91220951	14.73630238	A0A0D9SF63;Q9BZK7	TBL1XR1
12.7385025	12.56553173	12.76874828	12.82038021	12.95877838	12.76371479	13.16009998	12.7881794	13.37660885	13.01171017	A0A0D9SFB0;A0A0D9SFI6;A0A0D9SFZ9;A0A0D9SGB2;A0A494C0D6;Q13642;Q5JXH7;Q5JXH8;Q5JXH9;Q5JXI0;Q5JXI2;Q5JXI3;Q5JXI8	FHL1
12.64320183	13.67209721	14.2574482	14.12154293	14.27598953	14.59844017	14.10244083	14.16561604	14.45270157	14.24326229	A0A0D9SFG6;O43739;Q15438;Q99418	CYTH2;CYTH3;CYTH1;CYTH2
15.8975172	15.55755806	15.72432041	15.39463806	15.65750504	15.15919876	15.44047165	15.36109829	15.51659107	15.27649975	A0A0D9SFK2;Q92614	MYO18A
14.83072853	14.82784748	14.54382896	14.40155983	14.41762066	14.58201027	14.58367157	14.28869438	14.54137611	14.31236935	A0A0D9SFL2;M0QYH2;Q96T60	PNKP
13.73995399	13.63758087	14.45021534	14.53453922	14.31110191	13.89341354	14.05133152	14.05067158	15.06961536	14.51893139	A0A0D9SFM0;Q149N8	SHPRH
16.95083618	16.7739296	16.84604263	16.73325348	16.7394886	16.55726242	16.23396492	16.8069973	16.1636219	16.56077766	A0A0D9SFP2;A0A1W2PNM1;Q16836	HADH
15.46938515	15.61416054	15.70903587	15.7164278	15.6138649	15.66479588	15.7361002	15.4297533	15.44609356	15.64944935	A0A0D9SG71;A0A0R4J2E5;P49459	UBE2A
14.49570465	14.61664295	14.36555767	14.36456871	14.4438448	14.4399271	14.48367977	14.36557388	14.33586025	14.31490135	A0A0D9SG72;A0A1B0GTP9;A0A1B0GVQ5;A0A1B0GWF2;A0A2R8Y5D4;P61764	STXBP1
13.8558073	13.58117485	13.43700314	13.79401016	13.69658184	12.53704453	12.33735943	13.70332623	13.19452667	13.85521221	A0A0D9SGD3;E5RG17;E5RGF2;G5EA19;H0YBX2;Q6P1N9;U3KQS5	TATDN1
14.76752663	14.75034428	14.74659634	14.48198605	14.2857666	14.36381817	14.41998196	14.50035	14.72858524	14.40871716	A0A0D9SGE8;Q8IWS0	PHF6
12.75363064	13.0550127	13.18149948	13.34108829	13.05403519	13.14013004	13.00083828	13.41463757	11.43464851	13.29791927	A0A0D9SGK2;A0A3B3ISR8;Q93096	PTP4A1
17.47114754	17.02407074	17.05561447	16.922369	17.1274395	16.0969944	16.06749916	17.00950432	16.40831566	16.82328033	A0A0G2JH50;A0A0G2JIF0;A2BF26;Q5RIP0	HLA-C
16.40418243	16.48443794	16.46359062	16.70980072	16.50523949	16.6809082	16.56541634	16.69071007	16.53864861	16.68287086	A0A0G2JH68;O60610	DIAPH1
16.66527557	16.79307175	16.27688789	16.40469933	16.31158257	16.4052887	16.63054848	16.42123985	16.28238869	16.47803307	A0A0G2JHC2;Q6NYC8	PPP1R18
21.01165199	20.91056824	21.02521515	21.00955391	20.98765945	20.75050926	20.92534065	20.8985672	20.88559532	20.94951248	A0A0G2JIW1;P0DMV8;P0DMV9	HSPA1B;HSPA1A;HSPA1B
15.31546021	15.32299614	15.43742847	15.42914391	15.3874321	14.97114658	15.0997057	15.32302475	15.3293457	15.35799026	A0A0G2JJD3;O95870	ABHD16A
14.9064455	14.99941254	14.93959618	14.65962505	14.73113918	15.20416641	15.56606102	14.6033802	14.83908272	14.51000977	A0A0G2JJL1;A0A140T9L0	WDR46
13.90994644	13.62604713	13.51941586	13.40623093	13.60738087	11.72432709	11.0875845	13.57016182	13.35368919	13.45936394	A0A0G2JKR7;P28702	RXRB
11.62854576	12.51952839	13.04522133	11.49187374	12.42284393	11.66646481	13.05592346	11.93504238	12.61388016	12.19499493	A0A0G2JL54;A0A0G2JPR0;A0A140TA29;A0A140TA32;A0A140TA44;A0A140TA49;F5GXS0;P0C0L4;P0C0L5	C4B_2;C4A;C4B;C4A;C4A;C4A;C4B;C4A;C4B
13.51863956	13.24469376	10.23652649	12.36361694	13.09724712	11.22934818	13.28924274	12.73622704	12.80781746	12.51067543	A0A0G2JLX3;A0A0G2JMG8;A0A0G2JNC8;A0A0G2JP37;A0A0G2JPB6;A0A0G2JPQ2;J3KN39;Q9NX02	NLRP2
14.45884037	13.82811165	14.06915188	13.20295238	13.61015511	13.62658501	13.21227551	14.02015495	13.77142048	13.74696636	A0A0G2JMZ8;Q16625	OCLN
16.0239296	16.04727745	15.98102951	15.70092678	15.91493511	15.90751839	16.07715225	16.03777695	15.84717369	15.89718246	A0A0G2JNZ2;A0A0G2JPP5;A0A669KB89;Q14160	SCRIB
15.46149158	15.66882706	15.49890995	15.4348259	15.55066776	15.57960701	15.46593666	15.68721104	15.33227634	15.47349358	A0A0G2JQ41;A0A1C7CYZ0;Q12979	ABR
14.38810349	14.25474358	14.49421883	14.16502476	14.22137833	14.35964775	14.08534431	14.42019939	14.08490753	14.1580677	A0A0G2JRA5;B0QYV1;O43251	RBFOX2
17.93083382	17.71979523	18.22409439	18.15098953	18.0829525	18.08379745	18.07588005	18.00509262	18.33125114	18.08852386	A0A0J9YVP6;A0A0J9YYL3	PUF60
12.0554533	10.91740131	12.68784714	11.76202965	12.90210056	12.71463966	12.33071709	13.16911697	12.44623852	12.13316822	A0A0J9YXF2	PON2
19.04536247	19.09434509	19.10929489	19.0310955	19.04277992	19.0163765	19.00238037	19.13968468	18.99230385	19.04398346	A0A0R4J2E8;A8MXP9;P43243	MATR3
16.80302811	16.93771935	16.55994797	16.41614723	16.46030807	16.76516533	16.97243309	16.6926384	16.71274757	16.62056732	A0A0R4J2F3;P0DPB6	POLR1D
13.12963486	12.63027382	13.09118938	13.04170799	12.96269608	13.11743641	13.50685692	12.98601723	13.31316757	12.88597965	A0A0R4J2F6;H7C444;Q12894	IFRD2
12.4140892	12.76455784	10.56018925	11.3693943	11.47710419	11.57881927	11.3690691	12.26162624	13.81377888	12.28130627	A0A0S2Z5D0;A0A1B0GTU6;A0A1B0GTV3;A0A1B0GUD2;A0A1B0GW73;H3BNF1;H3BRN7;H3BTY4;H3BUT1;H3BUV4;Q9NWW5	CLN6;CLN6;CLN6;CLN6;;CLN6;;CLN6;CLN6;CLN6;CLN6
13.21890163	13.4107666	12.98837757	13.13543701	13.17260742	13.20895863	13.41269875	13.41012859	13.43634129	13.56147575	A0A0S2Z5G5;A0A3B3ITY2;Q9H2C0	GAN
15.34654999	15.27244949	15.16786861	15.41809368	15.36387348	14.5345068	14.51174927	15.16784954	15.34592438	15.29387951	A0A0U1RQC9;P04637	TP53
14.78198147	15.76358795	14.83856964	15.37065697	14.63103104	15.54275608	15.04612827	15.49060059	14.73763752	15.40252972	A0A0U1RQM0;H0YMA4;Q15004	;PCLAF;PCLAF
13.34869289	13.38691998	12.96483898	13.06229305	13.14349079	13.13234329	12.90233135	12.99686337	13.43702793	13.42112827	A0A0U1RQQ9;Q6P3W7	SCYL2
14.41702938	14.49172115	13.5201807	13.73997307	13.96637726	14.69496727	15.17852592	14.8614006	13.0111599	14.08149624	A0A0U1RQS5;A0A0U1RQV1;B3KNS4;Q96A10	ERVK3-1
16.35458565	15.97693062	15.64499474	15.44758415	15.96076965	15.60581303	16.30234337	15.91230297	15.21249199	15.69291496	A0A0U1RQT8;Q8TCZ2	CD99L2
16.42158508	16.18501282	16.96384811	16.60039711	17.032547	17.00897598	16.6286068	16.9014473	17.38908005	16.88440895	A0A0U1RQT9;C9JYN0;Q16563	SYPL1
13.64831829	14.01735973	13.45990944	13.18899155	13.53393745	13.60752106	13.84011555	13.6911211	13.82001781	13.88387394	A0A0U1RQX8;A0A1B0GW38;P22681	CBL
20.2930584	20.11322784	19.87332344	19.96424103	19.9489212	18.80879974	19.15617561	19.61949539	19.8547802	19.78809929	A0A0U1RR32;A0A0U1RRH7;P0C0S8;P20671;Q6FI13;Q96KK5;Q99878	hCG_2039566;;H2AC11;H2AC7;H2AC18;H2AC12;H2AC14
13.99344063	14.1640501	13.82655144	12.75521755	13.50261784	14.0215826	14.2387991	13.85265064	13.93636513	13.81288528	A0A0U1RRB6;Q9Y2D4	EXOC6B
13.06750965	13.33072567	13.12214375	13.00565624	13.22426414	13.0291214	13.04553413	13.28581905	12.93415546	12.97373009	A0A0U1RRH6;B4DG57;O94880	PHF14
13.54691315	13.55665016	13.24244595	12.92244339	13.65163326	13.66606617	13.65994644	13.44570827	13.30540562	13.15330696	A0A0U1RRK1;A0A286YF11;F6XEV2;Q9BPX6	MICU1
12.15010166	11.73274708	11.6579628	11.56044102	11.73159504	12.4091692	12.71899414	11.7535162	11.96323204	12.13537788	A0A0U1RRL5;P32519	ELF1
15.75312614	15.70318985	15.588974	15.33508587	15.49744511	15.59097958	15.65021229	15.48342705	15.56948185	15.50422668	A0A0U1RRM1;Q8WXI9	GATAD2B
14.61127758	14.45548058	14.84431744	14.61539555	14.80354023	14.66007233	14.81341743	14.69752598	14.98087597	14.87509441	A0A0U1RRM6;Q8N8S7	ENAH
14.73051739	14.81591225	14.31909561	14.4307642	14.50210094	14.57610989	13.91373062	14.56024837	14.22528648	14.28289223	A0A140T913;A0A140T933;A0A140T955;A0A140T9I0;A0A140T9X5;A0A1W2PRT9;Q53Z42	HLA-A
15.69158936	15.84380245	16.09561729	15.87073994	16.05621147	15.96840286	15.94299984	15.92656612	16.20603943	15.82137871	A0A140T9D4	HLA-B
15.9671011	16.07704735	15.82614231	15.747015	15.68811035	15.9810009	15.75754356	15.97279453	15.68222809	15.7642231	A0A140T9T7;Q03518	TAP1
14.19715405	14.14446259	13.95363808	13.87612057	13.95599174	14.19155788	13.9481163	13.90949631	13.69170761	13.89468861	A0A140TA01;A2AB23;E9PQT8;E9PQZ5;O43189	PHF1
13.96136093	14.37140274	13.86172867	14.14819813	13.70665073	14.06517506	14.13596344	14.02371025	13.69657421	14.03799152	A0A140TA09;Q99942	RNF5
14.89548111	14.72206402	14.60974598	14.60469341	14.60988617	14.79684258	14.6783247	14.73402596	14.32427883	14.65375137	A0A140TA86;Q5XKP0	MICOS13
7.463180542	11.56984234	11.89824963	11.27320766	9.847927094	11.73322105	11.47684956	11.84443474	12.01221085	12.29269981	A0A182DWI4;E9PN30;Q9BQE4	SELENOS
14.16771984	13.89349651	14.0612936	13.73557854	14.14033604	14.08225155	14.04312038	14.0388279	14.02064705	13.98041534	A0A1B0GTB0;A0A1B0GVB9;A0A1B0GVW0;A0A1B0GWJ8;A0A1C7CYW4;H7C3E1;O75787	ATP6AP2
12.64132309	11.88752556	12.46421623	12.29596138	12.26375484	12.29221725	12.24143314	11.61675072	12.4158783	12.46117878	A0A1B0GTC3;A0A1B0GTC5;A0A1B0GTY1;A0A1B0GU26;A0A1B0GUC3;A0A1B0GV98;A0A1B0GVH5;Q9C0B1	FTO
18.02013969	17.87350464	17.76183319	17.75034714	17.80036926	17.74461174	17.67620659	17.62968636	17.60918045	17.66129494	A0A1B0GTG2;A0A1B0GW77;P49419	ALDH7A1
15.36904526	15.48256493	15.02460003	15.08193207	15.20683289	15.38000202	15.32766151	15.49315548	15.01211262	15.30435562	A0A1B0GTL5;Q9BXF6	RAB11FIP5
12.85583019	12.69987869	12.85974884	12.22841358	12.86144543	12.65030575	12.49351883	13.0718317	13.25207806	12.85953712	A0A1B0GTM3;A0A1B0GTP7;A0A1B0GTZ5;A0A1B0GUA4;A0A1B0GUG1;A0A1B0GUH5;A0A1B0GW68;E7EMM4;Q13510	ASAH1
14.01866531	14.08663654	12.54736423	13.30347347	13.57092667	13.42737389	14.42279816	14.50818348	11.42310429	13.28373432	A0A1B0GTN0;A0A1B0GUN6;Q01668;Q59GD8	CACNA1D
14.98323631	15.1580143	14.74816799	14.80982971	14.94876957	14.79890347	14.93099213	14.99388123	14.83422565	15.09986877	A0A1B0GTU4;F5GZ78;P49023	PXN
14.95109653	15.45290756	14.90192127	15.73579311	15.64011002	12.02305698	15.36108303	12.80630493	15.65589905	15.49337864	A0A1B0GTW6	EPB41L1
15.74715614	15.73094368	15.24919224	15.36800289	15.33690548	15.47639751	15.35149765	15.36753368	15.237463	15.35923958	A0A1B0GU86;Q03154	ACY1
15.64289761	15.50948143	15.9181366	15.63733101	16.07442474	15.54909992	15.63440418	15.65721321	15.95026112	15.77202225	A0A1B0GUA3;Q96EK5	KIFBP
12.56969357	12.043437	11.92128277	11.96467304	12.19829273	12.2793684	12.2454567	12.39179993	12.28276634	12.07226753	A0A1B0GUA8;Q9H1H9	KIF13A
16.8664093	16.81046104	16.4234581	16.49251938	16.33137321	16.65241623	16.91075325	16.32689285	16.14544487	16.4298172	A0A1B0GUW5;C9J9B2;C9JIJ9;E7EPF2;E7ETU5;F6Y5H0;P29558;Q6XE24	RBMS3;RBMS3;RBMS3;RBMS1;RBMS1;RBMS1;RBMS1;RBMS3
12.79623699	12.5380497	12.99270344	12.31554222	12.71217251	12.59146595	12.2089138	12.81065845	12.42253304	12.65765953	A0A1B0GUZ7;Q14156	EFR3A
13.95022106	13.68427372	13.75663185	13.3101759	13.77256393	13.57931423	13.74307442	13.84290791	13.44699287	13.57030106	A0A1B0GV09;Q9H9B1	EHMT1
19.40509415	19.38876152	19.6402607	19.49913788	19.7255249	19.67216873	19.45670128	19.37759018	19.6221714	19.48866653	A0A1B0GV23;A0A1B0GWE8;C9JH19;CATD_HUMAN;P07339	CTSD;CTSD;CTSD;;CTSD
10.6503315	10.71662903	10.70252705	10.97341347	11.26965809	10.7612133	9.882304192	10.97915077	11.46637821	9.620566368	A0A1B0GV47;Q7Z4S6	KIF21A
13.13848686	13.19504833	12.82445526	12.4891758	12.70487976	12.91640854	13.22529602	12.55191326	13.01441097	12.71080208	A0A1B0GV57;Q9NYJ8	TAB2
17.06881714	17.12480354	17.53244591	18.16802979	17.66383934	17.21649933	18.61158371	18.20808411	17.92041397	18.87644958	A0A1B0GVI3;K1C10_HUMAN;P13645	KRT10;;KRT10
10.01259232	12.1609993	12.39224243	12.71591663	10.82467556	12.08907223	11.58815098	12.6897459	13.42698765	12.48139191	A0A1B0GW05	DPY19L1
13.82368755	13.4441576	13.37156105	13.24171734	13.45170021	12.95586777	13.56023216	13.01772499	13.49111748	13.54553223	A0A1B0GWC2;A0A1B0GWF3;F5H8H2;Q03426	MVK
12.91206455	12.93119335	12.86928368	12.65389824	12.80705547	12.87875557	13.15818977	12.54507923	13.08432102	12.75344086	A0A1C7CYW6;P0DI83	RAB34
13.57848454	13.93732071	13.49003315	13.26220703	13.18516254	13.34332085	13.4945879	13.2493248	13.29003239	13.35751247	A0A1C7CYX1	MIDEAS
14.46281147	14.78747845	14.22121334	14.68059635	14.17125607	14.45014954	14.52556133	14.38799286	14.41136551	14.75321865	A0A1C7CYX8;C9J6N5;C9JQ40;C9JW51;Q9H098	FAM107B
15.69918633	15.91964531	15.91538143	16.15411377	15.91162586	16.15462112	15.87272549	16.12949944	15.93732166	16.08622932	A0A1C7CYX9	DPYSL2
17.1838398	17.36549187	17.0734024	17.2186451	17.01374626	17.34486008	17.05520821	17.28938103	17.01817131	17.15841866	A0A1P0AYU5;Q9BWM7	SFXN3
11.49411488	11.15067577	11.26561165	11.63201714	11.90154457	11.05465412	10.59236622	11.85719109	11.9832058	11.77212143	A0A1W2PNF0;A0A1W2PNY6;A0A1W2PPE6;A0A1W2PPG9;A0A1W2PPH4;A0A1W2PQ13;A0A1W2PQ60;A0A1W2PQD6;A0A1W2PQH2;A0A1W2PQL8;A0A1W2PR66;A0A1W2PRN3;A0A1W2PRT7;A0A1W2PS45;A0A1W2PS77;A0A1W2PSA9;A0A1W2PSD1;Q9Y2D2	SLC35A3;SLC35A3;;;SLC35A3;;SLC35A3;;SLC35A3;SLC35A3;SLC35A3;SLC35A3;SLC35A3;;;;SLC35A3;SLC35A3
11.82419777	11.73463917	12.95391178	13.18190384	12.97652626	12.27803516	11.32133484	12.87815571	13.21652985	12.77614021	A0A1W2PNP0;Q969N2	PIGT
15.59286213	15.50656891	15.91322517	15.89370155	15.96586037	15.67627335	15.56420612	15.63325214	15.89173698	15.75731373	A0A1W2PNV4
15.77910519	15.75831413	15.80928135	15.72797585	15.82042694	15.75220108	15.82738113	15.85182667	15.80962467	15.89753342	A0A1W2PNX8;Q9H3U1	UNC45A
13.48074341	14.01293659	13.69380188	13.2006855	13.61448574	13.89174652	14.03428841	13.88493252	13.8312912	13.81973553	A0A1W2PP04;Q9Y388	RBMX2
13.80670357	14.06591797	14.21043205	14.12042332	14.05773354	11.71869278	12.77998829	14.06560707	13.81002235	13.87142849	A0A1W2PPG1;A0A1W2PPG5;A0A1W2PPP5;A0A1W2PQM3;A0A1W2PRC2;A0A1W2PRV0;A0A1W2PS81;A0A1X7SBU8;E7EQ34;I3L4Z6;I3NI02;O14653	GOSR2;GOSR2;GOSR2;GOSR2;GOSR2;GOSR2;GOSR2;GOSR2;;GOSR2;GOSR2;GOSR2
13.97342682	13.91806507	14.14255619	13.95639133	13.89998913	14.0119648	13.99716759	13.9722271	14.11356544	13.93876934	A0A1W2PPT2;Q15906	VPS72
13.74709988	13.65443802	13.92651939	13.6666193	14.09525776	13.95396042	13.55913925	13.94841576	14.0744009	14.06436157	A0A1W2PPX5;A0A1W2PQB7;A0A1W2PQR6;A0A1W2PRS1;A0A1W2PS43;Q14108	SCARB2
16.66242599	16.80954552	16.24720001	16.39765739	16.40262032	16.53482628	16.6666584	16.37402916	16.39970207	16.50830841	A0A1W2PPZ5;P23193	TCEA1
15.22814178	15.28920364	14.91153812	14.76704311	15.01370716	14.91728401	14.98731232	15.13850307	14.77921104	14.87316704	A0A1W2PQ90;Q92878	;RAD50
17.38397408	17.37677956	17.29258156	17.28078842	17.27890968	17.33638191	17.11013222	17.3640213	17.36080742	17.33460617	A0A1W2PQT3;A0A1W2PQY8;A0A1W2PR68;P23368	ME2
15.54398727	15.62535477	14.0713625	13.6473484	14.39159107	14.99272442	15.48950481	14.68363094	13.75706291	14.20850182	A0A1W2PQV2;H3BUH9;P23434	GCSH
12.78626823	13.68261242	12.90864849	12.3433218	12.7010498	13.59464455	13.27952671	13.86822033	13.32889271	13.34401608	A0A1W2PR17;Q16875;Q5VX20;Q5W015	PFKFB3
10.37575531	13.31637001	12.73973274	12.08123207	12.828372	12.23050404	11.80848694	12.23161125	11.6174469	13.03522587	A0A1W2PR28;A0A1W2PRJ5;A0A6Q8PFR7;Q5JU85	IQSEC2
13.80376339	13.73302746	13.5865097	13.43897247	13.61907959	13.65108013	13.72666359	13.50050926	13.57743645	13.52451801	A0A1W2PR85;O15056	SYNJ2
15.26553535	15.48344517	15.07943058	15.13168335	14.97640514	15.05994415	15.14706898	15.16634178	15.09529686	15.07549953	A0A1W2PRB8
16.0593586	16.11809349	15.88076973	15.77567959	15.78462315	16.02069283	16.20384026	16.07279968	15.72440147	15.97549438	A0A1W2PRV5;E7EQZ4;Q16637	SMN2;SMN1;SMN1
13.86170387	13.75772285	13.84550571	13.7254591	13.92901707	13.85713005	13.79500771	13.89907551	13.84211349	13.86516476	A0A1W2PS05;A8MYT4;Q8NEB9	PIK3C3
18.90131569	18.77184677	18.74452209	18.68598175	18.85596466	18.58097267	18.36262703	18.73117828	18.88169289	18.60212708	A0A1W2PS24;P04439;Q5SRN5;Q5SRN7	HLA-A
17.66973877	17.66994476	17.52815819	17.34970093	17.44006538	17.31907463	17.51765633	17.26185417	17.41901588	17.24842072	A0A1X7SBZ2;Q92841	DDX17
14.5812149	14.27964783	14.60571003	14.36213398	14.69969463	14.15891552	14.54611874	14.62193012	14.25269127	14.45329189	A0A286YEX4;P08651	NFIC
13.47729206	13.33482552	13.1626215	13.06193256	13.12342548	13.06450367	13.09751606	12.4871273	13.29465199	12.81073093	A0A286YEY6;A0A3B3ISY7;D6R9Q5;D6RA92;D6RD74;Q9UM13	ANAPC10;;ANAPC10;ANAPC10;ANAPC10;ANAPC10
15.95570755	15.97483635	15.38642597	15.55707455	15.30550766	15.61950588	15.63617897	15.4467783	15.15187359	15.2507019	A0A286YF22;A0A286YFA2;A0A2C9F2M7;O43175	PHGDH
16.30841637	16.3598671	16.3260231	16.39583397	16.30361748	16.49348831	16.33444977	16.33460808	16.40262794	16.38472176	A0A286YFF7;A0A2C9F2P4;P50897	PPT1
12.58683014	13.07770538	12.96507454	12.5442524	13.30768681	12.47600746	12.44073868	13.08127403	13.25138187	12.97399044	A0A286YFF8;Q7Z3U7	MON2
13.7700386	13.7761631	13.70976067	13.71795082	13.60352135	13.73644352	13.36316395	13.70501423	13.57412148	13.6107254	A0A2Q3DQE3;H0Y6G2;Q13555;Q5SWX3	CAMK2G
10.04560471	10.83117867	11.04480839	10.61015415	11.00828648	10.62214184	10.72447014	11.04415607	9.472216606	10.30061722	A0A2R8Y3M4;A0A2R8Y4L0;A0A2R8Y4L7;A0A2R8Y4M0;A0A2R8Y4Y7;A0A2R8Y632;A0A2R8Y6E8;A0A2R8Y6K2;A0A2R8Y6Z7;A0A2R8Y726;A0A2R8Y729;A0A2R8Y7B8;A0A2R8Y7E2;A0A2R8Y7N2;A0A2R8YDQ1;A0A2R8YFF4;A0A2R8YFJ7;A0A2R8YFN9;A0A2R8YFW4;A0A2R8YG79;A0A2R8YGV4;A0A2U3TZH1;Q9UQ90	SPG7
13.43259335	12.6791954	13.22142696	12.81599236	13.2857399	13.22131538	13.02759075	13.20384407	13.0366354	12.96931839	A0A2R8Y3N3;A0A2R8Y5P7;P49590	HARS2
11.24890041	11.43399715	10.74214172	11.44921875	11.31304932	11.92510605	11.24530792	11.37654877	10.61590004	11.56968403	A0A2R8Y432;A0A2R8Y4C1;A0A2R8Y589;A0A2R8Y5W6;A0A2R8Y7A4;A0A2R8Y7U5;A0A2R8YCP0;A0A2U3TZI9;A8MST6;Q5JTW2	CEP78
12.96540642	12.58213043	12.98203182	12.758708	13.12467003	13.00147247	13.18133068	12.92074394	12.98148251	12.8811388	A0A2R8Y473;A0A590UJS8;A0A5F9ZA98;B4DGL8;O75027	ABCB7
15.16487503	15.18466187	15.64491558	15.57355213	15.58255672	15.77005196	15.29540539	15.37633514	15.97821712	15.55744171	A0A2R8Y484;Q08722	CD47
14.52534103	14.51171398	14.3072443	14.28411007	14.53803539	14.65429688	14.52161503	14.46344185	14.32071304	14.63952351	A0A2R8Y4C2;A0A2R8Y596;A0A2R8Y5C9;A0A2R8Y5E4;A0A2R8Y6M6;A0A2R8Y8C4;A0A2R8YFK2;A0A2R8YFS8;P56945	BCAR1
15.4916544	15.64293957	15.43309689	15.14368725	15.39305592	15.33096981	15.47916508	15.50770664	15.39119816	15.41170979	A0A2R8Y4P4;A0A2R8Y7S2;P51532;Q9HBD4	SMARCA4
15.20215988	14.85385036	14.159132	15.06649208	15.12902641	15.20893002	14.41119289	15.17082977	14.91209412	15.17429638	A0A2R8Y4R4;Q01814	ATP2B2
11.20486355	12.27980804	11.97462559	9.76509285	12.0267086	12.18800068	11.43821812	11.94840431	11.9758625	11.31276989	A0A2R8Y4U4;A0A2R8Y7R1;A0A2R8YFL3;P15260	IFNGR1
13.81464767	14.03234673	13.63720226	13.23187733	13.735219	13.81022453	13.90333843	13.84279442	13.24453354	13.5296793	A0A2R8Y4W2;A0A2R8YE63;Q12929	EPS8
15.36542892	15.16404343	15.28050995	14.9852829	15.12978363	15.04748631	15.1840992	15.18759346	15.19649792	15.07021999	A0A2R8Y543;A0A2R8Y5A3;A0A2R8Y804;A0A2R8YCH5;P35222	CTNNB1
12.76190948	12.90821266	12.98503971	13.0419817	13.01592922	13.17134666	13.14929008	13.1365099	13.08940792	13.40091801	A0A2R8Y544;Q9BR61	ACBD6
13.7364769	13.6860218	13.62593842	11.62363434	10.75748634	13.8864193	13.32567692	13.74153614	13.97004414	13.21296215	A0A2R8Y549;Q8NI35	PATJ
12.83529568	12.73213005	12.28902245	12.32862663	12.37657833	12.40420055	12.60600281	12.30973911	12.99212456	13.2490139	A0A2R8Y566	RELCH
14.15586662	14.16551208	14.18152809	13.8637476	14.25275135	14.22392368	14.35530567	14.13617802	14.25772572	13.87138748	A0A2R8Y5A1;C9JAX1;Q16595	;FXN;FXN
15.59852409	15.66297626	15.45810413	15.27164745	15.36089134	15.44601822	15.5634861	15.37418652	15.5028801	15.45535374	A0A2R8Y5A6;A0A2R8YDM9	ATXN2
12.96945858	12.98443508	12.482481	12.8736887	12.88250065	13.07185745	13.0740118	12.92584229	12.96598816	12.80466366	A0A2R8Y5F1;A0A2R8Y6C9;A0A2R8Y7C8;A0A2R8Y7X5;A0A2R8YDR3;A0A2R8YDZ2;A0A2R8YGD6;A0A2R8YGU4;H3BMQ0;P49815;X5D2U8	TSC2
15.02309608	14.86593533	14.7614727	14.92380142	14.93220139	14.71448994	14.60168266	14.63378239	14.8637867	14.70463848	A0A2R8Y5Q8;A0A2R8YHI9;Q15813	TBCE
13.422925	13.40059948	13.43941784	13.172925	13.43990421	13.02085495	13.57606888	13.44442368	13.66229439	13.51024628	A0A2R8Y5S9;A0A2R8Y7Q9;A0A2R8YE59;A0A2R8YEK8;A0A2U3TZL3;Q9Y5P4	CERT1
11.20149994	12.33536625	11.77161694	11.32980061	11.69461536	10.57237148	9.99806881	12.19394016	12.84592342	11.94624805	A0A2R8Y602	CLPB
13.83275509	13.46768188	13.78521252	13.27805138	13.91247654	13.58745003	13.82710743	13.79860115	13.95869732	13.90857792	A0A2R8Y6W8;P19447	ERCC3
15.55212784	15.39842701	15.74876404	15.4657526	15.47385502	15.68332672	15.48329544	15.49956322	15.69020653	15.50518227	A0A2R8Y6Y7;A0A2R8YDQ9;Q9P2R7	SUCLA2
18.82985306	18.70161819	18.87665367	18.87050819	18.97296143	18.7851181	18.77185249	18.86990929	18.91926956	18.86109924	A0A2R8Y706;Q14204	DYNC1H1
13.36413002	13.42962074	12.9347105	12.77286243	13.11942577	13.0838871	12.91108894	13.06495476	13.01560211	13.01528931	A0A2R8Y7B1;Q3V6T2	CCDC88A
10.4932375	11.37054157	10.8688221	10.26763344	9.450864792	10.45565891	10.01559448	11.22375393	10.81830502	10.53577328	A0A2R8Y7Q1;E7ETD6;E9PE19;F5GXF5;Q12830	BPTF
13.96121311	14.25279045	13.8815527	13.9137764	13.91266251	14.02406502	14.16589832	14.05747128	14.02314281	14.17314053	A0A2R8Y7R9;Q13136	PPFIA1
19.47868156	19.51202202	19.40198898	19.43709946	19.39323044	19.46963882	19.65699005	19.36063194	19.45363617	19.33892059	A0A2R8Y811;P62263	RPS14
18.47709084	18.3155632	18.04782295	18.38203812	18.18132782	18.16525841	18.28610802	18.16471672	18.21696472	18.08276367	A0A2R8Y849;A0A2R8YD14;E7ETK0;P62847	RPS24
15.05724621	15.26024342	15.06237411	14.84379482	14.93511963	14.95589066	15.0029335	15.1348505	15.00362301	14.94309139	A0A2R8Y855;Q969G3	SMARCE1
15.25923157	14.62796021	15.21957207	15.12503815	15.30952072	15.00603294	15.13016033	14.95887089	15.23978233	15.101367	A0A2R8Y891;P08237	PFKM
17.30540657	17.140625	17.17113495	17.09240341	17.08840942	16.9743557	16.87726974	17.0068264	17.12809563	17.12264633	A0A2R8YD58;E7EU96;P68400	CSNK2A1
13.91950417	13.73376179	12.96341991	13.03795719	13.26218128	13.35347843	13.3823061	13.59493732	13.00667	13.50094223	A0A2R8YDB8;H7BXF5;Q9H0E3	SAP130
12.62539864	13.03753471	13.46821976	12.61525822	13.3140564	13.31825542	12.59547615	12.94663906	13.36330605	13.26511097	A0A2R8YDJ1;A0A5K1VW60;Q99766	DMAC2L
13.55696392	13.4426403	13.24942112	13.18723011	13.23204231	12.50240231	12.89914989	13.33294296	13.27399063	13.21328259	A0A2R8YDQ0;Q9H267	;VPS33B
11.13281059	11.99735737	12.11526299	12.39727879	12.65922451	9.926977158	12.22847366	11.09191036	12.2841959	12.04593182	A0A2R8YE54	OPA1
14.55430126	14.63232613	14.85945034	14.71668148	14.85504055	14.90670204	14.62659454	14.87983608	14.73295403	14.67671585	A0A2R8YE77;A0A2U3TZM1;O14936	CASK
15.2989502	14.72461033	14.86848068	13.40070152	13.88494015	14.15758133	13.69224548	14.42698669	13.32127476	14.06184483	A0A2R8YEG7;A0A7I2PJH0;A0A7I2PMC6;A0A7I2PRX0;A0A7I2R3P8;A0A7I2UNQ2;A0A7I2YME5;Q96P20	NLRP3
14.04452419	13.87762642	14.06622314	13.99755383	14.03411102	13.94843388	13.85921955	13.69276524	13.87108135	13.81292439	A0A2R8YEM2;D6RG18;D6RHI7;P51946	CCNH
11.5906744	12.22339249	11.87971306	11.69221401	11.54039764	11.64565372	11.41658497	12.17084122	12.45650196	11.7398243	A0A2R8YF57;H7C562;H7C577;O00400	SLC33A1
12.18930626	12.30658817	13.38286495	13.35489655	13.32753372	8.897387505	11.40871334	12.99833679	13.25171089	13.26809597	A0A2R8YF87;F5H6Y0;H3BMM5;Q96AX1	VPS33A;VPS33A;;VPS33A
15.04285145	15.27826786	15.13803005	15.15098476	15.10731506	15.33511448	15.10311127	15.30035782	15.29582596	15.25887871	A0A2R8YFA9;O94851	MICAL2
16.36390877	16.4272728	16.52107048	16.50566292	16.63259315	16.4858532	16.34940338	16.46575928	16.59905052	16.49027061	A0A2R8YFH5;Q15437	SEC23B
14.08810806	13.99948025	13.96851635	13.5764122	13.68665981	13.75449848	13.96445656	13.95793533	13.7413168	13.78235817	A0A2R8YFV2;A0A669KAV7;A0A669KBG4;A0A669KBH9;B9EGQ5;M0QXA7;O95785	WIZ
15.66439056	14.57369137	15.26575375	14.83056545	14.60015011	15.22659874	15.00967407	14.93697071	14.57135868	15.33178043	A0A2R8YG42;B1ALK7	ARHGEF7
15.72413921	15.526474	15.52376366	15.57807064	15.66532612	15.18706036	15.16493034	15.37003803	15.60009956	15.55119324	A0A2R8YGD1;O14773	TPP1
13.77745724	13.48633385	14.12520599	14.11034966	14.30289745	13.81258869	13.75055599	13.81643772	14.35992527	13.93944073	A0A2R8YGH5;H7C1E4;P61966	AP1S1
13.80661488	13.89100075	13.80575752	13.84802055	13.79111767	13.86154842	13.94304466	13.49361706	13.98874187	13.91182709	A0A2R8YHD2	TPM4
14.16333389	14.47862148	14.3362093	14.0704689	14.48436737	15.21607494	14.90826511	14.20012569	14.19594383	14.32727909	A0A2U3TZH3;Q05639	EEF1A2
16.99012375	17.03813744	16.50436974	16.95355988	16.29542351	17.20182419	17.14174461	16.59418869	12.78695011	16.62916565	A0A2U3TZL5;E9PNW4;P13987	CD59;;CD59
14.13177109	14.11828423	14.44867897	14.19484234	14.48761463	14.26084328	14.40065861	14.51548481	14.75617027	14.31225586	A0A2U3TZL8;A0A7I2V5Y5;H7BYN4;Q02241	KIF23
15.63872814	15.51975155	15.48569202	15.40912533	15.74091244	15.57795525	15.2670784	15.58056355	15.63908958	15.57774162	A0A2U3TZY2;Q9H078	CLPB
12.08117008	11.31058979	12.92341423	10.45599651	11.91609859	12.42428398	12.88247585	10.36839581	10.96332645	11.29350948	A0A2U3U034;P15848	ARSB
13.15296173	13.04561234	12.81561089	12.35531998	13.02291393	11.88967514	11.88108921	12.67620373	12.84549141	12.76150036	A0A2U3U043;E9PJJ5;E9PK99;E9PMS5;E9PRT1;J3KSG1;J3QRK1;Q4G0X4;Q719H9	KCTD1;KCTD21;KCTD21;KCTD21;KCTD21;KCTD1;KCTD1;KCTD21;KCTD1
15.08486652	14.65613079	14.96381855	14.76823997	15.07850075	14.45535946	14.61538887	14.67896652	14.83430195	14.50874233	A0A2Y9D025;P56556	NDUFA6
14.77783108	15.17814827	14.61949253	14.57132721	14.12851524	14.60945415	14.57746792	14.58159542	14.05581188	14.64272404	A0A384DVL6;C9J0Q5;C9J7T7;C9JE98;Q9Y618	NCOR2
14.71703911	14.61385441	14.72390652	14.67215729	14.52979851	14.60431957	14.49750233	14.73470592	14.44356728	14.52030277	A0A384DVU0;Q8IY17	PNPLA6
14.63035107	14.28324413	14.13417244	14.1849966	14.30497074	14.17107296	14.22167778	14.08493614	14.03642559	14.18540764	A0A3B3IRE4;Q6NSW5;Q8TCE6	DENND10;DENND10P1;DENND10
15.84403419	15.69766331	15.94870567	15.94960022	15.94560528	15.73876762	15.60852718	15.83893013	15.94946957	15.89432049	A0A3B3IRI2;P17812	CTPS1
16.15475082	15.95624447	15.9090519	15.85719681	16.08422661	14.63661766	14.9277668	15.89565086	15.86419678	16.00383759	A0A3B3IRL2;O75629	CREG1
13.71547604	13.8725481	13.07526875	13.26754665	13.35137177	12.72946644	12.85717106	13.24044704	13.39093399	13.38615322	A0A3B3IRR1;A0A3F2YNY7;F5H345;P08397	HMBS
14.55723095	14.41478157	14.22656155	14.07293415	14.08669662	14.06861496	14.36719513	14.1317091	14.19630241	14.13687801	A0A3B3IRT3;O60343	TBC1D4
16.97480774	16.86749649	17.25082397	17.34854126	17.30284119	17.33475685	17.16813087	17.27070427	17.84601593	17.34446526	A0A3B3IRT8;C9IZQ1;C9J3L8;C9J5W0;E9PAL7;P43307	SSR1
14.45009804	14.7215414	14.50037289	14.97725201	14.57061863	14.72199345	14.4559145	14.84383678	14.87407494	14.81985092	A0A3B3IS71;P06400	RB1
11.04223537	9.432688713	11.13293839	11.21587658	11.32614803	10.30156898	10.67996502	11.2149086	11.59231377	11.23162556	A0A3B3IS90;A0A7P0T8Y4;Q2TAA5	ALG11
13.25289249	13.71993828	14.48563957	13.08844566	14.2141428	13.68018055	13.49655628	14.12170601	14.34224892	13.9809103	A0A3B3ISD2;Q13042	CDC16
12.00984097	12.31560802	11.95219898	11.5974884	12.10504055	10.91107464	11.90459633	11.58687019	11.38474369	12.1459341	A0A3B3ISF0;Q659C4	LARP1B
15.1091423	15.37702847	15.28190899	15.29518414	15.30162048	15.30279446	14.89700985	15.49287701	15.25116444	15.29704571	A0A3B3ISF9	ECE1
14.50292683	14.27034092	14.78776073	14.73785114	14.93938828	14.53581238	14.45783806	14.56400108	14.83449268	14.8010788	A0A3B3ISG5;A0A7I2V2P6;P14735	IDE
12.49157619	12.85250854	12.74254513	12.10726261	12.68879223	12.91441631	13.1554327	12.82646465	12.83539295	12.79331589	A0A3B3ISJ3;Q9H8G2	CAAP1
14.65108109	14.66003704	14.59797287	14.58795643	14.70097542	14.6482935	14.44847775	14.61567879	14.61464787	14.56136131	A0A3B3ISK7;Q6PI48	DARS2
11.44195938	9.454482079	12.06320858	11.70580196	7.164213657	7.993957043	8.289803505	7.608752728	12.76815605	11.11531258	A0A3B3ISP1;Q92625	ANKS1A
13.85088158	13.47264481	12.03992271	13.43293095	11.81841183	14.85391235	14.22918987	13.27495193	12.36397552	12.68765831	A0A3B3ISV3;P02462	COL4A1
13.87141991	13.76264763	13.81533241	13.87213707	13.85506153	14.26537991	14.04600143	13.978055	13.91211224	13.87177086	A0A3B3ISV4;Q8N0U8	VKORC1L1
13.35944557	13.53508759	13.6691227	13.56571579	13.26392365	14.09341621	13.83378029	13.89245319	13.2765007	13.52352238	A0A3B3ISV5;H3BSW0;Q8N9N7	;LRRC57;LRRC57
9.648801804	10.72825718	9.334226608	10.03165436	10.03185081	9.045664787	9.187675476	9.574995995	10.52778244	10.05076981	A0A3B3IT46;E5RGX6;E5RH29;E5RIF0;E5RJK3;Q96LB3	IFT74
13.56915283	12.94048786	13.27156925	12.14330101	13.09695721	12.42768192	12.63223743	12.36494446	12.14570904	13.04717636	A0A3B3IT47;Q9Y2I8	WDR37
13.01062107	13.25968742	13.0117588	13.2930212	13.0585556	13.04440308	12.5301342	12.73985767	12.63047504	12.64043522	A0A3B3ITC2;Q13884	SNTB1
13.01872921	12.97060776	13.2110033	12.96784687	13.25356388	13.00041485	12.8465023	13.16867352	13.36535072	13.15548611	A0A3B3ITD0;E9PC15;Q53H12	AGK
15.48690605	15.31917286	15.41868687	15.96840477	15.56427574	15.34103107	15.21671772	15.57418633	11.05136204	14.93431664	A0A3B3ITH3;J3KT25;J3QRS6;Q9P2X3	IMPACT
13.21077251	13.66797447	12.98023701	12.28601742	12.40158176	13.5632515	12.79615688	13.62996483	12.59380054	13.13739777	A0A3B3ITJ4	HNRNPL
12.8011837	13.47566509	10.51876926	13.0109663	12.58842945	10.19687939	11.74267864	10.70708656	12.55766964	11.91950417	A0A3B3ITP9;A0A3B3IU60;Q9Y287	ITM2B
12.61741352	12.67953873	13.11753941	12.81377792	12.77063847	12.52680683	11.92375088	12.62647247	13.30953884	12.68442345	A0A3B3ITR6;O95363	FARS2
13.97851849	14.29025555	13.75502586	13.87857437	13.85736465	14.20046616	14.15803528	14.18403244	13.88296318	14.08361626	A0A3B3ITT1;Q6IQ22	RAB12
19.69651794	19.7553196	19.15308762	19.05052757	19.28243637	19.30129433	19.57335854	19.27711678	18.8700161	19.02942467	A0A3B3ITT5;P47914	RPL29
14.27575684	14.72633743	14.19869423	14.24818993	14.39899063	14.46499538	14.51156712	14.35761929	14.39636898	14.26924133	A0A3B3ITW1;A0A7I2YQK0;P49841	GSK3B
15.3979063	14.93797112	15.6812048	15.45705414	15.62084103	15.50743484	15.09281254	15.54228687	15.8839922	15.48261547	A0A3B3ITW3;P28288	ABCD3
16.90953827	17.1048851	17.06032944	16.98373222	16.91239548	17.01331139	16.82116127	17.04352379	16.95088959	16.80867958	A0A3B3ITZ9;Q9Y2W1	THRAP3
10.49092197	11.55481243	11.13754654	11.20024681	11.52497959	11.14008331	11.48448753	10.77229691	11.71472168	10.82909298	A0A3B3IU33;H3BSD5;H3BSV9;H3BT49;H3BTZ6;Q9Y303	AMDHD2
14.84292984	15.63459778	14.12224483	11.28350163	14.03629684	14.0688343	13.93817329	14.29938602	12.96988773	13.04902077	A0A3B3IU42;H0YDP6;H0YEL0;O14893	GEMIN2
17.02220345	17.08995438	17.09365273	16.9948597	16.98574638	17.02721024	16.89575195	17.05644798	16.95607948	17.04006386	A0A3B3IU45;P33991	MCM4
10.4539423	15.24096584	14.84158516	14.37668705	12.16106224	10.54002857	10.83492279	12.4196825	14.82973099	10.5299387	A0A3B3IU69;F8W717;G3V3N9;G3V500;O00423	EML1
15.31511211	15.316329	15.40761375	15.16173935	15.14297867	15.038167	15.58341885	15.25590134	15.55760098	15.39173126	A0A3B3IUB1;Q13144	EIF2B5
15.4930706	15.30912018	15.58065987	15.64622402	15.68989944	15.758955	15.55889511	15.74371052	15.71965694	15.66318417	A0A3B3IUB5;Q8TCT9	HM13
14.22348404	14.10464287	14.12207699	13.84904194	13.90915489	13.98027134	13.92126751	14.0265522	13.8964777	13.88176346	A0A3B3IUC4;A0A6Q8PFA9;A0A6Q8PHD1;P06280	GLA
14.81042957	14.61929989	14.84395123	14.8453207	14.82693863	14.54422379	14.82888603	14.61463165	14.77658367	14.7085638	A0A3B3IUD2;Q9BUK6	MSTO1
15.06230545	15.1846323	15.22720242	15.05543041	15.11923122	15.14365673	15.24301434	15.29185295	15.22333813	15.13739681	A0A3B3IUD7;Q14690	PDCD11
12.50124264	12.15996075	12.38943768	11.48042488	11.57776356	11.4974699	11.70941257	11.88901138	12.08851814	12.34115982	A0A3F2YNW7;A0A6Q8NVI4;Q8NFD5	ARID1B
15.36216068	15.46382332	14.86702824	14.86639214	15.12075901	14.7921381	14.74598598	14.64324474	14.30974197	14.81911945	A0A494BYR6;Q86Y91	KIF18B
14.26343822	14.8799963	14.11176968	14.50436401	14.01461697	14.6643095	14.44218826	14.7807436	14.05147552	14.64908123	A0A494BZT8;Q9Y6A5	TACC3
15.91679859	15.99161053	15.78330898	15.64152622	15.80738831	15.85307121	15.80350304	15.95407581	15.75554276	15.81484127	A0A494BZV2	MPRIP
18.87817192	18.83037949	18.97923851	18.81663513	18.92853355	18.87869263	18.81159782	18.83380699	19.10219383	18.84494019	A0A494C028;P35659	DEK
12.45471096	13.15739441	13.11392879	12.43911839	12.45340919	12.78264713	12.97667599	12.42559719	12.37235165	12.91284847	A0A494C070;A0A494C0Z6;A0A494C1G8;H0Y6K5;H0Y7L6;Q02447	SP3
15.57655907	15.48713493	15.21872139	15.23772335	15.40872765	14.84077549	15.07272911	15.0252676	14.92330074	15.1827898	A0A494C085;P06132	UROD
15.49414635	15.22474861	15.61059189	15.54190636	15.45485783	15.60601902	15.44234085	15.43822098	15.57475281	15.25129223	A0A494C0B4;P54725	RAD23A
17.03627205	17.11653709	16.98896027	17.00345993	17.0940094	16.84058762	16.67313385	17.32730675	17.19007874	17.06024742	A0A494C0F3;C9J719;C9JJ78;Q15125	;EBP;EBP;EBP
14.28237629	13.90337563	13.81853962	12.98022652	14.01481438	13.17488384	13.47684765	13.36621571	13.59899521	13.28727055	A0A494C0G5	AGRN
13.01225948	12.80427456	12.78419971	12.61685467	12.61586666	12.63372231	12.84309196	12.89705563	12.6811018	12.83227253	A0A494C0K5;A0A494C0W0;O95453	PARN
12.50683117	12.71502018	12.39777565	12.16326904	12.36074162	12.30996609	12.49220276	12.16424179	12.38973522	12.35654831	A0A494C0L7;F5H2X7;H0Y5D5;Q5SYW2;Q9BTG3;Q9ULV3	CIZ1
16.34009361	16.12083626	16.39896393	16.37588501	16.4124012	16.29617691	16.4519577	16.41363907	16.58905411	16.43603516	A0A494C0R8	CLUH
14.09997559	14.2351017	13.490098	13.4274168	13.66716957	13.72526741	14.03020096	13.52753448	13.39385414	13.74993801	A0A494C0V9;B8ZZ87;Q6NZ67	MZT2B
11.00835419	10.72348976	11.08790207	11.51568508	11.62308025	10.93366718	11.98581028	11.66893673	11.4675703	11.54221058	A0A494C0W5;Q86WV6	STING1
18.71826363	18.91518593	19.07717896	19.55426025	18.82144928	19.2519207	18.82303238	19.08114815	19.1477375	19.22311211	A0A494C0Z5;Q9H082	RAB33B
15.43637371	15.31306839	15.23742008	15.0504179	15.18266296	15.14833736	15.26805782	15.09716606	15.26622772	15.15256977	A0A494C108;Q8N9T8	KRI1
12.80545521	12.42778969	12.71415615	12.28066444	12.7116394	12.20608234	12.6724205	12.27560329	12.81644821	12.07904434	A0A494C143;Q14689	DIP2A
13.01840591	12.85921001	13.27695751	13.12579632	13.38473415	11.18927002	11.27638626	12.78286362	13.08324432	12.66062069	A0A494C146;P50336	PPOX
18.08954811	18.2727623	17.22070313	16.57969856	17.06352043	17.34775352	17.85221481	17.77450752	16.51271057	16.99340248	A0A494C160;P14854	COX6B1
12.08248329	12.17143536	12.46239376	11.20174122	12.15882778	12.10308266	11.96305561	12.35903072	11.98016262	11.32363605	A0A494C164;P52630	STAT2
14.75351238	14.64771748	14.9269371	14.94009686	14.93384933	14.73963451	14.73246193	14.60498142	15.15908623	14.86679268	A0A494C165;P12955	PEPD
14.67216206	14.73081303	14.91091061	14.78353214	14.94131565	14.75939655	14.75092316	14.76218224	14.95811272	14.78521729	A0A494C1B8;P29144	TPP2
13.91390896	13.98324299	13.95274448	13.4778223	13.96370029	13.97768593	13.64326572	13.84226418	13.82584858	13.68426323	A0A494C1E0;A0A499FJL2;E9PHM2;Q15031	LARS2
16.56581116	16.66458702	16.31180763	16.27983093	16.3999424	16.58793831	16.55288887	16.6065197	16.34671021	16.48931313	A0A494C1F2;P35658	NUP214
14.24651146	14.22210217	14.09656143	13.79218674	13.70626736	13.94991684	14.16160393	14.02421951	14.05467224	13.95151997	A0A494C1J1;F8WAN1;Q69YQ0	SPECC1L;SPECC1L-ADORA2A;SPECC1L
13.43146706	13.55944443	13.30738258	12.96497059	13.39245796	13.1410265	13.28214073	13.38556385	13.15807152	13.185359	A0A494C1L5;E9PEM5;P50851	LRBA
16.43346977	16.46478653	16.12527657	16.20122528	16.32030106	16.25461769	16.11362457	16.22764778	16.26296234	16.25883293	A0A494C1N0;P26885	FKBP2
12.58946705	12.90247059	12.64853764	12.85534573	12.68989944	12.62588978	12.98193169	12.91891861	13.19957542	12.77909279	A0A494C1S7;Q9Y5Q9	GTF3C3
16.0729084	16.0760479	16.0933342	16.0376339	15.98422337	16.01332283	15.88798237	16.02902031	16.05142403	15.95297909	A0A499FI31;Q15020	SART3
17.57258987	17.55908966	17.78743172	17.72133636	17.78183365	17.81304932	17.58429527	17.67930984	17.95651436	17.54370499	A0A499FIY8;C9JC07;C9JZL8;Q96S97	MYADM
13.75617695	13.91648006	13.62257099	13.56459618	13.73405266	13.78544044	13.7606926	13.83983135	13.72379684	13.86138725	A0A499FIZ0	WDR26
12.64947414	12.27764893	12.29631901	12.24221516	12.13671684	11.88615704	11.57312393	12.05759811	12.16910172	11.95011616	A0A499FJS7;O14920	IKBKB
14.29484272	14.37661934	13.75617027	14.11022568	14.10887146	13.63963032	13.70411873	14.16204548	13.86330891	14.20932865	A0A590UJ73;A0A590UJW4;E7EQB3;Q9BSV6	TSEN34
14.56976128	14.59315681	14.2354126	14.08259678	14.11265182	14.3279295	14.31354427	14.6547966	14.33586121	14.3218441	A0A590UJA9;C9JCW7;C9JE12;Q9BVT8	TMUB1
12.1037426	12.06838036	12.7467165	12.74334049	12.71547604	11.45211029	11.69642925	12.82502079	11.94156361	12.32808208	A0A590UJI5;A0A5K1VW61;A0A5K1VW71;A0A5K1VW79;A0A5K1VW93;B7ZLQ8;E5RFP2;E5RJM0;H0Y9D9;Q17RY0;Q7Z5Q1;Q8NE35	CPEB4;CPEB2;CPEB2;CPEB2;CPEB2;CPEB4;CPEB4;CPEB4;CPEB2;CPEB4;CPEB2;CPEB3
17.80140495	18.13076973	17.85975456	17.7923317	17.75563431	18.00024414	17.89669991	18.10800362	18.04201698	17.83021736	A0A590UJK4;A0A590UJP7;A0A590UK01;A0A590UK80;Q13247	SRSF6;SRSF6;SRSF6;;SRSF6
12.02246094	12.01175213	12.16819477	11.97330666	11.73544693	10.39630222	11.33205318	11.24573517	11.68309879	12.19674969	A0A590UJN8;A0A590UJW0;P20585	MSH3
14.1800642	14.0906105	14.06897163	13.67173481	13.91148853	13.93544769	13.61327839	14.21440125	13.96723652	13.88606739	A0A590UJS4;Q6KC79	NIPBL
15.07928848	14.82042885	14.93467712	14.79805374	14.97343063	14.62854004	14.83732224	14.77911663	14.80462265	14.73804855	A0A590UK44;Q96J02	ITCH
14.82822323	14.65674686	14.70296764	14.85034275	14.91559792	14.59826565	14.76566601	14.79437447	14.5986433	14.69589806	A0A5F9UK94;H0Y360;Q01433	AMPD2
14.69493771	15.00985241	14.94196129	14.91795635	14.63668537	14.86131763	14.50889683	15.11879444	14.88367367	14.90300655	A0A5F9UP49;Q9BRK5	SDF4
11.84565544	12.02604294	12.90005875	12.87301922	12.612957	12.72388172	12.4979887	12.54593658	13.42302132	13.02226543	A0A5F9UY30;A0A5H1ZRP2;O43493	TGOLN2
15.33923912	15.21286011	15.50595474	15.51915836	15.35056496	15.19234371	15.2677784	15.33497429	15.32219791	15.46113396	A0A5F9W493	CSNK1A1
14.60506344	14.51714802	14.69818878	14.68992805	14.65059662	14.75136185	14.32636166	14.8151865	14.59632111	14.75950432	A0A5F9YFS9	SPCS1
13.88920593	13.84776115	14.64733601	14.38330555	14.40328026	14.25885391	13.86631393	14.64347649	14.78416729	14.63462543	A0A5F9ZGX4;A0A5F9ZHI5;A0A5F9ZHN9;A0A5F9ZI12;J3QRD1;P51648	ALDH3A2
14.45116615	14.57263374	14.3770647	14.34246063	14.41058636	14.7187767	14.32038021	14.49895191	14.6209774	14.30343723	A0A5F9ZH07;A0A5F9ZHN8;A0A5F9ZHW0;A0A5F9ZI39;P23458	JAK1
14.77157402	14.53342915	14.54085732	14.11993313	14.12774658	13.6730175	13.54115105	14.07577324	14.39959717	14.43287945	A0A5F9ZH40;A0A5F9ZH82;A0A5F9ZHR7;A0A5F9ZI20;B7Z6U3;E9PHY0;P11117	ACP2
15.99526119	15.39196968	15.70607185	15.9666214	16.11606216	15.71201038	15.93930531	16.25763512	16.42904472	15.75838757	A0A5F9ZH79;A0A5F9ZHP1	ASCC1
14.11071777	13.49280834	13.97259235	13.71510315	13.83792496	13.5225296	12.14718437	13.43797016	13.43715382	13.44466877	A0A5F9ZHB6;P49642	PRIM1
15.93386555	15.97784042	16.18979645	16.06827354	16.10603714	16.17644691	16.0353775	16.11428833	16.18852043	15.9924221	A0A5F9ZHN7;Q9NTJ5	SACM1L
11.52057266	11.85873508	12.39774895	12.05115128	12.08605957	11.86784172	11.87115669	12.01664925	12.43274689	11.95277977	A0A5F9ZHS3;E7EN32;O00255	MEN1
14.05295563	13.91019058	13.46085548	13.51076984	13.68330097	14.30635548	14.29661942	13.58387756	13.73745346	13.38816833	A0A5F9ZHU7;P49643	PRIM2
13.88261414	13.81371212	14.5887661	14.21360683	14.36763382	14.88276863	14.09016705	14.83052635	14.58165741	14.46689987	A0A5F9ZHY7;Q8WY22	BRI3BP
16.27531815	16.33956528	16.04037285	16.0897007	16.16672134	16.19568062	16.13444328	16.07697296	16.08208656	16.12109375	A0A5F9ZI21;Q92974;V9GYM8	ARHGEF2
13.63460064	13.43665218	13.10046005	11.99235058	12.86743832	12.68446445	12.79936886	13.29389858	12.7194252	12.20965862	A0A5H1ZRP4	NELFB
11.65868664	11.09988785	10.76984787	9.5564394	10.77306557	11.19980526	10.52824879	10.89162254	9.224379539	11.04771233	A0A5H1ZRQ3;P01834	IGKC
14.24127293	14.64893055	14.16548729	14.02326679	14.11300945	14.23927116	14.29055595	14.44211864	14.1603632	14.3020277	A0A5H1ZRS1	PCM1
14.68511581	15.13456631	14.86270618	15.09664726	14.57795906	14.86122608	14.41521645	14.98858261	14.51029396	14.88241959	A0A669KAX3;O76024	WFS1
15.46756172	15.33610344	15.63814068	15.54519749	15.56413555	15.28343487	15.21880531	15.42914295	15.67294693	15.43033886	A0A669KAX4;A0A7P0T954;K4DI93;Q13620	CUL4B
14.49701786	14.62086391	14.54235744	14.51614285	14.74880791	14.44710159	14.57782269	14.74577808	14.73610592	14.85506916	A0A669KB10;A0A669KBG8;A0A7I2V2L5;A0A7I2V452;A0A7I2YQ65;A0A7I2YQM2;A0A7P0RGV0;Q92538	GBF1
13.73961544	13.58573723	13.2896862	11.94379044	12.93203831	12.81219196	12.38783264	13.56254482	12.70765877	12.89038467	A0A669KB12;Q09472	EP300
14.08092594	13.49075699	13.62978172	13.96934986	13.58927536	13.9346962	13.46640968	13.92350197	14.03358459	13.84718323	A0A669KB27;A0A669KBH7;Q9UHQ4	DUS4L-BCAP29;DUS4L-BCAP29;BCAP29
16.6688385	16.56034851	16.8499794	16.70977402	16.93117905	16.78641891	16.67119026	16.60974884	16.91329575	16.78948975	A0A669KB53;A0A669KB56;A0A669KB68;A0A669KBA4;P42224	STAT1
15.42218971	15.50270176	15.31545639	14.97044659	15.22857952	15.70940399	15.62048054	15.10781574	14.92602158	15.22025681	A0A669KB62	CTNND1
11.36231899	11.91658211	11.74586868	10.66064548	11.47392273	11.66221237	10.17816257	11.45272732	11.58620453	10.51042652	A0A669KBH4;Q14999	CUL7
15.47090054	15.26832771	15.22313786	14.99186039	15.21868134	15.22169399	15.26549816	15.14811611	15.26464748	15.18549252	A0A669KBJ7;Q9H2P0	ADNP
15.36093426	15.51217747	15.6373539	15.51702881	15.49523735	15.52367687	15.16665268	15.70824432	15.48116207	15.59318733	A0A669KBL1;Q93009	USP7
13.88153172	14.3412323	13.83261585	13.54330921	13.82676983	14.20991516	13.86933231	14.03793621	13.55203629	13.87794209	A0A6E1XQM6;F2Z2S2;O94915	FRYL
17.34734726	17.16682243	17.4046669	17.38373566	17.4383049	17.22353554	17.20870018	17.32962227	17.37528801	17.28839684	A0A6I8PIV1;A0A6I8PL42;B4DER1;Q9P2J5	LARS1
10.93939018	10.5969553	8.820333481	10.13234425	12.81290722	10.46179295	10.50169945	10.84686852	9.648256302	11.38016319	A0A6I8PIW1;O43301	HSPA12A
14.12438869	14.26339626	14.10982609	13.92626286	14.10676289	14.14317226	14.12011814	14.16792202	14.18309498	13.99182415	A0A6I8PIX7;O95425	SVIL
14.79511261	14.83233452	14.76440048	14.43718243	14.57854462	15.19800568	15.21560955	14.84387207	14.78712368	14.49805737	A0A6I8PL80;A0A6I8PS19;Q9NVN8	GNL3L
16.86602592	16.83319283	16.87070847	16.78245354	16.86170769	16.78499794	16.92084885	16.72307587	16.85177422	16.81828308	A0A6I8PS32;A0A6I8PUD4;Q99615	DNAJC7
14.7853241	14.57089138	14.63854694	14.28106308	14.62005329	14.49423981	14.52804852	14.68468285	14.57631493	14.5270195	A0A6Q8KRG2;Q08379	GOLGA2
13.29036522	12.84809875	12.79833794	12.15997982	12.91281319	12.63362122	13.24695683	12.1443758	12.81876183	12.21990395	A0A6Q8PEV5;A0A6Q8PF12;A0A6Q8PFB1;A0A6Q8PFB5;A0A6Q8PGR4;A0A6Q8PGX0;A0A6Q8PH03;A0A7I2PK71;A0A7I2SYM4;Q9BYV8	CEP41
13.66259956	13.66931629	14.29901218	14.10953522	14.22723961	14.0136919	13.95824051	13.99038506	14.27571774	14.13490486	A0A6Q8PEX6;A0A6Q8PFB7;A0A6Q8PG86;A0A6Q8PGW3;A0A6Q8PHF4;O95163	ELP1
12.69757748	12.9645586	12.46078014	12.06432533	12.64789963	12.54754543	12.71614361	12.61972618	12.38461494	12.72865391	A0A6Q8PEY3;A0A6Q8PGV6;I3L3G9;I3L522;Q9NXR1	NDE1
11.80550766	10.52636909	12.4854784	11.73524666	12.24771786	13.0183363	12.19396782	11.26081467	13.75460148	11.40810871	A0A6Q8PEZ3;A0A6Q8PFC0;A0A6Q8PFE6;A0A6Q8PH43;A0A7I2RVZ4;B4DI28;Q9UKA9	PTBP2
12.89597893	12.90168285	13.21066284	13.21638584	13.29391766	13.2009182	13.13359833	13.44652367	13.85581112	13.55146027	A0A6Q8PEZ7;A0A6Q8PFF7;A0A6Q8PG30;A0A6Q8PG75;A0A6Q8PGA4;A0A6Q8PHQ1;Q96S66	CLCC1
15.60155678	15.75969505	15.08542347	15.14766693	15.11940575	15.29585075	15.40605736	15.44347668	15.40688992	15.44401646	A0A6Q8PF35;A0A6Q8PG85;F5H875;F8VUA2;Q9HD42	CHMP1A
14.99124146	15.1036768	15.22434521	15.23976803	15.18765068	15.13880444	15.09156132	15.08598614	15.28839302	15.13657856	A0A6Q8PFA6;A0A6Q8PH57	KIF2A
12.86763954	13.80587482	13.79459095	14.0662775	14.06554985	12.65087032	12.4970932	14.16766644	13.82117176	13.89391613	A0A6Q8PFE0;A0A6Q8PFV8;A0A6Q8PFW8;H7C5J5;Q9HAV0	GNB4
17.65731621	17.55982399	17.57292557	17.46793747	17.60438347	17.64163399	17.57363701	17.534832	17.55928421	17.47801208	A0A6Q8PFE1;A0A6Q8PFM5;A0A6Q8PG15;A0A7I2PK44;O95831	AIFM1
14.40456295	14.4531002	12.9129982	12.71971321	13.31477928	13.42953205	14.07416534	13.40110302	12.18037701	13.20508957	A0A6Q8PFE4	ACTB
14.31912231	14.58604431	14.33670235	14.4005003	13.89850426	14.27580357	13.40302372	14.36692524	13.59396172	13.96156025	A0A6Q8PFG8;A0A6Q8PFH3;Q9H5K3	POMK
17.09428215	17.0288868	17.13232613	17.09203339	17.14315414	16.99445343	17.12804604	17.28024483	17.19641495	17.30687332	A0A6Q8PFI7;A0A6Q8PGP5;A0A6Q8PHJ5;Q96PU5	NEDD4L
21.75210762	21.75024414	21.72859001	21.67152596	21.71709824	21.77379227	21.67295647	21.7366581	21.66179085	21.67273712	A0A6Q8PFJ0;P02545	LMNA
13.35528088	13.50384998	13.76962948	13.9450407	13.60078335	13.76214695	13.51164818	14.04066086	14.09531784	14.00752544	A0A6Q8PFJ4;A0A6Q8PGS9;A0A6Q8PGV8;O95140	MFN2
15.80171394	15.76017666	16.0341053	15.87038136	16.03014374	15.7798357	15.68133926	15.57910633	16.13565063	15.80032635	A0A6Q8PFU3;P43034	PAFAH1B1
16.60405731	16.59042549	16.54581642	16.48269844	16.58835983	16.62801933	16.61419296	16.43663979	16.55636024	16.55785942	A0A6Q8PFY2;A0A6Q8PGN5;P49588	AARS1
9.417308807	9.876285553	9.703471184	10.2457056	10.47301102	11.28485298	11.09694099	10.6121769	10.69960308	10.38648701	A0A6Q8PFY3;Q9BXW9	FANCD2
17.71476173	17.65665627	17.66524696	17.76831818	17.82903671	17.74921036	17.81242371	17.63112068	17.83719063	17.76368332	A0A6Q8PFY7;Q92734	TFG
15.52562904	15.65753269	15.44993973	15.36514759	15.49934101	15.51429081	15.40842247	15.51891518	15.32758141	15.43121147	A0A6Q8PGB0;P24928	POLR2A
15.9289875	15.99277496	15.92381859	15.95674324	15.84994411	15.96312046	16.08947182	16.03678131	15.88589764	16.02570915	A0A6Q8PGN3;A0A6Q8PH71;A0A6Q8PHA2;A0A6Q8PHG2;Q27J81	INF2
14.72173405	14.66140366	13.48941612	13.96369267	14.00462914	13.94937611	13.74827957	14.27597618	14.25803185	13.56155777	A0A6Q8PGS5;C9JEX3	MTMR2
13.43748093	13.36287498	13.21442795	12.82887077	13.15037155	12.95090675	13.16857719	13.14942646	13.00700665	12.86437511	A0A6Q8PGU6;Q8NB90	SPATA5
12.83062935	12.63087082	13.39559937	13.30813408	13.46370792	13.2110548	13.00533676	13.15399075	13.57865524	12.93255615	A0A6Q8PH21;B3KXX3;I3L4N6;Q9UHW9;Q9UP95	SLC12A6;SLC12A6;SLC12A4;SLC12A6;SLC12A4
17.11083603	17.04022789	17.44210434	17.42242622	17.44911957	17.33013153	17.30287361	17.33648491	17.63516998	17.45599556	A0A6Q8PHA5;P12081;SYH_HUMAN	HARS1;HARS1;
12.42883682	12.59325981	12.22706509	11.08758831	11.54218769	11.51418877	11.43643284	12.14073467	11.08006382	10.95781231	A0A6Q8PHH2;O95251	KAT7
14.22671986	14.24717236	14.21131706	14.00744247	14.15793037	14.16401768	14.38807011	14.32410812	14.35757732	14.28861237	A0A6Q8PHK0	TRIP12
14.97305965	14.75954437	15.16952229	15.06524372	15.17263603	14.81553555	14.86112499	14.96625233	15.07739925	14.9400692	A0A6Q8PHP0;P49902	NT5C2
13.35502434	13.3823595	13.45328522	13.25136375	13.35203362	13.29230118	12.85580635	13.54487514	13.18763161	13.18114471	A0A7I2V2B0;Q92581	SLC9A6
16.83683395	16.74358368	16.69633102	16.7302475	16.76534653	16.5198288	16.45369911	16.7491684	16.7775383	16.78841591	A0A7I2V2D8;A0A7I2V2K2;A0A7I2V2R9;A0A7I2V2W5;A0A7I2V307;A0A7I2V3F9;A0A7I2V3I8;A0A7I2V3J3;A0A7I2V5A2;A0A7I2V5A3;O14964	HGS
12.74031258	12.6641283	12.82289982	12.04011631	12.83531761	11.90968704	12.81352234	12.76652622	12.59381962	12.53714466	A0A7I2V2E3;A0A7I2V2N8;A0A7I2V2U9;A0A7I2V3B9;A0A7I2V3I9;A0A7I2V409;A0A7I2V4G7;A0A7I2V4K8;A0A7I2V4T2;A0A7I2V5G3;A0A7I2V639;A0A7I2YQF7;H0YJI9;H0YKP9;J3KNR0;P27448	MARK3
14.39918423	14.41821384	14.34037399	13.94669914	14.29055977	14.36167717	14.34668636	14.37944031	14.11736393	14.45345211	A0A7I2V2F4;A0A7I2V4W4;A0A7I2V646;Q9UHD2	TBK1
19.82491112	19.94706726	19.54899597	19.6119957	19.47040176	19.64646721	19.68320084	19.70739746	19.47752953	19.56208229	A0A7I2V2F9;E7EUI6;H7C4K3;P05556	ITGB1
16.17881775	16.06157494	16.2326355	16.26684761	16.33633041	16.05237389	16.14344597	16.13327408	16.51304054	16.37133789	A0A7I2V2G1;A0A7I2V395;A0A7I2V3V0;A0A7I2V444;A0A7I2V4C8;A0A7I2V4R2;A0A7I2V4R3;A0A7I2V5N9;A0A7I2YQD2;A0A7I2YQI1;A0A7I2YQR5;P40763	STAT3
21.11381531	21.04580307	20.85744858	20.7437706	20.82305145	20.96742821	21.05720711	20.96439171	20.71259117	20.84937096	A0A7I2V2G2;D6RCD7;P38646	HSPA9
17.90147591	17.75424957	18.09062767	18.03232384	18.08259201	18.00534248	18.08976555	18.02471542	18.20350456	18.06641579	A0A7I2V2H9;A0A7I2V2W0;A0A7I2V3I0;A0A7I2V3S3;P60228	EIF3E
17.83926582	17.65152359	17.73398209	17.80668449	17.80669403	17.31024742	17.71616364	17.57624435	17.8316803	17.72208214	A0A7I2V2K5;A0A7I2V473;E9PAV3;F8VZJ2;H0YHX9;Q13765	NACA
16.99044037	16.83317184	16.96422386	16.992939	16.83716011	16.52595711	16.54845428	16.75586891	16.97954178	16.94464111	A0A7I2V2Q8;A0A7I2V466;A0A7I2V6E3;P53634	CTSC
17.99985886	17.86887741	18.25973129	18.12614441	18.19809341	17.8424015	17.76366615	18.14468765	18.32833672	18.24576187	A0A7I2V2R3;A0A7I2V5D8;P51991	HNRNPA3
11.51091099	13.77137089	13.32622051	13.05874825	13.40636826	9.984920502	10.83584404	18.87182236	10.8031311	11.51232719	A0A7I2V2R5;A0A7I2V2X8;P27487	DPP4
19.06443596	18.9004364	19.04141808	19.02965546	19.09310913	18.98998642	19.15141106	18.96854591	19.09513092	19.11203384	A0A7I2V2T3;H0Y4R1;P12268	IMPDH2
15.91628075	16.061903	15.96609306	15.8733654	16.02627373	16.2675724	16.3166256	16.17637444	16.10582161	16.15430641	A0A7I2V2U2;A0A7I2V4T9;A0A7I2V588;A0A7I2V5Z3;O43765	SGTA
14.7258997	15.38346577	14.26319122	14.1559391	13.9773283	14.57368279	13.5558176	14.49551105	13.90690517	14.2862606	A0A7I2V2U6;P13995	MTHFD2
15.09148788	15.11560535	14.96713352	14.92204952	14.85973454	15.12941265	15.00490475	15.18064976	14.95515156	15.01689816	A0A7I2V2Y9;A0A7I2V5E1;A0A7I2YQD7;A0A7I2YQE9;B7Z2R7	ACBD5
18.81210327	19.00046921	16.97583961	17.22102928	17.29769707	17.51046944	18.04938507	18.12730789	16.4645462	17.27025414	A0A7I2V323;A0A7I2V3P1;A0A7I2V4N1	HNRNPA2B1
19.22344971	19.15205193	19.14562035	19.13559151	19.13529396	19.19511604	19.434618	19.14952278	19.23338699	19.21413994	A0A7I2V351;A0A7I2V487;A0A7I2YQE1;P52292	KPNA2
14.88592625	14.82283497	15.00418282	15.19233036	15.19137383	15.05939293	14.83261681	15.06391907	14.93980789	14.83602524	A0A7I2V370;P21964	COMT
16.01119614	16.04665565	15.95291042	15.8576746	15.95665932	16.01320457	15.94046974	16.055233	15.98779964	15.95016098	A0A7I2V397;A0A7I2V5C6;A0A7I2YQT2;Q5JRX3	PITRM1
14.9881115	15.04689407	15.48528671	15.37953949	15.16319942	15.57070541	15.39665508	15.20521355	15.47967243	15.40658855	A0A7I2V3A1;A0A7I2V3V7;A0A7I2V4L6;O15498	YKT6
15.10407829	15.58547211	14.89850903	15.33781528	14.89260292	15.47658253	14.97045994	15.60130405	14.91750336	15.42237854	A0A7I2V3A9;P52732	KIF11
16.85208893	16.83614349	16.69480133	16.62856293	16.66959953	16.85651398	16.8212719	16.78683662	16.61236382	16.71431732	A0A7I2V3B4;A0A7I2V4B8;A0A7I2V5I2;Q8WVM8	SCFD1
13.50837994	13.51126575	13.95074749	13.38322067	13.89595509	13.5493021	13.12499237	13.19410992	11.5225668	13.40713501	A0A7I2V3F2;H3BMQ2;Q9UHA3	RSL24D1
20.81711006	20.49287796	20.78119278	20.85791397	20.82416344	19.84800339	19.46479416	20.60859108	20.9755764	20.85736084	A0A7I2V3R8;F8W6I7;P09651	HNRNPA1
15.9456625	15.30972385	12.92103195	14.67383766	12.97942352	15.1410799	15.64415646	12.42943192	9.011880875	13.18322849	A0A7I2V3T6;A0A7I2YQL2	BTF3
13.03028393	13.52334881	13.8246336	13.57048798	13.84496021	13.88930511	13.90190792	13.98473072	13.95368004	13.87015629	A0A7I2V3T8;A0A7I2YQA5;Q15904	ATP6AP1
15.5301075	15.394557	15.39284325	15.20183849	15.55753517	15.50991726	15.62757397	15.54658413	15.63350582	15.48486328	A0A7I2V3W3;A0A7I2V4B3;Q13443	ADAM9
13.76649475	13.94224262	13.50730896	12.89101601	13.23396015	13.11297894	13.47200966	13.64061165	13.44743061	13.28351498	A0A7I2V416;A0A7I2V451;A0A7I2V486;A0A7I2YQJ3;A0A7P0TBP2;Q5M775	SPECC1
19.65278053	19.76079178	19.85873985	19.84587669	19.75434685	19.90122986	19.80650139	19.83558273	20.07771873	19.92020226	A0A7I2V428;C9JLB1;P19338	NCL
16.90925217	16.72211266	16.89564323	16.82668877	16.87309074	16.68022919	16.6800766	16.74918747	16.87687302	16.84744263	A0A7I2V430;A0A7I2V4F0;Q92499	DDX1
13.30379295	13.5477581	12.88473034	12.7397089	12.91125107	13.19590473	13.2734623	13.30438805	13.2778511	12.97782135	A0A7I2V434	HNRNPA1
16.56521416	16.74381065	16.49194717	16.47543907	16.40444565	16.34276009	16.11258125	16.33774185	16.79589462	16.67688179	A0A7I2V440;E9PHZ5;P07858	CTSB
17.26482964	17.13224983	17.39272881	17.49214172	17.45957565	17.19411087	17.15077972	17.33233452	17.50265503	17.41639137	A0A7I2V461;O14980	XPO1
17.38209534	17.39203262	17.64773178	17.58507156	17.41867447	17.4331913	17.5858593	17.48923302	17.77520943	17.5017662	A0A7I2V490;A0A7I2V5D0;P26358	DNMT1
11.33598137	12.2686367	11.92313099	12.04582119	12.07590961	11.90057087	12.02309608	12.25042725	12.2637043	12.26498222	A0A7I2V4F4;A0A7I2V4R4;A0A7I2V4V4;A0A7I2V5F3;A0A7P0RGI5;E9PQZ2;Q11206	ST3GAL4
13.51682472	13.77655602	13.41879082	13.35283184	13.41521263	13.81593323	13.81179714	13.64449406	14.32213688	13.29879379	A0A7I2V4I5;Q5T200	ZC3H13
15.8075428	15.70135021	15.64775848	15.55022144	15.64643002	15.78349113	15.46984196	15.64906216	15.82742023	15.68079185	A0A7I2V4J9;G3XAI2;P07942	LAMB1
14.97106266	14.63717365	15.34862709	15.28768921	15.4119854	14.63290977	14.61667728	15.01699352	15.12129974	15.13134956	A0A7I2V4K5;P10619;X6R5C5;X6R8A1	CTSA
17.63631439	17.68091202	17.73257637	17.73531342	17.68893433	17.76233864	17.66564369	17.59579659	17.81222916	17.82195282	A0A7I2V4L7;B1ANR0;Q13310	PABPC4
17.22082329	17.22323036	17.11078644	17.10621452	17.01402855	16.86089897	16.9036541	16.95380592	17.06953621	17.08704376	A0A7I2V539;P30419	NMT1
12.22440624	12.33090591	10.86219311	10.72132015	11.66005898	10.35005951	11.71536064	11.22200871	11.6961174	12.29249382	A0A7I2V544;A0A7I2V5Z5;M0R0L2;Q96D53	COQ8B
16.59698105	16.39972496	16.44350052	16.29683304	16.44013023	16.17581749	16.49186134	16.325243	16.38312912	16.30873299	A0A7I2V597;Q07817;Q5QP56;Q5TE64;Q9H1R6	BCL2L1
14.22257042	14.72503662	14.67322159	14.18512249	8.797182083	13.79620934	12.57406425	14.00979328	14.19142914	14.11043072	A0A7I2V5D2;A0A7I2YQI0;C9J494;Q9H000	MKRN2
15.669137	13.51551819	14.88454628	14.49197006	14.8446722	14.17070866	14.87062645	14.90692711	14.95964718	14.85215855	A0A7I2V5M3;P07711	CTSL
13.57385731	13.36662388	13.33477497	12.52143192	13.23541546	13.41913605	13.79331493	13.31840515	13.46990013	13.37089825	A0A7I2V5Q5;A0A7I2V629;C9JM79;C9JN15;Q13427	PPIG
13.31587601	13.58560562	13.55869961	13.4127636	13.56408787	13.27020454	13.62640762	13.54060745	13.48479652	13.24329185	A0A7I2V5R1;Q8TD19	NEK9
17.53777313	16.97885513	17.55151176	16.91136551	17.52637482	17.07320404	17.4316864	16.95644569	17.49665642	17.00014687	A0A7I2V5T4;A2A274;Q99798	ACO2
12.63119125	11.95664215	12.2112093	11.3191185	12.24337387	12.71281052	12.65375614	11.85681629	12.39965248	11.6051836	A0A7I2V5T6;P04920	SLC4A2
14.95415115	14.61421967	15.234128	15.14863205	15.14621258	15.06773186	14.78849792	15.20218468	15.32641602	15.23955059	A0A7I2V5T7;Q9H7Z7	PTGES2
14.56043339	14.99561691	14.54681587	14.40681553	14.2707119	14.76226139	14.69534588	14.65185738	14.50055981	14.68236732	A0A7I2V5U5;G5E9E7	TJP1
14.2256403	14.14181042	14.11105442	14.1567421	14.05621719	13.91217422	13.91123867	14.25830173	14.01388073	14.13918686	A0A7I2V5X1;Q9NXS2	QPCTL
19.32245255	19.41291618	19.32425499	19.24948502	19.18918037	19.30272293	19.20243835	19.2863102	19.09872246	19.21697998	A0A7I2V5Y7;Q15233	NONO
16.65168381	16.50188828	16.17730713	16.60711288	16.38260078	16.50558662	16.42043495	16.40341949	16.42668533	16.34951401	A0A7I2YQ78;P67870;Q5SRQ6	CSNK2B
15.71777058	15.68566036	15.63995552	15.65011311	15.68443012	15.59517384	15.55088043	15.68638325	15.76569557	15.69999027	A0A7I2YQ95;H7C4F6;O00629	KPNA4
21.03539085	21.20559883	20.39941216	20.48806	20.46386147	20.54419327	20.788908	20.70131493	19.96655655	20.56098175	A0A7I2YQC0;P06748	NPM1
18.28402519	18.08694077	18.04939079	18.09506607	18.09493446	17.96152878	18.1466732	17.94272232	18.09076691	18.02417183	A0A7I2YQF8;A0A7I2YQU2;Q13347	EIF3I
19.10877037	19.22956657	18.85696983	18.79053116	18.84290314	18.84103203	19.08225822	18.8115387	18.74445534	18.74836159	A0A7I2YQG2;J3KTE4;J3QR09;P84098	RPL19
15.49273205	15.36634731	15.4377203	15.31293392	15.50083256	15.41688538	15.54078007	15.16706944	15.33437347	15.30909634	A0A7I2YQI5;Q9Y5P6	GMPPB
16.45155334	16.64317322	16.58651543	16.77958298	16.26015091	16.52990341	16.43281937	16.56322861	16.36683464	16.64170265	A0A7I2YQQ3;Q92820	GGH
13.52964687	13.56122017	13.72770977	13.54209709	13.35500526	13.33343315	13.3484726	13.57732582	13.72518539	13.61875534	A0A7I2YQS5;A0A7P0P278;O96028	NSD2
12.1005106	12.12493229	12.19236946	12.1925993	12.12771225	12.02196598	12.37849426	11.38083458	12.32836437	12.21610451	A0A7I2YQU6;Q9NQA3	WASH6P
16.47498512	16.66851044	16.86068535	16.53490829	16.7865715	16.83279991	16.54983711	16.78537369	16.70362854	16.6101265	A0A7N4I394;O75400	PRPF40A
11.70423031	11.05717754	11.72290707	11.2165823	11.09591198	11.96435165	11.32596207	11.70061016	12.04261971	11.81655693	A0A7N4YH79	TENT4B
16.0718689	15.67431355	16.07157898	15.61935043	15.92907047	15.60131645	15.83319569	15.59417439	16.10412025	15.58044434	A0A7P0MKV3;G5E9W7;P82650	MRPS22
15.13970852	14.79954052	14.18581867	14.60164738	14.65454102	14.77007198	14.97526836	14.29234982	13.98532009	14.19169331	A0A7P0MNE9;P35030	PRSS3
13.98091316	10.81867599	11.25517654	11.64182091	12.2311306	13.66392612	10.42397499	11.71222973	11.61622047	11.05428314	A0A7P0MRI8	PLCB4
12.6267662	13.72963428	12.95212746	13.34129429	12.98810959	13.27600479	13.07625103	13.14970207	12.53405285	13.44163799	A0A7P0T7V2;A0A7P0T8S7;A0A7P0T9J0;A0A7P0T9W6;A0A7P0TAC0;A0A7P0TAC8;A0A7P0TAS0;A0A7P0TAU8;A0A7P0TB73;A0A7P0Z4D0;A0A7P0Z4F1;A0A7P0Z4F5;Q9Y6K5	OAS3
13.18111515	13.51117229	12.66121006	12.49155617	12.77531528	12.82154465	13.110075	12.93575478	11.13590145	12.98098946	A0A7P0T7Z2;A0A7P0TA34;Q9Y6D5	ARFGEF2
15.40325165	15.26995087	15.52290058	15.64547634	15.54888248	15.0102663	15.0063467	15.20424175	15.53292465	15.46250534	A0A7P0T824;A0A7P0T838;A0A7P0T952;A0A7P0T9E5;A0A7P0T9T1;A0A7P0TA16;A0A7P0TA65;A0A7P0TB15;A0A7P0TBE4;H0YJF7;Q99986	VRK1
14.95353985	14.84430408	15.07542133	14.83005142	15.00570869	15.00283718	14.64726639	15.13557625	15.0523653	14.93688297	A0A7P0T850;A0A7P0T901;A0A7P0T9B8;A0A7P0T9X2;A0A7P0TAL2;A0A7P0TB27;A0A7P0Z4I2;B4DR67;Q9Y673	ALG5
20.38478279	20.52399254	20.73060036	20.83162308	20.6766777	20.7257843	20.46129608	20.72835159	20.82704353	20.78265762	A0A7P0T861;K7EL50;P27797	CALR
14.55591393	14.44476891	14.33195782	14.1305542	14.27501202	14.25474548	14.4464922	14.41728973	14.57116604	14.37164211	A0A7P0T868;Q9NY61	AATF
13.34097004	13.26094341	12.86750126	12.54022884	12.74125481	12.56443214	13.07960701	12.97404575	13.27853107	12.80957031	A0A7P0T887;A0A7P0T8I3;A0A7P0T8M5;A0A7P0TAC3;A0A7P0TAV4;Q8IYL3	C1orf174
16.51388741	16.49824142	16.58463287	16.40625	16.51949501	16.47928047	16.6847229	16.6282692	16.6883049	16.60548401	A0A7P0T890;Q03001	DST
14.59150219	14.70764065	14.69402885	14.59593582	14.6080513	14.5136919	14.38612843	14.57222271	14.48877907	14.68641376	A0A7P0T893;O43823	AKAP8
14.86237431	14.96302795	14.56171799	14.65896416	14.73175335	14.67966747	14.56337166	14.57331944	14.18647957	14.54712009	A0A7P0T8C7;A0A7P0T8D4;A0A7P0T8S8;A0A7P0T8Z2;A0A7P0T8Z7;A0A7P0Z4A2;A0A7P0Z4A5;Q9Y5X1	SNX9
18.13232613	18.22506332	17.6781044	17.73846245	17.61045837	17.86483002	17.57022858	17.72613525	17.5672493	17.67071915	A0A7P0T8I6;Q9UBR2	CTSZ
16.05286026	15.89803123	16.03551102	15.85765457	15.91301155	16.17633247	16.23056412	15.9637928	15.93131638	15.93506336	A0A7P0T8J7;A0A7P0TA70;A2A2Q9;Q9Y312	AAR2
16.37247849	16.46098518	16.37190437	16.27031708	16.28193283	16.21416473	16.33042336	16.34605789	16.27185059	16.24391174	A0A7P0T8N8;O14776	TCERG1
11.96771145	12.84242916	11.57687664	11.30973148	11.88207054	12.39132786	11.9105196	11.24326611	12.36210155	10.86286259	A0A7P0T915;Q9NXA8	SIRT5
14.70908928	14.37104702	15.0010891	14.36899471	14.4660511	14.71894932	14.01087666	14.70311069	15.11479664	14.95201015	A0A7P0T947;A0A7P0T9Y9;A0A7P0TBJ4;A0A7P0Z4N7;D6RF98;Q06330	RBPJ
14.36380386	14.11338711	13.33470249	13.757514	13.9753933	13.98836899	14.40211678	13.87333202	14.26701641	14.21187115	A0A7P0T9B2;A0A7P0TA53;A0A7P0TAE0;A0A7P0TBK3;A0A7P0Z400;Q5VIR6	VPS53
14.04318333	14.14738655	13.93809128	13.78982067	13.81293869	14.05397701	13.79865837	13.75711536	13.70079136	13.58544254	A0A7P0T9E7;A0A7P0T9R9;A0A7P0TAR1;P43155	CRAT
12.99198151	13.12470627	12.23876476	12.09815311	12.07361317	12.53115273	12.57043648	12.56453991	12.17908001	12.74444962	A0A7P0T9G7;A0A7P0TAJ0;A0A7P0TAV2;Q99707	MTR
15.12679577	15.19549561	14.87572861	14.6741581	14.81164455	14.7174263	15.15028572	15.03739452	14.48847485	14.38596058	A0A7P0T9I3;O95205;Q5VZF2	MBNL2
18.73768997	18.6471405	18.71426392	18.89624023	18.86101151	18.89305305	18.881073	18.82847404	18.79388618	18.86318779	A0A7P0T9I9;P43490	NAMPT
12.66255283	12.34702969	12.71818256	11.54191017	12.71825027	12.44196796	12.20088673	12.85124302	12.82287407	12.45953751	A0A7P0T9J6;A0A7P0TB24;A0A7P0TB44;H7C0W5;H7C1Q6;Q9NXE4	SMPD4
13.76763535	13.55400181	13.84731674	13.66641903	13.84104156	13.62489796	13.88475037	13.59076405	14.04193306	13.66308117	A0A7P0T9T8;Q9UHI6	DDX20
13.94766331	14.34247017	14.64793491	14.70731449	14.48469639	13.28338528	14.25864124	14.42452717	14.44865036	14.26428509	A0A7P0TA12;B4DR71;Q99720	SIGMAR1
12.27004719	12.52349186	11.83925819	11.77554512	11.78128624	12.06247616	11.73193932	12.02445126	12.0300312	11.99753094	A0A7P0TA15;A0A7P0TAH4;A0A7P0TB19;A0A7P0Z4K4;Q13356	PPIL2
19.17044258	19.54859734	19.48983765	19.71312332	19.42772102	19.69705009	19.28893471	19.70113754	19.63545799	19.73578072	A0A7P0TA71;A0A7P0TB26;P07237	P4HB
17.36986923	16.98914337	17.36930656	17.23937035	17.41129684	17.08949661	16.92122841	17.26903152	17.35035133	17.12618256	A0A7P0TA76;O95573	ACSL3
12.12766457	12.03395844	12.08492088	11.63430119	11.97589874	11.87500954	11.67047977	11.9255228	11.79077911	11.7311039	A0A7P0TA78;A0A7P0TAC5;P42858	HTT
18.91288185	19.1176033	19.29709625	19.48409462	19.36549187	19.57278824	19.15581131	19.46439171	19.61472893	19.53259087	A0A7P0TA85;P35613	BSG
21.13282013	21.11611557	21.02856064	21.12176514	20.9526844	21.0212822	20.89651489	21.06273842	20.85933495	20.95931816	A0A7P0TAE1;A0A7P0TAT8;H0YIV0;P14625	HSP90B1
15.44388485	15.42566681	14.97927094	14.77152157	14.94821072	14.63930225	15.2618103	15.00494385	14.83680534	14.88408566	A0A7P0TAE3;Q9ULX6	AKAP8L
19.3052578	19.42724228	19.29239845	19.28389549	19.25191879	19.21287918	18.98653603	19.37598419	19.24343491	19.29663467	A0A7P0TAE9;A0A7P0TB65;P27824	CANX
16.58130455	16.45910263	16.94753647	16.83808327	16.95611954	16.65110779	16.48106003	16.61374092	16.97278595	16.67145729	A0A7P0TAK7;Q16531	DDB1
18.95127678	18.98626709	19.02043724	19.03795242	18.90234566	19.02857399	18.90622139	19.2170372	19.11926842	19.1466465	A0A7P0TAN7;A0A7P0Z4A0;A0A7P0Z4P5;F5GZS6;J3KPF3;P08195	SLC3A2
14.30168343	11.17160511	13.97832394	14.33911324	14.01185989	14.15084839	14.73826885	14.3028307	14.13857841	14.34785843	A0A7P0TAP9;A0A7P0TB69;H7C5J3;Q92995	USP13
14.14702702	14.1675148	14.1645813	13.98013306	14.0704155	13.73843956	13.59492874	14.29610062	13.97017193	14.10647011	A0A7P0TAQ9;Q8IXB1	DNAJC10
19.26457405	19.20293999	19.08268738	19.11752892	19.03909302	18.94191933	19.08914948	19.01435852	19.03778648	19.02145767	A0A7P0TAW3;P55072	VCP
17.04458237	17.00576591	17.17225838	16.9878273	17.20566559	17.23858643	17.14429474	17.11671448	17.35267448	17.10754013	A0A7P0TAX2;P10515	DLAT
16.47500801	16.31456947	16.30384064	16.17847824	16.32217216	16.06881905	15.80075169	16.38350296	16.38897133	16.26027298	A0A7P0TB70;A2A376;B3KWW1;O95786	;DDX58;DDX58;DDX58
14.74081326	14.36596489	14.86422634	14.62379742	14.83516502	14.77843952	14.85772324	14.53716373	14.97778416	14.67356682	A0A7P0TBP9;Q13325	IFIT5
13.21295547	13.01953793	13.64313412	13.31376553	13.80918407	13.20544434	12.70218468	13.10092258	13.29966068	13.28953362	A0A7P0Z494;P11182	DBT
19.23319244	19.27658653	19.36668015	19.41265869	19.36127281	19.35793114	19.22028732	19.43413353	19.47769928	19.41802979	A0A7P0Z497;P23284	PPIB
15.77621269	15.77517891	15.58866405	15.54232502	15.67873287	15.67534447	15.76917934	15.55893135	15.71979809	15.67338181	A0A7P0Z4C3;E7EX90	DCTN1
16.67861176	16.7206707	16.64889336	16.47323418	16.5545311	16.57736015	16.49910927	16.67997169	16.55897713	16.6228466	A0A7P0Z4F9;P55265	ADAR
12.12399864	12.6420126	11.61091614	12.12887192	11.98540401	11.89158535	11.9786396	12.55191517	12.05498886	12.53863239	A0A7P0Z4L3;B0QY86;B0QY91;H0Y6J8;Q8N3F8	MICALL1
10.88077068	11.47895908	8.949853897	8.93252182	10.2952795	10.53216362	9.213774681	10.80582142	10.84355354	10.18086338	A0AV96;D6R9D6;D6RBS9	RBM47
17.15425682	17.15548325	17.09083748	17.1271019	17.12619591	17.11492538	17.09190559	17.0918541	17.12490082	17.07260323	A0AVT1	UBA6
13.66840744	12.16998196	11.64247036	10.53501701	12.09526539	11.92694092	10.49604416	12.76917839	12.94740009	11.22332287	A0JNW5	UHRF1BP1L
14.28503323	14.35323429	13.73943043	13.83875656	13.89794254	13.96490002	14.3562088	14.01632881	14.20918274	14.05741596	A0MZ66	SHTN1
14.15497494	14.07005692	14.19441223	13.95345211	14.21133614	14.07787037	14.10094643	13.86204529	14.39467239	13.86439323	A0PJW6	TMEM223
15.29771805	15.1312809	15.26825047	15.39039898	15.26150322	15.06757069	14.9366312	15.18392849	15.38072014	15.27458858	A1L0T0	ILVBL
13.01363087	12.68187141	12.59960556	12.55884838	10.72295666	12.58714962	12.69721699	12.39472294	12.55203533	12.51968765	A1X283	SH3PXD2B
13.02819252	13.14084435	12.21966362	12.09465218	12.60325432	12.7263031	12.89275551	12.66954517	12.56090832	12.58697414	A2A283;B5MCD7;F8WCE4;O43759	SYNGR1
12.39581108	12.26834774	10.35106373	12.01981163	12.41965961	10.86600113	12.35993958	11.59423065	12.25567055	11.50089931	A2A2F0;Q86X10	RALGAPB
15.63456345	15.48537254	15.56844902	15.56212521	15.64031982	15.62111282	15.2562685	15.40993881	15.40656662	15.27345467	A2ACR1;P28065	PSMB9
14.55189514	14.34070301	14.39618111	14.20122623	14.52670002	14.2016058	14.20438576	14.13157845	14.2906208	14.06919479	A2IDA3;P29372	MPG
12.35260677	12.44159985	12.75984859	12.70635414	12.76360035	12.27413464	12.16570568	12.50465298	12.59652996	12.56755638	A2RRP1	NBAS
12.0249033	11.64874649	12.68190384	11.3512392	12.39432907	12.31247234	12.66847992	11.98153019	12.45673752	12.13357162	A2RUB6;C9JYB8;F8WDJ0	CCDC66
11.3239603	12.61659622	11.18830204	10.73290253	11.38763618	10.32554722	11.50704861	12.39306164	11.49879646	12.14115047	A3KMH1	VWA8
13.00951862	13.09922218	12.98348427	12.91526031	12.74200439	12.79826832	12.94042301	12.92637253	13.02791691	13.0960598	A3KN83	SBNO1
12.79637337	13.36534309	12.9132719	12.56803608	12.91645527	12.97901821	12.70168781	13.27834415	13.0817194	12.74305916	A4D1E9;C9J8R7;C9JNI1	GTPBP10
14.92115498	14.91401863	14.30804634	14.11410236	14.39096546	14.3266716	14.74880123	14.48297119	14.11935806	14.50752449	A5D8V6;F5H4Q5	VPS37C
15.60780621	15.48299885	15.46775723	15.446558	15.39206696	15.45572186	15.54638386	15.45632648	15.61240005	15.51056957	A5YKK6	CNOT1
14.66816044	14.68065357	14.73238945	14.90768433	14.81839752	14.91915512	14.79625797	14.80300617	14.91962051	15.00067997	A6NCE7;H3BTL1;Q9GZQ8	MAP1LC3B2;MAP1LC3B;MAP1LC3B
12.65194798	14.60730648	14.81705379	14.77867126	14.86582375	14.67418098	14.92603207	14.37939644	14.61615181	14.75895882	A6NCM1	IQCA1L
15.04483509	14.96440125	14.9461832	14.72076797	14.7573719	14.65449142	14.90689278	14.77310753	14.88596916	14.82442951	A6NDG6	PGP
13.86263752	14.01305771	13.33218956	13.38581467	13.19033337	13.4399519	13.35176659	13.40313435	13.33362198	13.23885536	A6NED2;G3V2I3	RCCD1
9.014338493	10.60931301	10.88771248	10.76535511	8.55063343	10.52766991	9.574087143	10.67393017	12.5780077	11.20218658	A6NEL0;A6NL93;P05114	HMGN1
17.03943253	16.98824501	16.98301888	16.77836418	16.93441772	17.12128067	17.07195282	16.99997711	16.95107841	16.97699738	A6NEM2	HCFC1
11.48626232	11.27591419	12.87022877	12.41509533	13.17341137	12.90074253	12.31816196	12.6430788	13.32433128	12.64539719	A6NEP9;Q8NG11	TSPAN14
13.96446133	14.56129932	13.46980572	13.51690292	13.42708683	11.80296993	11.54870319	12.82960796	11.88290596	12.99493885	A6NFM0;E2QRJ6;F6S314	POLR2J2;POLR2J3;POLR2J
16.67417908	16.67299843	16.70217896	16.90570641	16.89377403	16.80036926	16.77533722	16.6143055	16.80029297	16.8160305	A6NFX8;Q9UKK9	NUDT5
14.93936539	14.70897484	15.03284073	14.76856232	15.16872978	14.85765076	14.91619301	14.75867844	14.98903084	14.80134678	A6NG10;K7EMC9;Q969T9	WBP2
13.80371571	14.57060909	14.35663033	14.37448215	14.27290916	14.31375504	14.47170734	14.35473537	15.01856709	14.53204536	A6NGW1;O95070	YIF1A
13.11992931	13.88398647	14.24734306	14.24781609	14.53851795	14.69397926	14.60476112	15.07763481	14.54498386	13.85155106	A6NHB5;A6NHN7;Q14202	ZMYM3
14.79329872	14.96144295	14.98600197	14.88433075	14.90527725	15.10754013	14.80988121	15.11259842	14.96123981	14.91164303	A6NHR9	SMCHD1
13.26231766	13.61156273	12.73301125	13.11043072	12.97324657	13.24667645	12.40976334	11.05130482	11.64065838	12.68600845	A6NIH7	UNC119B
9.952045441	11.96047592	11.5960722	10.20197105	11.79793835	11.38254738	11.51473999	11.64954472	11.80443478	11.00882626	A6NJ78	METTL15
15.36344719	15.33588791	15.57031918	15.43085575	15.53390217	15.35616112	15.49956799	15.34874153	15.51980591	15.47403622	A6NKB8;Q9H4A4	RNPEP
13.26633644	13.4410553	12.99495411	12.91903591	13.15696239	12.6166048	12.49036217	12.79523468	12.95644569	13.23390102	A6NKD9	CCDC85C
15.7858448	15.84179401	16.21848488	16.45314407	16.36016083	16.39980698	16.02371407	16.54848862	16.71356201	16.36833954	A6NLH6;Q9P003	CNIH4
15.49293137	15.45973682	15.92100525	15.86157894	15.70164585	16.09984779	15.48248577	15.63547325	15.80832767	13.82393456	A6NMH8;E9PIF1;E9PJK1;E9PM31;E9PRJ8;H0YDJ9;H0YDL9;H0YEE2;P60033	CD81
14.18239975	11.54314709	12.3844614	12.40526485	12.17834377	10.80060959	11.31377125	12.09807396	11.68141747	12.13818741	A6NML8;C9J6U3;K4DI95;O60879	DIAPH2
19.53409004	19.57106972	18.91244316	18.8302002	19.23394775	19.28765297	19.14756966	18.93027115	18.63817596	18.78833961	A6NMQ1;P09884	POLA1
11.72648716	9.954303741	11.64751911	10.84564018	10.94927406	11.852808	12.052598	12.03488159	11.08960056	12.29826355	A6NN40;Q2M3G4	SHROOM1
17.43356514	17.50598335	17.11956978	17.20752525	17.18743706	17.61304092	17.5540123	17.18751335	17.11564827	17.06021881	A6NP52;O60831	PRAF2
15.59058094	15.71564865	15.52281761	15.85096645	15.79277039	15.65736198	15.84486198	15.71821785	15.74372578	15.71292496	A6PVN5;Q15257	PTPA
14.09531784	14.27811432	14.11329651	13.69049931	14.05642223	14.42162323	14.08222675	13.80175114	13.97003841	14.1928196	A6PVP4;B7ZBQ1;B7ZBQ3;Q9H944	MED20
14.28874874	12.89785767	13.69799042	13.47482586	13.9133482	13.57228565	13.68931293	13.90102673	14.07193089	13.70576191	A6PW57;Q99755	PIP5K1A
14.19876099	14.29763222	14.64021206	14.59456825	14.48031616	14.20406151	14.13148403	14.13549709	14.55260468	14.54174328	A6ZKI3	RTL8C
14.15861988	14.25296879	13.05394745	10.66303349	13.1160984	12.3253994	13.02460384	13.79884243	12.30148888	13.23224545	A7XZE4	TPM2
15.03563976	14.95039177	15.26565361	15.182127	15.24423695	14.99594784	15.02814102	15.3936758	15.47310257	15.28911877	A8CG34;C9JFL1;Q96HA1	POM121C;POM121C;POM121
13.716609	13.26056671	13.32196522	12.82176304	13.052248	13.28192425	13.06027985	13.43568993	12.66218758	13.22784996	A8CTZ0;F8W7U0;Q15811	ITSN1
15.60143471	15.54434204	15.34480858	15.26932716	15.27636433	14.33140755	14.24908257	15.20950603	15.05949402	15.43199825	A8K7Q2	HSPA8
12.94200134	12.81073093	12.7863121	13.20895481	12.53834152	11.99406719	12.4354353	12.41938019	12.22093964	13.42101574	A8MQ02	AFDN
12.84727478	13.28190994	13.32393169	13.13560867	13.26557064	13.81178284	13.69673538	13.33227539	13.55243206	13.37710571	A8MQB8;G3V0J0	FMR1
14.3940506	14.48389721	12.94242954	12.5822258	13.29568577	12.46667385	11.04026222	11.82238483	12.6691761	13.20114326	A8MTY9;O14972	VPS26C
19.12032127	19.14312744	19.37876892	19.47380829	19.27440643	19.3070488	19.34975243	18.80342674	19.21885681	19.24642563	A8MU27;A8MUA9;P55854	SUMO3
18.57310104	18.6337471	18.93324661	18.85572433	18.9162941	18.80680084	18.77150345	18.61517143	19.20242882	18.70338821	A8MUS3;H7BY10;K7ERT8;P62750	RPL23A
18.78747559	18.67879868	19.02937889	18.73577118	19.01045418	19.05369186	19.04154205	18.98820305	19.02847099	18.98411942	A8MWD9;F5H013;P62308;Q49AN9	SNRPGP15;SNRPG;SNRPG;SNRPG
14.12526321	13.54731941	14.34319115	13.87281513	14.36321354	13.00942421	13.6434164	13.09683037	14.12765121	13.37112808	A8MX75;P18074	ERCC2
15.40518761	15.32863522	13.60828972	15.18962288	15.2905159	12.28020763	15.06991005	15.07937336	15.06067467	15.17062759	A8MXF6;B7ZBD5;Q9UBK7;Q9UNT1	RABL2B;RABL2A;RABL2A;RABL2B
13.70104694	13.77002525	12.76250553	12.55222702	14.95974827	12.80043888	12.91519356	13.30403519	12.73933411	12.82701397	A8MXN1;Q96HR9	REEP6
15.99122334	16.00510979	15.76994991	15.62061024	15.76565456	14.57868862	15.29168129	15.6242094	15.31665611	15.4916935	A8MXQ1;P53801	PTTG1IP
12.24742889	12.4667778	13.31652355	12.68380642	12.83575439	12.21824265	12.77147388	12.94594193	13.55656528	12.81059933	A8MYR4;H0YK39;P52657	GTF2A2
15.55399799	15.52337456	15.00935173	14.95550346	15.09588623	15.10604572	15.56062603	15.10802174	15.03563023	15.10169888	A8MZB2;P61599	NAA20
13.88769722	14.49817657	14.42394447	14.11849689	14.17934513	14.63477325	14.18446255	14.12298679	14.63741589	14.23207092	A9Z1X7;E9PCT1;Q8IYB3	SRRM1
19.66972923	19.29359627	19.57522011	19.62470245	18.88100624	18.80314445	19.01654434	18.50195694	19.24268341	19.41136551	ALBU_BOVIN
19.93522644	19.97143745	19.76444817	20.03455162	19.71588898	19.75437546	19.89783859	19.79980087	19.71644592	19.82911682	ANXA5_HUMAN;P08758	;ANXA5
11.11974812	12.12948513	11.45730114	10.72200584	10.71654129	10.99834633	12.61840153	11.65708447	10.16576004	12.21178436	B0QY16;Q6ICG6	KIAA0930
11.66391945	14.7957592	14.71614265	11.75451756	11.62331009	11.03831291	9.789951324	14.71243954	14.41510296	10.67161083	B0QY28;B0QY29;Q9NWS6	FAM118A
17.06351089	16.99181175	17.50619507	17.61031532	17.54672813	17.30351448	17.25827408	17.33769798	17.67147636	17.46123886	B0QY89;Q9Y262	EIF3L
17.2395134	17.27598381	17.27815056	17.2715435	17.17046738	17.16943359	17.36306953	17.1360321	17.54783058	17.2743454	B0QYK0;Q01844	EWSR1
17.6346035	17.64788628	17.41623116	17.52124405	17.37984085	17.53302193	17.51457787	17.41967201	17.42698479	17.50416374	B0QYN7;H3BPC4;H3BQQ9;P63279;UBE2I_HUMAN	UBE2I;UBE2I;UBE2I;UBE2I;
17.54824066	17.42076111	17.55150032	17.45747948	17.59700203	17.36962891	17.60653305	17.22416687	17.37991142	17.37149811	B0QZ18;Q99829	CPNE1
11.06638336	11.83595943	11.60478783	10.53283787	11.81178761	11.95931816	12.06850624	10.90525627	11.55890369	11.89430714	B0QZ40;Q7Z4G1	COMMD6
11.06688499	12.77472973	11.97422028	12.25443554	10.82047367	12.45894432	12.35614109	13.51277065	12.05729294	13.23070145	B0YIW2;P02656	APOC3
17.60724258	17.42712784	17.75465584	17.80922699	17.81275177	17.66986275	17.63051033	17.55903053	17.94156265	17.75912857	B0YIW6;P48444	ARCN1
13.08940029	13.229249	12.61471558	12.85920048	12.56156826	12.8115015	12.9727602	12.36918926	12.35296059	12.75880527	B1AH59;Q9H1I8	ASCC2
17.47934914	17.35323524	17.07504463	17.09181213	17.22972488	17.04702568	17.03248787	17.07662392	16.92480278	17.00535583	B1AH77;B1AH80;P15153	RAC2
15.34684372	14.35192013	15.36582756	13.58055496	15.2921257	15.33035946	14.38722515	15.43482685	15.33689117	15.18391228	B1AH87;P30536	TSPO
13.95157909	14.09406757	14.04433155	13.98458099	13.95303249	13.982481	13.91884041	13.91356659	14.1073904	13.80927181	B1AJQ6;Q86Y82	STX12
15.64806843	15.37465	14.9712801	15.06418419	15.04522705	14.62286854	14.78194332	15.05336571	14.45970535	14.88852501	B1AJY5;B1AJY7;O75832	PSMD10
18.82892036	18.7777462	18.65204048	18.73509979	18.7130661	18.81381416	18.8426609	18.60263062	18.68810272	18.76398277	B1AK88	CAPZB
15.57059479	15.53717709	15.91300678	15.21846485	15.46930981	15.93636131	16.10346031	14.59733582	15.45617962	15.22219372	B1AKC9;P29323	EPHB2
16.80089378	17.03724289	16.99642754	16.7686882	16.91618919	17.34966469	17.05957413	16.90475273	16.58452034	16.82369614	B1AKQ8;F6UT28;F6X3N5;P62873	GNB1
11.62515068	11.3562851	13.04653454	12.71693707	12.70818138	12.92207146	12.50481796	12.75899982	13.02284145	12.74830151	B1AKV3;B1AKV6;F6UTR7;Q9NVA1	UQCC1
15.83423328	15.54159355	15.38837719	15.21463203	15.52251053	15.43183708	15.25627899	15.45659447	15.51399803	15.34801865	B1AL05;H0Y6Y8;Q8N983	MRPL43
14.78149891	14.42543316	14.72367764	14.75644398	14.79970646	13.71030045	14.24754333	14.56466103	14.99233055	14.72139263	B1ALA9;P60891	PRPS1
12.65020561	12.86379623	11.84499645	12.40515614	10.67078972	12.74308777	12.74736691	12.8162117	12.16315174	12.25102711	B1ALB4;E9PD50;Q92540	SMG7
14.62788296	14.59040737	14.08450699	13.88616848	14.38891792	14.3662796	14.43737411	14.26479721	14.19705963	14.05697536	B1ALM5;Q9P0T7	TMEM9
13.31381512	13.30428696	12.89172649	12.78758621	12.39976311	13.05583	12.9650383	12.91525555	12.15878677	13.00582695	B1AMS2;Q14141	SEPTIN6
13.11570454	13.17321777	13.52553082	13.22591305	13.17573547	13.46692467	13.30174446	13.51355553	13.32063484	13.13891029	B1AMW1;H0YDI1;P19256	CD58
13.17493153	12.88273048	13.4938097	13.32916355	13.13047028	13.13513088	12.37095165	13.17178726	12.10282135	12.60599804	B1AN62;Q9HAN9	NMNAT1
13.46746349	13.58759499	13.33419991	13.11831188	13.28656197	13.46725845	13.68913364	13.56877327	13.65063667	13.44913864	B1AP46;E7EW84;Q8TAG9	EXOC6
13.24874878	13.45355988	13.15389156	12.44579124	13.0779438	13.16919899	13.32685661	13.3774929	13.04643726	13.06822681	B1AUU8;P42566	EPS15
15.43161869	15.41252613	14.85059071	14.70016098	14.87691212	15.1257	14.92264462	14.63225937	13.63615608	14.95700645	B2MG_HUMAN;P61769	;B2M
21.1063633	21.05403137	21.15126801	21.05661011	21.11305428	21.15555573	21.06467438	21.03063393	21.19470406	21.13751221	B2R5W2;B4DY08;G3V4W0	HNRNPC
15.47576904	15.73956871	15.36835766	15.6873703	15.45699692	15.62653255	15.37033081	15.71197796	15.49581909	15.67664623	B2WTI3;B2WTI4;K7EJU9;Q6NYC1	JMJD6
16.47237396	16.35514259	16.66731644	16.65098381	16.64463043	16.41651917	16.45871353	16.56234169	16.91312027	16.63692093	B3KS98;O15372	EIF3H
18.29802513	18.26589775	18.17868614	18.33871078	18.24495888	18.28305626	18.05566406	18.29606056	18.16455841	18.17678642	B3KSI3;O15382	BCAT2
15.73732471	15.49069881	15.45704937	15.40261459	15.76373196	15.45370197	15.67765236	15.2521534	15.51990223	15.4835825	B3KSP9;C9J5N1;Q9BTE6	PTGES3L-AARSD1;PTGES3L-AARSD1;AARSD1
15.15052032	14.9750967	14.27112484	14.25223732	14.09435463	14.18520355	14.65051746	14.12594223	13.62423229	14.33432579	B3KTM8;H0YMJ0	MORF4L1
14.08882427	14.25686741	14.94811821	14.9351368	15.30577469	14.81489563	14.72705269	14.19959354	14.45869827	15.18027687	B3KVL5;Q8TBK6	ZCCHC10
13.52040577	10.44773579	13.96624374	13.52188778	11.52830791	13.46894455	13.59520817	13.10807133	13.94566154	12.29207134	B3KY94;O14735	CDIPT
16.66148758	16.77445221	16.66774559	16.66809845	16.85851097	16.85136795	16.86338615	16.68533325	16.82692337	16.8772831	B4DDF4;B4DUT8;H3BVI6;Q99439	CNN2
10.92302227	10.76631546	10.62979889	10.37830353	11.28644466	10.14735031	9.975299835	9.914566994	10.60484123	10.36561203	B4DEE8;P16455	MGMT
10.71818733	12.58506966	10.61665726	11.39170265	11.94317818	12.07082748	11.78760147	12.51339054	11.20122051	12.03647995	B4DEH8;G3V4T2	PABPN1
13.27463341	12.85007	12.66518211	10.01862812	11.84448051	12.12731266	12.62177658	12.21375275	11.52931023	12.13658905	B4DGI9;Q99081	TCF12
10.7024889	11.18764687	10.83064079	10.5583601	10.84274864	11.01613045	9.583470345	10.61265373	11.19396496	10.83099556	B4DJL6;B4DVT3;H3BRY6;Q96SY0	INTS14
18.51566315	18.37107086	18.26249123	18.24963379	18.35696793	18.32224464	18.29071617	18.30828285	18.28046989	18.27193832	B4DJV2;O75390	CS
15.9885788	15.86916447	15.73952866	15.49055481	15.70447922	14.81301498	15.11436844	15.55676556	15.69460678	15.64680862	B4DJV5;Q13610	PWP1
16.1919384	16.23789215	15.14128971	15.24420929	15.73138142	15.39245319	15.78017426	15.49185753	10.40739441	15.5352087	B4DJX4	PLEKHA5
10.52320957	12.12189102	12.2124691	12.10273075	12.29377937	11.50920105	12.35689735	12.25988674	11.96473312	12.64230251	B4DKL7;J3QQK2;Q8NE00	TMEM104
15.07932377	15.33422756	15.1243391	15.02375889	15.03466511	15.15905476	15.28402901	10.90364933	15.27105236	15.3553915	B4DKV7;K7EKX9;K7EN83;Q8TE68	EPS8L1
12.38935566	12.94509506	13.18584824	13.06229973	13.13528347	12.21721745	11.74438381	12.67252922	13.03659916	12.91281223	B4DL54	CHURC1-FNTB
17.27927589	17.26539421	17.05613327	17.01038551	17.21385956	17.22747612	17.03645706	17.13957787	17.06023407	17.09612274	B4DLN1
15.9328289	16.29617119	15.16052151	15.24601841	15.27966881	15.18563747	15.7892561	15.72571564	15.11149406	15.55736828	B4DLP0;B8ZZF7;O00338	SULT1C2
10.88461208	10.69725418	9.634501457	10.33815098	10.11468601	9.593682289	10.54705906	9.965825081	9.200968742	9.61890316	B4DML5;G3XAG9;H0Y4S7;Q9BYM8	RBCK1
16.72554016	17.27132988	15.67555618	16.36845207	16.03048134	16.7123394	16.38055992	16.65229988	15.65091324	16.42907524	B4DQ75;P51397	DAP
15.61651516	15.42280865	16.01711082	16.03292847	15.95731354	15.96453381	15.4801054	16.02774429	16.24230576	16.00393295	B4DR61;P61619	SEC61A1
15.70763397	15.81561947	15.5819025	15.80754375	15.75077438	15.88105392	15.70605183	15.7615881	15.66462612	15.7743454	B4DR80	STK24
13.93125248	13.51072502	13.24802876	13.10947514	13.30456924	14.03730679	13.46198177	13.56569099	12.75766659	13.47367191	B4DRC2;H0Y6S1;Q9UQR0	SCML2
13.27594471	13.40070629	13.05566883	13.23147774	13.08976555	13.60448074	12.61008167	13.43900013	12.97262859	13.24636555	B4DRN8;Q5W0Z9	ZDHHC20
12.77591991	12.4522047	12.17748547	12.04794788	12.37807751	12.55210686	12.82358742	13.40010166	11.54785347	11.87391186	B4DUA7;M0R3F3;Q9NX70	MED29
13.61081791	13.96505547	13.06565762	13.38663578	13.56951714	12.88653374	12.63668251	13.84623718	13.83527756	13.65167046	B4DUD2;C9IYT2;C9IZ27;C9JEN3;C9JW19;C9JWV9;F8WDY4;Q969X1	TMBIM1
14.52828979	14.25868988	14.4354744	14.22754478	14.27094173	14.12588882	14.40079021	14.31378651	14.5343914	14.32427979	B4DXC8;E9PNU1;Q9Y5B8	NME7
19.28514099	19.21692848	19.47562408	19.50083542	19.5145874	19.30708504	19.15575027	19.42222977	19.54829407	19.4371891	B4DY09;Q12905	ILF2
12.75157928	12.1355238	12.81541729	12.74069786	12.06774521	12.99250507	12.36495018	12.63358116	10.64218426	12.35044384	B4DYU2;H3BQV3;Q96MW5	COG8
14.04446602	14.13983345	13.74938774	13.87932873	13.94277	13.67465878	13.73889923	13.08776474	13.70409298	12.06707096	B4DZU5;Q7Z7C8	TAF8
11.89447689	10.61335564	11.45201778	10.21701717	10.8603487	11.12679386	11.54626465	11.42590237	10.55956268	11.78375626	B4E0T2;P50542	PEX5
14.75134659	14.26247501	13.26110077	13.50762272	13.71618748	13.8603363	14.01787853	13.1314106	13.57814217	13.79022121	B4E0Y9;Q8NBY1;Q9P289	STK26
16.38689613	16.5620327	16.61905479	16.86844254	16.70612717	16.12003899	16.0561657	16.50648499	15.77807713	16.74397087	B4E1G1;E5RGY0;Q9BUN8	DERL1
15.8132267	15.70712662	15.77365398	15.7100668	15.88934803	15.75174904	15.692379	15.70034218	15.62899494	15.80446148	B4E1N1;Q6NXE6	ARMC6
14.97251415	14.91460896	15.0640974	14.97944736	15.16292191	15.17361832	14.94631004	15.07616234	15.09107113	15.11264133	B4E2Q0;H0Y9V7;P98194	ATP2C1
12.14041328	12.05297661	11.59693813	12.1690588	12.60743523	12.0244875	10.61039352	11.37488842	10.92580891	11.919384	B4E3T4;Q93062	RBPMS
14.98370838	15.61659908	14.78530121	15.08489418	14.46957302	15.37812519	14.86839581	15.40254307	14.26404095	15.02230453	B5MBX0;Q96FF9	CDCA5
12.34610271	12.84928417	13.58382416	10.49715805	11.08517551	11.89354229	12.97836876	12.6785841	12.62497997	10.6383667	B5MC35;B5MCA1;B5MD16;Q96G28	CFAP36
13.21639252	13.7789011	12.39710426	12.75623798	12.46594429	13.38020229	13.31587887	12.64527416	11.59761524	12.37363625	B5MC96;F6TR53;Q53T59	HS1BP3
15.85746765	15.83063984	16.13917351	15.94267082	16.02316093	15.8097105	15.88664627	15.97333717	16.1845932	15.97403145	B5MCF9;O00541	PES1
13.62270641	12.93547916	12.60312176	11.46347046	12.56412315	12.1205759	12.33527565	12.59424686	12.98396397	12.31066704	B5MCW3;H7C127;H7C128;H7C179;Q9H0E9	BRD8
17.50798225	17.68523598	17.68089867	17.72174835	17.57343102	17.76573753	17.61887741	17.5622673	17.59348488	17.71191788	B5MD17;J3KS05;P83916	CBX1
13.55075359	13.08640671	13.75299644	13.81930542	13.92006874	14.22692299	13.69881725	13.77962017	13.72094917	13.59705925	B5MDE0;Q96AA3	RFT1
19.37558937	19.29041481	19.2885704	19.36539841	19.27486801	19.02906036	19.20236778	19.14425278	19.24843407	19.1736908	B5MDF5;P62826	RAN
14.98400307	14.78985596	14.94765568	14.97441673	15.00117302	14.952775	14.91908455	14.67554855	15.13062096	14.76234818	B5ME97;E7EW69;Q9P0V9	SEPTIN10
12.65496254	12.71982861	12.93434525	12.55583858	12.55917835	12.9022131	13.20885563	13.00847244	12.81592178	12.69487286	B7WP74;Q9HCG8	CWC22
13.83773994	14.02476501	14.14071083	14.06577682	14.31247997	13.98359203	14.2178688	13.97015476	14.13955307	14.00189495	B7WPG3;C9IYN3;Q8WVV9;V9GYK2	HNRNPLL
7.451356411	8.048446655	9.152861595	10.85209179	9.038170815	9.180046082	7.697507858	10.02559853	10.41338444	9.247350693	B7Z2Y2;Q14746	COG2
12.37312794	12.35599899	12.00241756	11.88956261	12.38355923	11.89779758	12.50730896	11.78429413	12.32911777	11.87234306	B7Z3R2;Q9ULQ1	TPCN1
14.99537945	15.36613274	14.95508194	14.79318428	15.15136051	15.24405289	15.53752899	14.94085026	14.8417902	14.70945549	B7Z5N5;Q15796	SMAD2
11.62491989	12.0093317	12.27203941	11.99805641	11.78710747	10.30375671	11.93468189	11.14478397	12.30468464	12.88477802	B7Z637;Q8IUR7	ARMC8
18.39245224	18.59347153	17.95627022	18.08264732	17.96250153	18.45941925	18.6095562	18.02296257	18.00421524	18.00119781	B7Z645	SYNCRIP
16.02149582	15.86715221	16.06200027	15.75403881	15.99664211	16.01299858	16.11191177	15.86126041	16.12009621	15.84258938	B7Z6D5;Q96GQ7	DDX27
19.64096642	19.75321388	19.37088966	19.28188324	19.45650291	19.56145096	19.77383232	19.94010162	19.10136223	19.29995728	B7Z6Z4;F8W1R7;G3V1V0;G8JLA2;J3KND3;P60660	MYL6
15.73875427	15.87078762	15.9597168	15.8985548	15.82376289	15.51979923	15.66710758	15.94348621	16.19442368	15.86782837	B7Z7F3;Q9H6Z4	RANBP3
13.40650177	13.61463356	13.40484524	12.96917915	13.32650661	13.31551647	13.42907143	13.78624344	13.58043098	13.45137787	B7Z7P0;Q14139	UBE4A
15.35381603	15.53929424	15.01852798	15.17130089	15.12421894	15.27332783	15.2291584	15.25645256	14.94129086	15.28163815	B7ZC38;Q9NR46	SH3GLB2
13.74404526	11.11203289	13.46897221	13.37416935	13.1912365	13.0585022	13.75210762	13.48013878	13.94745255	13.80844021	B7ZKQ9	SCARB1
13.70071697	14.11643696	13.76249981	13.74057388	13.52067471	14.16393375	13.60371971	14.01978111	13.95654202	13.76919746	B8ZZ77;H7BZ14;Q9H2H8	PPIL3
14.37679482	14.77256012	13.94996929	13.97530174	13.77685738	14.15323925	14.15101719	14.19318676	13.99687099	14.12904167	B8ZZ99;Q96NT0	CCDC115
15.18640709	14.58427238	14.65995598	14.55640316	14.91505241	14.78434753	14.46276569	14.6723175	14.93878174	14.71632862	B8ZZA8	GLS
12.12526226	11.69934082	10.38243961	12.06637859	11.82458496	11.40664005	11.96144962	11.82345676	12.48822975	12.05335522	B8ZZC8;B8ZZE3;B8ZZY8;E7EMN2;F5H4E8;Q9NRN9	METTL5
13.58112335	13.80688572	13.76914501	14.02175999	13.86594486	13.83037186	13.53211784	13.5971489	14.15137482	14.05025959	B8ZZD4;Q86VP1	TAX1BP1
14.62325668	14.70716858	14.6518774	14.36543465	14.58755302	14.71190643	14.5905695	14.67946434	14.44815922	14.4306469	B8ZZG1;Q9NZW5	PALS2
13.82196236	13.58858871	13.79219246	13.89646435	13.9048605	13.27411747	13.41842842	13.73987198	13.8471489	13.90195274	B8ZZK5;O43924	PDE6D
17.58753777	17.58041191	17.27704811	17.2149353	17.27902794	17.32611465	17.32402611	17.26933861	17.19375038	17.1893425	B8ZZN6;P63165;SUMO1_HUMAN	SUMO1;SUMO1;
19.94027328	20.0389576	18.4315815	18.87485123	18.78089333	19.08218575	19.6316452	18.98059654	18.3311882	19.1612587	B8ZZQ6;P06454	PTMA
14.3050518	14.1412611	14.15076351	13.96908569	14.28149891	13.99385262	14.12744427	13.96008587	14.47188568	14.40605927	B8ZZY2;P52594	AGFG1
15.73814106	15.8010807	16.20865059	16.072855	16.17538643	16.17050171	16.00500107	16.14084625	16.34016228	16.09877586	B9A018;Q53GS9	USP39
13.30131245	12.26419926	11.34850311	11.9200058	12.65578651	12.70268345	10.61311626	12.81513691	13.15423965	10.19013691	B9A054;Q8TEB9	RHBDD1
14.90009975	14.51974678	15.01524258	14.74688435	14.80301571	14.59273624	14.52588177	14.80527592	14.80623436	14.83367348	B9EGA3;J3KMX2;Q92925	SMARCD2
13.24699497	11.07396698	13.40422058	12.96542358	13.55558205	11.05648708	10.2739687	12.75078392	12.08843517	12.77318954	B9ZVV8;Q53H47	SETMAR
15.38843536	15.65289593	15.13981724	15.20507336	15.31432629	15.46871376	15.31572247	15.11656857	15.10019207	15.28990173	BID_HUMAN;P55957	;BID
13.59281254	13.57585812	13.27579975	13.37880898	13.71211147	13.44642925	13.74421215	13.27473545	13.83506012	13.48350143	C4AMC7;Q6VEQ5	WASH3P;WASH2P
13.9147501	13.72228241	14.143507	14.20205212	14.29512882	13.83873272	13.90743256	13.95471573	14.07452679	13.99587917	C9IYN7;C9J2D6;C9J9N8;C9JA82;C9JEX8;C9JLH5;Q0PNE2	ELP6
11.82252121	11.66853237	12.02301311	11.64125729	12.53415966	11.35914612	11.43286991	12.14387035	12.36862469	12.02870655	C9IZF6;P41247	PNPLA4
16.78082466	17.36868286	16.82843971	16.69646263	17.14935875	17.05788422	17.69079781	17.47268867	16.87529755	16.95960045	C9IZG4;O60888	CUTA
16.11329269	16.11479378	16.12557411	16.09692574	16.04476738	15.57439804	15.81035614	15.90861416	15.99076748	15.96152306	C9J050;C9JEJ2;P49585	PCYT1A
14.35229969	14.3865099	14.13833332	14.21708965	14.11604691	14.11841869	14.2200737	13.91726208	14.34564686	14.18639374	C9J0A7;Q9UQN3	CHMP2B
13.29286957	13.05821896	13.04507256	12.74873638	13.26236629	12.95554352	13.14512444	12.90628529	13.57085419	12.9986496	C9J0I9;Q86WB0	ZC3HC1
13.14155769	13.20451927	13.25144482	13.42903233	13.47430038	12.52127266	13.03095818	12.97643852	13.2841711	13.38473129	C9J0J7;G5E9Q6	PFN2
16.61071777	16.70513535	16.64416122	16.47078323	16.61810493	16.79613304	16.66619301	16.76148224	16.69446945	16.41564751	C9J0K6;P30626	SRI
15.36190224	15.08752823	15.5894165	15.43463516	15.58411026	15.69444466	15.71573734	15.24855423	15.85634518	15.6422987	C9J180	UBE2E2
15.11142921	15.13167191	14.38458157	14.72986889	14.8410387	14.46438599	15.13473606	14.74055195	14.60972786	14.83329201	C9J1C6;C9J391;F8WBU5;H7C426;Q9P0P0	RNF181
13.73179436	15.05393887	15.69102669	15.38303566	14.93192768	14.8249197	14.21237659	15.88227749	14.01617908	15.74789429	C9J1D1;Q8WTS1	ABHD5
13.89265442	13.93930626	13.85513687	14.50072479	14.20365238	13.78444481	13.52353573	13.70016861	12.60269356	13.81864357	C9J1Z8;P84085	ARF5
15.97396469	15.9273243	15.91344166	15.80358505	15.8348484	15.77352524	15.76360416	15.85153103	15.92453957	15.87642384	C9J2Y9;P30876	POLR2B
13.28091145	13.10501289	12.73814106	12.77353191	12.80450916	13.26259422	12.83139801	12.91272831	12.58063889	13.03338528	C9J3I2;Q9P0J7	KCMF1
18.32904625	18.06992722	18.00283051	18.12665367	18.16549492	18.30830574	18.36410522	17.90294456	18.0911293	18.08806038	C9J4Z3;P61513	RPL37A
12.01838779	13.13464832	12.4129591	12.74610043	11.74122715	12.03176022	10.55066776	11.76824284	11.90112209	12.00874043	C9J5X1;P08069	IGF1R
13.30785465	11.49475765	13.82383537	13.27588654	13.85712242	12.81685162	12.87739754	13.6274004	13.21393681	13.51945591	C9J6J1;C9JA07;Q9GZY4	COA1
12.58810234	13.13953781	13.37415218	13.03132629	12.91793823	13.21121502	12.99840832	12.86741161	12.99961853	12.78543949	C9J6V2;Q8TA86	RP9
14.38136482	14.26177025	14.08409977	14.29623222	14.35683537	13.67062569	14.04924011	14.11734962	14.61083317	14.24539661	C9J712;P35080	PFN2
13.08433342	12.46681881	13.40627575	13.29624939	13.55365181	12.91353512	12.97513676	13.29919529	13.72916889	13.20170498	C9J7E5;Q9Y5L0	TNPO3
14.44460487	14.51196957	13.86654663	14.12661266	14.50478935	13.98584461	14.8979702	15.26597977	14.62858105	14.57576752	C9J8T6;Q14061	COX17
14.34392643	13.94822025	14.86543083	14.27830601	14.93219948	14.29579258	14.56026649	14.55834389	14.75108433	14.65598583	C9JA08;Q96D46	NMD3
17.98381233	17.8573761	17.0225544	16.83622169	17.18825912	17.51579094	17.5896244	17.31242752	16.45380402	16.99858093	C9JA28;Q9UNL2	SSR3
16.78357124	16.81973267	15.21588707	15.21665192	15.20893097	15.89015007	16.34502983	15.87046719	15.42675018	15.68542767	C9JAW5;C9JNU6;Q9Y241	;HIGD1A;HIGD1A
15.1358242	15.12383842	15.04508781	15.25042629	15.14103127	15.37104511	15.1564188	14.91754913	15.06782436	15.05668163	C9JBI3;P78330	PSPH
15.19131279	14.91201687	14.64034367	14.34085083	14.98201656	14.45651054	14.71665668	14.5913868	14.62563038	14.53964996	C9JBY7;Q9Y291	MRPS33
15.16042137	15.17909527	15.42231083	15.00542736	15.12244129	15.66598225	15.23737049	15.47336102	15.390172	15.04179287	C9JCB7;C9JFU6;C9JW33;Q8NBZ7	UXS1
14.84264183	14.5612669	14.44539452	14.73984241	14.66700554	14.76785564	14.69033146	14.46770477	14.64666748	14.66365337	C9JCC6;E9PNC7;Q14919	DRAP1
14.42603779	14.3364172	14.78727818	14.45632553	14.6427803	14.64687443	14.77881241	14.11557484	14.64383793	14.66818237	C9JEH3;C9JG97;Q13685	AAMP
14.53527164	14.84626865	14.78337574	14.87869167	14.57656574	14.92751884	14.76657486	14.78171253	14.8319397	14.78848743	C9JEV6;Q9UJ70	NAGK
14.72771549	14.57638741	14.51934433	14.19067955	14.37209797	14.09489059	14.55394459	14.40695572	14.52431774	14.33001804	C9JEZ4;Q9UKI2	CDC42EP3
15.93487549	15.73562336	16.06616402	16.05035782	16.08212471	15.72893524	15.89105701	15.91180992	16.16297531	16.01633644	C9JFE4;Q13098	GPS1
17.6264801	17.42000008	17.4730072	17.10968018	17.53396797	17.01234055	17.52790833	17.5241127	17.16902542	17.29101563	C9JFR7;CYC_HUMAN;P99999	CYCS;;CYCS
14.21681118	14.25973701	14.38059044	13.8895607	14.38890743	14.17071438	13.97201824	14.38678932	14.0214386	14.25519466	C9JFV4;Q8IZL8	PELP1
16.74600983	16.7414341	16.56227112	16.63373184	16.64206123	16.63754272	16.71653557	16.48952103	16.58133125	16.51740456	C9JIF9;P13798	APEH
14.88088036	14.75387669	15.29042339	15.37048149	15.63460064	15.05631351	14.78044033	15.48838902	15.81650066	15.44922733	C9JIS1;C9JXA5;C9JZN1;P62879	GNB2
14.46889591	12.90379143	14.07291317	14.07376099	14.76514721	14.48847198	14.58102703	14.39352512	14.67387009	14.31826019	C9JIZ6;P07602	PSAP
15.59519005	15.05163383	15.53301144	15.09358406	15.60866261	15.03484917	15.30045414	15.05638695	15.73113632	15.18625641	C9JJ19;P82930	MRPS34
11.80722046	14.25668907	13.86574364	12.85622787	11.4883585	14.29251099	15.03151321	14.78132534	13.25097466	14.45395184	C9JJQ8	TUBA4A
16.91295242	16.94111252	16.56839943	16.48074722	16.99708176	16.59339142	16.43516541	16.81843185	16.15696716	16.32427406	C9JJT5;G3V325	ATP5MF-PTCD1
13.54563904	13.48553944	12.79268265	12.70183372	12.77339649	12.78085709	13.03896618	12.72327709	13.30323505	12.31567192	C9JKF1;Q5K651	SAMD9
15.0173254	15.18067074	15.03207779	14.93323898	14.97371483	15.08969975	15.23895359	15.15972805	15.12456608	15.00929356	C9JKI3	CAV1
13.01881409	13.32633877	14.33460712	13.44943333	14.08112335	13.90196037	14.19936085	13.31213284	14.50450325	13.79420185	C9JKQ2;O43676	NDUFB3
16.85556412	16.97371101	16.90923691	16.62308502	16.96417999	16.72476768	16.5211525	16.99886131	17.30892563	16.90006828	C9JLI6;H0YMV8;Q71UM5	RPS27L
14.93768406	14.92237377	15.21326447	15.25934887	15.37364101	15.2269783	15.0138607	15.07616806	15.26712418	15.23297501	C9JLU1;P52434	POLR2H
15.6601038	15.70356941	15.35779476	15.37465668	15.29289246	15.22750759	15.6682415	15.27186966	14.8664999	15.52234077	C9JLW8;I3L2L5;I3L4Q0	MCRIP1
13.66260433	13.51482391	13.81682491	13.67141819	13.92405128	13.39478111	13.56409454	13.45751476	13.70130634	13.64740562	C9JNE2;C9JXC3;Q9Y530	OARD1
19.18451691	19.16753769	18.75906181	18.80184937	18.88053894	18.60606384	18.89740944	18.7330761	18.37438583	18.63323593	C9JNW5;C9JXB8;P83731	RPL24
13.64422035	14.65202045	14.02735901	10.73239994	11.63683319	14.40666485	14.48136806	11.72264385	11.61578655	13.99266338	C9JNZ0;C9JRY4;Q96IW7	SEC22A
16.26823044	16.310215	16.33624458	16.51184082	16.37943649	16.47354126	16.07491493	16.4349041	16.28471375	16.47980881	C9JP16;O75718	CRTAP
13.54912949	13.31647015	13.52769566	13.46754265	13.5266695	13.40437126	13.80563545	13.0596838	13.76471043	13.2772646	C9JPQ6;Q9BYB4	GNB1L
14.17229652	14.66270256	14.35969162	14.26102448	14.33736801	14.55650616	14.47986221	14.15849686	14.37799454	14.52480221	C9JQ41;H7C525;Q4VC31	MIX23
14.00164509	13.80715466	13.17382908	13.14679241	13.55209541	13.32750702	13.96639538	13.67157841	12.90161228	12.76755047	C9JQ48;E2QRF5;H0Y398;Q9H8U3	ZFAND3
15.97820091	15.91046238	16.0982151	16.07439423	15.98774052	15.76620007	15.69056606	15.87691975	16.00650215	16.09106636	C9JQD4;O43447	PPIH
12.69151402	11.70191574	12.62065506	10.61440182	11.13663673	11.64737511	12.50119209	11.72890949	10.70964146	9.778668404	C9JQS9;E7EUY3;E7EX59;E9PDR0;P05166	PCCB
12.59698009	10.95524597	13.00013256	12.28298759	13.14606094	12.98897362	12.92889214	11.99598122	13.11957741	12.81499958	C9JR82;C9JU35;F8WAU6;F8WB00;F8WC42;G3XA94;H7C5U1;Q9NPL8	TIMMDC1
14.05358696	14.24486637	13.80792332	13.75441742	13.71102715	13.91235065	14.16843414	13.96680164	13.72048855	14.06099319	C9JRJ5;Q9UGP4	LIMD1
17.21752357	17.19164085	17.1068573	17.01240158	17.19478607	17.30402184	17.11171532	17.1588707	17.21928787	17.09347153	C9JRZ6;F8WAR4;Q9NX63	CHCHD3
15.48077679	16.16538811	15.67887211	15.2907629	15.71409702	15.19406128	15.7007494	15.00444221	15.57920742	15.44634533	C9JSZ1	FUBP1
18.02658653	18.14890862	18.19992447	18.19895172	17.99380875	18.44431686	18.06762123	18.05086899	17.92123413	18.16084862	C9JTA6;G5E975;Q12824	SMARCB1
11.77728844	11.26839542	12.01744652	11.84976196	12.39737415	10.53572559	10.73385048	12.95846462	11.7114563	12.69605255	C9JU48;D3YTC9;H7BZV9;Q6NXT1	ANKRD54
12.51394081	11.29045391	12.77488804	10.95128918	13.04313183	12.42810154	12.35821152	12.27036095	12.80473709	11.7520771	C9JUV8;O00478;O00481;P78410;S4R3N0	BTN3A3;BTN3A3;BTN3A1;BTN3A2;BTN3A2
13.53279305	13.48645496	13.81118393	13.82631683	13.57824802	13.66343021	13.29191017	13.68631554	14.01274109	13.74233246	C9JVE2;Q96GG9	DCUN1D1
14.54494095	14.4915905	14.45761013	14.23923492	14.51002884	14.54224491	14.41918564	14.27676201	14.41699123	14.38280487	C9JXG5;F8WCP5;Q13769	THOC5
10.56992149	9.924131393	10.22005939	9.883055687	10.68908882	9.992028236	9.971657753	10.45104885	11.68360043	9.314789772	C9JYJ8;C9JZE3;E7EVL6;Q9BWE0	REPIN1
15.01739025	15.51325703	15.03419113	14.86405945	14.71836948	15.54120827	15.71528816	15.07495689	15.13908863	14.74252415	C9JYM0;O75817	POP7
13.0033884	13.37381363	14.0185442	13.54154682	14.01384163	13.88896084	13.62195492	13.96645832	14.84263706	14.13410282	C9JZG9;C9JZY6;P62256	UBE2H
16.67332077	16.6811657	16.55384827	16.62255669	16.55828476	16.69839096	16.54176903	16.58972549	16.45163536	16.57642365	C9JZI1;P35249	RFC4
16.19685173	16.08760643	16.04366302	15.8538208	16.09702301	15.93340969	16.08971405	15.95706558	16.00875473	15.96682072	C9JZR2;O60716	CTNND1
18.04775047	18.09686089	17.67817307	17.70864105	17.85907364	17.98263168	18.0893383	17.91157341	17.6553688	17.8978672	C9K0J5	RAPH1
13.91255283	14.91194916	14.00303078	14.29367542	13.79844761	14.58287811	14.01976776	14.24086952	13.80353642	13.87029362	C9K0U5;E2QRF9;H7C608;O75496	GMNN
14.23781872	10.69378757	12.44096661	11.19512081	11.36106205	10.63195038	11.02241421	12.24517059	11.78391743	13.7446022	CAS1_BOVIN
16.13568115	15.82168102	15.83682823	15.64824772	15.84397888	15.56776047	15.86169434	15.77223873	15.84429169	15.71741104	CATA_HUMAN;P04040	;CAT
14.22149944	14.04740334	14.27758408	14.18986988	14.22523022	13.84874344	14.23826313	14.58477497	14.10245609	14.07502365	CYB5_HUMAN;P00167	;CYB5A
18.03745461	17.9639225	17.92072296	17.76429939	17.98473358	17.68693924	17.72428131	17.77570724	17.93783569	17.74162102	D3YTB1;F8W727;P62910	RPL32
13.37028313	13.63523388	12.98566818	12.75674915	13.09855366	12.72639656	12.91470528	13.08464813	12.35705566	12.93539429	D3YTC1;Q9NZE8	MRPL35
13.54483509	14.68960094	14.00515366	14.09522057	13.65349293	13.62387276	13.60173225	13.70917988	13.61841011	13.98152733	D5H3J5;Q2L6G2	HLA-B
15.54974174	15.50216961	15.70765686	15.51980209	15.3984623	15.4773016	15.56704044	15.38475227	15.4703598	15.43646145	D6R938;E9PBG7;E9PF82;Q13557	CAMK2D
13.72455406	13.78372097	13.46254826	12.98639011	13.4270525	10.08085442	12.97645569	13.28585625	10.85917664	12.99959564	D6R9N5;D6RB08;K4DIA5;P14316	IRF2
18.96203613	18.9295826	18.77794647	18.87427902	18.69707108	18.50952148	18.40652657	18.87760735	18.75332451	18.84512329	D6R9P3;D6RBZ0;D6RD18	HNRNPAB
11.0694046	11.27362728	11.86204433	11.14029884	11.21158314	11.71011639	10.3687191	11.75088501	12.18780041	11.53715897	D6R9S7;D6RDB0;D6RDM3;D6RHE3;Q96GZ6	SLC41A3
16.81346703	16.84665108	17.25188065	17.23343468	17.26887131	17.07704353	16.92635536	17.30694199	17.68328857	17.23723793	D6RAA6;P57088	TMEM33
15.07099819	14.95619392	14.2046833	13.95409298	13.73932266	13.88490963	14.20278072	14.37528419	14.27048874	14.4312458	D6RAZ2;D6RF21;D6RGC7;H0Y8S9;H0Y963;Q9UBK8	MTRR
12.52374554	12.35011387	12.06993389	12.30066967	11.67063618	11.60886574	12.58568096	12.17113113	12.42747402	11.83564949	D6RBM3;P55212	CASP6
12.82052708	12.35911083	12.57856083	11.83341312	12.31371117	11.60035133	11.2665863	12.29789543	11.93934441	12.46903801	D6RBS5;Q8IZ81	ELMOD2
15.30284786	15.28234005	14.84347439	15.52940083	15.04981232	14.86797714	14.16425705	14.70548916	14.47258377	14.85873985	D6RCP9;D6RFG8;P27707	DCK
14.60297298	14.94180584	14.33994484	14.47774506	14.39300919	14.69697285	14.70820904	14.68203735	14.15193653	14.4682703	D6RD46;E7EPK0;E9PDJ9;G5EA03;H0Y8P3;Q9UPQ0	LIMCH1
13.61182022	13.46104145	12.97072315	12.29456139	9.642074585	12.41493702	12.73165321	13.32188416	12.69803524	12.9252634	D6RDZ6;D6RIX3;P51790	CLCN3
13.92423153	12.59860992	13.64968491	14.83957672	14.59832573	14.25803852	13.71278381	14.67459869	14.92074871	14.57570934	D6RE79;Q14728	MFSD10
12.90969181	12.46594048	12.57748985	11.57747459	12.41339874	11.89217663	12.07480526	12.365345	10.44199848	12.17680359	D6RE80;E7ESC7;Q7L5Y9	MAEA
12.70953751	12.50938702	12.98133373	12.62475491	12.79906273	12.26328373	12.77103138	12.70022488	13.35873222	12.90957737	D6REA1;Q9H173	SIL1
16.57751083	16.69523048	16.50332642	16.62165833	16.53037453	16.54921913	16.50624275	16.49992752	16.42296982	16.46602249	D6RER5;D6RGI3;Q9NVA2	SEPTIN11
16.82707405	16.62426186	16.92115402	16.98607445	16.95533752	16.84265137	16.87573433	16.89791489	16.96284294	16.94316864	D6REX3;O94979	SEC31A
15.44659328	14.84396362	14.89819241	15.06177711	14.83145237	15.32092094	14.79623508	14.72138405	14.64837456	14.50118732	D6RF48;Q9P2W9	STX18
14.57611084	14.50776577	14.61228466	14.57893467	14.56442165	14.86417007	14.71292591	14.46645737	14.6622963	14.56420898	D6RFI3;D6RGY8;E7EQR8;Q9GZM5	YIPF3
17.13022995	16.76857758	17.23011017	16.90447998	17.28197289	17.1070118	17.02371025	17.08371735	17.38274956	16.95199776	D6RFM5;P31040	SDHA
11.37844372	14.01492786	11.6636734	13.3674469	13.38583946	13.45637226	13.4595871	13.7608099	13.37852287	13.7738409	D6RFW1;Q96EQ0	SGTB
14.78734493	16.75973892	14.77519417	16.45215225	14.95354271	16.80603218	14.92378426	16.70966721	14.72609615	16.51199532	D6RGG3;Q99715	COL12A1
13.39088345	11.95374775	13.07489872	10.80962372	12.89035225	11.58862972	11.35251045	12.16842365	12.14120674	12.58308125	D6RGK3;D6RHW1;D6RIE8;D6RIV9;D6RIY1;Q16594;Q9HBM6	TAF9;TAF9;TAF9;TAF9;TAF9;TAF9;TAF9B
15.32406044	15.5362196	15.54153728	15.12980843	15.51285648	15.24901772	15.86979961	15.91109848	15.28772831	15.11317539	D6RGV5;D6RIE3;H0UI06;P14406	COX7A2
14.11738205	14.03721333	14.1871109	14.02625561	14.03040123	14.09820461	13.61950588	14.10768509	13.86578369	14.0865202	D6RGX2;Q9NUQ7	UFSP2
16.40123558	16.15966606	16.24400902	16.17417717	16.06271744	16.06887817	15.78981876	15.9903841	16.12033463	15.96331501	D6RGZ2;Q96J01	THOC3
14.55239964	14.42575741	14.56305504	14.41845036	14.63377666	14.26556492	14.50273037	14.3660078	15.03991032	14.4397049	D6RIY6;Q06265	EXOSC9
14.22329903	14.38740349	14.01704884	13.81926537	13.92015457	13.55587959	13.79849243	14.11160469	13.99374485	13.65600204	D6RJ07;Q9UL40	ZNF346
13.2687149	13.04472828	12.98979664	12.69695187	12.94339275	12.87487984	13.07025814	12.96993256	12.52851582	12.77019978	D6RJC3;E7EQN9;E9PCZ3;E9PHC0;O15327	INPP4B
14.4078064	14.4663744	13.80834675	13.8236599	13.82497978	14.34399891	14.37739658	14.24420643	13.77593899	13.63768864	D6RJF2	PAIP1
14.08088779	13.8588028	14.15049744	14.11585808	14.08523178	14.05156803	14.48274899	14.17865944	14.40904713	14.20489979	E3W994;J3KR49;O75122	CLASP2
15.64866543	15.49112606	15.71429634	15.48511696	15.68856525	15.36759949	15.30629063	15.72527504	15.79367828	15.65733528	E5KLJ9	OPA1
14.50595379	14.74635983	14.58961773	14.76960373	14.6342659	14.64103413	14.78565216	14.75709152	14.55872822	14.64261627	E5RFF9;Q9BRT9	GINS4
16.01424408	16.04791069	15.57194138	15.39629364	15.63776493	15.56398296	16.03160286	15.50356388	15.47710896	15.43983459	E5RFP0;Q8WVJ2	NUDCD2
14.53040695	14.38712215	14.25123501	14.51775932	14.07785892	14.61974812	14.42257214	14.10254574	14.09084415	14.44888783	E5RFR7	TPD52
13.66288567	13.21376801	14.21686363	13.01964283	13.99035931	13.57150269	13.85488892	13.75599861	14.41147137	13.7866869	E5RFZ8;E5RGA7;E5RIP4;E5RJ40;E5RJG5;Q15043	SLC39A14
12.55826283	11.89160252	12.77815437	12.12264252	12.25600338	12.47173023	12.31323242	12.69078732	11.76539326	12.71144009	E5RGE5;E5RI74;E5RJ74;E5RK75;Q8TCF1	ZFAND1
14.59717274	15.31441498	15.31208706	15.31849384	14.97553349	15.28065491	15.42835045	15.05107021	15.52013588	15.32392597	E5RGN3;E5RIM7;O00244	ATOX1
13.69942284	13.93000507	13.47602844	13.83339119	13.87391567	13.75305843	13.65464878	13.86288166	14.02332497	13.79711533	E5RGS2;Q9H6H4	REEP4
15.58074474	15.75542927	15.24247169	15.39743805	15.30339813	15.59986305	15.64538193	15.40115356	15.24983025	15.47665977	E5RGS9;Q9NRG0	CHRAC1
11.71024895	11.36437988	12.19186592	11.88883591	11.70089245	11.67380524	11.53434372	11.56802654	12.21560287	11.9642868	E5RGT2;Q49A68;Q96MH6	TMEM68
16.64018631	16.93662834	16.61101913	16.55017471	16.68562698	16.88646126	16.87744331	16.73099709	16.63137627	16.58883286	E5RHG8;Q15369	ELOC
17.00584984	16.78474236	16.91423416	16.99069214	17.07753754	16.79013443	16.85739899	16.8469429	16.81771088	16.80663681	E5RI99;P62888	RPL30
14.69397926	14.87551689	14.99564934	15.17663002	15.04107571	14.97621059	14.5997591	14.8242979	14.97473049	15.09839344	E5RIA4;E7EMB6;E7ETB3;Q9ULA0	DNPEP
13.2620821	13.24387169	12.99121857	12.54960537	12.80364895	12.96342659	12.58719921	12.80942822	12.18162155	12.75988102	E5RIJ0;E7EW18;P06746	POLB
18.49531555	18.52490997	18.29303741	18.34340858	18.34537697	18.37248993	18.54041672	18.17276192	18.21159363	18.32557297	E5RIW3;E5RJD8;O75347	TBCA
13.88985443	13.78390789	13.79408264	12.97936344	13.12880421	13.32893848	13.16378784	13.37764263	13.09542084	13.10043907	E5RJ52;P53677	AP3M2
12.88587189	12.45101738	11.99830246	11.75260353	12.29133701	12.45353603	12.23757076	12.10537052	12.26097393	10.42748928	E5RJF8;E5RK82;O15182	CETN3
13.26704216	13.40003109	11.54224873	11.84529686	11.3717289	12.90737057	13.14119911	12.83477974	11.4238596	12.98368549	E5RJP2	SORBS3
16.20508003	16.19628906	16.28283119	16.18536949	16.12336922	16.41115189	16.31148148	16.11069107	16.42383957	16.49458122	E5RJR5;P63208	SKP1
14.55905151	14.53787231	15.02560043	14.99883366	15.05494213	14.69451427	14.66719055	14.95393085	15.20189857	14.94115257	E7EM64;Q7L5N1	COPS6
16.30173683	16.36633301	16.52296257	16.43437767	16.57040787	16.64162064	16.25341988	16.59642792	16.64543343	16.61065674	E7EMK3;J3QLD9;Q14254	FLOT2
14.23166466	14.51036358	14.81112003	14.51051903	14.83297729	14.83676243	14.39999294	14.43961525	14.78682041	14.64144993	E7EMS2;G3V3D1;G3V3E8;H0YIZ1;J3KMY5;P61916	NPC2
14.31782055	13.957901	13.78396225	13.65520954	13.89650249	14.03150845	14.30585861	13.68456841	13.82583904	13.8365078	E7EMZ9;E9PBC6;O95359	TACC2
11.41332626	11.00042057	11.21355438	10.56179047	11.81264591	11.6462307	11.4550066	12.45115089	11.89543819	11.24269581	E7EN44;Q86WA8	LONP2
14.49936771	14.55658913	14.05775356	13.73093414	14.06485844	14.34009457	14.31342888	14.08617115	14.0994091	14.31984997	E7EN96;E9PGW7;Q15528;Q5T8T7;Q5T8T8	MED22
15.02768517	15.12346649	14.18875122	13.98679829	14.59233379	14.47506237	14.58772659	14.1531744	13.3905611	14.29291248	E7ENL6;P12111	COL6A3
14.98432446	14.6891346	14.59389591	14.62566376	14.86948299	14.33259678	14.63070297	14.2963686	15.02576351	14.5063076	E7ENR5;H0Y714;Q96G21	IMP4
11.6835804	10.53608799	12.56669998	12.04738522	12.5461607	12.39278507	11.90836334	12.53645611	12.56434822	12.38299179	E7ENV7;Q86YQ8;Q8IYJ1;Q9HCH3	CPNE8;CPNE8;CPNE9;CPNE5
13.99225807	14.29255199	13.53582859	12.77673149	13.63922691	14.00459385	14.0744524	14.19556046	12.84922504	13.98694324	E7EP72;Q9UFG5	C19orf25
20.46278763	20.20879364	19.47564507	19.62475204	19.6551342	19.56763649	19.92601204	19.70908165	19.79627419	19.63563919	E7EPB3;P50914	RPL14
16.71844864	16.7478714	16.6041069	16.57257843	16.45134544	16.5592308	16.60453606	16.83166885	16.66373825	16.6065979	E7EPM6;P33121	ACSL1
16.2758522	16.31584358	16.13939667	16.05583572	16.14141464	16.17616272	16.48629761	16.2267437	16.19522858	16.15761185	E7EPN9;Q9Y520	PRRC2C
13.8779726	13.81089973	13.9461689	13.51377296	13.63365841	13.70549583	14.15085316	13.52388287	13.92118073	13.5922184	E7EPP6;O14757	CHEK1
11.40470028	11.70975018	11.53937721	9.143684387	11.2235384	10.32844448	11.44964123	10.89473152	10.80452156	10.66192055	E7EPS8;P28827	PTPRM
15.74303055	14.76550484	15.96308136	14.56163025	15.87706757	15.03263092	15.82594872	15.04065704	16.06929016	15.05824852	E7EPT4;P19404	NDUFV2
14.7065134	15.03330898	14.78483486	14.6194315	14.91966724	14.76654816	14.98490906	14.94808102	14.88858318	14.9260807	E7EPX0;E7EVJ4;Q9NUL3	STAU2
17.01811218	16.74749565	16.17515373	16.48893166	16.72976303	16.54862785	17.20728493	16.41458321	16.0796299	16.4950161	E7EQ64;P07477	PRSS1
16.21411705	16.06201935	16.07244492	16.17315674	16.18722534	15.95959854	16.12092972	16.03310776	16.1756134	16.04051208	E7EQ69	NAA50
14.45282173	14.34864426	14.87581253	15.05901718	14.94353867	14.01706982	13.41386127	14.75656223	14.55483723	14.9325943	E7EQ72;F5GX39;Q15363	TMED2
16.42189026	16.49700928	16.71998024	17.11091042	15.9201355	16.18999481	15.86083412	15.89608288	16.41638947	16.61789513	E7EQB2;E7ER44;P02788;TRFL_HUMAN	LTF;LTF;LTF;
16.667099	16.44064522	16.46494102	15.77690506	16.51891708	16.28357697	16.0620575	16.30699158	16.41807365	16.23994637	E7EQI7;Q12768	WASHC5
13.43595886	13.52431393	12.90108395	13.08127117	13.18201065	13.2951746	13.41208267	13.23049927	12.89126015	13.06566811	E7EQL5	DYNC1I2
18.69574547	18.75311279	18.51922035	18.58626556	18.56593132	18.48160172	18.61975861	18.56783295	18.28059578	18.57432365	E7EQR4;P15311	EZR
14.82317638	14.97919464	15.00928974	14.89534855	14.89956951	14.89483261	14.64576912	14.83267879	14.86924171	14.73736572	E7EQY4;E7EV10;Q9BTC8	MTA3
12.01522541	10.81414795	11.63902664	11.15630341	12.61278248	9.917284012	10.5695715	11.13173676	11.93665028	12.03023815	E7ER77;Q7Z2K6	ERMP1
14.18238831	14.41206837	13.95580101	14.00567818	14.07910538	14.42626762	14.17135811	14.20601654	13.86686611	14.16367817	E7ERS3;Q86VM9	ZC3H18
16.88176155	17.05934906	16.8771019	16.89197731	16.9555912	17.0499897	16.97265816	16.91471481	16.98313522	16.92815399	E7ES10;P20810	CAST
14.78818512	14.68465233	14.76138592	14.75594425	14.84932613	14.66367531	14.5630827	14.84320927	14.84882545	14.87559319	E7ESC6;Q9UIA9	XPO7
11.28178024	12.29649353	10.72916508	10.67716408	11.52189922	12.79845905	12.51667118	11.49041939	11.14083004	12.15114975	E7ESJ7;Q9NRY5	FAM114A2
13.59694672	13.05164146	13.21572685	12.2101059	13.49376583	13.05348492	12.616539	13.18030071	13.22986889	12.35876942	E7ESK6;E9PBI9;P34741	SDC2
14.81335926	14.82370853	15.29916191	14.78616333	15.3067255	15.04058743	14.47861099	15.06529999	15.35165691	15.06821156	E7ESL0;J3KQY1;Q9NWU5	MRPL22
13.39199162	12.9302969	13.19472599	12.80289364	12.82335567	13.08789635	12.90829945	13.07808018	12.99080658	12.96345043	E7ESY4;Q13330	MTA1
13.93523312	14.29887295	13.62587929	13.48806572	13.55853081	13.97087574	13.43363762	14.12916374	13.84067535	14.13053894	E7ET40;P00749	PLAU
14.86545372	14.74961472	14.82057571	14.79788494	14.89756775	14.76795673	14.49693489	14.80017281	14.87196732	14.67615032	E7ETU7;H0Y9G6;P09001	MRPL3
15.35002327	16.04182434	15.27179432	15.84362507	15.28413963	16.12140465	15.07131386	16.10031509	15.08807659	15.82673836	E7ETU9	PLOD2
11.90593338	12.75473213	12.82945156	13.27268124	12.78422642	13.32089901	12.15700626	12.40314674	13.87607288	12.91080856	E7ETY2	TCOF1
15.50443459	15.67123699	15.75377083	15.58894634	15.67078686	15.65540123	15.81804085	15.4232378	15.55869389	15.80647278	E7ETZ4;Q9Y6E2	BZW2
14.22295666	14.49634457	14.30621719	14.21878433	14.2126112	14.29463863	14.41541862	14.27085114	14.56211948	14.33289051	E7EUH7;Q96PZ0	PUS7
11.6578083	12.32542992	12.59020519	12.00721741	12.33840466	12.57457256	12.59867573	12.27471733	12.39024734	12.01884747	E7EUN9;Q9NX74	DUS2
18.36844444	18.28762627	18.36149216	18.42110825	18.36407852	18.428442	18.57470512	18.4282608	18.44844818	18.50252533	E7EUU4	EIF4G1
18.62219429	18.65320015	18.61183739	18.51556015	18.66722679	18.8248539	18.95240211	18.65231705	18.60913467	18.67621613	E7EVA0	MAP4
13.37848568	12.5072937	12.32637882	12.13456154	12.71174431	12.00473118	11.95866203	12.60228729	12.18328571	12.41030979	E7EVC7;Q676U5	ATG16L1
14.01067066	14.00903225	13.85235023	13.78706455	13.87088966	13.94371986	14.02568245	13.80674744	13.93930531	13.87943935	E7EVG2;H0Y5B5;Q86U86	PBRM1
13.94037724	13.76761627	13.94360447	13.73895359	13.93999195	13.44297695	13.71868038	13.65257645	13.79783154	13.52857494	E7EVH3;Q92576	PHF3
10.42794895	10.96683502	12.09795952	11.84121895	12.09348297	12.37690926	11.51557446	12.11908913	12.45223522	12.21932888	E7EVZ5;Q8NBM8	PCYOX1L
14.33759117	14.33332634	14.3021307	13.97532558	14.19373608	13.97976112	14.33695793	14.17301846	14.33681202	14.01167297	E7EW05;Q9NVU7	SDAD1
13.16002274	12.23315239	13.11749649	12.85907364	13.03163147	13.11686039	13.25024986	12.79283714	13.31549168	13.1122303	E7EWE8;Q8WUP2	FBLIM1
14.60373974	14.19967365	14.502985	14.2371273	14.46487617	14.06166172	14.03825855	14.54067039	14.4800148	14.29290676	E7EWP0;H0Y886;O43674	NDUFB5
17.34065437	17.4711895	17.39964485	17.30781364	17.39112282	17.48502159	17.64897346	17.24268341	17.37996864	17.35044098	E7EX17;P23588	EIF4B
13.22638893	13.49674129	13.20703602	13.13543224	13.12471962	13.16656971	13.21836948	13.20583248	12.87185287	13.21925926	E7EXA6;Q8WVB6	CHTF18
13.87460804	14.19190884	12.89353275	12.85404587	12.4893198	13.87876129	12.88759327	12.97572803	12.33340359	12.80267811	E9PB61	ALYREF
15.03123093	15.33502769	14.96284103	14.93525028	14.75557709	15.35093307	14.97737026	14.53939724	14.67813015	14.93264675	E9PB93;E9PHV4;O15514	POLR2D
13.91710567	14.28066254	13.68593407	13.42469692	13.66747665	13.90188503	14.0247488	14.05711555	13.5548439	13.93497181	E9PBC1;F6PQP6;I3L2B2;O95208	EPN2
18.39387512	18.51457214	18.35482597	18.46399689	18.36628914	18.49179649	18.32148361	18.29776764	18.47756767	18.33102608	E9PC52;Q16576	RBBP7
12.13159847	11.52788353	11.62299538	10.87577915	10.83592606	11.51304436	11.20833015	11.40815926	10.23836613	11.4987011	E9PCD7;H0YA68;Q9Y2E5	MAN2B2
17.43365288	17.42412949	17.29998016	17.19796371	17.30447388	17.25981522	17.21323967	17.41323853	17.18204308	17.19114685	E9PCR7;E9PDF2;Q02218	OGDH
15.57848072	15.66645622	15.40936947	15.39533138	15.37776947	15.49582958	15.53912926	15.47489548	15.45490837	15.38225079	E9PCW1	GOSR1
16.76010513	16.61432076	16.65351868	16.60461807	16.64464188	16.62639809	16.6697197	16.5335598	16.56132317	16.54209518	E9PD53;Q9NTJ3	SMC4
15.81195068	15.8417511	15.96170902	15.83148956	15.96310043	16.03739548	15.83570957	16.10731697	16.07587433	15.98989391	E9PDF6;O43795	MYO1B
15.25121117	14.70004463	15.488657	15.10337353	15.5757494	15.47004604	15.50984573	14.93831444	15.54821301	15.04721832	E9PE17;I3L0E3;Q9Y2R5	MRPS17;hCG_1984214;MRPS17
12.78341007	12.6949482	13.05580807	12.14647579	12.57052231	12.85770035	12.75570965	13.16752243	13.17836952	12.52581024	E9PE82;P16219	ACADS
17.43188477	17.38346672	17.33316994	17.19813919	17.34056473	17.32789993	17.37850761	17.19069481	17.14055824	17.22164726	E9PEB5;Q96AE4	FUBP1
15.20004749	15.01124001	15.1740284	14.76228523	15.20612812	14.84089565	15.00356007	14.72289658	15.11271095	14.92732716	E9PEP6;O14786	NRP1
13.07521725	13.37839222	13.37361717	12.43216038	13.28615379	13.42618561	13.60117435	12.99501038	13.34392166	13.28775024	E9PEP7;P08048;P17010	ZFX;ZFY;ZFX
17.67288589	17.47924614	17.69702911	17.50445175	17.68121529	17.68438911	17.51171494	17.59572792	17.54702759	17.5394783	E9PEX6;P09622	DLD
17.58275986	17.56915855	17.76125526	17.77523041	17.69036674	17.84628868	17.65105438	17.86231613	17.81692505	17.82828522	E9PF10;O75694	NUP155
13.17543411	13.37280464	13.42850971	12.81210232	13.26707458	13.08747196	13.20963001	13.16466331	13.04430199	12.82269001	E9PF16;Q96CM8	ACSF2
12.1512413	16.02682114	16.4029026	16.0720787	16.38112259	13.82448769	13.49285316	12.81983662	17.01521683	16.35370636	E9PF17;P13611	VCAN
13.97184849	14.15659523	14.13868523	14.18917465	14.15219402	14.15908051	14.00381088	14.13712788	14.2820425	14.02665901	E9PF19;Q9Y4P3	TBL2
12.56794167	10.37572002	12.23614693	10.93076515	11.59040165	11.81481934	10.06382084	12.01709652	12.18114185	11.39565945	E9PFH1;P61587	RND3
13.67619038	13.52499676	13.29521656	12.92379379	13.30192089	12.95526409	13.21740818	13.0577774	13.36803722	12.89050865	E9PFK9;Q9UJ41	RABGEF1
14.04754448	14.26432228	13.53440094	13.42294312	13.52741432	13.74853706	13.91539478	13.28260136	12.87100792	13.51873493	E9PFP1;O00459	PIK3R2
13.69924545	14.1306982	13.76569176	13.47798443	13.60332489	13.32488346	13.75581264	13.80909348	13.79105282	13.88767338	E9PFQ4;Q86SQ0	PHLDB2
18.92959023	18.9823246	18.88736343	18.88656044	18.89784241	18.90144348	18.93835831	18.75591278	18.64711952	18.84068489	E9PFR3;Q14738	PPP2R5D
17.11278534	16.98143959	17.21387672	17.21505356	17.25091934	17.02599525	16.72648811	17.19080734	17.10364151	17.1000061	E9PFW3;Q96CW1	AP2M1
14.38277817	14.09558773	14.06925964	13.49710941	14.02441311	14.1595993	14.19789219	13.80616093	13.79307652	13.94943523	E9PG22;Q8IW35	CEP97
14.66257572	14.57491779	14.48461628	14.48394394	14.65273952	14.67759037	14.60175133	14.61806488	14.46880436	14.65733242	E9PGC0;P20936	RASA1
12.26791096	11.57225704	11.75166225	9.565793991	11.3172884	10.32982063	9.628716469	11.97624302	11.74020004	11.61208344	E9PGC5;Q15262;Q5TG12	PTPRK
14.28521156	14.7783947	14.43883419	14.35691261	14.33207035	14.38371658	13.95730782	14.51148987	14.3354044	14.21726227	E9PGM9;P78332	RBM6
15.06208992	14.90643024	15.31163788	15.34102058	15.50223255	14.86772442	15.01034546	15.12409878	15.55460358	15.30083847	E9PGT1;Q15631	TSN
14.34493637	14.49584866	14.55081177	14.7907629	14.69876766	14.51673794	14.30799007	14.45257092	14.42773056	14.68746567	E9PGT3;Q15418	RPS6KA1
16.56611252	16.66030502	16.39074898	16.36770248	16.29490471	16.58487129	16.61843491	16.42916107	16.04589081	16.30691528	E9PGT6;Q99627	COPS8
13.01635361	13.05467415	12.15439987	12.81237411	12.13483238	11.93102932	11.97971916	12.75978088	12.9084034	11.02406597	E9PGZ1	CALD1
15.10300446	14.94258595	15.63062954	14.98320007	15.4512558	15.07572365	15.15098763	14.89941883	15.57455349	14.8946743	E9PH64;Q9Y6M9	NDUFB9
13.84410191	13.53270054	13.86807728	13.25248241	14.04774475	13.46817303	13.73768425	13.68109608	13.84321213	13.71125603	E9PHF7;F5GYT8;Q96RQ3	MCCC1
11.1876421	11.56801605	11.10485458	11.56595135	11.58887768	10.00185013	8.970094681	11.48122215	11.18611622	11.37217236	E9PHG5;Q6UW02	CYP20A1
12.49566364	11.91580105	13.42284775	12.69511604	13.15677834	13.14832878	13.35578442	13.2536726	13.46018314	13.25122643	E9PHH9;Q9BUI4	POLR3C
14.9859724	15.23679066	15.17602158	15.21284008	15.10311222	15.416749	15.01990223	15.57618999	15.17742157	15.32012463	E9PHI4;O94901	SUN1
13.79254818	14.16435623	14.0019989	13.87143612	13.94990349	14.23678207	13.97239399	14.17622757	13.95271873	13.80544853	E9PHV5;P28290	ITPRID2
13.74296379	14.69067574	12.99150753	13.68011284	13.62300873	14.52200985	14.21191311	13.59723568	13.48426056	12.9395895	E9PIC2;E9PJV6;P56962	STX17
12.51702881	12.46646118	12.51766968	12.19169617	12.81790924	10.32513428	11.0669117	12.38428402	11.8629446	12.1204586	E9PIH9;F8WA39;H0YDX3;Q13613;Q8NEC6	MTMR1
16.87470055	16.81222343	16.79751587	16.91024017	16.89813232	16.91960335	16.99399757	16.71289444	17.03347206	16.84974861	E9PIM0;J3KN20;Q9NS37	CREBZF
14.93971348	14.95774269	14.15768909	14.49980736	14.63031483	14.66409111	14.59082413	14.58455181	14.59669304	14.64993382	E9PJ42;Q5BJD5	TMEM41B
16.21578026	16.16949272	16.30386162	16.39946175	16.31135368	16.63393402	16.27116776	16.38323593	16.27715492	16.3625927	E9PJH7;Q9H936	SLC25A22
14.08547497	14.04588509	14.1751442	13.85033894	13.9217329	14.68390656	14.18411064	13.93232059	14.08961201	13.97026539	E9PJN0;H7C5A7;O14734	ACOT8
13.74540329	13.42364502	13.31287956	12.81786156	12.71905708	12.28079414	13.19968224	12.93748379	12.90241718	12.43451023	E9PJP1;E9PLK9;E9PR47;K4DI89;Q9H7C9	AAMDC
20.87926674	20.97904968	20.75493431	20.88338661	20.79355431	20.9013443	21.03896332	20.85625648	20.81082726	20.99541855	E9PK01;P29692	EEF1D
14.06222916	13.78633022	13.58485889	13.46014214	13.58006191	13.1967535	13.55906487	13.14636898	13.57315445	13.54586124	E9PK26;E9PMW6;Q9NRS6	SNX15
17.01579285	17.02796745	16.39360809	16.66310692	16.82419586	16.63885689	17.30228424	17.20980835	16.56861115	16.74025726	E9PK41;H0YEB6;H0YEK1;O60232	ZNRD2
14.93314838	14.7555027	14.89258862	14.89074135	14.89825344	14.88886166	14.91436577	14.73123455	14.94565105	14.76431751	E9PK59;E9PS17;Q96KG9	SCYL1
12.42015553	12.55153656	12.99318027	12.94999599	12.92554665	12.58340931	12.06878757	13.07162285	13.23379803	12.88548946	E9PK80;E9PM75;E9PN58;Q9NTG7	SIRT3
12.36649513	12.81491947	12.62384033	12.65053654	12.47379112	11.53659344	11.80467224	12.85263252	12.59083366	12.09969521	E9PK91	BCLAF1
12.1657505	10.29255104	12.35752964	11.26096535	12.5050869	11.23956585	12.15097427	11.36060715	12.33724976	11.69918346	E9PKC0;Q6IQ23	PLEKHA7
13.83431339	13.95114899	14.2307272	13.92450809	14.27486038	13.46649361	13.05245781	14.18822193	14.2730608	14.17911434	E9PKF6;H7BXH2;Q5H9R7	PPP6R3
17.05547333	16.88070297	17.45446014	17.43903542	17.42346382	17.10599709	16.95037079	17.03710747	17.65955353	17.26548386	E9PKG1;Q99873	PRMT1
15.8148489	15.82900333	15.71255589	15.59869003	15.62417603	15.40453625	15.52072239	15.77566719	15.71898365	15.64857388	E9PKP7;P17480	UBTF
17.08732224	17.38924217	16.77837181	17.11532402	16.82890511	17.09960747	16.87085152	17.23941994	15.59762192	17.09846115	E9PKT4;Q8N131	TMEM123
7.052382946	6.858193398	1.683869243	7.500412464	6.274366379	7.351926327	7.280936718	6.666184902	8.506340981	6.871727943	E9PKU7	GANAB
18.41013336	18.4534626	18.09306908	18.08453369	17.77108192	18.29457664	18.11392975	18.05054474	18.05147362	18.00948524	E9PKY5;Q9UNP9	PPIE
14.02506447	13.01436615	13.31685638	12.40319729	12.89054394	13.02767563	12.72587776	12.81546021	12.66038895	12.5562582	E9PL17;Q92989	CLP1
14.3445282	14.25725365	14.04345798	14.09932804	14.00309563	13.78779602	14.1410923	13.87069607	13.8412571	13.91682816	E9PL57	NEDD8-MDP1
17.02951241	17.25538635	16.7723999	15.12209892	16.66279411	16.85621452	17.05639839	16.49457741	16.80003929	16.42891502	E9PL71	EEF1D
15.10831451	15.15388489	14.75134182	14.64053249	14.73101044	15.12717342	15.02341652	14.91681385	14.51351833	14.80523968	E9PLE4;E9PS47;Q9BVG9	PTDSS2
14.95382977	14.4566946	14.51296043	14.03874302	14.16232109	14.47875595	14.37244892	14.56980991	14.60260582	14.44576168	E9PLI6;E9PS30;E9PS76;Q8N9N8	EIF1AD
12.54927826	12.3292017	12.29380322	11.83436489	12.43847656	12.96800041	12.55838299	12.3717308	12.3584156	12.60326672	E9PLJ7;F6XC58;Q5T1C6	THEM4
19.78792763	19.78581238	19.73117256	19.80034637	19.74459267	19.77563286	19.73642731	19.68590736	19.61491776	19.70367432	E9PLK3;P55786	NPEPPS
14.38209343	14.29252529	13.86427879	13.74972725	14.02056789	14.28914547	14.12778091	13.65669632	13.9246397	13.97777176	E9PLP0	CARS1
10.00363731	12.90885925	12.89871216	12.39803314	12.95706367	12.87316608	12.53911686	12.30387783	12.93760586	12.96164131	E9PLS4;E9PMM3;E9PP98;Q9Y5Y5	PEX16
15.13204765	14.96774673	15.26365089	15.31647491	15.27961922	15.38156509	15.00348473	15.04235077	15.28141975	15.0137949	E9PLV6;E9PPZ9;O43292	GPAA1
16.41675758	16.27701187	15.48328781	15.50468636	15.43235016	15.30368137	15.28990936	15.83232021	14.9817276	15.51754189	E9PLY5	MACF1
16.05729675	16.0343895	16.08325005	16.20380783	16.05716896	15.97360039	16.00341988	15.97280884	16.18441963	16.01324463	E9PM04;Q9BTE7	DCUN1D5
12.83593178	12.71603298	13.04348183	12.54330444	12.85813713	13.10509109	12.48985291	12.81471825	13.02985001	12.85213089	E9PM12;E9PMC5;Q13488	TCIRG1
15.53147125	15.70921898	15.46916771	15.54468536	15.46306324	15.62105465	15.80599403	15.31293392	15.29251194	15.54430294	E9PM92;E9PRZ9;O00193	C11orf58;C11orf58;SMAP
12.93531799	13.3540926	13.50478363	13.35968018	13.38933563	12.72442436	13.22811127	13.25225163	13.29073143	13.33720779	E9PMG4;Q9BUR4	WRAP53
17.08166504	17.11776924	16.72090721	16.75566673	16.90056992	17.08847618	17.31829262	16.73080635	17.08353233	16.80724335	E9PMI6;J3KN38;P54105	CLNS1A
17.02304268	17.06287766	16.88358688	16.69488716	16.76667023	16.81912231	16.99481773	16.93126297	16.75983429	16.84747696	E9PMP7	LMO7
13.6624155	13.66645527	13.62660599	13.60570431	13.65274143	13.0042181	13.66738987	13.64425755	13.62940502	13.08666897	E9PMQ6;Q00613	HSF1
13.08778	13.33256435	13.19932652	13.00927925	13.13604641	13.26600933	13.38483524	13.44726849	12.96779156	13.32360935	E9PMR6;Q9NZN5	ARHGEF12
9.224310875	10.70355225	12.34479523	10.82662296	12.22288704	11.86634254	10.38101959	12.59999275	12.76428413	12.12585545	E9PMT1;P49662	CASP4
14.87968731	15.11623478	14.53471088	14.72848511	14.58166027	14.86760712	14.80859756	14.56084061	14.57999134	14.46114826	E9PN81;Q8TDP1	RNASEH2C
15.28776836	15.38493729	15.11622047	15.0634861	14.97591782	15.27411652	15.41138172	15.07548428	14.92051506	15.02334023	E9PN89	HSPA8
14.5745554	14.42464638	14.64387703	14.43439579	14.54544735	14.46266842	14.64940166	14.03313923	14.42101669	13.72663403	E9PNF7;P42785	PRCP
16.97500801	17.21874046	17.04564476	17.20721817	17.01610756	17.29776192	17.22720909	17.11058998	16.97229004	17.2390728	E9PP21;P21291	CSRP1
14.22816849	13.58079243	14.43189049	13.92258644	14.18731785	12.68496227	13.6834116	13.66308594	14.58147621	13.59386444	E9PPW7;O00217	NDUFS8
16.17745018	15.79330826	15.3043108	15.38525295	15.46619415	15.60163593	15.77785397	15.31383038	15.15916157	15.28424358	E9PQA6;Q96EY5	MVB12A
13.77391243	13.51631355	13.78390694	13.65077305	13.62949753	13.61717892	13.50531101	13.47274971	13.65441799	13.57425499	E9PQC4;Q9BZD4	NUF2
12.36088562	12.84039021	13.23025608	13.03540611	13.44779968	13.39239979	12.96226025	12.92814541	13.66310596	13.26242161	E9PQP6;P49354	FNTA
16.23646545	16.1193924	15.96960926	15.9714365	16.1162262	16.07921982	16.23749161	15.91224098	16.02903366	16.1579361	E9PQY2;Q9NQP4	PFDN4
18.77202034	18.87953568	18.22748375	18.30802155	18.39212799	18.20145798	18.41512108	18.33404732	18.14881134	18.18407249	E9PR30;P62861	FAU
16.37162209	16.25213051	16.23046112	15.85109234	16.19188499	16.00363541	16.39704895	16.07327652	16.44894791	16.03014565	E9PRG8	C11orf98
16.58606529	16.67204666	16.36026955	16.28372765	16.44380569	16.4362278	16.67079735	16.26775742	16.27949715	16.39813614	E9PRQ7;Q04323	UBXN1
13.67408276	13.59954262	13.16762733	13.50159454	13.37896156	13.47790527	13.27357674	13.36101437	13.22865582	13.42156219	E9PS00;Q9Y5Q0	FADS3
12.48846149	12.64548779	11.75672245	12.5184288	11.77864933	12.90158367	12.17483807	12.14230156	10.49687386	10.74206543	E9PS62;Q9BZ67	FRMD8
14.6693573	14.71295452	15.09548855	15.3073101	15.06492519	15.33403015	14.62708855	15.28038883	15.16034603	15.15670395	E9PS74;Q8NBI5	SLC43A3
11.50908947	13.22964954	6.018349648	8.184985161	8.5890131	10.35401058	11.4330368	10.24145603	11.12696075	10.44699287	E9PSG1	CAST
13.72122002	14.20281887	13.59617329	13.89334297	13.77990818	13.79528522	13.57901764	13.91730595	14.08567619	13.98511314	E9PSI1
12.5299015	12.46737194	12.046978	11.0106926	11.49619102	11.34968281	12.05410957	12.12462044	10.17249584	11.40548801	F2Z2U4;H0Y4W2;Q9Y4A5	TRRAP
14.35600376	14.30836391	13.92785072	13.8775301	13.96181107	11.39613152	12.71576023	13.88714504	13.94379807	13.96470642	F2Z2W7;Q8IZ69	TRMT2A
15.21718693	15.40056705	15.67567253	15.51398277	15.57948112	15.60027981	15.48947525	15.53512096	15.44414425	15.53375912	F2Z2Y8;Q9H0E2	TOLLIP
14.38259029	14.15418816	14.38586998	14.23851681	13.841259	14.32996082	14.42331314	14.27054214	13.88628006	14.1471386	F2Z3E0;Q5JS54	PSMG4
14.8182106	14.8566246	14.38289928	14.25423908	14.35432053	14.81066513	14.69224358	14.70481014	14.57284927	14.62341309	F2Z3H6;F8WDZ4;F8WE18;I3L1Q2;I3L4D5;Q4VC05;Q8WUZ0;Q9BQE9	BCL7B;BCL7B;BCL7B;BCL7C;BCL7C;BCL7A;BCL7C;BCL7B
13.59374237	13.23724937	13.56488228	13.30261421	13.73512459	13.44085312	13.37211323	13.33171654	13.72797489	13.63758659	F2Z3J9;Q14914	PTGR1
13.4275589	13.34046078	13.25993824	13.4759798	13.50330639	13.78397465	13.8368721	13.59976959	13.0798521	13.73224163	F5GWE5;Q00169	PITPNA
13.75425148	14.16747761	13.77556229	13.5451231	13.74102592	13.76999569	13.80010891	14.50001431	13.82378292	13.88659191	F5GWH5;P61165	TMEM258
14.95735836	14.78358269	14.16505432	13.93789101	14.24032307	14.69959736	14.71097946	14.28296471	14.12421417	14.46206856	F5GWI9;F5GXZ7;F5GZ97;Q9Y3C0	WASHC3
13.53519726	13.27886963	12.91196918	12.03570747	12.53974247	12.87383366	13.28587341	13.18196106	11.79285145	13.10683155	F5GWN1;J3KRP6;J3KT74;J3QQM2;J3QQW2;J3QS72;Q15532;X6R3J2	SS18
16.18142319	16.25294876	16.31875038	16.3127594	16.2630806	16.31995392	16.46884537	16.0854187	16.41993713	16.35601807	F5GX23;F5H5V4;J3KN29;O00233	PSMD9
16.03656387	15.67637825	15.32851219	15.26146317	15.37980556	15.20185661	15.82156372	15.54962254	14.5031271	15.14014435	F5GX77;Q9UI30	TRMT112
14.95545769	14.44378757	14.89694881	14.52410412	14.80393028	13.2609663	13.17256069	14.24389839	14.031991	13.91584969	F5GXE4;O95260	ATE1
15.60158157	14.73196888	15.37986183	14.58361244	15.22430229	14.32717896	15.26593208	14.62132549	15.12944508	14.64392185	F5GXJ1;F5H5N1;O75251	NDUFS7
16.71310806	16.54684258	16.08339119	16.1351757	16.15889359	16.08346176	16.63994598	16.15893745	15.89526272	16.04247856	F5GXR3;P20962	PTMS
13.65267658	14.15867901	13.74327564	14.06924152	13.41725063	13.74899197	13.73951244	14.54626083	13.63097763	13.24352741	F5GXS2	ACTN4
13.70612907	11.73785782	11.91573429	11.71188736	12.1473484	12.37681293	11.96031857	12.48825932	12.40787506	12.65256596	F5GXW1;H0Y599;Q8N1I0	DOCK4
15.5327673	15.75905609	15.97561932	16.0062561	15.99753475	16.04256821	15.87087345	16.66424179	16.12242889	15.97210312	F5GXX5;P61803	DAD1
15.28611183	14.91364098	14.79563427	14.83154011	14.90924168	14.63801384	14.95135403	14.79731941	14.68973732	14.74982262	F5GYG5;H0YGR4;Q9Y3B8	REXO2
14.17151737	15.40487862	13.77612019	14.76367855	14.03310108	13.75414848	12.49975681	15.1958828	13.57425213	14.9993391	F5GYJ5;Q9NX18	SDHAF2
15.5880928	15.31132317	15.52173233	15.73495674	15.72805405	14.63561058	14.9410038	15.46841621	15.89671898	15.70657253	F5GYN4;J3KR44;Q96FW1	OTUB1
16.43308449	16.50764084	16.50430489	15.93292809	16.38531494	16.30481529	16.27633476	16.5118866	16.26277542	15.96763992	F5GYQ1;P61421;R4GN72	ATP6V0D1
11.04156113	13.26486588	14.3441	13.9616003	13.63898182	13.32166767	13.37300301	14.14895535	13.47747135	14.27069187	F5GZZ6;F5H5T2;F8VWA9;F8VXJ0;Q5BKT4;Q5I7T1	ALG10;ALG10;ALG10B;ALG10B;ALG10;ALG10B
14.95878124	14.97767639	14.37217236	14.51948833	14.57571697	14.66761398	15.08412552	14.71336746	14.5894556	14.77970505	F5H039;G3V582;H0YJ30;Q9NQX3	GPHN
12.99148464	12.00896072	12.62564087	12.5049305	12.4074173	11.47975636	11.61345863	12.45959663	11.55114079	12.54301262	F5H0F9;Q9UJX4	ANAPC5
13.82475471	14.48974609	13.82024384	14.46850204	13.89902306	14.38300896	14.13623142	14.18408298	14.04536819	14.49763203	F5H0U5;Q9NZD2	GLTP
13.23990917	13.37077522	12.82435322	12.96309757	13.17429543	13.30002213	13.15812683	13.03101444	12.82035255	12.90247059	F5H1S9;G8JLB3;Q9Y606	PUS1
11.62856674	10.47722149	11.01544189	10.59565449	11.27812099	11.42495537	11.10455799	11.62944317	11.01478958	11.70553398	F5H1U9;O75970	MPDZ
14.03879738	13.67595482	13.66302109	13.34933758	13.72899055	13.71544838	13.6739769	13.48664856	13.77121544	13.36821365	F5H1Y4;Q9HD26	GOPC
13.63623238	13.85077953	13.29592705	13.5789032	13.29267979	12.64888763	12.35945034	13.50461197	13.36922073	13.09006214	F5H225;Q5NDL2	EOGT
15.19005394	14.7140522	15.05049324	15.13712502	15.10965061	14.71673489	15.08843613	14.75460148	15.4820118	15.29558182	F5H2A4;F5H2U8;P52926	HMGA2
10.2335043	12.75563812	12.62694073	11.97185326	12.87001228	12.93835258	12.8305521	12.64090824	12.61063766	12.18532276	F5H2C9;Q86UY6	NAA40
18.45373154	18.38957024	18.3189373	18.31285667	18.3621769	18.38981819	18.46749115	18.26877594	18.32180595	18.36655807	F5H2F4;P11586;V9GYY3	MTHFD1
15.65212154	15.5212307	15.77802944	15.70784664	15.72919369	15.61443043	15.4162178	15.56510258	15.74090862	15.56888485	F5H365;Q15436	SEC23A
16.31027603	16.35169792	15.97572231	16.06702423	16.01015663	16.07835579	16.15893745	16.11649895	15.87603474	16.04452705	F5H4B6;Q8IZ83	ALDH16A1
19.41131973	19.49276161	19.57753181	19.52587509	19.53908157	19.58204842	19.65615082	19.49770737	19.58673668	19.61127853	F5H4R6;F8VY35;F8W0J6;H0YIV4;P55209	NAP1L1
10.87516117	11.38773727	10.96330833	10.82820988	11.04934502	10.40300465	10.66005516	10.88734436	10.91916656	10.65466118	F5H5A3;Q8IVH8	MAP4K3
23.20498085	23.05582809	23.09314156	23.25811768	23.21513557	22.95667458	23.11606407	22.97858429	23.06645393	23.10302925	F5H5D3;Q9BQE3	TUBA1C
17.14188576	17.09695625	16.95350647	16.88735771	16.92650795	16.96717453	17.05481339	16.90181541	16.94404984	16.92952728	F5H5I6;Q12849	GRSF1
12.80890179	13.19075871	13.72782993	12.75220776	13.31730175	13.31627941	12.77352524	13.01934814	13.09593582	12.73684406	F5H5P2;P12694	;BCKDHA
13.67033768	13.65604973	13.7555666	13.13826275	13.42722416	12.75555134	12.97074223	13.57080364	13.48688507	13.39439583	F5H5U2;Q8NHQ9	DDX55
17.82080841	17.67625999	17.83553123	17.80417824	17.92036819	17.82188606	17.73133469	17.94161224	17.8564415	17.78056908	F5H6E2;O00159	MYO1C
11.4672842	11.32735062	13.21688461	12.53906345	13.30421066	13.65116119	13.00338078	13.27695751	13.74222183	13.01904106	F5H6I7	ATL3
12.15528202	11.48828983	10.90097618	11.45677185	11.97364998	10.15945148	8.630636215	11.59858036	12.08497047	11.58250809	F5H6T0;Q8TB40	ABHD4
14.35689449	14.39276791	14.56101418	14.31422806	14.61179352	14.36146927	14.1800642	14.59730816	14.60602474	14.45370579	F5H702;Q96GC5	MRPL48
13.96801281	14.50293159	13.72122192	13.5848608	13.85036564	13.3524456	13.49733639	13.74474144	13.59696293	13.73360443	F5H7P7;Q96BP3	PPWD1
14.07206631	14.1492281	13.85482216	13.89854622	13.82440376	13.87168407	13.88050556	13.96682453	13.64516163	13.87061214	F5H7W8;Q96C57	C12orf43;CUSTOS
14.96332455	15.01867771	14.85943699	14.64465714	14.75072765	14.76698685	14.80919075	14.65397072	14.85943985	14.37461853	F5H8D7;P18887	XRCC1
14.89258099	15.01784897	14.9541111	14.89553547	15.11455917	14.91080284	14.84151936	15.30238056	15.17409134	14.88529968	F5H8F7;Q9UBL3	ASH2L
13.95191002	14.7794733	12.00459957	13.89135551	13.37112617	14.77714729	15.0468235	14.07180309	12.82724667	11.86234665	F6QDS0;Q9UMR2	hCG_2043426;DDX19B
18.68153381	18.49237823	18.18628502	18.16555977	18.15768623	18.13129044	18.50473022	18.16798782	16.41504097	17.81108284	F6RFD5;P60981	DSTN
16.57732582	16.45212173	16.74734497	16.5166378	16.52227783	16.43245697	16.26964188	16.26895905	16.19616508	16.24608612	F6RY50;Q96FS4	SIPA1
11.04568768	11.44392014	12.25572968	11.20738983	12.36650848	12.40956497	10.88051891	11.32885456	11.18477058	10.5365181	F6SFZ6;Q99571	P2RX4
13.47685623	14.05744076	13.42016983	13.41688251	13.27905846	14.05714798	13.35552788	13.8663063	13.40158844	13.70383739	F6XHT0;F8WAX7;Q9Y6D0	SELENOK
14.18322754	14.33551693	14.04605389	13.95422745	14.05258656	13.12971973	13.08481407	13.73333645	13.14730263	13.64702797	F8VNY5;Q9P031	CCDC59
18.16283989	17.97978592	18.10843658	18.04185104	18.19500351	18.20141411	18.2302475	18.10589409	18.17702293	18.06155586	F8VPD4;P27708	CAD
13.47641754	14.05748177	14.37918854	14.85521889	14.19590855	14.84606552	14.49939442	14.79768276	14.77519798	14.85416985	F8VPI1;F8VQQ5;F8VQW0;F8VR05;F8VSI7;F8VVJ4;F8VX73;F8W086;F8W1G3;F8W201;P55061	TMBIM6
13.52470303	13.8351593	13.71056938	13.33149624	13.48571777	12.88411522	12.91869926	13.50861549	13.59205055	13.14237785	F8VPW2;H0YI74;H0YIK0;Q8IUH5	ZDHHC17
15.63403416	15.89314842	15.43884563	15.8993187	15.64031124	15.93585682	15.36993027	15.93523979	15.69025612	15.87795925	F8VQD4;Q8TAD7	C12orf75;OCC1
13.74262238	14.10969067	13.96397591	13.79634571	13.64255142	13.52802181	14.21568298	14.05779457	13.79816151	13.6997509	F8VQZ7	METAP2
14.42420101	14.18533421	14.6591177	14.70365906	14.87170792	14.8019228	14.62623215	14.82147789	15.3700943	15.11036587	F8VRH0	PCBP2
13.73009777	13.72903728	13.37889862	13.41002083	13.81221199	13.15697575	14.09513378	14.17217445	13.75819778	13.62294579	F8VRU3;H0YIV9;O43716	GATC;;GATC
13.24971867	14.57598019	15.26725769	14.0452528	15.17145538	13.60481644	14.09766769	14.82759953	14.89711857	15.02278805	F8VRV5;F8VXL2;P63167	DYNLL1
15.06805325	14.85642815	15.25677013	15.1535778	15.35545158	15.06311226	15.06350422	15.09805298	15.37229919	15.3357029	F8VTY2;Q8NFH4	NUP37
11.6496973	11.48050499	11.29302502	10.52611542	11.34560776	10.49525642	10.82563305	10.49942398	12.14540958	11.77545929	F8VU39;H0YII3;J3KPG5;Q9UIF9	BAZ2A
14.3868084	14.22005844	13.76335049	13.1548605	13.79777908	13.98801899	14.19610882	13.84103966	13.94646072	13.73438358	F8VUB4;F8VV52;Q9NZN8	CNOT2
14.61308765	14.43686485	13.30367661	12.41375923	11.47527504	13.92346096	14.15519238	12.53458595	12.56918049	12.71243382	F8VUF6;F8VWU0;F8VXZ8;P07585	DCN
13.32178307	13.43504906	13.33920765	13.06482792	13.39486885	13.26776123	13.04347515	13.27078152	13.21039295	13.15529346	F8VUJ3;Q8N4A0	POC1B-GALNT4;GALNT4
14.52846336	14.83120918	14.3209219	12.36440945	13.76896572	13.38980961	14.80998516	14.90238762	14.03700256	13.42598057	F8VUY8;Q96QD8	SLC38A2
15.19075203	14.91793346	15.78129578	15.3530283	15.84515762	15.32918644	14.94732475	15.68501663	16.19629478	15.22610092	F8VV56;F8VWK8;F8W022;P08962	CD63
16.58979797	16.44903374	16.17274666	16.33691406	16.41471672	16.21894264	16.45307541	16.31240463	16.13876534	16.31698799	F8VVA7;P61923	COPZ1
13.84008694	13.98065281	13.70500469	13.86743069	13.6089325	13.96981239	13.58244228	13.86478329	13.40971947	14.09531593	F8VVX6;Q5HYK3	COQ5
11.80742073	12.60648251	11.81894302	12.2983427	12.24107265	11.64038944	11.60002232	12.5334692	12.29589176	11.99377155	F8VVY9;F8VZZ6;F8W0P9	TPCN1
17.37152672	16.79339981	16.09633255	15.56205082	16.72535515	16.51241302	16.27358818	15.54227543	16.51036263	17.00245667	F8VXG7;Q99590	SCAF11
15.58440876	15.76926136	15.61021709	15.19279289	15.60750389	15.44383907	15.65707779	15.527215	16.14830017	15.60944366	F8VXJ7;F8W031;Q9Y2B0	CNPY2;;CNPY2
14.79816055	14.22976398	14.6051054	14.72143745	14.54981709	11.86821461	12.84972572	14.44014835	14.2131443	14.25956345	F8VXK3;Q9NPF2	CHST11
11.52006721	12.32046509	11.84774399	12.510849	12.11977673	12.22594452	12.42312622	12.08541203	12.42854309	10.95911026	F8VXY6;G3V1V1;Q8TBF4	ZCRB1
17.72687912	17.8536377	17.44820404	17.40785599	17.40494537	17.5300827	17.55536461	17.43213844	17.00029182	17.2317009	F8VYE8;P36873	PPP1CC
13.60741806	13.59336662	13.77013016	13.79597187	13.82847691	13.35477638	13.3003273	13.63465595	13.79252625	13.73788166	F8VYY9;P54619	PRKAG1
15.71569252	12.46862316	14.80075741	14.13370419	14.53021812	14.11114788	13.9052763	14.59351158	14.6732111	14.1894598	F8VZX2	PCBP2
15.92013359	16.0624733	15.75619316	15.91086292	15.73994637	15.8003521	15.78491211	15.80420589	15.57920742	15.97205544	F8W038;Q8IXM2	C17orf49;BAP18
12.29935074	13.50831032	12.50348854	11.73911285	12.06487751	12.69082546	12.3292923	12.52498341	12.45397282	12.28323174	F8W061;H0YHR7;Q8TB37	NUBPL
13.31512356	13.587883	13.17409039	12.91647339	13.09010601	13.21366787	13.25009537	13.2222805	13.1266737	13.24402046	F8W0J4;O95619	YEATS4
14.55536747	14.23592758	14.28207016	14.30674267	14.72566986	14.65296268	14.84558296	14.9729538	14.62646389	14.41879082	F8W0P7	ATP5F1B
13.40228081	13.70054436	13.56296921	12.94528866	13.62783813	13.65168667	13.6198473	13.96261692	13.8168745	13.88074684	F8W0Q9;Q8NEY8	PPHLN1
17.53625679	17.7467308	17.09524918	17.22755051	17.15678596	17.35109711	17.28349686	17.34367561	17.22156334	17.21818542	F8W1A4;P54819	AK2
18.47790527	18.35492516	17.66706848	17.82352066	17.77035904	16.70568275	16.95800781	17.9659996	16.97698021	17.76955605	F8W1S1;Q7RTS7	KRT74
15.31762981	15.44932365	14.86780548	15.10330009	14.9109354	15.28602505	15.5026722	15.09834385	14.98537445	14.98243999	F8W543	NAP1L1
15.21130943	15.35425282	14.92504311	13.93283367	14.90006924	14.74066067	14.12743378	14.71618462	14.79733276	14.77109337	F8W733;Q9NXR7	BABAM2
17.48617935	17.61340714	15.76161766	15.79938889	16.19720268	14.60994148	15.72890091	16.5857048	14.60485363	15.992836	F8W7C6	RPL10
15.46444798	16.02323341	15.33076859	15.94251347	15.3286047	15.94916439	15.01732731	16.14599991	15.30345726	15.94065189	F8W7Q4;Q96A26	FAM162A
15.1786623	15.21884155	15.18519497	14.82244968	15.13320065	15.09200764	15.22635746	15.10793495	14.93470478	15.15033531	F8W7U3;Q641Q2	WASHC2A
15.71054077	15.66698742	15.67256737	15.53136635	15.5933485	15.48466015	15.65344143	15.60939217	15.63178158	15.49127483	F8W7U8;P49959	MRE11
14.38145638	13.99398804	14.04507446	13.91821671	13.79723644	13.82565308	14.20505333	13.89468861	13.68454456	13.73383141	F8W881;Q9NX05	FAM120C
12.92892075	14.1068182	13.79005146	13.78580189	13.48253441	13.8947382	13.63244057	13.77044773	13.97704506	13.97742081	F8W8D3;Q14493	SLBP
16.35303307	16.42446136	16.73854828	16.85808563	16.03330803	16.94784164	16.4720459	16.08857918	16.57905769	16.41910934	F8W8I6;P31483	TIA1
15.09470367	14.18214989	14.67851925	14.36648655	14.52575397	15.02405071	14.42374802	14.29394245	13.9078474	14.64081478	F8W914	RTN4
15.79303265	15.8940134	15.81352139	15.84505653	15.85202312	16.05929184	15.88559818	15.81412411	15.84140396	15.86922836	F8W930;Q9Y6M1	IGF2BP2
15.92532158	15.79734039	15.8094244	15.66894817	15.94499207	15.73140144	16.08344078	15.7971487	15.84365654	15.85662556	F8W9S7;Q14C86	GAPVD1
13.49899864	13.36893177	13.75771618	13.31853199	13.3677845	13.69033718	13.41556644	13.44357967	13.30243015	13.24716568	F8W9X7;Q567U6	CCDC93
11.78914165	11.76720047	11.37409592	10.01998997	11.80094051	11.72328663	10.58638	11.91578293	11.50835037	10.13107967	F8WAJ0;Q9H8H2	DDX31
15.68058205	15.68719387	15.65283012	15.51826	15.58201218	15.32439232	15.45905876	15.50771332	15.59806633	15.63658142	F8WCA0;J3QRU4;L7N2F9;P63027	VAMP2;VAMP2;;VAMP2
12.48063087	12.57368946	12.55340481	12.20737076	13.12204647	13.57883835	13.14488888	12.36429024	12.9260025	12.51556778	F8WCD0;Q8NC42	RNF149
15.37825775	15.28270531	15.4040823	14.95010567	15.31308174	14.92095661	15.0789957	15.44246292	15.11191082	14.89660549	F8WCJ7;F8WF48;Q99442	SEC62
12.07091331	10.79422855	11.96510506	11.72690296	11.83314037	12.11812115	11.74528694	10.85566902	11.80966854	11.23692799	F8WCX2;H0Y5I5;Q8N1G0	ZNF687
13.59688091	13.75500393	13.36155796	13.60055351	13.40097237	13.62338066	13.49860477	13.72330093	13.4218359	13.7376585	F8WE88;Q9Y4I1	MYO5A
12.60758209	14.36454868	11.8660841	14.53414726	14.67781448	14.04311371	15.02059364	14.15009975	14.33856869	14.05374146	F8WEF8;Q96DF8	ESS2
17.25850487	17.1850853	17.23578835	17.15040779	17.24803543	16.91365242	16.96413803	17.1282959	16.70635223	17.23685646	F8WF69;P09496	CLTA
16.37181664	16.4952507	16.58434868	16.57320213	16.40008354	16.56237411	16.4034214	16.38602066	16.39377213	16.4588089	F8WJN3;Q16630	CPSF6
15.01195526	14.22683334	15.26821327	14.34015179	15.25110626	14.19950485	14.92821884	14.21795464	15.37929916	14.27569103	G3V0I5;P49821	NDUFV1
13.44717884	13.60683346	13.84663486	13.31432533	13.34310722	13.11487484	13.14489746	13.78983307	13.12983894	13.5634346	G3V150;O94766	B3GAT3
13.75260925	13.57479572	13.61491108	13.80043411	13.52911854	11.11231232	11.81317616	13.60255814	13.49830723	13.53921413	G3V167;H0YH02;Q9UGN5	PARP2
17.97741127	18.06068993	18.04222298	18.07471085	18.00115776	17.93561745	18.01320839	17.99126816	18.06446838	18.09437943	G3V180;G3V1D3;Q9NY33	DPP3
16.20886612	16.15231514	15.65387726	15.70540619	15.5715065	15.73466587	15.96552658	15.42199516	15.47976685	15.39619923	G3V1A6;P57764	GSDMD
13.17366028	12.99353981	12.95984077	13.01668262	12.91296387	12.9293499	12.16909313	13.0466795	13.0656004	12.65242863	G3V1P5;Q96RN5	MED15
12.35635281	11.92900467	12.14134121	9.918642044	12.5860281	11.27917099	11.55405807	11.5459671	11.93334675	11.84972286	G3V1S3;Q6ZUT9	DENND5B
14.68725967	13.3935318	14.44168568	13.96003437	14.17402267	13.75618458	13.98028374	13.14221954	13.77418232	13.96077538	G3V1S4;G3V5S9;Q9Y324	FCF1
14.80563736	14.82079315	14.67072392	14.84733963	14.71905899	12.26490593	10.86077404	14.52161121	14.22664165	14.29738045	G3V1U5;Q9Y3E0	GOLT1B
13.29201889	13.79985619	12.6469059	12.99685955	12.90615273	12.45994663	12.26653385	13.10214901	13.24163818	13.22873402	G3V2D5;G3V2P5;G3V515;Q07352	ZFP36L1
14.12720203	14.265728	14.12376022	14.1035471	14.09022808	14.11945057	14.1213541	14.08086872	14.34494591	14.21978664	G3V2U7;P07311	ACYP1
16.06805992	16.13565445	16.09630775	16.12808418	15.98884773	15.97651291	16.07269669	15.85413456	16.18599892	16.17851639	G3V3M6;P27695	APEX1
14.3385725	14.09489059	14.01316833	14.16172886	14.04005814	13.83998966	14.32757092	13.77622604	13.56490612	13.92857933	G3V3Y1;Q8N8N7	;PTGR2
14.86118984	14.98514843	14.6334219	15.02440357	14.77191257	15.05278492	15.05482197	14.90905857	14.91711044	15.09816265	G3V4W4;Q96EK6	GNPNAT1
15.25630093	15.23724651	15.09437943	15.01595974	15.27353001	11.84933472	15.13943863	11.01716423	14.97895336	14.93053436	G3V4Y7	KTN1
14.98228168	14.34387112	14.24004459	13.9048357	14.34343243	14.01593876	14.03839588	13.95066261	13.84605217	13.89828491	G3V4Z4;Q02252	ALDH6A1
15.38896084	15.33096218	15.42693043	15.03430367	15.46290016	15.3405304	15.36948681	15.26421833	15.53700256	15.28127193	G3V529;Q9GZR7	DDX24
12.84309673	13.50873184	13.08126259	13.37948608	12.89879799	13.48839092	13.17457962	13.41586781	13.71277428	13.71213627	G3V583;Q8N128	FAM177A1
13.93196869	14.11529922	13.89418602	13.34782314	13.90504551	13.83214378	13.96971989	14.04986572	13.62907696	13.66269112	G3V599;Q96PC5	MIA2
13.53878117	13.41786766	13.82771587	13.75094986	13.86784554	13.53762722	13.59170437	13.92811012	13.99140358	13.88211346	G3V5E1;O75909	CCNK
16.40759277	16.27667809	16.19541168	16.14865685	16.32487488	16.13525009	16.27102089	16.20943069	16.28014755	16.30340004	G3V5R9	KLC1
17.34243202	17.72838783	17.38406563	17.52851868	17.28700256	16.83052826	16.38185501	17.48831177	17.19483185	17.50030708	G3V5T9;P24941	CDK2
18.45691109	18.39520454	18.54380608	18.49357605	18.48205948	18.33348274	18.30373001	18.43218803	18.43728256	18.36481094	G3V5Z7;P60900	PSMA6
13.7161417	13.31033516	13.6768837	13.70555687	13.59236908	13.63593388	13.63710213	13.11018085	13.80162144	13.62911224	G3XAG1;Q96ME7	ZNF512
13.8512392	14.3956728	14.47837925	14.76161003	14.47010994	14.63673019	14.46022606	14.47528458	14.58565903	14.62278938	G3XAH6;P51003	PAPOLA
14.50843716	14.40730953	14.4606781	14.00252056	14.04084873	14.45422363	14.46571445	14.47116947	14.21436691	14.45349121	G3XAL9;P55011	SLC12A2
14.08929157	13.35614777	13.53379631	13.00833607	13.86249352	12.51561546	12.45476437	13.75748825	13.41014957	13.7576437	G3XAN1;Q9NV88	INTS9
13.53118706	13.4147253	13.66537571	13.87386322	13.67764759	13.42690563	13.34133911	13.70186996	13.90690327	13.68772793	G3XAN4;Q15629	TRAM1
13.60286045	13.71990967	13.6749239	13.72938061	13.26189423	13.23710823	13.21339512	13.3829155	13.47163773	13.79547215	G5E931;H3BN57;Q8TDH9	BLOC1S5;BLOC1S5-TXNDC5;BLOC1S5
12.86168098	12.83699989	12.74926662	12.34788322	11.75647259	12.98551369	12.53791714	12.85570717	12.92855263	12.90734386	G5E994;Q5VW38	GPR107
14.99520588	15.05673885	15.00174236	14.91714287	14.9878397	15.02035046	14.97190189	14.99143696	14.80433178	14.95439243	G5E9W3;Q9UKF6	CPSF3
12.72219658	12.25585938	12.45722008	12.01053905	12.32120132	12.02450943	12.5308466	11.63873577	12.02970505	11.62752533	G5E9Y1;H0YAJ5;Q92870	APBB2
11.17388821	11.7908535	11.94640923	11.4709034	12.10099316	9.815746307	10.15299606	12.08409691	11.81610107	11.40702152	G5E9Z4;Q8TCG2	PI4K2B
15.79843521	15.32363987	15.79872227	15.50139523	15.68151569	15.53664589	15.60598946	15.41693878	15.79440784	15.44899368	G5EA06;Q92552	MRPS27
16.78253555	16.64826584	16.71556091	16.72359467	16.68835068	16.62897491	16.39175797	16.61429787	16.77842712	16.63743591	G5EA30;Q92879	CELF1
16.10842514	16.05259323	16.37835693	16.26635361	16.42256737	16.31848907	16.38326454	16.23064804	16.42036819	16.30270195	G5EA31;P53992	SEC24C
13.92619991	13.66487789	14.44837284	14.40504169	14.55959511	14.2732563	13.99175358	14.34687901	14.60123158	14.00643063	G5EA36;P30260	CDC27
10.52721119	11.98134708	11.45300865	11.46304226	11.74689293	10.4723568	10.09788799	10.98894978	11.24527073	10.87717915	G8JL96;Q13332	PTPRS
20.09475899	19.98082542	19.83853531	19.81281853	19.86140442	19.91043472	20.0066967	19.68702126	19.76089859	19.73789787	G8JLB6;P31943	HNRNPH1
13.35798645	13.13473511	13.17338085	12.81980324	13.19881725	13.3659277	13.00365829	13.05570412	12.85122108	12.55313301	G8JLK1;M0QYT5;Q9NZ43	USE1
13.35629082	13.38085365	13.04332733	12.70075035	12.63475132	13.21644497	13.26516056	13.02868748	12.70026779	13.05151272	G8JLQ3;P78537	BLOC1S1
14.36222458	14.31061077	14.29471493	14.0158968	14.03968239	14.39237118	14.22365189	14.25714207	14.28604126	14.14769268	H0UI80;Q8IXH7;X6RLT1	NELFCD
15.77238464	15.84878349	15.86528206	15.94686508	15.9289341	15.99536514	15.81518841	15.88338661	15.75464916	15.78589535	H0Y368;O60762;Q5QPK2	DPM1
13.7009716	13.98400688	13.74282837	13.40224457	13.7087698	13.53992081	13.58167648	13.73823738	13.49242783	13.73547649	H0Y3K4;Q96EV2	RBM33
12.42267895	12.20042801	11.98330307	12.41411304	12.58238983	11.87294388	11.52756977	11.37816048	12.57816029	11.74647045	H0Y4Q6;Q8WUA4	GTF3C2
14.64865303	16.43153381	17.08346748	16.96604538	16.71216011	16.49381065	9.35220623	16.61725044	16.76829529	16.54791451	H0Y4W0;Q9UBI1	COMMD3
12.48431587	12.50929546	12.55799389	12.5267477	12.33854294	12.19013977	12.34238911	12.4683075	12.24858189	12.25014782	H0Y5B0	EPB41L2
10.25034046	11.80742455	12.41271114	11.47989655	12.4127903	11.93679523	11.68984699	11.99333	12.34285355	11.50519657	H0Y5F4;Q8WV93	AFG1L
12.60368633	13.31157875	11.54097176	12.44386482	12.7721653	13.01515961	12.91306973	12.9877615	13.08755398	12.93608189	H0Y5J5;Q7RTV5	PRXL2C
14.08707523	13.99044514	13.61371994	13.96495533	13.7510891	13.49448204	13.60965347	14.26823044	13.63260555	13.65047264	H0Y5K5;Q9Y282	ERGIC3
12.89844608	12.96130085	13.35688019	13.22071362	13.1049881	12.77533913	12.20932579	13.26504421	13.41395855	13.14074039	H0Y612;Q9UPN9	TRIM33
15.20176125	15.45562553	15.50369358	15.55210972	15.51620102	15.78653526	15.60575008	15.36224365	15.69231987	15.64033699	H0Y614;P61960	UFM1
14.00428486	14.19078827	13.45367622	13.13055897	13.72803974	13.49792385	13.56301594	13.28768539	13.65235519	13.6604948	H0Y6A0	ARFGAP3
12.11422634	12.32195282	12.17714405	10.53398132	12.1267643	13.05065155	11.74296761	12.33436108	11.96820259	11.85098457	H0Y6H0;Q8NB78	KDM1B
12.1325922	12.99217606	13.61541557	13.38913822	13.86395359	12.90147781	13.41242027	13.0050211	13.49888897	13.60894203	H0Y6I6;Q96ME1	FBXL18
14.83596039	14.94850159	14.16513634	14.45621777	14.12690639	14.42618275	14.50332546	14.15842915	14.17328262	14.43446732	H0Y704	ZNF185
12.54199123	12.58314419	12.47466373	11.94861031	12.30288792	12.37705898	12.43797112	12.38022423	12.28228378	12.50743294	H0Y720	TNRC6B
15.73157978	15.92900085	14.96453381	15.04054737	15.46684837	14.83347034	15.07522964	15.36556911	14.74302197	14.63883591	H0Y7V5;Q7Z3E2	CCDC186
13.58580971	13.78543472	13.79482651	13.63531399	13.84319687	13.91860676	14.01729584	13.6432209	13.65035439	13.86154079	H0Y7W6;Q96RU3	FNBP1
13.9659996	14.10762787	13.7271328	13.60266685	12.99901772	13.70651817	14.01107311	13.74363899	13.54254436	13.89568138	H0Y858
15.64581585	15.84559441	16.46152496	16.46090317	16.24281693	15.62296486	15.36603355	16.5201149	16.47505379	16.4156971	H0Y8C3;Q9NZJ7	MTCH1
19.34465981	19.51026154	19.48133469	19.58163834	19.43464661	19.23661613	18.9562397	19.40113449	19.28048706	19.48394012	H0Y8G5;Q14103	HNRNPD
14.60493946	14.26166725	14.43107128	14.58255577	14.56990242	12.64515781	14.21018124	14.35805035	14.49106789	14.54994583	H0Y8X4;O43598	DNPH1
13.31272888	13.77321339	13.21075439	13.33484268	13.38519096	13.3105402	13.39636993	13.46333313	13.08409691	13.21889591	H0Y8X6;P46934	NEDD4
16.65425682	16.40813255	16.86340523	16.71351051	16.94114876	16.67787743	16.67066574	16.53806877	16.95038414	16.6682682	H0Y938;H0YAC7;P35606	COPB2
15.68083191	15.59412861	15.46027184	15.63288021	15.44086933	15.61488247	15.58731079	15.50283146	15.47834682	15.51865196	H0Y987;O95394	PGM3
13.8519516	14.21332073	13.82882595	13.76915932	13.88795471	14.26366901	13.59605312	14.29473686	13.34770584	13.88153458	H0Y997;Q96J42	TXNDC15
16.06344795	16.41690063	15.80270195	15.99452591	11.04699612	16.02219582	16.01685143	15.56920815	15.08788109	15.6472044	H0Y9C7;P20933	AGA
14.20321751	14.45735359	14.289855	13.92216301	14.04416943	13.466609	13.85184479	13.93026638	14.03027534	14.04600716	H0Y9X1;Q96EY4	TMA16
14.41641998	14.78268433	14.44317532	14.31853199	14.31815052	14.42884064	14.55741215	14.26593876	14.35258961	14.3933239	H0YAE0;Q7Z6I8	C5orf24
12.81410885	13.17747784	13.35521317	13.06112385	13.29947853	12.73596096	13.14317417	13.35025597	13.18113804	13.21375465	H0YAN8;O15013	ARHGEF10
-0.479361176	8.799726486	11.58680344	10.35724068	9.938498497	9.951645851	9.039185524	8.579406738	7.527914524	7.849699497	H0YAS8;H0YC35;P10909	CLU
11.22722816	11.55766106	10.58823586	10.65860653	11.58371162	9.533537865	9.510020256	10.29124546	10.73145008	9.972405434	H0YB09;H0YB11;H0YB62;Q7Z3D6	DGLUCY
11.65726948	13.40253353	11.54518414	12.83095074	11.70101643	13.25306606	11.86149788	13.3722744	11.90161228	13.27257156	H0YBC7;O60238	BNIP3L
13.20670795	13.17571449	13.45175934	13.31514168	13.39806652	13.54208946	13.50359154	13.33298016	13.45121288	13.43084335	H0YCG2	LAMP2
13.76353455	13.75376511	13.61198711	13.55051231	13.41573811	13.61810589	13.26523113	13.72066879	13.4408741	13.38083458	H0YCP6;H3BLW6;Q5T3F8	TMEM63B
13.56415081	13.19335747	13.10435295	12.67291164	13.10559177	11.63426971	12.4618578	12.60655117	13.13344669	12.76194668	H0YCR5;Q9BQC3	DPH2
12.00579739	12.37455273	12.20154953	11.838521	11.67677116	11.78629112	11.35075665	11.47302341	11.60437489	12.07455635	H0YCY6;Q3LXA3	TKFC
12.11635017	11.18047237	12.25821877	12.09738159	11.71769619	10.92815495	12.59551048	11.58432293	11.88294601	11.46697617	H0YCZ2;Q8NG31	KNL1
14.58975124	15.01752949	14.83073425	14.82866955	14.87972355	15.45195389	15.21200657	15.12201595	15.03232002	15.16583252	H0YD48;H0YE97;H0YEY8	PICALM
12.54780865	12.44268513	12.7454071	12.55073643	12.51536465	12.46901894	12.26396084	12.54123497	12.74290085	12.60493755	H0YD93;Q8WXA3	RUFY2
15.15223026	15.32927322	14.98469925	14.97151279	15.02621746	15.30035877	14.98314953	15.32037067	14.95462418	15.19610786	H0YDB2;Q13586	STIM1
20.36016273	20.30085182	20.31740189	20.25253487	20.21186447	20.15447807	20.25717354	20.32744026	20.18505859	20.20067787	H0YDN1	PLEC
17.49979591	17.24467087	17.75704956	17.7022953	17.80316353	17.77968216	17.81913567	17.68749428	17.81214714	17.78948593	H0YDT6;O00303	EIF3F
16.45651817	16.25384903	16.10901451	16.0447979	16.17922783	16.20654678	16.09743309	15.97658157	15.84687519	16.18576241	H0YDU8;P53041	PPP5C
14.21559906	14.38866711	13.76315975	13.59287071	13.82648849	14.08798599	13.42691708	13.93834591	13.47946548	13.96323204	H0YE51;Q9Y3D2	MSRB2
13.33082962	13.20484161	13.65796375	13.63058186	13.79268742	13.39055252	13.31211758	13.39239311	13.67750263	13.34129715	H0YE88;P28347	TEAD1
11.6235218	12.56567097	12.73697376	12.49988174	12.88098717	12.64879894	12.13429737	12.59256458	12.59793854	12.35796928	H0YEL9;Q96I59	NARS2
12.79085445	12.86992645	12.80357647	12.77242565	12.91382408	12.8715353	12.71982765	12.96475983	12.80948067	12.53367424	H0YER1;Q96T23	RSF1
16.37673759	16.18322754	16.41534042	16.88611221	16.65834618	16.23153114	16.33821869	16.43493462	16.50778961	16.52525139	H0YEW1;Q38SD2	LRRK1
14.41157627	14.83645916	14.04656887	14.11862469	14.14237785	14.42738342	13.75741005	14.19088745	14.414711	14.45885468	H0YFA4;P52943	CRIP2
18.07275009	17.92021561	18.04290199	17.90277672	18.07017136	18.10153961	17.86539078	18.00922585	17.9128437	17.90586662	H0YFD6;P40939	HADHA
10.27330589	9.641392708	9.25104332	9.291772842	11.1919632	10.7758522	11.01714516	9.300808907	10.90893841	10.37702751	H0YGS7;Q6PJ69	TRIM65
12.31726837	12.64412785	12.36153793	12.59685516	12.41872311	12.4478035	11.92576122	12.29306316	12.51530743	12.23444366	H0YHD0;Q5PSV4	BRMS1L
13.13543224	13.64611149	13.95255566	13.54895115	13.59136581	13.82021809	13.6740427	13.31919765	14.16834736	14.05455399	H0YIN8;Q8IZ07	ANKRD13A
15.59850883	15.39358521	15.78006458	15.56488323	15.6189146	15.42571163	15.29550362	15.47515392	15.65049267	15.54094696	H0YJ75;Q13362;Q96B13	PPP2R5C
11.36996651	11.38123608	12.29305553	11.89519882	12.57106686	9.732961655	9.618240356	12.8920126	13.33596802	12.8823595	H0YJ90;Q86T03	PIP4P1
12.44644547	12.66132164	12.8294239	12.70888996	12.97657681	12.43244839	12.37302303	12.6566658	12.86416626	12.59972477	H0YJH6;P42226	STAT6
14.27026653	14.44004059	14.14943409	13.82928944	14.01139832	13.77386379	14.10646534	14.15143967	14.27113247	14.10398197	H0YJV7;P25490	YY1
14.1210041	13.95860672	14.21390247	14.11282921	14.04693508	13.92722225	13.87909698	14.20616722	14.37703037	14.26002407	H0YK61;H0YNK0;H0YNK8;Q5J8M3;S4R329	EMC4
14.36610699	14.3402462	14.31861019	14.27070618	14.20346832	14.18328857	14.13245392	14.00833702	14.30499077	14.22207928	H0YKB0;H0YKM6;H0YLD7;H0YLT5;H0YLW1;H0YMB7;H0YML6;Q9NZD8	SPG21
18.63473701	18.46133614	18.2573452	18.36582375	18.37397385	18.11307716	18.44543266	18.19966698	17.98207474	18.12260056	H0YKD8;H0YMF4;P46779	RPL28
13.90918255	13.98913097	13.78465557	14.09233284	13.95441151	13.54664898	13.02437687	13.6937561	13.86205959	13.93289566	H0YKV4;Q9H5X1	CIAO2A
12.65972424	12.90157127	12.8457365	11.46118927	12.71444988	12.19960403	12.13070297	12.3880825	12.76159477	12.83104324	H0YLH3;Q92696	RABGGTA
14.3490591	14.06785679	14.01040173	13.71946335	14.21176243	14.09211731	14.19232082	14.0786562	13.98762131	14.0649662	H0YM23;O75179	ANKRD17
22.29624176	22.29568291	22.15267372	22.2921505	22.05431366	22.18009377	22.22525978	22.22616386	21.93383598	22.13041115	H0YMW4;P07355	ANXA2
17.58921623	17.59068298	17.12068558	17.09351921	17.01311874	16.96140671	17.45427704	17.14252281	16.77361488	17.314188	H0YN26;P39687	ANP32A
13.09142876	13.36061096	13.13616371	13.17856312	13.07984924	11.74171734	13.29200172	13.09148121	12.71629906	12.81374836	H0YN65;Q8NCH0	CHST14
14.89221954	14.88034058	14.63085747	14.40923786	14.68539429	14.92292023	14.28700161	14.64863968	15.07813454	14.90868187	H0YN81;Q9GZS3	WDR61
14.94161701	14.03481388	14.73869324	14.66068363	14.60969925	14.70637512	14.60072517	14.69211578	14.83647442	14.72766113	H0YNC2;Q96LJ7	DHRS1
14.45496941	14.68211555	15.1970644	15.24501705	15.17845154	15.05904102	14.50938702	15.28414154	15.54636574	15.23279381	H0YNG3;P67812	SEC11A
15.8616724	15.79777908	15.8218298	15.89734077	15.90631962	15.75566387	15.84729576	15.84136391	16.00561523	15.90686893	H3BLV9;Q96SB4	SRPK1
13.54870129	13.21633244	13.61006832	14.03261948	13.84477234	13.35924244	13.48505497	13.49288082	13.54896164	13.63364124	H3BM14;H3BM74;Q9Y5A7	NUB1
16.82199478	16.75588799	16.1954689	16.12627411	16.25762749	15.97012329	16.03437996	16.31167984	15.79877853	16.54780388	H3BMD8;P56211	ARPP19
10.51054955	12.51867676	11.39805794	10.63014412	11.09240818	10.5762434	10.8988905	11.62143898	12.41291428	11.14842033	H3BMF4;Q9H2V7	SPNS1
17.04367447	17.46790695	17.47976494	17.05491257	17.31016159	17.33868408	17.26025391	17.41958046	17.47272682	17.27838707	H3BMM9;H3BTC0;H3BV80;Q15287	RNPS1
14.14801121	13.8433466	13.95844269	13.68746758	14.04518318	14.05537796	13.85298157	14.16636753	14.1199522	14.00232029	H3BMU1;H3BUI0;P53990	IST1
13.44251823	13.38721371	13.53606796	13.63423061	13.15028095	13.1651926	12.68985081	13.60055256	12.29479504	13.41861916	H3BMU8;Q8NCC3	PLA2G15
15.08566093	15.15048409	14.85001373	14.62811565	14.81930447	14.77641582	14.59525013	14.79960728	14.6333952	14.89651966	H3BMZ9;H3BP57;H3BPB8;H3BPM5;H3BPP3;H3BT48;H3BUZ9;P34949	MPI
17.80335808	17.49285126	17.96585464	18.00163078	18.06593513	17.95762444	17.38619423	17.82103729	18.06066895	18.02581596	H3BN55;H3BS49;H3BUD9;H3BVH7;P51159	RAB27A
14.10110569	14.3430891	13.39093685	13.66093731	13.8294487	13.91534138	13.81440544	14.014678	13.80549717	13.92508793	H3BN64;H3BRF9;H3BRM1;H3BUW6;Q96K21	ZFYVE19
12.76008987	12.21886158	11.27825642	12.18355083	11.73782825	12.63369083	12.2701664	12.7732811	10.77986336	12.42399979	H3BNA5;H3BRL5;Q9NZC3	GDE1
19.48472214	19.41372299	18.40855598	18.6061058	18.65245438	18.76164246	19.0824585	18.90952301	17.9480648	18.44335175	H3BNC9;P08708	;RPS17
9.860115051	10.1682682	10.34917545	11.13230991	10.72215462	10.22110271	9.33460331	10.44382954	11.4846735	11.40261078	H3BNT2;O75208	COQ9
14.841115	14.88696289	14.79646206	14.54146004	14.65683365	14.52966499	14.66513252	14.81415653	14.9111681	14.61033916	H3BNT4;H3BSB3;Q99547	MPHOSPH6
13.00277042	13.06708431	13.25375652	13.4305191	13.21094227	13.32795238	13.394207	13.18081379	13.42019367	13.11513233	H3BNU8;Q1ED39	KNOP1
10.99205875	13.40363407	11.39385891	12.39693737	11.60375023	12.53776741	12.01404476	12.18625355	12.75439453	12.3759079	H3BP28;H3BSZ3;H3BTN8;I3L1T0;Q99807	COQ7
10.08443928	11.88885689	12.19459724	11.86253738	5.319909096	13.04106236	12.88152599	11.97939301	9.4034729	13.40937424	H3BP66;P34059	GALNS
14.27039719	14.4399519	14.21050358	13.95649433	14.14537716	14.14518929	14.18357754	14.38890743	14.22103024	14.17171097	H3BP71;O75150	RNF40
15.89070988	15.98024654	15.78079605	15.68458843	15.75354195	15.82638645	15.9227705	15.90872574	15.70289898	15.80709457	H3BPE1;H3BQK9	MACF1
12.53800488	13.08228493	12.76235199	12.93527794	12.75508499	13.03558064	13.10197926	12.9092741	13.16697598	12.7453413	H3BPK3;Q16775	HAGH
11.72261906	12.02455902	11.54513073	11.35767841	11.63579559	9.566382408	9.012769699	11.38348675	11.73662949	11.57178879	H3BPL5;Q96ES7	SGF29
14.86310387	15.26013088	14.15453243	14.41715431	13.97041416	14.84260559	14.95927525	14.42571259	12.90292645	14.29915619	H3BPN5;H3BTA2;H3BV22;H3BVE3;I3L4X0;P60510	PPP4C
14.80873489	15.45464039	15.27681923	15.20710182	15.29707623	15.5243206	15.18638039	14.76041412	15.27470493	15.41609097	H3BPP2;Q9NRP2	CMC2
11.14806557	9.662795067	10.93745804	10.01605415	10.67360783	10.87008476	11.10183144	9.591918945	11.74735451	11.83024979	H3BQH3;Q8TBB5;Q9UF94	KLHDC4
14.70655537	14.54419708	14.39584732	14.2575798	10.62606049	14.60886192	14.59235001	11.4548254	13.88038921	14.29471779	H3BQZ5;Q8WUR7	C15orf40
11.90219498	11.97937393	12.09401417	11.79328537	11.81963158	12.07936668	11.94046688	12.31434441	12.20958805	12.32405949	H3BR06;Q15554;U3KQ35	TERF2
14.15134621	14.40466785	14.38194847	14.42421818	14.16541195	14.37250137	13.93976784	14.31070232	14.11522484	14.35288048	H3BR29;H3BSM7;Q96GQ5	RUSF1
14.97963333	14.94022751	14.48454571	9.964976311	14.78819275	13.55898857	10.98167324	14.330616	11.6349678	13.94803619	H3BR94;H3BS05;H3BUD2;Q9BTE1	DCTN5
13.78627968	14.58665562	14.01304436	14.34626102	13.72507	14.66239452	13.86410904	14.69152164	14.32869148	14.36290932	H3BRB3;Q14807	KIF22
12.1359663	11.59797859	11.29466438	11.21115017	11.36174202	11.34483528	11.7580452	11.34993076	10.78920269	11.21914101	H3BRB6;Q8ND25	ZNRF1
13.31978989	13.64157295	12.73303032	12.90716267	13.28712749	12.7423954	13.09719849	13.2162075	13.16895676	12.71444035	H3BRE8;Q9BWH6	RPAP1
14.30849934	14.69677544	13.95378399	14.29795074	14.49501896	14.40741348	14.22859192	14.3556242	14.29919815	14.16479397	H3BRL3;O14562	UBFD1
16.69941902	16.77574539	16.56881332	16.72856712	16.56384277	16.71193504	16.81112862	16.73458862	16.67236137	16.44547653	H3BRV9;P61970	NUTF2
12.06680584	12.63718605	12.79397106	11.56660938	12.01725578	12.00094509	10.84365845	11.89417744	12.81804371	12.61488056	H3BRW3;P55789	GFER
12.65563107	12.5239315	13.45676899	13.21988964	13.60602951	13.18541622	13.37346649	12.71398735	13.3595314	13.35751629	H3BSM5;P60520	GABARAPL2
12.46728325	11.99982834	11.85104752	7.623969555	12.60970306	11.17585564	10.89563847	12.38602829	12.34760761	11.52769947	H3BT12;Q9UK73	FEM1B
12.30046463	12.76839161	13.38690472	12.30692196	12.88706303	12.64540482	12.15512657	12.74173737	12.93533134	12.09662342	H3BTB7;Q5JPH6	EARS2
14.09629631	14.0651722	13.78118134	13.76214218	13.9979763	12.28043461	12.37849617	13.60696697	14.02898407	13.58560085	H3BTC2;P24468	NR2F2
8.980866432	11.77688313	10.04109478	9.921393394	9.245389938	10.26080322	0.135255873	10.53582478	9.824681282	10.30108166	H3BTH1;H3BU04;Q9BVW5	TIPIN
16.2639637	16.22284126	16.29742813	16.36087036	15.96609402	16.0260334	15.96612263	16.03617668	16.10887337	16.11619568	H3BTN5	PKM
14.55500031	14.76036453	14.24488831	13.85508633	14.33325291	14.40797615	14.60234165	14.19878578	14.39735985	14.64610672	H3BU16	JPT2
12.96887875	13.33400249	12.46330357	12.82518101	12.44230747	12.91167831	12.99794865	12.77090263	12.47990799	12.70041752	H3BU49;Q9Y2Y0	ARL2BP
12.13492489	12.44282818	11.87361526	11.92095184	11.18174171	9.318264961	11.74170208	11.54404831	11.58174419	11.57430077	H3BU86;O14662;Q96NX8	STX16-NPEPL1;STX16;STX16
13.16169071	12.73552418	12.08447742	11.10687923	11.00837898	11.96407795	12.22103596	9.480665207	10.9829092	9.80251503	H3BUU5;P08047	SP1
15.59546852	15.48212147	15.61026478	15.29114628	15.47866344	15.35010719	15.11015034	15.38580513	15.23059845	15.24010849	H3BUU9;P55287	CDH11
13.28632641	13.55739498	12.35035229	12.77982616	13.05986404	13.20707512	13.60858727	13.28806019	12.94355202	12.94292927	H3BUV9;H3BV23;Q96S82	UBL7
16.9350071	16.67337227	16.78510284	16.75218773	16.85536194	16.85716057	16.53178787	16.9818058	16.99990273	16.75472641	H3BUX2;O43169	CYB5B
14.16927147	13.94503784	13.75858307	13.47227955	13.60509682	13.96158791	14.02397728	13.34766483	13.64707375	13.78331566	H3BVG8;Q7Z3J2	VPS35L
14.21357536	13.92624187	13.01047325	12.83212948	13.43661785	11.30955696	11.93025398	13.38382721	9.665773392	12.72685146	H6UMI1;I3L3J4;O95166	GABARAP
13.93018627	14.27750587	13.78241158	13.95896339	13.56525803	13.74947071	13.88785458	14.01379776	13.56909084	13.86281013	H7BXJ4;Q0JRZ9	FCHO2
16.74980354	16.5602932	16.84490585	16.57695389	16.83558846	16.65061378	16.82314873	16.66000175	16.87154388	16.68157578	H7BXY3;Q7L2E3	DHX30
15.13010406	14.89379311	14.73792171	14.68309212	14.70972443	14.51673889	14.66569042	14.90660286	14.55881882	14.91529465	H7BYF2;Q5JRG1;Q9BVL2	NUP58
14.50092793	14.34271717	14.43668365	14.55627632	14.48493958	14.61850071	14.26618576	14.56762886	14.5556097	14.60167789	H7BYT1;P48730	CSNK1D
16.67043304	16.80988121	16.49276352	16.5323925	16.44153976	16.42344475	16.64216423	16.53025436	16.50634766	16.72076988	H7BYY1	TPM1
21.25482368	21.54017639	20.91279221	21.05104446	20.89305115	21.52971458	21.53520203	21.16793823	20.87414742	21.04412079	H7BZJ3	PDIA3
15.6709938	15.6028471	15.11827183	15.3419323	15.3022337	15.42887688	15.52132225	15.51098728	15.54690552	15.50479412	H7BZT1	SF1
13.90359211	14.11922932	14.43394566	14.3076992	14.26536369	14.37691689	14.36500168	14.45705509	14.94187546	14.44764709	H7C0D5;Q9BSR8	YIPF4
16.02773285	16.2418251	15.81099606	15.81682491	15.85724449	15.97850704	16.11849213	15.95174885	15.78271198	16.04210854	H7C0E5;O75312	ZPR1
15.62979603	15.6768055	15.32086277	15.22980404	15.31684208	15.66273403	15.61415863	15.46579456	15.28590298	15.36857605	H7C131;P09110	ACAA1
10.62887383	11.25717163	10.19015026	9.609103203	10.05860043	10.73469353	10.09936333	11.40468884	9.285017967	10.11664963	H7C152;Q7Z3C6	;ATG9A
14.64601135	14.67301846	13.95066166	14.16404152	13.94595051	14.2160902	14.34061718	14.11319828	14.42007065	14.22610188	H7C1B5;H7C320;Q96C23	GALM
13.80820847	13.97052097	14.41820908	14.26848602	14.50633049	14.06408596	13.96440792	14.12057114	14.29660988	13.69279957	H7C1D0
12.23430157	12.75430775	12.60484028	12.24380302	12.87670422	12.57971668	12.37554932	12.41419315	12.18830776	12.75608158	H7C1J4;Q6BDS2	UHRF1BP1
14.08121204	14.43852043	14.18155098	13.91651249	14.06479645	14.31059456	14.28376484	13.90980053	13.81812191	14.01848698	H7C1M5;Q9H147	DNTTIP1
16.12708855	16.13319397	16.33400345	16.3104763	16.50275421	16.44572258	16.18862915	16.28609657	16.6417408	16.30214882	H7C1U8;Q9BUR5	APOO
11.80361652	9.407156944	11.94661617	11.30541611	11.55246544	11.99678898	11.49016285	10.78624249	11.41491985	11.80045509	H7C1Z7;H7C270;Q9GZU7	CTDSP1
12.54009724	13.0270853	13.09515476	11.83757877	12.82003975	12.18113804	13.11158085	12.93226242	12.8272295	12.87847805	H7C2F7;Q8WVT3	TRAPPC12
10.82806301	11.56673241	11.80557537	11.71389866	11.84866714	12.34890556	12.15290165	11.73206043	12.18077946	12.16149712	H7C2K6	EPB41L1
16.72607422	16.77645683	16.77664948	16.64236259	16.78041649	16.65379715	16.84606552	16.66610527	16.85082817	16.73214722	H7C2Q8;Q99848	EBNA1BP2
10.60439873	10.33585644	8.884243011	9.817835808	8.261663437	9.608913422	9.790402412	9.254448891	8.288654327	10.20344353	H7C3C4	SLC4A7
11.137146	12.07416916	11.91177177	10.87256718	11.97003078	12.01934242	11.57511234	10.76460552	12.06222534	11.6230917	H7C3M7	FARP2
13.76028252	13.81305695	13.21625519	13.13001347	13.20221424	13.61679935	14.00592995	13.45473576	13.22639942	13.26863098	H7C3T2;Q2TAZ0	ATG2A
13.11743355	13.1462822	12.59154987	13.0380888	12.84749126	13.26644325	12.93819046	13.29446411	12.95329189	13.06060791	H7C417
13.64657211	13.68762398	13.33530235	13.21072674	13.43703175	13.58506107	12.40734959	13.43889999	13.60716343	13.44458103	H7C419;O95639	CPSF4
12.9557848	13.65121937	13.53089142	13.29016495	13.18443108	13.78297901	13.58105755	13.74983978	13.91058445	13.76769352	H7C433	MFF
12.59284306	13.15613937	13.21865749	13.22254276	13.56767082	12.7010355	11.63706875	13.33491802	13.67913342	13.12949467	H7C492;Q9Y276	BCS1L
11.7586031	12.56769753	12.11807632	12.20229816	12.30235386	12.3833313	11.80831337	11.26972771	12.27717209	11.4559288	H7C5E4;Q8IZH2	XRN1
14.03792286	13.75381851	13.87598515	13.99427509	14.00238609	13.30548477	13.52394104	13.63332558	13.59290695	13.82703495	H7C5G1;Q2TAA2	IAH1
14.60728359	14.1431675	14.43935776	14.05076218	14.70676136	14.45280075	14.2723093	14.14815712	13.92951298	14.33228779	H7C5U8;Q9P0M9	MRPL27
13.7282505	13.8303957	12.82284451	13.05812073	12.96915436	12.29491043	13.05732727	12.76996136	12.75383377	13.63042545	H9KV50;Q9NZV5	SELENON
18.16302872	18.13954735	18.06641769	17.9161129	16.99780846	17.71257591	19.04297447	18.23191071	18.49828911	19.34562302	HBA_HUMAN;P69905	;HBA1
17.09930229	17.07176971	16.32193375	15.93058395	16.59332848	16.77377892	17.0037117	16.24570465	15.44447899	16.5165329	HBB_HUMAN;P68871	;HBB
20.65114975	20.74097252	20.62580109	20.72720718	20.71930885	20.70445251	20.63953781	20.80055618	20.69021416	20.75085449	I3L0N3;P46459	NSF
15.03138447	15.24553967	14.89207649	14.63479996	14.85692692	15.22556782	15.21709251	14.94739532	15.09266949	14.97085381	I3L0U5;Q6PK04	CCDC137
13.80707455	13.46255779	13.68024158	13.56289864	13.84843159	13.25907898	13.78504848	13.35439205	13.56865311	13.63194466	I3L0X5;O75391	SPAG7
11.31904316	11.70049763	11.82242775	11.39607048	11.13421917	10.77157307	10.79642677	10.43900681	11.12266731	11.4312706	I3L1G1;I3L4I4;J3KQU4;O75674	TOM1L1
17.04074478	16.8656044	17.33247185	17.37870598	17.39995575	17.02199936	16.89616585	17.20333862	17.48134232	17.2431736	I3L1P8;Q02978	SLC25A11
15.81964302	15.82960033	15.50365639	15.53576088	15.4173851	15.45154381	15.80158329	15.44965744	15.41803455	15.48234844	I3L1R7;Q99447	PCYT2
17.016222	17.36437225	16.83582878	16.78405952	16.76486015	17.31766319	17.12761879	17.17033005	16.88753128	16.97317505	I3L1T3;Q9GZP9	DERL2
13.94084263	14.10811996	13.77799511	13.75564861	13.87524128	13.85793304	13.96884346	13.76722622	13.97762012	13.94616604	I3L1Y9;Q96CP2	FLYWCH2
15.42328739	15.51083946	15.30715942	15.29586315	15.41043568	15.6653614	15.48383808	15.40570736	15.5459137	15.41139603	I3L295;J3KT75;J3QRD5;J3QS48;J3QW43;O75352	MPDU1
16.3612957	17.16840363	17.12950325	16.69882774	17.11979294	16.32994461	16.69876671	16.93750191	16.94796753	16.74549866	I3L2C7;P57678	GEMIN4
11.85904694	11.7438364	12.13727093	11.96253777	11.97460747	12.46855259	12.03252316	11.98608398	12.11534119	12.2283287	I3L2J1;Q9Y3C7	MED31
12.37497616	12.36149788	12.04270649	11.70164871	12.08911514	11.93937874	12.290658	12.09860992	12.00474548	11.80657673	I3L2J8;Q9UPN4	CEP131
11.90711975	12.76186943	12.81067944	12.32259178	12.02149391	13.09544373	12.99735355	12.5336237	12.88256264	13.27457523	I3L2K5;Q8IWR0	ZC3H7A
13.58472252	13.54769611	13.13718891	13.38748646	13.11562538	11.17770386	12.38580132	13.25620747	12.848876	13.12967014	I3L2Q8;Q9UIC8	LCMT1
10.33344364	8.093851089	10.3425951	11.03273773	10.20531654	11.05793476	10.07689762	10.46925163	11.98344803	11.06765366	I3L2T9;Q8NB16	MLKL
18.93741226	18.80995178	18.81920242	18.93950462	19.01184845	17.85528564	18.37713051	18.71235847	19.09116364	18.94092751	I3L397;I3L504;P63241	EIF5A
12.63210869	12.71728611	12.8349781	12.82481194	12.8545332	12.83299732	12.61615562	12.8704052	12.77985287	13.07301617	I3NI32;Q02127	DHODH
14.57461452	14.9251194	14.46557236	14.31773186	14.38736534	14.81316471	14.44489288	14.78175449	13.80644512	14.60195637	I3VM54;Q9Y2K7	KDM2A
15.61150265	15.53597736	15.60671425	15.63898563	15.76886082	15.81797504	15.61649704	15.68305492	15.69688034	15.56805992	J3KMX1;Q99567	NUP88
13.74373722	14.14847946	13.48022079	13.7535181	13.51428604	14.05423164	13.876441	13.98582458	13.67666435	14.08235073	J3KMY0;Q99618	CDCA3
15.53559494	15.28298473	15.07329273	16.06929588	14.46648407	15.60639477	15.54180336	14.83163738	14.93497181	15.08705711	J3KMZ8;Q92785	DPF2
15.91745186	15.35973358	15.4115057	15.04771709	15.92689323	15.50857353	15.24796867	15.09404182	15.36391258	15.07832241	J3KMZ9;P01130	LDLR
15.07031345	15.25823498	15.04203892	14.87099648	15.00165749	15.15691757	15.17302513	15.16198349	14.98936462	15.17694473	J3KN01;P55196	AFDN
16.95558548	16.76015091	17.01142502	16.90175056	16.96741295	16.89051628	16.94543266	16.8484211	16.94576454	16.89479256	J3KN16;Q5VYK3	ECPAS
16.95774841	17.11983299	16.45898438	16.51667595	16.43533707	17.1150074	17.05996513	16.82755089	16.42414665	16.6248188	J3KN66	TOR1AIP1
16.16376495	16.21933937	15.82951069	15.7243185	15.87441444	15.78543472	15.99530983	15.81221104	15.65485001	15.89561749	J3KNF4;O14618	CCS
15.0975256	15.11339664	14.32606411	14.19960785	14.14570427	14.32246113	14.05313873	14.38101768	12.0454874	13.41521454	J3KNN3;P15735	PHKG2
11.76329041	13.61304283	14.81849766	14.38483238	14.93299961	14.85614395	14.67328548	14.27941608	15.58351612	14.42501545	J3KNS1;Q9UPW5	AGTPBP1
16.58298302	16.52948189	16.41748047	16.16625977	16.28173256	16.2677536	16.39346504	16.3597393	16.31764221	16.27238655	J3KP06;Q8WWI1	LMO7
19.45675087	19.89047432	19.62654686	19.54331017	19.38759995	19.70147514	19.50509834	19.53592491	19.63269806	19.46554756	J3KP15;J3QL05;Q01130	SRSF2
15.05770397	14.92818737	14.66578484	14.64613819	14.85385418	14.77814007	14.75187969	14.84004498	14.59311104	14.52991867	J3KPD3;Q9Y580	RBM7
13.17910862	13.37836361	13.47271633	13.39900398	13.53264046	12.8750267	12.75045776	13.37629509	13.67228127	13.52763939	J3KPH8;Q8WUI4	HDAC7
16.11997223	16.08959579	15.5484705	15.29400253	15.60740471	14.70639992	15.22053337	15.45534611	15.31459236	15.45857143	J3KPP0;Q9Y6G3;S4R2Z7;S4R360	MRPL42
14.73993492	14.78693008	14.69570732	14.43616772	14.54025745	14.50993061	14.61377621	15.11317444	15.14649963	14.98112392	J3KPP4;O95232	LUC7L3
13.44218731	13.64155197	13.63698769	13.55714989	13.56132507	13.39495373	13.44970608	13.72412968	13.81547546	13.6030426	J3KPS0;Q9NXW2	DNAJB12
20.03020096	20.40616417	19.76202965	20.2550869	19.85484505	20.28138542	19.99853516	20.1937561	19.65217781	20.20046234	J3KPS3;P04075	ALDOA
12.90268517	12.65510368	13.02925968	12.28218651	12.59060001	12.84265423	11.72800922	12.97441578	12.57213306	12.63328648	J3KPT4;Q9H4I3	TRABD
17.63273621	17.47542763	17.82228661	17.85213661	17.92342758	17.73168755	17.77306747	17.62226105	17.92940331	17.83290863	J3KQ32;Q9NTK5	OLA1
15.97837639	15.95819569	16.3940239	16.11355209	16.33930206	16.39886856	16.19902992	16.23948669	16.57300568	16.34760284	J3KQ48;Q9Y3E5	PTRH2
11.89146614	11.01630592	11.68692207	11.52448654	12.0903511	11.85450554	11.74713516	11.2345705	11.70981216	11.35927963	J3KQ61;O95696	BRD1
17.1902771	17.3534565	17.04525948	17.09620476	17.08668327	17.20945549	16.93797684	17.19749069	17.01451683	17.09348679	J3KQJ1;Q8NBJ7	SUMF2
13.29180431	12.80352879	12.6277523	12.70366859	13.04646397	12.66224766	12.39032555	12.82949162	13.13419914	12.51491165	J3KQL8	APOL2
16.98902893	17.06502342	16.3674221	16.26169014	16.6716671	16.32696342	16.8073101	16.61071205	16.39674377	16.15324974	J3KQN4;P83881;Q969Q0	RPL36A;RPL36A;RPL36AL
15.28375912	15.39191151	14.79829597	14.85856915	14.84766102	15.04433918	15.41180706	14.83473492	14.65762043	14.94159031	J3KQS6;M0QXG9;M0R0I0;M0R193;M0R2A4;M0R2K3;M0R3F4;Q9NWV8	BABAM1
12.5568943	12.14354706	12.68536377	11.58708763	11.41562366	13.10872173	13.055089	11.24346256	13.15281677	12.55383015	J3KR35;Q8WUD4	CCDC12
15.3129406	15.24517918	15.31863594	15.39705372	15.46328259	15.34155369	15.22436523	15.37583542	15.50466633	15.35817623	J3KR97;Q9BTW9	TBCD
12.88999939	12.90209389	12.6345253	12.38701534	12.54790306	12.93378067	12.86197758	12.63974285	12.78906441	13.00121498	J3KRA9;Q96Q15	SMG1
13.46855831	13.70474911	13.38341141	13.61435318	13.02108479	13.61482334	13.7089777	13.28746986	13.5345974	13.59879494	J3KRU4;J3KSI2;J3QKM8;Q8WVD3	RNF138
11.95282269	12.19816303	12.61188221	11.54468727	11.94624138	12.99477863	12.20768356	12.41296482	12.60503006	12.35802555	J3KRY6;J3KS44;J3KSB1;J3KSI7;J3QL84;J3QLV3;Q9HC21	SLC25A19
15.74740028	15.71335888	15.53634834	15.55620193	15.63210964	15.03898048	14.9212656	15.54079533	15.64983273	15.42068958	J3KS15;Q14197	MRPL58
13.8361454	13.5559988	13.49115849	13.39503002	13.68266964	13.58208084	13.39112377	13.29267025	13.6281929	13.08310223	J3KS22;Q7Z4W1	DCXR
15.68111897	15.49786949	15.40516663	15.35773373	15.20696545	15.55902195	15.75382805	15.5534029	15.29318905	15.55091667	J3KS54	FLII
15.54019642	15.58587933	15.52968407	15.77886295	15.78393841	15.78737926	15.30827999	15.79860401	15.1861639	15.73083401	J3KS78;J3KSB6;J3KSJ5;J3KTI1;J3QKS6;J3QKZ6;J3QLB7;J3QRG5;J3QRZ2;J3QS53;Q9BQA9	CYBC1
12.96085167	13.72045422	13.12298584	12.65568638	13.59089375	11.34354687	10.96575737	11.1495018	11.75444317	12.70930958	J3KSL8;J3QSA1;Q9Y2L5	TRAPPC8
18.91982269	18.90624237	18.56398964	18.50520515	18.57316589	18.61613655	19.17078972	18.72881126	18.28923416	18.9133358	J3KT51;Q9UK76	JPT1
10.24874878	10.89722919	11.77716351	11.22283745	11.57199287	10.80833912	9.534508705	11.3174963	11.5068531	11.22704983	J3KTA1;Q96IG2	FBXL20
19.789217	19.70157433	19.93636513	19.77880669	19.8109951	19.57032776	19.7044754	19.71999168	19.8181057	19.72995377	J3KTA4;P17844	DDX5
14.1365118	14.17171192	13.23830032	13.49079514	13.28340626	13.59542847	13.64684105	13.67920017	12.92039776	13.53208542	J3KTD8	CBFB
13.05171204	12.97500229	11.84229755	12.44110489	12.54895115	6.948356152	10.75953102	11.76936626	12.00231171	12.70171356	J3KTK5;Q9NWA0	MED9
19.28362656	19.36138725	19.24045372	19.11204529	19.08033943	19.07099342	19.18021774	19.00310898	18.95540237	18.99609184	J3KTL2;Q07955	SRSF1
14.90647221	15.21783066	15.3285923	15.68043423	15.3973341	15.43265629	14.85966015	15.57685757	15.86602592	15.61094761	J3KTM6;J3QQV2;O15427	SLC16A3
15.531703	15.58887196	15.77268505	15.72532272	15.64370728	15.66254807	15.70007133	15.82386112	15.77165318	15.78503227	J3QK89;Q8IWX8	CHERP
12.61595249	12.77318287	12.74393368	12.94180584	12.93507671	12.95346355	12.65291119	12.68925571	12.85172176	12.49119473	J3QKW1;M0R0P9;P31751	AKT2
16.00475311	15.89887333	16.01909065	15.90069485	16.0730381	15.67716312	15.38972664	15.97495556	16.032547	15.97056961	J3QL56;O75880	SCO1
14.06900024	13.74692345	12.39156437	13.13052654	12.49834538	12.90546227	13.38475418	13.63993263	12.91630936	13.63657284	J3QL71;J3QQM9;Q96FV2	SCRN2
10.53135681	11.67085266	11.19034863	12.61716938	12.81147766	9.652373314	10.28900051	12.00347042	13.2273941	11.44612598	J3QLM1;Q14849	STARD3
16.04397964	15.76512432	15.83579063	15.60531616	15.92651367	15.6640358	15.87438011	15.68736935	15.76064396	15.70833588	J3QLR8;Q9Y3D9	MRPS23
14.93694496	14.71195793	15.17864037	14.78702354	15.11048698	14.96066189	14.9075737	14.94168758	15.14273357	14.86714172	J3QLS3;Q9Y2R9	MRPS7
19.61092377	19.58374023	19.85556984	19.67442322	19.91370773	19.78225708	19.76280212	19.71577072	19.82976913	19.64700508	J3QQ67;Q07020	RPL18
14.00625992	13.98128223	13.90291882	13.75084782	13.68370819	13.82291698	13.94837952	13.78312969	13.7571764	13.88616085	J3QQJ0;Q9UHR5	SAP30BP
14.75990391	14.92739868	14.59087276	14.7253294	14.54164505	14.73720646	14.63688469	14.94076824	14.81017494	14.8258419	J3QQW9;Q15022	SUZ12
17.00799179	17.00105667	17.22091293	17.25793648	17.26952744	17.20269012	16.97166824	17.3293705	17.421278	17.28121758	J3QQY2;Q9UM00	TMCO1
15.59816837	15.61148071	15.19506931	15.31290627	15.18182182	15.06205082	15.26960373	15.16486931	15.06921482	15.24071503	J3QQZ9;Q9NVS9	PNPO
13.43838215	13.62557507	13.3075552	13.11724663	12.99499035	13.20495224	13.18788815	13.6796608	13.16358376	13.22694492	J3QR07;Q96MU7	YTHDC1
19.02663612	19.16021919	19.40179253	19.29993629	19.33575821	19.22946167	19.2647438	19.37053299	19.96229172	19.71953011	J3QRS3;O14950;P19105	MYL12A;MYL12B;MYL12A
15.61976147	15.57892799	15.39994335	15.30317307	15.49753666	15.24835396	15.53607178	15.30255222	15.28684807	15.2088232	J3QRS9;O43670;X6R4W8	ZNF207
15.4411068	15.11016083	15.40607071	15.24792194	15.26020336	15.09944725	15.22707176	15.31406879	15.48267078	15.26833153	J3QRU1;P07947	YES1
11.39355183	11.13111782	9.673164368	11.959692	10.47305393	10.7333107	11.29251099	11.15764618	11.15191078	10.87630177	J3QRV5;Q6P1M3	LLGL2
14.34194374	15.19718933	13.27917004	13.68227196	13.69022846	14.98613262	14.68900967	14.58122921	13.23783302	14.44680595	J3QS03;Q9GZX9	TWSG1
12.34244537	12.95176888	13.28039551	12.96262455	13.34435081	12.90707397	12.11588478	13.00531864	10.77198315	12.89479065	J3QSH4;Q14119	VEZF1
13.0257864	13.76972961	12.91957664	13.10607052	13.29978657	13.08498096	13.30281639	13.60674095	13.24444103	13.42441463	J3QSX6	ABLIM1
17.27752113	17.14763641	17.39362144	17.32533836	17.27871895	17.23700523	17.22359657	17.19947815	17.35906029	17.20028305	J3QT28;O43684	BUB3
13.56700134	13.71030712	13.35863972	13.04703712	13.23172951	13.18983459	13.30551243	12.96571159	13.33135128	13.42993832	J3QTA6;Q9BRQ6	CHCHD6
13.8450613	14.01456165	13.83387756	14.04674339	13.82256889	13.31816864	14.00357056	13.29995251	13.40375042	13.18754101	J9JIC5;Q9HAS0	C17orf75
15.43712902	15.52125359	15.30600452	15.19468212	15.11134148	15.29332638	15.42601109	15.12598991	14.95626736	15.04796219	J9JIE9;Q5T013	HYI
17.2528038	17.16849899	17.09099579	17.67289543	17.1318531	16.5515995	17.78929329	17.93038368	17.566782	18.25600433	K22E_HUMAN;P35908	;KRT2
14.96750927	15.11437893	14.5925808	14.57654381	14.37495613	14.40964603	14.83862782	14.52662563	14.29236889	14.47213459	K4DI92;Q6NW29	RWDD4
14.52113628	14.85341549	14.75219917	14.63005447	14.84069157	14.65919685	14.64334393	14.61790085	14.89465237	14.62663555	K7EID2;Q9BT22	ALG1
20.26583481	20.2122097	20.18081284	20.2321949	20.13988304	20.33475494	20.40090179	20.13844109	20.05224419	20.08273506	K7EIJ8;K7EM02;Q8IYT4	KATNAL2
15.48393917	15.41989517	15.50676823	15.37066269	15.26150608	15.48182964	15.26187706	15.21543884	15.55081463	14.85278416	K7EIN4;K7EQ63;Q13445	TMED1
11.30062199	11.43597889	12.2566843	11.55429459	12.14570618	11.60571957	10.99319267	12.24998093	12.60486794	12.17910385	K7EIU6;K7ENY9;Q8WUQ7	CACTIN
11.70469666	13.26105499	10.7153492	13.28560066	13.18388653	12.99431896	13.47130871	13.18727112	13.20360088	13.23197269	K7EIU8;Q13485	SMAD4
14.07814598	13.96272182	13.1435833	13.13471127	13.13868618	12.45205688	13.12193584	12.44315624	12.74396896	12.59500885	K7EIY1;K7ELZ8;K7ENN5;Q9Y421	FAM32A
14.84350204	14.37128067	14.20412064	14.0577898	14.22652912	14.50624275	14.36170483	14.30511093	14.48437786	14.25211525	K7EIY4;K7ELY2;K7EPP9;O60499;Q5U8S2	STX10
16.6724987	16.74912262	16.6845932	16.58749962	16.6962471	16.80954361	16.6159668	16.86097908	16.66286087	16.70810127	K7EJE8;K7EKE6;P36776	LONP1
16.03949165	16.02472878	15.44892597	15.46656322	15.62837219	15.85876369	15.72062778	15.82825851	15.68075371	15.77830791	K7EJH0;K7EJV2;K7EMX1;K7ESQ2	SPC24
12.00115585	11.68152714	12.11131477	11.57284069	11.87515831	12.01078129	11.72539711	11.75041103	11.8180275	11.64342976	K7EJP6;K7EL44;K7ELT9;Q32NB8	PGS1
16.46062851	16.32678413	13.90396595	13.74856472	14.33267689	12.90641975	14.42962742	15.33741665	13.538517	14.33630371	K7EK07;P68431;P84243;Q71DI3	H3-3B;H3C1;H3-3A;H3C15
17.42490196	17.05000114	16.82209015	16.86179543	16.74622345	16.65821075	16.822155	16.95726967	16.64590263	16.91088104	K7EK33;K7EQ55;Q96EP5	DAZAP1
15.10061073	14.85462952	14.74903107	14.4793663	14.92544746	13.20364666	16.01433372	14.79614735	14.942379	15.0104084	K7EK60	FMNL1
12.66141987	12.53045177	13.35612202	13.28906059	12.69893932	10.76416206	13.28035641	12.87630558	11.76954079	12.11401463	K7EKI8;O60437	PPL
13.66729546	13.68432999	13.20506477	13.20652962	12.95878315	13.46225834	13.49472332	13.04707241	12.9513607	13.3392849	K7EL81;Q9BZL4	PPP1R12C
15.54629326	15.7189846	15.38835335	15.55375385	15.44150162	15.42345047	15.5782423	15.6315794	16.01660347	15.46355724	K7ELD9;K7ENG9;O43760	SYNGR2
18.65582466	18.91140556	18.44965935	18.57446861	18.43319511	18.63020515	18.48904037	18.65458488	18.46948624	18.60204506	K7ELL7;P14314	PRKCSH
15.38842869	15.40028	15.2449522	15.24637508	15.17393684	15.22825527	15.24690914	15.29534054	15.14494991	15.16359711	K7ELQ9;Q6UW68	TMEM205
16.20703316	16.24420166	15.88986015	16.05752945	15.89760494	16.13998795	16.4627533	15.9043808	15.89390945	16.13144684	K7EM18;P41567	EIF1
14.94100761	14.8627224	14.65073109	14.35032845	14.81112576	14.6570797	14.51265621	14.38668537	14.70442104	14.20399952	K7EM91;O43291	SPINT2
15.78199768	15.93891335	15.88621902	15.70923328	16.03587532	16.23414993	16.11950493	15.8892889	16.0717659	15.98641968	K7EML7;K7ENY5;Q9UK45	LSM7
14.69951439	14.43051624	14.77691174	14.87396908	14.90518284	14.82114887	14.57938766	14.61461258	14.45784283	14.57798767	K7EMQ3	DNM2
14.79730511	14.39098358	14.50595856	14.74744797	14.64947796	14.39106846	14.5048542	14.05657578	14.0678196	14.1174984	K7EMY7;K7ER15;Q9H0R4	HDHD2
13.54307175	13.29014015	13.40270805	13.71979141	13.48694515	13.40256405	13.6755228	13.44260693	14.05447006	13.99189472	K7ENF0	NARS1
15.78180027	15.58544254	15.51802158	15.70489597	15.68537331	15.52501774	15.50580215	15.66067696	15.52226543	15.6202364	K7ENR6;Q969U7;V9GZ55	PSMG2
14.70919418	14.73964977	14.24902534	14.18410587	14.32115078	14.30836964	14.56993008	14.45365334	13.83278465	14.39209843	K7EP90;Q9BTD8	RBM42
11.99580574	12.27685928	10.216712	10.64554977	11.35992241	10.89139366	10.40867805	9.924482346	10.80778313	10.39620876	K7EPA3;K7EQ34;K7EQE7;Q9NX61;U3KQT6	TMEM161A
13.93239403	13.3547678	13.40690613	13.19043446	13.73409271	13.32532787	13.10020924	13.50431919	13.63855934	12.4025383	K7EQ05;P28799	GRN
13.78943443	11.8216753	13.80295944	13.8387928	13.92145443	13.6310606	13.59494209	13.51345825	13.73757267	13.47412014	K7EQV2;O95707	POP4
16.03070068	15.92253494	16.06173134	16.13964844	16.11449051	16.01659203	16.04447746	16.01187897	16.12421608	16.06312561	K7ER00;Q9Y285	FARSA
14.7996645	14.66534138	14.80072784	14.71529961	14.78910065	14.91438198	15.1343298	14.69691944	14.73449707	14.78939438	K7ERF1;Q9UBQ5	EIF3K
20.13173485	19.96554184	20.08366776	20.14106178	20.04571533	20.1524086	20.04459953	19.97676086	19.82725906	19.96185684	K7ERI7;P35268	RPL22
15.10096264	15.97069645	15.25311279	16.26690292	15.54711437	16.11010361	15.23485088	16.09042931	15.65031815	16.04844666	K7ERJ1;K7ERV3;K7ES52;P04183	TK1
16.00725365	15.77309036	16.06620598	15.82122993	16.0977211	15.86225605	15.6258173	15.90628719	16.03427887	15.82671928	K7ES61;Q9BYD3	MRPL4
14.75720692	14.73994637	14.76391983	14.85699272	14.5398407	14.76043987	14.77678299	14.70515633	14.57940006	14.71688938	K7ESN3;Q8N2G8	GHDC
11.92031479	12.31089783	12.59518719	12.46572208	12.81106758	12.25488472	10.84739017	12.40886116	11.17490673	11.98396873	K7ESP4;Q8WVC6	DCAKD
13.98033142	14.57043743	14.73013115	14.53342438	14.50150299	14.64640808	14.17562962	15.13317394	14.77517796	14.60614967	L0R6Q1	SLC35A4
13.06057072	12.84081745	13.04968262	12.75879288	12.90885353	13.06857777	13.22094345	12.79499435	12.59192181	13.04843807	L0R819;U3KQ49;U3KQP1;U3KQP6	ASDURF;ASDURF;;ASDURF
14.03497601	14.09192944	14.04062557	14.02661133	14.04597569	14.11835766	13.96424103	14.10761642	14.08115005	13.8703661	L0R8F8	MIEF1
14.1082716	14.21675014	14.05036831	13.61049843	14.01090622	13.60233116	13.59179878	13.81899738	13.85941124	13.76173496	M0QWZ7;Q9NP81	SARS2
16.7369957	16.63395309	16.50971222	16.51013184	16.63794136	16.45875931	16.6117363	16.477808	16.35630989	16.42817497	M0QXB4;O14579	COPE
13.50556278	13.79459476	12.49031448	12.53404617	13.30510712	12.63155937	12.18108654	12.56611729	11.98855782	12.4763937	M0QXH0;Q99757	TXN2
15.98775196	16.03033257	15.76497364	15.81489563	15.9897871	15.96868706	15.91460133	16.20992279	16.1354599	16.21473885	M0QXN5;P37198	NUP62
14.85648537	14.81200981	13.46943188	13.79426765	13.70927334	12.7690897	13.8895216	14.54254818	14.67475224	14.77090454	M0QXT0;Q15853	USF2
13.78911114	14.12871265	13.98194599	13.78677464	13.94295597	14.00531673	14.07498837	13.99629688	13.94390965	13.87993717	M0QY97;Q9UPT8	ZC3H4
14.34541416	14.59285259	14.25222683	13.56532669	14.42979145	13.85006809	14.01830959	13.67794609	14.38615894	14.13081169	M0QYA2;Q9NWS0	PIH1D1
13.18263245	15.2821207	13.66868496	12.35565758	12.89727592	14.09895134	13.4839468	13.38594246	13.26691818	13.11425304	M0QYB8;M0QZH0;Q96D15	RCN3
15.82756424	15.4196825	16.25651169	16.38633156	16.34227753	16.05860519	15.59752464	16.22486496	16.27108192	16.02776718	M0QYZ2;M0R0N4;P53680	AP2S1
11.15564919	12.16342831	11.94050407	11.76295948	11.62951088	11.33284187	11.5180912	11.85227013	11.67516899	11.99921417	M0QZ09;Q8N6T7	SIRT6
18.76812363	18.39531708	18.55080032	18.49303055	18.06573296	17.4074707	18.30542564	15.85358238	15.23915386	18.30105019	M0QZM1	HNRNPM
16.08097839	16.21212769	16.05669022	16.00868607	16.07594299	16.16900635	16.11877632	16.16848755	15.99493504	16.18410873	M0QZR4;Q92888	ARHGEF1
13.5848999	13.78391457	12.81130314	13.34401131	13.36892319	13.27581215	13.19529152	13.58048916	11.87190819	13.36504078	M0R043;Q9Y248	GINS2
19.97818756	20.14582062	19.78571129	19.84667015	19.6721859	19.86681175	19.96496964	19.89090347	19.73488045	19.91976929	M0R0C6;Q92945	KHSRP
18.32873344	18.29609299	18.12875938	18.2471962	18.1497364	18.12421417	18.06307411	18.05178261	18.08576393	18.121418	M0R0F0;P46782	RPS5
13.60803032	13.69155025	13.51835918	13.33862114	13.38533783	13.46816826	13.59950924	13.51070309	13.40020657	13.40623856	M0R0P8;M0R300;Q13459	MYO9B
16.41257858	16.32216835	16.55121422	16.48952103	16.66333389	16.73941803	16.69420433	16.65366364	16.75000763	16.70018005	M0R0Y2;P54920	NAPA
16.94733429	16.37907219	16.69108772	16.64788628	16.77199554	15.51339245	16.04961014	16.53622437	16.1574192	16.33386421	M0R117;Q02543	RPL18A
14.45491314	14.85128689	14.97533798	14.87596607	14.95148087	14.50537682	14.66646194	14.93649864	15.24375629	15.19365501	M0R1B0;O43402	EMC8
13.20539474	13.43119526	13.36564255	13.27520943	13.53110409	13.34548473	13.40526772	13.42865372	13.57697487	13.472435	M0R226;Q9BQ48	MRPL34
15.29548168	15.48155689	15.03166389	15.11094379	15.08614731	15.24806499	15.12576199	15.19693565	14.94262409	15.17573738	M0R2A0;Q5UCC4	EMC10
13.8634119	13.95685863	14.00868034	13.49934101	13.82683086	14.22148323	13.89236832	13.98225307	14.19823647	13.90945435	M0R2Z9;Q8IX01	SUGP2
12.26831436	12.21926594	12.22308731	11.99726295	12.17578602	11.42724419	12.42087841	12.45926666	12.39778996	12.34407425	M0R3B2;Q9Y314	NOSIP
14.35689449	14.83046532	13.92247009	14.34315968	14.33704185	13.93135357	14.17613506	14.24716091	14.19250298	14.19468594	M0R3D4;Q9UI14	RABAC1
17.58709717	17.59683418	17.23161888	17.45391846	17.37394142	17.21559143	17.53903389	17.26142693	17.12540436	17.19988823	NEDD8_HUMAN;Q15843	;NEDD8
11.51245594	11.16682911	12.12549019	13.94318771	12.10543442	11.93283176	10.2678318	11.94102573	12.95599842	11.3593235	NQO1_HUMAN;P15559	;NQO1
14.54126263	14.35800838	14.26429462	14.24310589	14.46417809	14.44056702	14.1127491	14.17191219	14.5362978	14.5410099	NQO2_HUMAN;P16083;Q5TD07	;NQO2;NQO2
15.35264683	15.56637573	15.01082516	14.62530041	15.02380943	14.79275894	15.27035332	15.380126	14.46375942	14.9106226	O00115	DNASE2
16.59734917	16.35120201	16.5435009	16.32845688	16.45621681	16.41676331	16.26464653	16.43150139	16.65401459	16.45554924	O00116	AGPS
16.92986679	16.40407562	16.78603935	16.98118401	16.7561512	15.88882351	15.77899456	16.6272831	16.42904282	16.59204102	O00148	DDX39A
18.30859566	18.48395729	18.11680031	18.29058456	18.09796524	18.2877636	18.34646034	18.27143097	18.07168579	18.2070961	O00151	PDLIM1
17.99342346	17.95702744	17.87505913	17.94812775	17.90970612	17.85450935	17.79010963	17.75231743	17.79214096	17.76793098	O00154	ACOT7
15.91191387	15.83403301	15.83349991	15.50359058	16.01223183	15.66600132	15.83677959	15.66333675	15.76359081	15.76328182	O00161	SNAP23
13.77035236	13.83090687	13.47562122	13.54139233	13.46294689	13.52353859	13.54578495	13.78524399	13.57686806	13.47203255	O00165	HAX1
15.99927139	15.94595242	15.69642258	15.6101141	15.67838573	15.841609	15.84075356	15.56622791	15.70338058	15.76085949	O00170	AIP
14.59933853	14.64550495	14.2950325	14.08237648	14.52006531	14.36582661	14.61182499	14.31341553	14.25226974	14.32723236	O00178	GTPBP1
13.65242386	13.51700401	13.97517395	13.80245304	13.81487083	13.94000626	13.74992561	13.86343479	14.01673031	13.8074255	O00186	STXBP3
18.33658218	18.19223976	18.41756439	18.31601524	18.46111298	18.6047554	18.34522438	18.44252968	18.61717415	18.4281559	O00203	AP3B1
14.33708191	14.43400288	14.08477879	14.14442062	14.19027138	14.51130199	14.01136112	14.26845551	13.76642513	14.12946224	O00214	LGALS8
13.62276268	14.71686745	12.6441288	11.9330616	11.98748398	11.96677494	13.89245987	13.74544525	13.46336269	15.12901497	O00221;Q7LC14	NFKBIE
18.05751228	17.86123085	18.1698246	18.17358589	18.22017097	18.0508461	18.0216732	18.08162117	18.29208946	18.18113708	O00231	PSMD11
17.29118156	17.17301178	17.55137062	17.63014603	17.65770149	17.38817024	17.29841614	17.50529099	17.68385696	17.60839462	O00232	PSMD12
17.70512962	17.95542908	17.36901855	17.56238174	17.33402443	17.57213783	17.43152618	17.73583412	17.36589813	17.63717461	O00264	PGRMC1
16.40758896	16.67549706	16.44493103	16.46697998	16.28560448	16.4615345	16.45249557	16.62877083	16.37042618	16.47339058	O00267	SUPT5H
15.22520447	15.11275578	15.23215389	15.19419479	15.14171791	15.12718964	15.37556458	14.97443104	15.39486694	15.28945351	O00273	DFFA
21.664608	21.55337524	21.10527039	21.20808792	21.22105408	21.28845024	21.58083725	21.07149506	20.94171524	21.11875343	O00299	CLIC1
14.57988644	14.49737263	14.53428268	14.37565041	14.50691223	14.55034065	14.44468307	14.36362934	14.63957596	14.39556503	O00330	PDHX
13.90281868	14.40324497	14.7316637	14.27222347	13.53028488	14.90056896	14.88506508	14.70409012	14.60673618	14.4909029	O00391	QSOX1
14.223382	14.2875452	14.0412302	14.10171127	13.97037983	14.12466049	14.18781567	13.8805151	13.66792965	14.00883102	O00399	DCTN6
14.03032112	14.21003342	14.27015686	14.21161461	14.26542377	14.32837391	14.39640045	14.18110466	14.4222393	14.33887005	O00401	WASL
16.82908249	16.7180748	17.17000198	17.07913971	17.19104767	16.88462067	16.89955902	17.16365623	17.19942856	17.23487663	O00410	IPO5
13.3962326	12.9264822	13.15456676	12.28765965	12.84430695	13.15881348	12.60662937	12.99486351	13.03971386	13.24562073	O00411	POLRMT
11.6080904	11.39409065	11.79879951	13.9839201	10.85840225	12.84850121	12.72524071	10.41490555	14.0614872	10.76217079	O00418	EEF2K
14.43854237	14.45819473	14.91544724	14.36935043	14.89114094	13.77136517	12.93732834	14.13521004	14.87251568	14.58214951	O00422	SAP18
16.30766869	16.1912384	16.21148872	16.071455	15.96552849	16.24053192	16.22606659	15.93673325	16.23960114	15.89700222	O00425	IGF2BP3
16.24359131	16.06719017	16.0841732	16.00197792	16.1360569	16.14038086	16.13728142	16.0347023	16.20306969	16.09973717	O00429	DNM1L
13.74644566	13.74413013	13.90633774	13.9435215	14.23773289	14.07566547	13.85680389	13.6945982	14.18245029	13.83686638	O00442	RTCA
12.07505035	11.38107777	11.72091389	11.60465527	12.05734062	10.89314842	11.85329819	11.71428776	11.53983498	11.69033527	O00443	PIK3C2A
14.63122272	14.71010685	14.88821125	14.61813354	14.71298409	14.80539417	14.5970602	14.904809	14.98174095	14.83140755	O00461	GOLIM4
14.08060646	13.89231014	14.24484634	14.16181564	14.34086418	14.16567039	14.04438496	14.28755474	13.92469025	14.31149578	O00471	EXOC5
10.68497562	11.08525562	9.73063755	10.10634613	9.436846733	9.923517227	10.68857574	9.917849541	10.1613493	9.205099106	O00479	HMGN4
16.61479378	16.45840836	16.34185028	16.2670784	16.49012947	16.28829956	16.53042221	16.24720573	16.16281891	16.20016289	O00483	NDUFA4
17.03692627	16.89353561	17.19989395	17.24212837	17.21368217	17.00109482	16.91517067	17.06263924	17.2352829	17.11457634	O00487	PSMD14
15.95861626	15.67111874	15.96288013	15.38663673	15.77299595	15.81259823	16.14082336	15.63018322	15.91896343	15.47576714	O00488	ZNF593
15.01207352	14.57721996	14.72795868	14.21128559	14.90764427	14.68494987	14.98459339	14.73579693	14.84996128	14.85225677	O00499	BIN1
16.40933037	16.23310852	16.25219345	16.2607193	16.16132355	16.227314	16.41748619	16.24822044	16.17253304	16.24580956	O00505	KPNA3
14.18108273	14.12654018	14.00483036	14.05953693	13.95581341	14.22243881	14.09192181	14.01364136	13.72553539	14.05338955	O00506	STK25
15.80806923	15.78940964	16.11960983	15.85929394	16.12920761	16.18268776	16.12571335	15.90561867	16.58103943	16.20351028	O00560	SDCBP
14.24569893	14.30210781	14.54622459	13.94198418	14.21622658	14.17797565	14.38207531	14.26481533	14.69960499	14.40567207	O00566	MPHOSPH10
18.21865463	18.33616447	18.3757019	18.29150581	18.27022934	18.43118286	18.20095062	18.37704659	18.38096809	18.27272224	O00567	NOP56
17.18370438	17.03555489	16.6778183	16.61356735	16.82374001	16.57564163	16.40822792	17.15942955	16.27428055	16.81043625	O00592	PODXL
15.67791367	15.60198689	15.87740803	15.46360683	16.09266853	15.81685925	16.40737915	15.62700462	16.09295082	16.15390968	O00622	CCN1
13.14939117	12.68754196	12.95360756	12.73003769	12.56413174	12.42191887	12.47178173	12.16569614	12.1898632	12.36161232	O00625	PIR
15.99300766	15.87818146	16.00767326	16.00755119	16.07655716	16.09434509	16.06022835	15.8360014	16.11815071	15.86303234	O00743	PPP6C
18.12422562	17.87008095	17.95862007	17.88723373	17.92962646	17.86866188	17.7047081	17.94890594	17.81981659	17.75813675	O00754	MAN2B1
14.67163372	14.91533089	14.74729443	14.68341351	14.6986208	14.59522247	14.78838253	14.95703316	14.9696207	15.11018562	O00762;UBE2C_HUMAN	UBE2C;
14.8104372	14.98985672	14.85999584	15.21289921	14.9598093	14.70903683	14.91240406	14.89702225	15.1252718	15.03581142	O00764	PDXK
13.16893196	12.94998264	11.42690945	12.46698284	11.39228153	12.54037285	12.81277943	11.55533981	10.42874432	11.72228432	O14493	CLDN4
14.54796886	14.67271614	14.41285896	14.01745319	14.41449356	14.33711529	14.40592003	14.4662447	14.23888969	14.4554472	O14497	ARID1A
14.47118187	14.77477455	13.70689392	14.12362957	13.88099766	14.79856682	13.36450481	13.95940781	13.81690502	14.13150978	O14519	CDK2AP1
14.39588833	14.13041401	14.44741344	14.07167816	14.48034668	14.61879349	14.65834999	14.1392765	14.4804163	14.43093872	O14530	TXNDC9
11.36753082	11.34519672	10.90985584	10.33537769	10.71421623	11.09608841	11.26716042	10.36913586	9.59675312	10.76967239	O14545	TRAFD1
14.68260098	14.20851612	14.9595623	14.62752438	14.97675514	14.48670578	14.86128712	14.87748528	14.4222393	14.35447979	O14548	COX7A2L
12.56110859	12.78208447	13.02413177	12.60891438	12.82887173	12.89695454	12.82213783	12.86575413	13.08238125	12.79533005	O14569;U3KQU4	CYB561D2;
15.44595051	15.60183907	15.26577854	15.30742931	15.17638779	15.41689682	15.29763508	15.25870705	15.15177536	15.31557178	O14578	CIT
16.1740303	15.92529583	15.90761852	16.03539658	16.00927544	15.90699482	15.89715099	15.74318886	15.97897911	16.09989357	O14602;P47813	EIF1AY;EIF1AX
15.18789959	15.35379314	14.94658375	14.84662056	14.71378326	14.75128937	14.78219604	14.96002674	14.55983353	14.84191704	O14613	CDC42EP2
14.52197075	14.58175659	14.87057877	14.72589874	14.98322678	14.8233757	14.76526833	14.95778275	15.04015064	14.74388123	O14617	AP3D1
16.84374428	16.83543396	17.04574203	16.94671249	17.01149368	16.70000267	16.66531563	16.87447166	17.26970482	16.90656471	O14646	CHD1
12.97353077	13.90578651	14.33668995	14.62620354	14.35322571	14.61773205	14.11274052	14.33424664	14.73070526	13.6679697	O14647	CHD2
15.46471596	15.05710983	14.92323875	15.05854511	14.9126873	14.63451767	14.46801281	14.91527081	14.76273251	14.78468895	O14656	TOR1A
13.51513481	14.20603275	14.23675728	14.36094856	13.7064352	13.97932529	13.69477081	14.39015388	13.96194458	14.28882122	O14657	TOR1B
15.09861374	14.716856	15.04833031	14.79209518	15.00389099	14.84782791	14.90241241	14.80287933	15.16507435	14.79445171	O14672	ADAM10
16.47461128	16.18107605	16.27457619	16.01722145	16.16309357	15.68759346	15.98350143	16.13557625	15.77316475	15.61693764	O14684	PTGES
15.00150299	14.85775185	12.71670151	14.15357304	14.48493004	13.32887554	14.09152508	14.52606392	12.76118183	13.66029549	O14733	MAP2K7
18.66339874	18.98967361	18.66789818	18.86769676	18.69104385	18.99814034	18.96063232	18.72597694	18.59559631	18.95414543	O14737	PDCD5
15.47101784	15.40258026	15.48445129	15.51211262	15.49523544	15.42652702	15.44503593	15.46908474	15.53475666	15.48373795	O14744	PRMT5
16.37669373	16.4121685	16.10977173	16.24406433	16.00125313	16.14416504	16.29815102	16.17666817	16.05497932	16.1834259	O14745	SLC9A3R1
15.58577347	15.47738266	15.48401642	15.39061546	15.46193409	15.31901646	15.5157547	15.40450382	15.43426037	15.47859764	O14777	NDC80
15.03642845	14.83952618	14.74312782	14.29314899	14.82742214	14.68635845	14.93080425	14.68396091	14.7514019	14.72066212	O14787	TNPO2
18.61964226	18.52971649	18.47083092	18.54790497	18.4871273	18.30466652	18.43784332	18.43007469	18.49458504	18.46427536	O14818	PSMA7
17.36740303	17.31946182	17.22830582	17.18608665	17.1211319	17.34094238	17.36506462	17.21029091	17.35282326	17.21803093	O14828	SCAMP3
13.43547726	13.19104385	13.03232861	13.08250237	13.16152954	13.16687679	12.67363358	12.92970848	12.92038345	13.16327667	O14874	BCKDK
15.00468636	14.92476559	15.11810207	14.90827084	15.34105968	15.22660732	15.08472157	14.92703247	15.57212543	15.11588478	O14879	IFIT3
14.73292923	14.35206795	15.05038261	15.18624115	15.23750591	13.71789265	13.73058796	14.92503357	15.17714596	14.68334389	O14880;Q5VV89	MGST3
15.50456333	15.44048882	15.43631649	15.37846375	15.29972458	15.60622215	15.8358717	15.45893288	15.38177967	15.51329517	O14907	TAX1BP3
15.72991943	15.68918324	15.80548668	15.82722569	15.76382351	15.61083317	15.74338245	15.68729782	15.97624302	15.90130615	O14908	GIPC1
14.94325638	14.59523392	15.12270355	14.85786152	15.00898743	14.78591824	14.62875557	14.90050793	14.90238762	14.86404133	O14925	TIMM23
16.07577515	16.20004463	16.11182213	16.38502693	16.11150169	16.36346817	15.950881	16.2250843	16.11215591	16.21551704	O14929	HAT1
14.31388092	13.70490646	13.84497261	13.39378166	13.88936424	13.40722084	13.09254074	12.50470638	12.59711361	12.68407345	O14933	UBE2L6
16.61180687	16.39598083	16.62841034	16.35614967	16.60246468	16.38937187	16.42614746	16.46959114	16.55127716	16.39920044	O14949	UQCRQ
13.67786598	13.80476856	13.71113396	13.80233955	13.65464687	13.55662155	13.55757236	13.75074673	13.72861862	13.79027176	O14965	AURKA
13.09177971	12.41625977	13.54396915	13.37210846	13.63828659	13.85671711	13.69997406	13.70874786	13.92609501	13.52055931	O14966	RAB29
14.90049839	15.17846775	15.11384869	14.85048199	14.86071777	14.76418018	14.57888985	15.05813122	14.77759647	14.89759064	O14967	CLGN
17.27305222	17.30320549	17.10818481	17.00790405	17.06319809	17.07917786	17.24787903	17.14889717	17.07932472	17.05957985	O14974	PPP1R12A
15.60649204	15.62009239	14.72161865	15.32896805	15.00405216	14.45685863	14.98297882	15.16356182	15.10237408	15.45170593	O14976	GAK
15.49972343	15.76574421	15.49363422	15.10076714	15.29845142	15.36600399	15.67307472	15.75849724	15.02335262	15.39420033	O15027	SEC16A
14.95022678	14.9776268	15.03528404	14.45554256	15.02445698	14.94027424	14.8542099	15.04105377	15.19356251	14.90870953	O15031	PLXNB2
15.49100971	15.37560177	15.72796535	15.65761757	15.64650631	15.65091896	15.40309143	15.56104088	15.79177475	15.3644104	O15042	U2SURP
12.39675236	12.4854908	12.03382683	11.86646461	12.13882446	12.38436985	12.30109596	12.49844742	12.24968624	12.32719994	O15066	KIF3B
16.12409019	16.17437744	16.00438118	15.91697216	16.06005478	15.88116932	16.12669945	16.03108788	15.96405602	16.10917091	O15067	PFAS
16.19461823	16.26442909	16.06642342	15.21573257	15.71107864	16.29613686	16.10803795	15.85596275	16.26303291	15.66950512	O15084	ANKRD28
12.89586544	12.82800007	12.48153973	12.69234085	12.28633976	12.58733749	12.27759266	12.75765419	12.35799503	12.42018986	O15091	PRORP
14.51850891	14.57370472	14.23836517	14.35081291	14.28180981	14.30078506	14.45540047	14.43607903	14.25308418	14.47164917	O15116	LSM1
15.04059792	14.48089027	15.19811153	14.77514362	15.26725674	14.96938515	14.82002354	14.88433552	15.30982971	14.84587288	O15118	NPC1
16.2758503	17.01304054	16.0496006	16.71763611	16.07542992	16.32345009	15.42526627	16.80593491	15.84921265	16.55078506	O15121	DEGS1
15.71357059	15.8766346	15.57555866	15.52860165	15.5016098	15.7624445	15.81836891	15.66941357	15.49686718	15.74058437	O15127	SCAMP2
16.9931221	17.01845932	16.29327774	16.20079422	16.36193466	16.59589195	16.83437729	16.41223145	15.30540752	16.31160164	O15143	ARPC1B
16.62382317	16.47139549	17.05324745	17.1309967	17.20887566	16.70593452	16.66104317	16.89928246	17.42941856	17.24994087	O15144	ARPC2
17.92295837	17.89733696	18.15559578	18.05945969	18.1221447	18.10234833	17.99768066	18.02933311	18.18797874	18.15107346	O15145	ARPC3
17.79117584	17.86154938	17.88791466	17.76999092	17.79107666	17.87774849	17.98070145	17.78764915	17.85143089	17.82353401	O15160	POLR1C
17.65872002	17.85958481	17.47297096	17.55923271	17.33368301	17.54963493	17.42754936	17.68167114	17.49724007	17.54206276	O15173	PGRMC2
18.01532936	17.93849182	17.54190445	17.65374565	17.5289402	17.63695717	17.77754784	17.38779068	17.22472572	17.73431396	O15212	PFDN6
15.15144825	14.93965912	15.04044056	14.71053505	14.8771162	14.77805996	14.9955368	14.61884022	15.05457687	14.71367645	O15213	WDR46
16.02092361	16.27070045	16.10632324	15.93984509	16.03464699	16.18320847	16.10781097	16.18254089	16.17832565	16.0496788	O15226	NKRF
14.5633955	14.69258976	13.8967638	13.6651659	14.06541824	13.80908203	13.66369915	14.24564266	13.78185558	14.06734467	O15228;Q5TBH8	GNPAT
13.70441818	12.68397045	13.35409546	12.25456619	13.49127293	12.65631199	12.29337978	11.87277794	12.98508739	12.23871708	O15230	LAMA5
17.78333855	18.09435272	17.54003716	17.82713318	17.46323586	17.83742142	17.73438454	17.68333626	17.46071243	17.76357079	O15231	ZNF185
12.47099209	12.76952839	12.67823792	12.26472473	12.39260292	12.33237171	12.55315781	12.35576534	11.93359089	12.32936478	O15234	CASC3
14.52950764	14.33689308	14.4407568	14.1540699	14.43977833	14.19512367	14.35119152	14.07179546	14.45358753	14.34944057	O15235	MRPS12
14.83529186	15.03306484	15.29210472	15.4898243	15.25862312	15.28131104	14.7342329	15.50305367	15.6117897	15.44490528	O15258	RER1
17.43015862	17.16928864	17.35067749	17.57106018	17.41517258	16.78807831	16.93096352	17.40189934	17.20729256	17.09906197	O15260;Q5T8U5	SURF4
15.55419064	15.5718565	15.62136173	15.58504295	15.60641098	15.62626743	15.32386589	15.64679909	15.60381985	15.49603462	O15269	SPTLC1
14.249753	13.78892326	14.55148697	14.44044018	14.32679081	14.65522766	14.13938808	14.52498436	14.40255451	14.453619	O15270	SPTLC2
15.34497643	15.24072933	15.55708885	15.28341293	15.41942596	15.32850075	15.46908474	15.3949852	15.71650982	15.47039795	O15294	OGT
14.87115479	14.96095848	14.49695015	14.27816105	14.48787785	14.43946838	14.72510624	14.2276783	14.31825638	14.44780064	O15305	PMM2
17.8940506	17.70942497	17.48112297	17.44513321	17.43504333	17.25755882	17.78720093	17.27062416	17.32601738	17.38238144	O15347	HMGB3
17.22449112	17.44470596	17.15616035	17.33761024	17.05790138	17.36193085	17.46299744	17.22391891	17.25826836	17.36651421	O15355	PPM1G
14.56463337	14.57737732	14.50108051	14.28696537	14.57412815	14.66903496	14.82111454	14.82201385	14.46545601	14.69599152	O15357	INPPL1
17.71356964	17.62804794	17.56810951	17.63639641	17.63813972	17.58899879	17.70472908	17.54107094	17.59864235	17.608181	O15371	EIF3D
12.81273556	12.58373165	12.85630512	12.62518883	12.61315823	12.74390793	11.7122345	12.75868797	12.10692978	12.46233845	O15379	HDAC3
13.32688522	13.2403965	13.37005138	13.16028118	13.21484566	13.26551151	13.08469296	13.26896477	13.2046566	13.30561066	O15397	IPO8
16.1047821	15.99929333	15.60168457	15.38241196	15.56066608	15.67360306	15.75684738	15.63526917	15.29107857	15.60329342	O15400	STX7
15.52928543	15.49289799	15.47766972	15.47597218	15.36299896	15.74791241	15.43117714	15.63056469	15.61935806	15.54486942	O15431	SLC31A1
13.45359707	12.1629982	13.31038666	12.73729515	13.22411823	13.00346947	13.03621864	13.37964821	13.23022556	12.81983566	O15439	ABCC4
16.07935715	16.29771233	15.88561821	15.86172867	15.78562641	16.20804596	16.33569717	16.10510635	16.03240585	16.10071945	O15446	POLR1G
14.97963619	16.83030128	15.1523962	16.7430191	15.42827034	16.81274986	14.92755795	16.77719307	15.18970013	16.57694244	O15460	P4HA2
17.16510201	17.31441879	17.54284859	17.57163048	17.54652596	17.49467087	17.3488884	17.52109909	17.5971508	17.70575333	O15511	ARPC5
14.89536667	15.33054256	14.6484251	14.87682056	14.76375961	15.15095901	14.77416229	15.32774258	14.71669769	15.05845833	O15525;O60675	MAFG;MAFK
13.53745079	13.78004074	13.23075581	13.57957172	12.88818645	13.6243782	13.31251621	13.58568192	13.38895702	13.64918041	O15541	RNF113A
18.5040493	18.34409142	18.57919884	18.60966682	18.50191498	18.39356232	18.30701256	18.47850227	18.60639381	18.3578167	O43143	DHX15
14.83384705	15.11691856	15.16985798	15.26002312	15.06338501	15.37915325	15.09741211	15.28269768	15.20767117	15.25084972	O43148	RNMT
13.45926094	13.52733421	13.28228664	13.6824255	13.40446377	13.90830803	13.81767368	13.35141087	13.05599308	13.61677265	O43149	ZZEF1
13.49791527	13.8132534	13.6044035	13.53590679	13.53316975	13.66553402	13.32756901	13.73691082	13.77284336	13.50032902	O43159	RRP8
12.10906887	11.74801064	11.60142994	11.95661545	11.97050762	12.08354282	11.2267046	11.84482098	12.2079916	11.30221748	O43164	PJA2
17.23292351	17.29547691	17.1993618	17.16876221	17.16225243	17.0654335	17.10224724	17.29009628	17.18189812	17.23957253	O43172	PRPF4
13.92860031	13.429533	14.01639366	13.43505764	13.99192715	13.42909622	13.77802753	13.30483532	14.05474854	13.15837193	O43181	NDUFS4
15.80342197	15.62244892	15.311759	15.20886803	15.44767761	15.33192635	15.49823666	15.30805874	15.34774208	15.26279259	O43237	DYNC1LI2
17.56321335	17.36650276	17.81829071	17.80360985	17.83969116	17.63649559	17.469347	17.68374062	17.91319466	17.7204895	O43242	PSMD3
15.00788212	15.04804325	15.02127457	14.95270634	14.84019947	14.7621212	14.76227474	14.7771616	14.85919857	14.91112137	O43252	PAPSS1
14.88029099	14.87160587	14.72182369	14.59968281	14.76439476	14.88542366	14.82352829	14.79943371	14.70749378	14.78646469	O43264	ZW10
15.82963467	16.13516617	15.94420147	15.78063011	15.89223671	16.09618187	16.007761	16.04139519	16.07910919	15.86606026	O43290	SART1
14.15423584	14.29881477	14.0784359	13.76908016	13.51328373	14.07734394	13.91274643	13.7568779	13.18357849	13.50896835	O43293	DAPK3
12.96767712	12.61374187	12.02612686	12.14404011	12.29839802	12.42638302	12.50966167	12.32746792	12.43306255	12.20147324	O43318	MAP3K7
14.75283623	14.60525799	15.04095745	14.91390991	15.20637226	14.95641708	14.66983032	14.92587852	14.8980341	15.11647034	O43324	EEF1E1
13.67658329	12.91927624	13.37290478	12.37720871	13.26935959	9.877239227	11.77264214	13.5537014	12.87611485	11.0352602	O43353	RIPK2
18.75598526	18.59952354	18.79758072	18.67621422	18.77884674	18.58279419	18.49943161	18.62293053	18.75674248	18.55028343	O43390	HNRNPR
16.54727936	16.62226868	16.48736382	16.38880348	16.41622734	16.47976875	16.45584488	16.50118828	16.39403343	16.42186356	O43395	PRPF3
17.33649635	17.1817131	17.34644508	17.42621803	17.34619713	17.44787788	17.41959572	17.19220161	17.4604187	17.30696678	O43396	TXNL1
18.67407608	18.73155022	18.32492256	18.49071884	18.35545349	18.49727249	18.62643051	18.54811096	18.39773941	18.66931534	O43399	TPD52L2
17.97824287	17.83787346	17.44745255	17.31455612	17.50012016	17.68402481	17.75763321	17.52433395	17.21048355	17.39019775	O43464	HTRA2
17.05615616	17.19421768	16.91939926	17.00751877	16.83106995	16.90909767	17.00928307	16.88508606	16.83993912	16.82943153	O43488	AKR7A2
16.24501991	16.40175629	15.94246578	16.01797104	15.9254818	16.24067307	16.08630943	16.28607178	16.01607323	16.27908707	O43491	EPB41L2
16.23706055	16.15997124	16.35413742	16.55738258	16.30282021	16.60019302	16.31709671	16.44861984	16.78637123	16.61518097	O43583	DENR
15.10596848	15.08767033	15.11138725	15.14756107	15.16572189	15.12744808	15.06233692	15.08322716	15.18725586	15.17822552	O43592	XPOT
16.83217239	16.77919388	16.82080841	16.80524445	16.82037544	16.8860569	16.80259132	16.85606003	17.02041245	16.8535347	O43615	TIMM44
15.45824814	15.26220226	15.35093689	15.19748211	15.39351368	15.26115131	15.43545723	15.23494625	15.53901863	15.49423599	O43617	TRAPPC3
15.93062782	15.95991898	15.71079636	15.50786114	15.65776253	15.67285824	15.92100811	15.71757698	15.4439249	15.58146095	O43633	CHMP2A
15.81297493	15.82959747	15.79324913	15.78528118	15.69427013	15.79476833	15.55706215	15.69232464	15.60960293	15.68915558	O43660	PLRG1
13.6537466	14.45406818	13.85098457	13.90518475	13.77153111	14.08668995	13.54295254	14.2233839	13.76207638	14.0140934	O43663	PRC1
16.26361656	16.62486076	16.30681229	16.71382523	16.33352661	16.69407082	16.56742477	16.5551815	16.56228828	16.79117966	O43665	RGS10
15.73966885	14.32078838	15.2576313	14.06698418	15.30597305	14.23585415	15.47093296	14.37861633	15.07562542	14.13093185	O43678	NDUFA2
17.68353844	17.56119728	17.90851212	17.88497543	17.79439735	17.50844765	17.56568336	17.67074966	17.98014641	17.81265068	O43681	GET3
20.00336456	19.99381256	19.85738182	19.93195534	19.84354591	19.70298958	19.84304047	19.8761673	19.68911171	19.84605789	O43707	ACTN4
14.65854549	14.23466587	14.67284584	14.52950668	14.47103882	14.41582966	14.65438843	14.26055431	14.35114765	14.5733633	O43709	BUD23
16.06567955	16.12749672	16.20298958	16.03946114	16.08204079	16.03625679	15.94001579	16.12083626	16.06599617	16.12066841	O43719	HTATSF1
14.7256918	14.42482948	14.83308792	14.77668858	14.90445423	14.84495735	14.6724081	14.82192898	14.93648815	14.67314339	O43747	AP1G1
14.01514339	14.00701141	13.89323902	13.6412468	14.04225063	13.98644543	13.7954073	13.98474026	14.298069	13.99335861	O43752	STX6
15.64915943	15.45909023	15.20854282	15.28364754	15.3434763	15.40150738	15.34534073	15.10422707	15.28955936	15.54907513	O43768	ENSA
16.83900261	16.81087494	16.82525826	16.75620461	16.8919735	16.72450066	16.75964355	16.72236061	17.07075119	16.77773476	O43776	NARS1
12.54101944	12.2277317	11.91151524	11.61868095	12.15743446	12.34662056	12.73448467	11.39423656	12.17564106	12.57997322	O43805	SSNA1
19.24869537	19.13981056	19.37851143	19.49475479	19.35034561	19.32215881	19.25311852	19.20994186	19.59712791	19.27334404	O43809	NUDT21
15.0324564	14.72637463	14.86468792	14.94663906	15.04785919	14.966959	15.05498314	14.73519516	14.63806152	14.80265236	O43813	LANCL1
15.39869118	15.36677074	15.15348816	15.2766304	15.26707268	15.40257168	15.31658173	15.24211502	15.19549084	15.17330933	O43815	STRN
15.96192646	15.94672871	16.01155853	15.91678143	15.84948635	15.99666882	16.02082825	16.05364609	16.24778938	16.03156281	O43818	RRP9
14.16471958	13.42948151	14.33146763	13.24703503	14.07392979	13.94658852	13.71970367	13.46984386	13.31552887	14.4335041	O43819	SCO2
12.40666008	11.31247425	12.55706596	11.84921074	12.64694023	11.78720379	12.01792431	12.00848389	11.49316406	12.31619644	O43824	GTPBP6
15.68881702	15.56757641	15.71027088	15.66472435	15.55156994	15.6471529	15.51208496	15.4384079	15.29344559	14.71689129	O43826;U3KPU7;U3KQL4;U3KQS2	SLC37A4
14.67249298	14.4844141	14.82554436	14.72472191	14.87543106	14.59542942	14.50708008	14.69672775	14.72758675	14.77584457	O43847	NRDC
18.12428856	18.37652779	18.34123421	18.43261337	18.40605545	18.23448563	18.02655792	18.48382187	18.54143524	18.50812531	O43852	CALU
16.01965141	15.98818588	15.89582443	15.74059677	16.00336456	15.91606236	15.9839325	15.80515957	15.92866898	15.85261345	O43865	AHCYL1
14.35805798	13.7307415	14.69276237	14.07420921	14.64541435	13.79920483	14.15094471	14.23137665	14.94161415	13.97806072	O43920	NDUFS5
12.18112373	11.1818552	12.52882957	11.98589039	12.43174744	11.14636993	11.84839916	12.34794235	12.70545959	11.5634985	O43929	ORC4
16.19686508	16.36221313	16.06195068	16.01515007	16.01201439	15.92738342	16.06818199	16.10233307	15.94788265	15.99904442	O60216	RAD21
11.28858948	11.30912399	12.88150692	11.66580963	12.41246319	8.674508095	10.17019939	11.34425926	11.1118269	10.68385792	O60218	AKR1B10
13.85238171	14.85148907	13.64821625	13.35679436	13.80442715	14.27275181	13.89324665	15.42645073	13.89001465	12.2948904	O60220	TIMM8A
18.05750656	18.1614151	18.17479134	17.99319839	18.06226349	17.99860954	18.03405571	18.00805092	18.12952042	18.04199409	O60231	DHX16
15.17785645	15.14987373	15.05370712	15.11010551	15.21459389	15.09945107	15.08330154	15.07478237	15.08866978	15.13957977	O60256	PRPSAP2
16.0769062	16.09843826	16.26730537	16.20754242	16.27167892	16.08797836	15.97348785	16.32764626	16.32457161	16.29350471	O60264	SMARCA5
15.3108511	15.35962105	15.21097469	15.21494389	15.2177372	15.22275639	15.29317284	15.30587196	15.13989925	15.26530552	O60271	SPAG9
13.88610554	13.91212177	13.82130051	13.60007668	13.55864239	13.36951256	13.52328682	14.0307436	13.87386227	13.91004658	O60287	URB1
14.11219883	14.60446167	14.13029099	14.20512486	14.0563755	14.24834156	14.30949116	14.44797611	14.11560631	13.97707653	O60292	SIPA1L3
14.87633419	14.94154549	15.01013184	14.80520916	14.94506073	14.71350574	14.69111633	15.07148361	14.92278004	14.92124748	O60306	AQR
13.0351429	12.99424267	13.04134846	13.01025009	13.25332165	13.33390522	13.35807896	13.39391232	13.45062351	13.06041908	O60318	MCM3AP
15.66991425	15.38529491	15.62657166	15.52322674	15.49460316	15.8059473	15.57757092	15.51188564	15.60128212	15.58297539	O60341;R4GMQ1	KDM1A
12.56870079	12.5018034	12.0373621	11.80037785	11.90209389	11.4942379	10.92421532	11.79672241	12.22119808	12.27058697	O60347	TBC1D12
13.06692123	13.0112257	12.62915134	12.5239315	12.80316353	12.96571636	13.04906273	12.95390987	12.7278204	12.77023697	O60353	FZD6
12.05042553	12.96874332	11.65725613	9.517663002	11.05556488	10.9418745	11.5415554	11.53009224	11.15728855	11.2962265	O60476	MAN1A2
16.3934803	15.88820744	16.60942459	16.27228165	16.54756355	16.16077232	16.19102097	16.1818409	16.6635437	16.15408325	O60488	ACSL4
16.71344757	16.8047142	16.43407631	16.591856	16.4866581	16.53577805	16.59891701	16.46891022	16.57349205	16.54387283	O60493	SNX3
15.38560009	15.68597507	15.36169815	15.5794239	15.47247314	15.78093815	15.55146408	15.61869717	15.37606716	15.6230402	O60502	OGA
17.61013412	17.28005028	17.45330048	17.23296356	17.42080879	17.44397163	17.19148636	17.57717705	17.18130875	17.44833565	O60504	SORBS3
19.87505341	19.79450989	19.81311607	19.80603027	19.80495262	19.6801548	19.71481133	19.79347229	19.85652161	19.76162148	O60506	SYNCRIP
13.94756413	13.77819538	13.76477814	13.63814449	13.55984116	13.75521374	13.70835114	13.61753273	13.7876997	13.71617985	O60508;Q5SRN1	CDC40
14.56859303	14.58232021	14.29624653	14.19669628	14.15497208	14.12963486	14.33380508	14.24956036	14.14437485	14.36873627	O60524	NEMF
15.37688255	15.3830862	15.48445797	15.30475616	15.53607655	15.3755703	15.33016682	15.21673965	15.2388792	15.35873318	O60547	GMDS
13.19874668	12.5554924	12.4811306	12.86565113	13.12206554	12.14889336	12.64152527	12.80570602	12.65544796	12.77208424	O60551;Q5VUC6	NMT2
13.92718315	13.45753765	13.83215809	13.38616085	13.16188622	13.86889935	13.4324894	13.61144638	13.77471542	13.24980354	O60563	CCNT1
12.81009483	12.27259445	12.97596169	12.28798485	12.69924736	12.65942955	12.58431911	13.27179623	13.08232784	13.34298325	O60566	BUB1B
16.71722603	16.9540062	16.78174019	17.02084732	16.79527855	17.18985558	16.66927719	17.13287544	16.77287102	16.97818375	O60568	PLOD3
15.67642498	15.44820976	16.09710312	16.12477875	16.26491165	15.7602911	15.99398899	15.8954134	16.2911644	15.94597626	O60573	EIF4E2
8.714576721	9.661520958	9.630054474	8.75726223	9.190159798	10.64278126	10.3376255	9.222262383	9.219768524	8.50144577	O60583	CCNT2
14.34191513	14.18976688	14.10719967	13.93117428	14.07312775	13.83859444	14.28610802	14.22212219	14.01169014	14.07329845	O60645	EXOC3
18.89664078	18.92176437	18.68450928	18.67815971	18.78440857	18.7946682	18.88576889	18.6571579	18.70135307	18.81049728	O60664	PLIN3
16.09609032	16.44474983	16.19699097	15.92364788	16.11208916	16.29658699	15.79121494	15.4627037	15.64577103	15.98703957	O60669	SLC16A7
12.79010296	12.56505871	13.10944557	12.69386768	13.103508	13.10407257	13.11535358	12.69066334	12.98907948	13.08038902	O60678	PRMT3
16.33922958	16.04158592	16.08433914	15.8378973	16.07503891	15.86011314	16.08375931	15.97679329	15.90104866	15.83889198	O60684	KPNA6
15.49022198	15.52271557	15.43646812	15.344841	15.31808472	15.29957104	15.22682095	15.40595245	15.60969257	15.44132042	O60701	UGDH
13.94328022	14.11224461	14.10105228	13.91679573	13.99468517	14.48357201	13.96389866	14.19891548	14.15289879	13.89142323	O60725	ICMT
16.60850334	16.53474045	16.41378212	16.36622047	16.42034912	16.39126968	16.49036789	16.34627533	16.38180161	16.35693359	O60749	SNX2
16.25007439	16.20416641	16.17448616	16.16348839	16.14274788	16.17199898	16.20092583	16.07296181	16.06147194	16.16607666	O60763	USO1
15.03490257	14.94190788	14.79683399	14.57462597	14.94364071	14.70206356	14.76220894	14.70520115	14.99987316	14.69141293	O60783	MRPS14
13.34713936	13.85236931	13.34332943	13.04842949	13.49878883	13.40360832	13.53338337	13.24520779	13.14937687	12.97035122	O60784	TOM1
15.02808762	14.95469952	14.67141819	14.52801609	14.65373802	14.6397295	14.51133728	14.76678753	14.40458012	14.79310703	O60826	CCDC22
16.88565826	17.27574158	17.06617928	17.10407829	16.96746254	17.23163795	17.20752716	16.96264076	17.17781258	16.99291229	O60828	PQBP1
13.2700491	13.18622112	13.47551155	13.29040623	13.68048668	13.21001053	12.88017559	13.1865387	13.09873199	12.25213432	O60830;V9GYS0;V9GYU0	TIMM17B
16.92936134	16.86001778	17.02928543	16.96871567	16.96661186	17.02918434	16.86124992	16.99926186	17.07015419	16.90706253	O60832	DKC1
16.94098282	16.84534264	16.886343	16.93614006	16.85684586	16.79942703	17.10542107	16.69434547	16.91926575	16.88437843	O60869	EDF1
16.2463913	16.00481606	16.34435463	16.24684715	16.31757545	16.14951324	16.23028755	16.08739662	16.27898788	16.21910477	O60884	DNAJA2
16.01801491	16.24434471	16.14953423	16.00777626	15.92763996	16.23976898	16.10029602	16.13807297	15.82038593	15.97769833	O60885	BRD4
18.34874535	18.47592163	17.98978043	17.99915123	18.01787567	17.82418251	18.20776367	17.85438728	17.74022865	18.06349564	O60925	PFDN1
13.64102745	13.61674118	13.52728462	13.55474663	13.73286247	12.6159544	13.02694893	13.53271961	13.46265888	13.35765648	O60927	PPP1R11
15.29229355	15.54972839	15.71905041	15.26992512	15.49468994	15.53841591	15.51645374	15.48873997	15.52831364	15.47407436	O60934	NBN
12.77827454	12.9487896	13.09218502	13.24802876	13.09714985	12.31683731	12.54099941	12.88188076	13.08936119	12.97613335	O60942	RNGTT
19.07486153	19.01572609	19.10297966	19.22557831	19.13306046	19.06461525	18.93388367	18.98573494	19.02297592	19.02500153	O75083	WDR1
15.03964424	15.19986343	15.08215714	15.03815269	15.25783634	15.14954662	15.30981445	15.16573429	15.23071194	15.2310276	O75116	ROCK2
15.66405392	15.59770584	16.32820892	16.27566338	15.88376617	15.51599693	15.62485313	15.70554829	16.45410728	15.95125866	O75131	CPNE3
15.07776642	15.13035488	14.80667114	14.57276917	14.8588047	14.84877872	14.76256847	14.72077084	14.52637672	14.7194252	O75146	HIP1R
12.83595371	14.07450867	13.29844379	14.04642105	13.42165089	14.37752151	14.6299839	15.02040005	14.29236412	14.44062328	O75151	PHF2
13.14216709	13.06923866	13.24959564	13.01333618	13.13530827	13.44249344	13.31459332	13.30034924	13.4261694	13.04348373	O75152	ZC3H11A
13.13623524	12.89598656	12.74756908	12.28773689	12.58688354	11.00855255	12.47588348	13.14305782	12.39975548	12.65043068	O75157	TSC22D2
14.09969139	13.990592	14.19268036	13.87233925	14.17969036	13.9411726	13.79885864	14.0943594	14.00215149	14.08739471	O75165	DNAJC13
15.19825268	15.20848179	14.87868309	14.94001579	15.0345974	14.79700089	15.02282333	14.92026806	14.83939934	14.72851849	O75175	CNOT3
14.27952766	14.49959183	14.62566185	14.67071724	14.60908604	14.68246746	14.58379745	14.51099873	14.99492359	14.79607296	O75223	GGCT
14.99918365	14.67757511	15.37355137	14.60617256	15.25220966	14.33269405	14.89065742	14.76300716	15.45175552	14.71353149	O75306	NDUFS2
12.26011848	12.56133938	12.29724503	11.35440731	11.83459949	11.59809113	12.28735256	11.74359798	12.22014427	11.70779037	O75319	DUSP11
15.9855423	15.47729588	15.28446674	15.37766266	15.23952389	14.68049526	15.34688759	15.15938377	14.98029613	15.23740673	O75323	NIPSNAP2
16.44742203	16.5762043	16.60368538	16.63458824	16.47249222	16.3398037	16.24917984	16.32136726	16.56812477	16.50777054	O75340	PDCD6
15.88677692	15.80728436	15.8489418	15.746418	15.80757141	15.74381828	15.93058109	15.68817902	15.90576363	15.85380077	O75348	ATP6V1G1
16.3445816	16.36587334	16.21987343	16.21077156	16.24393272	16.19916153	16.3042717	16.1362896	16.23998451	16.23229599	O75351	VPS4B
19.46565247	19.62218857	19.34710503	19.2989006	19.30566978	19.5085392	19.29560471	19.48239899	19.18327904	19.26467323	O75367	MACROH2A1
16.03745079	16.20684242	15.92486286	15.84262562	15.75461102	15.76258183	16.18635941	15.68203545	15.90360928	15.8304348	O75368	SH3BGRL
20.29216385	20.37143517	20.22179794	20.30993462	20.24789619	20.37554741	20.41571045	20.29537964	20.24225807	20.31593513	O75369	FLNB
12.7822504	12.56638432	12.39146614	11.99557209	12.33174706	12.25136089	12.55823803	12.48875141	12.35001469	12.21827984	O75376	NCOR1
13.9033308	12.89722729	13.71104813	12.89413738	13.62240982	13.35261536	13.58059025	13.67731285	14.19229603	12.67222881	O75380	NDUFS6
13.43263721	13.04211712	13.80726719	13.50210381	13.71518803	13.48010254	13.48420429	13.64966679	14.14938545	13.76845837	O75381	PEX14
13.37039185	13.54205608	13.32836723	12.79691219	13.15428257	13.14558792	13.2875309	12.79825687	13.31554794	13.24811172	O75394	MRPL33
18.47087479	18.33742714	18.34065628	18.31713486	18.40392685	18.33885002	18.27942657	18.42980576	18.26213264	18.31927299	O75396	SEC22B
15.60961342	16.00336266	15.75084019	15.81887722	15.46013165	15.89999676	15.77270412	16.07721329	15.76290226	16.01264572	O75410	TACC1
13.48435974	13.52344894	13.25275803	12.59187889	12.88302994	12.4275074	12.94800377	13.19874668	12.7601862	13.09373379	O75427	LRCH4
13.79259396	13.82025909	13.99779415	13.57736015	14.10097218	12.61332798	13.14017963	13.90247726	13.39844227	13.8006115	O75431	MTX2
16.6147213	16.43143654	17.16169167	17.06841469	17.21448517	16.94173813	17.00239372	16.97284508	17.33984947	17.01854897	O75436	VPS26A
15.61554623	15.96646595	15.40124226	15.04801369	15.43824482	15.40200233	15.83051777	16.52851295	15.17620277	15.34024525	O75438	NDUFB1
15.80100441	15.88047695	15.56751156	15.63104057	15.57637024	15.6325779	15.52869701	15.67877769	15.4894228	15.5211525	O75439	PMPCB
13.49724197	13.26681709	13.48520947	13.72791386	13.55220318	13.26655293	13.33532429	13.4941597	13.44822025	13.5003767	O75449;Q9BW62	KATNA1;KATNAL1
15.3754015	15.68553638	15.92303085	15.88592339	15.86638927	15.88634872	15.61210632	15.87127972	16.04507256	15.68748093	O75475	PSIP1
16.2502594	16.31678581	16.31790161	16.37978745	16.33541298	16.78732491	16.36728477	16.52202606	16.46078682	16.49091911	O75477	ERLIN1
16.58113861	15.93988323	16.66509247	16.16352272	16.62146568	16.22930908	16.61876678	16.08947945	16.51653862	16.00052452	O75489	NDUFS3
17.25648499	17.44531631	17.31700516	17.25732803	17.21432304	17.26324272	17.07108307	17.3438797	17.12177849	17.15488052	O75494;Q5JRI1	SRSF10
15.35052681	15.66799355	15.48801517	15.36786175	15.10498714	15.21625042	15.21282959	15.3336153	14.91436958	15.32006264	O75525	KHDRBS3
14.39550686	15.53584003	14.87915039	14.27705765	15.28618431	14.48910809	14.20133591	15.37798405	14.08412552	15.54483509	O75526	RBMXL2
13.2723217	13.25290012	13.55089283	13.47234154	13.52172184	13.48991871	13.16658306	13.65927505	13.78214741	13.49059963	O75530	EED
17.3483963	16.89397621	16.47290611	16.47538567	16.90284157	16.29698563	16.56044197	17.2836647	15.90599346	16.34903145	O75531	BANF1
16.58106995	16.48128891	16.69231796	16.53367424	16.66016388	16.65718079	16.57099724	16.66750908	16.72257614	16.59218407	O75533	SF3B1
16.97409058	16.94620132	17.00050926	17.11202049	17.00893211	17.01491165	17.13785362	16.97299004	17.06772423	17.09711456	O75534	CSDE1
14.17363644	14.63090229	14.21195126	12.93084526	13.92396069	14.17961025	14.56640625	13.50482082	14.0611124	13.82177448	O75554	WBP4
14.2355299	14.28683853	13.92949104	13.87570286	13.74480247	13.56186771	13.54351044	13.77092934	13.958148	13.77219296	O75569	PRKRA
17.47719955	17.49220085	17.20731926	17.20633888	17.20030594	17.39398003	17.37009048	17.17487335	17.15362167	17.17596054	O75607	NPM3
15.01681614	14.98734951	15.29494476	15.33218765	15.33981037	15.41814327	15.2152195	15.21579647	15.25942421	15.27783298	O75608	LYPLA1
14.89368153	14.84186268	14.72788048	14.33074379	14.68956757	14.98154259	14.83433628	14.74713707	14.73568249	14.71475887	O75616	ERAL1
19.9399929	19.83276558	20.16718292	20.14869118	20.14040184	20.04149437	19.85633087	20.18480873	20.21336746	20.11162186	O75643	SNRNP200
16.08156013	16.26298523	16.35962105	16.27561951	16.27159691	16.00623512	16.05361366	15.94701195	15.98268223	16.28150749	O75663	TIPRL
15.5062151	15.72931004	15.55684757	14.94791126	15.33003044	15.45358849	15.66961575	15.43666458	15.5927124	14.9981823	O75683	SURF6
15.39406395	15.24537277	14.95450497	14.80356789	15.06650639	14.76336575	15.22127151	14.82806778	14.85724735	14.79750252	O75688	PPM1B
14.33256054	13.99579144	14.4904623	14.12782669	14.40007877	13.96336365	14.42641258	14.29676056	14.57351971	14.28005886	O75691	UTP20
14.60384178	14.39598274	14.60238743	14.29890537	14.60434532	14.72999477	14.47206688	14.57057667	14.80276394	14.53036594	O75695	RP2
15.23453808	15.60462284	15.24631691	15.36519718	15.12824726	15.39642143	15.19864368	15.38353634	15.22839165	15.35926151	O75717	WDHD1
14.87072468	14.98263168	15.2280407	15.01767349	15.3168354	15.42179966	15.19037056	15.25116062	15.22840786	15.2406435	O75746	SLC25A12
15.51637173	16.14350891	15.63318729	15.46896935	15.3582716	15.34870815	15.78185749	15.48863602	14.87724876	15.24377823	O75781	PALM
14.0752449	14.41338444	13.96346569	13.95027828	13.94931889	14.18476868	14.1451664	14.09119129	13.86666489	14.16799068	O75792	RNASEH2A
14.37317753	14.12838364	14.04882813	14.00632954	13.97743893	14.21160698	13.76295471	14.08681107	14.31178856	14.09986973	O75794	CDC123
13.38725758	13.15938187	12.96515846	12.6281805	12.74758911	13.08586311	13.15156746	12.58263588	12.89043427	12.85473633	O75815	BCAR3
17.47520256	17.3917141	17.70166969	17.69342232	17.69066429	17.59333801	17.78288078	17.51887703	17.86228752	17.77155304	O75821	EIF3G
14.59398174	14.68228912	14.65462017	14.53366947	14.69314671	14.81287766	14.72431183	14.64197922	15.22528458	14.72005367	O75822	EIF3J
16.9866581	17.03278923	16.76183319	16.90125275	16.81822014	16.94107819	16.86096573	16.77551079	16.67577744	16.91995621	O75828	CBR3
16.40336227	16.15528679	16.56872368	16.59337234	16.57764244	16.6105938	16.40530396	16.4957943	16.72813416	16.38768768	O75844	ZMPSTE24
16.74982834	16.31268501	16.63121605	16.41773796	16.43026352	15.83775234	16.38375664	16.25538826	16.48485184	16.29220772	O75874	IDH1
11.56662178	9.440139771	11.01596642	11.02356243	10.23276711	10.99874878	10.38336086	10.68215084	11.42201233	11.29983425	O75882	ATRN
14.90916061	14.92389965	14.90359211	14.87382412	14.85702991	14.39624882	14.57059193	14.6567955	14.72096348	14.84964085	O75884	RBBP9
13.32415771	13.82741165	13.57981777	13.78735828	13.72509289	13.46323299	13.86061096	13.73329353	13.84154701	14.03056335	O75886	STAM2
15.62196445	15.64048004	16.26646996	16.04066277	16.1949482	16.10578156	15.872962	15.88154984	16.29835701	15.97370434	O75915	ARL6IP5
14.0335865	14.01572895	13.5096817	13.47159386	13.44868755	13.44608974	13.50228405	13.80872917	13.4686451	13.53123569	O75923	DYSF
14.63604259	14.7748909	14.580019	14.47379208	14.55831432	14.71520901	14.64923382	14.72068977	14.70191479	14.73649883	O75934	BCAS2
15.47769928	15.34822083	15.70114517	15.60894871	15.62520027	15.64740467	15.48711205	15.36009407	15.94733238	15.69334507	O75935;X6RCK5	DCTN3
15.62521744	15.64323044	15.93336391	15.78550434	15.69959164	15.59735107	15.72949505	15.7650528	16.04064751	15.77055359	O75937	DNAJC8
16.28649712	16.12120628	16.02080345	15.98448944	16.02004433	16.04867554	16.12609482	15.82015991	14.72511005	15.87482262	O75940	SMNDC1
18.09708405	17.92126274	17.92392731	17.72106361	18.11837006	18.10454178	18.10267258	17.93537331	18.12994576	18.14010048	O75947	ATP5PD
16.69710732	16.7534008	16.69521141	16.59956551	16.78557014	16.80506325	16.64744377	16.72724152	16.73653412	16.68761063	O75955	FLOT1
12.82373905	12.59099388	12.92066765	12.57372379	13.11369419	12.93227768	12.86873817	13.28978062	13.3553791	13.19734192	O75962	TRIO
17.31061554	17.12817001	17.50266457	17.24560738	17.60983849	17.6172142	17.29671478	17.40228462	17.64958382	17.44661903	O75964	ATP5MG
15.59707737	15.54498768	15.44171333	15.3350029	15.49983692	15.31281281	15.50715637	15.46934795	15.35404015	15.43772697	O75976	CPD
15.1097393	15.06397724	15.54652214	15.57055855	15.58464909	15.45623207	15.46548176	15.34686184	16.21323013	15.64073658	O76003	GLRX3
17.15494728	16.95881653	17.35954285	17.05933189	17.19400787	17.13155365	17.05344772	17.09432602	17.29050064	16.89374542	O76021	RSL1D1
15.2773428	15.13065434	15.1347971	14.88018131	15.0888958	15.18181515	15.11406326	15.01815701	15.3170414	15.0345974	O76031	CLPX
14.89114761	14.95501709	14.39871025	14.7460022	14.42558765	14.97813606	14.59135723	14.93121433	14.54495907	14.66758156	O76054	SEC14L2
14.43741894	15.80763245	15.81922054	15.76258564	15.17327118	14.11893368	16.27064705	14.27597427	14.13543797	14.40663433	O76070	SNCG
14.76819992	14.29978085	14.25654888	14.44613552	14.54354572	13.99973774	14.03111744	14.17420578	14.49886799	13.9636507	O76071	CIAO1
15.74962997	15.62467575	15.67136002	15.64322853	15.57204533	15.64328194	15.42247868	15.5446558	15.69044781	15.62444878	O76094	SRP72
17.23693275	17.33082771	16.7635498	17.05890846	16.92100716	17.04857254	17.19389534	16.97784996	16.78714371	16.90540886	O94760	DDAH1
13.29285431	13.21242714	12.78829479	12.60580254	12.44238567	12.70295811	12.43334579	12.122756	12.70138931	12.66992664	O94763	URI1
16.86930466	16.90828514	16.88522911	16.83518982	16.73435593	16.96070671	16.84534836	16.91836548	16.86341667	16.87937546	O94776	MTA2
15.36581039	15.46811295	15.11159801	15.1850872	15.15868378	15.18992138	15.30445862	15.16335869	15.07454681	15.22189713	O94804	STK10
13.55372238	13.9758749	14.19038486	13.85444069	14.3059721	13.69905853	13.69085598	13.80239296	13.88942146	13.84433651	O94817	ATG12
17.23159981	17.12897301	17.32598305	17.13333511	17.24094391	17.34472847	17.31601143	17.25960159	17.3809433	17.2933445	O94826	TOMM70
17.46585083	17.65677452	17.54773331	17.24346352	17.40184021	17.18718719	17.4441452	17.55905151	16.96124649	17.31763458	O94832	MYO1D
14.53876114	14.63790226	14.11555576	13.83660603	14.2896843	14.34049988	13.98444462	14.51164913	14.22784138	14.32242775	O94842	TOX4
13.50137901	13.55413437	13.59918404	13.31345177	13.54406452	13.64626598	13.44592571	13.44636917	13.62136078	13.0420084	O94855	SEC24D
16.5790863	16.7044754	16.64663506	16.42999268	16.53909874	16.51000404	16.36493301	16.44065285	16.58382416	16.51754951	O94874	UFL1
14.28485775	14.32133484	14.62576389	14.29299831	14.3142271	14.24073887	14.01273537	14.45132446	14.78712845	14.4867363	O94888	UBXN7
15.02093315	14.89631271	14.66363907	14.52114582	14.78970528	14.76765919	14.82771873	14.83605194	14.88935852	14.56012917	O94903	PLPBP
16.92998886	17.01249313	16.83211327	16.87965584	16.91512299	17.13713074	16.88480377	16.98082733	16.73525429	16.8706131	O94905	ERLIN2
16.74975777	16.69768333	16.66204071	16.55124283	16.6236763	16.67048645	16.71952629	16.71929359	16.61994743	16.67424393	O94906	PRPF6
15.60804749	15.68449974	15.27633381	15.42982292	15.24123192	15.58887959	15.3668642	15.34822273	15.01849842	15.20876598	O94919	ENDOD1
15.52457237	15.15741634	15.82402039	15.53930855	15.88144779	15.73395157	15.4591465	15.65898037	16.04986572	15.7443161	O94925	GLS
12.9940958	12.49915504	12.73172379	12.72313976	12.23011589	12.99836445	12.29149151	12.56370354	12.71068001	12.63272762	O94927	HAUS5
16.20638657	16.80020523	16.41107178	16.62796783	16.77024269	16.69826698	16.3806076	16.7867794	16.48635674	16.75486755	O94964	SOGA1
16.08566284	16.04535484	16.44194603	16.29291344	16.48007011	16.35541534	16.2291584	16.42798424	16.56027985	16.40930939	O94973	AP2A2
18.74044418	19.02837181	18.69108582	18.5433979	18.73317909	18.44408798	18.73660088	18.74528503	18.75753975	18.66312981	O94992	HEXIM1
14.92724895	14.71266842	14.74636269	14.61247063	14.73999786	14.70161724	14.75776672	14.81264687	14.60934353	14.63200951	O95071	UBR5
13.82819176	13.24783134	13.33601761	12.70877075	12.94078445	12.66309643	13.30766678	12.2163105	11.31071949	11.59969044	O95081	AGFG2
13.56902504	13.58851433	14.09914207	14.19348812	14.09968662	14.02457809	13.67675495	14.13224506	14.35080814	14.00081539	O95104	SCAF4
13.5295105	13.32166481	13.5285368	13.28215885	13.4189167	13.21573067	13.45182419	13.22168732	13.54671669	13.26178265	O95155	UBE4B
16.00154114	15.97260571	15.62959099	15.72019005	15.71544933	15.80343723	15.8426466	15.87818146	15.89923286	15.68954945	O95159	ZFPL1
13.76887512	13.80480957	14.0158844	13.26736736	14.00959873	14.16844749	14.06160355	13.92986679	13.72819042	12.80204105	O95167	NDUFA3
16.60219383	15.99090672	16.33750534	15.98613358	16.26980209	15.98448849	16.26833916	15.95992851	16.03511238	15.68175793	O95168	NDUFB4
15.52901173	15.08972454	15.1021595	14.62908649	15.25244331	14.78755569	15.48142719	15.64168072	14.08825874	14.93987083	O95169	NDUFB8
13.71525097	13.47269249	13.39753151	10.98633003	13.48200512	11.47627831	13.76421928	12.61613941	13.46433163	12.80334949	O95182	NDUFA7
15.7432518	15.7914505	16.06908035	16.22448921	16.19106483	16.00581169	15.64781189	16.33630371	15.64608669	16.19403458	O95197	RTN3
16.94010544	17.02588081	16.99629784	16.93995094	17.00892258	17.16781235	16.98552704	17.05616188	17.07158279	16.94338608	O95202	LETM1
15.47897243	15.29039478	15.41770363	15.2543354	15.39457226	15.26028156	14.94628429	15.1906414	15.32575989	15.25320148	O95219	SNX4
13.89988613	14.44168472	13.86038303	14.11129665	13.9014101	14.15619373	14.07714558	14.35044575	14.04639816	14.35904026	O95229	ZWINT
13.44519424	13.44863415	13.64207077	13.49396229	13.55414104	13.03783703	13.296381	13.28660202	13.69266319	13.4128027	O95235	KIF20A
15.94896793	16.19734955	16.08875275	16.12909317	15.87689877	16.07008171	15.93114948	16.15156364	16.11489487	16.2385273	O95239	KIF4A
12.49452591	11.87264919	11.54244232	11.72523499	11.48327637	10.11112309	11.86110401	11.36913109	10.68921375	10.41438007	O95248	SBF1
16.74911308	16.90122223	16.62163353	16.68933296	16.63717079	16.91450691	16.81755829	16.7649231	16.5409832	16.81851578	O95292	VAPB
13.95254993	13.9007349	13.65850353	13.55429649	13.68914509	13.55244255	13.7679472	13.79958916	13.63783073	13.86406612	O95295	SNAPIN
13.05939102	11.89698315	13.42581367	11.2476902	13.2241087	12.98730755	12.06140995	12.58165073	13.66313362	12.2058754	O95297	MPZL1
14.99089527	13.87605095	15.20010376	14.52116299	15.2171526	13.61615753	14.75364113	14.54473495	14.96348286	14.77591133	O95298	NDUFC2
15.91478634	16.15909386	15.65541267	15.79355526	15.57162189	16.1146698	15.85458755	15.74086857	15.32033443	15.74378109	O95302	FKBP9
18.30274963	18.35223007	18.18275833	18.09328651	17.92146492	18.20754814	18.33544159	17.99108887	17.70804405	17.87913704	O95336	PGLS
17.38158607	17.69239235	17.37445831	17.52147102	17.24201584	17.27847481	17.17072678	17.45121002	17.13953781	17.58986473	O95340	PAPSS2
16.84693527	16.92188263	16.88179398	16.73295021	16.84399605	16.86623573	16.85431671	16.74982262	16.80086517	16.80058861	O95347	SMC2
13.00325012	13.11185265	12.76764107	11.79487991	12.98406219	12.65217972	12.45035458	12.51398659	12.59011269	12.7229023	O95352	ATG7
15.84413624	15.51010895	15.89066982	16.07935715	15.78686142	16.11703873	16.07621956	15.76890755	15.8481226	15.76803589	O95372	LYPLA2
16.49782181	16.41849327	16.7079792	16.70345879	16.76668167	16.65187263	16.69805336	16.73136902	16.96408272	16.77575684	O95373	IPO7
13.91683388	13.47922897	13.64848614	13.34306812	13.72382832	13.78660488	13.59122181	13.77271461	13.76540184	13.74006844	O95391	SLU7
13.54397297	14.21656513	13.36842251	13.52575111	13.63114357	10.09530926	13.22540665	13.30499554	13.33848572	13.87729645	O95396	MOCS3
15.46777725	15.30716038	15.05257702	14.95645142	15.01420689	15.10881519	15.3046999	15.09220791	14.92529583	15.01094627	O95400	CD2BP2
11.33700657	12.40006256	12.40049362	11.51234913	12.55968857	12.13261604	12.19242573	12.13423538	12.76557827	12.46717548	O95429	BAG4
16.59870529	16.43921089	16.84057808	16.81484413	16.83314323	16.74546814	16.77692604	16.64419365	16.85775375	16.90675735	O95433	AHSA1
14.78578663	15.01956844	14.81505013	14.8584404	15.0021286	15.07178688	14.97768688	15.01492786	15.05383587	15.21272373	O95456	PSMG1
16.70269775	16.7745266	16.4401207	16.52381516	16.53949928	16.65460968	16.60617447	16.01196671	16.15407944	16.4817543	O95466	FMNL1
14.29852867	14.45758915	14.73224258	14.65651131	14.59174824	14.74224377	14.21129131	14.83114719	14.74333286	14.70676899	O95470	SGPL1
17.18129539	16.82407951	16.85222626	16.43663025	16.81156349	16.32699013	16.84619904	16.48846245	16.71467972	16.42515373	O95478	NSA2
13.85604382	14.05763531	13.74348164	13.77288246	13.64524078	12.7687645	12.74334908	13.74351597	12.8343401	13.05377102	O95479	H6PD
12.99836063	12.95061111	13.91929054	13.61765671	13.90520096	13.85320759	13.37017059	13.90534401	13.44508457	13.66611862	O95486	SEC24A
14.97333622	14.83407974	15.09747696	14.87483025	15.01139641	15.02725887	14.90257359	14.95679665	14.86281395	14.9283247	O95487	SEC24B
12.37547874	12.8644228	12.92687702	12.80977631	13.07061958	13.09976959	12.80606461	13.10738945	13.64482594	13.15950108	O95551;X6R5A3	TDP2
13.46912575	13.42185593	14.07528019	13.8488102	14.16635418	13.34053993	13.29998398	14.03727818	14.25731373	14.01552773	O95563;Q5R3B4	MPC2
16.29578781	16.21077919	16.18135262	16.13673973	16.17744255	16.52658272	16.25731087	16.03270531	16.18348312	16.17563057	O95571	ETHE1
14.91985703	14.93508053	15.07989979	14.84104252	14.96696663	15.11750126	15.0986824	15.06116772	15.19888973	14.92717838	O95602	POLR1A
14.86989212	14.83229923	14.72459602	14.76708317	14.74262142	14.7533083	14.50562954	14.73824978	14.73231602	14.77354336	O95630	STAMBP
13.65160084	13.60820103	13.43561554	12.48418903	13.13336754	13.15717697	12.03859806	13.09875774	13.09695625	12.98616314	O95671	ASMTL
13.88710785	12.75618267	13.64668751	13.00056839	13.43574619	13.41210651	13.18869877	13.12949276	13.80768585	13.08388996	O95674	CDS2
15.41748142	15.60345745	15.20200825	15.39883041	15.29146862	15.5067091	15.60444736	15.55114746	15.27792168	15.55715752	O95721	SNAP29
14.74655151	14.95560455	15.11984539	15.16173267	15.0599947	15.11692524	14.98254871	15.20705795	15.52886868	15.36539268	O95747	OXSR1
11.6965847	11.7261734	11.37079525	10.57117558	11.68331718	10.8920126	11.73456478	10.92155075	9.036193848	10.3161478	O95749	GGPS1
17.46822548	17.51255608	17.18069458	17.23436356	17.14365196	17.37059593	17.38036537	17.25782394	17.3962574	17.28330994	O95757	HSPA4L
15.00810242	15.19225216	14.71424198	14.88164616	14.75721645	14.92582798	14.90209484	14.89398479	14.55564213	14.84890556	O95758	PTBP3
15.14531708	15.12723541	15.40288448	15.39600754	15.39253139	15.36045742	15.20469666	15.13763332	15.69811249	15.47908211	O95777	LSM8
16.55718422	16.63159561	16.81450272	16.85031891	16.827528	16.94518089	16.71162224	16.86747551	16.83535194	16.79987335	O95782	AP2A1
16.58945465	16.80571747	16.55293655	16.66724396	16.52497673	16.79092789	16.74099731	16.71140289	16.64571571	16.74651718	O95793	STAU1
14.19881153	13.7214365	13.83793926	13.29001713	13.79880428	13.51396084	13.93537521	13.33533096	13.68748379	13.59747314	O95801	TTC4
16.37189674	16.51264763	16.25106239	16.19450188	16.24490738	16.37403488	16.50827599	16.24845695	16.28500175	16.38285637	O95810	CAVIN2
17.07265854	17.03121567	16.78416443	16.80003929	16.9679718	16.81479263	16.81149864	17.02600288	16.8135376	16.9785099	O95816	BAG2
16.28534889	16.36322021	16.19249916	16.17231369	16.27435493	16.12521362	16.24612808	16.25361061	16.16524124	16.26927567	O95817	BAG3
13.36288357	13.18065166	13.48888779	13.21992779	13.25668526	13.31983757	13.47384167	13.2310915	13.43431187	13.40781307	O95825	CRYZL1
14.96817303	14.96039963	14.88869286	15.02303982	15.04358292	14.90979671	14.93193245	14.70022106	15.12641525	15.06173897	O95861	BPNT1
18.32196808	18.40375328	18.1223278	18.18458176	18.12278175	18.11636925	18.24251556	18.01927185	18.03375626	18.11170387	O95865	DDAH2
16.29865265	15.92738247	15.69965744	15.75184727	15.59603024	15.83417606	15.33617783	15.75149441	15.82029533	15.84740162	O95881	TXNDC12
13.51509666	13.79674721	13.24177456	12.86109924	13.56202602	13.63331985	13.76678944	13.46102238	13.51883125	13.73712063	O95926	SYF2
15.56519604	15.62244701	15.44150925	15.53966331	15.32845879	15.6111021	15.68340111	15.55600643	15.34921932	15.63050556	O95983	MBD3
14.12759686	13.26729202	14.47995758	14.57790565	14.34665012	13.34620953	14.06382275	14.27675438	14.22583294	14.50435162	O95989	NUDT3
16.45910263	16.19986153	16.25808334	16.15915871	16.22271729	16.19493675	16.14451408	16.16557121	16.1499157	16.07195473	O96000	NDUFB10
14.82346535	14.84499741	15.48545742	15.19062901	15.25401497	15.09694481	15.02067757	15.41807938	15.83719921	15.44953728	O96005	CLPTM1
14.82409096	14.30395699	14.22518253	14.35148907	14.33929634	13.55760384	14.31506729	14.27987194	14.18335438	14.34389591	O96007	MOCS2
16.12127876	16.07061195	16.74682045	16.62088776	16.75979042	16.6786232	16.40653038	16.81963158	17.22699165	16.88648605	O96008	TOMM40
13.4805088	12.5959959	12.50833321	11.768466	12.58440113	11.77248383	11.82989025	12.69011211	12.19273376	11.87695789	O96011	PEX11B
14.16861725	14.16627598	14.23142242	13.86223793	14.19897842	13.84035587	13.85907078	13.70942116	14.21505642	13.98651505	O96013	PAK4
17.10118294	17.01780319	17.10477448	17.0910511	16.99771118	17.08207703	17.08065987	16.96874809	17.02429962	17.00034523	O96019	ACTL6A
21.41184998	21.81938362	21.47222137	22.01887703	21.51810455	21.85063934	21.3332119	21.76562881	21.29594231	21.79227829	P00338	LDHA
18.44688416	18.4070015	18.60910416	18.58588219	18.54878235	18.62820053	18.46952438	18.59523582	18.59737968	18.51730728	P00367	GLUD1
15.81295013	16.16324234	15.87420654	15.98813152	15.89460754	15.99068356	15.85706997	15.95210171	15.7307272	16.02329445	P00374	DHFR
18.08970261	18.05230904	18.37347031	18.48981667	18.38290977	18.1957283	17.98475075	18.4163208	18.51950455	18.39712715	P00387	CYB5R3
15.40993786	15.2257061	15.40339661	15.20329762	15.42720985	15.34282112	15.41124821	15.07631874	15.33447838	15.1777544	P00390	GSR
17.70316505	17.31637001	17.89198303	17.69849586	17.9013195	17.68010712	17.85041237	17.66002846	18.05754471	17.56936455	P00403	MT-CO2
15.37268066	15.58871841	15.56917477	15.62106895	15.64044189	15.68293571	15.74817371	15.33742619	15.51450825	15.6686182	P00441;SODC_HUMAN	SOD1;
17.59210587	17.61833763	17.81380653	18.03752136	17.87823677	17.52846909	17.46219635	17.83652496	18.10881042	17.95146561	P00491	PNP
17.62460327	17.76034355	17.61509323	17.89259148	17.61924934	17.8419075	17.60882568	17.58722878	17.69755363	17.83627892	P00492	HPRT1
18.20737076	18.08006859	18.33706665	18.27598763	18.39748192	18.23584175	18.10836983	18.25382423	18.42368507	18.26036453	P00505	GOT2
10.56374073	10.87963104	10.92036057	10.00692558	10.27310562	9.126320839	9.741500854	10.3693428	9.753693581	10.54766178	P00519	ABL1
16.27769279	16.34210205	16.4660759	16.44751167	16.3932209	16.50345421	16.3415699	16.48664474	16.57687187	16.52755737	P00533	EGFR
19.83882141	20.41273308	19.52099228	20.25171089	19.52185631	20.19716644	19.75060844	20.01860619	19.30104446	19.97939301	P00558	PGK1
[truncated: 3,262 more rows]
