# Supplementary material for: Novel Iron Chelator SK4 Drives Cytotoxicity through Inhibiting Mitochondrial Metabolism in Ovarian and Triple Negative Breast Cancer Cell Lines
Source: Biomedicines. 2023 Jul 24;11(7):2073. doi: 10.3390/biomedicines11072073 (PMC10377004; doi:10.3390/biomedicines11072073)
Supplement: Supplementary file 1 [file biomedicines-11-02073-s001.zip › Table S6.txt]

SKOV3_control_1	SKOV3_treat_1	SKOV3_control_2	SKOV3_treat_2	SKOV3_control_3	SKOV3_treat_3	SKOV3_control_4	SKOV3_treat_4	SKOV3_control_5	SKOV3_treat_5	PG.Genes	PG.ProteinAccessions
#!{Type}E	E	E	E	E	E	E	E	E	E	T	T
#!{C:Group1}c	t	c	t	c	t	c	t	c	t
17.3239192962646	17.8062324523926	17.6331806182861	17.5231418609619	17.9228801727295	17.7618026733398	17.8708229064941	18.1270961761475	17.8270816802979	18.0307693481445	SERPINB6	A0A024QZX5;A0A087X1N8;P35237
18.0854949951172	18.2793197631836	18.1305446624756	18.1845951080322	18.2637500762939	18.272554397583	18.2358207702637	18.335018157959	18.2561855316162	18.3176040649414	HDLBP	A0A024R4E5;Q00341
18.6572933197021	18.7081985473633	18.5796966552734	18.6528224945068	18.7595272064209	18.6610698699951	18.4658298492432	18.5132484436035	18.6219348907471	18.5628643035889	PSMA2	A0A024RA52;P25787
10.2792224884033	12.7290325164795	11.9420518875122	11.8799200057983	11.8904294967651	12.0974617004395	11.9903154373169	12.1255397796631	12.1556634902954	11.7334432601929	ELOA	A0A024RAC6;Q14241
11.0959568023682	12.1438302993774	11.996470451355	11.558536529541	12.3501453399658	14.8771190643311	13.3863067626953	12.6267356872559	13.3957748413086	13.0872316360474	PPT2;PPT2;PPT2;PPT2;PPT2;PPT2;;;PPT2;PPT2;PPT2;PPT2	A0A024RCQ8;A0A0G2JH76;A0A0G2JHB6;A0A0G2JIU6;A0A0G2JK02;A0A0G2JKR3;A0A0G2JLA3;A0A0G2JLL3;A0A140T8X7;A0A140T9Y1;G8JLL2;Q9UMR5
15.4205513000488	15.9358005523682	15.910400390625	15.8006935119629	15.6893835067749	15.7304563522339	15.9167861938477	15.9308099746704	15.8703451156616	15.9283075332642	BAG6	A0A024RCR6;A0A0G2JK23;A0A7I2V508;A0A7P0MQS5;P46379
15.3693914413452	14.9450521469116	15.0222473144531	15.0621366500854	14.8751192092896	15.2160120010376	15.0345792770386	14.8167009353638	15.0634307861328	14.8729181289673	TJAP1	A0A075B6G8;E2QRK7;Q5JTD0
14.1604232788086	14.9430246353149	14.5526790618896	14.3647336959839	14.055100440979	13.9407501220703	14.5996236801147	12.068528175354	14.46728515625	14.6868276596069	FNBP1L	A0A075B6Q2;Q5T0N5
11.5341310501099	11.4918594360352	11.4810390472412	11.9016733169556	10.7503299713135	11.9078073501587	11.7100915908813	11.6150360107422	11.2400331497192	11.1031513214111	ATAD5	A0A075B754;Q96QE3
12.1135196685791	12.7667350769043	12.9935960769653	13.0094385147095	12.434627532959	11.6042575836182	12.4641580581665	12.821494102478	12.2988357543945	12.5243082046509	USP36	A0A075B784;Q9P275
14.9132356643677	14.5580320358276	14.6032476425171	14.6970300674438	14.4027853012085	14.4840259552002	14.6319589614868	14.2397794723511	14.5295057296753	14.3829975128174	SYNM	A0A075B7B1;O15061
13.9679574966431	12.9458742141724	13.1428289413452	12.2471504211426	12.0451726913452	12.042911529541	13.1691293716431	12.893928527832	12.5096483230591	12.9110221862793	SRGAP2	A0A075B7B5;B7ZM87;O75044
16.1588382720947	17.0358905792236	16.6250877380371	16.7110195159912	17.0695476531982	16.9698238372803	16.847505569458	17.3237972259521	16.8819065093994	17.146068572998	CAPNS1	A0A075B7C0;A0A0C4DGQ5;K7EIV0;P04632;U3KQE2
17.3460140228271	17.8598194122314	17.6062908172607	17.7074375152588	17.9884414672852	18.0383682250977	17.7839679718018	17.8712577819824	17.8335151672363	18.0753765106201	TXNRD1	A0A087WSW9;A0A087WSY9;A0A182DWI3;E9PIR7;F8W809;Q16881
13.5350103378296	14.1514720916748	14.020336151123	14.0057258605957	14.2682619094849	14.79469871521	14.1955690383911	14.3206167221069	14.2059535980225	14.7628889083862	GPX4	A0A087WT12;A0A087X2I2;P36969
11.7636651992798	12.4055347442627	12.5881881713867	12.6512861251831	12.1122980117798	12.5937623977661	12.5534257888794	12.1443347930908	12.4493350982666	11.4702806472778	KIAA1191	A0A087WT18;Q96A73
13.3245706558228	13.2991571426392	13.3777256011963	13.5688524246216	13.5525951385498	13.3294763565063	13.4907741546631	13.2712497711182	13.4164781570435	13.3501844406128	DCAF13	A0A087WT20;Q9NV06
13.8720254898071	14.474681854248	14.6350564956665	14.5066452026367	14.5812129974365	14.5144443511963	14.741904258728	14.6128025054932	14.6133670806885	14.4345827102661	GRIPAP1	A0A087WT45;Q4V328
15.112850189209	15.3408031463623	15.3864498138428	15.1947898864746	15.3506860733032	14.9342498779297	14.867561340332	15.202525138855	15.3083581924438	14.995267868042	LAMTOR4	A0A087WT92;A0A087WV46;C9JXA7;Q0VGL1
15.3899745941162	15.4133462905884	15.3894519805908	15.3659105300903	15.515645980835	15.2787523269653	15.4817895889282	15.5447854995728	15.4915390014648	15.4827117919922	EIF2B4	A0A087WTA5;E7ERK9;Q9UI10
13.746452331543	11.6566114425659	11.257248878479	10.5810394287109	10.9773654937744	11.8126163482666	11.6566038131714	9.53361320495605	9.73539161682129	10.4531297683716	COL1A2	A0A087WTA8;P08123
12.8174524307251	13.2758378982544	13.121997833252	12.4709815979004	12.3780956268311	13.0134153366089	13.2547092437744	12.9063653945923	13.0716524124146	13.3041934967041	BCL2L13	A0A087WTL4;A0A087WX97;Q9BXK5
16.1843605041504	15.9571857452393	15.991961479187	16.1955490112305	15.9303216934204	16.0125484466553	16.0310974121094	15.9563646316528	15.990138053894	16.0137329101563	TMEM230	A0A087WTT2;Q5JWB9;Q96A57
13.3878011703491	14.0769109725952	14.6615076065063	14.4693841934204	14.3073778152466	14.4554147720337	14.2948303222656	13.930516242981	14.654748916626	13.7749948501587	UHRF1	A0A087WTW0;A0A087WVR3;Q96T88
15.531699180603	15.4006261825562	15.6081323623657	15.4345102310181	15.4881992340088	15.2990531921387	15.4870023727417	15.4381828308105	15.4716062545776	15.4222326278687	ERGIC2	A0A087WU02;Q96RQ1
15.6378955841064	14.9392595291138	14.5385513305664	15.3024444580078	15.0975217819214	14.7926645278931	9.87093830108643	14.1304960250854	13.5448503494263	14.5662899017334	MICOS10	A0A087WU07;Q5TGZ0
15.8340835571289	15.8284091949463	15.7873039245605	15.9728269577026	15.9100770950317	15.8843088150024	15.6400156021118	15.5515298843384	15.8008918762207	15.551323890686	MAGT1	A0A087WU53;Q9H0U3
14.4918947219849	14.7628631591797	14.8790941238403	14.8243741989136	14.811505317688	14.8348512649536	14.7849369049072	14.6390600204468	14.7801418304443	14.6186084747314	CTNNBL1	A0A087WUB9;Q8WYA6
17.5527439117432	17.4863243103027	17.5714950561523	17.4895324707031	17.5621109008789	17.4565753936768	17.2252731323242	17.1770133972168	17.4263668060303	17.4751720428467	SPCS2	A0A087WUC6;E9PL01;Q15005
16.3324241638184	16.455924987793	16.8117637634277	16.5359477996826	16.6571369171143	16.3955078125	16.7959613800049	16.2265281677246	16.7083587646484	16.3620471954346	HNRNPDL	A0A087WUK2;O14979
10.3728847503662	12.5563650131226	12.5986185073853	12.4295520782471	12.0700988769531	12.0095863342285	11.2635374069214	12.3541412353516	12.2415037155151	11.620078086853	TMCO3	A0A087WUP6;Q6UWJ1
13.9659147262573	13.1550645828247	13.3227376937866	13.1783008575439	12.7986450195313	13.0811386108398	13.5387344360352	10.8297119140625	13.0448398590088	13.265154838562	NAPRT	A0A087WUT5;G5E977;Q6XQN6
15.5924291610718	15.5211811065674	15.7694549560547	15.7850732803345	15.6687660217285	15.713210105896	15.8114423751831	15.7508039474487	15.6623773574829	15.538670539856	EIF5B	A0A087WUT6;O60841
14.3492813110352	14.4915990829468	14.7679023742676	14.0859928131104	14.5329275131226	14.4111404418945	14.5674848556519	14.1493349075317	14.4052419662476	14.6282844543457	IKBKG	A0A087WUW6;A0A087X0G7;A0A087X1B1;Q9Y6K9
15.5833978652954	15.9060583114624	15.9873142242432	15.9819755554199	15.9367713928223	16.1353874206543	16.2574100494385	15.4579563140869	15.9559135437012	16.0516510009766	;MYCBP	A0A087WV05;Q99417
16.156192779541	14.7940092086792	15.3135433197021	15.2717323303223	15.1522417068481	14.836404800415	15.2252807617188	15.2494373321533	15.060772895813	15.1899433135986	CEP43	A0A087WV25;O95684
13.3302507400513	15.11754322052	14.4699201583862	14.720440864563	15.3139667510986	15.125678062439	14.5872812271118	15.817289352417	14.4524564743042	15.035285949707	AK6	A0A087WVD7;A0A087WY94;Q9Y3D8
13.5228052139282	13.4898090362549	13.5270538330078	13.5463943481445	13.303731918335	13.3648748397827	13.5441102981567	13.6150350570679	13.4203042984009	13.3945150375366	COG1	A0A087WVI0;Q8WTW3
14.817497253418	13.5858888626099	13.8159790039063	14.2398691177368	13.7957096099854	14.3067121505737	14.3534803390503	14.1981353759766	14.0996522903442	14.5630340576172	PDLIM2	A0A087WVI1;Q96JY6
17.065637588501	17.0768852233887	17.1217002868652	17.1720123291016	16.9798984527588	17.0960063934326	16.9952735900879	17.0980033874512	17.0543460845947	16.9124507904053	MTHFD1L	A0A087WVM4;B7ZM99;Q6UB35
13.1471452713013	13.3238897323608	13.8916435241699	13.5901775360107	13.6729516983032	13.4970645904541	13.7493333816528	12.9305000305176	13.436502456665	13.3231744766235	FAT1	A0A087WVP1;Q14517
14.1123809814453	13.5025129318237	13.9441318511963	13.762092590332	13.6300487518311	13.1861591339111	13.8853912353516	13.3130893707275	13.6992101669312	13.0779066085815	PHF23	A0A087WVQ2;I3L0Y2;I3L4Q4;Q9BUL5
20.4202499389648	20.7906322479248	20.6572284698486	20.5875797271729	20.9906730651855	20.677526473999	20.5839824676514	20.8464756011963	20.7748394012451	20.7601909637451	CLTC	A0A087WVQ6;Q00610
15.1150159835815	14.9694814682007	15.0206632614136	15.0421667098999	14.5833139419556	14.3587417602539	14.3770322799683	14.4490203857422	14.9846343994141	14.5753450393677	ZMYND8	A0A087WVZ6;H7C4X9
15.353422164917	15.2861604690552	15.1314554214478	15.3293952941895	15.0884160995483	15.3608121871948	15.270414352417	15.338249206543	15.2614583969116	15.3590240478516	SH3GLB1	A0A087WW40;Q9Y371
15.8445682525635	14.9069938659668	14.8786334991455	12.568042755127	14.7867841720581	14.992301940918	14.3625564575195	14.92236328125	14.277850151062	14.7329988479614	ITIH3	A0A087WW43;E7ET33;Q06033
16.4883403778076	16.3920936584473	16.7273578643799	16.3597469329834	16.6503238677979	16.3622913360596	16.45924949646	15.9555559158325	16.2939300537109	16.0677375793457	SELENOI	A0A087WW58;Q9C0D9
10.4500617980957	12.5559043884277	12.2532539367676	12.233512878418	12.0672254562378	12.2819738388062	12.1339120864868	11.9011163711548	11.9378185272217	11.9634675979614	ARHGAP21	A0A087WW76;A0A452Q6Z5;A0A7P0TAS2;Q5T5U3
15.1719484329224	15.0651025772095	15.1126556396484	14.9505300521851	14.9529676437378	15.0279626846313	14.8269748687744	14.899938583374	15.0758972167969	14.8859605789185	LLGL1	A0A087WW77;Q15334
13.9919490814209	14.2116432189941	14.0295352935791	13.8515882492065	13.9327487945557	14.1248931884766	14.1617031097412	14.2676763534546	13.9575290679932	14.1443166732788	KIF1B	A0A087WWA3;O60333;Q4R9M9
14.0609178543091	13.8858165740967	13.9847106933594	13.9263381958008	13.8877553939819	13.6146068572998	13.7575235366821	13.7343082427979	13.7653322219849	13.7407302856445	POLD2	A0A087WWF6;F8W8R3;P49005
11.9775400161743	13.3714771270752	12.8903741836548	12.9303426742554	13.5413513183594	13.3318929672241	13.1647968292236	13.299952507019	13.1698417663574	12.8351402282715	GMPR2	A0A087WWM4;F8WAN9;H0YLV5;H0YMB3;H0YNJ6;Q9P2T1
14.741340637207	14.377124786377	14.706033706665	14.6555995941162	14.4975118637085	14.3401479721069	14.5462493896484	14.3145589828491	14.4717721939087	14.1482124328613	RBM15	A0A087WWP4;A0A494C001;A0A499FJY3;Q96T37
13.6146078109741	11.3232679367065	14.0633373260498	14.0621681213379	14.9241924285889	15.2932157516479	14.2016572952271	14.8010187149048	12.4536561965942	13.6948871612549	RSBN1	A0A087WWP8;Q5VWQ0
11.4891357421875	12.1440296173096	12.5357131958008	13.1759338378906	13.3833570480347	12.9063777923584	13.5875644683838	13.4176559448242	13.0611867904663	12.8905744552612	MAZ	A0A087WWR2;I3L2Z5;P56270
14.8758974075317	14.075758934021	14.7310762405396	14.6786060333252	14.4203519821167	14.4637422561646	14.5364923477173	14.3637218475342	14.1298809051514	13.6857643127441	THOC1	A0A087WWS1;Q96FV9
12.2649688720703	12.8009920120239	12.7019367218018	10.9109916687012	12.8649635314941	12.9053688049316	11.6273736953735	12.7764263153076	11.748363494873	13.1486225128174	TMEM237	A0A087WWU1;F2Z329;Q96Q45
20.1944618225098	19.9348697662354	19.8327121734619	19.9666213989258	19.8408718109131	19.9509677886963	19.9899215698242	19.7770156860352	19.9000587463379	19.81787109375	TPM3	A0A087WWU8
13.5164194107056	12.0453662872314	13.3357772827148	13.2112035751343	13.2314577102661	13.0472354888916	13.4071369171143	14.0958662033081	13.2261734008789	13.7719774246216	BCL10	A0A087WWW9;O95999
17.8529205322266	17.5987415313721	17.5651569366455	17.6796264648438	17.6320552825928	17.5258293151855	17.4091491699219	17.5542697906494	17.5290813446045	17.368688583374	TARDBP	A0A087WX29;Q13148
13.8476400375366	14.4397039413452	14.8143444061279	14.4876127243042	14.6434135437012	14.3486557006836	14.7918558120728	14.7581195831299	14.7919874191284	14.44162940979	SCAMP1	A0A087WXB0;O15126
15.3141298294067	15.5421667098999	15.7246246337891	15.6265573501587	15.5339527130127	15.3431072235107	15.4980955123901	15.4644365310669	15.5824489593506	15.3571128845215	NDUFA10	A0A087WXC5;A0A7I2V594;A0A7I2YQU0;E7ESZ7;O95299
10.6758918762207	11.5361356735229	12.270149230957	11.2774047851563	11.8251857757568	11.9551219940186	12.3054103851318	12.0955953598022	12.1987047195435	12.0309371948242	ZCCHC17	A0A087WXF8;A0A087WYV3;A0A0D9SEW3;Q9NP64
11.9761390686035	12.0376014709473	12.2426834106445	12.3676872253418	11.551474571228	12.7966051101685	12.2429370880127	11.8928871154785	11.8485670089722	11.5758771896362	FAM83D	A0A087WXK8;Q9H4H8
18.4207706451416	18.5912017822266	18.5276203155518	18.6350688934326	18.66916847229	18.6722812652588	18.4978504180908	18.2863254547119	18.5799465179443	18.5528583526611	RPL17;RPL17-C18orf32;RPL17;RPL17;RPL17	A0A087WXM6;A0A0A6YYL6;J3KRX5;J3QQT2;P18621
12.7227420806885	11.1903305053711	11.729998588562	12.170934677124	12.0401477813721	11.9172687530518	12.9905128479004	12.8253450393677	11.5991649627686	12.7510271072388	MTSS2	A0A087WXN9;Q765P7
12.229564666748	11.8979549407959	12.5797510147095	11.8875522613525	11.9624357223511	12.1611804962158	12.9269199371338	12.4719276428223	12.5261259078979	12.1427335739136	RNASEH2B	A0A087WXR7;A0A2R8Y6Q6;A0A2R8YCX2;A0A2R8YGP2;Q5TBB1
14.2487697601318	14.3022994995117	14.2053117752075	14.1009330749512	14.3087882995605	14.0064105987549	13.9093885421753	14.2215576171875	14.1072425842285	13.8828182220459	RMND1	A0A087WXU0;A0A2R8Y4J4;Q9NWS8
15.6761178970337	15.7036190032959	15.9257230758667	15.9435634613037	15.9026098251343	15.6517868041992	15.7283878326416	15.7047052383423	15.791862487793	15.7227745056152	ESYT2	A0A087WXU3;A0A499FIX8;A0FGR8;H7BXI1
11.3271865844727	10.6704053878784	11.6155557632446	12.1261491775513	12.0347270965576	12.1187114715576	11.68190574646	12.1486129760742	11.6236143112183	11.7877244949341	HEATR6	A0A087WXZ7;K7EIX2;Q6AI08
17.4072799682617	17.1787910461426	17.1324768066406	16.9970607757568	17.1616821289063	17.1311054229736	17.1368274688721	17.4923152923584	17.1265830993652	17.2406024932861	VTA1	A0A087WY55;Q9NP79
14.995888710022	14.5626783370972	14.5982627868652	14.3622913360596	14.4756031036377	13.8989582061768	13.8989486694336	14.2027835845947	14.129771232605	14.1643266677856	APOOL	A0A087WYF7;Q6UXV4
15.3914804458618	13.2115268707275	15.0478544235229	14.7936210632324	14.8046274185181	13.0437889099121	14.2996978759766	13.47922706604	13.6779928207397	13.255729675293	PDLIM3	A0A087WYF8;A0A2U3TZH4;Q53GG5
11.9208173751831	12.6016836166382	12.7035512924194	12.7530393600464	13.2563905715942	12.5857095718384	12.6482887268066	13.4257249832153	12.7673263549805	12.9926948547363	INTS11	A0A087WYI0;C9IYS7;C9J979;Q5TA45
14.5200958251953	14.5312871932983	14.4750270843506	14.5099697113037	14.3892889022827	14.4538555145264	14.3263425827026	14.5996961593628	14.3502388000488	14.5502872467041	POLD1	A0A087WYJ2;M0R2B7;P28340
12.7032680511475	13.5445146560669	12.8924856185913	13.1736354827881	12.7052803039551	13.4340143203735	12.82435131073	10.0796699523926	12.6352233886719	12.5597333908081	MED6	A0A087WYL7;G3V4A5;O75586
13.9845409393311	13.8260927200317	13.8885135650635	14.0578699111938	14.1838712692261	14.1805143356323	13.9747266769409	14.1998596191406	13.7228670120239	13.9862747192383	DHX29	A0A087WYN9;Q7Z478
14.3544778823853	14.5807867050171	12.6397657394409	14.4913139343262	14.3067150115967	14.5251388549805	14.0539598464966	14.2180633544922	13.9820203781128	14.3540954589844	SELENOH	A0A087WYP2;Q8IZQ5
14.4667282104492	14.2621622085571	14.1382818222046	14.2934532165527	14.112024307251	13.9752187728882	14.2042665481567	13.7339963912964	14.2653589248657	14.2027053833008	SRP19	A0A087WYR0;P09132
16.835563659668	16.9967555999756	16.7942199707031	16.8364067077637	16.998010635376	16.9515132904053	16.9102420806885	17.1296787261963	16.9272975921631	17.0605754852295	UGP2	A0A087WYS1;A0A7I2YQ74
13.8893260955811	14.2391729354858	13.6817770004272	14.030951499939	13.6395711898804	13.6532669067383	14.2315969467163	13.9692659378052	13.5035037994385	14.185338973999	METTL26	A0A087WYU2;Q96S19
16.7408771514893	16.6689643859863	16.7560482025146	16.6397399902344	16.9521865844727	16.6100902557373	16.1500434875488	16.6056518554688	16.6731472015381	16.5680294036865	SYNJ2BP-COX16;SYNJ2BP-COX16;SYNJ2BP	A0A087WYV9;A0A087X1F5;P57105
16.2456817626953	16.0740909576416	16.1066265106201	16.1132793426514	16.0905132293701	16.0961532592773	16.0878067016602	15.9383182525635	15.9958162307739	15.9266529083252	RAVER1	A0A087WZ13;E9PAU2
11.9725761413574	12.0576057434082	12.293381690979	12.517596244812	11.6434545516968	12.540638923645	12.4346256256104	12.4739017486572	12.613260269165	12.2800207138062	;ALG9	A0A087WZ62;Q9H6U8
10.4504652023315	10.809139251709	11.7598657608032	11.9187545776367	12.3545217514038	10.7775611877441	12.0119543075562	9.6285514831543	11.4379148483276	11.6016292572021	ARHGEF18	A0A087WZG4;A0A3B3IPE9;A0A590UK10;Q6ZSZ5
14.8812026977539	14.4865055084229	14.3817825317383	14.3362493515015	14.1591882705688	14.3719511032104	14.1640653610229	13.971417427063	14.4262952804565	13.8024482727051	CSNK1G2;CSNK1G2;CSNK1G3	A0A087WZK4;P78368;Q9Y6M4
15.2368154525757	14.8985843658447	14.754264831543	15.0463809967041	14.7122011184692	14.9451570510864	14.7955226898193	14.6196231842041	14.7638063430786	14.9135246276855	PHLDB1	A0A087WZL0;Q86UU1
15.2580690383911	14.7137012481689	14.730749130249	14.8470230102539	14.4853029251099	14.6908903121948	14.8117427825928	14.5121297836304	14.658899307251	14.5719022750854	RNASET2	A0A087WZM2;D6REQ6;D6RHI9;O00584
16.0970153808594	16.095344543457	16.1595191955566	16.104793548584	16.1296672821045	16.0603675842285	16.0671424865723	15.938570022583	16.0441341400146	15.9422283172607	IDH3B	A0A087WZN1;O43837
13.284743309021	13.1415996551514	13.5030546188354	12.7229719161987	13.8292007446289	13.1114158630371	13.2605104446411	13.5084409713745	13.2852821350098	13.145899772644	BRCC3	A0A087WZR3;A0A0D9SF50;H9KVA9;P46736
15.0072536468506	14.0482196807861	14.5478401184082	14.1679372787476	13.9101810455322	14.4089450836182	14.3895740509033	13.8012046813965	14.175817489624	14.7562608718872	METTL7B	A0A087WZT2;Q6UX53
16.1218318939209	16.4101524353027	16.1404132843018	16.3613433837891	15.891752243042	16.5131664276123	16.4097537994385	16.50071144104	16.0679149627686	16.4023189544678	BOLA2B;BOLA2	A0A087WZT3;Q9H3K6
12.1744594573975	12.0753135681152	12.8193922042847	12.1145534515381	11.866795539856	12.6919965744019	13.145339012146	11.741117477417	11.8848581314087	12.5222063064575	PPIP5K2	A0A087WZV0;H0Y9S9;O43314
14.1153526306152	14.027455329895	13.9020004272461	13.9586248397827	13.6919326782227	13.9598073959351	14.2595338821411	13.9802665710449	13.7219791412354	13.5576505661011	BCL9L	A0A087WZX0;Q86UU0
17.1256198883057	16.3772525787354	16.6483211517334	16.6791076660156	16.3548927307129	16.3280811309814	16.5030288696289	16.3908557891846	16.377908706665	16.3477020263672	NDUFB6	A0A087WZX2;O95139
13.5316772460938	12.2485427856445	12.3747825622559	12.5165100097656	14.3399639129639	14.0129661560059	14.0853700637817	14.4765615463257	14.2454414367676	13.8122434616089	CLN5;CLN5;CLN5;CLN5;CLN5;CLN5;;CLN5;CLN5	A0A087WZY0;A0A1B0GTR6;A0A1B0GTV7;A0A1B0GUE8;A0A1B0GV94;A0A1B0GWI2;A0A1B0GWJ7;A0A1C7CYZ2;O75503
14.315393447876	13.5087518692017	13.2234106063843	13.0008430480957	13.3683319091797	13.3613243103027	13.6675481796265	13.1116437911987	13.2989368438721	13.1256885528564	KIF3A	A0A087X011;E9PES4;J3KPF9;Q9Y496
16.8660526275635	16.8828945159912	16.9580612182617	16.9926128387451	16.9017562866211	16.7653636932373	16.8613185882568	16.896125793457	16.9090251922607	16.8396282196045	HYOU1	A0A087X054;A0A494C039;Q9Y4L1
12.1952438354492	12.4723854064941	12.6811256408691	12.5213432312012	12.0331678390503	12.1702394485474	12.4586906433105	12.6814994812012	12.3929300308228	12.1884002685547	SRCAP;SRCAP;;SRCAP	A0A087X0E3;A0A0A0MS59;A0A0C4DFX4;Q6ZRS2
13.5831985473633	13.7819538116455	13.8512353897095	13.7862129211426	12.5116672515869	13.5420398712158	13.6936902999878	12.6539735794067	13.4122009277344	13.161190032959	DDHD1	A0A087X0H7;A0A669KB51;A0A6E1W401;Q8NEL9
14.2839117050171	14.1166973114014	14.2304410934448	13.9864912033081	13.7697439193726	13.9671087265015	14.2505216598511	13.7678871154785	13.8611917495728	13.8017473220825	RBM26	A0A087X0H9;Q5T8P6
13.1162805557251	14.5028123855591	14.5191841125488	14.2623434066772	14.7958889007568	14.3286066055298	14.6890430450439	14.6794691085815	14.4413175582886	14.39280128479	CAB39	A0A087X0K1;Q9Y376
16.4932498931885	16.3941345214844	16.4653053283691	16.4587936401367	16.3856468200684	16.4338035583496	16.4818992614746	16.3478355407715	16.3949909210205	16.3709259033203	TJP1	A0A087X0K9;Q07157
15.4610185623169	14.9107532501221	14.9632415771484	15.0557537078857	14.8153467178345	14.8542680740356	14.7061386108398	14.723578453064	14.8894453048706	14.7454280853271	OXA1L	A0A087X0L7;J3KNA0;Q15070
14.2440767288208	14.9130115509033	14.7300357818604	14.6307592391968	14.4530048370361	14.5548639297485	14.687201499939	14.6419200897217	14.4053831100464	14.4381799697876	SLC4A1AP	A0A087X0M4
16.321798324585	16.2176723480225	16.103328704834	16.2649688720703	16.2991008758545	16.2559871673584	16.1621131896973	16.1860885620117	16.2490844726563	16.2408752441406	YTHDF3	A0A087X0Q1;Q7Z739
14.7447700500488	15.1056833267212	14.8043994903564	14.986930847168	14.8177490234375	15.265230178833	15.1412706375122	15.1768445968628	14.9256420135498	15.094313621521	SNX12	A0A087X0R6;Q9UMY4
13.8967866897583	13.3501815795898	12.6672649383545	12.9214496612549	12.4324836730957	13.1185111999512	12.2299699783325	13.0204210281372	12.7498788833618	12.6211290359497	COL6A1	A0A087X0S5;P12109
15.7749586105347	15.7236423492432	16.1043262481689	15.9407148361206	15.8562240600586	15.7326698303223	15.9186544418335	16.0316143035889	15.8469543457031	15.7550497055054	POLR1D	A0A087X0U2;A0A1B0GUZ5;P0DPB5;Q7Z776
15.5746335983276	15.0166826248169	15.4277544021606	15.3723134994507	15.153265953064	14.9700469970703	15.1257762908936	14.9401378631592	15.224871635437	14.8356513977051	ACOT2;ACOT1	A0A087X0W7;Q86TX2
15.8570127487183	15.6710996627808	15.6621313095093	15.5902013778687	15.5935716629028	15.6374988555908	15.6180515289307	15.8749370574951	15.652027130127	15.7648601531982	RELA	A0A087X0W8;Q04206;Q2TAM5
14.2313480377197	13.9289636611938	14.192346572876	14.3453722000122	14.0047941207886	14.3336181640625	14.1807241439819	13.8275384902954	14.0207033157349	14.2206535339355	OTUD6B	A0A087X0W9;Q8N6M0
20.1120948791504	19.4892272949219	19.5331897735596	19.6401519775391	19.3186149597168	19.4239559173584	19.432933807373	19.2658996582031	19.3421669006348	19.3075370788574	HNRNPM	A0A087X0X3;P52272
16.6680145263672	16.7088451385498	16.8182258605957	16.7696685791016	16.9112396240234	16.749963760376	16.6211833953857	16.9670104980469	16.6594486236572	16.7051544189453	NOMO1	A0A087X117;A0A0G2JN29;Q15155
15.7389831542969	15.7462854385376	15.782527923584	15.8310842514038	15.8467683792114	15.6816272735596	15.8240804672241	15.8201751708984	15.7686700820923	15.7405529022217	SEPTIN8	A0A087X142;A6NFQ9;A6NMH6;F8W8I8;Q92599
12.5978918075562	13.2197465896606	13.0623741149902	13.1661624908447	12.9336385726929	13.1118679046631	13.4030990600586	13.0759449005127	13.1454477310181	13.1613054275513	ATXN3	A0A087X1A8;A0A0A0MS38;A0A2R8Y3X7;D3VVH9;F5H211;G3V3R7;G3V4U9;P54252
15.2929630279541	14.9334678649902	15.169358253479	14.9399690628052	15.1553640365601	14.7823610305786	15.0316209793091	15.0625562667847	14.8248605728149	14.8269567489624	NDUFA5	A0A087X1G1;A0A7I2V2W4;A0A7I2V3L8;H7BYD0;Q16718
14.8352241516113	14.9331293106079	14.8253955841064	14.9087896347046	14.8615064620972	14.799373626709	14.9676837921143	14.5714874267578	14.7193307876587	14.8370370864868	ACAP2	A0A087X1H5;H7C3K3;Q15057
12.2688798904419	13.7640771865845	13.5294771194458	13.3043012619019	13.7448263168335	13.6818141937256	13.5804300308228	13.78955078125	13.5952434539795	13.4924440383911	COPS7B	A0A087X1P5;J3KQ34;J3QT73;Q9H9Q2
16.4119930267334	16.8666172027588	16.7751865386963	16.6994380950928	16.8922805786133	16.6854381561279	16.7262802124023	16.9905891418457	16.8035774230957	16.9950389862061	PSME2	A0A087X1Z3;Q9UL46
14.6581554412842	15.0335988998413	15.0484056472778	15.0113439559937	15.1129169464111	15.0654554367065	15.161169052124	15.4382190704346	15.0211124420166	15.1872987747192	CIP2A	A0A087X211;Q8TCG1
12.3821220397949	12.6084518432617	12.5392971038818	12.3436117172241	12.3640995025635	12.6859273910522	12.5235910415649	12.8134517669678	12.6399507522583	12.7581367492676	DLGAP4	A0A087X246;A0A0B4J2C2;F8WF49;Q9Y2H0
16.8631362915039	17.3902835845947	17.3646965026855	17.1407623291016	17.743013381958	17.2712993621826	17.2782211303711	17.6756629943848	17.494743347168	17.4419994354248	AP2B1	A0A087X253;P63010
14.2966375350952	14.5533599853516	14.2410593032837	14.4629135131836	14.5707778930664	14.1341819763184	14.3860902786255	13.5823087692261	14.3588314056396	14.4595947265625	MID1	A0A087X255;A0A6Q8PF94;C9J453;O15344
14.4767837524414	14.416784286499	14.5356311798096	14.6393537521362	14.4695873260498	14.5265598297119	14.5485811233521	14.4597692489624	14.4908590316772	14.6012287139893	WASHC4	A0A087X256;Q2M389
14.7199144363403	14.0632362365723	14.2360420227051	14.2104797363281	12.676441192627	14.3816947937012	14.0759010314941	13.640287399292	14.1380319595337	13.7164726257324	NRCAM	A0A087X2B3;C9JH43;C9JYY6;F8W775;Q92823
16.6907730102539	16.2116260528564	16.3880424499512	16.3527793884277	16.3302936553955	16.2006645202637	16.1773910522461	16.217700958252	16.2149105072021	16.1069393157959	MRPL45	A0A087X2D5;Q9BRJ2
14.6342191696167	15.0455570220947	14.8769903182983	14.8523502349854	14.8432540893555	14.9111824035645	14.9868049621582	14.9965925216675	15.1396932601929	15.0858316421509	SPAG9	A0A087X2D8
13.8333892822266	13.9183073043823	13.905198097229	13.8984785079956	13.6898221969604	14.0439357757568	14.044979095459	14.1599807739258	13.9138422012329	13.9512844085693	HECTD1	A0A087X2H1;Q9ULT8
17.5134334564209	17.6800193786621	17.6880683898926	17.6708335876465	17.6488170623779	17.6541690826416	17.6381874084473	17.73557472229	17.6786632537842	17.7009086608887	PSMC6	A0A087X2I1;P62333
12.9764108657837	12.7187099456787	13.8656969070435	12.3319482803345	12.2246713638306	12.2676181793213	14.0340576171875	12.2806615829468	12.7839965820313	12.444128036499	WDR20	A0A088AWN2;Q8TBZ3
14.5501556396484	14.5833892822266	14.469762802124	14.5337142944336	14.5006380081177	14.6884460449219	14.5792179107666	14.2448196411133	14.4610586166382	14.2400941848755	DOCK9	A0A088AWN3;A0A0A0MSY4;Q9BZ29
13.8044586181641	14.3999042510986	14.2520704269409	14.2678356170654	14.1554136276245	14.1511917114258	13.8732709884644	14.0598411560059	14.1066951751709	14.3461761474609	RNF114	A0A096LNV3;A0A096LP02;Q9Y508
13.0344343185425	11.9183797836304	12.8518629074097	12.2863922119141	11.7426357269287	12.8273487091064	12.7376537322998	11.9579029083252	11.9911394119263	11.9169883728027	ATRX	A0A096LNW1;P46100
15.9612693786621	16.5059509277344	16.3471870422363	16.3226108551025	16.4843463897705	16.4364604949951	16.4975814819336	16.6684093475342	16.4153289794922	16.4903144836426	ADSL	A0A096LNY6;A0A1B0GTJ7;A0A1B0GWJ0;A0A7P0T9A7;A0A7P0Z472;P30566
14.7501268386841	14.7811698913574	14.7409210205078	14.8513889312744	14.3494186401367	14.6555423736572	14.8531675338745	13.9563865661621	14.492467880249	14.4970140457153	PTRH1	A0A096LP22;Q86Y79
15.7847270965576	15.5944452285767	15.4888210296631	15.4954977035522	15.480188369751	15.6268682479858	15.7229976654053	15.7585020065308	15.5480813980103	15.7151584625244	AAK1	A0A096LP25
10.6425666809082	12.6831178665161	13.6108102798462	13.296498298645	12.4835624694824	13.1520795822144	13.124436378479	12.6023969650269	13.0782604217529	13.037184715271	TAF7	A0A096LPC3;Q15545
16.6617813110352	16.1719360351563	16.3297252655029	16.3859729766846	16.0200977325439	16.0742454528809	16.1818866729736	15.9982662200928	16.1085624694824	16.0600357055664		A0A096LPI6
11.7325668334961	12.5290870666504	12.6899290084839	12.5653038024902	12.711874961853	12.6996068954468	12.9473142623901	12.9209747314453	12.7679786682129	12.6640510559082	RTF2	A0A0A0MQR2;Q9BY42
15.7374114990234	15.7936697006226	15.7015581130981	15.7250757217407	15.5811738967896	15.6957521438599	15.5850877761841	15.7304344177246	15.5340061187744	15.6720390319824	POLR2E	A0A0A0MQR7;P19388
13.6582765579224	14.1640014648438	14.1428499221802	14.1235437393188	13.9603862762451	13.9933843612671	14.217324256897	14.1225242614746	14.1780071258545	14.2969799041748	PYCR3	A0A0A0MQS1;Q53H96
10.680567741394	11.2970933914185	12.0308294296265	11.8370037078857	11.3201379776001	11.7590827941895	12.3788814544678	10.1131801605225	12.3334732055664	11.2644739151001	CLASRP	A0A0A0MQS2;F5H0Q6;K7EP11;Q8N2M8
16.9966640472412	16.9565486907959	16.9222984313965	16.7944965362549	16.9367179870605	16.8306407928467	16.7872924804688	16.8597831726074	16.8710708618164	16.7907009124756	WDR18	A0A0A0MQU0;Q9BV38;U3KQC1
13.9068269729614	13.9270963668823	13.827244758606	13.8119592666626	14.1411266326904	14.063515663147	14.1450004577637	13.9082641601563	14.296929359436	14.0889987945557	SCLY	A0A0A0MQU4;H7C277;H7C3V9;Q96I15
17.3338527679443	15.6185817718506	16.3908672332764	15.4212951660156	16.3384132385254	17.1071033477783	16.8684196472168	17.2469120025635	17.0371932983398	16.9188213348389	FGF2	A0A0A0MQV6;P09038
18.343864440918	17.7945499420166	17.6709232330322	18.4131183624268	17.6918258666992	17.5960235595703	16.5180206298828	17.4070415496826	17.9062194824219	17.5943126678467	MYEF2	A0A0A0MQW0;A0A0A0MR39
15.5772857666016	14.9864768981934	15.2801008224487	15.3745784759521	15.3528919219971	14.9658498764038	15.8913688659668	15.4354753494263	15.2986488342285	15.3395853042603	MBNL1	A0A0A0MQX8;C9JP00;Q9NR56
13.1262340545654	12.9315967559814	12.745041847229	12.9058389663696	12.4141273498535	13.0883750915527	12.8757810592651	11.8017377853394	12.3060388565063	12.53528881073	CTDP1	A0A0A0MR03;A0A0J9YWB6;A0A0J9YWJ4;K7EJD2;Q9Y5B0
10.953893661499	11.5620098114014	11.9932775497437	12.0958404541016	11.5810060501099	11.8074388504028	12.2378873825073	11.8234987258911	11.8597841262817	11.5396213531494	USP19	A0A0A0MR08;A0A590UK03;O94966
14.1865825653076	14.2486295700073	13.9203853607178	14.0611457824707	13.9841547012329	14.1057319641113	13.9143896102905	14.0842943191528	13.742582321167	13.9882507324219	PTPN9	A0A0A0MR09;P43378
14.6327285766602	14.5111684799194	14.4597177505493	14.9302864074707	14.791374206543	14.3123655319214	14.4437980651855	14.8294792175293	14.4885549545288	14.6125564575195	GSTZ1	A0A0A0MR33;A0A0C4DFM0;G3V5T0
14.9744787216187	14.5419816970825	14.3959798812866	14.354362487793	14.1530771255493	14.1003475189209	13.9575424194336	13.728611946106	14.1343212127686	13.6748571395874	FADS1	A0A0A0MR51;H7C2V0;O60427
15.0898008346558	14.6485509872437	15.0084161758423	15.1645984649658	15.0039262771606	15.0350208282471	15.0655765533447	15.0328521728516	15.0753116607666	15.104549407959	ASAP1	A0A0A0MRE5;Q9ULH1
10.3136606216431	10.9839468002319	11.4038515090942	10.6883687973022	10.9859037399292	10.2768564224243	10.9038171768188	12.4116325378418	10.5787792205811	11.5728912353516	WDR47	A0A0A0MRE6;O94967
12.1352481842041	12.0373067855835	12.2382555007935	12.1048860549927	12.242169380188	12.533031463623	13.0596675872803	10.2632322311401	12.1838312149048	12.6297969818115	PLCG2	A0A0A0MRF9;P16885
14.0891981124878	13.9567966461182	14.3306245803833	14.2000188827515	14.2066192626953	14.2697992324829	14.3078384399414	14.0465307235718	13.9581394195557	13.8831777572632	GPALPP1	A0A0A0MRI1;Q8IXQ4
15.4738645553589	15.5547561645508	15.5338773727417	15.3631973266602	15.3610229492188	15.419340133667	15.492561340332	15.3167924880981	15.3318014144897	15.172477722168	CDC42BPA	A0A0A0MRJ0;Q5VT25
17.6238689422607	17.9399166107178	17.6693630218506	17.765193939209	17.8111839294434	17.971248626709	18.047721862793	17.6837902069092	17.8769207000732	18.0552959442139	PCMT1	A0A0A0MRJ6;F6S8N6;P22061
14.9846534729004	15.2740936279297	15.2802629470825	15.2637023925781	15.289999961853	15.2470045089722	15.3489780426025	15.3818578720093	15.3203372955322	15.3776874542236	MYO6	A0A0A0MRM8
15.8838424682617	15.3121128082275	15.6574325561523	15.8088054656982	15.2901840209961	15.732364654541	15.6191959381104	15.446138381958	15.3176202774048	15.3094997406006	NOLC1	A0A0A0MRM9
17.5212631225586	17.4207057952881	17.5712757110596	17.423713684082	17.5423717498779	17.3819236755371	17.3798274993896	17.255895614624	17.5197772979736	17.3970737457275	SMARCA1	A0A0A0MRP6;B7ZLQ5;P28370
15.6241569519043	15.7621812820435	15.9586162567139	15.7966318130493	16.213342666626	15.9253959655762	15.4868364334106	16.1209583282471	15.7658576965332	15.7707033157349	SNRPC	A0A0A0MRR7;P09234
16.7626457214355	16.5344982147217	16.3977661132813	16.5276489257813	16.2845230102539	16.4530258178711	16.5476703643799	16.5354423522949	16.4604682922363	16.5081825256348	ABI1	A0A0A0MRT6;B6VEX4;Q8IZP0
12.4960441589355	12.8435792922974	13.1261653900146	13.0448322296143	12.8987684249878	12.58127784729	13.063328742981	12.7165508270264	12.8823089599609	12.6720962524414	MARK2	A0A0A0MRU9;A0A7I2YQR3;E7ETY4;E9PC69;Q7KZI7
14.7391862869263	14.0217514038086	14.4763803482056	14.2714357376099	14.2128820419312	14.5039339065552	14.5071363449097	14.4223718643188	14.4808626174927	13.920841217041	NFIB	A0A0A0MRX8;A0A1B0GU97;A0A1B0GW37;A0A1B0GWI9;A0A1B0GWJ4;A0A2R8Y7V8;O00712;Q5VW26;Q5VW27;Q5VW30;U3KQE8
0.878047525882721	10.7451791763306	10.5329236984253	10.2070388793945	8.91207313537598	10.6609535217285	11.8904361724854	9.67518997192383	10.1778478622437	8.85448455810547	TNIP1	A0A0A0MRZ4;E7EMV7;E7EW15;Q15025
14.866322517395	15.1203413009644	14.9285850524902	15.0861358642578	15.1662731170654	15.1448831558228	15.1293201446533	15.3861103057861	15.0922632217407	15.2811937332153	CASP8	A0A0A0MS31;Q14790
14.588228225708	14.3684501647949	14.6753158569336	14.7241621017456	14.514404296875	15.0337915420532	14.2742481231689	14.5262365341187	14.3553276062012	14.407735824585	COG4	A0A0A0MS45;A0A6I8PIQ6;J3KNI1;Q9H9E3
17.9583263397217	18.1962451934814	17.9288940429688	17.9659862518311	18.1464900970459	18.1783771514893	18.3054161071777	18.4287986755371	18.270580291748	18.4101142883301	GSN;GSN;;GSN	A0A0A0MS51;A0A0A0MT01;GELS_HUMAN;P06396
13.5682134628296	13.2662725448608	13.0245504379272	13.1343879699707	12.6634664535522	13.2323331832886	13.2988290786743	11.9357023239136	12.4195575714111	12.9620361328125	MBD1	A0A0A0MS90;Q9UIS9
13.9138250350952	13.4223022460938	13.4667930603027	13.8689813613892	13.857967376709	13.5160884857178	13.6813659667969	13.5423927307129	13.4623384475708	13.3506631851196	EIF4G3	A0A0A0MSA7;A0A0U1RQK7;O43432
16.1685924530029	15.951117515564	16.176851272583	16.1775932312012	16.1707897186279	15.9315090179443	15.9384078979492	15.9033327102661	15.9564943313599	15.81605052948	PVR	A0A0A0MSA9;A0A0C4DG49;P15151
15.4548606872559	15.5510110855103	15.5449924468994	15.6214551925659	15.4676704406738	15.4613256454468	15.5093250274658	15.4860935211182	15.4204483032227	15.5157051086426	EXOC7	A0A0A0MSB8;Q9UPT5
14.858344078064	14.9177026748657	14.7872323989868	14.9723520278931	15.1259965896606	14.9298620223999	14.3695096969604	14.9705686569214	14.5891914367676	14.7647256851196	LDAH	A0A0A0MSH6;B5MCU4;B5MDU6;C9JHU6;C9JUM0;Q9H6V9
21.7981395721436	21.7701034545898	21.5290069580078	21.5698509216309	21.9046096801758	21.7958564758301	21.6729373931885	22.1517906188965	21.7453899383545	21.9397563934326	PRDX1;;PRDX1	A0A0A0MSI0;PRDX1_HUMAN;Q06830
14.137583732605	14.20911693573	14.1974582672119	14.2421445846558	14.1592960357666	14.2395210266113	14.3955316543579	14.0578336715698	14.1857976913452	14.1085653305054	PHC2	A0A0A0MSI2;B3KPJ4;Q8IXK0
12.2294387817383	10.6871395111084	11.8038358688354	10.2566022872925	10.9680624008179	11.7267189025879	11.2639122009277	11.3629732131958	10.7066106796265	11.7564840316772	NOL8	A0A0A0MSJ1;F5GWN9;F5H101;F8WE42;Q76FK4
15.660737991333	16.1247425079346	15.953724861145	15.8017768859863	16.1470832824707	16.1158752441406	16.2565174102783	16.4269599914551	16.1261692047119	16.0663623809814	CDK18	A0A0A0MSJ6;D6RA44;Q07002
18.8842926025391	18.4675960540771	18.5981521606445	18.6090106964111	18.3196544647217	18.3913650512695	18.4776992797852	18.356388092041	18.3261833190918	18.296365737915	TOR1AIP1	A0A0A0MSK5;Q5JTV8
12.5740175247192	11.9536275863647	12.3682117462158	12.4647436141968	12.3214511871338	11.8897066116333	12.881628036499	12.6891536712646	12.5640573501587	12.5132970809937	ARHGAP5	A0A0A0MSK6;Q13017
19.7060489654541	19.8737850189209	19.6905651092529	19.5749244689941	19.8521347045898	19.8698043823242	20.0254821777344	19.9352531433105	19.9373111724854	20.0363845825195	AKR1C3	A0A0A0MSS8;P42330
11.75279712677	11.6496324539185	12.1009855270386	11.521842956543	12.0070724487305	11.3004331588745	12.2670888900757	10.6956424713135	12.2840356826782	11.7532596588135	SLC4A7	A0A0A0MST8;C9JRP1;E9PFN4;Q9Y6M7
17.2758140563965	16.6466503143311	16.8128528594971	17.0357456207275	16.5695781707764	16.5975074768066	16.7788486480713	16.3933048248291	16.7912082672119	16.8623695373535	TAPBP	A0A0A0MSV9;A0A0G2JH37;A0A0G2JKZ1;A2AB90;O15533
16.1843566894531	16.5502910614014	16.3444156646729	16.3480529785156	16.5149307250977	16.5897045135498	16.690034866333	16.7346687316895	16.4066944122314	16.7089614868164	PITPNB	A0A0A0MSW4;P48739
13.989631652832	13.3108129501343	13.2283868789673	13.4932975769043	13.3053951263428	12.7598934173584	13.396656036377	11.9253463745117	13.359748840332	12.8403234481812	TK2	A0A0A0MSY7;A0A7P0MLU2;H3BP77;O00142
14.6432600021362	14.0139188766479	14.1977291107178	14.2906064987183	13.7326078414917	13.8710384368896	14.1004590988159	13.4344425201416	14.0814733505249	13.9163684844971	FDXR	A0A0A0MSZ4;A0A0A0MT64;A0A0A0MTN9;A0A0C4DFN8;A0A0C4DGN7;J3QQX3;P22570
14.4538822174072	14.7009706497192	14.5535087585449	14.498929977417	13.8422031402588	13.965859413147	14.3382844924927	13.015552520752	14.1178121566772	14.1197118759155	NFYC	A0A0A0MT00;E9PI99;Q13952;Q5T6K5;Q5T6K7
14.1584997177124	14.8974990844727	14.8231744766235	14.4389038085938	15.1859292984009	14.6799602508545	14.6322193145752	14.2944469451904	14.9832935333252	14.2913913726807	LIPA	A0A0A0MT32;P38571
14.9037075042725	15.3988084793091	15.3009004592896	14.9592161178589	15.4507598876953	14.9901943206787	15.0962572097778	14.7631988525391	15.0589761734009	14.7887573242188	SCAF8	A0A0A0MT33;Q9UPN6
13.169548034668	13.0980682373047	13.3925457000732	13.4399738311768	12.5866079330444	12.7563457489014	13.2170419692993	12.7112817764282	12.9595251083374	12.7243528366089	MPHOSPH8	A0A0A0MT47;Q99549
16.5979290008545	16.4693832397461	16.5206642150879	16.5512943267822	16.318431854248	16.1507587432861	16.2492561340332	16.3186492919922	16.3087615966797	16.2414665222168	IVD	A0A0A0MT83;P26440
14.8628482818604	15.0657291412354	15.0971117019653	15.1825618743896	15.1519565582275	15.0154705047607	14.9691877365112	14.8870143890381	15.0012950897217	14.9349222183228	WDR36	A0A0A0MTB8;Q8NI36
15.0514478683472	15.2196025848389	15.3323545455933	15.198468208313	15.3220596313477	15.2088212966919	15.2121028900146	15.2104949951172	15.389307975769	15.2205791473389	RNF213	A0A0A0MTC1;A0A0A0MTR7;Q63HN8
12.2717361450195	12.1564865112305	12.3089876174927	12.2027835845947	11.7887659072876	12.1043014526367	12.3684873580933	11.6539878845215	11.8203573226929	12.1317090988159	TUSC3	A0A0A0MTC2;D6RA37;D6RDV0;D6RIY7;Q13454
12.572151184082	12.3318510055542	12.1455268859863	11.8167028427124	12.5481462478638	10.2522525787354	11.9188833236694	12.5520057678223	12.1863212585449	12.4086923599243	VARS2	A0A0A0MTG1;A0A0G2JIA5;A0A0G2JL52;A0A140T8Y0;A0A140TA35;A0A140TA36;A0A140TA40;A0A140TA45;B4E0K6;B7ZL25;Q5ST30
16.884147644043	16.9419097900391	16.7920818328857	16.8566436767578	16.8638954162598	16.9553661346436	16.8071804046631	17.0673408508301	16.8663139343262	17.0007877349854	ILK	A0A0A0MTH3;Q13418
13.4119243621826	12.5299482345581	12.9336824417114	12.7774829864502	12.9001340866089	12.7598304748535	13.0947532653809	12.8614645004272	12.8356332778931	12.7824850082397	BTAF1	A0A0A0MTH9;O14981
12.9939165115356	14.1026306152344	13.4323921203613	14.1671009063721	14.1849737167358	14.6082992553711	13.2815790176392	14.465892791748	13.6224889755249	14.219856262207	DHCR24	A0A0A0MTI1;Q15392
18.1951923370361	18.0479888916016	18.223518371582	18.2003650665283	18.2548828125	18.0163860321045	17.8873844146729	18.1943397521973	18.0743179321289	18.0623683929443	NCEH1	A0A0A0MTJ9;Q6PIU2
12.3192615509033	12.0539436340332	13.054105758667	12.4104766845703	12.4595432281494	12.3173599243164	12.7962141036987	12.0054702758789	12.4150228500366	11.6849298477173	RIPOR1	A0A0A0MTL6;H3BQI5;H3BSV5;Q6ZS17
15.4743747711182	15.7817869186401	15.7949647903442	15.616382598877	16.1118755340576	15.7489795684814	15.8115339279175	15.6578540802002	15.8973360061646	15.8626441955566	CUL2	A0A0A0MTN0;Q13617
15.8081836700439	16.0392551422119	16.0114440917969	15.9231576919556	16.4743881225586	15.8511991500854	15.7498807907104	16.0536651611328	15.9282732009888	15.8915138244629	ATP5MJ	A0A0A0MTQ5;G3V556;P56378
16.1818027496338	16.4513816833496	16.5477409362793	16.3393936157227	16.7495937347412	16.3876266479492	16.3077239990234	16.6186237335205	16.5105304718018	16.5112895965576	TMED7-TICAM2;TMED7	A0A0A6YYA0;Q9Y3B3
14.5594921112061	14.0325145721436	13.7775087356567	14.1333894729614	13.0380764007568	14.0521087646484	13.9040307998657	12.932713508606	12.853006362915	13.7081327438354	CCDC7	A0A0A6YYA4;Q96M83
14.6261148452759	14.9416971206665	14.675332069397	15.0144653320313	14.7945079803467	14.8395338058472	14.9074220657349	14.4799909591675	14.8405733108521	14.4167881011963	RPS6KA4	A0A0A6YYC0;E9PJN1;O75676
14.2432203292847	13.5704574584961	14.0803556442261	14.124303817749	13.9400901794434	13.9564456939697	14.1793375015259	13.761812210083	14.0368061065674	13.6677341461182	ZFP91-CNTF;ZFP91	A0A0A6YYC7;Q96JP5
14.7530527114868	14.7953653335571	14.8643703460693	14.8446931838989	15.2114334106445	14.5072164535522	15.1789960861206	14.1898603439331	14.7492341995239	15.0203161239624	C15orf38-AP3S2;ARPIN	A0A0A6YYH1;Q7Z6K5
16.5983486175537	16.3571472167969	16.55397605896	16.5804138183594	16.4272651672363	16.3825263977051	16.3211116790771	16.170690536499	16.1523838043213	16.0904693603516	PPAN-P2RY11;PPAN-P2RY11;PPAN	A0A0A6YYI3;A0A0B4J1V8;Q9NQ55
15.7466926574707	16.756763458252	16.4608879089355	16.1182823181152	16.5658378601074	16.1593399047852	16.4232788085938	16.6803188323975	16.2677211761475	16.3523960113525	CORO7-PAM16	A0A0A6YYL4
11.8990936279297	10.9843788146973	12.1182041168213	12.2696685791016	11.0767574310303	11.7158756256104	11.9004344940186	11.1893444061279	11.3590068817139	11.0536947250366	BIRC5	A0A0B4J1S3;H3BLT4;O15392
0.715961039066315	12.2923488616943	11.9483480453491	12.1161155700684	11.3756122589111	10.9388608932495	11.94215965271	9.47169494628906	11.7397680282593	12.0502243041992	PI4KB	A0A0B4J1S8;E9PL47;F8W860;Q9UBF8
13.0593242645264	12.9547252655029	13.1289386749268	13.1324605941772	13.1185579299927	13.2916994094849	13.0772085189819	12.9508409500122	12.8915338516235	12.6958847045898	HELLS	A0A0B4J1V9;Q9NRZ9
16.0276393890381	16.6901531219482	16.4947490692139	16.5140075683594	16.8037757873535	16.7438659667969	16.5431423187256	16.6309661865234	16.6933326721191	16.7609939575195	NAA15	A0A0B4J1W3;Q9BXJ9
20.0159320831299	19.4708480834961	19.5969085693359	19.6415615081787	19.374828338623	19.5276279449463	19.4832458496094	19.2649917602539	19.4591274261475	19.3215866088867	SRSF7	A0A0B4J1Z1;C9JAB2;Q16629
12.9633588790894	12.6670684814453	13.2044763565063	13.3313045501709	13.207179069519	12.9199991226196	13.21946144104	13.4580326080322	12.7579784393311	13.3813133239746	;RNF31;RNF31;RNF31	A0A0B4J293;H0YKX0;H0YMG4;Q96EP0
10.9401082992554	11.9621362686157	12.3285369873047	11.7790937423706	12.1233072280884	11.9757699966431	12.0896530151367	12.4477882385254	12.5724658966064	12.2771778106689	;SHPK	A0A0B4J2A0;Q9UHJ6
17.6941509246826	17.9166889190674	17.6762218475342	17.8983669281006	17.6160430908203	17.9044933319092	17.8430404663086	17.2566413879395	17.7955780029297	17.8538627624512	RPS15	A0A0B4J2B4;K7ELC2;K7EM56;P62841;S4R417
17.6015796661377	17.9340705871582	17.5360469818115	17.8482112884521	17.6109771728516	18.0240306854248	17.7254219055176	18.1538257598877	17.5838527679443	17.9117107391357	TPT1	A0A0B4J2C3;P13693;Q5W0H4
14.4457378387451	14.5501546859741	14.6608390808105	14.6497468948364	14.6586771011353	14.2854871749878	14.5488967895508	14.6468267440796	14.4774980545044	14.273307800293	LOC102724159;PWP2	A0A0B4J2E5;Q15269
12.5245590209961	12.0514974594116	12.115514755249	13.0508413314819	11.6953916549683	11.7281370162964	13.0013151168823	12.4192323684692	11.7299423217773	12.5459489822388	MECOM	A0A0C3SFZ7;E7EUL6;Q03112
14.2247791290283	14.1242942810059	14.2240695953369	14.2937517166138	14.0914278030396	14.1830739974976	13.9570302963257	14.1852264404297	14.1348009109497	13.9839773178101	CYP51A1	A0A0C4DFL7;Q16850
15.0391521453857	15.3505887985229	15.588586807251	15.2214384078979	15.6281337738037	15.1439046859741	15.2649431228638	15.4035139083862	15.4850759506226	15.3076953887939	TM9SF4	A0A0C4DFM1;Q92544
11.7459182739258	11.6782283782959	12.0471448898315	12.2471313476563	11.8284578323364	12.252067565918	11.8959064483643	11.7964086532593	12.186842918396	11.9772415161133	TUT4	A0A0C4DFM7;E9PKX1;E9PKY2;Q5TAX3
10.7543601989746	7.47843790054321	10.5711669921875	10.2478590011597	11.2560586929321	10.2403955459595	10.8867120742798	11.0988254547119	8.89576530456543	11.5616331100464	SPRY4	A0A0C4DFS6;Q9C004
18.3763637542725	18.1432781219482	18.3294200897217	18.3101272583008	18.1663608551025	18.0752582550049	18.2145690917969	18.1421775817871	18.1847534179688	18.1363563537598	DLG1	A0A0C4DFT3;A0A590UJ08;A0A590UJD9
15.1470518112183	14.9531917572021	14.9687757492065	14.9963941574097	14.8552217483521	14.8965349197388	15.0441331863403	14.8442754745483	14.9051761627197	14.7369108200073	NELFA	A0A0C4DFX9;Q9H3P2
13.9536895751953	13.7808742523193	14.4714221954346	14.0741834640503	14.1928701400757	13.5815916061401	14.2916221618652	14.2469434738159	14.2500534057617	13.8422679901123	GPRC5C	A0A0C4DFY5;A8MXZ4;Q9NQ84
16.8456573486328	15.8284873962402	16.0093116760254	15.0751667022705	15.4043741226196	15.7209129333496	16.9650726318359	17.1493625640869	17.039924621582	16.9165515899658	ARSA	A0A0C4DFZ2;P15289
20.3812198638916	20.5828838348389	20.4065036773682	20.429988861084	20.6435680389404	20.6659832000732	20.3934841156006	20.1861877441406	20.5577754974365	20.5244274139404	RPSA	A0A0C4DG17;C9J9K3;P08865
15.582181930542	15.3077764511108	15.2303848266602	15.4102716445923	15.1321439743042	15.2860727310181	15.2043418884277	14.9954948425293	15.1386613845825	15.2954187393188	ABI2	A0A0C4DG21;A0A7D9NKC8;E7EP65;E7EW77;F8WAL6;Q9NYB9
13.5124111175537	13.3974208831787	13.7743425369263	13.9013471603394	13.2092580795288	13.7517881393433	13.8785123825073	12.950722694397	13.2086668014526	13.1638174057007	ARL6IP4	A0A0C4DG62;F5GYV5;F8WCT1;H7BZV4;Q66PJ3
11.3701791763306	12.9550676345825	14.2482967376709	13.5720186233521	13.6170778274536	13.5073347091675	13.4870567321777	11.5838928222656	13.5393505096436	13.2803554534912	PUM2	A0A0C4DG68;Q8TB72
11.7339849472046	11.3977956771851	12.296895980835	12.104681968689	11.5856256484985	10.9439487457275	12.3373327255249	11.7149410247803	11.7487955093384	11.6524896621704	ZSCAN18	A0A0C4DG78;Q8TBC5
14.4551734924316	14.4788808822632	14.4957265853882	14.2775297164917	14.0646114349365	14.0769834518433	14.3115396499634	14.3946189880371	14.2754592895508	14.3989944458008	POU2F1	A0A0C4DG88;P14859
17.8250160217285	17.2004413604736	14.3833789825439	15.9452419281006	11.313214302063	16.7158260345459	11.6919507980347	16.5437641143799	10.3700122833252	11.3393878936768	DDX46	A0A0C4DG89
11.1296586990356	11.4914894104004	12.5364856719971	12.6154308319092	11.0714807510376	11.2517147064209	12.7807865142822	12.6476097106934	12.0096063613892	10.8192949295044	NME6	A0A0C4DG91;A0A2R8Y547;A0A2R8Y7V2;C9J9V6;C9JQB1;O75414
12.7548866271973	13.3213005065918	13.6108846664429	13.6469631195068	13.3026552200317	13.2398023605347	13.3676509857178	13.1840105056763	13.495325088501	13.0297336578369	THOC2	A0A0C4DG98;Q8NI27
18.0197601318359	17.6066093444824	17.63303565979	17.56174659729	17.5327339172363	17.4563598632813	17.5083160400391	17.4900150299072	17.5215892791748	17.4927520751953	ECI2	A0A0C4DGA2;O75521
13.2572050094604	13.856276512146	13.7479076385498	13.7052049636841	13.3054676055908	12.9740905761719	13.4011144638062	13.5118570327759	13.4730424880981	13.2844114303589	HLTF	A0A0C4DGA6;Q14527
20.4911308288574	19.6758193969727	18.7383632659912	18.9584503173828	19.286283493042	19.4562644958496	18.2118453979492	19.1925830841064	18.9170951843262	19.1311416625977	ALB;;ALB	A0A0C4DGB6;ALBU_HUMAN;P02768
13.1996974945068	12.5737199783325	12.1941137313843	12.170711517334	12.712306022644	12.0817050933838	12.5930728912354	12.6321172714233	12.6383333206177	12.1924848556519	STX3	A0A0C4DGE4;A0A0J9YW33;A0A286YF28;Q13277
15.4981374740601	15.5313272476196	15.6397361755371	15.5027599334717	15.6260433197021	15.5584173202515	15.6202163696289	15.4957885742188	15.5141916275024	15.4855937957764	PACSIN3	A0A0C4DGG1;Q9UKS6
16.8142890930176	16.8567161560059	16.9011669158936	16.8719520568848	16.8175754547119	16.7589263916016	16.7293376922607	16.7338962554932	16.8003463745117	16.6961364746094	CHD4	A0A0C4DGG9;A0A2R8Y212;A0A2R8Y425;A0A2R8Y521;A0A2R8Y5J0;A0A2R8YFD8;A0A2R8YFK9;A0A2U3TZM0;F5GWX5;Q14839
14.2456026077271	12.0303602218628	12.7728490829468	14.5603723526001	15.0644817352295	14.671594619751	14.8635997772217	15.0931224822998	14.9575242996216	14.9190006256104	CD276	A0A0C4DGH0;Q5ZPR3
11.3848142623901	12.7309188842773	12.9834356307983	12.5760383605957	12.177074432373	12.0308103561401	12.8113508224487	11.986499786377	12.7178792953491	12.0453939437866	KIFC3	A0A0C4DGM9;B7Z896;F5H3M2;Q9BVG8
15.1641683578491	14.8152599334717	14.6642713546753	14.8944940567017	14.4186239242554	14.4950942993164	14.7057075500488	14.7343702316284	14.5610799789429	14.6694412231445	GIT1	A0A0C4DGN6;J3QRU8;Q9Y2X7
15.9454765319824	15.6878938674927	15.9807043075562	15.7421426773071	15.9124889373779	15.3383769989014	15.7057781219482	15.8174343109131	15.7883911132813	15.4728164672852	NLRP13	A0A0C4DGQ4;Q86W25
14.6975440979004	14.8003768920898	14.8375797271729	14.7183198928833	14.7497005462646	14.663875579834	14.9374628067017	14.7751035690308	14.7193908691406	14.5985622406006	RPRD1A	A0A0C4DGQ6;Q96P16
10.8668298721313	11.4615592956543	11.0567150115967	11.642505645752	11.3498821258545	12.1848201751709	11.297324180603	10.8261270523071	11.4694156646729	11.5559911727905	EML2	A0A0C4DGQ7;C9JRL6;K7EII6;K7EIK7;K7EKG3;K7ELI8;O95834
12.75710105896	13.5141668319702	13.762001991272	13.6966857910156	13.6789331436157	13.4344177246094	13.4656591415405	13.5696477890015	13.5813436508179	13.5999345779419	DHRS7B	A0A0C4DGQ8;Q6IAN0
18.1527538299561	18.3650226593018	18.3187160491943	18.2491703033447	18.5031089782715	18.2733745574951	18.0469188690186	18.3435535430908	18.3200969696045	18.3432598114014	DDOST	A0A0C4DGS1;P39656
14.5331172943115	15.4841241836548	15.375509262085	14.7294406890869	13.600866317749	15.3207874298096	15.6153192520142	15.7656011581421	15.58740234375	15.495213508606	CEPT1	A0A0C4DGS9;Q9Y6K0
11.8935785293579	11.2215757369995	10.8936548233032	11.7143182754517	12.4136953353882	10.8113994598389	11.7771091461182	11.7419385910034	11.6251955032349	11.9415483474731	IQSEC1	A0A0C4DGT3;A0A2R8Y695;A0A2R8Y7T6;A0A3B3IRZ4;A0A3B3IU98;Q6DN90
15.399266242981	15.3574066162109	15.4869432449341	15.5716638565063	14.8740615844727	14.7336053848267	15.3429260253906	15.3099164962769	15.4112901687622	15.3642673492432	LAMTOR5	A0A0C4DGV4;E9PLX3;O43504;R4GMU8
12.1932582855225	11.4131317138672	12.7827177047729	12.4376192092896	12.3291082382202	12.3869495391846	12.9878063201904	12.1478471755981	12.4024658203125	12.6222400665283	NDFIP2	A0A0C4DGW0;A0A3B3IRK3;B4DGY6;H7C5F7;Q9NV92
14.0042085647583	14.4332160949707	14.7627763748169	14.4588222503662	14.7117300033569	14.4900312423706	14.6015281677246	14.6451120376587	14.7497911453247	14.5244340896606	CUL1	A0A0C4DGX4;A0A590UJ50;Q13616
14.0579071044922	13.9523591995239	13.7128286361694	14.0651922225952	14.125358581543	14.0411319732666	13.758129119873	14.1084213256836	14.2173643112183	14.2028636932373	POFUT2	A0A0C4DGX7;H7C2T5;Q9Y2G5
11.2164058685303	14.0782060623169	13.2204170227051	13.5642585754395	14.0892839431763	13.8693151473999	13.6915273666382	12.5499267578125	13.2641935348511	13.5888299942017	ENOPH1	A0A0C4DGY8;D6RA00;Q9UHY7
13.6123485565186	13.1384582519531	13.7299823760986	13.6138677597046	12.6645030975342	12.1737089157104	13.5538854598999	12.4138154983521	12.7528390884399	13.3977432250977	BET1L	A0A0C4DH16;B8ZZS0;E9PHY4;H7BXT7;Q9NYM9
14.2887887954712	14.0439481735229	14.3115863800049	14.162540435791	14.2303409576416	14.1435594558716	14.3022756576538	14.2529802322388	14.245997428894	14.0671539306641	CDK11B	A0A0D9SEI3;A0A0D9SEN2;A0A0D9SER5;P21127
15.4854164123535	14.7531442642212	15.3786287307739	15.1702194213867	14.7226076126099	14.0582733154297	14.9085750579834	13.467399597168	14.4730024337769	13.7164554595947	SRSF4	A0A0D9SEM4;Q08170
13.5710334777832	13.5469923019409	13.5028600692749	13.5447034835815	13.0327482223511	13.4883842468262	13.6997194290161	13.3109264373779	13.1432428359985	13.1601266860962	TLE3	A0A0D9SES8;H0YKN8;H0YKT5;H0YL70;H0YNT2;Q04726
15.6564607620239	15.158164024353	15.2351198196411	15.3721408843994	15.1075296401978	15.1947975158691	15.2319822311401	15.198392868042	15.2417449951172	15.1722602844238	RANBP10	A0A0D9SEU5;Q6VN20;R4GMX8
14.6235857009888	14.3929767608643	14.2405405044556	14.2342529296875	14.2155227661133	14.3138580322266	14.4480094909668	14.3460140228271	14.0319185256958	14.1881647109985	MAP4K4	A0A0D9SEY1;E7EN19;E7ENQ1;G3XAA2;G5E948;H7C360;O95819
19.3738765716553	19.4598064422607	19.4568614959717	19.4361476898193	19.5803813934326	19.5143795013428	19.4801502227783	19.5954437255859	19.5187911987305	19.4617118835449	DDX3X	A0A0D9SF53;A0A0D9SFB3;A0A0D9SG12;A0A2R8Y4A4;A0A2R8YF78;A0A2R8YFS5;O00571
12.5613975524902	13.0656900405884	13.2498998641968	13.0439500808716	13.8773374557495	12.5853576660156	13.3480548858643	13.8399677276611	13.3781099319458	13.1974515914917	SPTAN1	A0A0D9SF54
13.1026067733765	13.3071422576904	13.8242340087891	13.713680267334	13.4050188064575	13.49915599823	13.6855850219727	13.3436889648438	13.5234422683716	13.2822494506836	PKP4	A0A0D9SF60;Q99569
14.3689861297607	14.7109718322754	14.9527931213379	14.7796382904053	15.1675672531128	14.6988706588745	14.8286781311035	15.1265211105347	14.9985914230347	14.7911357879639	TBL1XR1	A0A0D9SF63;Q9BZK7
14.0649528503418	14.2405252456665	14.5639200210571	13.7804155349731	15.1021690368652	14.2204351425171	14.6186685562134	14.7235918045044	14.5721426010132	14.4383993148804	FHL1	A0A0D9SFB0;A0A0D9SFI6;A0A0D9SFZ9;A0A0D9SGB2;A0A494C0D6;Q13642;Q5JXH7;Q5JXH8;Q5JXH9;Q5JXI0;Q5JXI2;Q5JXI3;Q5JXI8
12.5417394638062	11.8946342468262	13.1657304763794	12.0727682113647	13.3864889144897	12.9363412857056	13.3824920654297	13.5244083404541	12.8060331344604	13.0482540130615	CYTH2;CYTH3;CYTH1;CYTH2	A0A0D9SFG6;O43739;Q15438;Q99418
17.1562538146973	17.2199211120605	17.2440948486328	17.1400394439697	17.1786327362061	17.126485824585	17.3013553619385	17.166259765625	17.1966094970703	17.2580070495605	MYO18A	A0A0D9SFK2;Q92614
15.0317420959473	14.3694047927856	14.6864023208618	14.6238880157471	14.4698648452759	14.4894552230835	14.6935949325562	14.5520467758179	14.5418739318848	14.4873561859131	PNKP	A0A0D9SFL2;M0QYH2;Q96T60
13.5252809524536	14.5722398757935	14.7994318008423	14.0126342773438	15.4498348236084	14.3748912811279	14.637505531311	15.2917938232422	14.7951955795288	14.7972230911255	SHPRH	A0A0D9SFM0;Q149N8
16.1501312255859	16.230619430542	16.2811717987061	16.2423686981201	16.165922164917	16.1531257629395	16.0397205352783	15.7967014312744	16.1267929077148	16.026309967041	HADH	A0A0D9SFP2;A0A1W2PNM1;Q16836
14.429741859436	14.8418550491333	14.5719976425171	14.7392292022705	15.0476131439209	15.0713205337524	14.4098424911499	15.390625	14.8892364501953	15.0431613922119	UBE2A	A0A0D9SG71;A0A0R4J2E5;P49459
13.8667364120483	14.1218967437744	13.715539932251	13.9945707321167	13.8768768310547	13.9971008300781	14.1434459686279	14.0550394058228	13.9094076156616	14.1650896072388	STXBP1	A0A0D9SG72;A0A1B0GTP9;A0A1B0GVQ5;A0A1B0GWF2;A0A2R8Y5D4;P61764
14.2896242141724	14.3961420059204	14.137580871582	14.1364555358887	14.0643873214722	14.4992065429688	14.3580722808838	12.7047834396362	14.3707618713379	14.5813894271851	TATDN1	A0A0D9SGD3;E5RG17;E5RGF2;G5EA19;H0YBX2;Q6P1N9;U3KQS5
14.8881378173828	14.6735429763794	14.6147212982178	14.5186290740967	14.7620630264282	14.6084718704224	14.5770788192749	14.5816602706909	14.6955242156982	14.5113849639893	PHF6	A0A0D9SGE8;Q8IWS0
12.6212120056152	13.0918273925781	13.2726621627808	13.1340456008911	12.9180316925049	12.1210021972656	13.1899194717407	12.8475780487061	13.1793985366821	12.7329006195068	PTP4A1	A0A0D9SGK2;A0A3B3ISR8;Q93096
16.5913963317871	16.2374076843262	16.5500507354736	16.5683250427246	15.984691619873	16.249605178833	16.2814407348633	15.6233730316162	16.3289909362793	16.0677185058594	HLA-C	A0A0G2JH50;A0A0G2JIF0;A2BF26;Q5RIP0
15.6566047668457	16.1096267700195	15.8646411895752	15.933030128479	15.8829355239868	16.0046253204346	15.9609546661377	16.2348384857178	15.9508333206177	16.0738849639893	DIAPH1	A0A0G2JH68;O60610
15.8917388916016	15.7785768508911	15.6690483093262	15.8604116439819	15.6370944976807	15.8169250488281	15.8808546066284	15.8366947174072	15.6597995758057	15.7526922225952	PPP1R18	A0A0G2JHC2;Q6NYC8
22.3412551879883	22.4171981811523	22.3930644989014	22.4137992858887	22.3933963775635	22.3669815063477	22.4657821655273	22.4398002624512	22.5158462524414	22.4840106964111	HSPA1B;HSPA1A;HSPA1B	A0A0G2JIW1;P0DMV8;P0DMV9
14.4755153656006	14.5914316177368	14.8358955383301	14.4331350326538	14.5142154693604	14.3434133529663	14.7731819152832	14.577296257019	14.6099910736084	14.532114982605	ABHD16A	A0A0G2JJD3;O95870
14.4678020477295	13.750901222229	14.0365972518921	14.2698574066162	13.6239376068115	12.7860507965088	14.1872053146362	12.9364719390869	13.1469440460205	13.8922491073608	WDR46	A0A0G2JJL1;A0A140T9L0
11.7293300628662	12.7253932952881	12.5351886749268	12.7935314178467	12.4440135955811	12.6948165893555	12.2615051269531	11.5212678909302	12.6532411575317	11.8316631317139	RXRB	A0A0G2JKR7;P28702
15.3706970214844	15.048939704895	15.1908111572266	15.0243616104126	15.5240278244019	15.1549959182739	14.9406080245972	15.1795949935913	15.4907855987549	15.4069271087646	C4B_2;C4A;C4B;C4A;C4A;C4A;C4B;C4A;C4B	A0A0G2JL54;A0A0G2JPR0;A0A140TA29;A0A140TA32;A0A140TA44;A0A140TA49;F5GXS0;P0C0L4;P0C0L5
13.8513441085815	14.0783405303955	14.3577604293823	14.3225622177124	13.8914308547974	14.1611089706421	14.2723913192749	14.1479816436768	13.9513635635376	14.3943099975586	NLRP2	A0A0G2JLX3;A0A0G2JMG8;A0A0G2JNC8;A0A0G2JP37;A0A0G2JPB6;A0A0G2JPQ2;J3KN39;Q9NX02
16.7790565490723	16.2578659057617	16.5825271606445	16.3897953033447	16.0837383270264	15.9634761810303	16.3601608276367	16.0985832214355	16.1575584411621	16.0212020874023	OCLN	A0A0G2JMZ8;Q16625
16.29030418396	15.964825630188	16.1038093566895	16.047872543335	15.9535331726074	15.8693466186523	16.0002994537354	15.8625926971436	16.0064735412598	15.863353729248	SCRIB	A0A0G2JNZ2;A0A0G2JPP5;A0A669KB89;Q14160
17.5635318756104	16.3759002685547	16.5369510650635	16.460542678833	15.163290977478	16.200439453125	16.6771411895752	15.6378736495972	16.7767124176025	16.6528606414795	HLA-A	A0A0G2JPD3;A0A140T8W8;A0A140T8Y4;A0A1W2PPF8;A0A1W2PR61;Q5SPM2
14.7329168319702	14.5799417495728	14.7227840423584	14.1517734527588	14.037880897522	14.620587348938	14.7002410888672	13.9952583312988	14.181079864502	14.5729703903198	ABR	A0A0G2JQ41;A0A1C7CYZ0;Q12979
14.939826965332	14.6329975128174	15.0389347076416	14.6382837295532	14.7597074508667	14.38978099823	14.6150751113892	14.7059459686279	14.9425497055054	14.7365684509277	RBFOX2	A0A0G2JRA5;B0QYV1;O43251
17.9525260925293	17.9348449707031	17.982458114624	17.908317565918	18.1838035583496	17.9433174133301	17.9599170684814	18.1291370391846	17.9568119049072	17.8884582519531	PUF60	A0A0J9YVP6;A0A0J9YYL3
14.264045715332	14.3839683532715	9.89184761047363	14.3063936233521	14.7493858337402	13.5664300918579	10.8696241378784	11.9296474456787	11.3412809371948	11.844554901123	PLPP2	A0A0J9YXA3;K7EMK9;K7ENH4;O43688
17.2364158630371	15.9877891540527	16.5151233673096	17.0338077545166	16.8816394805908	16.778133392334	16.6995525360107	16.9278507232666	16.7047863006592	16.7147617340088	PON2	A0A0J9YXF2
10.4291477203369	11.0810317993164	11.5972356796265	10.8242292404175	11.0477418899536	10.9537506103516	11.7605257034302	11.5272817611694	10.8506622314453	11.0673980712891	MYO15B	A0A0J9YY01;A0A286YF23;A0A2R8YFM0;Q96JP2
16.3017272949219	15.2781839370728	15.739354133606	15.8042459487915	15.3302230834961	15.4413385391235	15.7541885375977	15.5515975952148	15.4530200958252	15.3255643844604	CENPV	A0A0M3HER2
19.1378002166748	18.9187049865723	18.9841690063477	18.9835453033447	18.8737239837646	18.8471088409424	18.8660316467285	18.6496620178223	18.8389797210693	18.7583560943604	MATR3	A0A0R4J2E8;A8MXP9;P43243
16.4370422363281	15.7951002120972	15.9277687072754	16.0477733612061	15.7159776687622	15.8861742019653	16.0190010070801	15.7708959579468	15.8070583343506	15.8008708953857	POLR1D	A0A0R4J2F3;P0DPB6
11.0467958450317	11.9378356933594	11.6360120773315	10.6193161010742	11.2377185821533	11.8029947280884	11.7911567687988	11.9935522079468	11.6027183532715	11.8271732330322	IFRD2	A0A0R4J2F6;H7C444;Q12894
14.1662292480469	14.1101007461548	14.5206880569458	14.3605461120605	14.5700378417969	13.7983922958374	14.2251825332642	13.9294338226318	14.6301651000977	14.3784589767456	PROS1	A0A0S2Z4L3;A0A3B3IRK9;A0A3B3ISJ1;A0A3B3IUA6;G5E9F8;P07225
14.4038581848145	14.2937746047974	15.1576948165894	14.0978450775146	14.2412633895874	14.6467962265015	14.6534366607666	14.152982711792	14.0561714172363	14.2182016372681	CLN6;CLN6;CLN6;CLN6;;CLN6;;CLN6;CLN6;CLN6;CLN6	A0A0S2Z5D0;A0A1B0GTU6;A0A1B0GTV3;A0A1B0GUD2;A0A1B0GW73;H3BNF1;H3BRN7;H3BTY4;H3BUT1;H3BUV4;Q9NWW5
14.9832153320313	14.8395261764526	14.6566228866577	14.786678314209	14.5279731750488	14.795877456665	14.8532733917236	14.8617792129517	14.4904937744141	14.8122720718384	GAN	A0A0S2Z5G5;A0A3B3ITY2;Q9H2C0
14.8112049102783	9.15104007720947	15.1857852935791	14.4522695541382	15.2109985351563	12.4754571914673	11.2455186843872	15.3606081008911	14.6466054916382	9.92658233642578	TP53	A0A0U1RQC9;P04637
13.4700078964233	13.1637163162231	12.6286792755127	12.9925670623779	13.0773878097534	13.44886302948	13.0156946182251	12.7329864501953	12.7303457260132	12.9373054504395	;PCLAF;PCLAF	A0A0U1RQM0;H0YMA4;Q15004
14.149266242981	13.904447555542	14.2316036224365	14.2749176025391	14.2903528213501	14.0626411437988	14.3647155761719	13.5351543426514	14.0420112609863	14.2485084533691	SCYL2	A0A0U1RQQ9;Q6P3W7
11.7611789703369	12.3576517105103	12.4916143417358	12.9420547485352	12.7694940567017	13.2044191360474	12.2604284286499	11.6483974456787	12.5412321090698	12.571964263916	ERVK3-1	A0A0U1RQS5;A0A0U1RQV1;B3KNS4;Q96A10
16.5177707672119	15.952618598938	15.4957761764526	15.8743391036987	15.3042936325073	15.6964683532715	15.8467836380005	15.7084932327271	15.8883008956909	15.9032936096191	CD99L2	A0A0U1RQT8;Q8TCZ2
15.8717832565308	15.7579288482666	15.9306221008301	15.7558193206787	16.4765491485596	15.981912612915	16.096773147583	16.4315299987793	16.024772644043	15.8524341583252	SYPL1	A0A0U1RQT9;C9JYN0;Q16563
11.8819437026978	12.3287553787231	12.8424005508423	12.4202280044556	12.3109016418457	12.7054862976074	13.1002225875854	12.6790008544922	12.3117275238037	12.3808069229126	CBL	A0A0U1RQX8;A0A1B0GW38;P22681
20.6650810241699	20.2339572906494	20.3113594055176	20.3467044830322	20.0348739624023	20.3353691101074	20.1012897491455	18.6133632659912	20.0800361633301	19.9641628265381	hCG_2039566;;H2AC11;H2AC7;H2AC18;H2AC12;H2AC14	A0A0U1RR32;A0A0U1RRH7;P0C0S8;P20671;Q6FI13;Q96KK5;Q99878
13.3515825271606	13.8484334945679	13.557671546936	13.288595199585	13.7376537322998	13.7718992233276	13.3618984222412	13.6349868774414	13.6302080154419	13.5064077377319	DCLK2	A0A0U1RR70;G5E9L9;Q8N568
15.6691818237305	15.1415777206421	14.8215360641479	14.8311424255371	14.8293294906616	14.9311971664429	14.9664278030396	15.1516695022583	14.946099281311	14.8881139755249	EXOC6B	A0A0U1RRB6;Q9Y2D4
13.3371953964233	13.0611114501953	13.4079713821411	13.3393211364746	12.8676700592041	12.6658487319946	13.1455736160278	12.2775592803955	12.8493480682373	12.479718208313	PHF14	A0A0U1RRH6;B4DG57;O94880
14.6431446075439	14.2486438751221	14.2781066894531	14.1644401550293	14.2008075714111	14.0822162628174	13.8937101364136	14.3352308273315	14.0780963897705	14.0777263641357	MICU1	A0A0U1RRK1;A0A286YF11;F6XEV2;Q9BPX6
13.7870721817017	13.5421476364136	13.4749898910522	13.9130764007568	13.2707843780518	13.2335042953491	13.9924974441528	13.6109027862549	13.5303401947021	13.6480932235718	ELF1	A0A0U1RRL5;P32519
15.2526178359985	14.7727994918823	15.0229005813599	15.0316791534424	14.8821516036987	14.8969039916992	15.0021457672119	14.785120010376	14.8503732681274	14.7402105331421	GATAD2B	A0A0U1RRM1;Q8WXI9
15.4860849380493	15.9562015533447	16.0014591217041	15.9399433135986	16.0060482025146	16.0421276092529	16.1269016265869	15.9002628326416	16.0832099914551	16.0435886383057	ENAH	A0A0U1RRM6;Q8N8S7
14.0876016616821	14.2263107299805	14.0565547943115	14.303409576416	13.9839935302734	14.0969381332397	13.7623281478882	13.6827220916748	14.1167974472046	13.8289985656738	HLA-A	A0A140T913;A0A140T933;A0A140T955;A0A140T9I0;A0A140T9X5;A0A1W2PRT9;Q53Z42
14.170862197876	14.4516983032227	15.3820333480835	14.8346128463745	13.0154008865356	14.2318229675293	15.2224159240723	14.0053882598877	14.7167387008667	14.5500659942627	HLA-B	A0A140T9D4
16.1153392791748	15.8453302383423	16.1671714782715	16.2327766418457	15.7545957565308	15.8506212234497	16.0315036773682	15.9459419250488	15.9558782577515	15.9811782836914	TAP1	A0A140T9T7;Q03518
12.8847846984863	13.1356115341187	13.0351982116699	12.8427143096924	13.0422744750977	13.0311145782471	12.9798917770386	12.8354511260986	12.9720964431763	12.8368978500366	PHF1	A0A140TA01;A2AB23;E9PQT8;E9PQZ5;O43189
8.4480094909668	7.46405935287476	6.10835886001587	10.706636428833	11.6621122360229	8.69623851776123	8.05844020843506	10.7981615066528	11.8105764389038	10.9674758911133	RNF5	A0A140TA09;Q99942
15.3173027038574	14.842059135437	14.8762369155884	14.7842435836792	14.8184175491333	14.597092628479	14.839373588562	14.6787405014038	14.9160318374634	14.8261909484863	MICOS13	A0A140TA86;Q5XKP0
11.7759113311768	13.439582824707	13.4874897003174	13.8171319961548	12.7687177658081	13.5921602249146	13.0791091918945	13.2826728820801	13.9749822616577	13.3540191650391	SELENOS	A0A182DWI4;E9PN30;Q9BQE4
13.7035255432129	13.7129726409912	14.1635541915894	13.6740455627441	14.2696218490601	13.6634941101074	14.0143852233887	13.7478857040405	13.9931697845459	13.7255392074585	ATP6AP2	A0A1B0GTB0;A0A1B0GVB9;A0A1B0GVW0;A0A1B0GWJ8;A0A1C7CYW4;H7C3E1;O75787
13.1153450012207	13.3322896957397	13.3711462020874	13.5561742782593	13.6314268112183	13.5962038040161	13.7282247543335	13.1429319381714	13.6456899642944	13.4333915710449	FTO	A0A1B0GTC3;A0A1B0GTC5;A0A1B0GTY1;A0A1B0GU26;A0A1B0GUC3;A0A1B0GV98;A0A1B0GVH5;Q9C0B1
18.7671489715576	18.7627143859863	18.7751846313477	18.7411403656006	18.697961807251	18.6354751586914	18.7304744720459	18.7830467224121	18.7502155303955	18.7231960296631	ALDH7A1	A0A1B0GTG2;A0A1B0GW77;P49419
15.0908784866333	14.3792562484741	14.3800487518311	14.5684204101563	14.1007041931152	14.2612714767456	14.5798397064209	14.3131666183472	14.3354520797729	14.1777877807617	RAB11FIP5	A0A1B0GTL5;Q9BXF6
15.4138116836548	15.8288021087646	15.8801412582397	15.6232881546021	15.8470296859741	15.5605201721191	15.695333480835	15.8027591705322	15.8757238388062	15.5508975982666	ASAH1	A0A1B0GTM3;A0A1B0GTP7;A0A1B0GTZ5;A0A1B0GUA4;A0A1B0GUG1;A0A1B0GUH5;A0A1B0GW68;E7EMM4;Q13510
13.1330671310425	12.6460285186768	13.0582990646362	13.1285133361816	12.686131477356	13.0198459625244	15.593053817749	13.0332307815552	12.5525512695313	12.9608097076416	CACNA1D	A0A1B0GTN0;A0A1B0GUN6;Q01668;Q59GD8
13.8048000335693	11.8359928131104	12.2708711624146	12.3798065185547	12.0371990203857	10.9724998474121	11.5086078643799	11.3981838226318	11.9194431304932	12.054838180542	PCCA	A0A1B0GTR1;A0A1B0GU58;A0A1B0GUX9;A0A1B0GWA1;A0A1B0GWI4;P05165
14.5664682388306	14.4899196624756	14.2011814117432	14.4635324478149	14.4741172790527	14.3735580444336	14.5107908248901	14.5695600509644	14.485634803772	14.592945098877	PXN	A0A1B0GTU4;F5GZ78;P49023
15.1096467971802	13.9135656356812	15.100136756897	15.1727294921875	15.2376413345337	15.1757516860962	13.1675310134888	15.0964937210083	15.0849714279175	12.0783529281616	EPB41L1	A0A1B0GTW6
15.6758136749268	15.4949159622192	15.3104915618896	15.5470542907715	15.0364580154419	15.2552947998047	15.3675355911255	15.490816116333	15.1538925170898	15.4939441680908	ACY1	A0A1B0GU86;Q03154
14.336386680603	14.95250415802	14.9202499389648	14.9134187698364	15.3288927078247	15.2097520828247	15.0445928573608	14.9019956588745	15.1081113815308	15.0437574386597	KIFBP	A0A1B0GUA3;Q96EK5
13.4632873535156	13.5621299743652	13.6411476135254	13.6556882858276	13.9062366485596	13.7237119674683	13.8032598495483	13.8589954376221	13.8418092727661	13.9107666015625	KIF13A	A0A1B0GUA8;Q9H1H9
17.1458377838135	16.7489738464355	16.3517780303955	16.6403751373291	16.5065422058105	16.7443199157715	16.2424850463867	16.9042453765869	16.3547401428223	16.6624317169189	RBMS3;RBMS3;RBMS3;RBMS1;RBMS1;RBMS1;RBMS1;RBMS3	A0A1B0GUW5;C9J9B2;C9JIJ9;E7EPF2;E7ETU5;F6Y5H0;P29558;Q6XE24
14.4688987731934	14.3749380111694	14.5971822738647	14.4244327545166	14.6034450531006	14.4508266448975	14.6004009246826	14.4385747909546	14.569188117981	14.2896461486816	EFR3A	A0A1B0GUZ7;Q14156
14.2984857559204	13.7981615066528	14.0952339172363	14.0637245178223	13.8585433959961	13.9764680862427	13.9643659591675	13.6605634689331	13.8971767425537	13.7631158828735	EHMT1	A0A1B0GV09;Q9H9B1
20.4321117401123	20.5253524780273	20.3136081695557	20.110652923584	20.6225605010986	20.2375259399414	20.1670913696289	20.6223182678223	20.5167827606201	20.4510536193848	CTSD;CTSD;CTSD;;CTSD	A0A1B0GV23;A0A1B0GWE8;C9JH19;CATD_HUMAN;P07339
10.2998657226563	12.6945199966431	12.8152551651001	12.6686515808105	12.6909618377686	12.4149971008301	12.8452157974243	12.696081161499	12.869779586792	12.4904479980469	KIF21A	A0A1B0GV47;Q7Z4S6
13.4766225814819	13.2727117538452	13.4455986022949	13.6498765945435	13.3672857284546	13.3623504638672	13.5154981613159	13.6307315826416	13.4209671020508	13.2976303100586	TAB2	A0A1B0GV57;Q9NYJ8
18.4868354797363	18.9215545654297	17.85205078125	17.8715019226074	17.6551113128662	19.3800086975098	18.6629695892334	19.8225193023682	19.3108749389648	18.5810737609863	KRT10;;KRT10	A0A1B0GVI3;K1C10_HUMAN;P13645
12.2604999542236	12.6519336700439	13.0801248550415	12.6864280700684	13.4410600662231	12.8465719223022	12.8596563339233	13.0017986297607	13.0595970153809	12.8963584899902	DPY19L1	A0A1B0GW05
11.8849763870239	12.6828327178955	13.2431154251099	12.6716537475586	12.7476177215576	12.7289733886719	13.4149112701416	12.8648624420166	13.0062780380249	13.032244682312	MVK	A0A1B0GWC2;A0A1B0GWF3;F5H8H2;Q03426
9.96265125274658	10.5108442306519	11.0961151123047	10.498517036438	10.6410598754883	10.5892763137817	11.278172492981	11.2603607177734	11.2483577728271	11.0491123199463	RAB34	A0A1C7CYW6;P0DI83
14.4535932540894	13.7555274963379	14.0183515548706	13.7986707687378	13.6372146606445	13.537501335144	13.6840543746948	13.8257656097412	13.7982873916626	13.8144207000732	MIDEAS	A0A1C7CYX1
12.3953952789307	12.1959524154663	12.101056098938	12.0491666793823	12.080249786377	11.9132766723633	12.8649873733521	12.0461568832397	12.1867847442627	12.1651039123535	FAM107B	A0A1C7CYX8;C9J6N5;C9JQ40;C9JW51;Q9H098
15.2675523757935	14.6989669799805	14.2870244979858	14.7244749069214	14.7421932220459	13.9010324478149	14.8656549453735	14.6288232803345	14.7568798065186	14.5854759216309	DPYSL2	A0A1C7CYX9
16.9240779876709	16.5967445373535	16.7208919525146	16.6802558898926	16.5665683746338	16.4733562469482	16.5158653259277	16.7199859619141	16.5822277069092	16.5132369995117	SFXN3	A0A1P0AYU5;Q9BWM7
11.9039812088013	12.5728807449341	12.1960506439209	11.9607601165771	13.0146942138672	10.6489686965942	12.5932731628418	12.3561086654663	11.5004529953003	11.5830640792847	SLC35A3;SLC35A3;;;SLC35A3;;SLC35A3;;SLC35A3;SLC35A3;SLC35A3;SLC35A3;SLC35A3;;;;SLC35A3;SLC35A3	A0A1W2PNF0;A0A1W2PNY6;A0A1W2PPE6;A0A1W2PPG9;A0A1W2PPH4;A0A1W2PQ13;A0A1W2PQ60;A0A1W2PQD6;A0A1W2PQH2;A0A1W2PQL8;A0A1W2PR66;A0A1W2PRN3;A0A1W2PRT7;A0A1W2PS45;A0A1W2PS77;A0A1W2PSA9;A0A1W2PSD1;Q9Y2D2
11.990496635437	12.1396198272705	12.3821620941162	11.889817237854	12.7569608688354	12.0738840103149	12.4704732894897	12.392804145813	12.7508707046509	11.6813650131226	PIGT	A0A1W2PNP0;Q969N2
15.095760345459	15.8735685348511	15.6923027038574	15.6948566436768	16.1497268676758	15.8258104324341	15.7474679946899	15.9048633575439	15.907431602478	16.0571269989014		A0A1W2PNV4
15.6895036697388	16.1878700256348	16.0487461090088	16.0187549591064	16.1616458892822	16.1545181274414	16.0669841766357	16.4147853851318	16.0921688079834	16.3231735229492	UNC45A	A0A1W2PNX8;Q9H3U1
11.7716455459595	12.7858734130859	13.1007308959961	12.7331399917603	12.5579919815063	11.9317512512207	13.2253112792969	12.5885982513428	12.5052785873413	11.2982444763184	RBMX2	A0A1W2PP04;Q9Y388
14.5055856704712	14.25816822052	14.168023109436	14.6645812988281	13.7726926803589	14.4403200149536	14.1776666641235	14.1464977264404	14.1861848831177	13.9806699752808	GOSR2;GOSR2;GOSR2;GOSR2;GOSR2;GOSR2;GOSR2;GOSR2;;GOSR2;GOSR2;GOSR2	A0A1W2PPG1;A0A1W2PPG5;A0A1W2PPP5;A0A1W2PQM3;A0A1W2PRC2;A0A1W2PRV0;A0A1W2PS81;A0A1X7SBU8;E7EQ34;I3L4Z6;I3NI02;O14653
14.1477108001709	13.7471599578857	14.1841039657593	13.9949083328247	14.2094106674194	13.6503162384033	13.9201526641846	14.0682191848755	13.8864364624023	13.8973569869995	VPS72	A0A1W2PPT2;Q15906
15.2810716629028	15.305365562439	15.5129203796387	15.329402923584	15.6624708175659	15.2819318771362	15.438289642334	15.5773372650146	15.5543127059937	15.3590898513794	SCARB2	A0A1W2PPX5;A0A1W2PQB7;A0A1W2PQR6;A0A1W2PRS1;A0A1W2PS43;Q14108
17.9496822357178	17.5802783966064	17.5281772613525	17.5641822814941	17.3264236450195	17.5709095001221	17.6705379486084	17.533727645874	17.4855632781982	17.5493183135986	TCEA1	A0A1W2PPZ5;P23193
15.1612796783447	14.9645538330078	15.0153398513794	15.0536231994629	14.7352457046509	14.7818975448608	15.0092763900757	14.6836061477661	14.933445930481	14.8223915100098	;RAD50	A0A1W2PQ90;Q92878
18.4619922637939	18.4000434875488	18.5484771728516	18.5175666809082	18.420093536377	18.3487491607666	18.3386039733887	18.302526473999	18.413932800293	18.2337188720703	ME2	A0A1W2PQT3;A0A1W2PQY8;A0A1W2PR68;P23368
17.6968212127686	16.2199039459229	16.1343536376953	16.6061153411865	15.432110786438	16.1916351318359	15.9783706665039	15.8349380493164	15.5862855911255	16.1703605651855	GCSH	A0A1W2PQV2;H3BUH9;P23434
11.9972944259644	13.518406867981	13.728967666626	14.1211795806885	14.3910608291626	13.1916809082031	14.0885591506958	13.1477870941162	13.1800651550293	13.8257913589478	PFKFB3	A0A1W2PR17;Q16875;Q5VX20;Q5W015
13.5740184783936	9.95670509338379	13.4360809326172	13.2903432846069	13.5663414001465	13.2887296676636	13.4248552322388	12.0141649246216	13.4576082229614	12.8206977844238	IQSEC2	A0A1W2PR28;A0A1W2PRJ5;A0A6Q8PFR7;Q5JU85
13.9199829101563	14.2538642883301	14.0358018875122	14.1556034088135	13.9157800674438	14.1587390899658	14.448748588562	14.3104181289673	14.188006401062	14.2607889175415	SYNJ2	A0A1W2PR85;O15056
15.0959415435791	14.5885572433472	14.7509479522705	14.7971277236938	14.4021501541138	14.3044500350952	14.9849767684937	14.5690994262695	14.502854347229	14.4523859024048		A0A1W2PRB8
16.8779563903809	16.5380344390869	16.6332397460938	16.4992942810059	16.1470928192139	16.396146774292	16.5922050476074	16.5526676177979	16.3388290405273	16.4235916137695	SMN2;SMN1;SMN1	A0A1W2PRV5;E7EQZ4;Q16637
14.0999956130981	14.1624021530151	14.1729221343994	14.0981140136719	14.2348041534424	14.1510772705078	14.2845048904419	14.2734975814819	14.274299621582	14.2904586791992	PIK3C3	A0A1W2PS05;A8MYT4;Q8NEB9
19.3241100311279	19.060131072998	19.2809963226318	19.3190574645996	19.0412559509277	18.8845558166504	19.1098670959473	18.6687908172607	19.1085147857666	18.9601078033447	HLA-A	A0A1W2PS24;P04439;Q5SRN5;Q5SRN7
18.7467498779297	18.2747097015381	18.3092384338379	18.3269557952881	18.2693634033203	18.1956481933594	18.1853733062744	17.9775428771973	18.2580127716064	18.1494922637939	DDX17	A0A1X7SBZ2;Q92841
13.9412612915039	13.9654331207275	14.640908241272	14.2975444793701	14.2083396911621	14.0508079528809	14.3865079879761	13.8333034515381	14.3027143478394	13.992639541626	NFIC	A0A286YEX4;P08651
12.4482660293579	12.8289051055908	12.891731262207	12.8127298355103	12.7122011184692	12.7394914627075	13.0290822982788	12.4014625549316	12.6634092330933	12.6911602020264	ANAPC10;;ANAPC10;ANAPC10;ANAPC10;ANAPC10	A0A286YEY6;A0A3B3ISY7;D6R9Q5;D6RA92;D6RD74;Q9UM13
14.39528465271	14.0665988922119	13.6165962219238	14.2030687332153	12.9939002990723	13.2653398513794	13.5408935546875	13.3396015167236	12.6599550247192	13.4630279541016	PHGDH	A0A286YF22;A0A286YFA2;A0A2C9F2M7;O43175
16.5767784118652	16.3872871398926	16.0702247619629	16.2055835723877	16.1587448120117	16.1268577575684	15.8698463439941	15.9222888946533	16.020414352417	16.0817203521729	PPT1	A0A286YFF7;A0A2C9F2P4;P50897
13.5652132034302	14.3573551177979	14.2943897247314	14.1128692626953	14.4023065567017	14.1337909698486	14.4680328369141	14.2865581512451	14.2328319549561	14.3369693756104	MON2	A0A286YFF8;Q7Z3U7
13.3725070953369	13.3868198394775	13.154468536377	12.9820966720581	13.3387117385864	13.6350383758545	13.3653707504272	13.5331125259399	13.4775447845459	13.4129686355591	CAMK2G	A0A2Q3DQE3;H0Y6G2;Q13555;Q5SWX3
12.7061805725098	12.7606239318848	12.9878311157227	13.0619430541992	12.8232383728027	12.5564918518066	12.8501892089844	10.7932844161987	13.0257368087769	12.2669839859009	SPG7	A0A2R8Y3M4;A0A2R8Y4L0;A0A2R8Y4L7;A0A2R8Y4M0;A0A2R8Y4Y7;A0A2R8Y632;A0A2R8Y6E8;A0A2R8Y6K2;A0A2R8Y6Z7;A0A2R8Y726;A0A2R8Y729;A0A2R8Y7B8;A0A2R8Y7E2;A0A2R8Y7N2;A0A2R8YDQ1;A0A2R8YFF4;A0A2R8YFJ7;A0A2R8YFN9;A0A2R8YFW4;A0A2R8YG79;A0A2R8YGV4;A0A2U3TZH1;Q9UQ90
14.2651147842407	14.1908760070801	14.1785650253296	14.1245393753052	14.2073230743408	14.0079698562622	14.1202306747437	14.2133464813232	14.1995258331299	14.0576705932617	HARS2	A0A2R8Y3N3;A0A2R8Y5P7;P49590
13.3709573745728	13.7474641799927	13.2985363006592	13.4943857192993	13.3760108947754	13.1986455917358	13.1499786376953	13.9046411514282	13.2827749252319	13.4943408966064	CEP78	A0A2R8Y432;A0A2R8Y4C1;A0A2R8Y589;A0A2R8Y5W6;A0A2R8Y7A4;A0A2R8Y7U5;A0A2R8YCP0;A0A2U3TZI9;A8MST6;Q5JTW2
12.2854995727539	13.0776128768921	12.8152885437012	12.3921022415161	12.4256753921509	12.8542938232422	12.9716787338257	13.1052598953247	13.0735635757446	12.2949161529541	ABCB7	A0A2R8Y473;A0A590UJS8;A0A5F9ZA98;B4DGL8;O75027
15.7686948776245	15.8169088363647	16.0208492279053	15.6904468536377	16.3936920166016	15.7536973953247	15.9017686843872	16.3149261474609	16.1074161529541	15.9001731872559	CD47	A0A2R8Y484;Q08722
12.5796813964844	12.7576627731323	13.2120046615601	13.1189441680908	12.7254447937012	12.5689172744751	12.9717168807983	12.766414642334	12.8630695343018	12.6654405593872	SLC29A3	A0A2R8Y4B7;A0A2R8Y4I0;A0A2R8Y5R8;A0A2R8Y657;A0A2R8YGC2;Q9BZD2
13.5886821746826	14.0028924942017	13.841495513916	14.1407070159912	13.517014503479	13.8832006454468	13.8972682952881	13.9094429016113	13.36412525177	13.7059783935547	BCAR1	A0A2R8Y4C2;A0A2R8Y596;A0A2R8Y5C9;A0A2R8Y5E4;A0A2R8Y6M6;A0A2R8Y8C4;A0A2R8YFK2;A0A2R8YFS8;P56945
15.2542057037354	14.9806718826294	15.209153175354	15.121244430542	15.2671594619751	15.2963771820068	15.1307973861694	15.0529565811157	15.1062383651733	14.9454383850098	SMARCA4	A0A2R8Y4P4;A0A2R8Y7S2;P51532;Q9HBD4
16.9698696136475	17.0963268280029	16.8542327880859	16.9392242431641	17.116626739502	16.9907302856445	16.6887035369873	17.1361904144287	17.0199241638184	16.9456005096436	ATP2B2	A0A2R8Y4R4;Q01814
12.4058418273926	12.8349227905273	13.2348651885986	13.3984756469727	13.0024652481079	12.9415063858032	13.123646736145	12.9581279754639	12.9402570724487	12.925537109375	IFNGR1	A0A2R8Y4U4;A0A2R8Y7R1;A0A2R8YFL3;P15260
13.6551570892334	13.507345199585	14.011155128479	13.87646484375	13.7489757537842	13.9439001083374	13.9247808456421	13.7238674163818	13.4228925704956	13.8850297927856	EPS8	A0A2R8Y4W2;A0A2R8YE63;Q12929
15.9110879898071	15.7049427032471	15.7053890228271	15.6156253814697	15.6130199432373	15.4801807403564	15.5179233551025	15.6826972961426	15.6777839660645	15.5706062316895	CTNNB1	A0A2R8Y543;A0A2R8Y5A3;A0A2R8Y804;A0A2R8YCH5;P35222
12.9245328903198	12.8587408065796	12.7190160751343	12.8932676315308	12.0551986694336	13.1091775894165	13.2008743286133	13.1357460021973	13.3548402786255	13.0994577407837	ACBD6	A0A2R8Y544;Q9BR61
15.5371513366699	14.2591114044189	15.2835512161255	15.3447875976563	15.031662940979	15.0567169189453	15.0199575424194	14.8334188461304	14.9997634887695	14.9489135742188	PATJ	A0A2R8Y549;Q8NI35
14.4683904647827	14.6400213241577	14.5427846908569	14.3803844451904	14.456561088562	14.1034688949585	14.5020990371704	14.6372203826904	14.3918476104736	14.4306812286377	RELCH	A0A2R8Y566
9.76411819458008	10.4267539978027	10.3689222335815	10.5162973403931	8.61851596832275	12.5889148712158	12.8709554672241	13.4648942947388	9.59537029266357	12.0418291091919	CTCF	A0A2R8Y595;A0A2R8YFL0;P49711
15.1911821365356	14.7014217376709	15.0451679229736	14.9800024032593	14.8407621383667	14.6404724121094	14.8403921127319	14.8729581832886	14.9262666702271	14.7303533554077	;FXN;FXN	A0A2R8Y5A1;C9JAX1;Q16595
15.7629480361938	15.6268930435181	15.6028451919556	15.5776700973511	15.6607580184937	15.659761428833	15.6637964248657	15.7119626998901	15.5884017944336	15.5818433761597	ATXN2	A0A2R8Y5A6;A0A2R8YDM9
13.6840915679932	13.6837368011475	13.5191507339478	13.5693292617798	13.3055229187012	13.4026184082031	13.5252285003662	13.5482540130615	13.3972024917603	13.3563861846924	TSC2	A0A2R8Y5F1;A0A2R8Y6C9;A0A2R8Y7C8;A0A2R8Y7X5;A0A2R8YDR3;A0A2R8YDZ2;A0A2R8YGD6;A0A2R8YGU4;H3BMQ0;P49815;X5D2U8
14.7830953598022	15.1999254226685	14.9823923110962	15.0025968551636	14.987771987915	14.973614692688	15.1875352859497	15.2694568634033	15.0426025390625	15.1346607208252	TBCE	A0A2R8Y5Q8;A0A2R8YHI9;Q15813
13.413028717041	14.236647605896	14.0772380828857	14.0610218048096	14.0865144729614	14.0889186859131	14.2614774703979	14.1106414794922	14.2009916305542	14.3512630462646	CERT1	A0A2R8Y5S9;A0A2R8Y7Q9;A0A2R8YE59;A0A2R8YEK8;A0A2U3TZL3;Q9Y5P4
12.8787679672241	13.5293235778809	13.4210338592529	13.5789947509766	13.3499250411987	13.8707427978516	13.3506717681885	13.3045234680176	13.4415912628174	13.2406930923462	ERCC3	A0A2R8Y6W8;P19447
16.7173957824707	16.5822696685791	16.8892498016357	16.7300033569336	16.6535034179688	16.4722747802734	16.6690692901611	16.7532062530518	16.7416114807129	16.5510559082031	SUCLA2	A0A2R8Y6Y7;A0A2R8YDQ9;Q9P2R7
18.7426319122314	19.0743179321289	19.0264701843262	18.9571342468262	19.1727466583252	19.0386066436768	19.0439949035645	19.1731605529785	19.1317768096924	19.1161403656006	DYNC1H1	A0A2R8Y706;Q14204
12.8416872024536	13.1354141235352	13.1858615875244	13.2313833236694	13.0599784851074	12.9925079345703	13.3325443267822	13.0461387634277	13.0487985610962	13.1380376815796	CCDC88A	A0A2R8Y7B1;Q3V6T2
10.0946626663208	10.7683944702148	11.1809606552124	10.9995555877686	10.1459150314331	9.51810646057129	10.9369716644287	10.5187206268311	11.2098512649536	10.2113990783691	BPTF	A0A2R8Y7Q1;E7ETD6;E9PE19;F5GXF5;Q12830
13.9181976318359	14.5353507995605	14.4904708862305	14.5651044845581	14.3224725723267	14.4916706085205	14.5883569717407	14.4274368286133	14.3429708480835	14.4693689346313	PPFIA1	A0A2R8Y7R9;Q13136
19.6106376647949	19.328592300415	19.2227210998535	19.3547744750977	19.2834453582764	19.4081954956055	19.2319984436035	19.3442554473877	19.2257804870605	19.3286457061768	RPS14	A0A2R8Y811;P62263
18.5230140686035	18.2821464538574	18.1339435577393	18.3662719726563	18.2812938690186	18.4266300201416	18.1135368347168	18.13698387146	17.9512386322021	18.2270278930664	RPS24	A0A2R8Y849;A0A2R8YD14;E7ETK0;P62847
15.0119533538818	14.7750720977783	14.7425327301025	14.9778814315796	14.5880355834961	14.7731227874756	14.6901521682739	14.6316032409668	14.9360876083374	14.8719215393066	SMARCE1	A0A2R8Y855;Q969G3
13.6670742034912	14.6420602798462	14.5011348724365	14.2451133728027	14.4791250228882	14.0649356842041	14.7192211151123	14.5594034194946	14.8702430725098	14.5276346206665	PFKM	A0A2R8Y891;P08237
16.8430862426758	17.0077724456787	16.9059638977051	16.9623336791992	16.9714050292969	16.9934940338135	16.9712352752686	16.685037612915	16.8866882324219	16.9143104553223	CSNK2A1	A0A2R8YD58;E7EU96;P68400
14.1628017425537	13.5565614700317	13.8853673934937	13.7044239044189	13.1512327194214	13.5194835662842	13.8086214065552	13.3498697280884	13.4135713577271	13.2624464035034	SAP130	A0A2R8YDB8;H7BXF5;Q9H0E3
11.8695650100708	12.8845872879028	13.7263097763062	13.544659614563	13.4503307342529	13.3084411621094	13.4157447814941	13.4274120330811	13.2183265686035	13.0932598114014	DMAC2L	A0A2R8YDJ1;A0A5K1VW60;Q99766
13.5816717147827	13.5525884628296	13.653826713562	13.6002340316772	13.1245164871216	13.4464244842529	13.711127281189	13.2533359527588	13.4618129730225	13.5974397659302	;VPS33B	A0A2R8YDQ0;Q9H267
13.2479019165039	13.1361274719238	13.7113084793091	13.7474641799927	13.3367280960083	13.4839773178101	13.5696830749512	13.4748458862305	13.570538520813	13.5324411392212	OPA1	A0A2R8YE54
15.047251701355	15.2113456726074	15.4116907119751	15.3487510681152	15.4086828231812	15.0623998641968	15.1192770004272	15.3947944641113	15.3415498733521	15.184497833252	CASK	A0A2R8YE77;A0A2U3TZM1;O14936
14.8824691772461	13.6761045455933	14.8165426254272	14.1240072250366	14.0354099273682	13.8051786422729	14.569727897644	12.1718120574951	13.8317470550537	13.7678375244141	NLRP3	A0A2R8YEG7;A0A7I2PJH0;A0A7I2PMC6;A0A7I2PRX0;A0A7I2R3P8;A0A7I2UNQ2;A0A7I2YME5;Q96P20
12.9440832138062	13.630672454834	13.3520879745483	13.4825439453125	13.3387756347656	13.611964225769	13.6201467514038	13.1455135345459	13.374119758606	13.54185962677	CCNH	A0A2R8YEM2;D6RG18;D6RHI7;P51946
11.5893564224243	13.1683559417725	13.3135929107666	12.8327713012695	13.1246824264526	12.8987302780151	11.2624950408936	12.9091682434082	12.7718639373779	13.013632774353	SLC33A1	A0A2R8YF57;H7C562;H7C577;O00400
11.8877210617065	13.5119428634644	13.58522605896	13.3793544769287	14.1483335494995	13.6955194473267	13.3930416107178	10.6034536361694	13.7516279220581	13.4782724380493	VPS33A;VPS33A;;VPS33A	A0A2R8YF87;F5H6Y0;H3BMM5;Q96AX1
12.8455076217651	13.3525381088257	13.7335710525513	13.869686126709	13.728609085083	13.760329246521	13.5372409820557	13.8530969619751	13.485315322876	13.5935220718384	MICAL2	A0A2R8YFA9;O94851
14.5595197677612	15.5214757919312	15.7941055297852	15.695499420166	15.8532218933105	15.6910963058472	15.814582824707	15.7667264938354	15.6717481613159	15.7486085891724	SEC23B	A0A2R8YFH5;Q15437
13.5359296798706	13.3352098464966	13.4823293685913	13.5548009872437	13.1910524368286	13.0266942977905	13.1806230545044	12.9883394241333	13.3868350982666	13.106912612915	WIZ	A0A2R8YFV2;A0A669KAV7;A0A669KBG4;A0A669KBH9;B9EGQ5;M0QXA7;O95785
14.3894147872925	15.4670600891113	15.5800132751465	15.4451599121094	15.2166290283203	15.4270334243774	15.5656032562256	14.857403755188	15.3983430862427	15.6212701797485	ARHGEF7	A0A2R8YG42;B1ALK7
17.1460571289063	16.7945022583008	16.8165035247803	16.8147163391113	16.794059753418	16.3242492675781	16.572395324707	16.1203422546387	16.5468406677246	16.4851169586182	TPP1	A0A2R8YGD1;O14773
12.7716064453125	13.2862720489502	13.3182764053345	13.0964298248291	13.6972064971924	13.278694152832	13.4736986160278	13.0508279800415	13.4034214019775	13.1908121109009	AP1S1	A0A2R8YGH5;H7C1E4;P61966
13.3118886947632	14.5840578079224	14.943115234375	13.3558673858643	11.5348100662231	12.4350919723511	10.8203544616699	11.4235248565674	14.1818809509277	14.0656652450562	TPM4	A0A2R8YHD2
14.5778837203979	14.4235925674438	14.7270612716675	14.7758617401123	14.3604211807251	14.5624389648438	14.9423294067383	15.7086744308472	14.9892177581787	15.3019456863403	EEF1A2	A0A2U3TZH3;Q05639
15.086275100708	13.396050453186	15.2331876754761	15.3672494888306	15.7001209259033	15.3061408996582	11.4743766784668	15.7571115493774	13.6928911209106	15.1213712692261	CD59;;CD59	A0A2U3TZL5;E9PNW4;P13987
13.3712730407715	13.2799835205078	13.6036376953125	13.3518915176392	13.8820867538452	13.5306434631348	13.9819145202637	13.7522296905518	13.8858861923218	13.2944898605347	KIF23	A0A2U3TZL8;A0A7I2V5Y5;H7BYN4;Q02241
13.5423555374146	14.0370283126831	14.2938470840454	14.26158618927	14.2785711288452	13.899188041687	14.0609350204468	13.7218170166016	14.2390995025635	13.5620460510254	CLPB	A0A2U3TZY2;Q9H078
14.4904508590698	13.1742544174194	9.81460952758789	14.5272350311279	13.9150733947754	13.7096500396729	11.9956703186035	14.0596036911011	13.203013420105	13.1220693588257	ARSB	A0A2U3U034;P15848
12.6585912704468	12.4649181365967	12.0374937057495	12.3493919372559	12.2588701248169	12.3880157470703	12.2000131607056	10.9595890045166	12.2129926681519	11.9898271560669	KCTD1;KCTD21;KCTD21;KCTD21;KCTD21;KCTD1;KCTD1;KCTD21;KCTD1	A0A2U3U043;E9PJJ5;E9PK99;E9PMS5;E9PRT1;J3KSG1;J3QRK1;Q4G0X4;Q719H9
15.7168073654175	15.5403842926025	15.5455341339111	15.5728387832642	15.5812549591064	15.3493852615356	15.517110824585	15.1282005310059	15.4681777954102	15.3246402740479	NDUFA6	A0A2Y9D025;P56556
14.681227684021	14.2069702148438	14.1344585418701	14.5558309555054	14.1804962158203	14.341028213501	14.2690944671631	14.099967956543	14.1409187316895	14.4506940841675	NCOR2	A0A384DVL6;C9J0Q5;C9J7T7;C9JE98;Q9Y618
13.5996761322021	13.8877172470093	14.054615020752	13.8852910995483	14.1204128265381	13.6287708282471	13.7168045043945	13.4160060882568	13.8207578659058	13.5773983001709	PNPLA6	A0A384DVU0;Q8IY17
14.1733589172363	14.1443510055542	14.160252571106	14.2873058319092	13.9435062408447	14.2461271286011	14.1549377441406	14.1977310180664	14.3095483779907	14.1658124923706	DENND10;DENND10P1;DENND10	A0A3B3IRE4;Q6NSW5;Q8TCE6
14.3696022033691	15.0858640670776	14.9502172470093	14.9905862808228	15.1474943161011	15.1279191970825	15.1397438049316	15.1447610855103	14.9956216812134	15.2208461761475	CTPS1	A0A3B3IRI2;P17812
16.9153137207031	16.0875339508057	16.3545989990234	16.3551750183105	16.2840557098389	16.0535373687744	16.2912788391113	15.1799354553223	16.3947429656982	16.0566902160645	CREG1	A0A3B3IRL2;O75629
12.7827882766724	13.1597213745117	13.3767900466919	13.2500486373901	13.0933742523193	13.3218641281128	13.258957862854	9.45213985443115	13.2755813598633	13.1180152893066	ADAR	A0A3B3IRQ9
11.1928606033325	12.5478191375732	11.9675455093384	12.3556861877441	11.5949850082397	12.3016481399536	11.4883556365967	11.6763534545898	11.1886768341064	12.2380027770996	HMBS	A0A3B3IRR1;A0A3F2YNY7;F5H345;P08397
16.4349555969238	16.4192714691162	16.6164646148682	16.3322410583496	16.6657810211182	16.1724529266357	16.4882030487061	16.4659023284912	16.481517791748	16.4347019195557	SSR1	A0A3B3IRT8;C9IZQ1;C9J3L8;C9J5W0;E9PAL7;P43307
14.0686979293823	14.385724067688	14.215106010437	14.2585859298706	14.475266456604	14.194016456604	14.3890895843506	13.9925203323364	14.1873760223389	14.0930061340332	RB1	A0A3B3IS71;P06400
8.71364879608154	10.9168891906738	11.6226282119751	11.0660371780396	12.2130708694458	11.2358150482178	11.3193454742432	6.7580132484436	11.7077388763428	10.4836301803589	ALG11	A0A3B3IS90;A0A7P0T8Y4;Q2TAA5
13.2106342315674	13.3462429046631	13.7865495681763	13.5339136123657	14.352068901062	13.0996026992798	13.7045545578003	13.3228387832642	13.2963132858276	12.9945859909058	CDC16	A0A3B3ISD2;Q13042
12.6879835128784	13.0681915283203	12.9782381057739	13.1317100524902	12.8208665847778	12.7874059677124	12.8887243270874	11.5950059890747	12.8902807235718	12.7455825805664	LARP1B	A0A3B3ISF0;Q659C4
14.043140411377	13.9735107421875	13.9777002334595	14.3602447509766	14.0033025741577	14.1446647644043	13.792820930481	13.8612947463989	13.8857870101929	13.7064504623413	ECE1	A0A3B3ISF9
13.8584480285645	14.7356109619141	14.8443336486816	14.6917009353638	14.9871025085449	14.6743183135986	14.8762340545654	14.3922967910767	14.9458980560303	14.9108800888062	IDE	A0A3B3ISG5;A0A7I2V2P6;P14735
12.4779224395752	12.4790496826172	12.7729167938232	12.6610059738159	12.4130020141602	11.9685802459717	12.5558624267578	12.6006689071655	12.6310005187988	12.367938041687	CAAP1	A0A3B3ISJ3;Q9H8G2
14.331561088562	14.5580205917358	14.6023464202881	14.5342311859131	14.4279937744141	14.4321260452271	14.4003801345825	14.7686281204224	14.5766353607178	14.4410572052002	DARS2	A0A3B3ISK7;Q6PI48
11.0628252029419	10.6794452667236	8.78104019165039	9.84918117523193	9.79998970031738	11.6406679153442	11.3245258331299	11.4590711593628	9.14882755279541	10.3955602645874	ANKS1A	A0A3B3ISP1;Q92625
14.9105911254883	15.7911796569824	15.5885324478149	15.7765636444092	15.42431640625	15.5712032318115	15.229923248291	14.5367450714111	15.446608543396	15.4649438858032	COL4A1	A0A3B3ISV3;P02462
14.0714702606201	13.7368354797363	13.8362655639648	13.671443939209	13.5304384231567	13.6601076126099	13.5918226242065	13.7694892883301	13.6611862182617	13.4861602783203	VKORC1L1	A0A3B3ISV4;Q8N0U8
14.0300989151001	14.3412733078003	13.9515323638916	14.1981964111328	14.1131811141968	14.0525684356689	14.131254196167	14.5989570617676	14.1651906967163	14.4191551208496	;LRRC57;LRRC57	A0A3B3ISV5;H3BSW0;Q8N9N7
9.91980361938477	9.73333549499512	9.97839736938477	10.6172504425049	10.3827810287476	10.7933826446533	11.2710418701172	10.94069480896	10.4786958694458	11.3706045150757	IFT74	A0A3B3IT46;E5RGX6;E5RH29;E5RIF0;E5RJK3;Q96LB3
11.3612632751465	11.2259721755981	11.4047708511353	12.753360748291	12.4621677398682	12.6243143081665	11.0408782958984	11.0241727828979	10.9839372634888	11.4475231170654	WDR37	A0A3B3IT47;Q9Y2I8
11.667872428894	12.0663146972656	11.6463460922241	12.5488796234131	11.1451253890991	11.5144739151001	11.8758420944214	11.3703660964966	12.0475006103516	10.7231292724609	SNTB1	A0A3B3ITC2;Q13884
13.3173990249634	12.883397102356	13.4432830810547	13.0964946746826	13.4243564605713	12.6129503250122	13.2005090713501	12.7520360946655	13.1038904190063	12.9758949279785	AGK	A0A3B3ITD0;E9PC15;Q53H12
14.2590246200562	16.9361782073975	14.474814414978	16.359073638916	16.4067935943604	16.6653060913086	15.0114498138428	15.9724473953247	15.4849910736084	15.8835287094116	IMPACT	A0A3B3ITH3;J3KT25;J3QRS6;Q9P2X3
15.0932998657227	15.0511016845703	15.1884651184082	15.1226854324341	14.7286548614502	14.774808883667	15.1534643173218	14.2736167907715	14.6331748962402	14.5914134979248	HNRNPL	A0A3B3ITJ4
14.7284917831421	13.2743721008301	14.8074159622192	13.928168296814	14.3195247650146	13.4990701675415	13.8412790298462	13.1746406555176	14.3654413223267	13.5050868988037	ITM2B	A0A3B3ITP9;A0A3B3IU60;Q9Y287
13.2529010772705	13.2160224914551	13.7411260604858	13.2163219451904	13.1887121200562	12.8084058761597	13.7569284439087	12.9347276687622	12.8315334320068	13.304573059082	FARS2	A0A3B3ITR6;O95363
14.6695241928101	14.3881759643555	14.4152975082397	14.3197546005249	14.4469680786133	14.2791929244995	14.1973028182983	14.3225393295288	14.2667112350464	14.0881338119507	RAB12	A0A3B3ITT1;Q6IQ22
19.9692707061768	19.33664894104	19.3431816101074	19.6126708984375	19.2848014831543	19.3947601318359	19.4984455108643	19.18918800354	19.0358047485352	19.0926513671875	RPL29	A0A3B3ITT5;P47914
14.7089796066284	14.8606204986572	14.8346662521362	14.8030319213867	14.8482074737549	15.0090303421021	15.0935373306274	15.0938816070557	14.8155679702759	15.0252885818481	GSK3B	A0A3B3ITW1;A0A7I2YQK0;P49841
15.526008605957	15.7893533706665	16.1845703125	15.847677230835	16.2807025909424	15.8167362213135	15.9388341903687	15.9128427505493	15.9678564071655	15.7076568603516	ABCD3	A0A3B3ITW3;P28288
17.0846061706543	16.6463527679443	16.9937038421631	16.8294296264648	16.749719619751	16.6759548187256	16.8401737213135	16.3513603210449	16.7610530853271	16.5053882598877	THRAP3	A0A3B3ITZ9;Q9Y2W1
11.8815727233887	12.2116508483887	12.3744029998779	12.5502910614014	11.5515584945679	12.2586421966553	12.6658229827881	11.9732751846313	12.0326852798462	12.5576143264771	AMDHD2	A0A3B3IU33;H3BSD5;H3BSV9;H3BT49;H3BTZ6;Q9Y303
16.0235347747803	16.0274658203125	14.4039459228516	15.2190599441528	15.1692714691162	15.7063064575195	13.8130826950073	15.161093711853	14.4697847366333	14.4760475158691	GEMIN2	A0A3B3IU42;H0YDP6;H0YEL0;O14893
16.9406433105469	16.895471572876	16.7378559112549	16.8041133880615	16.8798217773438	17.0116367340088	16.7635974884033	16.7847766876221	16.8671951293945	16.8210887908936	MCM4	A0A3B3IU45;P33991
13.906120300293	13.6841564178467	13.6991024017334	13.3324947357178	14.1851453781128	14.03293800354	14.029468536377	14.0454177856445	13.9964303970337	14.1857681274414	EML1	A0A3B3IU69;F8W717;G3V3N9;G3V500;O00423
13.9747533798218	14.7275009155273	14.9462614059448	14.7382326126099	14.7368040084839	14.6086549758911	14.9501762390137	14.8174209594727	14.7483854293823	14.7303409576416	EIF2B5	A0A3B3IUB1;Q13144
16.9621543884277	16.8503303527832	16.859546661377	16.773530960083	17.1805858612061	16.6685771942139	16.5852680206299	17.1488952636719	16.8255519866943	16.7675971984863	HM13	A0A3B3IUB5;Q8TCT9
14.0800561904907	13.6602668762207	13.7966022491455	13.8004398345947	13.7253322601318	13.6774311065674	13.5192413330078	13.6932458877563	13.6414747238159	13.485161781311	GLA	A0A3B3IUC4;A0A6Q8PFA9;A0A6Q8PHD1;P06280
13.1078786849976	13.10680103302	12.675573348999	12.9300079345703	12.8746929168701	12.6927328109741	12.9795818328857	12.9772672653198	12.6196374893188	12.8303804397583	MSTO1	A0A3B3IUD2;Q9BUK6
15.3061981201172	15.0856733322144	15.2187213897705	15.2103652954102	15.0624494552612	15.0113458633423	14.9633359909058	15.1155204772949	15.0797719955444	15.0281381607056	PDCD11	A0A3B3IUD7;Q14690
14.767430305481	14.3173494338989	14.4809408187866	14.4873027801514	14.1880741119385	14.5230512619019	14.6141977310181	14.3279457092285	14.4247932434082	14.2475175857544	ARID1B	A0A3F2YNW7;A0A6Q8NVI4;Q8NFD5
14.978138923645	14.5510292053223	13.3979206085205	14.5392351150513	14.3355503082275	14.3379554748535	13.3320741653442	13.6455993652344	14.1573524475098	14.2636747360229	KIF18B	A0A494BYR6;Q86Y91
12.9049272537231	12.6133508682251	12.7256059646606	12.8808670043945	12.4271564483643	13.1414318084717	12.9249496459961	12.3869533538818	12.6778831481934	12.6052474975586	TACC3	A0A494BZT8;Q9Y6A5
15.6301908493042	15.5036373138428	15.5800752639771	15.5421152114868	15.4631948471069	15.3535394668579	15.4974451065063	15.4484357833862	15.4959621429443	15.4502229690552	MPRIP	A0A494BZV2
17.70556640625	17.6820602416992	17.9696235656738	17.7723331451416	17.9763832092285	17.7114677429199	17.9135284423828	17.7761611938477	17.9741954803467	17.6742553710938	DEK	A0A494C028;P35659
14.0227861404419	13.5928268432617	14.2809715270996	14.4256572723389	13.1042633056641	14.4372310638428	13.9605226516724	13.5922069549561	14.1920585632324	13.5801649093628	SP3	A0A494C070;A0A494C0Z6;A0A494C1G8;H0Y6K5;H0Y7L6;Q02447
14.6195611953735	14.749659538269	14.3369436264038	14.6398916244507	14.3347406387329	14.6106262207031	14.7527360916138	13.7104721069336	14.6662168502808	14.6001758575439	UROD	A0A494C085;P06132
14.440673828125	14.4662837982178	14.7156505584717	14.4695901870728	14.5367517471313	14.5982265472412	14.8884840011597	14.8051624298096	14.6824913024902	14.6353206634521	RAD23A	A0A494C0B4;P54725
15.9792213439941	15.6503458023071	15.7209415435791	15.6881484985352	15.7278833389282	15.4791650772095	15.4321575164795	15.3325805664063	15.577278137207	15.5756959915161	AGRN	A0A494C0G5
13.8818798065186	13.9140853881836	13.7719306945801	14.0498285293579	13.689169883728	14.034351348877	13.833945274353	13.6500339508057	13.7884216308594	13.8717260360718	PARN	A0A494C0K5;A0A494C0W0;O95453
13.4138145446777	12.9348020553589	13.0002508163452	13.2936677932739	12.6560983657837	12.588267326355	12.6338090896606	13.077317237854	13.0253505706787	13.0313653945923	CIZ1	A0A494C0L7;F5H2X7;H0Y5D5;Q5SYW2;Q9BTG3;Q9ULV3
15.9478015899658	16.0352535247803	15.9642057418823	16.1092567443848	16.0533638000488	16.0627613067627	16.0483264923096	16.1296520233154	16.0886058807373	16.0639266967773	CLUH	A0A494C0R8
14.1375541687012	14.0072164535522	13.8770370483398	14.4058036804199	13.9287242889404	14.1669635772705	13.9277648925781	14.276291847229	14.0210294723511	14.0012502670288	MZT2B	A0A494C0V9;B8ZZ87;Q6NZ67
12.6027822494507	13.0148677825928	13.8155927658081	13.6689624786377	13.2032070159912	13.1166801452637	13.2256460189819	13.2374668121338	13.4774608612061	13.4235935211182	STING1	A0A494C0W5;Q86WV6
18.9575996398926	19.5858898162842	19.9211883544922	19.7180709838867	19.6643505096436	19.2848491668701	19.6446418762207	19.5660839080811	19.3479423522949	19.3601551055908	RAB33B	A0A494C0Z5;Q9H082
14.7619762420654	14.0400495529175	14.0549869537354	13.9772987365723	14.1368284225464	13.8673620223999	14.0429964065552	13.7641296386719	13.9314050674438	13.7722396850586	KRI1	A0A494C108;Q8N9T8
13.2434434890747	13.758415222168	13.7228727340698	13.7985124588013	14.0229797363281	13.5714864730835	13.649471282959	13.741795539856	13.6887636184692	13.6063261032104	DIP2A	A0A494C143;Q14689
13.1152305603027	13.5215864181519	13.6814823150635	12.8899669647217	13.4635076522827	13.0022077560425	13.351167678833	12.9023590087891	13.4366598129272	13.1004524230957	PPOX	A0A494C146;P50336
18.954683303833	17.7941589355469	17.9724273681641	18.1602725982666	17.0627136230469	17.3023986816406	17.6778564453125	16.7289257049561	17.1815738677979	17.3011379241943	COX6B1	A0A494C160;P14854
13.4171686172485	13.9429359436035	13.8168973922729	13.5947666168213	13.716667175293	13.5728034973145	13.9779739379883	13.897102355957	13.9546089172363	14.0834465026855	STAT2	A0A494C164;P52630
13.8290281295776	14.4523010253906	14.445276260376	14.1486415863037	14.8174571990967	14.5609912872314	14.5859832763672	14.9370613098145	14.6388750076294	14.7157621383667	PEPD	A0A494C165;P12955
14.7000026702881	15.2261276245117	15.3107604980469	15.1542501449585	15.3491535186768	14.9697332382202	15.1772050857544	15.4642105102539	15.3381519317627	15.273736000061	TPP2	A0A494C1B8;P29144
13.973316192627	13.9807024002075	14.1380453109741	14.1426563262939	13.8935403823853	13.8964338302612	13.9045028686523	13.8862018585205	14.0328960418701	13.7861642837524	LARS2	A0A494C1E0;A0A499FJL2;E9PHM2;Q15031
16.3726787567139	16.1230869293213	16.097240447998	16.1888580322266	16.0004577636719	16.1876544952393	16.1401290893555	16.1648750305176	16.1328048706055	16.016845703125	NUP214	A0A494C1F2;P35658
13.8546466827393	14.1064300537109	14.0418176651001	13.8599424362183	14.1662912368774	13.9108276367188	14.3182067871094	14.3076114654541	14.0546903610229	14.034538269043	SPECC1L;SPECC1L-ADORA2A;SPECC1L	A0A494C1J1;F8WAN1;Q69YQ0
13.3223266601563	13.6467924118042	13.6237354278564	13.6237382888794	13.6013269424438	13.3435735702515	13.8500566482544	13.1193962097168	13.6873064041138	13.4957895278931	LRBA	A0A494C1L5;E9PEM5;P50851
16.6845569610596	16.3065528869629	16.4163074493408	16.8542995452881	16.050874710083	16.1539764404297	16.1676616668701	16.0002689361572	16.0763206481934	16.0374393463135	FKBP2	A0A494C1N0;P26885
14.9660263061523	14.865382194519	14.9415836334229	14.8457555770874	14.6859216690063	14.8314647674561	14.7644872665405	14.9243497848511	14.7422695159912	14.6718626022339	GTF3C3	A0A494C1S7;Q9Y5Q9
16.2566184997559	15.9833126068115	16.1198577880859	16.076099395752	16.0873031616211	15.9583396911621	15.9863138198853	15.9052696228027	16.0486450195313	15.9807395935059	SART3	A0A499FI31;Q15020
17.8291969299316	17.2333030700684	17.2881336212158	17.1608238220215	17.4023380279541	17.1129760742188	17.1695461273193	17.3774394989014	17.1864643096924	17.2126522064209	MYADM	A0A499FIY8;C9JC07;C9JZL8;Q96S97
13.7104654312134	13.2427978515625	13.3506231307983	13.5727882385254	13.2044410705566	13.4276504516602	13.4818229675293	13.35573387146	13.3771772384644	13.4224681854248	WDR26	A0A499FIZ0
15.7261152267456	14.6723985671997	14.3142223358154	14.6822729110718	14.303050994873	14.2590980529785	14.8354978561401	14.2714538574219	15.1866006851196	15.1352729797363	CAPS	A0A499FJ41;K7ES72
13.4451732635498	13.305627822876	12.9281272888184	13.1474885940552	12.7982120513916	12.6237115859985	12.8933305740356	13.0979671478271	13.1256628036499	13.087703704834	IKBKB	A0A499FJS7;O14920
13.3471307754517	13.674596786499	13.4803104400635	13.8152313232422	12.8764991760254	13.4584512710571	13.8751773834229	12.6620225906372	13.7270822525024	13.4002933502197	TSEN34	A0A590UJ73;A0A590UJW4;E7EQB3;Q9BSV6
13.2915077209473	12.8942756652832	13.2091398239136	12.8310699462891	12.93483543396	12.499454498291	13.1256790161133	12.6631679534912	12.9457635879517	12.7479572296143	TMUB1	A0A590UJA9;C9JCW7;C9JE12;Q9BVT8
11.8924980163574	9.88749217987061	9.08942985534668	7.93388223648071	10.5304231643677	9.85197448730469	10.0609970092773	7.19994449615479	8.8847827911377	8.79484176635742	CPEB4;CPEB2;CPEB2;CPEB2;CPEB2;CPEB4;CPEB4;CPEB4;CPEB2;CPEB4;CPEB2;CPEB3	A0A590UJI5;A0A5K1VW61;A0A5K1VW71;A0A5K1VW79;A0A5K1VW93;B7ZLQ8;E5RFP2;E5RJM0;H0Y9D9;Q17RY0;Q7Z5Q1;Q8NE35
18.3825263977051	17.6049098968506	17.98610496521	17.9023151397705	17.6663265228271	17.8265857696533	17.8756484985352	17.3672733306885	17.6362724304199	17.3642272949219	SRSF6;SRSF6;SRSF6;;SRSF6	A0A590UJK4;A0A590UJP7;A0A590UK01;A0A590UK80;Q13247
12.1980314254761	13.2194919586182	13.5905904769897	13.1191959381104	12.8952236175537	12.7346334457397	12.058388710022	12.0138301849365	12.2890071868896	12.9768285751343	MSH3	A0A590UJN8;A0A590UJW0;P20585
14.4170999526978	14.1335830688477	14.3861818313599	14.2219877243042	14.1001863479614	14.1344289779663	14.4929647445679	14.1718435287476	14.0840692520142	13.9807529449463	NIPBL	A0A590UJS4;Q6KC79
14.9709215164185	15.1016244888306	15.0020217895508	15.0197820663452	15.0599308013916	15.1372690200806	15.203179359436	15.0172519683838	15.1135330200195	15.1888284683228	ITCH	A0A590UK44;Q96J02
13.2467365264893	13.4487247467041	13.7654390335083	13.2823314666748	13.7126598358154	13.2883310317993	13.9521799087524	13.7672367095947	13.5827741622925	13.5492496490479	AMPD2	A0A5F9UK94;H0Y360;Q01433
14.6035652160645	14.9386730194092	15.0743312835693	15.1836223602295	14.7913942337036	14.8802909851074	14.8866558074951	14.8513126373291	14.990837097168	15.0590419769287	SDF4	A0A5F9UP49;Q9BRK5
10.9468355178833	11.7234420776367	12.1391754150391	11.7847299575806	12.4453582763672	11.7005996704102	12.2351684570313	12.4436960220337	12.3880033493042	11.8541498184204	TGOLN2	A0A5F9UY30;A0A5H1ZRP2;O43493
15.3417358398438	15.3877849578857	15.3529748916626	15.241623878479	15.4242353439331	15.3726215362549	15.1803941726685	15.3125982284546	15.2453107833862	15.2743711471558	CSNK1A1	A0A5F9W493
14.2280550003052	14.5064907073975	14.5059156417847	14.514988899231	14.6119050979614	14.4481325149536	14.2452821731567	14.5426387786865	14.4463167190552	14.4582576751709	SPCS1	A0A5F9YFS9
14.5006465911865	15.0605554580688	15.1338033676147	14.8725309371948	15.3598222732544	14.9192504882813	14.9359455108643	14.8331642150879	15.0926160812378	14.9045991897583	ALDH3A2	A0A5F9ZGX4;A0A5F9ZHI5;A0A5F9ZHN9;A0A5F9ZI12;J3QRD1;P51648
14.7994413375854	14.6846075057983	14.9858207702637	14.9213714599609	14.9575471878052	14.7456502914429	14.7060317993164	14.6786088943481	14.7556943893433	14.7030200958252	JAK1	A0A5F9ZH07;A0A5F9ZHN8;A0A5F9ZHW0;A0A5F9ZI39;P23458
14.7846965789795	14.5613861083984	14.3902225494385	14.5726566314697	14.4944133758545	14.3565254211426	14.295295715332	13.2503433227539	14.4426918029785	14.1622247695923	ACP2	A0A5F9ZH40;A0A5F9ZH82;A0A5F9ZHR7;A0A5F9ZI20;B7Z6U3;E9PHY0;P11117
16.400089263916	16.8719100952148	16.7432823181152	16.8761444091797	16.9794178009033	17.1156463623047	16.7149772644043	16.868278503418	16.8721446990967	16.8241882324219	ASCC1	A0A5F9ZH79;A0A5F9ZHP1
13.054744720459	12.9613342285156	13.5320358276367	13.1762619018555	13.3146324157715	13.388822555542	13.152943611145	13.3002624511719	13.1260747909546	13.369873046875	PRIM1	A0A5F9ZHB6;P49642
15.1993188858032	14.8451404571533	14.9991369247437	14.8821573257446	15.0497493743896	14.8909788131714	14.8864631652832	15.0869808197021	14.9880027770996	14.7509908676147	SACM1L	A0A5F9ZHN7;Q9NTJ5
10.7849054336548	11.5151405334473	11.9759082794189	11.2356958389282	11.7612524032593	11.3284215927124	11.6207876205444	11.6736993789673	11.548752784729	11.3004913330078	MEN1	A0A5F9ZHS3;E7EN32;O00255
13.7557401657104	13.8614959716797	13.3791255950928	13.5693731307983	13.4674110412598	13.7496671676636	13.6376295089722	13.959789276123	13.2767333984375	13.3510036468506	PRIM2	A0A5F9ZHU7;P49643
15.5523977279663	15.6885366439819	15.8704395294189	15.648868560791	15.6986827850342	15.5404167175293	15.5461139678955	15.8662233352661	15.6924076080322	15.6371278762817	BRI3BP	A0A5F9ZHY7;Q8WY22
15.0036420822144	15.2188625335693	15.1552057266235	15.1113862991333	14.9931793212891	15.1372480392456	15.2891473770142	15.1635465621948	15.1304740905762	15.1068124771118	ARHGEF2	A0A5F9ZI21;Q92974;V9GYM8
14.0691061019897	13.5155477523804	12.6449766159058	12.8282804489136	12.9032802581787	13.3323812484741	12.989200592041	12.8333425521851	13.4289712905884	13.0867338180542	NELFB	A0A5H1ZRP4
12.4523344039917	11.1501760482788	10.2090263366699	10.1831178665161	10.9523868560791	11.7488403320313	11.0922145843506	10.2111396789551	10.8712558746338	10.3243913650513	IGKC	A0A5H1ZRQ3;P01834
15.0072069168091	14.7218189239502	14.7970323562622	14.7639837265015	14.402904510498	14.5731706619263	14.9323263168335	14.8051986694336	14.618597984314	14.5817928314209	PCM1	A0A5H1ZRS1
12.822093963623	12.0333738327026	11.9920825958252	12.1035499572754	12.2261829376221	12.3629922866821	12.4128665924072	11.6816930770874	11.9253234863281	12.039722442627	WFS1	A0A669KAX3;O76024
14.2580585479736	14.9627771377563	14.8875522613525	14.8697233200073	15.1595449447632	14.8991031646729	15.0342025756836	15.0897045135498	15.0846309661865	15.0136165618896	CUL4B	A0A669KAX4;A0A7P0T954;K4DI93;Q13620
13.9143333435059	14.186863899231	14.1672630310059	14.2222766876221	13.9830074310303	14.0382976531982	14.0642004013062	14.4026126861572	14.1336832046509	14.2302799224854	GBF1	A0A669KB10;A0A669KBG8;A0A7I2V2L5;A0A7I2V452;A0A7I2YQ65;A0A7I2YQM2;A0A7P0RGV0;Q92538
14.7157821655273	14.7339706420898	14.7261533737183	14.6667251586914	13.8153676986694	14.1097755432129	14.6876497268677	13.7527370452881	14.3866720199585	14.456615447998	EP300	A0A669KB12;Q09472
15.1611137390137	14.800950050354	13.9652261734009	13.9464979171753	13.7718276977539	15.2399463653564	13.6570119857788	13.9198923110962	13.4180517196655	13.8543815612793	DUS4L-BCAP29;DUS4L-BCAP29;BCAP29	A0A669KB27;A0A669KBH7;Q9UHQ4
16.9463157653809	17.6617641448975	17.5232944488525	17.4804630279541	17.7073268890381	17.6652927398682	17.7039527893066	17.9220581054688	17.7659683227539	17.7564811706543	STAT1	A0A669KB53;A0A669KB56;A0A669KB68;A0A669KBA4;P42224
16.09792137146	16.0328216552734	16.0661315917969	16.0495433807373	16.125997543335	16.1975288391113	16.1995010375977	16.1973342895508	16.3578109741211	16.387243270874	CTNND1	A0A669KB62
11.8238477706909	12.9026260375977	12.3793411254883	12.3763360977173	11.9012994766235	12.2571907043457	12.2271823883057	12.0680828094482	12.383243560791	12.3478031158447	CUL7	A0A669KBH4;Q14999
15.6399259567261	15.2482833862305	15.3984174728394	15.3848266601563	15.1904354095459	15.0561389923096	15.3475494384766	15.0280113220215	15.2060298919678	15.0077028274536	ADNP	A0A669KBJ7;Q9H2P0
15.7072858810425	15.8920803070068	15.8859310150146	15.8027400970459	15.9587440490723	15.8471269607544	15.8661870956421	15.9747638702393	15.8867607116699	15.8835792541504	USP7	A0A669KBL1;Q93009
13.6814107894897	13.7280187606812	13.7794733047485	13.3257579803467	13.3108444213867	13.6936826705933	13.6678771972656	11.3205966949463	13.1822452545166	13.5342035293579	FRYL	A0A6E1XQM6;F2Z2S2;O94915
16.5039882659912	16.9071407318115	16.8598022460938	16.8058166503906	16.9240379333496	16.8159351348877	16.8546962738037	16.9468479156494	16.8507671356201	16.7567005157471	LARS1	A0A6I8PIV1;A0A6I8PL42;B4DER1;Q9P2J5
12.8770208358765	12.0505743026733	11.8673553466797	12.7058687210083	12.4878158569336	12.4950675964355	12.7788286209106	13.4568328857422	12.7513122558594	12.9378900527954	HSPA12A	A0A6I8PIW1;O43301
11.3493518829346	11.689507484436	11.7218313217163	11.7545213699341	11.3609104156494	11.0679407119751	11.9966382980347	11.4902181625366	11.4675960540771	11.0527505874634	SVIL	A0A6I8PIX7;O95425
14.1360006332397	14.0419893264771	14.0182409286499	14.0579948425293	13.9090003967285	13.9605741500854	13.8920774459839	14.6713151931763	13.8879728317261	13.8386011123657	GNL3L	A0A6I8PL80;A0A6I8PS19;Q9NVN8
17.0098247528076	17.2292041778564	17.0595779418945	17.1523990631104	17.1031398773193	17.2120532989502	17.1464805603027	17.302562713623	17.2725353240967	17.3195304870605	DNAJC7	A0A6I8PS32;A0A6I8PUD4;Q99615
14.6649808883667	14.7107467651367	14.8834037780762	14.8869981765747	14.4923658370972	14.6592178344727	14.7591552734375	14.4742946624756	14.7999238967896	14.657187461853	GOLGA2	A0A6Q8KRG2;Q08379
11.3604736328125	11.4978008270264	11.0226497650146	11.436861038208	10.9870643615723	11.2400894165039	11.7455625534058	11.6108570098877	11.1375064849854	11.0345230102539	CEP41	A0A6Q8PEV5;A0A6Q8PF12;A0A6Q8PFB1;A0A6Q8PFB5;A0A6Q8PGR4;A0A6Q8PGX0;A0A6Q8PH03;A0A7I2PK71;A0A7I2SYM4;Q9BYV8
13.3262977600098	14.0627975463867	14.2536373138428	13.9799709320068	14.2285976409912	14.2253570556641	14.432183265686	14.539852142334	14.4305896759033	14.434983253479	ELP1	A0A6Q8PEX6;A0A6Q8PFB7;A0A6Q8PG86;A0A6Q8PGW3;A0A6Q8PHF4;O95163
12.101788520813	12.2637310028076	12.6270999908447	12.5028114318848	12.0434579849243	12.2955141067505	12.7302913665771	12.7614812850952	12.4760999679565	12.0979471206665	NDE1	A0A6Q8PEY3;A0A6Q8PGV6;I3L3G9;I3L522;Q9NXR1
12.9591836929321	10.4012937545776	12.376953125	12.535062789917	13.4090251922607	10.6547555923462	11.4597234725952	12.9438037872314	12.3725214004517	11.9446287155151	PTBP2	A0A6Q8PEZ3;A0A6Q8PFC0;A0A6Q8PFE6;A0A6Q8PH43;A0A7I2RVZ4;B4DI28;Q9UKA9
14.0161428451538	14.3361797332764	14.726375579834	14.5070753097534	14.5945472717285	14.2915525436401	14.6308717727661	14.5805559158325	14.5305194854736	14.3016319274902	CLCC1	A0A6Q8PEZ7;A0A6Q8PFF7;A0A6Q8PG30;A0A6Q8PG75;A0A6Q8PGA4;A0A6Q8PHQ1;Q96S66
11.6273717880249	8.5317497253418	12.2687883377075	10.1588068008423	10.1735763549805	9.73109531402588	12.3697481155396	11.6683740615845	11.4862937927246	11.6260108947754	NEBL	A0A6Q8PF21;O76041
15.9018306732178	15.9179639816284	15.5926818847656	15.664023399353	15.6151542663574	16.0167808532715	15.9153804779053	15.6688661575317	15.5920639038086	15.8350858688354	CHMP1A	A0A6Q8PF35;A0A6Q8PG85;F5H875;F8VUA2;Q9HD42
14.9542932510376	15.0752353668213	15.1144886016846	14.9896297454834	15.2839345932007	15.1960945129395	15.1757097244263	15.3192834854126	15.2017297744751	15.1047697067261	KIF2A	A0A6Q8PFA6;A0A6Q8PH57
14.2037229537964	15.3834981918335	15.5880432128906	15.1635074615479	16.0707664489746	15.3477582931519	15.2703447341919	15.0735692977905	15.380970954895	15.019434928894	GNB4	A0A6Q8PFE0;A0A6Q8PFV8;A0A6Q8PFW8;H7C5J5;Q9HAV0
17.9554538726807	17.6976089477539	17.9084491729736	17.7833480834961	17.6942100524902	17.5123901367188	17.6877822875977	17.69651222229	17.802864074707	17.6677780151367	AIFM1	A0A6Q8PFE1;A0A6Q8PFM5;A0A6Q8PG15;A0A7I2PK44;O95831
14.9590406417847	13.9577903747559	13.6650609970093	13.9859113693237	12.264214515686	14.1827201843262	13.6719694137573	12.3753442764282	13.27174949646	13.3995637893677	ACTB	A0A6Q8PFE4
15.0610847473145	15.0029077529907	14.6673755645752	15.1110410690308	14.5464172363281	14.703031539917	14.5858449935913	14.0242357254028	14.7367916107178	14.3330135345459	POMK	A0A6Q8PFG8;A0A6Q8PFH3;Q9H5K3
16.0680351257324	16.162504196167	16.0935440063477	16.3420009613037	16.2945861816406	16.0675964355469	16.1378879547119	15.9236183166504	16.1302146911621	16.0721836090088	NEDD4L	A0A6Q8PFI7;A0A6Q8PGP5;A0A6Q8PHJ5;Q96PU5
21.2142887115479	20.9366760253906	20.9250469207764	20.9284839630127	20.9496440887451	20.8243160247803	20.8552856445313	20.8170223236084	20.8819961547852	20.82275390625	LMNA	A0A6Q8PFJ0;P02545
14.0084838867188	14.6577787399292	14.4539251327515	14.7420196533203	14.472207069397	14.7496032714844	14.2939767837524	14.6456861495972	14.4236335754395	14.564414024353	MFN2	A0A6Q8PFJ4;A0A6Q8PGS9;A0A6Q8PGV8;O95140
13.9532814025879	15.0461578369141	14.9058828353882	14.9514684677124	15.1659917831421	14.7098617553711	15.1495742797852	15.0504875183105	14.9845314025879	15.1528606414795	PAFAH1B1	A0A6Q8PFU3;P43034
16.6809825897217	17.1636085510254	16.8750038146973	16.9354000091553	16.9507846832275	17.0327014923096	17.0387325286865	17.2236785888672	17.0094547271729	17.219554901123	AARS1	A0A6Q8PFY2;A0A6Q8PGN5;P49588
11.4550151824951	12.0011653900146	11.7170104980469	11.8731346130371	12.3589153289795	12.3313417434692	12.5261096954346	11.3099975585938	12.1933917999268	12.2154216766357	FANCD2	A0A6Q8PFY3;Q9BXW9
17.9985427856445	18.2069473266602	18.1833534240723	18.036190032959	18.2501888275146	18.1435222625732	18.1230030059814	18.4105472564697	18.2746982574463	18.3019886016846	TFG	A0A6Q8PFY7;Q92734
15.6410913467407	15.2153100967407	15.3394241333008	15.3548765182495	15.0697078704834	15.2325468063354	15.2160930633545	15.1012935638428	15.1617803573608	15.1355867385864	POLR2A	A0A6Q8PGB0;P24928
13.6663808822632	11.0183019638062	13.2222194671631	13.3413162231445	13.3725347518921	13.4626636505127	13.4958543777466	13.5515327453613	12.7115354537964	13.309591293335	FANCI	A0A6Q8PGF4;A0A6Q8PH09;H3BP78;Q9NVI1
15.9622364044189	16.1034259796143	15.9504308700562	16.0146255493164	15.8698835372925	16.0228176116943	16.0414505004883	16.1823539733887	15.9433946609497	16.1183910369873	INF2	A0A6Q8PGN3;A0A6Q8PH71;A0A6Q8PHA2;A0A6Q8PHG2;Q27J81
15.3827848434448	16.5032730102539	15.4205570220947	15.7137613296509	15.8769702911377	16.2524662017822	15.2330465316772	15.4175653457642	15.6374006271362	15.6414241790771	MTMR2	A0A6Q8PGS5;C9JEX3
13.6679697036743	13.5201864242554	13.3931331634521	13.6929397583008	13.3758707046509	13.4722576141357	13.4584112167358	13.5921030044556	13.3875503540039	13.5456771850586	SPATA5	A0A6Q8PGU6;Q8NB90
12.0536613464355	12.7207384109497	13.2619400024414	12.2704925537109	13.4619617462158	12.8825788497925	12.9276332855225	13.2288732528687	12.5106372833252	12.5439910888672	SLC12A6;SLC12A6;SLC12A4;SLC12A6;SLC12A4	A0A6Q8PH21;B3KXX3;I3L4N6;Q9UHW9;Q9UP95
16.1221389770508	16.7260074615479	16.6476211547852	16.5013408660889	16.8134422302246	16.6203994750977	16.7942237854004	16.9887981414795	16.7121925354004	16.8310508728027	HARS1;HARS1;	A0A6Q8PHA5;P12081;SYH_HUMAN
12.6407070159912	11.8044300079346	12.3248519897461	13.3067865371704	12.8136749267578	11.2509784698486	10.2673501968384	12.566460609436	12.8999328613281	12.3626556396484	KAT7	A0A6Q8PHH2;O95251
14.7578048706055	14.5802869796753	14.6613168716431	14.6694631576538	14.5263814926147	14.6328144073486	14.6324634552002	14.7467164993286	14.4641723632813	14.5519380569458	TRIP12	A0A6Q8PHK0
13.9262475967407	14.7010822296143	14.5192365646362	14.6703615188599	14.8385887145996	14.7169885635376	14.7411823272705	14.7687797546387	14.8416137695313	14.8401460647583	NT5C2	A0A6Q8PHP0;P49902
12.2994165420532	13.2241973876953	13.9223432540894	13.4507884979248	12.1073188781738	13.2026538848877	13.1193313598633	11.2552289962769	13.3301095962524	12.1611156463623	SLC9A6	A0A7I2V2B0;Q92581
16.6458568572998	17.166296005249	16.9948654174805	17.131010055542	17.0382881164551	17.1594104766846	17.1704406738281	17.0616359710693	17.0317897796631	17.0771293640137	HGS	A0A7I2V2D8;A0A7I2V2K2;A0A7I2V2R9;A0A7I2V2W5;A0A7I2V307;A0A7I2V3F9;A0A7I2V3I8;A0A7I2V3J3;A0A7I2V5A2;A0A7I2V5A3;O14964
12.9294185638428	13.2909755706787	13.0227870941162	13.1972208023071	12.979998588562	13.1736612319946	13.1380491256714	13.0627698898315	12.9482717514038	12.6813821792603	MARK3	A0A7I2V2E3;A0A7I2V2N8;A0A7I2V2U9;A0A7I2V3B9;A0A7I2V3I9;A0A7I2V409;A0A7I2V4G7;A0A7I2V4K8;A0A7I2V4T2;A0A7I2V5G3;A0A7I2V639;A0A7I2YQF7;H0YJI9;H0YKP9;J3KNR0;P27448
15.0567626953125	14.8315153121948	14.8133945465088	14.9105606079102	14.7587299346924	14.8412427902222	15.0080862045288	14.8859252929688	14.9487295150757	14.8201770782471	TBK1	A0A7I2V2F4;A0A7I2V4W4;A0A7I2V646;Q9UHD2
20.3245315551758	19.8012924194336	19.8043174743652	19.997034072876	19.7674140930176	19.8607940673828	19.8151321411133	19.8576488494873	19.7727699279785	19.7556991577148	ITGB1	A0A7I2V2F9;E7EUI6;H7C4K3;P05556
16.1106128692627	16.6664638519287	16.5972328186035	16.4766826629639	16.6554622650146	16.4261131286621	16.5651721954346	16.5711040496826	16.6097564697266	16.5853519439697	STAT3	A0A7I2V2G1;A0A7I2V395;A0A7I2V3V0;A0A7I2V444;A0A7I2V4C8;A0A7I2V4R2;A0A7I2V4R3;A0A7I2V5N9;A0A7I2YQD2;A0A7I2YQI1;A0A7I2YQR5;P40763
22.0752620697021	21.4351921081543	21.5870609283447	21.6031017303467	21.3354454040527	21.3303871154785	21.3823585510254	21.4036521911621	21.4128189086914	21.343900680542	HSPA9	A0A7I2V2G2;D6RCD7;P38646
16.9761409759521	17.1438541412354	17.0694561004639	17.0553874969482	17.3612957000732	17.208532333374	17.074535369873	17.3820285797119	17.1659526824951	17.1457748413086	EIF3E	A0A7I2V2H9;A0A7I2V2W0;A0A7I2V3I0;A0A7I2V3S3;P60228
17.5731163024902	17.7549133300781	17.677417755127	17.7648696899414	17.853572845459	18.0032005310059	17.6246681213379	17.7079162597656	17.7272834777832	17.7138023376465	NACA	A0A7I2V2K5;A0A7I2V473;E9PAV3;F8VZJ2;H0YHX9;Q13765
16.9293785095215	16.4995193481445	16.6382064819336	16.3242874145508	16.6048603057861	16.3649406433105	16.2932109832764	16.2106380462646	16.524471282959	16.359338760376	CTSC	A0A7I2V2Q8;A0A7I2V466;A0A7I2V6E3;P53634
18.7807655334473	18.8146553039551	19.0397090911865	18.8645973205566	19.1797065734863	18.860481262207	18.8947563171387	18.6805839538574	18.9725456237793	18.5891342163086	HNRNPA3	A0A7I2V2R3;A0A7I2V5D8;P51991
14.1932563781738	14.1268119812012	14.5976390838623	13.8026332855225	14.788028717041	14.2278823852539	14.4055728912354	13.7721538543701	14.8680639266968	14.5163993835449	DPP4	A0A7I2V2R5;A0A7I2V2X8;P27487
16.3058013916016	16.3987522125244	16.3819332122803	16.3156833648682	16.193826675415	16.4262676239014	16.2908802032471	16.2702941894531	16.32444190979	16.2656574249268	IMPDH2	A0A7I2V2T3;H0Y4R1;P12268
16.2529220581055	16.554515838623	16.3160438537598	16.319019317627	16.4377689361572	16.5178527832031	16.4494361877441	16.8177452087402	16.5594882965088	16.7413063049316	SGTA	A0A7I2V2U2;A0A7I2V4T9;A0A7I2V588;A0A7I2V5Z3;O43765
14.4074373245239	15.0970487594604	15.2091827392578	15.0503463745117	14.3690376281738	14.2639265060425	15.0724639892578	14.3527812957764	14.5623359680176	14.2921333312988	MTHFD2	A0A7I2V2U6;P13995
14.9267349243164	15.0464391708374	15.1588878631592	15.1545724868774	14.8041162490845	14.7817497253418	14.9636173248291	14.8974418640137	14.9087448120117	15.0263900756836	ACBD5	A0A7I2V2Y9;A0A7I2V5E1;A0A7I2YQD7;A0A7I2YQE9;B7Z2R7
19.3352928161621	17.6810665130615	17.5748920440674	18.1006050109863	16.3275508880615	17.6353416442871	17.3472671508789	16.3042488098145	16.6972808837891	17.1860771179199	HNRNPA2B1	A0A7I2V323;A0A7I2V3P1;A0A7I2V4N1
17.6751613616943	17.5904960632324	17.6549949645996	17.7029457092285	17.6501235961914	17.9233818054199	17.7910614013672	17.9109954833984	17.507833480835	17.510383605957	KPNA2	A0A7I2V351;A0A7I2V487;A0A7I2YQE1;P52292
15.5941591262817	15.7741565704346	15.8611335754395	15.8281707763672	16.1159687042236	15.8343458175659	15.62864112854	16.1344337463379	15.9484424591064	15.7616004943848	COMT	A0A7I2V370;P21964
15.9667663574219	15.6948461532593	15.8076324462891	15.7700967788696	15.7450952529907	15.6515645980835	15.7432718276978	15.5745630264282	15.7769689559937	15.6414461135864	PITRM1	A0A7I2V397;A0A7I2V5C6;A0A7I2YQT2;Q5JRX3
13.5296287536621	14.5066003799438	14.3381662368774	13.9735879898071	14.7718877792358	14.4192342758179	14.5455455780029	15.2085037231445	14.5663642883301	14.9278936386108	YKT6	A0A7I2V3A1;A0A7I2V3V7;A0A7I2V4L6;O15498
12.6670408248901	13.3725242614746	13.3941268920898	12.9408321380615	13.0287647247314	13.4910449981689	13.5624513626099	13.1463108062744	12.971851348877	13.1427621841431	KIF11	A0A7I2V3A9;P52732
16.8072338104248	16.6909484863281	16.6677360534668	16.848014831543	16.5702381134033	16.6387691497803	16.6304721832275	16.7031917572021	16.5524673461914	16.6105537414551	SCFD1	A0A7I2V3B4;A0A7I2V4B8;A0A7I2V5I2;Q8WVM8
13.1689605712891	13.2909870147705	13.2916383743286	13.3551378250122	13.2093906402588	13.4426746368408	12.6868085861206	13.1655721664429	13.0250673294067	13.151195526123	RSL24D1	A0A7I2V3F2;H3BMQ2;Q9UHA3
20.8051910400391	20.7428684234619	20.9201793670654	20.932466506958	21.0989856719971	20.9184150695801	20.6806869506836	20.1578044891357	20.8211631774902	20.4450740814209	HNRNPA1	A0A7I2V3R8;F8W6I7;P09651
16.3521175384521	16.391752243042	15.4787664413452	16.2695350646973	16.3282489776611	16.5211734771729	9.80136299133301	15.5681447982788	10.8597850799561	14.3763313293457	BTF3	A0A7I2V3T6;A0A7I2YQL2
14.108172416687	13.1349277496338	13.9207830429077	13.4081687927246	13.7136144638062	12.8515796661377	13.8607387542725	12.9583740234375	13.8615989685059	13.6723976135254	ATP6AP1	A0A7I2V3T8;A0A7I2YQA5;Q15904
16.422945022583	15.9927358627319	16.1222095489502	16.0810794830322	15.9186172485352	15.8661327362061	16.0636367797852	15.7919445037842	16.0775547027588	15.9013452529907	ADAM9	A0A7I2V3W3;A0A7I2V4B3;Q13443
14.5847434997559	14.2568168640137	14.5488319396973	14.4129610061646	14.2910289764404	14.238187789917	14.2085475921631	13.835334777832	14.4459943771362	14.1620416641235	SPECC1	A0A7I2V416;A0A7I2V451;A0A7I2V486;A0A7I2YQJ3;A0A7P0TBP2;Q5M775
20.2275218963623	20.075984954834	20.2306308746338	20.1255283355713	20.2607917785645	20.1489372253418	20.2047958374023	20.2042846679688	20.1621379852295	20.0578422546387	NCL	A0A7I2V428;C9JLB1;P19338
17.3359394073486	17.4479427337646	17.423921585083	17.4145660400391	17.5407104492188	17.477596282959	17.4071655273438	17.4107532501221	17.4769496917725	17.4026947021484	DDX1	A0A7I2V430;A0A7I2V4F0;Q92499
14.2368059158325	13.3631763458252	13.4684734344482	13.5897254943848	13.099630355835	13.3103370666504	13.4013118743896	13.1511726379395	13.1768274307251	13.1893682479858	HNRNPA1	A0A7I2V434
18.0441093444824	18.2706203460693	18.2172241210938	18.1310501098633	18.4174518585205	18.1976490020752	18.3891010284424	18.2133235931396	18.355770111084	18.165002822876	CTSB	A0A7I2V440;E9PHZ5;P07858
16.7089519500732	17.3275508880615	17.0752792358398	17.0626792907715	17.5091190338135	17.26877784729	17.1288299560547	17.4492797851563	17.2936115264893	17.3441333770752	XPO1	A0A7I2V461;O14980
16.1647205352783	16.096284866333	16.3267612457275	16.2975749969482	16.3522987365723	16.4443969726563	16.5074481964111	16.302074432373	16.2028408050537	16.0186805725098	DNMT1	A0A7I2V490;A0A7I2V5D0;P26358
11.9270458221436	12.2468700408936	12.7233085632324	11.9792356491089	12.364598274231	11.6042194366455	12.4380073547363	12.1479415893555	12.2148494720459	11.9447336196899	ST3GAL4	A0A7I2V4F4;A0A7I2V4R4;A0A7I2V4V4;A0A7I2V5F3;A0A7P0RGI5;E9PQZ2;Q11206
13.7987079620361	13.9410524368286	14.1782560348511	14.0500202178955	14.2717943191528	13.7038116455078	14.5146112442017	13.9844703674316	14.2471599578857	13.8669176101685	ZC3H13	A0A7I2V4I5;Q5T200
16.8381252288818	16.9311752319336	17.2854232788086	17.1030559539795	17.186975479126	17.0681037902832	17.4026374816895	17.3674716949463	17.3650569915771	17.2540817260742	LAMB1	A0A7I2V4J9;G3XAI2;P07942
15.2095470428467	15.3779554367065	15.0689783096313	15.0462875366211	15.8060894012451	15.2091035842896	15.0158157348633	14.6101560592651	15.6339721679688	15.2244739532471	CTSA	A0A7I2V4K5;P10619;X6R5C5;X6R8A1
17.0273990631104	17.059268951416	17.0304183959961	16.9125881195068	16.9923095703125	17.0648727416992	17.0701847076416	16.9569873809814	16.9703216552734	17.0434417724609	PABPC4	A0A7I2V4L7;B1ANR0;Q13310
18.0772933959961	18.106912612915	18.0629024505615	18.062837600708	18.1558208465576	18.2410755157471	18.0790252685547	17.8836441040039	18.0080909729004	18.0653266906738	NMT1	A0A7I2V539;P30419
14.1546459197998	12.8015270233154	12.8680629730225	13.7780685424805	13.1185054779053	13.1645002365112	13.3013753890991	12.7592802047729	13.5837669372559	13.2794904708862	COQ8B	A0A7I2V544;A0A7I2V5Z5;M0R0L2;Q96D53
15.8289709091187	15.7223739624023	15.7684154510498	15.732518196106	15.7408695220947	15.8311977386475	15.5284471511841	15.3866357803345	15.4934682846069	15.6161508560181	BCL2L1	A0A7I2V597;Q07817;Q5QP56;Q5TE64;Q9H1R6
14.4221324920654	15.3990268707275	15.550684928894	15.331524848938	15.3423900604248	14.9628782272339	14.9460639953613	14.5986499786377	14.903076171875	15.0283365249634	MKRN2	A0A7I2V5D2;A0A7I2YQI0;C9J494;Q9H000
16.6687488555908	16.4612083435059	16.0749340057373	15.8868379592896	16.2162704467773	16.4997425079346	16.1401863098145	15.8254356384277	16.1755237579346	16.1168117523193	CTSL	A0A7I2V5M3;P07711
13.9110994338989	13.8371963500977	14.1285600662231	13.8677368164063	14.1476211547852	13.6288223266602	13.9792556762695	13.9680767059326	13.8164176940918	13.554666519165	PPIG	A0A7I2V5Q5;A0A7I2V629;C9JM79;C9JN15;Q13427
15.0330114364624	14.9356908798218	14.9170999526978	15.0272989273071	14.9080753326416	14.9631538391113	14.9921751022339	15.2620372772217	14.935622215271	15.0536203384399	NEK9	A0A7I2V5R1;Q8TD19
18.388313293457	18.1276264190674	18.392427444458	18.1511573791504	18.2503547668457	18.0115966796875	18.1858062744141	18.196081161499	18.2637386322021	18.0386295318604	ACO2	A0A7I2V5T4;A2A274;Q99798
11.4154005050659	10.1305255889893	13.3369932174683	12.4315052032471	10.9608812332153	11.1589937210083	13.4185190200806	11.5193471908569	12.7604122161865	12.5678796768188	SLC4A2	A0A7I2V5T6;P04920
14.9939031600952	15.4091291427612	15.5613965988159	15.4077196121216	15.6850099563599	15.2935190200806	15.3737287521362	15.6604766845703	15.4515972137451	15.2776947021484	PTGES2	A0A7I2V5T7;Q9H7Z7
13.6649103164673	13.2696361541748	13.4701385498047	13.9714002609253	12.3008270263672	10.3333263397217	13.6277637481689	11.9439363479614	11.7810907363892	13.6780309677124	TJP1	A0A7I2V5U5;G5E9E7
12.5685024261475	12.9521598815918	12.3090867996216	13.1428709030151	13.4044799804688	12.8997974395752	12.858790397644	13.0356578826904	12.9507646560669	13.0219850540161	QPCTL	A0A7I2V5X1;Q9NXS2
19.7674655914307	19.4518013000488	19.5127944946289	19.5774211883545	19.5006065368652	19.5354557037354	19.3707580566406	19.4132289886475	19.3792095184326	19.2835388183594	NONO	A0A7I2V5Y7;Q15233
12.297553062439	12.6475963592529	12.6605291366577	13.0513534545898	10.6943845748901	12.028902053833	12.3022689819336	11.3226642608643	12.856671333313	13.0651750564575	USP40	A0A7I2YQ75;Q9NVE5
16.4592838287354	16.7873249053955	16.7923030853271	16.734977722168	17.0323867797852	16.6821365356445	16.8037796020508	16.5337181091309	17.0023555755615	16.931941986084	CSNK2B	A0A7I2YQ78;P67870;Q5SRQ6
16.4644622802734	16.3406276702881	16.2462139129639	16.2972030639648	16.26930809021	16.0207920074463	16.2088832855225	16.1244163513184	16.2791080474854	16.2113609313965	KPNA4	A0A7I2YQ95;H7C4F6;O00629
21.1228408813477	20.3003120422363	20.186149597168	20.5465908050537	19.9051151275635	20.2562732696533	20.1336803436279	19.6544532775879	19.8715400695801	19.9005432128906	NPM1	A0A7I2YQC0;P06748
17.3080234527588	17.3754978179932	17.2521686553955	17.3319396972656	17.3885631561279	17.4560165405273	17.254358291626	17.2980995178223	17.2355804443359	17.3903560638428	EIF3I	A0A7I2YQF8;A0A7I2YQU2;Q13347
19.318510055542	18.8825359344482	18.8620872497559	19.0573921203613	18.7481956481934	19.0401878356934	18.9116344451904	18.7340126037598	18.7851600646973	18.7972030639648	RPL19	A0A7I2YQG2;J3KTE4;J3QR09;P84098
14.8638668060303	14.8794565200806	14.6452083587646	14.9363489151001	14.9755401611328	14.9410810470581	14.8292331695557	14.8845348358154	14.856559753418	14.9464826583862	GMPPB	A0A7I2YQI5;Q9Y5P6
19.2883243560791	19.3586959838867	19.3051319122314	19.2539844512939	19.4666118621826	19.2552700042725	19.1066493988037	19.1273880004883	19.3027420043945	19.0865516662598	GGH	A0A7I2YQQ3;Q92820
13.0507507324219	11.9587068557739	13.3029403686523	13.2736692428589	12.9625186920166	12.4206104278564	13.2689714431763	13.0380296707153	12.687671661377	12.6084728240967	NSD2	A0A7I2YQS5;A0A7P0P278;O96028
13.3533906936646	12.9357328414917	13.1184034347534	13.1704540252686	13.0838489532471	13.1292057037354	12.9780387878418	13.1048488616943	12.9931192398071	13.0455732345581	WASH6P	A0A7I2YQU6;Q9NQA3
16.944299697876	16.8618259429932	17.111083984375	17.0407791137695	16.9531002044678	16.8654346466064	16.9072494506836	16.944730758667	16.9232006072998	16.7363834381104	PRPF40A	A0A7N4I394;O75400
13.8428564071655	13.4347839355469	13.7399082183838	13.7060422897339	13.4203968048096	13.1643562316895	13.8411540985107	13.0984878540039	13.3332862854004	13.4224901199341	TENT4B	A0A7N4YH79
15.5246925354004	15.1283760070801	15.4051933288574	15.3302402496338	15.3064241409302	15.0557298660278	15.2525548934937	15.2799310684204	15.201904296875	15.02952003479	MRPS22	A0A7P0MKV3;G5E9W7;P82650
15.506688117981	14.7858829498291	13.7872123718262	14.453164100647	14.3697242736816	14.4863262176514	13.7924346923828	14.36501121521	14.1668224334717	14.6084089279175	PRSS3	A0A7P0MNE9;P35030
14.2637643814087	14.7135877609253	13.9928464889526	14.1173763275146	13.9640874862671	14.5781288146973	13.6174898147583	14.1292171478271	14.0226993560791	14.1992702484131	PLCB4	A0A7P0MRI8
15.0641117095947	15.1033897399902	15.1339912414551	15.1149463653564	14.8695030212402	14.9607219696045	15.2128086090088	15.3028688430786	15.143424987793	15.2466077804565	OAS3	A0A7P0T7V2;A0A7P0T8S7;A0A7P0T9J0;A0A7P0T9W6;A0A7P0TAC0;A0A7P0TAC8;A0A7P0TAS0;A0A7P0TAU8;A0A7P0TB73;A0A7P0Z4D0;A0A7P0Z4F1;A0A7P0Z4F5;Q9Y6K5
11.7047176361084	12.5431795120239	12.6196279525757	12.9858856201172	12.4706602096558	12.5636262893677	12.4042062759399	12.6939315795898	12.4401826858521	12.8682355880737	ARFGEF2	A0A7P0T7Z2;A0A7P0TA34;Q9Y6D5
14.5853910446167	14.5265913009644	14.6049928665161	14.7842140197754	14.7129983901978	14.5890941619873	14.7897758483887	14.7279577255249	14.5046463012695	14.5749816894531	VRK1	A0A7P0T824;A0A7P0T838;A0A7P0T952;A0A7P0T9E5;A0A7P0T9T1;A0A7P0TA16;A0A7P0TA65;A0A7P0TB15;A0A7P0TBE4;H0YJF7;Q99986
14.8836870193481	14.600757598877	14.9723501205444	14.8202333450317	14.810622215271	14.4741840362549	14.7979602813721	14.6948699951172	14.6852254867554	14.3818550109863	ALG5	A0A7P0T850;A0A7P0T901;A0A7P0T9B8;A0A7P0T9X2;A0A7P0TAL2;A0A7P0TB27;A0A7P0Z4I2;B4DR67;Q9Y673
19.4414405822754	19.844669342041	19.7840919494629	19.8095932006836	20.0670032501221	19.8248920440674	19.6144580841064	19.7642364501953	19.8872585296631	19.9263000488281	CALR	A0A7P0T861;K7EL50;P27797
14.1132364273071	13.7875299453735	14.0081081390381	14.1684036254883	13.9288930892944	14.0229396820068	13.9497489929199	13.8320875167847	13.9229898452759	13.9448556900024	AATF	A0A7P0T868;Q9NY61
13.8470249176025	13.5812530517578	13.6694927215576	13.8005228042603	13.6313629150391	13.5491676330566	13.7542142868042	13.6129465103149	13.6784582138062	13.3518953323364	C1orf174	A0A7P0T887;A0A7P0T8I3;A0A7P0T8M5;A0A7P0TAC3;A0A7P0TAV4;Q8IYL3
15.8544988632202	15.9377307891846	16.1199932098389	16.1075649261475	16.035436630249	15.9775409698486	16.133975982666	15.9394454956055	16.1010284423828	16.0199069976807	DST	A0A7P0T890;Q03001
14.2891216278076	14.2469682693481	14.5293216705322	14.2662048339844	14.3028774261475	14.2013931274414	14.415186882019	13.9471702575684	14.3080339431763	13.8902034759521	AKAP8	A0A7P0T893;O43823
16.6378402709961	16.8830299377441	16.7329998016357	16.8165912628174	16.6737537384033	16.7631568908691	16.7435817718506	16.857479095459	16.7173252105713	16.8004035949707	SNX9	A0A7P0T8C7;A0A7P0T8D4;A0A7P0T8S8;A0A7P0T8Z2;A0A7P0T8Z7;A0A7P0Z4A2;A0A7P0Z4A5;Q9Y5X1
11.7858085632324	10.7437429428101	10.4521818161011	9.57120227813721	10.3137664794922	7.40299081802368	10.2872037887573	10.3406085968018	10.2570466995239	10.1934404373169	DTNA;DTNA;DTNA;DTNA;DTNA;DTNA;DTNA;DTNB;DTNB;DTNA;DTNA;DTNA;DTNB;DTNA	A0A7P0T8G2;A0A7P0T8J4;A0A7P0T8Y5;A0A7P0T9L1;A0A7P0TBG1;A0A7P0TBH9;A0A7P0Z4D7;E7EVB6;E9PEY4;K7ERH7;M0QZ28;M0R021;O60941;Q9Y4J8
18.8116836547852	17.9260597229004	17.9146308898926	17.935962677002	17.9209232330322	17.86181640625	17.6489009857178	17.8177585601807	17.8244438171387	17.5813064575195	CTSZ	A0A7P0T8I6;Q9UBR2
14.7975091934204	15.4433794021606	15.103928565979	15.4507846832275	15.3301315307617	15.48326587677	15.3368940353394	15.6515998840332	15.3773956298828	15.4499835968018	AAR2	A0A7P0T8J7;A0A7P0TA70;A2A2Q9;Q9Y312
15.8013505935669	15.7218914031982	15.9170722961426	15.7820682525635	15.7107563018799	15.7269868850708	15.8471345901489	15.6276264190674	15.7908687591553	15.5543079376221	TCERG1	A0A7P0T8N8;O14776
14.9531936645508	13.8741226196289	14.133825302124	14.1087703704834	13.8695840835571	13.8613338470459	13.9166297912598	14.2174158096313	14.5571117401123	14.2273502349854	PAX8	A0A7P0T907;Q06710
14.3997755050659	14.4152593612671	14.6834802627563	14.5130071640015	14.1025905609131	14.3518114089966	14.7896413803101	14.7179412841797	14.3022985458374	14.1989974975586	SIRT5	A0A7P0T915;Q9NXA8
13.5538787841797	11.4236717224121	11.9887619018555	12.947772026062	12.7323913574219	10.5575761795044	12.8850860595703	12.1758060455322	11.1943550109863	11.4048738479614	RBPJ	A0A7P0T947;A0A7P0T9Y9;A0A7P0TBJ4;A0A7P0Z4N7;D6RF98;Q06330
13.8327007293701	12.8945665359497	13.3546333312988	13.7619380950928	13.2892074584961	13.8855609893799	13.4972286224365	13.638897895813	13.4367094039917	13.1295347213745	VPS53	A0A7P0T9B2;A0A7P0TA53;A0A7P0TAE0;A0A7P0TBK3;A0A7P0Z400;Q5VIR6
14.6390466690063	14.4984531402588	14.6454477310181	14.4839973449707	14.6186227798462	14.3487520217896	14.3029775619507	14.5111570358276	14.6318969726563	14.3498239517212	CRAT	A0A7P0T9E7;A0A7P0T9R9;A0A7P0TAR1;P43155
12.500394821167	13.1762571334839	13.5437726974487	12.7359008789063	12.3961868286133	12.8244686126709	13.2947969436646	13.1288957595825	12.7459840774536	12.8414916992188	MTR	A0A7P0T9G7;A0A7P0TAJ0;A0A7P0TAV2;Q99707
15.120041847229	14.7079572677612	14.4514627456665	14.8746738433838	14.9070997238159	14.8296661376953	10.3101673126221	15.3195056915283	14.7504606246948	13.6348495483398	MBNL2	A0A7P0T9I3;O95205;Q5VZF2
16.5982933044434	16.8204231262207	16.6588191986084	16.6744937896729	16.8071060180664	16.8105754852295	16.7922954559326	17.0654773712158	16.8181304931641	17.0086269378662	NAMPT	A0A7P0T9I9;P43490
12.7544393539429	12.9780082702637	12.6160888671875	12.5696430206299	13.1899299621582	15.0395011901855	12.6124486923218	13.4453229904175	12.7273855209351	13.0219306945801	SMPD4	A0A7P0T9J6;A0A7P0TB24;A0A7P0TB44;H7C0W5;H7C1Q6;Q9NXE4
13.6246242523193	13.570556640625	13.8342571258545	13.6412982940674	13.9238786697388	13.8821334838867	13.6428461074829	13.8876323699951	13.7557048797607	13.9171772003174	DDX20	A0A7P0T9T8;Q9UHI6
13.8692016601563	14.450023651123	14.5382919311523	14.2312965393066	14.8946208953857	14.5699319839478	14.1773471832275	14.366756439209	14.2066669464111	14.2304944992065	SIGMAR1	A0A7P0TA12;B4DR71;Q99720
14.026873588562	13.4352827072144	13.6573734283447	13.6862831115723	13.2535705566406	13.6268243789673	13.5257453918457	13.389235496521	13.5496683120728	13.3108339309692	PPIL2	A0A7P0TA15;A0A7P0TAH4;A0A7P0TB19;A0A7P0Z4K4;Q13356
19.6129703521729	19.7461814880371	19.8248958587646	19.69850730896	19.9922122955322	19.756628036499	19.7748775482178	19.9007453918457	19.9091873168945	19.8259983062744	P4HB	A0A7P0TA71;A0A7P0TB26;P07237
17.9261798858643	17.9135456085205	18.156759262085	17.9949626922607	18.1571483612061	17.9164886474609	17.9229526519775	18.0081768035889	18.0588302612305	17.8278846740723	ACSL3	A0A7P0TA76;O95573
12.721399307251	13.642032623291	13.4866743087769	13.3150272369385	13.395281791687	13.5588960647583	13.5951557159424	13.8640480041504	13.6976881027222	13.597074508667	HTT	A0A7P0TA78;A0A7P0TAC5;P42858
18.9714298248291	19.1383399963379	19.3328914642334	19.101936340332	19.5591697692871	19.0250091552734	19.2246189117432	19.5387401580811	19.3018360137939	19.1895790100098	BSG	A0A7P0TA85;P35613
21.098575592041	20.9568367004395	20.911190032959	20.9629745483398	20.9805164337158	20.9149398803711	20.7107009887695	20.7840480804443	20.8884658813477	20.8533592224121	HSP90B1	A0A7P0TAE1;A0A7P0TAT8;H0YIV0;P14625
14.5559787750244	13.5843410491943	14.0242605209351	13.8840951919556	13.4161024093628	13.402247428894	13.6697616577148	13.0329399108887	13.6864013671875	13.7943964004517	AKAP8L	A0A7P0TAE3;Q9ULX6
19.1629428863525	18.9625377655029	19.0190925598145	18.992073059082	18.7954940795898	18.8149147033691	18.7869930267334	18.6644115447998	18.8544254302979	18.7624187469482	CANX	A0A7P0TAE9;A0A7P0TB65;P27824
16.3900699615479	16.7323188781738	16.8026790618896	16.6021213531494	17.1258945465088	16.7724494934082	16.6623497009277	16.8887805938721	16.8450832366943	16.781078338623	DDB1	A0A7P0TAK7;Q16531
20.1093597412109	20.2854042053223	20.2283058166504	20.3518924713135	20.0812206268311	20.1373672485352	19.9110374450684	20.1482772827148	20.0804290771484	20.0786228179932	SLC3A2	A0A7P0TAN7;A0A7P0Z4A0;A0A7P0Z4P5;F5GZS6;J3KPF3;P08195
13.5047416687012	14.30100440979	11.027663230896	9.87577629089355	14.1102514266968	13.3010473251343	10.7077560424805	14.5130414962769	10.6688871383667	13.7614345550537	USP13	A0A7P0TAP9;A0A7P0TB69;H7C5J3;Q92995
15.404878616333	15.2382488250732	15.2644948959351	15.3991870880127	15.1140785217285	15.131422996521	15.1842679977417	14.8163967132568	15.2526874542236	15.0436944961548	DNAJC10	A0A7P0TAQ9;Q8IXB1
19.933837890625	19.8975143432617	19.7079467773438	19.789041519165	19.8118305206299	19.8259124755859	19.7358932495117	19.64231300354	19.8100070953369	19.8130378723145	VCP	A0A7P0TAW3;P55072
16.0295791625977	15.8144598007202	16.1803779602051	15.994044303894	15.9952354431152	15.7429523468018	15.97878074646	15.9727849960327	15.9896965026855	15.9259462356567	DLAT	A0A7P0TAX2;P10515
15.3192739486694	16.3239440917969	13.9266729354858	16.3775882720947	15.7098436355591	16.2097454071045	14.5955276489258	15.4450712203979	15.5448665618896	16.3881778717041	;DDX58;DDX58;DDX58	A0A7P0TB70;A2A376;B3KWW1;O95786
13.6348152160645	13.6616373062134	13.2803821563721	13.2077541351318	13.0801649093628	12.449089050293	12.7898368835449	13.0582208633423	13.2005443572998	13.0560646057129	IFIT5	A0A7P0TBP9;Q13325
13.6283855438232	14.1179151535034	14.3692197799683	13.9113445281982	14.3161497116089	13.7622356414795	14.1035461425781	14.0663003921509	14.3787622451782	14.145658493042	DBT	A0A7P0Z494;P11182
19.4254684448242	19.5337867736816	19.5826950073242	19.5563545227051	19.717227935791	19.5179271697998	19.4030227661133	19.4815216064453	19.5728359222412	19.5080966949463	PPIB	A0A7P0Z497;P23284
15.700270652771	15.7429838180542	15.7511367797852	15.6618337631226	15.860520362854	15.8228244781494	15.8123893737793	15.8898229598999	15.7932786941528	15.8146867752075	DCTN1	A0A7P0Z4C3;E7EX90
17.4453792572021	17.1135692596436	17.2209339141846	17.1107120513916	17.0884799957275	16.9516944885254	17.095630645752	16.9396018981934	17.1251487731934	16.9838981628418	ADAR	A0A7P0Z4F9;P55265
13.7576627731323	13.8989458084106	13.7617015838623	13.6470575332642	13.9283151626587	14.0201549530029	13.8529281616211	13.3432836532593	13.6704597473145	13.8285446166992	MICALL1	A0A7P0Z4L3;B0QY86;B0QY91;H0Y6J8;Q8N3F8
13.9690465927124	13.5026588439941	13.8283424377441	13.7649993896484	13.8160161972046	13.5088109970093	13.7484579086304	13.6628942489624	13.8970909118652	13.6268768310547	RBM47	A0AV96;D6R9D6;D6RBS9
16.4917278289795	16.9930362701416	16.8112449645996	16.9731998443604	17.0301742553711	16.9965934753418	17.0802001953125	16.9618587493896	16.9653739929199	17.1509971618652	UBA6	A0AVT1
11.5341186523438	12.0016822814941	11.4967050552368	11.331184387207	12.3341121673584	12.1004505157471	11.7931842803955	11.8984117507935	11.9258613586426	12.4187831878662	UHRF1BP1L	A0JNW5
16.0188999176025	15.9557819366455	15.7701148986816	15.9411554336548	15.6396560668945	15.8396663665771	16.0023307800293	15.9114208221436	15.8270034790039	16.003589630127	SHTN1	A0MZ66
15.1109390258789	14.6623382568359	14.6602325439453	14.9665718078613	14.7693223953247	14.7957048416138	14.1090450286865	14.404408454895	14.6257247924805	14.5519905090332	TMEM223	A0PJW6
13.7400312423706	13.9903144836426	14.2337894439697	13.9193601608276	14.2403602600098	13.7804470062256	14.1562747955322	14.2166624069214	14.0182666778564	13.79319190979	ILVBL	A1L0T0
13.3720970153809	13.9770250320435	13.7679929733276	13.8918313980103	13.6178541183472	13.6751298904419	13.9624004364014	14.1728115081787	13.8003244400024	13.9960174560547	SH3PXD2B	A1X283
14.8321752548218	14.1693210601807	14.5128593444824	14.3656921386719	14.1584796905518	13.9292058944702	14.3510713577271	14.3694524765015	14.1232118606567	13.5211515426636	SYNGR1	A2A283;B5MCD7;F8WCE4;O43759
11.7950162887573	13.1114845275879	12.824764251709	12.8629446029663	12.8888311386108	13.129373550415	12.5433921813965	12.7454633712769	12.6984958648682	12.7028226852417	RALGAPB	A2A2F0;Q86X10
15.8257122039795	16.1317882537842	16.3130435943604	16.2901592254639	16.1950969696045	16.0481224060059	16.2492218017578	16.5697593688965	16.2819061279297	16.35133934021	PSMB9	A2ACR1;P28065
15.534740447998	15.3903226852417	15.4117374420166	15.4527587890625	15.4280099868774	15.4965400695801	15.3604412078857	15.4814653396606	15.4318618774414	15.2206153869629	MPG	A2IDA3;P29372
12.0270404815674	12.2132234573364	12.2862930297852	12.1156044006348	12.2669897079468	11.8965034484863	11.9074354171753	12.3618364334106	12.0288648605347	11.8971099853516	NBAS	A2RRP1
13.1467933654785	12.4525117874146	12.5403423309326	12.1903238296509	12.4589653015137	12.8783712387085	12.3730297088623	12.7439785003662	12.4856519699097	12.8106832504272	CCDC66	A2RUB6;C9JYB8;F8WDJ0
14.1497526168823	13.5806121826172	14.0746183395386	13.6114234924316	13.2163057327271	13.366662979126	13.8378286361694	12.2369146347046	13.1174182891846	13.0003299713135	VWA8	A3KMH1
13.0199956893921	13.023136138916	13.2287731170654	13.1909780502319	13.043345451355	13.2246799468994	13.4292192459106	13.0661401748657	13.1192169189453	12.883957862854	SBNO1	A3KN83
12.5066661834717	11.8841466903687	12.0993194580078	12.8625202178955	12.3814373016357	11.7809448242188	12.5718336105347	11.864089012146	12.2979679107666	11.9167242050171	GTPBP10	A4D1E9;C9J8R7;C9JNI1
13.737250328064	13.8547220230103	14.3052434921265	14.4094324111938	13.6364297866821	13.851432800293	13.9950466156006	13.8885631561279	13.5589122772217	13.9511585235596	VPS37C	A5D8V6;F5H4Q5
16.0182991027832	16.0460243225098	15.9979820251465	15.9665327072144	16.0149784088135	15.8575763702393	15.9539728164673	16.0484027862549	16.0162925720215	15.9591426849365	CNOT1	A5YKK6
14.4548616409302	14.4086427688599	14.3353910446167	14.5019311904907	14.7979316711426	14.7828092575073	14.4637689590454	14.7475051879883	14.5862636566162	14.7096328735352	MAP1LC3B2;MAP1LC3B;MAP1LC3B	A6NCE7;H3BTL1;Q9GZQ8
11.3782844543457	14.8209638595581	14.661994934082	14.5461130142212	14.6149711608887	11.8847885131836	11.4511785507202	14.6666612625122	14.8149871826172	15.1810970306396	IQCA1L	A6NCM1
15.1044044494629	15.1100387573242	14.8349895477295	15.010404586792	14.8980207443237	15.1445178985596	15.2085704803467	14.8174076080322	14.9973106384277	15.0994577407837	PGP	A6NDG6
14.0011301040649	14.0994291305542	13.9811573028564	14.0561571121216	13.8730249404907	14.00696849823	14.0818672180176	13.7648286819458	14.1177368164063	14.2324171066284	RCCD1	A6NED2;G3V2I3
11.1130847930908	10.8681011199951	11.866548538208	10.8758020401001	12.324803352356	10.8130493164063	12.121994972229	11.4533348083496	11.2691268920898	11.0687313079834	HMGN1	A6NEL0;A6NL93;P05114
17.2300624847412	16.9464988708496	17.0473175048828	16.9794254302979	16.9116344451904	16.9120826721191	17.0048122406006	17.0875930786133	16.9159679412842	16.8940143585205	HCFC1	A6NEM2
12.7574872970581	14.2316017150879	14.5725202560425	14.1112585067749	15.137038230896	14.2905426025391	14.2406673431396	14.4081373214722	14.657922744751	14.2303552627563	TSPAN14	A6NEP9;Q8NG11
13.7799367904663	14.107367515564	13.9287223815918	14.1904678344727	13.5815830230713	14.0852184295654	14.3187484741211	14.2161092758179	13.8833675384521	13.2748680114746	POLR2J2;POLR2J3;POLR2J	A6NFM0;E2QRJ6;F6S314
15.7913684844971	16.337589263916	16.0962333679199	16.0660991668701	16.3876132965088	16.2434482574463	16.1119689941406	16.6598129272461	16.2400188446045	16.403491973877	NUDT5	A6NFX8;Q9UKK9
10.9612159729004	13.6966648101807	13.6498165130615	13.7682828903198	13.7781229019165	13.9691133499146	13.8064384460449	14.1674365997314	13.7220830917358	14.124439239502	WBP2	A6NG10;K7EMC9;Q969T9
15.0134677886963	15.060772895813	14.7275714874268	15.098424911499	15.4501514434814	15.0198431015015	13.6655006408691	15.430006980896	15.1995706558228	15.1908473968506	YIF1A	A6NGW1;O95070
16.0419445037842	15.8697137832642	15.7652673721313	15.8237495422363	15.8552951812744	15.7577333450317	15.8999700546265	15.6745109558105	15.6995229721069	15.1829519271851	ZMYM3	A6NHB5;A6NHN7;Q14202
15.3843622207642	15.4068470001221	15.4149522781372	15.3729486465454	15.2801723480225	15.2396898269653	15.3317337036133	15.3517322540283	15.3232698440552	15.2782335281372	SMCHD1	A6NHR9
14.2523221969604	14.5168027877808	14.4184741973877	14.61439037323	14.6543025970459	14.591609954834	14.6166610717773	14.6158142089844	14.701060295105	14.7466201782227	UNC119B	A6NIH7
13.4145460128784	9.27020168304443	13.1171913146973	13.0671758651733	12.5186710357666	13.0641117095947	13.0765914916992	12.3588762283325	12.7969598770142	12.4295244216919	METTL15	A6NJ78
15.5487613677979	16.185115814209	15.9657106399536	15.8861274719238	16.0155830383301	16.0540466308594	16.2278347015381	16.3087139129639	16.1532306671143	16.3274745941162	RNPEP	A6NKB8;Q9H4A4
13.8287553787231	13.7123432159424	13.8718090057373	13.3550548553467	13.3977031707764	13.5796728134155	13.6379537582397	13.5027256011963	13.704719543457	13.5048608779907	CCDC85C	A6NKD9
15.211555480957	15.8268337249756	16.0004787445068	15.7173357009888	16.207857131958	15.789493560791	15.7986307144165	16.3735370635986	15.8217000961304	15.7967576980591	CNIH4	A6NLH6;Q9P003
17.9986171722412	17.4549560546875	17.1549701690674	17.314474105835	17.2311668395996	17.315580368042	16.6596984863281	17.143705368042	16.955846786499	17.0581970214844	CD81	A6NMH8;E9PIF1;E9PJK1;E9PM31;E9PRJ8;H0YDJ9;H0YDL9;H0YEE2;P60033
12.1727333068848	13.7155418395996	13.2603340148926	12.4325304031372	12.47487449646	12.4133110046387	13.2209167480469	12.6399307250977	13.203727722168	12.5775527954102	DIAPH2	A6NML8;C9J6U3;K4DI95;O60879
19.1382331848145	19.1206951141357	18.482027053833	19.014669418335	18.211051940918	18.5668544769287	18.8405818939209	18.7635650634766	18.7642822265625	18.5866298675537	POLA1	A6NMQ1;P09884
13.3476438522339	12.914119720459	12.916166305542	13.0813236236572	12.9594478607178	13.0716457366943	13.0608882904053	12.5980930328369	12.4616680145264	12.8941402435303	SHROOM1	A6NN40;Q2M3G4
17.7595825195313	17.1561546325684	17.1976833343506	17.2587184906006	16.9990348815918	17.0558853149414	17.0699901580811	17.2521686553955	17.074878692627	17.0496120452881	PRAF2	A6NP52;O60831
16.0756931304932	16.2524337768555	16.1032829284668	16.0871543884277	16.3552856445313	16.4120540618896	16.1071720123291	16.5496978759766	16.1963958740234	16.4807643890381	PTPA	A6PVN5;Q15257
13.1890687942505	11.4343090057373	11.6442022323608	11.9171285629272	12.5338525772095	13.0119256973267	12.5884780883789	13.363697052002	12.9313325881958	12.848370552063	MED20	A6PVP4;B7ZBQ1;B7ZBQ3;Q9H944
14.9752798080444	14.70654296875	14.8215961456299	14.7847366333008	14.6201992034912	14.8005628585815	14.4647703170776	14.2845420837402	14.5829257965088	14.3466844558716	PIP5K1A	A6PW57;Q99755
14.5467300415039	14.8050184249878	14.729531288147	14.7281522750854	15.046462059021	14.8704195022583	14.6293573379517	14.8782348632813	14.6642456054688	14.7443361282349	RTL8C	A6ZKI3
16.8894786834717	16.790979385376	16.6222229003906	16.6697120666504	17.0154991149902	16.9409923553467	16.5379219055176	16.853759765625	16.6400318145752	16.588207244873	TPM2	A7XZE4
14.4297571182251	14.5850048065186	14.8175659179688	14.0245132446289	14.3756198883057	14.2146244049072	14.6345777511597	14.1292934417725	14.6913261413574	14.444224357605	POM121C;POM121C;POM121	A8CG34;C9JFL1;Q96HA1
13.8563671112061	13.9217987060547	14.2932567596436	14.2529315948486	14.1295337677002	14.3094472885132	14.1736059188843	14.2575187683105	14.2294759750366	14.2602519989014	ITSN1	A8CTZ0;F8W7U0;Q15811
15.1982183456421	15.9162111282349	15.6165065765381	15.6897354125977	15.4911603927612	15.761679649353	15.5851964950562	13.5722570419312	15.4446153640747	15.1864967346191	HSPA8	A8K7Q2
13.8441972732544	13.0677108764648	13.6068248748779	13.4538488388062	13.0406475067139	13.3300971984863	13.0797824859619	12.4808788299561	13.1260814666748	13.4177322387695	AFDN	A8MQ02
13.6231622695923	13.6964378356934	13.8235492706299	13.0760307312012	13.8172874450684	13.3821640014648	13.6904449462891	14.5344877243042	13.8136253356934	13.9565668106079	FMR1	A8MQB8;G3V0J0
14.4199533462524	14.7593078613281	14.0037813186646	14.2893896102905	14.8206624984741	14.70081615448	13.9256134033203	14.6304206848145	13.9758958816528	14.1123847961426	VPS26C	A8MTY9;O14972
18.8921165466309	18.9410438537598	19.0136947631836	18.8500175476074	19.254430770874	19.0491390228271	19.3906803131104	19.3622417449951	19.1775321960449	19.1185245513916	SUMO3	A8MU27;A8MUA9;P55854
18.601203918457	18.6194953918457	18.7243499755859	18.6038360595703	18.8812923431396	18.7840404510498	18.6842346191406	18.7694892883301	18.7732048034668	18.7072811126709	RPL23A	A8MUS3;H7BY10;K7ERT8;P62750
19.4192123413086	19.0917072296143	19.027099609375	18.9963817596436	19.6162643432617	18.9288158416748	18.724666595459	19.1476001739502	19.0406875610352	18.9277000427246	SNRPGP15;SNRPG;SNRPG;SNRPG	A8MWD9;F5H013;P62308;Q49AN9
13.5072574615479	13.5155429840088	13.6528635025024	13.5638961791992	13.6563062667847	14.2698860168457	13.4129152297974	14.2236948013306	13.7315969467163	13.6559276580811	ERCC2	A8MX75;P18074
15.0946569442749	15.6821308135986	15.3573303222656	15.2368183135986	15.4375581741333	15.3380889892578	15.4605989456177	15.6074829101563	15.4941110610962	15.7172212600708	RABL2B;RABL2A;RABL2A;RABL2B	A8MXF6;B7ZBD5;Q9UBK7;Q9UNT1
13.0148038864136	11.5875072479248	11.24254322052	13.3220205307007	13.1830997467041	10.7042255401611	11.7991991043091	12.6728782653809	12.3393678665161	11.2482805252075	REEP6	A8MXN1;Q96HR9
15.7231874465942	15.4184255599976	15.427604675293	15.564492225647	15.1961803436279	15.3298902511597	15.1153879165649	14.138331413269	15.2415571212769	15.1922721862793	PTTG1IP	A8MXQ1;P53801
0.396813929080963	12.0334959030151	10.2304039001465	10.6287174224854	12.5925703048706	12.431830406189	12.7561311721802	13.2304096221924	12.8299531936646	12.7603416442871	GTF2A2	A8MYR4;H0YK39;P52657
14.7684020996094	14.5265369415283	14.3423271179199	14.6784524917603	14.1648292541504	14.4942655563354	14.744291305542	14.2881660461426	14.3747596740723	14.3538885116577	NAA20	A8MZB2;P61599
13.9731702804565	14.1532602310181	14.8321943283081	14.0690727233887	14.4203367233276	14.4284563064575	14.7336282730103	14.4396057128906	14.4607334136963	13.9191083908081	SRRM1	A9Z1X7;E9PCT1;Q8IYB3
19.7190017700195	19.1575622558594	19.0468921661377	19.3415298461914	19.3320217132568	19.194149017334	18.7640247344971	18.9433898925781	18.7182731628418	18.898645401001		ALBU_BOVIN
19.6414184570313	19.8127613067627	19.3389549255371	19.5537033081055	19.7443161010742	19.8740367889404	19.7376232147217	19.8114738464355	19.5777626037598	19.8704261779785	;ANXA5	ANXA5_HUMAN;P08758
13.243462562561	12.7358522415161	11.6347522735596	12.5677089691162	13.2258205413818	13.0419893264771	13.2333679199219	13.3203811645508	12.8015670776367	13.5988540649414	KIAA0930	B0QY16;Q6ICG6
11.4435834884644	12.3315887451172	11.9665327072144	12.4860858917236	12.0724859237671	12.4629974365234	12.1904201507568	10.4182348251343	12.237889289856	11.9105186462402	FAM118A	B0QY28;B0QY29;Q9NWS6
15.7151956558228	16.6014232635498	16.4935894012451	16.3742275238037	16.9999313354492	16.6432037353516	16.47021484375	16.8558902740479	16.7103157043457	16.6347942352295	EIF3L	B0QY89;Q9Y262
17.6081962585449	17.4447174072266	17.5209331512451	17.4514789581299	17.5004615783691	17.4597568511963	17.5274085998535	17.4353504180908	17.598014831543	17.3924102783203	EWSR1	B0QYK0;Q01844
17.9353084564209	18.0075531005859	17.8446731567383	17.9724617004395	17.8648777008057	18.0769481658936	17.9504547119141	18.0301990509033	17.9088249206543	18.090576171875	UBE2I;UBE2I;UBE2I;UBE2I;	B0QYN7;H3BPC4;H3BQQ9;P63279;UBE2I_HUMAN
17.2970371246338	17.4272136688232	17.2777061462402	17.2272186279297	17.352653503418	17.3351612091064	17.5090751647949	17.5682640075684	17.3502674102783	17.519718170166	CPNE1	B0QZ18;Q99829
11.5090093612671	12.8134517669678	12.043381690979	12.2501173019409	11.6679258346558	11.7298974990845	12.4719247817993	11.945987701416	12.0133781433105	12.6470155715942	COMMD6	B0QZ40;Q7Z4G1
0.0125408284366131	11.9974012374878	11.1475124359131	12.492115020752	10.8096647262573	12.6710329055786	11.9252872467041	11.8693799972534	10.1016750335693	11.9464101791382	APOC3	B0YIW2;P02656
16.2691135406494	16.8181171417236	16.725399017334	16.6072998046875	17.0821094512939	16.7894096374512	16.7982501983643	17.0691089630127	16.8881587982178	16.8778324127197	ARCN1	B0YIW6;P48444
13.7984781265259	13.3536376953125	12.7498903274536	13.4321575164795	12.976354598999	13.5804719924927	13.3083400726318	12.481822013855	13.0906991958618	13.2361469268799	ASCC2	B1AH59;Q9H1I8
12.2069187164307	13.1361970901489	14.3051166534424	11.9912281036377	13.7347116470337	13.2735404968262	14.7579669952393	14.4592227935791	13.1205387115479	12.6845026016235	RAC2	B1AH77;B1AH80;P15153
16.25852394104	16.4339008331299	15.5879058837891	16.4687557220459	16.7374401092529	16.422290802002	15.1104373931885	14.9537305831909	14.8756818771362	14.0436773300171	TSPO	B1AH87;P30536
14.0675554275513	13.9110641479492	14.2076616287231	13.9522275924683	13.7462577819824	13.4566946029663	13.9720239639282	14.0936136245728	13.9645776748657	13.7461538314819	STX12	B1AJQ6;Q86Y82
15.4994659423828	15.6649360656738	15.3710622787476	15.5860986709595	15.1436853408813	15.7785034179688	15.7489576339722	15.3097429275513	15.4775133132935	15.5722684860229	PSMD10	B1AJY5;B1AJY7;O75832
18.6486434936523	18.8108882904053	18.7060718536377	18.7202968597412	18.7916202545166	18.700475692749	18.7486801147461	18.7824764251709	18.7080974578857	18.839786529541	CAPZB	B1AK88
16.5200519561768	16.08083152771	16.2113990783691	16.3991622924805	15.997950553894	16.3429985046387	16.1955547332764	16.6504039764404	16.1654014587402	16.1122455596924	EPHB2	B1AKC9;P29323
11.5721130371094	12.958625793457	13.0689086914063	12.3463726043701	13.84739112854	12.4812965393066	12.3442058563232	11.9728708267212	13.3311977386475	13.114649772644	PISD	B1AKM6;B1AKM8;H0Y7P7;Q9UG56
18.8118324279785	18.0851020812988	18.2226448059082	18.1800880432129	18.1480827331543	18.0294532775879	17.9961814880371	18.2505779266357	17.9796371459961	17.9810466766357	GNB1	B1AKQ8;F6UT28;F6X3N5;P62873
10.4505853652954	11.9968338012695	12.81907081604	12.6997413635254	12.8395023345947	12.5895795822144	12.4525260925293	12.5998420715332	12.7054805755615	12.8092784881592	UQCC1	B1AKV3;B1AKV6;F6UTR7;Q9NVA1
15.7938365936279	15.5503664016724	15.8944244384766	15.7561655044556	15.4288806915283	15.3704137802124	15.6624841690063	15.3630151748657	15.6120691299438	15.3450355529785	MRPL43	B1AL05;H0Y6Y8;Q8N983
14.5807991027832	15.5754365921021	15.2511930465698	15.3279056549072	15.5724906921387	15.5833101272583	15.4626131057739	15.2861156463623	15.4250421524048	15.5165853500366	PRPS1	B1ALA9;P60891
10.982310295105	11.9290142059326	10.3559312820435	12.1002521514893	11.4546661376953	11.9474172592163	11.9805974960327	11.7791929244995	11.5594835281372	12.0635862350464	SMG7	B1ALB4;E9PD50;Q92540
16.1733474731445	15.3407773971558	15.5771293640137	15.6187372207642	15.2158870697021	15.373649597168	15.128321647644	15.1842613220215	15.3451557159424	15.2632827758789	TMEM9	B1ALM5;Q9P0T7
14.2286720275879	13.9425477981567	13.9379854202271	13.7104520797729	13.9106769561768	13.9270248413086	14.1643095016479	13.7522068023682	13.6415252685547	13.8768100738525	SEPTIN6	B1AMS2;Q14141
10.7795610427856	10.1201057434082	12.3147764205933	11.2772407531738	12.5791921615601	11.6428556442261	12.3930206298828	10.8547248840332	12.2441778182983	11.8285226821899	CD58	B1AMW1;H0YDI1;P19256
13.5165500640869	13.8514776229858	13.8685836791992	13.8115186691284	13.8337850570679	13.4758634567261	13.628698348999	13.7080488204956	13.5465021133423	13.4560785293579	NMNAT1	B1AN62;Q9HAN9
12.8919639587402	12.6518859863281	12.6674270629883	12.9815454483032	12.7350311279297	12.2640609741211	12.9712076187134	12.6598453521729	12.7385940551758	12.5273084640503	EXOC6	B1AP46;E7EW84;Q8TAG9
13.0247068405151	13.409140586853	13.4997644424438	13.4582357406616	13.1544418334961	12.9212112426758	13.6731281280518	13.5523996353149	13.4769773483276	13.5078563690186	EPS15	B1AUU8;P42566
16.8846778869629	15.8709812164307	16.0428199768066	16.0666561126709	15.9560804367065	15.708119392395	15.1887197494507	15.9492559432983	15.5099582672119	15.7986307144165	;B2M	B2MG_HUMAN;P61769
21.036865234375	20.8925075531006	21.0263786315918	20.9803428649902	21.0048599243164	20.8951625823975	20.7601509094238	20.8188095092773	20.9245204925537	20.8006267547607	HNRNPC	B2R5W2;B4DY08;G3V4W0
15.1989240646362	14.9425849914551	14.9078016281128	15.1496295928955	15.1392707824707	15.1086864471436	14.9806957244873	14.8517055511475	14.929425239563	14.8414936065674	JMJD6	B2WTI3;B2WTI4;K7EJU9;Q6NYC1
15.5286331176758	15.8837852478027	15.8741006851196	15.7325811386108	16.0587100982666	15.8832130432129	15.7311372756958	15.800986289978	15.8803033828735	15.8720207214355	EIF3H	B3KS98;O15372
18.7314605712891	18.6885051727295	18.678840637207	18.6983871459961	18.6889839172363	18.5132446289063	18.4589233398438	18.5059242248535	18.5796890258789	18.411075592041	BCAT2	B3KSI3;O15382
15.5530223846436	15.7731027603149	15.7406005859375	15.8108081817627	15.6605529785156	15.892767906189	15.8178234100342	15.7306690216064	15.5539712905884	15.8800354003906	PTGES3L-AARSD1;PTGES3L-AARSD1;AARSD1	B3KSP9;C9J5N1;Q9BTE6
14.5608491897583	14.3426313400269	14.2831344604492	14.6671094894409	14.6742486953735	14.5820999145508	13.8505296707153	13.7225360870361	13.4056024551392	14.125298500061	MORF4L1	B3KTM8;H0YMJ0
15.9255180358887	12.682957649231	14.9315452575684	14.3434944152832	14.3296899795532	11.3782863616943	11.373028755188	16.5178127288818	14.4263324737549	13.8966026306152	ZCCHC10	B3KVL5;Q8TBK6
15.0982761383057	13.9099817276001	15.3251314163208	14.5638437271118	15.5022964477539	15.1631765365601	14.7477045059204	15.4546709060669	15.1037721633911	14.7348957061768	CDIPT	B3KY94;O14735
16.9313564300537	17.3847103118896	17.0935020446777	17.2523899078369	17.3177108764648	17.4690341949463	17.1443557739258	17.3285274505615	17.2820739746094	17.3487606048584	CNN2	B4DDF4;B4DUT8;H3BVI6;Q99439
15.4820642471313	14.8164577484131	14.3766641616821	14.4776430130005	14.5099925994873	15.2587795257568	15.2569713592529	15.1990165710449	15.2003107070923	15.3561878204346	MGMT	B4DEE8;P16455
12.1055860519409	12.2458934783936	13.2522954940796	12.9361248016357	11.5813102722168	10.8774385452271	13.1640510559082	12.7478942871094	12.8650035858154	12.5977830886841	PABPN1	B4DEH8;G3V4T2
14.418815612793	14.1235294342041	14.4911193847656	14.8746128082275	14.0760612487793	14.6136522293091	14.3250665664673	12.6070785522461	13.9950504302979	13.9200572967529	TCF12	B4DGI9;Q99081
9.8935375213623	11.5472640991211	11.7552099227905	11.3445663452148	11.7153749465942	11.2931442260742	11.2059879302979	11.5851678848267	11.6077461242676	11.7920808792114	INTS14	B4DJL6;B4DVT3;H3BRY6;Q96SY0
19.2861728668213	18.858829498291	18.884204864502	18.9493198394775	18.9023189544678	18.8346176147461	18.6737174987793	18.8876190185547	18.8515911102295	18.7726459503174	CS	B4DJV2;O75390
15.6919775009155	15.786018371582	15.71595287323	15.9304027557373	15.7977914810181	15.8489475250244	15.6993579864502	15.5983953475952	15.60888671875	15.6390943527222	PWP1	B4DJV5;Q13610
15.978684425354	15.6512222290039	14.122049331665	15.7291984558105	14.8020696640015	15.7492380142212	14.4495153427124	14.921594619751	15.2899026870728	15.6964378356934	PLEKHA5	B4DJX4
10.4597578048706	11.4624538421631	11.4541025161743	11.7538766860962	10.7784023284912	11.5305757522583	11.5879764556885	10.8718814849854	11.9477758407593	11.3223085403442	TMEM104	B4DKL7;J3QQK2;Q8NE00
14.483998298645	14.4704656600952	14.911018371582	15.0439414978027	14.8946352005005	12.9973402023315	15.5854234695435	14.6920928955078	14.9934711456299	15.1045379638672	EPS8L1	B4DKV7;K7EKX9;K7EN83;Q8TE68
13.7212963104248	14.3515453338623	14.1458215713501	13.9967956542969	14.2017221450806	14.2105131149292	14.2023124694824	13.8662281036377	14.0625667572021	14.2636909484863	CHURC1-FNTB	B4DL54
17.8415241241455	17.4974403381348	17.6704940795898	17.5372924804688	17.4723339080811	17.4267692565918	17.4690933227539	17.38112449646	17.580114364624	17.4473571777344		B4DLN1
15.3895845413208	15.2144727706909	15.280590057373	15.2507085800171	14.7284517288208	14.4884300231934	15.1520586013794	13.6949739456177	14.8709888458252	15.0829372406006	SULT1C2	B4DLP0;B8ZZF7;O00338
11.1901712417603	11.0144577026367	11.3099174499512	11.0586833953857	10.3702688217163	10.0632677078247	11.8337182998657	9.80820369720459	11.4428853988647	11.188157081604	RBCK1	B4DML5;G3XAG9;H0Y4S7;Q9BYM8
15.6515598297119	15.0249919891357	14.6728897094727	15.0622510910034	14.5050392150879	15.17933177948	15.7165956497192	15.6159219741821	15.0637855529785	15.5082511901855	DAP	B4DQ75;P51397
14.7264785766602	15.3207120895386	15.4931945800781	15.3066711425781	15.8105316162109	15.2739734649658	15.2268962860107	15.7319316864014	15.4770488739014	15.4080457687378	SEC61A1	B4DR61;P61619
15.8419160842896	15.8921451568604	15.8011989593506	15.6979961395264	15.8171119689941	15.9433450698853	15.8860845565796	16.0301055908203	15.8049287796021	15.9325361251831	STK24	B4DR80
13.2830848693848	12.7376327514648	13.3617124557495	13.1246500015259	13.0711822509766	12.4371757507324	13.8043994903564	12.0923948287964	13.1790399551392	12.9009885787964	SCML2	B4DRC2;H0Y6S1;Q9UQR0
13.9986085891724	13.7770414352417	13.8302841186523	13.6663751602173	13.754656791687	13.535795211792	13.7886714935303	13.5425453186035	13.6837959289551	13.6432733535767	ZDHHC20	B4DRN8;Q5W0Z9
11.8804178237915	12.4895629882813	12.5540676116943	12.6494693756104	12.3237047195435	12.8197469711304	12.6422719955444	12.5548334121704	12.7387008666992	12.1628074645996	MED29	B4DUA7;M0R3F3;Q9NX70
14.5643091201782	14.610821723938	14.6873302459717	14.6614255905151	14.7423477172852	14.2285308837891	14.400634765625	14.6847486495972	14.5322637557983	13.9128065109253	TMBIM1	B4DUD2;C9IYT2;C9IZ27;C9JEN3;C9JW19;C9JWV9;F8WDY4;Q969X1
14.0392980575562	14.1871881484985	13.9796552658081	14.0037298202515	14.2116203308105	14.0672044754028	14.1281423568726	14.1987800598145	14.1921501159668	14.2936992645264	NME7	B4DXC8;E9PNU1;Q9Y5B8
18.8786029815674	19.1498203277588	19.23171043396	19.0984592437744	19.2886295318604	19.0192317962646	19.0059299468994	19.2147064208984	19.1908588409424	19.0841331481934	ILF2	B4DY09;Q12905
13.4187173843384	14.1130666732788	13.4119415283203	14.0284767150879	14.1979484558105	13.870306968689	13.6513214111328	11.75075340271	13.8043737411499	13.5131912231445	COG8	B4DYU2;H3BQV3;Q96MW5
14.2081356048584	13.6968450546265	13.4109058380127	13.8925580978394	12.7401323318481	12.9288845062256	12.9128675460815	13.1609916687012	12.4986743927002	12.7586326599121	TAF8	B4DZU5;Q7Z7C8
11.058253288269	10.0094442367554	11.6597452163696	11.1250104904175	10.2280101776123	10.3875455856323	10.5251903533936	11.5844259262085	10.9561824798584	11.4243764877319	PEX5	B4E0T2;P50542
14.6003255844116	15.1151390075684	14.9611053466797	15.0702362060547	15.1420917510986	15.3471422195435	15.1786289215088	15.3208856582642	14.9747552871704	15.2004175186157	STK26	B4E0Y9;Q8NBY1;Q9P289
16.1622314453125	16.4099521636963	16.4222602844238	16.6421146392822	16.6810874938965	16.5517044067383	16.5598583221436	15.3827524185181	16.3890399932861	16.2539196014404	DERL1	B4E1G1;E5RGY0;Q9BUN8
13.3459186553955	14.3251485824585	14.1718530654907	14.4501628875732	14.1928071975708	14.5246543884277	14.326024055481	14.5889902114868	14.2174835205078	14.3905763626099	ARMC6	B4E1N1;Q6NXE6
15.3770065307617	15.6278924942017	15.6218271255493	15.5291442871094	15.6305179595947	15.4261474609375	15.4277381896973	15.5594472885132	15.4610910415649	15.2836008071899	ATP2C1	B4E2Q0;H0Y9V7;P98194
15.6219358444214	15.987904548645	15.9770050048828	15.8952198028564	16.0013065338135	15.7759160995483	15.9625186920166	16.0758647918701	15.9762668609619	16.0515079498291	RBPMS	B4E3T4;Q93062
14.1358966827393	13.2946147918701	12.8831176757813	14.1615657806396	14.1911697387695	14.3474187850952	11.6541528701782	13.1578750610352	13.235538482666	13.1335926055908	CDCA5	B5MBX0;Q96FF9
11.9756374359131	13.2742881774902	12.1039505004883	12.5338096618652	11.1349687576294	15.6221446990967	13.2461843490601	13.3103685379028	11.8358869552612	13.2427835464478	CFAP36	B5MC35;B5MCA1;B5MD16;Q96G28
14.3087606430054	14.3367767333984	14.0382480621338	14.2804012298584	14.6617956161499	14.4114475250244	14.2076749801636	13.7952070236206	14.3037166595459	14.8234424591064	HS1BP3	B5MC96;F6TR53;Q53T59
15.8005390167236	15.837607383728	15.9893140792847	16.0662155151367	15.8607740402222	15.8922052383423	15.8074264526367	15.5827112197876	15.9600782394409	15.6944570541382	PES1	B5MCF9;O00541
13.9024362564087	12.8507442474365	13.4798498153687	12.2899475097656	12.6121492385864	12.8707876205444	12.7931499481201	12.6060419082642	13.0824575424194	12.4773378372192	D2HGDH	B5MCV2;Q8N465
13.4828090667725	12.6560821533203	13.0065956115723	13.0772514343262	13.0057764053345	13.1880989074707	13.3365287780762	11.8159246444702	12.6223878860474	10.6321897506714	BRD8	B5MCW3;H7C127;H7C128;H7C179;Q9H0E9
17.7230281829834	17.8479709625244	17.9533214569092	17.9011821746826	17.9416217803955	17.8327865600586	17.8950824737549	17.9681282043457	18.0374240875244	17.9167747497559	CBX1	B5MD17;J3KS05;P83916
14.4622840881348	14.1134643554688	14.503888130188	14.5364675521851	14.7167110443115	14.3149824142456	13.9888706207275	14.1640129089355	14.2493925094604	14.0282821655273	RFT1	B5MDE0;Q96AA3
19.4605350494385	19.5911483764648	19.3519058227539	19.4460506439209	19.6449317932129	19.6854648590088	19.5523529052734	19.6582126617432	19.5063877105713	19.594165802002	RAN	B5MDF5;P62826
14.5459508895874	14.4394540786743	14.3682489395142	14.1393280029297	14.7590503692627	14.1788654327393	14.5951766967773	14.6467819213867	14.4164361953735	14.3170347213745	SEPTIN10	B5ME97;E7EW69;Q9P0V9
12.999418258667	12.5458536148071	13.2420320510864	12.9226522445679	12.8518152236938	12.4807119369507	13.2755336761475	12.536581993103	12.7850961685181	12.1050071716309	CWC22	B7WP74;Q9HCG8
14.465950012207	14.2009391784668	14.4021263122559	14.4132785797119	14.5527296066284	14.2256135940552	14.4621295928955	14.5318212509155	14.4026613235474	14.2291612625122	HNRNPLL	B7WPG3;C9IYN3;Q8WVV9;V9GYK2
0.895160257816315	9.53220462799072	10.286865234375	5.11514759063721	8.92941284179688	9.26158905029297	10.6354217529297	10.4376602172852	9.24392700195313	9.84004974365234	COG2	B7Z2Y2;Q14746
14.5061588287354	14.7416105270386	14.7840957641602	14.8646516799927	14.6749982833862	14.4726457595825	14.6078662872314	14.5791816711426	14.6077604293823	14.7632112503052	TPCN1	B7Z3R2;Q9ULQ1
15.9098625183105	15.5212430953979	15.7166385650635	15.7090883255005	15.3945226669312	15.5798168182373	15.8491067886353	16.1638298034668	15.6735486984253	15.9555187225342	SMAD2	B7Z5N5;Q15796
12.7648963928223	13.0249309539795	13.0270853042603	12.558443069458	12.9775838851929	12.9757537841797	13.2752876281738	13.556939125061	13.1693420410156	13.0905265808105	ARMC8	B7Z637;Q8IUR7
18.7841205596924	18.0585956573486	18.0100135803223	18.1598453521729	17.8843002319336	18.0767307281494	18.133581161499	18.2356472015381	17.9263916015625	18.0389862060547	SYNCRIP	B7Z645
16.070255279541	15.6910219192505	15.9714870452881	15.8431358337402	15.8115653991699	15.7640447616577	15.7864265441895	15.9085969924927	15.7676334381104	15.7295293807983	DDX27	B7Z6D5;Q96GQ7
20.0222835540771	20.0672702789307	19.9211387634277	20.2204399108887	19.8010540008545	19.9981384277344	20.133186340332	20.0224094390869	20.0553665161133	20.1883411407471	MYL6	B7Z6Z4;F8W1R7;G3V1V0;G8JLA2;J3KND3;P60660
16.5043830871582	16.8634605407715	16.916130065918	16.8090343475342	17.1092643737793	16.9427642822266	17.1848735809326	16.9044208526611	17.0533599853516	16.8534164428711	RANBP3	B7Z7F3;Q9H6Z4
16.1372890472412	16.0221920013428	15.8206996917725	16.012186050415	15.6978893280029	15.9046440124512	15.957447052002	15.716628074646	15.8844614028931	15.9737071990967	SH3GLB2	B7ZC38;Q9NR46
15.2970848083496	14.5399732589722	15.2551336288452	15.0557651519775	15.3216457366943	14.8633337020874	14.8655195236206	14.7978296279907	15.2095766067505	14.884202003479	SCARB1	B7ZKQ9
14.0002813339233	13.8851699829102	13.9449796676636	13.9773635864258	13.5079479217529	13.6025133132935	14.1794528961182	14.6405553817749	13.7809991836548	13.7894096374512	PPIL3	B8ZZ77;H7BZ14;Q9H2H8
16.4408092498779	14.6797332763672	14.0942869186401	15.0144090652466	14.2946720123291	14.513279914856	14.2919731140137	14.6169099807739	13.9898233413696	14.468581199646	CCDC115	B8ZZ99;Q96NT0
17.7822246551514	17.2896747589111	17.5401668548584	17.5613098144531	17.3803329467773	17.3156566619873	17.3944454193115	17.0625	17.3757514953613	17.1499652862549	GLS	B8ZZA8
11.2047872543335	11.3496646881104	10.6327514648438	11.7611236572266	11.6144390106201	11.5271711349487	12.5067005157471	10.9496421813965	11.5009002685547	11.9306354522705	METTL5	B8ZZC8;B8ZZE3;B8ZZY8;E7EMN2;F5H4E8;Q9NRN9
12.544261932373	13.944860458374	11.3266944885254	12.998010635376	13.358904838562	12.8738803863525	12.8417959213257	11.3679800033569	13.1674146652222	13.2834796905518	TAX1BP1	B8ZZD4;Q86VP1
14.3421010971069	14.2377910614014	14.5490074157715	14.3932657241821	14.3014736175537	13.9708232879639	14.4106101989746	14.1711730957031	14.3043098449707	14.202766418457	PALS2	B8ZZG1;Q9NZW5
13.6092109680176	14.0436162948608	13.7162933349609	13.9350576400757	14.1274328231812	14.1658124923706	14.3564214706421	14.3826694488525	13.9152488708496	14.0255012512207	PDE6D	B8ZZK5;O43924
18.4748497009277	18.255313873291	18.2840900421143	18.307107925415	18.3236217498779	18.2330532073975	18.3052673339844	18.1661510467529	18.2546730041504	18.1864757537842	SUMO1;SUMO1;	B8ZZN6;P63165;SUMO1_HUMAN
21.7905807495117	20.1697578430176	19.5092315673828	20.1990413665771	19.4546184539795	20.1323013305664	19.5433464050293	19.6775646209717	18.7755489349365	19.981990814209	PTMA	B8ZZQ6;P06454
15.6497554779053	15.559157371521	15.5118808746338	15.3735685348511	15.5361890792847	15.4548044204712	15.3305139541626	15.5610513687134	15.5898447036743	15.4410543441772	AGFG1	B8ZZY2;P52594
15.4766750335693	15.7435817718506	16.0328731536865	15.6869592666626	16.0369205474854	15.8697490692139	16.0097713470459	16.0077857971191	15.9862270355225	15.9047441482544	USP39	B9A018;Q53GS9
11.1792802810669	11.2764053344727	11.5309600830078	10.4358911514282	10.0182104110718	11.2425365447998	12.3911876678467	11.5412425994873	11.4796276092529	11.5766143798828	NT5C3A	B9A035
14.1319227218628	14.2186622619629	14.5906848907471	14.4587297439575	14.406683921814	13.9714879989624	14.3188190460205	14.3187313079834	14.1749286651611	14.2776727676392	RHBDD1	B9A054;Q8TEB9
13.7658271789551	12.8716278076172	13.6636867523193	13.1107749938965	13.4950361251831	13.1641006469727	13.6967029571533	12.9964656829834	13.7395448684692	13.0548610687256	SMARCD2	B9EGA3;J3KMX2;Q92925
13.5785007476807	13.6288156509399	13.6578779220581	13.6936454772949	13.5524129867554	13.406213760376	13.7932243347168	13.4930543899536	13.5270929336548	13.4682054519653	SETMAR	B9ZVV8;Q53H47
15.0457439422607	14.8462562561035	14.9417629241943	15.0074682235718	14.8169851303101	15.0055503845215	15.1955642700195	15.2620725631714	15.0500822067261	15.2717475891113	;BID	BID_HUMAN;P55957
15.4561958312988	15.1444931030273	15.1304264068604	15.2500696182251	15.1165552139282	15.2784748077393	15.1421661376953	15.3801288604736	15.1725625991821	15.219633102417	WASH3P;WASH2P	C4AMC7;Q6VEQ5
12.9072608947754	13.6131181716919	13.5271549224854	13.250617980957	13.6785478591919	13.593581199646	13.3351945877075	13.2415189743042	13.5490159988403	13.3329648971558	ELP6	C9IYN7;C9J2D6;C9J9N8;C9JA82;C9JEX8;C9JLH5;Q0PNE2
12.9901676177979	13.2549858093262	13.574182510376	13.457615852356	13.5739307403564	13.2557611465454	12.6252355575562	13.5399484634399	13.5400161743164	13.3622932434082	PNPLA4	C9IZF6;P41247
17.7587642669678	14.9008226394653	15.0832986831665	14.9165182113647	13.9333267211914	14.0853881835938	15.3392858505249	15.3441209793091	14.9746809005737	15.5308704376221	CUTA	C9IZG4;O60888
15.7793827056885	15.7629585266113	15.5832710266113	15.7063255310059	15.7691507339478	15.8516607284546	15.8680267333984	15.8794183731079	15.7749376296997	15.8198270797729	PCYT1A	C9J050;C9JEJ2;P49585
15.0890312194824	15.1143703460693	15.2280855178833	15.2600536346436	15.3759794235229	15.2131595611572	15.5449304580688	15.5984029769897	15.2537593841553	15.4710083007813	CHMP2B	C9J0A7;Q9UQN3
13.8582382202148	13.5749664306641	13.8071699142456	13.6616268157959	13.7018041610718	13.6572103500366	13.7399854660034	13.7533626556396	13.7287731170654	13.633617401123	ZC3HC1	C9J0I9;Q86WB0
16.8885192871094	17.3347282409668	16.8866958618164	17.0119171142578	17.1146411895752	17.1737041473389	17.0997524261475	16.0222225189209	17.1377372741699	16.9812984466553	PFN2	C9J0J7;G5E9Q6
16.5897808074951	17.1234436035156	16.9041862487793	16.9096546173096	17.0180778503418	17.1872901916504	17.3633975982666	17.3130970001221	17.2247009277344	17.4760265350342	SRI	C9J0K6;P30626
15.7601680755615	15.2793884277344	14.8163785934448	15.0469913482666	14.7593364715576	15.2367973327637	15.3307676315308	15.2592906951904	15.0619878768921	15.292498588562	CDH2	C9J126;P19022
13.6419410705566	14.6348886489868	14.6632957458496	14.2590208053589	14.8468227386475	14.4522829055786	14.5732231140137	14.7735357284546	14.4104890823364	14.4959392547607	UBE2E2	C9J180
14.5647001266479	14.8119506835938	14.4801969528198	14.6820640563965	14.1826419830322	14.8650283813477	14.7340574264526	14.9035634994507	14.7138204574585	14.8617868423462	RNF181	C9J1C6;C9J391;F8WBU5;H7C426;Q9P0P0
15.2858190536499	13.0286111831665	14.6532144546509	14.5121812820435	12.0405569076538	14.8148393630981	12.9156875610352	14.4351930618286	12.3583745956421	14.4451017379761	ABHD5	C9J1D1;Q8WTS1
14.3441114425659	15.2086200714111	14.7986621856689	14.6181344985962	15.413444519043	14.6504535675049	14.7341051101685	15.0341653823853	13.7425222396851	14.7887678146362	ARF5	C9J1Z8;P84085
15.9980115890503	15.9977207183838	15.9915952682495	15.9828443527222	15.9342317581177	15.9430980682373	15.9265432357788	15.968674659729	15.9363822937012	15.9038677215576	POLR2B	C9J2Y9;P30876
12.3055381774902	13.5798053741455	13.4352550506592	13.4811744689941	13.3283157348633	13.3041219711304	13.5427932739258	13.6212329864502	13.4339923858643	13.3544588088989	KCMF1	C9J3I2;Q9P0J7
17.4566764831543	17.6350650787354	17.7673187255859	17.9598331451416	17.9936542510986	18.0299968719482	17.8077716827393	18.1888160705566	17.9297389984131	17.999584197998	RPL37A	C9J4Z3;P61513
13.4644832611084	14.1285371780396	14.3139514923096	14.2702016830444	14.1381931304932	13.6839752197266	14.0028009414673	13.2499694824219	13.9731788635254	13.9808015823364	IGF1R	C9J5X1;P08069
11.3966283798218	12.9215459823608	13.3492012023926	12.739725112915	12.6164531707764	12.6709089279175	12.5496788024902	12.2609415054321	13.6813802719116	12.590292930603	COA1	C9J6J1;C9JA07;Q9GZY4
10.5167598724365	10.9284791946411	11.3633213043213	10.9754037857056	10.7600517272949	11.289605140686	11.3590955734253	9.93977928161621	11.2832746505737	11.2700519561768	RP9	C9J6V2;Q8TA86
17.4146690368652	17.6882152557373	17.4464530944824	17.4973773956299	17.5843391418457	17.7370014190674	17.7262096405029	17.7996616363525	17.5960597991943	17.7926769256592	PFN2	C9J712;P35080
12.6205167770386	13.0156440734863	12.9315824508667	12.9826850891113	13.7180023193359	13.2406616210938	13.3367137908936	12.1980581283569	13.3008031845093	13.2651128768921	TNPO3	C9J7E5;Q9Y5L0
14.3100309371948	14.7452554702759	14.9744272232056	15.0386018753052	14.2710609436035	14.6096086502075	13.9167976379395	14.4631080627441	14.8994064331055	14.5560598373413	COX17	C9J8T6;Q14061
15.3799600601196	15.0366182327271	14.7177772521973	13.9101095199585	14.8144721984863	14.450813293457	14.7066736221313	14.4546213150024	15.221960067749	15.3587121963501	NMD3	C9JA08;Q96D46
18.8750839233398	17.6790599822998	17.7731304168701	18.0359363555908	17.1162166595459	17.7760066986084	17.4730682373047	17.2250061035156	17.2543563842773	17.4348793029785	SSR3	C9JA28;Q9UNL2
17.622314453125	15.8083028793335	16.1319427490234	16.2390251159668	15.6341142654419	15.730996131897	15.7682437896729	15.7292804718018	15.5235319137573	15.3248729705811	;HIGD1A;HIGD1A	C9JAW5;C9JNU6;Q9Y241
13.5331125259399	12.7606344223022	13.2435646057129	13.458062171936	13.3289527893066	13.5084609985352	13.8514242172241	13.4850902557373	13.4547777175903	13.3389940261841	MAPRE3	C9JB30;Q9UPY8
12.8135423660278	12.8358936309814	12.7295246124268	12.652006149292	12.5501289367676	12.4468011856079	13.0293302536011	12.5123052597046	12.476541519165	13.4061126708984	PSPH	C9JBI3;P78330
14.9626541137695	14.6704044342041	14.4569969177246	14.5664892196655	14.552885055542	14.3467969894409	14.5448131561279	14.41858959198	14.5769596099854	14.7602128982544	MRPS33	C9JBY7;Q9Y291
16.9892730712891	16.6897087097168	17.0054397583008	16.9064559936523	16.8173828125	16.5077419281006	16.6988906860352	16.9958953857422	16.63307762146	16.5312595367432	UXS1	C9JCB7;C9JFU6;C9JW33;Q8NBZ7
13.6457395553589	13.8227128982544	13.4807367324829	13.7568368911743	13.2826280593872	13.6001224517822	13.3683404922485	14.0751514434814	13.6728715896606	13.5741767883301	DRAP1	C9JCC6;E9PNC7;Q14919
14.3113784790039	14.7989511489868	14.7914056777954	14.8156795501709	15.0040626525879	14.9305696487427	15.0190896987915	15.2333707809448	14.9270505905151	15.0480918884277	AAMP	C9JEH3;C9JG97;Q13685
13.8896684646606	14.6936054229736	14.3582792282104	14.6612510681152	14.6577768325806	14.8377161026001	14.6777811050415	14.9635467529297	14.6726417541504	14.9350109100342	NAGK	C9JEV6;Q9UJ70
13.0646438598633	12.8739919662476	13.3679246902466	13.0458889007568	12.7184791564941	13.1146383285522	12.7651443481445	12.2259111404419	12.9746770858765	12.935378074646	CDC42EP3	C9JEZ4;Q9UKI2
15.7295417785645	16.0877952575684	15.9661712646484	15.934552192688	16.3011379241943	16.0115795135498	16.0201168060303	16.3126525878906	16.0646171569824	15.96364402771	GPS1	C9JFE4;Q13098
16.4522705078125	16.9893283843994	16.3748683929443	16.1439628601074	16.1657123565674	16.1682605743408	16.3985118865967	16.2752666473389	16.2362651824951	16.3306312561035	CYCS;;CYCS	C9JFR7;CYC_HUMAN;P99999
14.7930889129639	14.6756324768066	14.7790622711182	14.8539724349976	14.7895421981812	14.6140804290771	14.7356071472168	14.4443502426147	14.6641139984131	14.7065896987915	PELP1	C9JFV4;Q8IZL8
16.9522399902344	17.0175876617432	16.9613018035889	16.9791851043701	16.8657512664795	16.8998413085938	17.0199031829834	17.214017868042	16.9536380767822	17.0370540618896	APEH	C9JIF9;P13798
15.6651611328125	15.9082126617432	15.9099912643433	15.6188659667969	16.519250869751	15.8964653015137	15.692497253418	15.9883995056152	16.0293579101563	15.7625160217285	GNB2	C9JIS1;C9JXA5;C9JZN1;P62879
16.3787841796875	15.8254070281982	15.9587545394897	15.6601572036743	16.2708511352539	15.7903423309326	16.2334060668945	16.514965057373	16.1949920654297	16.2313919067383	PSAP	C9JIZ6;P07602
15.2841129302979	14.8910102844238	15.1745500564575	15.0384311676025	15.1872005462646	14.6973285675049	14.9991445541382	14.5903873443604	15.1177501678467	14.665060043335	MRPS34	C9JJ19;P82930
15.3289031982422	13.7119455337524	12.7881441116333	15.5016641616821	15.2005662918091	15.4224710464478	16.1116256713867	15.9937829971313	15.350380897522	16.5359115600586	TUBA4A	C9JJQ8
18.4474945068359	17.9615650177002	18.0333061218262	18.2024974822998	17.7415256500244	17.9685516357422	17.6075038909912	17.6074275970459	17.5683994293213	17.665355682373	ATP5MF-PTCD1	C9JJT5;G3V325
12.9072952270508	14.1354656219482	13.2779302597046	12.8573904037476	13.8292512893677	13.3432960510254	13.9241170883179	13.3985929489136	14.0129642486572	12.6676816940308	SAMD9	C9JKF1;Q5K651
16.5435733795166	16.250617980957	16.3861217498779	16.317699432373	16.1406955718994	16.1323299407959	16.0928344726563	16.1538753509521	16.1229839324951	16.0979843139648	CAV1	C9JKI3
15.0193939208984	14.8055114746094	14.9252338409424	14.7062606811523	15.1148252487183	14.707444190979	14.6538276672363	15.0369834899902	14.8783826828003	14.6667127609253	NDUFB3	C9JKQ2;O43676
16.9526958465576	17.1131381988525	17.0704784393311	17.2758941650391	17.2416534423828	17.3446445465088	17.2644996643066	17.3813495635986	17.0767211914063	17.207540512085	RPS27L	C9JLI6;H0YMV8;Q71UM5
14.3993120193481	14.8416414260864	14.7398109436035	14.5710210800171	14.9759082794189	14.5338687896729	14.464861869812	14.8945474624634	14.777379989624	14.7042074203491	POLR2H	C9JLU1;P52434
16.5185737609863	16.2353496551514	16.0954933166504	16.340892791748	16.1216449737549	16.4743595123291	16.174898147583	16.2145385742188	16.0698261260986	16.3340644836426	MCRIP1	C9JLW8;I3L2L5;I3L4Q0
11.3194932937622	12.6339731216431	12.4567737579346	12.430736541748	12.3838129043579	12.0024156570435	12.2838649749756	12.0158662796021	12.3900060653687	12.5828218460083	OARD1	C9JNE2;C9JXC3;Q9Y530
19.3550262451172	18.870964050293	18.7479763031006	19.0192565917969	18.4946632385254	18.9449844360352	18.7326583862305	18.2829856872559	18.6736164093018	18.75075340271	RPL24	C9JNW5;C9JXB8;P83731
13.9170742034912	15.4111175537109	14.2300806045532	14.71985912323	15.2369966506958	14.9080572128296	14.6815929412842	15.8141584396362	14.4939880371094	14.653263092041	SEC22A	C9JNZ0;C9JRY4;Q96IW7
16.4806842803955	16.7846088409424	16.6466236114502	16.817268371582	16.8926467895508	16.8915920257568	16.4089126586914	16.7287864685059	16.7386684417725	16.7355117797852	CRTAP	C9JP16;O75718
12.0916347503662	12.5362043380737	12.7101955413818	12.25341796875	12.9163436889648	12.7277688980103	12.8555316925049	13.2593374252319	12.8071174621582	12.8114414215088	GNB1L	C9JPQ6;Q9BYB4
15.3448858261108	15.1010608673096	15.5269651412964	15.2582225799561	15.3751010894775	15.2680206298828	15.2931842803955	15.3727884292603	15.1253795623779	15.05810546875	MIX23	C9JQ41;H7C525;Q4VC31
13.6166954040527	13.1379451751709	12.64426612854	13.4288215637207	12.6095294952393	13.3252582550049	12.7942800521851	12.6503896713257	12.8936519622803	12.3405733108521	ZFAND3	C9JQ48;E2QRF5;H0Y398;Q9H8U3
14.642765045166	15.2174139022827	15.2762670516968	14.9503936767578	15.3474836349487	15.2526721954346	15.2049608230591	15.33616065979	15.3032169342041	15.2422037124634	PPIH	C9JQD4;O43447
13.8658828735352	12.5726442337036	13.5213766098022	13.5849456787109	13.7335681915283	12.9943208694458	13.704291343689	13.7911596298218	13.4713268280029	13.4113502502441	PCCB	C9JQS9;E7EUY3;E7EX59;E9PDR0;P05166
14.1271181106567	14.559042930603	14.5984449386597	14.3753871917725	14.668231010437	14.6684513092041	14.6397886276245	14.9459066390991	13.9666185379028	14.5205793380737	TIMMDC1	C9JR82;C9JU35;F8WAU6;F8WB00;F8WC42;G3XA94;H7C5U1;Q9NPL8
13.0500183105469	13.1495170593262	13.2302951812744	13.4383792877197	12.9947128295898	13.09850025177	13.3497047424316	13.193904876709	13.0369110107422	13.2809162139893	LIMD1	C9JRJ5;Q9UGP4
17.2562713623047	16.8914623260498	17.1584148406982	17.0449695587158	17.0052757263184	16.9201011657715	17.1210346221924	16.9173603057861	17.019079208374	16.8229789733887	CHCHD3	C9JRZ6;F8WAR4;Q9NX63
16.3332824707031	15.5590448379517	16.6021366119385	16.4276752471924	16.3517112731934	16.1551761627197	16.5639381408691	16.2879104614258	16.2602958679199	16.4344539642334	FUBP1	C9JSZ1
18.4151153564453	18.1784229278564	17.5413112640381	18.3329658508301	18.1590976715088	18.0592174530029	17.8850803375244	18.239839553833	17.9257354736328	18.1038360595703	SMARCB1	C9JTA6;G5E975;Q12824
11.4255723953247	13.2548999786377	13.2085638046265	13.3728437423706	12.042272567749	11.2951059341431	13.0907802581787	9.90987682342529	13.0507497787476	12.2912178039551	ANKRD54	C9JU48;D3YTC9;H7BZV9;Q6NXT1
12.9940481185913	13.622257232666	13.7090816497803	13.5502700805664	13.8234272003174	12.4626703262329	13.5601625442505	13.8113050460815	13.2709703445435	13.1285152435303	BTN3A3;BTN3A3;BTN3A1;BTN3A2;BTN3A2	C9JUV8;O00478;O00481;P78410;S4R3N0
13.9469318389893	13.8378944396973	14.0648612976074	13.8808917999268	14.7140369415283	14.1988162994385	13.9282693862915	14.48779296875	14.3347625732422	14.2175397872925	DCUN1D1	C9JVE2;Q96GG9
14.3491973876953	13.8532524108887	13.9833040237427	13.9520292282104	13.9159870147705	13.8768320083618	13.9540042877197	13.7862129211426	13.7207155227661	13.4997301101685	THOC5	C9JXG5;F8WCP5;Q13769
10.2468976974487	11.4477939605713	12.0239772796631	11.6326475143433	11.918625831604	10.7656774520874	12.2720556259155	11.8660755157471	11.7192840576172	11.1920785903931	REPIN1	C9JYJ8;C9JZE3;E7EVL6;Q9BWE0
15.3396577835083	13.5836524963379	14.0575494766235	14.1790475845337	14.0163688659668	14.437162399292	14.498462677002	14.2303085327148	14.2100982666016	10.2504758834839	POP7	C9JYM0;O75817
12.3275098800659	13.1634950637817	13.2638959884644	12.9121408462524	14.0710325241089	13.3728370666504	13.8062257766724	13.9164237976074	13.7929801940918	13.575756072998	UBE2H	C9JZG9;C9JZY6;P62256
16.3764114379883	16.4311447143555	16.285551071167	16.4152374267578	16.2995948791504	16.4879570007324	16.3073997497559	16.4688835144043	16.3315315246582	16.3910274505615	RFC4	C9JZI1;P35249
16.7436103820801	16.6487560272217	16.56418800354	16.6336421966553	16.5300064086914	16.5601387023926	16.5043601989746	16.4258270263672	16.4832992553711	16.5153961181641	CTNND1	C9JZR2;O60716
17.4749755859375	16.8712120056152	16.77685546875	16.8004112243652	16.764461517334	16.7844161987305	16.9336185455322	16.9409122467041	16.8745594024658	17.1012859344482	RAPH1	C9K0J5
14.4674425125122	13.0339603424072	11.2940349578857	13.3289175033569	13.0719003677368	13.8591604232788	13.3290863037109	13.3132762908936	12.9004173278809	10.7926616668701	GMNN	C9K0U5;E2QRF9;H7C608;O75496
11.4586353302002	12.8412208557129	13.2765760421753	16.8346424102783	11.1136531829834	11.3477487564087	10.3313179016113	10.54674243927	13.0093326568604	12.0679893493652		CAS1_BOVIN
17.1272373199463	16.7669086456299	16.8140468597412	16.7279891967773	16.7198753356934	16.5977306365967	16.5666389465332	16.531400680542	16.7954845428467	16.6263370513916	;CAT	CATA_HUMAN;P04040
12.0585918426514	11.6248035430908	11.7027044296265	11.765962600708	11.6708602905273	10.6642894744873	12.4291315078735	10.8598594665527	10.4732265472412	10.7658319473267	;CYB5A	CYB5_HUMAN;P00167
17.9322319030762	17.8351364135742	17.9282035827637	17.9664783477783	17.7076454162598	17.853645324707	17.7668361663818	17.4215545654297	17.7359771728516	17.6791648864746	RPL32	D3YTB1;F8W727;P62910
13.5787477493286	13.0731248855591	13.1390724182129	13.3902702331543	12.7532033920288	13.1995677947998	13.0887699127197	12.2614164352417	12.872878074646	12.8654623031616	MRPL35	D3YTC1;Q9NZE8
16.8682613372803	15.8878765106201	16.8913021087646	16.9266605377197	16.5091590881348	15.824969291687	16.517915725708	15.3330240249634	15.9533758163452	15.7201766967773	HLA-B	D5H3J5;Q2L6G2
15.163779258728	15.5255270004272	15.4153461456299	15.2999362945557	15.4181785583496	15.3370800018311	15.3246383666992	15.6913137435913	15.4835557937622	15.5325889587402	CAMK2D	D6R938;E9PBG7;E9PF82;Q13557
13.4827032089233	13.453330039978	12.3839292526245	13.3210954666138	13.4301567077637	12.7048368453979	11.334433555603	11.4634609222412	13.5738544464111	13.1862077713013	IRF2	D6R9N5;D6RB08;K4DIA5;P14316
18.4234771728516	18.5899982452393	18.6758499145508	18.7093238830566	18.5754070281982	18.589282989502	18.5930614471436	17.9556617736816	18.525426864624	18.065580368042	HNRNPAB	D6R9P3;D6RBZ0;D6RD18
10.4510183334351	11.1876544952393	11.5447368621826	11.3436546325684	11.5796051025391	11.2638187408447	11.5054750442505	11.7158679962158	10.7981491088867	10.9770669937134	SLC41A3	D6R9S7;D6RDB0;D6RDM3;D6RHE3;Q96GZ6
16.0060691833496	16.327917098999	16.5387649536133	16.4023609161377	16.7964649200439	16.3005352020264	16.2398319244385	16.7078609466553	16.3938446044922	16.4022922515869	TMEM33	D6RAA6;P57088
13.7968435287476	10.5824584960938	13.6973533630371	11.7413129806519	14.0523052215576	12.4764928817749	13.4792032241821	12.7380657196045	13.9923677444458	12.2414102554321	HGFAC	D6RAR4;Q04756
14.3947238922119	14.5046281814575	14.3249025344849	14.7910661697388	13.5377340316772	14.0696640014648	14.4269847869873	13.4259881973267	14.5023813247681	14.3969945907593	MTRR	D6RAZ2;D6RF21;D6RGC7;H0Y8S9;H0Y963;Q9UBK8
10.3650388717651	12.505259513855	11.9523334503174	12.2534427642822	11.5754308700562	12.3148784637451	12.3795070648193	12.1441411972046	12.418438911438	12.3510208129883	DTWD2	D6RBD8;D6REE2;Q8NBA8
12.8097372055054	12.86789894104	12.2844619750977	12.618293762207	12.5790357589722	12.6976375579834	12.8246240615845	12.4911689758301	12.4925746917725	13.0466260910034	CASP6	D6RBM3;P55212
11.2811822891235	13.3101396560669	13.5342082977295	13.53271484375	13.056263923645	12.9455184936523	13.385947227478	11.8413639068604	13.2315979003906	12.8634023666382	ELMOD2	D6RBS5;Q8IZ81
14.7718486785889	14.5627994537354	14.8475322723389	14.7347841262817	15.306583404541	15.5323848724365	14.416916847229	14.7998943328857	15.0634145736694	14.8475780487061	DCK	D6RCP9;D6RFG8;P27707
13.7543802261353	13.7786045074463	13.9613780975342	13.8096647262573	13.8391799926758	13.5575265884399	14.1896123886108	13.6756868362427	14.0131149291992	13.8565835952759	LIMCH1	D6RD46;E7EPK0;E9PDJ9;G5EA03;H0Y8P3;Q9UPQ0
14.0232400894165	13.45973777771	13.5414304733276	13.7548589706421	13.4884405136108	13.3515615463257	13.5798177719116	13.2091302871704	13.4151172637939	13.4290189743042	CLCN3	D6RDZ6;D6RIX3;P51790
14.3492488861084	14.6627340316772	14.5461568832397	14.5456743240356	14.3205919265747	14.6773700714111	14.6332139968872	13.4723100662231	14.6620874404907	14.1839094161987	MFSD10	D6RE79;Q14728
12.5788974761963	12.8264350891113	12.747706413269	13.1320428848267	12.6699018478394	12.5970211029053	12.6170864105225	12.4820957183838	12.6943416595459	12.7239723205566	MAEA	D6RE80;E7ESC7;Q7L5Y9
12.5457458496094	12.7135934829712	12.30482006073	12.8572597503662	13.0165596008301	12.2134065628052	12.1834030151367	12.7921810150146	12.7478580474854	12.3575029373169	SIL1	D6REA1;Q9H173
15.8985013961792	15.8624143600464	15.8322238922119	15.8977146148682	15.9413290023804	15.9234924316406	15.8320722579956	15.9352893829346	15.8790550231934	15.9849739074707	SEPTIN11	D6RER5;D6RGI3;Q9NVA2
16.8519058227539	17.1466941833496	17.0314483642578	16.9901485443115	17.2803192138672	17.127498626709	17.1410160064697	17.3144512176514	17.2005043029785	17.2573623657227	SEC31A	D6REX3;O94979
15.5550365447998	15.4381074905396	14.9733753204346	15.0355577468872	14.9932899475098	15.293493270874	14.8249397277832	15.2935733795166	14.706470489502	14.9908008575439	STX18	D6RF48;Q9P2W9
14.2267646789551	14.2792329788208	14.5269165039063	14.4783735275269	14.7219200134277	14.2828578948975	14.3515768051147	14.8067741394043	14.3899040222168	14.4900960922241	YIPF3	D6RFI3;D6RGY8;E7EQR8;Q9GZM5
16.421028137207	16.3862323760986	16.7679100036621	16.4957008361816	16.780740737915	16.2866115570068	16.6077709197998	16.4685230255127	16.5445308685303	16.2878952026367	SDHA	D6RFM5;P31040
14.8537139892578	14.6632843017578	14.3404788970947	15.0277242660522	14.3638744354248	15.0199575424194	14.2268495559692	14.6924486160278	14.468448638916	14.9024686813354	SGTB	D6RFW1;Q96EQ0
13.8216018676758	13.331130027771	13.2980117797852	13.8699369430542	12.71409034729	13.1203165054321	12.6453742980957	10.9218378067017	13.2636241912842	13.149866104126	RHOBTB3	D6RG10;O94955
16.5479907989502	16.9578475952148	16.6943664550781	17.0325145721436	16.7135238647461	16.69846534729	16.2222671508789	16.8227691650391	16.5398006439209	16.8760509490967	COL12A1	D6RGG3;Q99715
12.6747283935547	13.0539083480835	13.8378477096558	13.322286605835	12.9278020858765	13.1895513534546	13.4061670303345	12.2724838256836	13.4352912902832	12.8522891998291	TAF9;TAF9;TAF9;TAF9;TAF9;TAF9;TAF9B	D6RGK3;D6RHW1;D6RIE8;D6RIV9;D6RIY1;Q16594;Q9HBM6
15.2256765365601	14.7890882492065	15.2012605667114	15.0873565673828	14.8823843002319	15.1710195541382	14.4795999526978	15.4395885467529	15.0989103317261	15.0340003967285	COX7A2	D6RGV5;D6RIE3;H0UI06;P14406
14.4426393508911	14.1040687561035	14.2934598922729	14.3357849121094	14.0602750778198	13.9157104492188	14.0834112167358	14.0661001205444	13.9965572357178	13.9678316116333	UFSP2	D6RGX2;Q9NUQ7
15.9429531097412	15.7228870391846	15.6553239822388	15.7340173721313	16.0182151794434	15.9145355224609	15.7633934020996	15.7992649078369	15.6276473999023	15.7634563446045	THOC3	D6RGZ2;Q96J01
13.8172416687012	13.9866409301758	13.9531202316284	14.0284519195557	14.1403608322144	13.962119102478	13.9364538192749	13.8615264892578	13.9363880157471	13.8474197387695	EXOSC9	D6RIY6;Q06265
14.928165435791	14.4370803833008	14.637505531311	14.7629127502441	14.2363910675049	14.4350566864014	14.6542654037476	14.2762336730957	14.3395757675171	14.2724599838257	ZNF346	D6RJ07;Q9UL40
9.59278297424316	11.1822395324707	11.5280532836914	9.99012470245361	10.9009294509888	10.2515029907227	10.1700382232666	10.9391527175903	10.1851863861084	10.4525232315063	WDR41	D6RJA5;H0Y9Z3;H0YAA3;Q9HAD4
13.8811807632446	14.0164480209351	13.8109693527222	13.9321269989014	13.6779327392578	13.9055757522583	13.98131275177	13.8937616348267	13.6864738464355	13.9847974777222	INPP4B	D6RJC3;E7EQN9;E9PCZ3;E9PHC0;O15327
15.7364768981934	15.2646646499634	15.39404296875	15.6074686050415	14.5748519897461	15.4024381637573	15.6180934906006	15.64528465271	15.4737529754639	15.6896934509277	PAIP1	D6RJF2
13.11181640625	13.8867835998535	13.929370880127	13.904447555542	13.7847919464111	13.7748565673828	13.8875331878662	13.8296737670898	13.8480920791626	13.94504737854	CLASP2	E3W994;J3KR49;O75122
15.8545665740967	15.9738779067993	16.1036891937256	16.0830574035645	16.070837020874	15.944860458374	15.9304494857788	15.8800849914551	16.0358581542969	15.7848663330078	OPA1	E5KLJ9
14.238899230957	14.5055589675903	14.3609838485718	14.4941635131836	14.645622253418	14.6018972396851	14.6301441192627	14.724702835083	14.5610437393188	14.4536552429199	GINS4	E5RFF9;Q9BRT9
15.8617429733276	15.6818866729736	15.2041940689087	15.6341857910156	15.7054662704468	15.8280868530273	15.5860872268677	15.897084236145	15.2910509109497	15.6141948699951	NUDCD2	E5RFP0;Q8WVJ2
14.9878740310669	15.0687713623047	14.923996925354	15.0897655487061	15.0577659606934	14.9731206893921	15.135871887207	15.1704349517822	14.8380680084229	15.0672273635864	TPD52	E5RFR7
12.8260841369629	13.3413467407227	14.02308177948	13.6730394363403	13.803635597229	13.5073509216309	13.9993581771851	13.5923414230347	14.0485391616821	13.554030418396	SLC39A14	E5RFZ8;E5RGA7;E5RIP4;E5RJ40;E5RJG5;Q15043
11.1132965087891	0.635213613510132	11.8940629959106	10.6492605209351	10.4743242263794	10.5471992492676	11.7530107498169	10.2776355743408	10.6395444869995	10.9904584884644	ZFAND1	E5RGE5;E5RI74;E5RJ74;E5RK75;Q8TCF1
13.0766324996948	14.0953683853149	13.8577566146851	13.4858875274658	13.8319940567017	14.5321273803711	14.7285718917847	15.3147382736206	14.6565494537354	15.0122814178467	ATOX1	E5RGN3;E5RIM7;O00244
14.3877630233765	13.6905851364136	13.6606016159058	13.6672916412354	13.6628684997559	13.773904800415	14.0618543624878	13.388578414917	13.5516347885132	13.4813575744629	REEP4	E5RGS2;Q9H6H4
14.6548633575439	14.3020582199097	14.0943622589111	14.3000659942627	14.053882598877	14.3841352462769	14.2007188796997	14.4195222854614	14.1500911712646	14.2680187225342	CHRAC1	E5RGS9;Q9NRG0
11.0040969848633	13.0393238067627	13.3729410171509	13.0806045532227	12.9329633712769	12.6065444946289	13.0443840026855	12.8429698944092	12.9760675430298	12.6729726791382	TMEM68	E5RGT2;Q49A68;Q96MH6
17.1220455169678	17.1202144622803	16.8432559967041	16.9597949981689	17.0313320159912	17.1315288543701	17.16064453125	17.4596843719482	17.1379089355469	17.3545951843262	ELOC	E5RHG8;Q15369
16.7489986419678	16.8370552062988	16.6311130523682	16.7294445037842	16.873161315918	16.8560543060303	16.2712135314941	16.7368640899658	16.6169853210449	16.7438011169434	RPL30	E5RI99;P62888
15.3114614486694	15.7292509078979	15.5422554016113	15.5740957260132	15.7033386230469	15.6898593902588	15.7969217300415	15.9363384246826	15.7438201904297	15.8681554794312	DNPEP	E5RIA4;E7EMB6;E7ETB3;Q9ULA0
13.4759998321533	13.1407890319824	13.2269973754883	13.3725919723511	12.1728858947754	13.0521869659424	12.4742946624756	12.8167743682861	12.6827125549316	12.6886978149414	POLB	E5RIJ0;E7EW18;P06746
18.032995223999	17.9805374145508	17.8336696624756	17.9796371459961	17.761417388916	18.1227989196777	18.198263168335	18.157543182373	17.8532485961914	18.1373481750488	TBCA	E5RIW3;E5RJD8;O75347
14.6406049728394	14.7574443817139	14.6106061935425	14.8114252090454	14.7947511672974	14.4882106781006	14.6876745223999	14.5804357528687	14.3563289642334	14.8631572723389	AP3M2	E5RJ52;P53677
12.2229070663452	10.6270751953125	12.6839179992676	12.5067777633667	12.2839679718018	12.2199220657349	12.6790590286255	12.8584003448486	12.6151180267334	12.3297290802002	CETN3	E5RJF8;E5RK82;O15182
15.6332035064697	14.4032945632935	14.2668333053589	14.7735929489136	13.5419855117798	14.2054376602173	13.925669670105	13.7987432479858	13.7891263961792	13.9367332458496	SORBS3	E5RJP2
16.1637020111084	16.2331619262695	16.3342094421387	16.257194519043	16.4081554412842	16.4951648712158	16.6892604827881	16.7695446014404	16.3120727539063	16.5111179351807	SKP1	E5RJR5;P63208
13.8992443084717	15.0973892211914	14.6636724472046	14.8545742034912	15.335560798645	14.9346256256104	14.8496427536011	15.2306699752808	15.0532388687134	15.1686182022095	COPS6	E7EM64;Q7L5N1
17.0995903015137	17.0869464874268	17.3622074127197	17.1621417999268	17.304630279541	16.9833507537842	17.1453495025635	17.1522312164307	17.3032836914063	17.0196399688721	FLOT2	E7EMK3;J3QLD9;Q14254
12.9702701568604	14.3033180236816	14.4454584121704	13.234806060791	14.8068599700928	13.813648223877	14.2891597747803	14.567626953125	14.4619932174683	14.3731336593628	NPC2	E7EMS2;G3V3D1;G3V3E8;H0YIZ1;J3KMY5;P61916
13.8673324584961	14.0455265045166	13.4614238739014	14.3873949050903	14.3596038818359	14.1959066390991	14.05690574646	13.2937774658203	14.3286485671997	13.3824586868286	TACC2	E7EMZ9;E9PBC6;O95359
12.786750793457	13.1339473724365	12.6124458312988	13.2653160095215	13.5982456207275	13.3539638519287	12.8877811431885	13.3447999954224	12.1376514434814	13.175012588501	LONP2	E7EN44;Q86WA8
14.0062084197998	13.8868236541748	13.691309928894	13.8263111114502	13.5422019958496	13.9573707580566	13.9232139587402	13.5914220809937	13.7945137023926	13.8340482711792	MED22	E7EN96;E9PGW7;Q15528;Q5T8T7;Q5T8T8
15.8902597427368	14.8719701766968	14.2635717391968	14.4572515487671	14.6416435241699	14.851731300354	14.2676706314087	14.3585605621338	14.3787240982056	14.3298816680908	COL6A3	E7ENL6;P12111
15.1121501922607	14.7003326416016	14.8278360366821	14.9598827362061	14.8138704299927	14.8426599502563	14.5800352096558	14.605447769165	14.738959312439	14.6541595458984	IMP4	E7ENR5;H0Y714;Q96G21
9.95845985412598	10.819221496582	11.4722709655762	10.554087638855	11.7986097335815	11.3387308120728	11.6324157714844	11.100061416626	11.8261556625366	11.5982227325439	CPNE8;CPNE8;CPNE9;CPNE5	E7ENV7;Q86YQ8;Q8IYJ1;Q9HCH3
13.9558238983154	13.3153467178345	13.2757358551025	14.1278009414673	13.0346851348877	13.9593801498413	12.7917976379395	13.7228870391846	13.2404632568359	13.2346515655518	C19orf25	E7EP72;Q9UFG5
20.4120826721191	19.9188022613525	19.7300834655762	20.114631652832	19.8323860168457	20.027458190918	19.704927444458	19.5836868286133	19.5275096893311	19.4515419006348	RPL14	E7EPB3;P50914
18.1762237548828	17.6016750335693	17.8873081207275	17.9178695678711	17.4051456451416	17.3126907348633	17.6294631958008	17.5213527679443	17.5808506011963	17.5281372070313	ACSL1	E7EPM6;P33121
15.6640291213989	15.7360439300537	15.7965106964111	15.8645353317261	15.679988861084	15.8155126571655	15.9051198959351	15.8430366516113	15.7647294998169	15.7043428421021	PRRC2C	E7EPN9;Q9Y520
12.1126346588135	12.3832530975342	12.3522930145264	12.8096790313721	12.0527791976929	12.284815788269	12.8644552230835	11.8233060836792	12.4529085159302	12.2755689620972	CHEK1	E7EPP6;O14757
11.331169128418	10.9373407363892	12.1777353286743	12.4158754348755	11.5412406921387	10.2217044830322	11.5662651062012	10.7528247833252	11.7208595275879	11.3233776092529	PTPRM	E7EPS8;P28827
16.5998287200928	16.5329761505127	16.8262062072754	16.5629482269287	16.581226348877	16.5101451873779	16.6935958862305	16.7488975524902	16.6217918395996	16.3644123077393	NDUFV2	E7EPT4;P19404
16.2471599578857	16.2628364562988	16.3059463500977	16.3388977050781	16.1918563842773	16.1499862670898	16.3147678375244	16.2031173706055	16.1451015472412	16.1902484893799	STAU2	E7EPX0;E7EVJ4;Q9NUL3
17.8715362548828	18.399112701416	16.0085220336914	16.3968238830566	16.2296543121338	16.5410022735596	15.1436719894409	16.4855442047119	16.1637725830078	16.1271953582764	PRSS1	E7EQ64;P07477
15.8675899505615	16.0131072998047	15.8906955718994	16.0947856903076	15.9770288467407	16.1347827911377	15.9431591033936	15.7661476135254	16.0022449493408	16.1517906188965	NAA50	E7EQ69
14.6935615539551	15.0712471008301	15.4134321212769	14.8274412155151	15.7947025299072	14.8927383422852	15.0835809707642	14.722071647644	14.9206571578979	14.6125831604004	TMED2	E7EQ72;F5GX39;Q15363
16.8028335571289	16.309476852417	16.8258647918701	16.5981616973877	16.969669342041	16.4731025695801	16.6156558990479	16.4608135223389	16.4655017852783	16.4939041137695	LTF;LTF;LTF;	E7EQB2;E7ER44;P02788;TRFL_HUMAN
17.3076343536377	18.2336158752441	18.2833118438721	18.2658920288086	18.2113742828369	18.1299343109131	18.3458557128906	18.3203716278076	18.5254535675049	18.4551410675049	WASHC5	E7EQI7;Q12768
14.330304145813	13.9547920227051	13.9658651351929	13.8841753005981	13.8002986907959	13.9613418579102	13.9983243942261	13.8962154388428	13.9860363006592	13.9401826858521	DYNC1I2	E7EQL5
19.7492008209229	19.9269218444824	19.6069526672363	19.8082599639893	19.7274761199951	19.9474906921387	19.7017688751221	19.5979766845703	19.6502265930176	19.8109169006348	EZR	E7EQR4;P15311
14.9087152481079	14.8166561126709	14.8429622650146	14.8199920654297	14.9508228302002	14.8619251251221	14.6200113296509	14.7746496200562	14.7955627441406	14.7188730239868	MTA3	E7EQY4;E7EV10;Q9BTC8
12.9855861663818	13.3263874053955	13.4113712310791	13.208890914917	13.2813005447388	12.9142055511475	13.3204803466797	13.2905521392822	13.4690341949463	12.9169092178345	ERMP1	E7ER77;Q7Z2K6
14.4761352539063	14.4692354202271	14.6954660415649	14.658260345459	14.5969610214233	14.4158573150635	14.7406949996948	14.5271224975586	14.4175987243652	14.2381973266602	ZC3H18	E7ERS3;Q86VM9
16.7883987426758	16.9232921600342	16.9775199890137	17.0142574310303	17.1052284240723	17.0222244262695	17.2608184814453	17.2484531402588	17.1031703948975	17.1117191314697	CAST	E7ES10;P20810
15.1480293273926	15.5512018203735	15.4241628646851	15.3338394165039	15.7638826370239	15.4218435287476	15.5555849075317	15.8183040618896	15.6102352142334	15.681529045105	XPO7	E7ESC6;Q9UIA9
13.7743787765503	13.5378437042236	13.2336750030518	13.5107870101929	13.6275386810303	13.3643674850464	13.5640163421631	13.431468963623	13.247935295105	13.9447746276855	FAM114A2	E7ESJ7;Q9NRY5
14.8485708236694	14.7018146514893	14.8346042633057	14.8183813095093	14.9433002471924	14.8256940841675	14.4968461990356	14.4708986282349	14.5591697692871	14.3296670913696	SDC2	E7ESK6;E9PBI9;P34741
14.7697649002075	15.1121377944946	15.4811058044434	15.2142734527588	15.5396013259888	15.0034914016724	15.0962743759155	15.4061326980591	15.3411846160889	15.1668787002563	MRPL22	E7ESL0;J3KQY1;Q9NWU5
13.9052381515503	13.4781332015991	13.7182655334473	13.9051637649536	13.5210647583008	13.6318883895874	13.4781198501587	13.8401927947998	13.5390377044678	13.7454738616943	MTA1	E7ESY4;Q13330
11.0872974395752	13.2955951690674	13.3960666656494	13.754002571106	13.6300392150879	13.662073135376	12.0153398513794	12.9160079956055	13.5566968917847	13.2867021560669	PLAU	E7ET40;P00749
14.96546459198	14.8823137283325	14.9866800308228	14.9150314331055	15.093789100647	14.9223642349243	14.8945770263672	14.9857387542725	14.9721202850342	14.8554754257202	MRPL3	E7ETU7;H0Y9G6;P09001
13.8236541748047	13.4679956436157	13.5810251235962	13.4789419174194	13.940393447876	13.6677207946777	13.6473541259766	13.2946081161499	13.6440906524658	13.38316822052	PLOD2	E7ETU9
12.5684776306152	12.2323083877563	12.8972682952881	12.2606334686279	13.2386255264282	12.8004198074341	13.019359588623	13.2050142288208	13.1828002929688	12.5549297332764	TCOF1	E7ETY2
14.2637090682983	14.4402837753296	14.2335500717163	14.2708578109741	14.0625314712524	14.5360813140869	14.3068647384644	14.1661987304688	14.4130878448486	14.6997232437134	BZW2	E7ETZ4;Q9Y6E2
14.0038433074951	14.1439380645752	14.2324075698853	14.2568054199219	14.0968017578125	14.1701803207397	14.4007425308228	14.3583583831787	14.2352237701416	14.0949268341064	PUS7	E7EUH7;Q96PZ0
14.2209138870239	14.2354526519775	14.2194910049438	14.4925050735474	14.2214937210083	14.4439210891724	14.3388452529907	14.6763982772827	14.3759441375732	14.4254770278931	DUS2	E7EUN9;Q9NX74
17.7671985626221	17.8841705322266	17.8362922668457	17.8609809875488	17.8902683258057	17.9426670074463	17.919075012207	17.9731941223145	17.8396797180176	17.9264049530029	EIF4G1	E7EUU4
18.150276184082	18.2633152008057	18.2275943756104	18.2391300201416	18.1512775421143	18.283842086792	18.3716850280762	18.6192474365234	18.3198280334473	18.48024559021	MAP4	E7EVA0
14.6425371170044	14.6415729522705	14.5575647354126	14.3824911117554	14.2336988449097	14.2424230575562	14.5562973022461	13.7001810073853	14.3097896575928	14.3754596710205	ATG16L1	E7EVC7;Q676U5
13.4965829849243	13.5599489212036	13.6721687316895	13.6758918762207	13.5569190979004	13.4163284301758	13.6778125762939	13.4768953323364	13.5408992767334	13.4402894973755	PBRM1	E7EVG2;H0Y5B5;Q86U86
13.5947504043579	13.4598627090454	13.7722082138062	13.8361654281616	13.8016119003296	13.5742111206055	13.9816188812256	13.4728565216064	13.7749443054199	13.4842414855957	PHF3	E7EVH3;Q92576
11.6768789291382	12.3269596099854	12.5862970352173	12.1190547943115	13.1152782440186	12.3223791122437	12.7474794387817	13.2902822494507	12.4180755615234	12.8058166503906	PCYOX1L	E7EVZ5;Q8NBM8
13.2762269973755	13.117259979248	13.3900709152222	13.4916353225708	13.1889381408691	13.2707281112671	13.6002979278564	13.0075874328613	13.0087203979492	12.8829774856567	SDAD1	E7EW05;Q9NVU7
14.4251918792725	14.581958770752	14.635570526123	14.6309576034546	14.6202735900879	14.7861652374268	14.705491065979	14.8629465103149	14.8716983795166	14.8965425491333	FBLIM1	E7EWE8;Q8WUP2
15.3537998199463	15.2267818450928	15.3499040603638	15.3482065200806	15.042426109314	15.0039472579956	15.0343265533447	14.6580410003662	15.1720123291016	14.9037065505981	NDUFB5	E7EWP0;H0Y886;O43674
17.7851829528809	17.587064743042	17.6069393157959	17.6156311035156	17.4878368377686	17.7668972015381	17.7882022857666	17.6985015869141	17.5961246490479	17.6576480865479	EIF4B	E7EX17;P23588
13.3582944869995	13.2378044128418	13.1552038192749	13.3405351638794	12.8421096801758	13.2346925735474	13.2308311462402	13.0276203155518	13.0429782867432	12.9679498672485	CHTF18	E7EXA6;Q8WVB6
15.7978200912476	14.4110260009766	14.3810033798218	14.7785587310791	13.8863182067871	14.1797065734863	14.0185670852661	14.1519317626953	13.9631099700928	14.1277465820313	ALYREF	E9PB61
14.5751218795776	14.8437576293945	14.9719686508179	15.0903015136719	12.3988313674927	14.4864826202393	14.5616044998169	14.7916879653931	14.6260833740234	14.6735420227051	POLR2D	E9PB93;E9PHV4;O15514
13.7805309295654	13.6327219009399	14.0149908065796	18.5006999969482	12.968918800354	20.0845355987549	13.2166404724121	13.5219354629517	13.6759376525879	12.7811517715454	EPN2	E9PBC1;F6PQP6;I3L2B2;O95208
17.769983291626	17.7980651855469	17.8415412902832	17.8234481811523	17.8994045257568	17.8879680633545	17.9137668609619	17.7570934295654	17.8842811584473	17.7871932983398	RBBP7	E9PC52;Q16576
12.2865076065063	12.0107889175415	12.4721450805664	11.7930965423584	10.7969236373901	10.8396663665771	12.4602632522583	10.9645071029663	11.3073978424072	11.4028615951538	MAN2B2	E9PCD7;H0YA68;Q9Y2E5
16.6918621063232	16.3726444244385	16.5503063201904	16.5514850616455	16.3408718109131	16.3036117553711	16.4017639160156	16.23069190979	16.3508586883545	16.3190536499023	OGDH	E9PCR7;E9PDF2;Q02218
16.4559555053711	16.1391124725342	16.1854515075684	16.1955966949463	16.0523452758789	16.0453815460205	16.0627746582031	15.9711608886719	16.1348419189453	16.0352458953857	GOSR1	E9PCW1
16.1457500457764	16.2657985687256	16.1997661590576	16.2527084350586	16.2926712036133	16.3841552734375	16.3060970306396	16.3197689056396	16.2989807128906	16.2409400939941	SMC4	E9PD53;Q9NTJ3
16.3565540313721	16.5908641815186	16.570707321167	16.5298767089844	16.6934680938721	16.5795078277588	16.4411106109619	16.5697631835938	16.5592994689941	16.5195350646973	MYO1B	E9PDF6;O43795
14.2581405639648	14.4473276138306	14.6331748962402	14.3125200271606	14.6188144683838	14.3150854110718	14.3076210021973	14.9381494522095	14.4442853927612	14.5142431259155	MRPS17;hCG_1984214;MRPS17	E9PE17;I3L0E3;Q9Y2R5
14.220157623291	14.2387361526489	14.496374130249	14.3638401031494	14.4149017333984	14.0049152374268	14.282546043396	14.4235801696777	14.3545732498169	14.2273101806641	ACADS	E9PE82;P16219
18.0516300201416	18.0070667266846	18.0020942687988	18.0151023864746	17.9285373687744	18.05491065979	18.1075248718262	18.1585006713867	18.0515537261963	17.9315204620361	FUBP1	E9PEB5;Q96AE4
13.2062749862671	12.6220455169678	13.5626077651978	12.6232166290283	13.7001399993896	12.3792724609375	13.7417325973511	12.8384971618652	13.4688491821289	12.7000713348389	NRP1	E9PEP6;O14786
14.1789598464966	13.8809823989868	14.2009963989258	14.1411266326904	13.9242496490479	13.5658502578735	14.1347570419312	14.1104879379272	14.1001949310303	13.8669185638428	ZFX;ZFY;ZFX	E9PEP7;P08048;P17010
16.5000991821289	16.7483100891113	16.9637680053711	16.7784404754639	16.697717666626	16.5712490081787	16.7364387512207	16.6707248687744	16.803674697876	16.7234802246094	DLD	E9PEX6;P09622
17.2265758514404	17.3393650054932	17.3755912780762	17.3909912109375	17.4491786956787	17.2806415557861	17.4004573822021	17.3633060455322	17.3063640594482	17.2837047576904	NUP155	E9PF10;O75694
14.7288770675659	14.3368673324585	14.5669765472412	14.218430519104	14.3909387588501	13.8981046676636	14.4075498580933	14.1359529495239	14.4422292709351	14.086932182312	ACSF2	E9PF16;Q96CM8
16.5624160766602	16.5468063354492	15.5893402099609	16.5239505767822	16.6406211853027	15.8914318084717	16.3434047698975	15.3319473266602	16.5916862487793	16.5991153717041	VCAN	E9PF17;P13611
14.1531534194946	14.2424983978271	14.3943729400635	14.3322162628174	14.2346801757813	14.0507593154907	14.064525604248	13.9507846832275	14.0967893600464	14.0566654205322	TBL2	E9PF19;Q9Y4P3
13.5785598754883	13.045862197876	13.2317953109741	12.8573131561279	13.5746097564697	13.6639556884766	13.0960893630981	13.4450225830078	13.3505525588989	13.1393594741821	RND3	E9PFH1;P61587
13.2336950302124	12.9642314910889	12.6066741943359	13.2256784439087	13.4579210281372	13.045597076416	12.9969348907471	12.4752206802368	13.3331508636475	13.0769262313843	RABGEF1	E9PFK9;Q9UJ41
13.8415803909302	13.6047334671021	13.5981397628784	13.5894641876221	13.2122602462769	13.2956047058105	13.6009426116943	13.6367626190186	13.5847358703613	13.6697330474854	PIK3R2	E9PFP1;O00459
13.3785247802734	13.6787052154541	13.6885356903076	13.8100385665894	13.5383815765381	13.5293741226196	13.8305959701538	13.1641855239868	13.4382047653198	13.740216255188	PHLDB2	E9PFQ4;Q86SQ0
18.2728633880615	18.5486831665039	18.2798366546631	18.4582614898682	18.4817752838135	18.584077835083	18.4495162963867	18.603967666626	18.4098300933838	18.6094093322754	PPP2R5D	E9PFR3;Q14738
16.8863906860352	17.175350189209	17.1714191436768	17.1467456817627	17.3174533843994	16.9835567474365	17.0226821899414	17.2092437744141	17.1300525665283	17.0733108520508	AP2M1	E9PFW3;Q96CW1
12.8126173019409	13.9177484512329	13.775562286377	13.9678592681885	13.7987546920776	13.769718170166	13.3391389846802	14.1290874481201	13.9577512741089	13.7215061187744	CEP97	E9PG22;Q8IW35
13.144907951355	13.51171875	13.4818496704102	13.9559698104858	14.1307163238525	13.9712076187134	13.7655153274536	14.1861000061035	13.5524463653564	13.784387588501	RASA1	E9PGC0;P20936
13.5653228759766	13.4467658996582	13.5937366485596	13.478663444519	13.6557760238647	13.1524629592896	13.3812942504883	13.2061014175415	13.6007623672485	13.2467231750488	PTPRK	E9PGC5;Q15262;Q5TG12
15.116771697998	13.8080530166626	13.7814302444458	14.5372076034546	13.1236429214478	14.0122709274292	14.8273515701294	13.2200689315796	13.6547393798828	13.2459306716919	RBM6	E9PGM9;P78332
16.3078155517578	16.9043521881104	16.6430511474609	16.6611843109131	16.995044708252	16.7797164916992	16.7336616516113	17.0218753814697	16.88059425354	16.966796875	TSN	E9PGT1;Q15631
14.7685117721558	15.3793983459473	15.3438987731934	15.2667350769043	15.2505645751953	15.2487878799438	15.3138151168823	15.5535688400269	15.3638067245483	15.426290512085	RPS6KA1	E9PGT3;Q15418
16.6000328063965	16.3272800445557	16.4136962890625	16.4812488555908	16.2481937408447	16.512565612793	16.4297065734863	16.6104106903076	16.2876644134521	16.3776531219482	COPS8	E9PGT6;Q99627
14.35950756073	14.0225677490234	14.4417247772217	14.1764268875122	14.443775177002	13.9665832519531	14.6546010971069	14.1791648864746	14.2194004058838	14.135929107666	CALD1	E9PGZ1
16.4318962097168	16.1936702728271	16.3899326324463	16.150089263916	16.4839992523193	16.0083465576172	16.1631088256836	16.1245460510254	16.1758499145508	15.9533224105835	NDUFB9	E9PH64;Q9Y6M9
12.3228416442871	13.0379209518433	13.6147174835205	13.3937005996704	13.1699342727661	12.67746925354	13.5730285644531	13.0451860427856	13.4150524139404	13.1491451263428	MCCC1	E9PHF7;F5GYT8;Q96RQ3
11.1040802001953	12.8693428039551	12.600757598877	12.2616186141968	12.7015743255615	12.0886259078979	11.9476270675659	9.78930282592773	11.9087104797363	11.5539274215698	CYP20A1	E9PHG5;Q6UW02
12.1705923080444	12.5654048919678	12.8859663009644	12.7654285430908	12.7249956130981	11.5457487106323	12.5989713668823	11.9089336395264	12.7912712097168	12.4231443405151	POLR3C	E9PHH9;Q9BUI4
13.4903564453125	13.7028751373291	13.8395051956177	13.8038272857666	13.6540288925171	13.5819892883301	13.6880540847778	13.6558589935303	13.839469909668	13.6819553375244	SUN1	E9PHI4;O94901
13.7021827697754	13.0390739440918	13.2400588989258	13.3785934448242	13.1012201309204	13.0120334625244	13.1846914291382	13.3452758789063	13.2788152694702	12.93479347229	ITPRID2	E9PHV5;P28290
14.5623273849487	14.8139667510986	14.9743747711182	14.8548316955566	14.8826665878296	14.8310308456421	14.4240350723267	14.1862726211548	12.8284959793091	14.3018789291382	STX17	E9PIC2;E9PJV6;P56962
11.2115049362183	11.7470779418945	12.2556161880493	10.5362548828125	11.8579912185669	12.0777549743652	11.9391050338745	8.87822723388672	12.3090772628784	11.4129600524902	MTMR1	E9PIH9;F8WA39;H0YDX3;Q13613;Q8NEC6
16.6558971405029	16.4748420715332	16.3759078979492	16.4235019683838	16.4954414367676	16.5431709289551	16.3400325775146	16.6808700561523	16.5035648345947	16.5395278930664	CREBZF	E9PIM0;J3KN20;Q9NS37
14.4271402359009	14.2173366546631	14.0470733642578	14.1678142547607	14.1363544464111	13.9226331710815	14.0746831893921	13.9527645111084	13.903733253479	13.8759803771973	TMEM41B	E9PJ42;Q5BJD5
15.9768543243408	15.5633773803711	15.6969966888428	15.6957244873047	15.6272783279419	15.4137239456177	15.467677116394	15.7021703720093	15.6127738952637	15.5211172103882	SLC25A22	E9PJH7;Q9H936
12.5161666870117	9.52929496765137	13.1291875839233	12.7122201919556	12.4170970916748	11.4492406845093	12.6878070831299	13.0768432617188	11.8991632461548	12.6658792495728	ACOT8	E9PJN0;H7C5A7;O14734
12.6070508956909	12.097957611084	10.3365268707275	12.8404922485352	12.3622541427612	12.6200580596924	11.114221572876	13.4468669891357	12.4084978103638	12.9337730407715	AAMDC	E9PJP1;E9PLK9;E9PR47;K4DI89;Q9H7C9
19.9780941009521	20.0178089141846	20.0418453216553	20.0563869476318	19.9404430389404	20.1050148010254	20.1323528289795	20.0528030395508	20.0568218231201	20.036771774292	EEF1D	E9PK01;P29692
13.4994478225708	13.4124565124512	12.6361083984375	12.7464294433594	12.8024635314941	12.7472429275513	12.5156803131104	12.7174386978149	12.8382768630981	12.9526271820068	SNX15	E9PK26;E9PMW6;Q9NRS6
15.5717096328735	15.8058423995972	15.6553173065186	16.0048046112061	15.0846815109253	15.5022325515747	15.6118545532227	15.394268989563	15.5893535614014	15.6261425018311	ZNRD2	E9PK41;H0YEB6;H0YEK1;O60232
15.0011262893677	15.2176208496094	15.080005645752	14.9218645095825	14.988697052002	15.020809173584	15.0580816268921	15.1960535049438	15.1337251663208	15.1670570373535	SCYL1	E9PK59;E9PS17;Q96KG9
13.7989406585693	14.2403059005737	13.9786472320557	14.371319770813	14.6665534973145	14.2773494720459	13.910514831543	13.939284324646	14.2723140716553	14.3096303939819	SIRT3	E9PK80;E9PM75;E9PN58;Q9NTG7
14.3091192245483	13.3192720413208	14.0717430114746	13.9355134963989	13.6129379272461	13.8119659423828	13.9090757369995	12.1795854568481	13.7286252975464	12.9456148147583	BCLAF1	E9PK91
14.4884347915649	14.1828107833862	14.1844644546509	14.3210401535034	14.2858915328979	14.1633195877075	14.0846481323242	14.0476102828979	14.174901008606	14.0691967010498	PLEKHA7	E9PKC0;Q6IQ23
12.3752784729004	13.0676918029785	12.6873092651367	12.3280868530273	13.0201730728149	12.6682062149048	12.5528354644775	13.0567016601563	12.8861484527588	12.7688856124878	PPP6R3	E9PKF6;H7BXH2;Q5H9R7
16.4261703491211	16.7997646331787	16.7055969238281	16.648229598999	17.3682880401611	16.8492984771729	16.758975982666	17.0924911499023	16.9382972717285	16.855525970459	PRMT1	E9PKG1;Q99873
17.2507514953613	17.2174949645996	17.1486263275146	17.2679538726807	16.9947128295898	17.1263771057129	17.0422859191895	16.8746128082275	17.0657444000244	17.0651836395264	UBTF	E9PKP7;P17480
17.0399799346924	16.6453056335449	16.4579849243164	16.62912940979	16.4093532562256	16.6510391235352	16.4935531616211	16.2646675109863	16.5030555725098	16.5865936279297	TMEM123	E9PKT4;Q8N131
8.39295482635498	10.759913444519	11.3615560531616	10.8582077026367	11.1415500640869	10.8537569046021	11.2817935943604	11.5962839126587	10.7756586074829	9.9635648727417	GANAB	E9PKU7
18.4719924926758	18.162992477417	18.2673721313477	18.2961807250977	18.2419700622559	18.2113170623779	18.2294521331787	18.1760959625244	18.074390411377	17.8734512329102	PPIE	E9PKY5;Q9UNP9
13.5171403884888	13.1807460784912	12.7715587615967	13.0702047348022	13.4299049377441	12.9847583770752	13.3141460418701	13.0012588500977	13.010669708252	13.1577606201172	CLP1	E9PL17;Q92989
12.8132486343384	12.9005851745605	12.8999471664429	12.7825384140015	12.5748929977417	13.6247034072876	13.3557929992676	12.5946340560913	13.1114387512207	13.0111961364746	NEDD8-MDP1	E9PL57
15.1645278930664	14.6742677688599	15.4390316009521	14.7264585494995	14.5262870788574	14.4118213653564	15.2825231552124	15.2608251571655	14.6240720748901	14.7753629684448	EEF1D	E9PL71
15.7237310409546	14.8112087249756	14.8615999221802	15.0380792617798	14.8433513641357	14.8095073699951	14.7895841598511	14.6467370986938	14.6064558029175	14.5273876190186	PTDSS2	E9PLE4;E9PS47;Q9BVG9
14.2816390991211	13.8183307647705	14.5809535980225	14.9160709381104	14.7091312408447	12.9740791320801	14.1980829238892	13.6770877838135	13.7190189361572	13.8979225158691	EIF1AD	E9PLI6;E9PS30;E9PS76;Q8N9N8
11.0740566253662	11.5319442749023	11.8662595748901	11.2047719955444	11.5360803604126	11.2880201339722	11.7257461547852	11.5262832641602	11.8739309310913	11.5040044784546	THEM4	E9PLJ7;F6XC58;Q5T1C6
19.6008167266846	19.9785709381104	19.8618221282959	19.8300609588623	19.9521007537842	19.8760108947754	19.9650745391846	20.1434555053711	19.9519386291504	20.0659484863281	NPEPPS	E9PLK3;P55786
13.9670267105103	13.3489103317261	13.5598564147949	13.3503522872925	13.9270420074463	13.6381635665894	13.5241422653198	13.7979364395142	13.7749147415161	13.5785274505615	CARS1	E9PLP0
13.4734048843384	13.328987121582	13.5217237472534	13.4261999130249	13.5592164993286	13.5701036453247	13.6321935653687	13.7172803878784	13.7122821807861	13.5205354690552	PEX16	E9PLS4;E9PMM3;E9PP98;Q9Y5Y5
15.3708248138428	14.7474966049194	14.7734661102295	15.0260753631592	15.2075462341309	14.9567985534668	14.7604570388794	15.1046495437622	14.8016891479492	14.7436790466309	GPAA1	E9PLV6;E9PPZ9;O43292
15.9658279418945	15.6356449127197	15.0213193893433	15.4041585922241	15.1096429824829	15.9013404846191	14.9340286254883	15.0033960342407	15.4753589630127	15.2163391113281	MACF1	E9PLY5
15.946120262146	15.9166307449341	15.9970645904541	15.8471612930298	15.9722442626953	15.9039363861084	15.9778594970703	15.8109426498413	15.9273328781128	15.8998737335205	DCUN1D5	E9PM04;Q9BTE7
13.6504821777344	13.8566217422485	14.0784540176392	13.8120517730713	14.2567443847656	13.9188241958618	13.9271097183228	14.1529989242554	14.0464210510254	13.6829423904419	TCIRG1	E9PM12;E9PMC5;Q13488
15.333854675293	15.2298803329468	15.3023290634155	15.3847036361694	15.2829446792603	15.437162399292	15.4365215301514	15.540168762207	15.4291038513184	15.3236513137817	C11orf58;C11orf58;SMAP	E9PM92;E9PRZ9;O00193
9.65145778656006	10.732551574707	11.5988264083862	11.5576276779175	11.4644985198975	11.9960193634033	11.9441394805908	8.31103420257568	11.4585285186768	11.6131172180176	WRAP53	E9PMG4;Q9BUR4
16.2489223480225	16.2201366424561	16.2841854095459	16.3912525177002	16.354772567749	16.5535659790039	16.4424896240234	16.7137413024902	16.3141136169434	16.5034656524658	CLNS1A	E9PMI6;J3KN38;P54105
14.4514102935791	14.0139827728271	14.3122301101685	14.2722244262695	13.9266510009766	13.9919700622559	14.154296875	14.1702947616577	14.130220413208	14.0272092819214	LMO7	E9PMP7
13.3324146270752	13.3934688568115	13.7303695678711	14.3264532089233	13.6177749633789	13.8564205169678	13.7982263565063	13.8305292129517	13.6717205047607	13.4677772521973	HSF1	E9PMQ6;Q00613
12.8485717773438	13.3600568771362	13.600266456604	13.4315538406372	13.0916175842285	13.1978225708008	13.6720085144043	13.3801383972168	13.4356317520142	13.2580270767212	ARHGEF12	E9PMR6;Q9NZN5
10.2582225799561	12.029167175293	11.1108341217041	9.86244201660156	11.6993045806885	9.67810821533203	11.0901737213135	9.34842777252197	12.0617895126343	9.05014133453369	CASP4	E9PMT1;P49662
14.2745237350464	14.0687789916992	13.7671995162964	13.8352384567261	13.7819061279297	14.0955495834351	14.0551567077637	13.8754062652588	13.9184007644653	13.0606203079224	RNASEH2C	E9PN81;Q8TDP1
15.6462507247925	15.2283411026001	15.2182493209839	15.3642158508301	14.8933210372925	15.3571586608887	15.3648996353149	15.3406248092651	15.1660890579224	15.2015285491943	HSPA8	E9PN89
16.5633487701416	16.2215442657471	16.3943748474121	16.0558280944824	16.4941692352295	16.2150135040283	16.0954532623291	16.402515411377	16.1242942810059	16.2561187744141	PRCP	E9PNF7;P42785
17.4811859130859	17.4646301269531	17.1399955749512	17.3371906280518	17.4707508087158	17.3881359100342	17.4334239959717	17.8397655487061	17.2687072753906	17.5823574066162	CSRP1	E9PP21;P21291
14.8001127243042	14.6529102325439	15.3142766952515	15.1308088302612	14.8199729919434	14.8558692932129	15.130895614624	13.6766319274902	14.6274995803833	14.1017904281616	NDUFS8	E9PPW7;O00217
15.3934373855591	14.94983959198	14.7887287139893	15.0747985839844	14.3436050415039	14.9264545440674	14.9204130172729	14.9313297271729	14.7820739746094	15.0246744155884	MVB12A	E9PQA6;Q96EY5
10.800835609436	12.4392175674438	12.2357635498047	12.58069896698	12.6084451675415	12.7236309051514	12.660062789917	12.4768514633179	12.471755027771	12.1651821136475	NUF2	E9PQC4;Q9BZD4
12.9730863571167	14.2601842880249	14.4166955947876	13.6298799514771	14.7966146469116	14.4254293441772	14.729395866394	14.8398857116699	14.5085573196411	14.6841773986816	FNTA	E9PQP6;P49354
15.4556865692139	15.568736076355	15.5987138748169	15.5853328704834	15.3939981460571	15.6572513580322	15.8305778503418	15.5324735641479	15.5523843765259	15.568564414978	PFDN4	E9PQY2;Q9NQP4
19.0043773651123	18.3652610778809	18.401237487793	18.5704822540283	18.1956748962402	18.5030345916748	18.5008869171143	18.0865497589111	18.2133884429932	18.3095874786377	FAU	E9PR30;P62861
18.3195514678955	16.8876132965088	16.8652095794678	8.80896472930908	11.434796333313	15.9386205673218	8.26721286773682	11.2486743927002	13.9629096984863	13.9162530899048	MTMR9	E9PR67;Q96QG7
15.3511724472046	14.8143081665039	15.0657033920288	14.9773635864258	14.5953407287598	14.9377956390381	15.1065263748169	14.7440891265869	14.9155673980713	14.7734003067017	C11orf98	E9PRG8
15.9500274658203	15.959903717041	15.8946733474731	15.9919900894165	15.8347654342651	16.0198860168457	16.085636138916	16.0625610351563	16.0342845916748	16.0560646057129	UBXN1	E9PRQ7;Q04323
12.0763130187988	13.5788145065308	13.4062671661377	13.4411706924438	13.3709859848022	14.366626739502	13.2596530914307	13.3403882980347	12.9524116516113	13.2074527740479	FADS3	E9PS00;Q9Y5Q0
12.2462034225464	12.1130466461182	11.014684677124	12.3725576400757	11.4820365905762	12.0692100524902	11.7294445037842	11.4975547790527	12.2811374664307	12.2971725463867	FRMD8	E9PS62;Q9BZ67
2.53876566886902	13.2390394210815	6.83798837661743	10.827841758728	11.3274221420288	10.359580039978	10.8509578704834	11.3362407684326	10.1403722763062	10.3586006164551	SLC43A3	E9PS74;Q8NBI5
12.0794658660889	10.9789066314697	11.6444988250732	10.8365707397461	9.78633499145508	7.985680103302	10.7382192611694	10.1775007247925	8.40311622619629	9.76121425628662	CAST	E9PSG1
13.9605894088745	14.1324691772461	14.3228645324707	14.4794435501099	14.1244897842407	14.5689964294434	14.6234922409058	14.7611522674561	14.3488216400146	14.6946001052856		E9PSI1
12.6275014877319	12.7349643707275	12.6167802810669	12.8735914230347	12.7290353775024	12.3218326568604	12.5411901473999	12.4124269485474	12.7217044830322	12.1708393096924	TRRAP	F2Z2U4;H0Y4W2;Q9Y4A5
13.984001159668	14.0021381378174	13.8085622787476	13.8095769882202	13.6977319717407	13.6828746795654	13.7439880371094	11.1155271530151	13.6994018554688	13.2169914245605	TRMT2A	F2Z2W7;Q8IZ69
15.5248641967773	14.8080224990845	15.1338396072388	15.0247755050659	15.2673645019531	15.0504369735718	15.0506525039673	15.0967121124268	15.0972356796265	15.1580829620361	TOLLIP	F2Z2Y8;Q9H0E2
12.8875961303711	13.5977096557617	13.6592702865601	13.6839828491211	13.4111394882202	13.3875684738159	13.271954536438	13.5991315841675	13.5848989486694	13.1652526855469	PSMG4	F2Z3E0;Q5JS54
15.0017385482788	14.5374536514282	14.3553743362427	14.2884931564331	13.9681081771851	14.1763372421265	14.5226860046387	13.9086904525757	14.2208204269409	14.3484258651733	BCL7B;BCL7B;BCL7B;BCL7C;BCL7C;BCL7A;BCL7C;BCL7B	F2Z3H6;F8WDZ4;F8WE18;I3L1Q2;I3L4D5;Q4VC05;Q8WUZ0;Q9BQE9
15.4711666107178	15.8881702423096	15.7672147750854	15.652172088623	16.0400867462158	15.8970813751221	15.9567470550537	16.223445892334	16.0187206268311	16.1300716400146	PTGR1	F2Z3J9;Q14914
12.8371343612671	12.961030960083	13.156888961792	13.2976083755493	13.0452318191528	13.2407646179199	13.5432958602905	13.6387777328491	12.9388074874878	13.6832513809204	PITPNA	F5GWE5;Q00169
15.4685945510864	15.1235551834106	15.415470123291	15.0603590011597	14.8655757904053	14.8721284866333	15.2954530715942	14.9656028747559	15.0554246902466	15.0098314285278	TMEM258	F5GWH5;P61165
16.6197032928467	16.0656585693359	15.748218536377	15.9339456558228	15.8150367736816	16.0383548736572	15.9122371673584	16.3315944671631	15.8910465240479	16.050745010376	WASHC3	F5GWI9;F5GXZ7;F5GZ97;Q9Y3C0
12.5110101699829	12.9756994247437	12.2432661056519	13.0117387771606	12.3010082244873	13.2646589279175	11.6289339065552	13.0512933731079	12.650502204895	12.682671546936	SS18	F5GWN1;J3KRP6;J3KT74;J3QQM2;J3QQW2;J3QS72;Q15532;X6R3J2
14.9128522872925	15.2264614105225	15.188606262207	15.1169738769531	15.2847728729248	15.3519563674927	15.5289077758789	15.5364971160889	15.3307294845581	15.3844718933105	PSMD9	F5GX23;F5H5V4;J3KN29;O00233
16.1808376312256	15.6671018600464	15.0119743347168	16.115140914917	15.4107475280762	15.6957969665527	15.6253318786621	15.4814205169678	14.5870838165283	15.4605169296265	TRMT112	F5GX77;Q9UI30
14.61536693573	14.9507551193237	14.5763511657715	14.9247550964355	14.6348743438721	15.0251045227051	15.0206518173218	15.3999843597412	14.399959564209	14.3588724136353	ATE1	F5GXE4;O95260
15.8577213287354	15.8309555053711	15.9620180130005	15.898549079895	15.6787719726563	15.5248746871948	15.8132429122925	15.6776399612427	15.727952003479	15.6528367996216	NDUFS7	F5GXJ1;F5H5N1;O75251
17.7855834960938	17.3947143554688	16.9759979248047	17.1718654632568	17.0518646240234	17.256519317627	17.0733451843262	17.1034183502197	16.8895721435547	17.2654972076416	PTMS	F5GXR3;P20962
15.4225311279297	15.762996673584	15.5500335693359	15.8344783782959	15.8841552734375	15.9289207458496	15.4733552932739	16.2872257232666	15.7060785293579	15.9400682449341	ACTN4	F5GXS2
14.8555383682251	15.5261945724487	15.5161190032959	15.4503421783447	15.7959280014038	15.4133157730103	15.3280506134033	15.7681999206543	15.3989295959473	15.4564208984375	DAD1	F5GXX5;P61803
11.9980850219727	11.6893100738525	12.5822296142578	12.2982940673828	13.6787347793579	13.2204647064209	13.7389678955078	13.1351203918457	13.599910736084	13.4643707275391	ELP2	F5GYE9;K7ER35;Q6IA86
13.1948919296265	13.1618347167969	13.1411991119385	13.4996328353882	13.6339540481567	13.7065286636353	13.3530721664429	13.0928430557251	13.2826089859009	13.4899892807007	REXO2	F5GYG5;H0YGR4;Q9Y3B8
11.2744846343994	12.6925859451294	12.0854415893555	11.9553499221802	11.5139751434326	12.1499557495117	11.8110942840576	10.3508834838867	11.7924242019653	11.2524166107178	SDHAF2	F5GYJ5;Q9NX18
15.0234889984131	15.915620803833	15.5791349411011	15.6658611297607	16.1426811218262	15.8726215362549	15.8229532241821	15.5035371780396	15.8475313186646	15.6182956695557	OTUB1	F5GYN4;J3KR44;Q96FW1
17.5411148071289	17.2557983398438	17.2105541229248	17.3197727203369	17.1193141937256	17.0559101104736	17.1302223205566	17.21484375	17.2645015716553	17.1432571411133	ATP6V0D1	F5GYQ1;P61421;R4GN72
14.4028787612915	14.4591150283813	14.4808378219604	14.3745126724243	15.0194435119629	14.6313667297363	14.1030616760254	13.7856884002686	14.3800220489502	14.6014204025269	ALG10;ALG10;ALG10B;ALG10B;ALG10;ALG10B	F5GZZ6;F5H5T2;F8VWA9;F8VXJ0;Q5BKT4;Q5I7T1
13.1065483093262	12.4516668319702	12.5980558395386	13.2459545135498	12.629825592041	13.0914039611816	12.8084211349487	12.5226707458496	12.4868812561035	12.7025547027588	GPHN	F5H039;G3V582;H0YJ30;Q9NQX3
12.1979923248291	12.6547403335571	13.0959539413452	13.4783096313477	12.7716426849365	13.0681629180908	11.1951370239258	13.2878980636597	12.3489179611206	12.6067752838135	ANAPC5	F5H0F9;Q9UJX4
10.0888013839722	12.8691701889038	12.3928718566895	13.123345375061	12.7656450271606	12.3678607940674	12.6081047058105	13.2553987503052	12.4153280258179	13.0000448226929	GLTP	F5H0U5;Q9NZD2
14.1190900802612	13.7277460098267	13.6359987258911	13.7519445419312	13.8328294754028	13.5037288665771	13.9329996109009	14.0401620864868	13.6239194869995	13.7152585983276	PUS1	F5H1S9;G8JLB3;Q9Y606
12.4568996429443	12.9130992889404	13.0776624679565	12.9194250106812	12.5645761489868	12.3294916152954	13.4245882034302	12.7066402435303	13.0519456863403	12.4929971694946	MPDZ	F5H1U9;O75970
13.7783908843994	14.2053079605103	14.0929594039917	13.8560028076172	14.1809387207031	13.6081285476685	14.2297554016113	14.0607099533081	13.9993524551392	13.9793863296509	GOPC	F5H1Y4;Q9HD26
13.5935764312744	14.0056266784668	13.9603261947632	14.0928344726563	13.8792695999146	13.8637351989746	14.1647272109985	12.3186521530151	13.7182626724243	13.6835098266602	EOGT	F5H225;Q5NDL2
13.0080347061157	10.4545545578003	12.9883079528809	11.9413814544678	12.8188238143921	12.4111595153809	13.1054258346558	12.4451494216919	12.0832328796387	12.6124200820923	HMGA2	F5H2A4;F5H2U8;P52926
12.1146106719971	12.7887048721313	12.8272733688354	12.6307487487793	12.3388605117798	13.1867160797119	13.42564868927	13.6141862869263	13.0223150253296	12.8707208633423	NAA40	F5H2C9;Q86UY6
18.0125293731689	18.0524139404297	17.9950199127197	17.9470767974854	17.9694633483887	18.013973236084	18.0584392547607	18.1406631469727	17.9561042785645	18.0836791992188	MTHFD1	F5H2F4;P11586;V9GYY3
15.6558141708374	16.0855617523193	16.0387706756592	15.9558629989624	16.3042163848877	16.0714817047119	16.0476417541504	16.339786529541	16.1484050750732	16.2421588897705	SEC23A	F5H365;Q15436
15.9922132492065	15.9109401702881	15.7505569458008	15.8540830612183	15.694483757019	15.8249711990356	15.831618309021	15.876989364624	15.7787160873413	15.8547973632813	ALDH16A1	F5H4B6;Q8IZ83
18.303201675415	18.6173667907715	18.4535808563232	18.4382419586182	18.6652393341064	18.7052726745605	18.6430110931396	18.642635345459	18.6693363189697	18.7051086425781	NAP1L1	F5H4R6;F8VY35;F8W0J6;H0YIV4;P55209
14.5557737350464	13.9685640335083	13.8616352081299	14.2271890640259	13.3973569869995	13.9994249343872	14.5669202804565	14.1543951034546	14.3309726715088	14.2669477462769	KLHL42	F5H523;Q9P2K6
12.0905294418335	11.8823928833008	12.1917943954468	12.083083152771	11.7972373962402	11.7053661346436	12.7358102798462	11.780424118042	12.1238603591919	12.2387685775757	MAP4K3	F5H5A3;Q8IVH8
22.917911529541	23.3139228820801	22.8978481292725	23.0025405883789	23.3268165588379	23.3237438201904	23.0295257568359	23.1315860748291	23.1290798187256	23.2987728118896	TUBA1C	F5H5D3;Q9BQE3
16.9893970489502	16.8328819274902	16.8968658447266	17.0187110900879	16.8268756866455	16.9096508026123	16.7237110137939	16.7445182800293	16.8159294128418	16.6920108795166	GRSF1	F5H5I6;Q12849
15.5489864349365	15.6158275604248	15.611608505249	15.4841833114624	15.6499214172363	15.3930034637451	15.2187824249268	15.5058336257935	15.5547676086426	15.4617481231689	;BCKDHA	F5H5P2;P12694
13.2146396636963	12.3488788604736	12.7814836502075	12.4704790115356	12.5011320114136	12.8009052276611	12.8801345825195	12.440523147583	12.8436908721924	12.5131921768188	DDX55	F5H5U2;Q8NHQ9
17.0605888366699	17.0753955841064	17.1496849060059	17.0241146087646	17.1921482086182	16.8869819641113	16.9362049102783	16.992769241333	17.0999221801758	16.8708171844482	MYO1C	F5H6E2;O00159
10.7875833511353	11.4921159744263	11.4575710296631	10.0221099853516	11.9672470092773	11.4242544174194	11.0566139221191	12.3565511703491	11.3420572280884	12.4943599700928	ATL3	F5H6I7
11.2238931655884	9.99314880371094	11.770357131958	11.6639032363892	10.9627733230591	11.9749994277954	11.7757663726807	8.31688785552979	11.6212978363037	12.0323543548584	ABHD4	F5H6T0;Q8TB40
14.7075748443604	14.8149433135986	14.9022722244263	14.7231969833374	14.723819732666	14.6008958816528	14.5595798492432	14.3083810806274	14.6921167373657	14.6550807952881	MRPL48	F5H702;Q96GC5
13.8612012863159	13.8067970275879	13.7098379135132	13.7644901275635	13.381199836731	13.7444648742676	14.1351699829102	13.4716033935547	13.5778150558472	13.6126098632813	PPWD1	F5H7P7;Q96BP3
13.8903484344482	13.6165657043457	13.8267574310303	14.0687608718872	13.621711730957	13.6394748687744	13.8922452926636	12.7217435836792	13.7378311157227	13.4991941452026	C12orf43;CUSTOS	F5H7W8;Q96C57
15.779616355896	15.5561618804932	15.5135154724121	15.481276512146	15.5921306610107	15.4835433959961	15.6512184143066	15.7203674316406	15.479513168335	15.5007486343384	XRCC1	F5H8D7;P18887
15.0953922271729	14.9843788146973	15.0728616714478	15.1759328842163	15.0371170043945	15.0814437866211	15.0619449615479	15.8677625656128	15.3039560317993	15.1263084411621	ASH2L	F5H8F7;Q9UBL3
14.5114116668701	13.2977714538574	13.8195314407349	14.2332906723022	14.2858724594116	14.7513523101807	13.5394840240479	15.5464115142822	14.2944192886353	14.6373243331909	hCG_2043426;DDX19B	F6QDS0;Q9UMR2
19.0888614654541	19.0446033477783	18.436954498291	18.9133358001709	18.2867259979248	18.8735237121582	18.428897857666	18.7509326934814	18.3239345550537	18.8497009277344	DSTN	F6RFD5;P60981
16.7483539581299	16.7015647888184	16.6564407348633	16.5927238464355	16.7119159698486	16.5105628967285	16.2863655090332	16.3711185455322	16.553882598877	16.4193477630615	SIPA1	F6RY50;Q96FS4
12.7840938568115	12.9702501296997	13.7621459960938	13.1474905014038	13.5828895568848	13.0154876708984	13.3130044937134	13.2477130889893	13.7873678207397	13.5950393676758	P2RX4	F6SFZ6;Q99571
13.0672464370728	13.5080718994141	11.1394186019897	11.3534078598022	10.3107814788818	13.8755464553833	9.42608451843262	13.8427934646606	12.5471487045288	11.6912508010864	SELENOK	F6XHT0;F8WAX7;Q9Y6D0
10.1074829101563	10.764817237854	11.662036895752	10.6281576156616	11.7864770889282	11.0922050476074	11.5226001739502	11.2744789123535	10.3788766860962	9.55353736877441	ATP9B	F6XUP2;K7EPH4;K7ERE0;O43861
14.9303255081177	14.6576833724976	14.4171504974365	14.8017244338989	14.0094928741455	14.271746635437	14.2007207870483	14.1626844406128	14.389048576355	14.009331703186	CCDC59	F8VNY5;Q9P031
14.1524105072021	13.3369741439819	13.8431692123413	13.8941040039063	13.7542018890381	13.8246917724609	14.2124090194702	14.0983982086182	13.9532032012939	13.569185256958	EIF4B	F8VP89
17.0852432250977	17.0410919189453	16.9190101623535	16.8988361358643	16.9133377075195	16.8503570556641	16.8930339813232	17.0912055969238	16.908374786377	16.9006309509277	CAD	F8VPD4;P27708
15.4993133544922	15.7549915313721	15.3784227371216	15.8468132019043	15.6954641342163	15.6645288467407	15.3155422210693	15.8249111175537	15.2539520263672	15.6531963348389	TMBIM6	F8VPI1;F8VQQ5;F8VQW0;F8VR05;F8VSI7;F8VVJ4;F8VX73;F8W086;F8W1G3;F8W201;P55061
14.035083770752	13.8487768173218	14.010027885437	14.0512952804565	13.6112442016602	13.5799102783203	13.8314151763916	13.4730291366577	13.8418951034546	13.7044258117676	ZDHHC17	F8VPW2;H0YI74;H0YIK0;Q8IUH5
17.0817794799805	16.8254909515381	17.0130004882813	17.0495452880859	16.8595085144043	16.9346237182617	17.100643157959	17.1981735229492	17.0433712005615	16.9731178283691	C12orf75;OCC1	F8VQD4;Q8TAD7
9.39776515960693	8.71666240692139	12.5105094909668	12.4334964752197	12.4785146713257	12.8723125457764	12.5396041870117	12.3478565216064	12.1251811981201	10.7163782119751	METAP2	F8VQZ7
14.1458368301392	14.8338356018066	14.842734336853	14.4470481872559	15.2917785644531	14.9430913925171	15.1814527511597	15.8611755371094	15.2561073303223	15.4629688262939	PCBP2	F8VRH0
15.3897857666016	14.8761148452759	14.9882402420044	14.9253940582275	14.3946714401245	14.6365785598755	14.0481414794922	14.161470413208	14.4475040435791	14.4101552963257	GATC;;GATC	F8VRU3;H0YIV9;O43716
13.9095993041992	15.858925819397	15.6539087295532	15.3488101959229	15.9197072982788	15.4675712585449	15.8156747817993	14.5427465438843	15.7730360031128	15.6644878387451	DYNLL1	F8VRV5;F8VXL2;P63167
10.2861166000366	11.5735998153687	11.7334594726563	10.6772108078003	11.8196287155151	11.6273326873779	11.0568180084229	11.7957382202148	11.7444353103638	11.6406059265137	METTL1	F8VSD9;H0YHX0;Q9UBP6
15.1392259597778	15.1019477844238	15.3638925552368	15.4915370941162	15.8464365005493	15.4967746734619	15.504861831665	15.7652339935303	15.4676084518433	15.5939064025879	NUP37	F8VTY2;Q8NFH4
11.1767148971558	11.6097803115845	12.1155691146851	12.022611618042	12.0922632217407	11.6198873519897	12.2532720565796	11.5408906936646	12.1047229766846	11.7969779968262	BAZ2A	F8VU39;H0YII3;J3KPG5;Q9UIF9
14.8965196609497	14.372257232666	14.758960723877	14.6101455688477	14.3729114532471	14.3743906021118	14.6140956878662	14.4561052322388	14.5425996780396	14.4827699661255	CNOT2	F8VUB4;F8VV52;Q9NZN8
15.8128452301025	14.170036315918	10.1830997467041	15.7751712799072	12.0824241638184	14.0883979797363	13.5779800415039	14.4873046875	13.2046804428101	11.1329431533813	DCN	F8VUF6;F8VWU0;F8VXZ8;P07585
12.9045629501343	13.0491905212402	13.3784246444702	12.4729909896851	12.6101932525635	12.021632194519	12.7981567382813	12.6003541946411	12.9715175628662	12.8343324661255	POC1B-GALNT4;GALNT4	F8VUJ3;Q8N4A0
12.8615436553955	14.6260452270508	14.5059976577759	14.9375066757202	12.1107959747314	14.4683046340942	12.4820079803467	14.7486515045166	14.8927793502808	11.4166450500488	SLC38A2	F8VUY8;Q96QD8
16.6374416351318	16.8638496398926	17.2060375213623	16.7066421508789	17.4207592010498	16.8444404602051	17.1127090454102	16.8465518951416	17.1761684417725	16.912504196167	CD63	F8VV56;F8VWK8;F8W022;P08962
16.4441032409668	16.4652404785156	16.2096843719482	16.3752422332764	16.0498580932617	16.2366619110107	16.2688159942627	16.1466178894043	16.3222274780273	16.387508392334	COPZ1	F8VVA7;P61923
15.0838499069214	15.341064453125	15.2239456176758	15.2112855911255	15.6075296401978	15.1386890411377	15.1202335357666	15.0677032470703	15.2821731567383	15.1650648117065	COQ5	F8VVX6;Q5HYK3
13.7057428359985	13.6024055480957	14.0305366516113	14.1787157058716	13.6100463867188	13.3660573959351	13.7933893203735	13.4583787918091	13.7191047668457	13.6324501037598	TPCN1	F8VVY9;F8VZZ6;F8W0P9
17.8625202178955	16.9480895996094	16.0698413848877	16.8054447174072	17.2247848510742	17.2481060028076	16.0196323394775	16.1167678833008	16.5088691711426	16.1482067108154	SCAF11	F8VXG7;Q99590
17.3461303710938	16.6929092407227	16.9770565032959	16.909761428833	16.8747291564941	16.6834564208984	17.0512866973877	16.8852272033691	16.8802814483643	16.7213268280029	CNPY2;;CNPY2	F8VXJ7;F8W031;Q9Y2B0
11.3631620407104	11.7963237762451	11.0457763671875	12.1258449554443	9.70737838745117	12.1885147094727	11.6028280258179	10.5320320129395	11.6600437164307	11.1160116195679	CHST11	F8VXK3;Q9NPF2
13.546441078186	13.3337411880493	13.3439788818359	13.3816022872925	13.4669733047485	12.9881610870361	12.6319398880005	13.4147253036499	13.3611717224121	13.5233974456787	ZCRB1	F8VXY6;G3V1V1;Q8TBF4
17.3284378051758	16.8627643585205	16.8952598571777	17.1161441802979	16.4493274688721	16.644157409668	16.6764869689941	16.5795135498047	16.4536666870117	16.7589206695557	PPP1CC	F8VYE8;P36873
14.1682243347168	14.4139986038208	14.5302658081055	14.4113597869873	14.7507886886597	14.6725273132324	14.5942764282227	14.8154859542847	14.5677824020386	14.663384437561	PRKAG1	F8VYY9;P54619
13.6234159469604	14.3214683532715	14.5064172744751	14.5403566360474	14.4143114089966	14.2481813430786	14.7318325042725	14.1326684951782	14.3418464660645	13.6564702987671	PCBP2	F8VZX2
16.1029491424561	15.8310413360596	15.8536558151245	15.8949222564697	15.9149770736694	15.8924865722656	15.8476362228394	15.9359683990479	15.8371143341064	15.9791164398193	C17orf49;BAP18	F8W038;Q8IXM2
14.5915508270264	14.0272665023804	14.3240642547607	14.154354095459	13.7211637496948	13.7111740112305	13.9365568161011	14.2443180084229	13.8394823074341	13.9253597259521	NUBPL	F8W061;H0YHR7;Q8TB37
13.3506374359131	12.7315216064453	12.79465675354	12.9092721939087	12.5030355453491	12.6512308120728	12.8060865402222	12.7246494293213	12.609169960022	12.4252262115479	YEATS4	F8W0J4;O95619
16.6312713623047	15.8769493103027	15.9266490936279	16.0295352935791	15.7640151977539	15.6228876113892	15.9627046585083	15.4051179885864	15.8779935836792	15.9061632156372	ATP5F1B	F8W0P7
14.242392539978	13.9990692138672	14.5443668365479	14.2052745819092	14.098783493042	13.724871635437	14.4294767379761	14.0729722976685	14.1055660247803	13.8696889877319	PPHLN1	F8W0Q9;Q8NEY8
18.67311668396	18.093729019165	18.2023410797119	18.3647441864014	17.937780380249	17.9499626159668	17.9673938751221	17.7339897155762	17.7893619537354	17.8477973937988	AK2	F8W1A4;P54819
13.3678045272827	13.2302799224854	12.1697797775269	13.5176982879639	12.5537986755371	13.0004844665527	12.8387136459351	8.36674213409424	12.8360729217529	12.6887302398682	ACAD10	F8W1I9;Q6JQN1
18.7050437927246	18.3144493103027	18.053409576416	18.6178321838379	17.1273956298828	18.1823577880859	17.9915237426758	14.6301050186157	13.1945877075195	17.4683990478516	KRT74	F8W1S1;Q7RTS7
16.003490447998	15.2535533905029	15.2251768112183	15.3702907562256	15.2079916000366	15.5141067504883	15.5654764175415	15.4873895645142	15.1395502090454	15.3782386779785	NAP1L1	F8W543
16.5479526519775	16.2373447418213	16.4441184997559	16.3844871520996	16.4101581573486	16.4052295684814	16.5206813812256	16.3376693725586	16.4691696166992	16.4947948455811	BABAM2	F8W733;Q9NXR7
17.4843616485596	16.4314002990723	15.9317674636841	16.7726650238037	14.8314294815063	16.6451721191406	16.1814918518066	12.8176889419556	15.3272285461426	15.8972501754761	RPL10	F8W7C6
16.0402793884277	15.9995899200439	15.8752183914185	16.0562076568604	16.1485939025879	15.8459558486938	15.3309097290039	15.7538404464722	15.8666343688965	15.808687210083	FAM162A	F8W7Q4;Q96A26
15.9511165618896	15.940526008606	15.9336891174316	15.959189414978	15.8195972442627	15.9481353759766	16.060022354126	15.9928951263428	15.9515142440796	16.002025604248	WASHC2A	F8W7U3;Q641Q2
15.2268409729004	15.1091785430908	15.2537431716919	15.150541305542	15.0821189880371	14.9786548614502	15.2081623077393	14.9138441085815	15.0487833023071	14.9211759567261	MRE11	F8W7U8;P49959
14.6854076385498	14.5325937271118	14.3561000823975	14.5701961517334	14.1417713165283	14.3676853179932	14.5502042770386	14.7499189376831	14.4834318161011	14.6118860244751	FAM120C	F8W881;Q9NX05
12.6583690643311	13.221155166626	12.0970888137817	12.8818254470825	13.1896886825562	13.1070079803467	12.632604598999	12.6077060699463	12.9816837310791	12.9921112060547	SLBP	F8W8D3;Q14493
17.7175025939941	17.5875358581543	17.7339725494385	17.5203914642334	17.6471862792969	17.6275119781494	17.3757839202881	17.8174266815186	17.4544620513916	17.6214027404785	TIA1	F8W8I6;P31483
15.4927082061768	15.9699726104736	13.9124250411987	14.7091522216797	15.6623668670654	15.0612077713013	13.7061386108398	12.9814033508301	14.6008081436157	13.6279392242432	RTN4	F8W914
16.6663856506348	16.7263202667236	16.7215518951416	16.6783123016357	16.8709983825684	16.8077392578125	16.6833248138428	16.9984283447266	16.8126811981201	16.7836265563965	IGF2BP2	F8W930;Q9Y6M1
14.8417520523071	15.3994159698486	15.419792175293	15.3727798461914	15.2426147460938	15.2726240158081	15.5078897476196	15.4933128356934	15.3469762802124	15.330849647522	GAPVD1	F8W9S7;Q14C86
14.2063684463501	14.5205535888672	14.5769758224487	14.4018220901489	14.5923357009888	14.7046327590942	14.6470394134521	14.7611865997314	14.6723289489746	14.710542678833	CCDC93	F8W9X7;Q567U6
8.40747833251953	10.5426645278931	12.0209665298462	11.4619913101196	11.639594078064	10.8061323165894	11.1424503326416	11.193305015564	10.5964183807373	11.3256254196167	DDX31	F8WAJ0;Q9H8H2
15.3574171066284	15.5095138549805	15.5253973007202	15.195743560791	14.3671998977661	15.2064838409424	15.0266828536987	15.0723037719727	15.3813695907593	14.4324855804443	VAMP2;VAMP2;;VAMP2	F8WCA0;J3QRU4;L7N2F9;P63027
13.5134344100952	13.0553598403931	13.1416501998901	12.8922100067139	13.0257844924927	12.5989360809326	12.9975862503052	12.3345994949341	13.0981998443604	13.0121431350708	RNF149	F8WCD0;Q8NC42
16.4073619842529	16.1657867431641	16.3213272094727	16.3908863067627	16.229455947876	16.2682838439941	16.1111316680908	16.0551490783691	16.0749893188477	15.9998092651367	SEC62	F8WCJ7;F8WF48;Q99442
13.8987131118774	13.0167055130005	13.0816116333008	12.9306335449219	12.2544851303101	12.0727310180664	12.5824661254883	12.6617488861084	12.8811073303223	12.6901235580444	ZNF687	F8WCX2;H0Y5I5;Q8N1G0
14.5074186325073	14.5031728744507	14.4149827957153	14.5344314575195	14.3918914794922	14.5495042800903	14.4509239196777	14.2985868453979	14.4251165390015	14.5149726867676	MYO5A	F8WE88;Q9Y4I1
13.5996074676514	14.16286277771	14.8379936218262	12.8535137176514	11.8719501495361	12.4854145050049	14.3865175247192	10.0973463058472	14.0373611450195	10.5326175689697	ESS2	F8WEF8;Q96DF8
17.9235897064209	17.9241123199463	18.0448150634766	17.9730224609375	17.8702335357666	18.0242614746094	18.0749568939209	17.3150844573975	18.0063896179199	17.859058380127	CLTA	F8WF69;P09496
16.7511768341064	16.6321887969971	16.7169189453125	16.6934394836426	16.7466468811035	16.5655689239502	16.6236171722412	16.6798229217529	16.7758293151855	16.6284942626953	CPSF6	F8WJN3;Q16630
15.7174587249756	15.8305816650391	15.987003326416	15.7959976196289	15.9772682189941	15.6160144805908	15.7589120864868	15.8486051559448	15.8722724914551	15.7291860580444	NDUFV1	G3V0I5;P49821
13.2095384597778	13.4840087890625	13.8027620315552	13.7758550643921	13.5211162567139	14.0756721496582	13.3462104797363	13.3149662017822	13.7079544067383	13.5758895874023	B3GAT3	G3V150;O94766
11.8984289169312	13.3021392822266	13.1576910018921	13.1373882293701	13.1039447784424	13.2604141235352	13.0554285049438	8.70363903045654	13.030481338501	12.5605697631836	PARP2	G3V167;H0YH02;Q9UGN5
17.7946319580078	18.0409240722656	17.9661331176758	17.9092350006104	17.9496898651123	18.0085945129395	18.1081275939941	18.1619644165039	18.0226287841797	18.1181526184082	DPP3	G3V180;G3V1D3;Q9NY33
15.8935832977295	15.8185434341431	15.5255060195923	15.7368812561035	15.1883859634399	15.5399417877197	15.8012475967407	15.7374057769775	15.523138999939	15.7775897979736	GSDMD	G3V1A6;P57764
13.1856956481934	13.8852500915527	13.8857707977295	13.8740406036377	14.1514139175415	13.5752229690552	13.9655685424805	13.407603263855	13.8046016693115	13.6711549758911	MED15	G3V1P5;Q96RN5
13.9309349060059	14.0398759841919	14.0609769821167	13.8321933746338	13.890739440918	13.9175081253052	14.0438327789307	13.8067760467529	13.9145336151123	13.9044647216797	DENND5B	G3V1S3;Q6ZUT9
14.0019483566284	14.2052774429321	14.1426334381104	14.9065284729004	14.9939470291138	14.5174083709717	13.9076499938965	14.2800388336182	14.4512805938721	14.2845554351807	FCF1	G3V1S4;G3V5S9;Q9Y324
14.5791826248169	14.6453485488892	14.6540584564209	14.7161655426025	14.6139945983887	14.4826698303223	14.4668207168579	10.1772060394287	14.0562782287598	13.932240486145	GOLT1B	G3V1U5;Q9Y3E0
14.2030353546143	14.2950124740601	14.4881038665771	14.6215133666992	13.952841758728	13.9350538253784	14.8148822784424	13.1090431213379	14.2979125976563	14.280200958252	ZFP36L1	G3V2D5;G3V2P5;G3V515;Q07352
12.7536754608154	13.5891933441162	13.8864221572876	13.9682121276855	13.7109613418579	13.5522747039795	14.2444105148315	14.0298109054565	13.6750650405884	13.8896064758301	ACYP1	G3V2U7;P07311
15.870361328125	16.0624618530273	16.0139083862305	16.0544338226318	16.1266498565674	16.0907382965088	16.1188182830811	16.1817302703857	16.2148857116699	16.1353969573975	APEX1	G3V3M6;P27695
14.9030895233154	14.7213659286499	14.698802947998	14.5419588088989	14.7861776351929	14.6843166351318	15.0298042297363	15.1236028671265	14.7280387878418	14.6477508544922	;PTGR2	G3V3Y1;Q8N8N7
13.7406244277954	14.733491897583	14.526743888855	14.6852836608887	14.7297554016113	14.9105539321899	15.0181818008423	15.2830867767334	14.7901983261108	15.0549774169922	GNPNAT1	G3V4W4;Q96EK6
16.2219524383545	16.2096176147461	12.0890598297119	16.2578792572021	16.1469287872314	15.4817571640015	13.2075853347778	15.8162221908569	12.7341947555542	10.8687925338745	KTN1	G3V4Y7
15.0273380279541	14.5975694656372	14.6215705871582	14.6486625671387	14.2334032058716	14.2897338867188	14.3733587265015	14.2398376464844	14.3485727310181	14.1645383834839	ALDH6A1	G3V4Z4;Q02252
15.7860374450684	15.575478553772	15.8246231079102	15.7191200256348	15.6958494186401	15.6908702850342	15.6921443939209	15.6628847122192	15.5284290313721	15.5692272186279	DDX24	G3V529;Q9GZR7
11.6909599304199	13.3281888961792	13.450098991394	13.6294441223145	13.5657167434692	12.9695472717285	13.4059505462646	13.6248445510864	13.2982873916626	13.4801988601685	FAM177A1	G3V583;Q8N128
13.8204784393311	13.4183149337769	14.1971759796143	14.1415243148804	13.6451988220215	13.853289604187	14.1505718231201	13.4872102737427	13.8226165771484	13.931736946106	MIA2	G3V599;Q96PC5
13.6347713470459	13.8395738601685	13.9592065811157	13.6141939163208	13.9579267501831	13.9882717132568	13.8675622940063	13.6855087280273	13.9517984390259	13.9609317779541	CCNK	G3V5E1;O75909
15.8512353897095	16.0733623504639	16.0361957550049	15.9099283218384	15.9217224121094	16.0122089385986	16.0862560272217	15.9787197113037	15.9039859771729	16.021900177002	KLC1	G3V5R9
16.038366317749	16.7151679992676	16.566234588623	16.5959148406982	16.7421360015869	16.9532032012939	16.8130168914795	16.5927104949951	16.6055335998535	16.6479644775391	CDK2	G3V5T9;P24941
18.343713760376	18.5171985626221	18.5433006286621	18.4919986724854	18.5898170471191	18.5935916900635	18.4546871185303	18.5725154876709	18.502571105957	18.6339511871338	PSMA6	G3V5Z7;P60900
12.4136457443237	13.1561756134033	13.9648818969727	13.712215423584	13.3214769363403	12.9205904006958	13.6181135177612	12.9049682617188	13.4717445373535	13.1773824691772	ZNF512	G3XAG1;Q96ME7
14.2163963317871	14.3599691390991	14.6398878097534	14.2510967254639	14.6590118408203	14.5301742553711	14.8535804748535	15.0043449401855	14.7389554977417	14.6753025054932	PAPOLA	G3XAH6;P51003
15.3235960006714	15.1737842559814	15.3206434249878	15.4035444259644	15.1569948196411	15.2161979675293	15.2632312774658	15.2221069335938	15.2719125747681	15.1049451828003	SLC12A2	G3XAL9;P55011
13.6981945037842	14.3314800262451	13.8821601867676	13.8687620162964	13.8193998336792	12.7838907241821	13.467679977417	9.27297401428223	13.3496265411377	13.4217071533203	INTS9	G3XAN1;Q9NV88
14.80042552948	14.9061164855957	15.255313873291	14.8908500671387	15.2804012298584	14.5794639587402	14.7742671966553	14.60009765625	14.8212423324585	14.5668325424194	TRAM1	G3XAN4;Q15629
14.7078828811646	14.3606719970703	14.3108825683594	14.5166282653809	14.1420192718506	14.1926422119141	14.2304430007935	14.1143131256104	14.1877994537354	14.2177953720093	BLOC1S5;BLOC1S5-TXNDC5;BLOC1S5	G5E931;H3BN57;Q8TDH9
13.0378103256226	12.8040723800659	13.3059005737305	13.2895927429199	12.9856386184692	12.8397436141968	13.2222719192505	13.4872512817383	13.1784429550171	13.0767784118652	GPR107	G5E994;Q5VW38
15.0967645645142	15.198335647583	15.1550741195679	15.2518815994263	14.9446964263916	15.1877012252808	15.0735025405884	15.1639261245728	15.0594596862793	15.2601804733276	CPSF3	G5E9W3;Q9UKF6
13.5174493789673	13.0249357223511	13.0507593154907	13.2269449234009	12.6362857818604	12.742826461792	13.0777044296265	13.2486782073975	12.8247327804565	12.9225912094116	APBB2	G5E9Y1;H0YAJ5;Q92870
9.22797679901123	11.1144285202026	11.079083442688	10.5792922973633	10.7783651351929	9.84284496307373	11.3089542388916	7.75630903244019	11.5744791030884	11.0554037094116	PI4K2B	G5E9Z4;Q8TCG2
15.6863288879395	15.3757581710815	15.2961473464966	15.2848300933838	15.3317804336548	15.1589241027832	15.1264591217041	15.1565713882446	15.1285514831543	14.9138031005859	MRPS27	G5EA06;Q92552
16.0476512908936	16.2586269378662	16.2808647155762	16.3774356842041	16.2926807403564	16.3783512115479	16.0388507843018	16.1232566833496	16.3104076385498	16.2551937103271	CELF1	G5EA30;Q92879
15.3732013702393	15.8478221893311	15.9874505996704	15.8629446029663	15.9963579177856	15.9722700119019	16.0970611572266	16.4212741851807	16.0851573944092	16.1091365814209	SEC24C	G5EA31;P53992
12.9610576629639	13.2783432006836	13.6768846511841	13.8406267166138	13.955099105835	14.2828664779663	13.6914806365967	13.8675832748413	13.800386428833	13.469521522522	CDC27	G5EA36;P30260
13.8743276596069	13.7342119216919	13.1780223846436	13.3746767044067	13.9643526077271	13.5831356048584	12.3113737106323	13.2319898605347	12.7725944519043	13.5560207366943	PTPRS	G8JL96;Q13332
20.307201385498	19.9401245117188	19.8255748748779	19.9263935089111	19.9135608673096	19.8663234710693	19.7883377075195	20.1258106231689	19.8145084381104	19.8400917053223	HNRNPH1	G8JLB6;P31943
12.1675472259521	12.3669328689575	12.9093980789185	12.2620840072632	12.558162689209	11.7632703781128	12.3797779083252	12.3804054260254	11.6590538024902	12.1436128616333	USE1	G8JLK1;M0QYT5;Q9NZ43
13.4248809814453	13.1676549911499	13.3162431716919	13.6083011627197	13.554949760437	13.2942228317261	13.8015689849854	12.5511827468872	13.3047075271606	13.0872993469238	BLOC1S1	G8JLQ3;P78537
13.9268074035645	13.9978675842285	14.2745161056519	14.2628498077393	14.1283359527588	14.2907047271729	14.1558799743652	14.3728485107422	14.358437538147	14.3558883666992	NELFCD	H0UI80;Q8IXH7;X6RLT1
16.3541278839111	16.4191646575928	16.4610748291016	16.350549697876	16.4063968658447	16.3475704193115	16.2016754150391	16.3702125549316	16.2297420501709	16.2608585357666	DPM1	H0Y368;O60762;Q5QPK2
13.395359992981	13.3690156936646	13.0970859527588	13.2657527923584	13.1925268173218	12.9819021224976	13.8035850524902	12.9352827072144	13.2272930145264	12.5751581192017	RBM33	H0Y3K4;Q96EV2
10.3260822296143	9.59170436859131	11.4929628372192	10.7924346923828	9.78841590881348	10.7761344909668	10.4175214767456	11.4314813613892	11.1389236450195	10.0277118682861	NF1	H0Y465;J3KSB5;P21359
12.5433721542358	13.6163568496704	12.8837795257568	12.5711297988892	13.5539779663086	13.0211210250854	13.3846998214722	13.3144645690918	13.0466060638428	12.2598400115967	GTF3C2	H0Y4Q6;Q8WUA4
14.0435409545898	14.9376983642578	15.1869878768921	15.2644557952881	15.0957231521606	14.4279336929321	15.6597099304199	14.7676239013672	15.149302482605	15.1944761276245	COMMD3	H0Y4W0;Q9UBI1
14.9602766036987	14.9726638793945	14.9083232879639	15.1217212677002	14.9526605606079	14.9913482666016	14.9976768493652	14.9255332946777	14.8954849243164	14.9204578399658	EPB41L2	H0Y5B0
0.270518898963928	6.86522531509399	9.12650680541992	6.92977905273438	8.88563919067383	7.8090443611145	10.1880111694336	8.45363521575928	9.60377502441406	8.82885074615479	CD44	H0Y5E4
11.7582998275757	12.7274703979492	12.9467687606812	12.955023765564	12.9758796691895	12.6790885925293	13.1438684463501	12.3341903686523	13.0075988769531	12.6252546310425	AFG1L	H0Y5F4;Q8WV93
14.5574569702148	14.3159847259521	14.4705591201782	14.69948387146	14.0863809585571	13.7332410812378	14.306809425354	13.47727394104	14.2456521987915	14.2902317047119	PRXL2C	H0Y5J5;Q7RTV5
15.8302774429321	15.4524803161621	15.4813117980957	15.4100732803345	15.456446647644	15.5023012161255	15.1668844223022	15.3123292922974	15.5190401077271	15.392240524292	ERGIC3	H0Y5K5;Q9Y282
13.3225145339966	13.2592067718506	13.350076675415	12.9081687927246	13.3050708770752	13.0642871856689	13.28737449646	12.943902015686	13.2950830459595	12.5050554275513	TRIM33	H0Y612;Q9UPN9
15.8381080627441	16.2840938568115	15.9734325408936	16.0482692718506	16.3659706115723	16.3442764282227	16.4733123779297	16.9575443267822	16.5928363800049	16.6606044769287	UFM1	H0Y614;P61960
13.557933807373	12.7987489700317	13.4726533889771	13.0161991119385	13.3200874328613	13.8171501159668	13.7234506607056	12.7486371994019	13.2819776535034	13.5080251693726	ARFGAP3	H0Y6A0
12.6381607055664	12.3604612350464	12.4760322570801	12.2580108642578	12.0052690505981	12.2546548843384	12.1736783981323	13.0056247711182	11.9860067367554	12.2737283706665	KDM1B	H0Y6H0;Q8NB78
12.4371395111084	12.7177858352661	11.7543687820435	12.7549896240234	13.1389465332031	12.9731559753418	12.1716651916504	13.3783283233643	12.5264472961426	12.6549482345581	FBXL18	H0Y6I6;Q96ME1
14.2183990478516	14.0458955764771	14.633111000061	13.9911127090454	13.9749279022217	13.9365787506104	14.090521812439	13.9243354797363	13.5775966644287	13.899320602417	ZNF185	H0Y704
13.3031272888184	13.3362760543823	13.1556081771851	13.3390979766846	13.015944480896	13.1395177841187	13.2991008758545	13.2431201934814	13.1397705078125	13.1513223648071	TNRC6B	H0Y720
15.7399387359619	15.5979919433594	15.2995367050171	15.4635152816772	15.5090103149414	15.1513700485229	15.7147874832153	14.923246383667	15.0609197616577	15.2156658172607	CCDC186	H0Y7V5;Q7Z3E2
11.9486026763916	12.9080657958984	13.1205577850342	13.006799697876	12.9582939147949	12.8641185760498	13.3203268051147	13.4349603652954	13.0713033676147	13.3699712753296	FNBP1	H0Y7W6;Q96RU3
15.5880670547485	14.993691444397	14.9980487823486	14.8941078186035	14.4174509048462	14.4168195724487	14.9924230575562	14.5332021713257	14.7834358215332	14.7683191299438		H0Y858
14.8172044754028	16.4488849639893	16.225643157959	16.3165645599365	16.8231544494629	15.9962396621704	16.1193237304688	16.0043640136719	16.4348526000977	16.239501953125	MTCH1	H0Y8C3;Q9NZJ7
19.2878761291504	19.39040184021	19.4980525970459	19.3154487609863	19.4406356811523	19.3798923492432	19.413782119751	19.0127773284912	19.4673252105713	19.2251377105713	HNRNPD	H0Y8G5;Q14103
14.369194984436	15.5333051681519	15.2311458587646	15.2660055160522	15.4384059906006	14.9899597167969	15.5285634994507	14.1783800125122	15.3681659698486	15.31369972229	DNPH1	H0Y8X4;O43598
12.867938041687	13.2239007949829	13.3167552947998	13.4078140258789	13.2149858474731	13.3066349029541	13.3511819839478	13.3760461807251	13.4841651916504	13.5785694122314	NEDD4	H0Y8X6;P46934
16.4336948394775	16.764497756958	16.8104419708252	16.67236328125	17.1700859069824	16.783031463623	16.7445793151855	17.0944709777832	16.8771324157715	16.8690738677979	COPB2	H0Y938;H0YAC7;P35606
15.9226694107056	16.1518211364746	15.7654266357422	16.0146102905273	16.1023178100586	16.1540775299072	16.1954765319824	16.5416698455811	16.0430374145508	16.3452434539795	PGM3	H0Y987;O95394
15.0153245925903	14.5152339935303	14.7492294311523	14.8471994400024	14.4841556549072	14.6970653533936	14.6196546554565	14.5303764343262	14.5470504760742	14.6565704345703	TXNDC15	H0Y997;Q96J42
17.1148777008057	16.2638835906982	16.3921375274658	16.4195709228516	16.1031494140625	15.9836130142212	16.133882522583	16.4501857757568	16.4391078948975	16.3314208984375	AGA	H0Y9C7;P20933
13.3308210372925	13.4879417419434	13.8449811935425	13.6050882339478	13.6003942489624	13.8551435470581	13.8167295455933	13.3486766815186	13.702766418457	13.6510534286499	TMA16	H0Y9X1;Q96EY4
15.4290866851807	15.0202903747559	15.006685256958	15.1785774230957	14.6280517578125	14.9627237319946	14.8898620605469	14.9617490768433	14.9509353637695	14.9243440628052	C5orf24	H0YAE0;Q7Z6I8
13.9553623199463	14.4126396179199	14.5103693008423	14.536376953125	14.6282968521118	14.6370983123779	14.5456323623657	14.6098480224609	14.5467329025269	14.6694421768188	ARHGEF10	H0YAN8;O15013
12.6018943786621	11.7754354476929	11.8909521102905	12.5704660415649	12.6406173706055	12.4716758728027	12.6907453536987	13.0106134414673	12.6962823867798	12.6535196304321	CLU	H0YAS8;H0YC35;P10909
12.1218662261963	10.7094078063965	12.7962369918823	12.7490224838257	12.1933279037476	11.8872814178467	12.6481256484985	11.0794591903687	12.2783327102661	11.8519315719604	DGLUCY	H0YB09;H0YB11;H0YB62;Q7Z3D6
10.8797960281372	12.1877384185791	11.3186302185059	11.8429565429688	11.5098085403442	11.1348009109497	10.1412115097046	11.917875289917	12.1327095031738	12.4492168426514	BNIP3L	H0YBC7;O60238
12.7640695571899	12.10915184021	12.8425636291504	11.8009166717529	12.9016408920288	12.5547857284546	12.8086910247803	12.4937791824341	12.4959392547607	12.5450630187988	MTUS1	H0YC63;Q9ULD2
13.821084022522	13.6155853271484	14.0064344406128	13.6323442459106	14.0863218307495	13.6453504562378	14.0724487304688	14.1088676452637	13.9412221908569	13.8643474578857	LAMP2	H0YCG2
13.2938432693481	12.5269222259521	13.2569885253906	13.0796995162964	13.196174621582	12.3427362442017	13.150336265564	13.0351085662842	12.949779510498	12.9694051742554	TMEM63B	H0YCP6;H3BLW6;Q5T3F8
14.5082426071167	14.8630685806274	14.5364866256714	14.6551694869995	14.5176420211792	14.4302215576172	14.6319704055786	14.8291168212891	14.6392545700073	14.8149490356445	TKFC	H0YCY6;Q3LXA3
10.0688552856445	8.82082080841064	9.47729682922363	11.3800363540649	8.19874668121338	10.7824306488037	12.159348487854	10.66455078125	11.4269180297852	12.1395225524902	KNL1	H0YCZ2;Q8NG31
13.3364200592041	13.6253137588501	14.0073099136353	13.8342447280884	13.2845678329468	13.4462032318115	14.0399312973022	14.2561254501343	14.0758571624756	14.0504150390625	PICALM	H0YD48;H0YE97;H0YEY8
12.0019979476929	12.9449310302734	12.6338548660278	12.7766418457031	12.7137784957886	12.877347946167	13.0163412094116	12.8861265182495	12.8761835098267	12.7383947372437	RUFY2	H0YD93;Q8WXA3
15.2602014541626	14.8877544403076	15.1677627563477	15.1267023086548	14.9148473739624	14.8470315933228	15.0154581069946	14.7605676651001	14.948468208313	14.8328847885132	STIM1	H0YDB2;Q13586
20.5087413787842	20.4524326324463	20.3903255462646	20.4765510559082	20.3660755157471	20.3798122406006	20.2848453521729	20.338207244873	20.3236980438232	20.3404407501221	PLEC	H0YDN1
16.5927963256836	16.8153095245361	16.6130714416504	16.5950241088867	16.8631019592285	16.8590469360352	16.7512035369873	17.3135356903076	16.7554187774658	16.7961483001709	EIF3F	H0YDT6;O00303
15.854115486145	15.8331804275513	15.8887701034546	16.0423278808594	15.8075742721558	15.9090051651001	15.9287166595459	16.067985534668	15.8019104003906	16.0227031707764	PPP5C	H0YDU8;P53041
14.8747873306274	14.0037717819214	14.175012588501	14.7026786804199	14.239447593689	14.1463298797607	14.0796909332275	13.8896055221558	14.1255855560303	14.400279045105	MSRB2	H0YE51;Q9Y3D2
12.6999473571777	12.4687881469727	13.2799034118652	12.9457550048828	12.9048585891724	12.5351457595825	12.5198307037354	12.8255567550659	12.5737047195435	12.8012018203735	TEAD1	H0YE88;P28347
13.9928760528564	13.4403133392334	13.8198308944702	13.4654159545898	13.6650085449219	13.1505374908447	13.5295305252075	13.9083414077759	13.5431509017944	13.6183767318726	NARS2	H0YEL9;Q96I59
11.4698247909546	10.8094596862793	11.728684425354	11.1917743682861	10.894326210022	11.2553806304932	11.3098745346069	10.8295183181763	11.5476856231689	11.0598039627075	RSF1	H0YER1;Q96T23
14.0472869873047	14.6212110519409	13.9391088485718	13.1737089157104	14.4136276245117	14.1962394714355	13.6959743499756	14.3688592910767	14.349175453186	14.4008779525757	LRRK1	H0YEW1;Q38SD2
19.012580871582	19.0089054107666	18.8414478302002	18.9841976165771	18.8347682952881	18.9989166259766	19.2426280975342	19.4569396972656	19.0129489898682	19.2248077392578	CRIP2	H0YFA4;P52943
18.6618995666504	18.5430469512939	18.7214870452881	18.6174049377441	18.706485748291	18.5448513031006	18.4440383911133	18.7903003692627	18.6488780975342	18.5319995880127	HADHA	H0YFD6;P40939
12.2154998779297	12.106146812439	12.7461948394775	12.3834247589111	12.4430265426636	12.0937767028809	12.9414882659912	12.140118598938	12.2248229980469	12.8036184310913	TRIM65	H0YGS7;Q6PJ69
11.5562200546265	11.2249937057495	12.2293558120728	10.6761026382446	11.1886425018311	11.1385927200317	11.6419878005981	11.8454942703247	11.5726375579834	11.2155876159668	BRMS1L	H0YHD0;Q5PSV4
14.2362537384033	14.2591552734375	14.6496858596802	14.4575080871582	14.6668100357056	14.7292261123657	14.9482698440552	14.3766536712646	14.5799446105957	14.5034017562866	ANKRD13A	H0YIN8;Q8IZ07
15.2917814254761	15.539755821228	15.3808288574219	15.2187213897705	15.7772693634033	15.534613609314	15.3228101730347	15.4988317489624	15.3683948516846	15.5330848693848	PPP2R5C	H0YJ75;Q13362;Q96B13
0.365410417318344	10.2521228790283	12.841157913208	8.70825099945068	12.9934492111206	12.1935710906982	12.285080909729	10.6089773178101	12.7971620559692	11.9118680953979	PIP4P1	H0YJ90;Q86T03
14.5915899276733	15.3010969161987	15.0025520324707	15.0328330993652	15.2835102081299	15.0816469192505	15.1876525878906	15.1554307937622	15.2388639450073	15.397931098938	STAT6	H0YJH6;P42226
14.2748279571533	14.9302167892456	13.9563426971436	14.1525478363037	14.7067365646362	14.5080699920654	14.6816453933716	11.1602544784546	10.7876205444336	13.1197891235352	DHRS2	H0YJP4
14.7946710586548	14.7377080917358	14.5443859100342	14.6570472717285	14.780385017395	14.6837968826294	14.7661876678467	14.683837890625	14.5484342575073	14.7996473312378	YY1	H0YJV7;P25490
14.1664924621582	14.1957426071167	14.3544187545776	14.4090213775635	14.4584970474243	14.0715475082397	14.2851982116699	14.2196245193481	14.1915493011475	13.9279174804688	EMC4	H0YK61;H0YNK0;H0YNK8;Q5J8M3;S4R329
15.3129301071167	15.4579524993896	15.3848905563354	15.388765335083	15.3604564666748	15.5018692016602	15.2271184921265	15.3475542068481	15.3583650588989	15.4120693206787	SPG21	H0YKB0;H0YKM6;H0YLD7;H0YLT5;H0YLW1;H0YMB7;H0YML6;Q9NZD8
18.6066646575928	18.4060344696045	18.1131076812744	18.3801517486572	18.4576168060303	18.4228363037109	17.9297428131104	17.9281044006348	17.9942512512207	18.0762138366699	RPL28	H0YKD8;H0YMF4;P46779
14.5914611816406	14.4182415008545	14.9251070022583	14.9799642562866	14.1879920959473	14.369743347168	14.5646162033081	14.6088619232178	14.3617925643921	14.4049377441406	CIAO2A	H0YKV4;Q9H5X1
13.3998613357544	12.116491317749	13.1708478927612	11.6168336868286	13.0673494338989	12.4088764190674	12.3655786514282	11.7572841644287	11.6924200057983	12.3224096298218	RABGGTA	H0YLH3;Q92696
13.2535934448242	13.2844696044922	13.3620128631592	13.1959972381592	13.3664331436157	12.8920021057129	13.414888381958	13.5865659713745	13.2697048187256	13.23681640625	CDC42BPB	H0YLY0
14.1801519393921	14.1809110641479	14.2467365264893	14.3594722747803	14.2540636062622	14.2997846603394	14.386360168457	14.3613195419312	14.4258298873901	14.1517744064331	ANKRD17	H0YM23;O75179
22.4281558990479	22.3248805999756	22.1728496551514	22.2875938415527	22.2676067352295	22.3260955810547	22.2147350311279	22.3343753814697	22.1934509277344	22.3343601226807	ANXA2	H0YMW4;P07355
17.9547996520996	17.8438282012939	17.8944549560547	18.0405902862549	17.7532348632813	17.8431415557861	18.0778179168701	17.5209541320801	17.7841262817383	17.9303359985352	ANP32A	H0YN26;P39687
14.2318468093872	13.9543771743774	13.9077243804932	13.9876737594604	13.956919670105	14.0079917907715	13.7625150680542	13.6875886917114	13.9311475753784	13.5847492218018	CHST14	H0YN65;Q8NCH0
15.7233295440674	15.8766632080078	16.0704402923584	15.874490737915	16.0762481689453	15.9523010253906	15.8494424819946	16.3212890625	15.9245624542236	15.9493045806885	WDR61	H0YN81;Q9GZS3
12.5529365539551	13.7433061599731	12.2374820709229	13.486988067627	13.2915458679199	13.1274347305298	11.8967418670654	12.8836326599121	13.2509498596191	13.1587285995483	DHRS1	H0YNC2;Q96LJ7
14.5577249526978	14.6846036911011	14.9577493667603	14.7462873458862	15.2898902893066	14.9644002914429	14.7108917236328	14.6584692001343	14.7687864303589	14.6185207366943	SEC11A	H0YNG3;P67812
14.7560682296753	14.6795921325684	14.7617063522339	14.6794490814209	14.864312171936	14.8022375106812	14.850209236145	14.803261756897	14.6086702346802	14.6106042861938	SRPK1	H3BLV9;Q96SB4
11.0833072662354	12.2419633865356	10.9555940628052	11.7912340164185	11.3618078231812	12.0041456222534	11.715443611145	12.0737085342407	12.9613780975342	12.7988004684448	NUB1	H3BM14;H3BM74;Q9Y5A7
13.4480381011963	11.920711517334	12.8095722198486	12.9966402053833	12.2514953613281	13.2264719009399	13.6024284362793	11.3370065689087	13.243968963623	13.2318668365479	AKTIP	H3BM79;Q9H8T0
16.9957523345947	16.7468070983887	16.7731075286865	16.7399101257324	16.4403667449951	16.9552669525146	17.1028575897217	16.1558570861816	16.6468276977539	16.7592544555664	ARPP19	H3BMD8;P56211
14.5254621505737	13.199610710144	14.2653121948242	14.3659286499023	14.060037612915	14.2281255722046	14.1835222244263	13.7225894927979	14.0757331848145	14.0291156768799	SPNS1	H3BMF4;Q9H2V7
17.646053314209	17.05735206604	17.6142311096191	17.4011840820313	17.1609287261963	17.1827850341797	17.5251636505127	16.9104270935059	17.2332000732422	16.8249263763428	RNPS1	H3BMM9;H3BTC0;H3BV80;Q15287
15.4986991882324	15.5258646011353	15.4373712539673	15.345648765564	15.5051355361938	15.3965396881104	15.4443845748901	15.5569849014282	15.508448600769	15.5730562210083	IST1	H3BMU1;H3BUI0;P53990
14.5334692001343	14.6952924728394	14.4413528442383	14.4808158874512	14.5623035430908	14.3421096801758	14.1112985610962	14.4058456420898	13.9999408721924	14.3206129074097	PLA2G15	H3BMU8;Q8NCC3
14.9791097640991	15.0960388183594	14.9265909194946	15.1543874740601	14.9705848693848	15.0564594268799	15.1748838424683	15.1471710205078	15.1142177581787	15.2571897506714	MPI	H3BMZ9;H3BP57;H3BPB8;H3BPM5;H3BPP3;H3BT48;H3BUZ9;P34949
17.9279975891113	18.0181217193604	17.4631366729736	17.7934322357178	16.785737991333	17.4003582000732	17.1356029510498	16.5511722564697	17.4314270019531	17.2501182556152	RAB27A	H3BN55;H3BS49;H3BUD9;H3BVH7;P51159
14.1781406402588	14.031195640564	13.9618263244629	14.0590171813965	13.6102800369263	13.89417552948	14.5013751983643	13.9113779067993	14.2128715515137	13.6744899749756	ZFYVE19	H3BN64;H3BRF9;H3BRM1;H3BUW6;Q96K21
13.5230417251587	13.280873298645	13.3753328323364	13.497974395752	12.7215156555176	13.2606267929077	12.6267509460449	11.9818077087402	13.5007705688477	13.2300405502319	GDE1	H3BNA5;H3BRL5;Q9NZC3
19.7733325958252	18.8443489074707	18.6200542449951	19.1302356719971	18.0054264068604	18.9087810516357	18.6258087158203	18.7968902587891	18.4876499176025	18.9352836608887	;RPS17	H3BNC9;P08708
13.0697336196899	13.6093482971191	13.9561672210693	13.648250579834	13.7749547958374	13.2337732315063	13.7433662414551	13.60338306427	13.7262392044067	13.3130407333374	COQ9	H3BNT2;O75208
14.6302394866943	14.4636116027832	14.5307207107544	14.222487449646	14.3726835250854	14.2640190124512	14.3589859008789	13.8334445953369	14.2618007659912	14.2027463912964	MPHOSPH6	H3BNT4;H3BSB3;Q99547
13.2496843338013	13.6770763397217	13.5535850524902	13.373387336731	13.7375497817993	13.6849908828735	13.561203956604	13.761833190918	13.3698892593384	13.3530645370483	KNOP1	H3BNU8;Q1ED39
15.013858795166	13.7369184494019	13.6967763900757	14.7133455276489	14.814549446106	14.4532747268677	14.3763227462769	14.4396991729736	14.5632610321045	14.3615140914917	COQ7	H3BP28;H3BSZ3;H3BTN8;I3L1T0;Q99807
14.591194152832	14.0168256759644	14.1979112625122	14.2264013290405	13.8679285049438	12.5237579345703	14.0192613601685	14.536678314209	13.4189882278442	13.7502517700195	GALNS	H3BP66;P34059
13.4485750198364	13.5828447341919	13.7088556289673	13.7051210403442	13.5804214477539	13.4570083618164	13.8333339691162	13.4644498825073	13.7155027389526	13.4975919723511	RNF40	H3BP71;O75150
15.024977684021	15.3700284957886	15.2412328720093	15.3182239532471	15.1903047561646	15.270770072937	15.266074180603	15.2172212600708	15.2153577804565	15.2334976196289	MACF1	H3BPE1;H3BQK9
12.7871351242065	12.9978103637695	13.171422958374	13.0233793258667	12.7524890899658	12.8580923080444	13.2926416397095	13.0757350921631	12.9525957107544	13.0176029205322	HAGH	H3BPK3;Q16775
11.5600004196167	11.5948514938354	12.5566835403442	12.4843912124634	12.0532169342041	11.9485702514648	12.2468414306641	10.21422290802	11.8007707595825	11.7798624038696	SGF29	H3BPL5;Q96ES7
15.5573348999023	14.5532197952271	14.7846784591675	14.9253406524658	14.0663003921509	14.6529550552368	14.7434139251709	14.7159729003906	14.3276281356812	14.5458917617798	PPP4C	H3BPN5;H3BTA2;H3BV22;H3BVE3;I3L4X0;P60510
15.2801847457886	14.9305067062378	15.1543025970459	15.2524099349976	15.1212425231934	15.0758333206177	15.1839561462402	14.8279047012329	14.9901142120361	14.7253894805908	CMC2	H3BPP2;Q9NRP2
12.5479574203491	13.3732461929321	13.1068353652954	13.2174472808838	13.4063024520874	13.1145658493042	13.1808595657349	13.5060291290283	13.1543197631836	13.3327741622925	KLHDC4	H3BQH3;Q8TBB5;Q9UF94
14.1935577392578	14.5219507217407	14.9100151062012	15.4153690338135	14.8875169754028	14.564001083374	15.0854358673096	15.5310983657837	15.1283845901489	15.6381998062134	C15orf40	H3BQZ5;Q8WUR7
11.7418298721313	11.9369831085205	12.367094039917	11.8286190032959	12.2370481491089	11.633978843689	12.0454044342041	12.0518941879272	11.8657732009888	12.2300539016724	TERF2	H3BR06;Q15554;U3KQ35
14.5355882644653	14.2300062179565	14.6876726150513	14.6321973800659	14.4245929718018	14.1622896194458	14.7889432907104	14.3734121322632	14.1482191085815	14.5508852005005	RUSF1	H3BR29;H3BSM7;Q96GQ5
14.9248895645142	14.5955457687378	14.5146179199219	14.9013652801514	14.1543560028076	14.7362089157104	13.8166246414185	13.8483667373657	14.4940128326416	14.9248313903809	DCTN5	H3BR94;H3BS05;H3BUD2;Q9BTE1
12.7965307235718	13.4516706466675	13.1962404251099	13.6118869781494	13.637059211731	13.4467811584473	13.1704931259155	13.1338748931885	13.0703458786011	12.6717309951782	KIF22	H3BRB3;Q14807
12.1335649490356	12.0957880020142	12.0068264007568	12.0464057922363	10.972541809082	12.0137128829956	12.1797065734863	11.9423694610596	11.9038686752319	11.7744941711426	ZNRF1	H3BRB6;Q8ND25
13.5979433059692	13.7893962860107	13.893705368042	13.9531450271606	13.7594299316406	14.0718765258789	14.2520666122437	13.5615262985229	13.8609170913696	13.875937461853	RPAP1	H3BRE8;Q9BWH6
15.6643562316895	15.5850286483765	15.6980075836182	15.7315483093262	15.4234771728516	15.6310472488403	15.8168535232544	15.8948373794556	15.6792764663696	15.761326789856	UBFD1	H3BRL3;O14562
18.9714221954346	18.6728630065918	18.2515144348145	18.6736698150635	17.7321071624756	18.2999477386475	18.4967708587646	18.2423362731934	18.127384185791	18.5072383880615	NUTF2	H3BRV9;P61970
14.4398193359375	14.2147789001465	14.1753273010254	14.3348512649536	14.1497144699097	14.2258758544922	14.3227691650391	13.1143589019775	14.1355304718018	14.0139408111572	GFER	H3BRW3;P55789
10.2891397476196	10.9167232513428	11.5600128173828	11.772066116333	11.1088333129883	10.7168245315552	11.0133972167969	10.5832099914551	11.5760202407837	11.0680732727051	CDH16	H3BSG2;O75309
13.719313621521	14.1189479827881	14.1649465560913	14.0008563995361	14.4593744277954	14.3314208984375	14.344482421875	14.4660120010376	13.9905567169189	13.3766593933105	GABARAPL2	H3BSM5;P60520
11.7156171798706	12.2257785797119	12.6533298492432	12.7914705276489	12.8681554794312	12.7907381057739	12.6257486343384	12.5514736175537	12.1649045944214	12.2728471755981	FEM1B	H3BT12;Q9UK73
13.552565574646	13.9954414367676	14.2764701843262	14.0705013275146	14.2818937301636	13.955997467041	13.8253841400146	13.5124340057373	14.2168588638306	13.9955568313599	EARS2	H3BTB7;Q5JPH6
11.6170072555542	11.0257635116577	12.1793031692505	11.5462665557861	10.0990705490112	11.4310913085938	12.3152236938477	9.36258125305176	12.7054252624512	11.6795387268066	NR2F2	H3BTC2;P24468
0.336991369724274	10.0259952545166	9.06594562530518	10.3707723617554	8.51646041870117	10.1659460067749	10.3738479614258	10.5845832824707	10.3617658615112	9.13608741760254	TIPIN	H3BTH1;H3BU04;Q9BVW5
14.5986375808716	14.7775363922119	14.423131942749	14.5050859451294	14.7199764251709	14.7177181243896	14.5551347732544	14.7879819869995	14.5362329483032	14.9316368103027	PKM	H3BTN5
15.1585140228271	15.1191987991333	15.0350332260132	15.1577987670898	15.0596570968628	15.3717651367188	15.4516363143921	15.2818613052368	15.2945671081543	15.4500274658203	JPT2	H3BU16
14.101372718811	14.012806892395	13.6476497650146	13.8430223464966	13.5275421142578	14.0336656570435	14.1500778198242	14.1500377655029	13.9302349090576	14.0491933822632	ARL2BP	H3BU49;Q9Y2Y0
13.4697132110596	12.8189640045166	12.676118850708	12.9217300415039	12.2801656723022	12.4114847183228	12.3159914016724	11.6286382675171	12.7411346435547	12.635950088501	STX16-NPEPL1;STX16;STX16	H3BU86;O14662;Q96NX8
13.6228580474854	12.8268795013428	13.2857542037964	13.3472537994385	12.1960592269897	12.3139200210571	13.3211088180542	12.950608253479	12.8069114685059	12.3852033615112	SP1	H3BUU5;P08047
13.8730888366699	13.2961378097534	13.3949880599976	13.3235082626343	13.1719055175781	13.1873559951782	13.3695402145386	13.2686195373535	13.2406044006348	13.5448589324951	UBL7	H3BUV9;H3BV23;Q96S82
16.9879016876221	17.2604846954346	17.2575149536133	17.4124431610107	17.7548732757568	17.1502246856689	17.0937213897705	17.2799873352051	17.1656379699707	16.8593559265137	CYB5B	H3BUX2;O43169
14.492527961731	14.7766151428223	14.7404146194458	14.6485662460327	14.7425746917725	14.7644958496094	14.8427572250366	14.9976949691772	14.9287910461426	14.8884878158569	VPS35L	H3BVG8;Q7Z3J2
14.335410118103	14.2415714263916	12.7298097610474	14.2749814987183	13.6964797973633	14.2489023208618	13.8313760757446	10.4323196411133	13.822850227356	13.8994007110596	GABARAP	H6UMI1;I3L3J4;O95166
13.9781951904297	14.3615732192993	13.539210319519	14.0656070709229	14.1248159408569	13.9514007568359	13.6404447555542	13.9994955062866	13.8874139785767	14.0268411636353	FCHO2	H7BXJ4;Q0JRZ9
15.1094093322754	15.0985479354858	15.2209377288818	15.1141004562378	15.1632871627808	15.1018562316895	15.1666746139526	15.1403312683105	15.1177806854248	15.0900774002075	DHX30	H7BXY3;Q7L2E3
14.6925773620605	14.7940530776978	14.8556108474731	14.8526611328125	14.4514560699463	14.6051692962646	14.7648420333862	14.217791557312	14.6919536590576	14.6052141189575	NUP58	H7BYF2;Q5JRG1;Q9BVL2
14.3634185791016	14.3297786712646	14.4552783966064	14.2026786804199	14.3753929138184	14.2214984893799	14.455662727356	14.4332618713379	14.3847904205322	14.0884380340576	CSNK1D	H7BYT1;P48730
18.8466510772705	18.7369842529297	18.6190357208252	18.8173732757568	18.6374282836914	18.7693538665771	18.6084003448486	18.4452114105225	18.5893268585205	18.6260547637939	TPM1	H7BYY1
22.4047718048096	21.5972881317139	21.5682773590088	21.6811485290527	21.3306369781494	21.5881576538086	21.4818820953369	21.6792049407959	21.4794311523438	21.5268974304199	PDIA3	H7BZJ3
14.8636541366577	15.4912157058716	15.2471981048584	15.2066659927368	15.0431289672852	14.6611576080322	15.2688293457031	15.4202041625977	14.9138116836548	14.8858594894409	SF1	H7BZT1
14.2150411605835	14.2161159515381	14.3805484771729	13.9602680206299	13.9947662353516	14.1396617889404	14.3975486755371	14.5144596099854	14.395619392395	14.1055860519409	YIPF4	H7C0D5;Q9BSR8
14.134596824646	14.3063249588013	14.2605323791504	14.2116575241089	14.0844106674194	14.3585691452026	14.5462369918823	14.3644599914551	14.1267051696777	14.5039930343628	ZPR1	H7C0E5;O75312
1.03636431694031	11.0359477996826	11.396484375	10.7812299728394	10.8935317993164	10.9212884902954	11.3398990631104	11.0989542007446	11.1199150085449	10.9419240951538	DHX57	H7C109;Q6P158
15.7298078536987	15.2059640884399	15.2694292068481	15.1433172225952	14.906268119812	14.9661645889282	15.1967353820801	15.0322856903076	15.1360940933228	15.0978298187256	ACAA1	H7C131;P09110
12.6810741424561	12.4597568511963	12.5177917480469	13.0565309524536	11.6007833480835	13.151837348938	12.6103849411011	12.3531112670898	12.1310510635376	12.5039415359497	;ATG9A	H7C152;Q7Z3C6
14.2620372772217	13.915153503418	14.3900775909424	14.1220722198486	13.8081932067871	13.706748008728	14.4385004043579	14.136191368103	14.0391731262207	14.170877456665	GALM	H7C1B5;H7C320;Q96C23
12.5500640869141	14.2323541641235	13.197377204895	13.4550180435181	12.0770950317383	14.0023565292358	12.9104337692261	13.5762948989868	13.3539304733276	13.7894525527954		H7C1D0
13.5533542633057	12.9115123748779	12.7572975158691	12.5513734817505	12.3897390365601	13.1626033782959	12.5784578323364	12.1289691925049	11.3045349121094	11.676700592041	UHRF1BP1	H7C1J4;Q6BDS2
12.2552146911621	13.8453407287598	13.8292350769043	14.0577659606934	13.5765428543091	13.882698059082	13.9342613220215	13.9910326004028	13.7332391738892	13.7214841842651	DNTTIP1	H7C1M5;Q9H147
16.4231758117676	16.1674957275391	16.4078121185303	16.2309398651123	16.5310516357422	16.2936859130859	16.2816505432129	16.4407215118408	16.351806640625	16.1896572113037	APOO	H7C1U8;Q9BUR5
11.3003301620483	12.1532878875732	13.2378721237183	12.0763092041016	12.8910083770752	12.5454788208008	12.8952856063843	13.0782737731934	13.1077795028687	12.6638927459717	CTDSP1	H7C1Z7;H7C270;Q9GZU7
12.7917623519897	12.4969530105591	12.7483835220337	13.0936079025269	12.8617696762085	12.8700370788574	13.0418901443481	12.5157823562622	13.0053749084473	12.7091569900513	CYFIP2	H7C229
13.6721868515015	13.5349168777466	13.7391490936279	13.7559537887573	13.452353477478	13.4724931716919	13.7753353118896	13.0312690734863	13.6182994842529	13.6762094497681	TRAPPC12	H7C2F7;Q8WVT3
15.2716207504272	14.8962469100952	15.2945804595947	14.946457862854	15.0384788513184	14.7474870681763	15.3477792739868	15.2371797561646	15.1761417388916	14.959303855896	EPB41L1	H7C2K6
17.104907989502	16.6190586090088	16.8004741668701	16.7108211517334	16.6579742431641	16.6147117614746	16.6385288238525	16.4652824401855	16.6291732788086	16.5243721008301	EBNA1BP2	H7C2Q8;Q99848
10.2603464126587	7.7914924621582	10.6116075515747	10.1951332092285	10.4870891571045	10.075535774231	11.2475490570068	9.22894859313965	10.8620748519897	9.59829902648926	SLC4A7	H7C3C4
14.1488494873047	13.5704898834229	13.9752712249756	14.0378789901733	13.3333158493042	13.5905132293701	13.4824047088623	13.1565160751343	13.2380590438843	13.4463510513306	FARP2	H7C3M7
13.0374870300293	12.8541984558105	13.0662479400635	13.3050422668457	12.4368257522583	12.9551258087158	13.2033796310425	12.8626708984375	12.9234991073608	12.8370046615601	ATG2A	H7C3T2;Q2TAZ0
13.7144222259521	13.4806175231934	13.3525819778442	13.4009771347046	13.2134532928467	13.1286964416504	13.1311979293823	13.3458337783813	13.2350435256958	13.33447265625		H7C417
13.5195140838623	13.5872058868408	13.8586082458496	13.6110019683838	13.5902690887451	13.0691566467285	13.6777849197388	13.4486598968506	13.4332685470581	12.4847478866577	CPSF4	H7C419;O95639
14.9375352859497	14.4657754898071	14.8215141296387	14.6758060455322	14.5258588790894	14.3163022994995	14.4953136444092	14.5588521957397	14.6336851119995	14.4689588546753	MFF	H7C433
13.384934425354	14.7258825302124	14.6316061019897	14.5649394989014	14.6735382080078	14.1600704193115	14.6599912643433	12.6739625930786	14.257399559021	14.1881055831909	BCS1L	H7C492;Q9Y276
9.89303874969482	11.5533714294434	10.5433902740479	10.0279502868652	11.4649686813354	8.822434425354	11.2444133758545	10.774956703186	10.9277954101563	10.9040422439575	MBOAT2	H7C5D1;Q6ZWT7
13.515097618103	13.5725555419922	13.4602355957031	13.6561088562012	13.7154922485352	13.3427076339722	13.5218420028687	13.7314109802246	13.5560503005981	13.1839170455933	XRN1	H7C5E4;Q8IZH2
13.8892450332642	14.4168586730957	13.8858480453491	14.2381944656372	14.1462478637695	14.4448766708374	14.342381477356	14.7250375747681	14.1680679321289	14.5056848526001	IAH1	H7C5G1;Q2TAA2
15.0232276916504	14.5047512054443	14.5342559814453	14.733437538147	14.3505821228027	14.4218788146973	14.1092081069946	14.2741079330444	14.427282333374	14.6480827331543	MRPL27	H7C5U8;Q9P0M9
14.9296817779541	15.0356702804565	14.4311513900757	14.8977212905884	14.2195196151733	14.8269872665405	14.1663789749146	14.2807111740112	14.4300909042358	14.3652801513672	SELENON	H9KV50;Q9NZV5
18.8754062652588	18.5737571716309	17.6574077606201	18.2963752746582	17.4318389892578	18.3097877502441	17.5715465545654	17.9654026031494	18.1153755187988	18.0852088928223	;HBA1	HBA_HUMAN;P69905
17.9225959777832	17.0512008666992	15.9274835586548	16.2365245819092	16.3109092712402	16.9755516052246	15.8145370483398	16.5897903442383	16.3813362121582	16.6193962097168	;HBB	HBB_HUMAN;P68871
20.4092960357666	20.5762214660645	20.6330852508545	20.6047267913818	20.5737266540527	20.3973503112793	20.4976444244385	20.5752124786377	20.6273632049561	20.458044052124	NSF	I3L0N3;P46459
15.7740268707275	15.0701923370361	15.1336727142334	15.3830232620239	15.1871213912964	15.4528350830078	15.3899345397949	15.3202342987061	15.0677852630615	15.0691804885864	CCDC137	I3L0U5;Q6PK04
13.1015129089355	13.0915651321411	13.8325090408325	13.3754959106445	13.6518812179565	13.4646501541138	13.9396944046021	13.3833293914795	13.3849430084229	13.6152973175049	SPAG7	I3L0X5;O75391
11.6464672088623	12.9858913421631	13.4532146453857	12.769097328186	12.4586353302002	12.6955680847168	13.5906610488892	12.661735534668	12.9452905654907	12.8772010803223	TOM1L1	I3L1G1;I3L4I4;J3KQU4;O75674
16.5909481048584	16.8704872131348	16.9453678131104	16.735652923584	17.1611366271973	16.8233451843262	16.7266139984131	16.9987335205078	16.9234657287598	16.7294464111328	SLC25A11	I3L1P8;Q02978
14.5568943023682	14.6191501617432	14.422830581665	14.6680517196655	14.2615432739258	14.6670770645142	14.7142648696899	14.6555213928223	14.5079202651978	14.7168531417847	PCYT2	I3L1R7;Q99447
15.922905921936	15.3075389862061	15.4408884048462	15.4403438568115	15.060998916626	15.1860570907593	15.280743598938	15.0870313644409	15.1667861938477	15.1386947631836	DERL2	I3L1T3;Q9GZP9
15.8756046295166	15.6552085876465	15.477653503418	15.6083917617798	15.6469945907593	15.630145072937	15.8152341842651	15.622389793396	15.7184600830078	15.750376701355	FLYWCH2	I3L1Y9;Q96CP2
14.6603059768677	14.4113740921021	14.7294073104858	14.5683498382568	14.6290740966797	14.1631879806519	14.4556331634521	15.1238098144531	14.298378944397	14.2769727706909	MPDU1	I3L295;J3KT75;J3QRD5;J3QS48;J3QW43;O75352
15.9809427261353	16.5153789520264	16.5955276489258	17.6211357116699	16.5731964111328	17.6895198822021	16.781494140625	17.0176239013672	16.6381454467773	16.5705127716064	GEMIN4	I3L2C7;P57678
10.9168395996094	10.2046089172363	11.6822919845581	11.775915145874	11.7250261306763	11.4629135131836	11.7449560165405	11.5564737319946	11.7980308532715	11.4945268630981	MED31	I3L2J1;Q9Y3C7
13.4940977096558	12.5684309005737	12.7773942947388	12.8704881668091	12.3023633956909	12.3496761322021	12.7156648635864	12.5342845916748	12.2379131317139	11.7631616592407	CEP131	I3L2J8;Q9UPN4
13.3663311004639	13.6359672546387	14.0358352661133	12.3027124404907	12.2205505371094	13.6026306152344	13.8536548614502	13.4853134155273	13.9694128036499	13.7260274887085	ZC3H7A	I3L2K5;Q8IWR0
13.9915428161621	13.7756595611572	13.2689809799194	13.6040716171265	13.3588819503784	13.8365058898926	13.6160621643066	10.7953462600708	13.5612258911133	13.6616287231445	LCMT1	I3L2Q8;Q9UIC8
10.6642084121704	12.0712699890137	12.1785821914673	12.3864946365356	11.9401903152466	12.4516458511353	13.2382001876831	12.4828300476074	12.8422889709473	12.2795295715332	MLKL	I3L2T9;Q8NB16
17.9178314208984	18.2175235748291	17.915943145752	17.9051628112793	18.0891609191895	18.1549587249756	18.09299659729	17.4530982971191	18.0057640075684	18.0150318145752	EIF5A	I3L397;I3L504;P63241
12.6379690170288	13.2127532958984	13.2636976242065	13.3531246185303	13.3412599563599	13.4279327392578	13.2486724853516	12.7131881713867	13.1860218048096	12.8629713058472	DHODH	I3NI32;Q02127
12.7434053421021	13.0737333297729	12.7157497406006	12.881609916687	12.9214611053467	12.8762540817261	13.1345624923706	11.3874244689941	12.9908151626587	12.8603019714355	KDM2A	I3VM54;Q9Y2K7
15.0215339660645	14.9040460586548	15.1396427154541	14.9780139923096	14.9437522888184	14.8192701339722	14.9822750091553	14.8919677734375	14.9600877761841	14.995717048645	NUP88	J3KMX1;Q99567
9.62163162231445	11.3577337265015	11.2889814376831	11.314884185791	10.6504192352295	10.7857093811035	12.127049446106	10.8339881896973	10.8471364974976	10.4644889831543	CDCA3	J3KMY0;Q99618
15.4927635192871	15.3486461639404	15.079607963562	15.4845027923584	15.381139755249	15.6782741546631	15.427848815918	15.4368486404419	15.2494163513184	17.0888690948486	DPF2	J3KMZ8;Q92785
13.5119104385376	13.6981496810913	14.0545740127563	13.979248046875	13.9923858642578	13.8877449035645	13.5837383270264	13.3016490936279	13.8925580978394	13.6408853530884	LDLR	J3KMZ9;P01130
15.8427143096924	15.6561622619629	15.7622241973877	15.7415657043457	15.6037483215332	15.5428028106689	15.8018379211426	15.7081108093262	15.6712255477905	15.6371555328369	AFDN	J3KN01;P55196
16.4079875946045	16.7148036956787	16.6984100341797	16.6417560577393	16.7184314727783	16.6615467071533	16.7366199493408	16.8892078399658	16.6628131866455	16.7050437927246	ECPAS	J3KN16;Q5VYK3
17.2940330505371	16.4285717010498	16.6217021942139	16.6270446777344	16.0510768890381	16.3038482666016	16.5159149169922	16.4228744506836	16.3588523864746	16.2977390289307	TOR1AIP1	J3KN66
14.5445508956909	14.7539768218994	14.961109161377	14.7929964065552	14.9297504425049	15.1073904037476	15.2905788421631	14.9429550170898	15.0901775360107	15.2925567626953	CCS	J3KNF4;O14618
15.8121252059937	14.4940042495728	15.5734214782715	15.7887029647827	15.514705657959	15.5284233093262	15.2151918411255	15.4890193939209	14.8475942611694	15.4238662719727	PHKG2	J3KNN3;P15735
14.668966293335	15.066632270813	14.4376878738403	14.4537925720215	15.4195604324341	13.6944198608398	15.1629095077515	14.4377326965332	15.0337696075439	14.5786294937134	AGTPBP1	J3KNS1;Q9UPW5
13.891149520874	13.3580961227417	13.2543821334839	13.8862819671631	13.5578413009644	13.6356105804443	13.564507484436	13.2462472915649	13.443510055542	13.2318525314331	LMO7	J3KP06;Q8WWI1
20.274564743042	19.7627220153809	20.0116176605225	19.9706687927246	19.8264751434326	19.9401779174805	20.0693759918213	19.6896114349365	19.8512096405029	19.5496215820313	SRSF2	J3KP15;J3QL05;Q01130
14.6499443054199	14.1201143264771	14.6404848098755	14.5288372039795	14.5621395111084	14.1691665649414	14.4929161071777	13.959415435791	14.2806987762451	14.3593769073486	RBM7	J3KPD3;Q9Y580
14.7319469451904	14.3515615463257	14.4989500045776	14.6224355697632	14.4180822372437	14.5491371154785	14.7189779281616	14.2308616638184	14.3453235626221	14.5315885543823	HDAC7	J3KPH8;Q8WUI4
15.8686151504517	15.4881477355957	15.9957962036133	15.8623008728027	15.6571559906006	15.8273658752441	15.836446762085	13.3479137420654	15.4800701141357	15.5064153671265	MRPL42	J3KPP0;Q9Y6G3;S4R2Z7;S4R360
14.2759561538696	14.3371467590332	14.5411777496338	14.6292886734009	14.6429615020752	14.3779134750366	14.62526512146	14.3183660507202	14.4795837402344	14.0110158920288	LUC7L3	J3KPP4;O95232
13.8552274703979	13.9234161376953	13.9655408859253	14.1170291900635	13.8680238723755	13.8002796173096	13.7510871887207	13.6824855804443	13.7459735870361	13.7196044921875	DNAJB12	J3KPS0;Q9NXW2
21.299430847168	21.3274669647217	20.9534912109375	21.1841773986816	21.165397644043	21.2933673858643	21.2574729919434	21.3920574188232	21.1482334136963	21.4393978118896	ALDOA	J3KPS3;P04075
13.9122257232666	14.0935134887695	14.1315498352051	14.471305847168	14.2859573364258	13.9639177322388	13.654465675354	12.1831817626953	13.9840402603149	13.8071241378784	TRABD	J3KPT4;Q9H4I3
17.5184631347656	17.975513458252	17.7892684936523	17.7659606933594	18.0552673339844	18.0445556640625	17.8786735534668	18.2086582183838	17.9461631774902	18.0484809875488	OLA1	J3KQ32;Q9NTK5
15.6996879577637	15.6612939834595	15.8487415313721	15.6148052215576	15.8214015960693	15.4903573989868	15.6954193115234	15.8359375	15.7483997344971	15.5661354064941	PTRH2	J3KQ48;Q9Y3E5
11.959171295166	12.4820423126221	12.5273942947388	12.3745241165161	12.195574760437	12.1305494308472	12.2115545272827	12.6435880661011	12.3491373062134	12.3120813369751	BRD1	J3KQ61;O95696
15.6546182632446	15.6957101821899	15.7397480010986	15.8873329162598	15.7692050933838	15.5961580276489	15.7188730239868	15.5182847976685	15.6656560897827	15.7238168716431	SUMF2	J3KQJ1;Q8NBJ7
17.9433670043945	17.3918075561523	17.4721927642822	17.3889083862305	17.5512065887451	17.3121471405029	17.3708267211914	17.1851940155029	17.5321311950684	17.3797779083252	APOL2	J3KQL8
17.514347076416	16.5574684143066	16.9145069122314	16.9565410614014	16.6103820800781	16.8582572937012	16.7749824523926	16.664514541626	16.8110103607178	16.8107662200928	RPL36A;RPL36A;RPL36AL	J3KQN4;P83881;Q969Q0
12.9892435073853	13.030779838562	12.6917123794556	13.219654083252	12.8461246490479	12.7791423797607	13.0148458480835	12.903338432312	12.5274705886841	12.698130607605	CEP170B	J3KQR7;Q9Y4F5
15.1124124526978	14.8974561691284	14.7208032608032	14.913818359375	14.4963684082031	14.8244113922119	14.9735136032104	14.772367477417	14.6190786361694	14.6667366027832	BABAM1	J3KQS6;M0QXG9;M0R0I0;M0R193;M0R2A4;M0R2K3;M0R3F4;Q9NWV8
10.6331996917725	10.4099750518799	11.8807325363159	11.5396337509155	11.1657190322876	12.7256479263306	11.7251348495483	12.6269340515137	11.74036693573	11.6333389282227	CCDC12	J3KR35;Q8WUD4
15.4773101806641	16.0084419250488	15.8636608123779	15.8601207733154	15.9618902206421	15.9367742538452	16.0051746368408	16.1090660095215	15.8580150604248	16.0924892425537	TBCD	J3KR97;Q9BTW9
14.0164031982422	14.0443925857544	13.9799394607544	14.0523128509521	13.9078512191772	14.0065107345581	14.1137657165527	14.2998266220093	14.0568647384644	14.2729949951172	SMG1	J3KRA9;Q96Q15
12.0306663513184	11.3460454940796	11.4961271286011	10.1357650756836	12.1949214935303	11.6001672744751	12.5863037109375	12.2124938964844	12.0100107192993	12.1616115570068	SPATA33	J3KRC8;Q96N06
13.6841716766357	13.4915933609009	13.3913431167603	13.4271202087402	13.3075180053711	13.6463928222656	13.658670425415	13.5370893478394	13.3713979721069	13.398738861084	RNF138	J3KRU4;J3KSI2;J3QKM8;Q8WVD3
11.5900659561157	11.1770601272583	11.8713102340698	11.6119031906128	12.1974868774414	11.2459774017334	11.5577611923218	12.5477781295776	12.0324535369873	11.835599899292	SLC25A19	J3KRY6;J3KS44;J3KSB1;J3KSI7;J3QL84;J3QLV3;Q9HC21
15.6577558517456	15.6064453125	15.698784828186	15.8681812286377	15.7336072921753	15.4500370025635	15.467752456665	14.7987775802612	15.5528364181519	15.1785840988159	MRPL58	J3KS15;Q14197
14.3292293548584	14.2761554718018	14.1172189712524	14.2656354904175	14.0984888076782	14.103401184082	13.8057956695557	14.1396951675415	13.7665414810181	14.0183925628662	DCXR	J3KS22;Q7Z4W1
15.3373804092407	14.8865566253662	15.1796503067017	15.2509441375732	14.7861833572388	14.7722005844116	15.2802333831787	15.2003002166748	14.9465961456299	15.1709260940552	FLII	J3KS54
15.7048425674438	15.4537925720215	15.3533000946045	15.4748001098633	15.7903537750244	15.0583639144897	14.9633674621582	15.5058345794678	15.6457004547119	15.618971824646	CYBC1	J3KS78;J3KSB6;J3KSJ5;J3KTI1;J3QKS6;J3QKZ6;J3QLB7;J3QRG5;J3QRZ2;J3QS53;Q9BQA9
5.48778676986694	7.48364305496216	6.17676401138306	11.3037748336792	6.29624271392822	9.47184371948242	-0.441326349973679	7.28422927856445	5.54506969451904	11.2163763046265	PPP1R1B	J3KSJ8;Q9UD71
13.2372236251831	13.5997190475464	13.4340887069702	13.5458583831787	13.1911296844482	12.8365259170532	13.222279548645	13.413010597229	13.4520568847656	13.5095329284668	TRAPPC8	J3KSL8;J3QSA1;Q9Y2L5
13.2152662277222	12.1435737609863	11.8095617294312	12.1790418624878	11.6671772003174	12.5027551651001	10.9238862991333	12.2062282562256	11.9873418807983	12.2336044311523	DHX40	J3KSW6;J3KTK0;Q8IX18
18.629732131958	18.3607387542725	18.047700881958	18.4631042480469	18.0660800933838	18.7463531494141	18.3943653106689	18.5946445465088	18.2915878295898	18.6325187683105	JPT1	J3KT51;Q9UK76
12.7354955673218	13.3212299346924	13.2222557067871	13.06715965271	13.6066436767578	13.1296319961548	13.0659189224243	13.2606296539307	13.3614921569824	13.2794227600098	FBXL20	J3KTA1;Q96IG2
19.2258472442627	19.2500019073486	19.3081035614014	19.310510635376	19.4300918579102	19.3663082122803	19.2804336547852	19.2081146240234	19.285083770752	19.0679607391357	DDX5	J3KTA4;P17844
13.6453371047974	13.590292930603	13.1766757965088	13.1952953338623	12.6871538162231	13.3315858840942	13.442626953125	12.9330005645752	12.9568500518799	13.3683710098267	CBFB	J3KTD8
6.90370416641235	12.4469871520996	11.7177276611328	12.2157592773438	12.3791084289551	12.5196390151978	12.3399686813354	10.5953798294067	12.3029718399048	12.1688537597656	MED9	J3KTK5;Q9NWA0
19.4884567260742	19.0867023468018	19.2258567810059	19.2600173950195	19.1830825805664	19.1395778656006	19.1385059356689	18.8319683074951	19.0706596374512	18.9478759765625	SRSF1	J3KTL2;Q07955
14.1564655303955	14.3652763366699	14.5657434463501	14.3440723419189	15.001579284668	14.2701396942139	14.5482778549194	14.5689888000488	14.4200410842896	14.3657522201538	SLC16A3	J3KTM6;J3QQV2;O15427
15.299840927124	15.3474702835083	15.461763381958	15.35413646698	15.2877655029297	15.2776641845703	15.3773984909058	15.3916778564453	15.5141077041626	15.2379865646362	CHERP	J3QK89;Q8IWX8
13.0983572006226	14.1439037322998	14.2493085861206	14.2494382858276	14.2208890914917	13.8141717910767	14.6733551025391	13.4230575561523	13.594310760498	13.6121282577515	MSI2	J3QKT5;Q96DH6
12.2585535049438	12.7613487243652	12.777943611145	12.5926694869995	12.7948246002197	12.9174165725708	12.8616151809692	12.7998132705688	12.8865852355957	12.9813089370728	AKT2	J3QKW1;M0R0P9;P31751
14.4274158477783	15.2879447937012	15.6189861297607	15.3619184494019	15.3489513397217	15.2405872344971	15.1246271133423	14.8810920715332	15.4309139251709	15.1037921905518	SCO1	J3QL56;O75880
14.3460702896118	14.6338129043579	14.6160116195679	14.5646934509277	14.3799028396606	13.8751907348633	14.3852005004883	14.3557691574097	14.0036468505859	14.3915538787842	SCRN2	J3QL71;J3QQM9;Q96FV2
12.754376411438	12.5975618362427	12.2294082641602	13.1940822601318	13.2249526977539	12.6355609893799	13.4108533859253	13.2070064544678	13.3278465270996	13.071231842041	STARD3	J3QLM1;Q14849
16.161226272583	15.8974199295044	15.9749374389648	15.9856758117676	15.7562055587769	15.8244876861572	15.6714363098145	15.5221824645996	15.8511543273926	15.5953321456909	MRPS23	J3QLR8;Q9Y3D9
14.9278392791748	14.8856925964355	14.9747791290283	14.9138231277466	15.0136623382568	14.8610200881958	14.7898511886597	14.7596311569214	14.9109315872192	14.7811641693115	MRPS7	J3QLS3;Q9Y2R9
19.3299903869629	19.6041202545166	19.6079940795898	19.512565612793	19.8198757171631	19.6516304016113	19.650936126709	19.6930389404297	19.5958671569824	19.5677127838135	RPL18	J3QQ67;Q07020
13.6001062393188	13.2142629623413	13.4723453521729	13.6870737075806	13.5448007583618	13.2894105911255	13.8008213043213	13.4247064590454	13.5146894454956	13.4646844863892	SAP30BP	J3QQJ0;Q9UHR5
13.704719543457	13.0225448608398	13.4632148742676	13.5408916473389	13.4052095413208	13.4638023376465	13.4050426483154	13.0258493423462	13.186450958252	13.2506742477417	SUZ12	J3QQW9;Q15022
16.4908599853516	16.4603424072266	16.6379489898682	16.415111541748	16.6899719238281	16.4166431427002	16.5014839172363	16.0580997467041	16.5592956542969	16.3446655273438	TMCO1	J3QQY2;Q9UM00
15.2891941070557	15.4196014404297	15.1034698486328	15.4838666915894	14.8999137878418	15.3648099899292	15.3820695877075	15.1756134033203	15.2405376434326	15.4107027053833	PNPO	J3QQZ9;Q9NVS9
13.6066637039185	13.3219366073608	13.5217189788818	13.5648031234741	13.1223850250244	13.308765411377	13.3354196548462	12.6722068786621	13.218770980835	12.976354598999	YTHDC1	J3QR07;Q96MU7
19.0742263793945	19.7646427154541	19.8634166717529	19.6909503936768	20.2866973876953	19.6827545166016	20.0999450683594	20.0315685272217	19.8452777862549	19.9446811676025	MYL12A;MYL12B;MYL12A	J3QRS3;O14950;P19105
16.1881561279297	15.8089866638184	15.8939685821533	15.938006401062	15.7083930969238	15.9228000640869	15.8630971908569	15.7515115737915	15.8667163848877	15.6453351974487	ZNF207	J3QRS9;O43670;X6R4W8
16.3853092193604	16.1065692901611	16.2440166473389	15.9553728103638	16.302131652832	15.9441986083984	16.0445518493652	15.9409761428833	16.1046161651611	16.0304946899414	YES1	J3QRU1;P07947
14.2467546463013	12.928126335144	13.1783685684204	13.2161493301392	13.499361038208	13.0519609451294	13.2013711929321	13.1137809753418	13.3661737442017	13.174446105957	LLGL2	J3QRV5;Q6P1M3
16.7552947998047	16.4207077026367	16.1923866271973	16.5124645233154	16.0390605926514	16.1596393585205	15.8126096725464	16.0215549468994	15.9125204086304	15.9153165817261	TWSG1	J3QS03;Q9GZX9
13.5490980148315	14.1176261901855	13.8722333908081	13.7270336151123	13.4263668060303	13.4203224182129	13.410044670105	12.0234451293945	13.6350030899048	13.1710386276245	VEZF1	J3QSH4;Q14119
13.9689168930054	13.1511526107788	13.7903633117676	13.9252901077271	12.9020576477051	12.198673248291	13.5735101699829	13.4606924057007	13.2497854232788	13.3684034347534	ABLIM1	J3QSX6
17.2797565460205	17.4185161590576	17.3726425170898	17.4023532867432	17.561803817749	17.471118927002	17.3724365234375	17.5929126739502	17.3932266235352	17.4202041625977	BUB3	J3QT28;O43684
14.6908130645752	14.4380025863647	14.5371894836426	14.6474304199219	14.4956655502319	14.3520669937134	14.6839237213135	14.4626722335815	14.6188106536865	14.3474950790405	CHCHD6	J3QTA6;Q9BRQ6
14.3531093597412	14.2953500747681	14.0398006439209	14.1528949737549	14.2217025756836	14.0616722106934	14.069299697876	14.3758125305176	14.0163764953613	14.3043031692505	C17orf75	J9JIC5;Q9HAS0
12.4321994781494	15.6364307403564	11.0388193130493	10.6324081420898	15.3638429641724	11.8857526779175	10.8029804229736	10.3072938919067	15.5751867294312	15.627875328064	HYI	J9JIE9;Q5T013
18.6217823028564	18.4733963012695	17.2875137329102	17.0605163574219	17.3228950500488	19.038969039917	18.0397052764893	19.3250789642334	18.7649307250977	18.5276126861572	;KRT2	K22E_HUMAN;P35908
14.9467868804932	14.8986549377441	14.6828289031982	14.935453414917	14.4926023483276	14.9862565994263	14.7443714141846	14.4866542816162	14.5012817382813	14.7258043289185	RWDD4	K4DI92;Q6NW29
14.5086879730225	14.3265266418457	14.6147193908691	14.5624961853027	14.3709402084351	14.332293510437	14.1794137954712	14.2374696731567	14.242299079895	14.2709798812866	ALG1	K7EID2;Q9BT22
21.2145252227783	20.8905506134033	20.7407627105713	20.7916946411133	20.8100891113281	20.879487991333	20.7218894958496	21.1578216552734	20.8075160980225	20.9037761688232	KATNAL2	K7EIJ8;K7EM02;Q8IYT4
15.7209415435791	15.6831226348877	16.0803756713867	14.7794485092163	15.7699499130249	15.449049949646	15.6480150222778	15.8272953033447	15.2498168945313	14.4404716491699	TMED1	K7EIN4;K7EQ63;Q13445
10.7733211517334	11.4753160476685	12.2410593032837	11.1940288543701	12.5031547546387	12.1966943740845	12.1638135910034	10.1694850921631	12.253324508667	11.6539859771729	CACTIN	K7EIU6;K7ENY9;Q8WUQ7
13.5182933807373	14.5376253128052	14.1165885925293	13.7854900360107	14.5492677688599	14.5436534881592	13.9394969940186	13.8358478546143	14.3543004989624	14.27135181427	SMAD4	K7EIU8;Q13485
14.524299621582	10.5445823669434	13.8597793579102	14.7690029144287	12.9059448242188	14.4974365234375	11.5903053283691	12.2078485488892	12.0890626907349	12.4707870483398	FAM32A	K7EIY1;K7ELZ8;K7ENN5;Q9Y421
15.1006460189819	14.2864685058594	14.8189506530762	14.3459873199463	14.7137289047241	14.389820098877	14.6510601043701	14.6313390731812	14.7282028198242	14.472767829895	STX10	K7EIY4;K7ELY2;K7EPP9;O60499;Q5U8S2
18.1325073242188	18.0057792663574	18.1091537475586	18.0457859039307	17.9159088134766	17.7748928070068	17.8567771911621	17.8465156555176	17.9604930877686	17.8711967468262	LONP1	K7EJE8;K7EKE6;P36776
15.6446418762207	15.6713533401489	15.3427658081055	15.6075067520142	15.1839256286621	15.6239233016968	15.808572769165	15.6479082107544	15.5959625244141	15.71706199646	SPC24	K7EJH0;K7EJV2;K7EMX1;K7ESQ2
10.8916721343994	11.5538415908813	12.0178489685059	12.0521697998047	11.7537784576416	11.5173244476318	11.6029405593872	11.8240337371826	12.0031137466431	11.8132734298706	PGS1	K7EJP6;K7EL44;K7ELT9;Q32NB8
17.2375411987305	15.0933923721313	15.1205940246582	15.7671022415161	12.3211584091187	15.042742729187	14.7827768325806	10.1746206283569	13.6749782562256	14.2250995635986	H3-3B;H3C1;H3-3A;H3C15	K7EK07;P68431;P84243;Q71DI3
17.4270515441895	17.1286315917969	17.1680603027344	17.0451335906982	16.9614562988281	17.0328311920166	17.0484237670898	16.749418258667	17.0175189971924	16.9268760681152	DAZAP1	K7EK33;K7EQ55;Q96EP5
16.6081275939941	16.8539047241211	16.9753131866455	16.4554004669189	14.8277835845947	12.3881483078003	14.212423324585	17.2491054534912	17.2128391265869	16.7059898376465	FMNL1	K7EK60
14.8416891098022	13.9850492477417	15.0322198867798	14.6844348907471	14.8236408233643	14.1424989700317	14.8631839752197	14.4959754943848	14.7555875778198	14.3792963027954	PPL	K7EKI8;O60437
13.9652423858643	14.0054187774658	14.0664958953857	14.1261196136475	13.8793058395386	13.883243560791	14.2459478378296	14.153715133667	14.0805883407593	14.0292749404907	PPP1R12C	K7EL81;Q9BZL4
15.3291654586792	14.8483943939209	14.8889303207397	14.9277324676514	14.8615818023682	14.5382738113403	14.523964881897	14.5153751373291	14.5375518798828	14.6768589019775	SYNGR2	K7ELD9;K7ENG9;O43760
18.2735748291016	17.7991333007813	17.9014015197754	17.9926509857178	17.8068332672119	17.8670330047607	17.8746490478516	17.7445659637451	17.794713973999	17.7866802215576	PRKCSH	K7ELL7;P14314
16.1108703613281	15.7775363922119	15.9489850997925	16.0853404998779	15.825249671936	15.7459106445313	15.6900386810303	15.7984170913696	15.6584758758545	15.6057844161987	TMEM205	K7ELQ9;Q6UW68
15.7209272384644	16.113452911377	15.9440956115723	16.1508197784424	15.9753675460815	16.388879776001	16.0568695068359	16.2135677337646	16.0660266876221	16.2549648284912	EIF1	K7EM18;P41567
13.1831970214844	13.2825870513916	13.8693809509277	13.4053087234497	13.5099906921387	12.9746770858765	13.4361457824707	12.8663654327393	13.4854497909546	12.9627904891968	SPINT2	K7EM91;O43291
15.5671319961548	15.3749513626099	15.6948080062866	15.7071094512939	15.7968978881836	15.6588449478149	15.7797956466675	15.957615852356	15.7725801467896	15.5795850753784	LSM7	K7EML7;K7ENY5;Q9UK45
15.4983682632446	15.4904193878174	15.384334564209	15.1522779464722	15.4363927841187	15.1700410842896	15.2196865081787	15.6759281158447	15.3642730712891	15.4527740478516	DNM2	K7EMQ3
15.862452507019	16.1765174865723	15.8825855255127	16.017240524292	15.9275703430176	16.2143211364746	15.9315052032471	15.7993144989014	15.8267488479614	16.1355819702148	HDHD2	K7EMY7;K7ER15;Q9H0R4
11.4631376266479	13.8853454589844	14.0407609939575	13.9700021743774	14.1923608779907	14.0904636383057	14.2256202697754	14.1939477920532	14.0819749832153	14.0345478057861	NARS1	K7ENF0
16.1771202087402	16.130916595459	15.8682384490967	15.9892807006836	16.114631652832	16.2051525115967	15.9485416412354	16.0908279418945	16.0131340026855	16.1462078094482	PSMG2	K7ENR6;Q969U7;V9GZ55
14.3577461242676	14.2039670944214	14.3891172409058	14.280571937561	13.4724721908569	13.6550359725952	14.1103668212891	13.6353225708008	14.1110067367554	14.0531091690063	RBM42	K7EP90;Q9BTD8
13.8302450180054	13.2284669876099	12.6161823272705	12.6641273498535	13.0701179504395	13.1808557510376	12.7734718322754	11.9159202575684	12.135817527771	11.2278537750244	TMEM161A	K7EPA3;K7EQ34;K7EQE7;Q9NX61;U3KQT6
16.5553073883057	15.9001512527466	16.3152389526367	16.0185012817383	16.0312919616699	15.8319807052612	16.3011608123779	15.5002021789551	16.6116905212402	16.3563785552979	GRN	K7EQ05;P28799
13.0427885055542	13.4744319915771	13.4878034591675	12.9255619049072	13.5662355422974	12.4956731796265	12.8801765441895	12.3513040542603	13.0931482315063	12.7896327972412	POP4	K7EQV2;O95707
16.3973369598389	16.6443328857422	16.5222549438477	16.5577850341797	16.6029090881348	16.6841526031494	16.5049858093262	16.7031364440918	16.5719947814941	16.6528968811035	FARSA	K7ER00;Q9Y285
14.4608001708984	14.1895303726196	14.20774269104	14.1315412521362	14.1276426315308	14.2346343994141	14.2018070220947	14.5088195800781	14.1717567443848	14.3200788497925	EIF3K	K7ERF1;Q9UBQ5
19.8653507232666	19.9690780639648	19.8269729614258	19.9203433990479	19.8789539337158	20.0644931793213	19.7014274597168	19.8454246520996	19.7998352050781	19.8582572937012	RPL22	K7ERI7;P35268
14.0588932037354	14.4825744628906	13.78173828125	14.2317953109741	14.4617986679077	14.621413230896	14.1092910766602	14.1969366073608	14.1507520675659	14.4820117950439	TK1	K7ERJ1;K7ERV3;K7ES52;P04183
16.2306251525879	16.0237369537354	16.1242542266846	15.9915075302124	16.1366367340088	15.9634799957275	15.9260215759277	15.9752788543701	16.0763854980469	15.9253273010254	MRPL4	K7ES61;Q9BYD3
13.2834119796753	10.1104536056519	12.0019359588623	12.8065052032471	10.4459981918335	12.340235710144	12.5163669586182	11.8657112121582	11.5461463928223	12.2020397186279	TXNL4A	K7ESL1;P83876
13.4810638427734	13.1939382553101	13.2266368865967	13.1884994506836	12.3214120864868	12.7598628997803	12.9421052932739	12.3650217056274	13.0235414505005	12.9439859390259	GHDC	K7ESN3;Q8N2G8
15.4037714004517	14.597728729248	14.2015600204468	14.5386343002319	14.303168296814	14.5063848495483	14.5961418151855	14.2510442733765	13.9999904632568	14.3371095657349	DCAKD	K7ESP4;Q8WVC6
13.1799440383911	13.5770540237427	13.8280220031738	13.6807069778442	13.8393707275391	13.6277666091919	13.9814319610596	13.5861101150513	13.8362531661987	13.2727375030518	SLC35A4	L0R6Q1
12.9510269165039	12.7834243774414	12.8221569061279	12.7709856033325	12.8867492675781	12.844464302063	12.9171590805054	12.9039134979248	12.9222583770752	12.806022644043	ASDURF;ASDURF;;ASDURF	L0R819;U3KQ49;U3KQP1;U3KQP6
12.9173402786255	13.7578153610229	13.6854553222656	13.8604278564453	13.9177951812744	13.6343774795532	13.6410493850708	13.6161870956421	13.4816923141479	13.5556583404541	MIEF1	L0R8F8
14.4425411224365	14.1411962509155	14.3615198135376	14.3645877838135	14.1868667602539	14.086895942688	14.2647972106934	13.7657175064087	14.0947589874268	14.0319309234619	SARS2	M0QWZ7;Q9NP81
16.6038551330566	16.4698352813721	16.3970813751221	16.4789123535156	16.4206867218018	16.516487121582	16.3898544311523	16.4102001190186	16.4485664367676	16.5718879699707	COPE	M0QXB4;O14579
13.9004020690918	13.8924036026001	13.4892234802246	14.1062612533569	13.8523540496826	13.5635080337524	12.8256883621216	12.8153295516968	13.384859085083	13.3261489868164	TXN2	M0QXH0;Q99757
16.0403270721436	15.4365167617798	15.7563781738281	15.7181262969971	15.3886566162109	15.490517616272	15.8001556396484	15.2430505752563	15.6650323867798	15.5293951034546	NUP62	M0QXN5;P37198
3.05785799026489	12.6730728149414	15.3934669494629	15.4062662124634	15.0716428756714	15.4274559020996	15.2346696853638	13.851222038269	14.921462059021	14.0308790206909	USF2	M0QXT0;Q15853
13.9725570678711	13.7185535430908	14.1340627670288	14.0953283309937	14.0164632797241	13.7201328277588	13.8988552093506	13.7963390350342	13.997052192688	13.9277687072754	ZC3H4	M0QY97;Q9UPT8
14.8461055755615	14.6577234268188	14.9098491668701	14.7116842269897	14.6532526016235	14.5641574859619	15.019871711731	14.6762914657593	14.8343505859375	14.8726301193237	PIH1D1	M0QYA2;Q9NWS0
15.005425453186	14.259578704834	14.4083099365234	14.6191120147705	14.088116645813	13.8339862823486	14.572657585144	14.5702838897705	14.6275367736816	14.2162027359009	RCN3	M0QYB8;M0QZH0;Q96D15
16.2167530059814	16.3493843078613	16.0379047393799	16.0459594726563	16.6770973205566	16.1009292602539	15.7583875656128	15.9260787963867	16.0238723754883	15.7080755233765	AP2S1	M0QYZ2;M0R0N4;P53680
11.5469694137573	12.1892833709717	12.5878763198853	12.2462921142578	12.2499103546143	12.2974729537964	12.6142024993896	11.7159633636475	12.2816781997681	12.5309257507324	SIRT6	M0QZ09;Q8N6T7
18.957405090332	18.9176731109619	16.7721099853516	18.774787902832	18.6421947479248	18.6452236175537	15.855770111084	18.3943653106689	18.5798969268799	18.4632549285889	HNRNPM	M0QZM1
14.1645231246948	14.2333641052246	14.1054620742798	14.2616996765137	13.9700107574463	14.3970403671265	14.3389759063721	14.3003025054932	14.3495006561279	14.3210954666138	ARHGEF1	M0QZR4;Q92888
12.6713275909424	13.090970993042	12.6761789321899	13.0064754486084	12.4979848861694	13.6302099227905	13.0967893600464	13.3072681427002	13.5218276977539	13.4848890304565	GINS2	M0R043;Q9Y248
19.9065265655518	19.5652351379395	19.5613117218018	19.6480178833008	19.4022903442383	19.5231475830078	19.5840911865234	19.5052852630615	19.5651302337646	19.4876365661621	KHSRP	M0R0C6;Q92945
18.2313899993896	18.2123832702637	18.0756320953369	18.2030048370361	18.147970199585	18.2589836120605	18.1394577026367	18.2453918457031	18.0331268310547	18.2581386566162	RPS5	M0R0F0;P46782
12.9389505386353	12.949535369873	12.8658542633057	12.989953994751	12.8178768157959	13.1525354385376	13.1599407196045	13.1522531509399	12.9073925018311	12.8961582183838	MYO9B	M0R0P8;M0R300;Q13459
15.6531810760498	16.1836547851563	16.1707725524902	16.0750370025635	16.2558212280273	16.0872116088867	16.0855484008789	16.5498218536377	16.1558246612549	16.2970848083496	NAPA	M0R0Y2;P54920
16.8239116668701	16.5446453094482	16.3811683654785	16.5379180908203	16.4605960845947	16.6136856079102	16.1282978057861	14.9752616882324	16.2194881439209	16.1464653015137	RPL18A	M0R117;Q02543
14.8919620513916	14.6455736160278	15.2733945846558	14.8104152679443	15.1219215393066	14.9586057662964	15.1593551635742	14.3526220321655	15.3428249359131	14.5940628051758	EMC8	M0R1B0;O43402
14.3011541366577	13.4964981079102	13.5006008148193	13.779091835022	13.5618562698364	13.4562129974365	13.1598138809204	13.223690032959	13.4825563430786	13.1531658172607	MRPL34	M0R226;Q9BQ48
15.9181003570557	15.1932640075684	15.455714225769	15.5965852737427	15.2367010116577	15.4296760559082	15.3284587860107	14.9831781387329	15.1069803237915	15.0017929077148	EMC10	M0R2A0;Q5UCC4
16.1103096008301	15.8331127166748	16.0852127075195	15.9992027282715	15.9154567718506	15.8168268203735	15.9939050674438	15.9144687652588	15.9297857284546	15.7711896896362	SUGP2	M0R2Z9;Q8IX01
12.5328149795532	12.8914194107056	13.0499210357666	13.0540351867676	12.6532421112061	13.0261535644531	13.5058059692383	12.5439205169678	12.9006433486938	12.720853805542	NOSIP	M0R3B2;Q9Y314
14.9134769439697	14.8069181442261	14.5270204544067	14.8000564575195	14.8192930221558	14.7406940460205	14.4579029083252	14.1907644271851	14.151834487915	14.3389387130737	RABAC1	M0R3D4;Q9UI14
16.9411354064941	17.0502529144287	17.0328216552734	17.3237705230713	16.9159393310547	17.247486114502	17.6846714019775	17.306510925293	17.1869297027588	17.3580627441406	;NEDD8	NEDD8_HUMAN;Q15843
17.2826175689697	17.6665210723877	17.349702835083	17.375846862793	17.7082977294922	17.8066272735596	17.7330379486084	17.66575050354	17.6252212524414	17.8340511322021	;NQO1	NQO1_HUMAN;P15559
15.6920680999756	16.0328216552734	15.8864049911499	15.8752727508545	15.9087266921997	15.9561834335327	16.1549034118652	16.2789325714111	15.9977788925171	16.1920433044434	;NQO2;NQO2	NQO2_HUMAN;P16083;Q5TD07
15.4359912872314	15.0419578552246	15.0497350692749	15.237491607666	14.8773832321167	15.06813621521	14.8680028915405	14.6311254501343	14.9653949737549	15.0093860626221	DNASE2	O00115
17.7867698669434	17.589298248291	17.7097129821777	17.7126693725586	17.8348445892334	17.6661777496338	17.5479507446289	17.6414203643799	17.714958190918	17.529857635498	AGPS	O00116
15.4759483337402	15.9675512313843	15.6216726303101	15.8426666259766	15.935772895813	15.862099647522	15.3495569229126	15.0861825942993	16.3041133880615	15.4574537277222	DDX39A	O00148
17.4610538482666	17.4423503875732	17.3434753417969	17.5066051483154	17.4503746032715	17.6437149047852	17.6984176635742	17.6266822814941	17.4819793701172	17.6251983642578	PDLIM1	O00151
17.3574600219727	17.6430416107178	17.3610496520996	17.5620460510254	17.5664329528809	17.6928424835205	17.5885257720947	17.9314575195313	17.523998260498	17.8006858825684	ACOT7	O00154
16.4057445526123	16.2596244812012	16.2788181304932	16.4745388031006	16.3946514129639	16.1335582733154	16.1622905731201	16.277759552002	16.2106113433838	16.2292995452881	SNAP23	O00161
13.3927230834961	12.5432786941528	12.7379379272461	12.7275857925415	12.4726028442383	12.7161712646484	12.6956844329834	11.9800386428833	12.1768274307251	12.3740568161011	HAX1	O00165
14.6928739547729	14.6933994293213	14.6534109115601	14.6264696121216	14.7786731719971	14.7227544784546	14.711501121521	14.9315042495728	14.876971244812	14.7394638061523	AIP	O00170
14.36985206604	14.7639112472534	14.5091114044189	14.6669130325317	14.5830087661743	14.570348739624	14.7677793502808	14.9942750930786	14.618540763855	14.6756019592285	GTPBP1	O00178
15.02756690979	14.8900165557861	14.935338973999	14.7921094894409	15.0992259979248	14.8230514526367	14.7380857467651	15.2880163192749	14.9074440002441	14.9028072357178	STXBP3	O00186
19.0190296173096	19.3811779022217	19.3624534606934	19.1483840942383	19.3770618438721	19.3471755981445	19.2364864349365	19.8697681427002	19.4005260467529	19.5091094970703	AP3B1	O00203
13.5767812728882	12.8271007537842	12.3582820892334	13.0344429016113	12.5587282180786	13.129358291626	12.5378036499023	11.8974561691284	13.2187690734863	12.7517337799072	LGALS8	O00214
13.3573751449585	11.2223978042603	12.0338411331177	12.2178564071655	12.6499052047729	12.0760192871094	12.3609027862549	11.3205108642578	11.9376077651978	12.7499465942383	NFKBIE	O00221;Q7LC14
17.9814701080322	18.2687721252441	18.2065677642822	18.1529235839844	18.4706878662109	18.2874851226807	18.2215423583984	18.3390426635742	18.2997455596924	18.2975521087646	PSMD11	O00231
17.1120014190674	17.6114406585693	17.5533790588379	17.4395980834961	17.8157920837402	17.6363868713379	17.5842342376709	17.6664714813232	17.6796493530273	17.6312313079834	PSMD12	O00232
19.2576217651367	18.6739616394043	18.7140731811523	18.8013572692871	18.5631484985352	18.5894908905029	18.5757942199707	18.4955272674561	18.6198635101318	18.5614929199219	PGRMC1	O00264
15.5740356445313	15.5495872497559	15.6972312927246	15.67955493927	15.5845365524292	15.630184173584	15.6161727905273	15.2130899429321	15.5803604125977	15.5997247695923	SUPT5H	O00267
15.1147136688232	15.2816743850708	15.3313426971436	15.2219314575195	15.2349615097046	15.220724105835	15.5732107162476	15.5173835754395	15.4694147109985	15.3649663925171	DFFA	O00273
20.2679138183594	20.0177669525146	19.604829788208	19.8344745635986	19.8706302642822	20.070728302002	19.8873329162598	20.4070568084717	19.7780780792236	20.2271900177002	CLIC1	O00299
14.1531047821045	13.782600402832	14.1385831832886	14.1101417541504	14.2764568328857	13.7521066665649	14.2319478988647	14.0894556045532	14.0168504714966	13.5243473052979	PDHX	O00330
14.6178369522095	14.3905744552612	13.8460493087769	14.5207891464233	13.7783241271973	14.145751953125	14.1700716018677	13.8032178878784	13.9362783432007	14.4953136444092	QSOX1	O00391
14.4402103424072	14.3644933700562	14.1419305801392	14.2951574325562	14.1493186950684	14.1232299804688	13.8231811523438	14.2585458755493	14.1565074920654	14.1676950454712	DCTN6	O00399
13.7267293930054	13.9411239624023	14.1055202484131	13.9930534362793	13.8792676925659	14.0785636901855	14.2129402160645	14.2491140365601	14.1898069381714	14.1215114593506	WASL	O00401
15.9263648986816	16.6965770721436	16.4983158111572	16.4085216522217	16.8804454803467	16.6992111206055	16.6042385101318	16.9305667877197	16.7157802581787	16.8756561279297	IPO5	O00410
13.5927200317383	14.4071178436279	14.1265468597412	14.2604923248291	14.4480323791504	14.2691268920898	13.9875373840332	13.366584777832	13.9970827102661	13.930492401123	POLRMT	O00411
14.896674156189	15.4816207885742	13.3466205596924	13.5430469512939	12.8061075210571	14.3550090789795	13.5474433898926	14.4820976257324	13.925048828125	14.5629348754883	EEF2K	O00418
12.6866493225098	14.7022352218628	14.8102540969849	14.9064245223999	15.1511602401733	14.3241815567017	14.9456701278687	14.0415506362915	14.904914855957	14.305775642395	SAP18	O00422
15.7431039810181	15.8305759429932	15.8252964019775	15.7508096694946	15.7368946075439	15.6802415847778	15.880012512207	15.9322566986084	15.851300239563	15.8597316741943	IGF2BP3	O00425
18.2495517730713	18.407283782959	18.2290172576904	18.2761707305908	18.2898788452148	18.3538188934326	18.4259414672852	18.3734149932861	18.3648242950439	18.4265689849854	DNM1L	O00429
13.0143394470215	13.4504861831665	13.348931312561	13.3305892944336	13.3136463165283	13.4604482650757	13.2247533798218	14.1296434402466	13.312557220459	13.5144662857056	RTCA	O00442
11.4475049972534	11.7804250717163	12.1082820892334	11.7673683166504	11.8854417800903	10.7322015762329	12.3143844604492	11.6412286758423	11.8859262466431	11.9098625183105	PIK3C2A	O00443
15.1063747406006	15.4248676300049	15.5990924835205	15.5007629394531	15.4814653396606	15.3813753128052	15.5710210800171	15.5068597793579	15.5966300964355	15.4874639511108	GOLIM4	O00461
12.7550621032715	14.3651666641235	14.5061206817627	14.2709760665894	14.5539960861206	14.4262762069702	14.6340436935425	14.7920694351196	14.363245010376	14.2644653320313	EXOC5	O00471
12.4592761993408	12.1407690048218	10.5508012771606	11.7745304107666	11.3335037231445	14.2427387237549	13.0889549255371	13.5703887939453	9.60717678070068	10.5754022598267	HMGN4	O00479
17.1959648132324	16.7805995941162	16.5518341064453	16.758243560791	16.4010562896729	16.6528301239014	16.5085697174072	16.2706909179688	16.5310916900635	16.4565849304199	NDUFA4	O00483
17.0845375061035	17.2913627624512	17.1712779998779	17.1057872772217	17.4843044281006	17.3106422424316	17.1002883911133	17.2527351379395	17.3104572296143	17.3064155578613	PSMD14	O00487
15.249002456665	14.6393442153931	14.9869384765625	14.9343996047974	14.6773738861084	14.9392471313477	14.9671611785889	14.6881456375122	14.7947254180908	14.531566619873	ZNF593	O00488
16.1973438262939	16.4429206848145	16.4819946289063	16.5417633056641	16.5474987030029	16.6494674682617	16.5519256591797	16.6944713592529	16.55153465271	16.7318954467773	BIN1	O00499
16.2329864501953	16.036922454834	16.0087280273438	15.9399013519287	16.1244945526123	16.166675567627	15.9563856124878	16.2907867431641	16.0881366729736	16.1108303070068	KPNA3	O00505
15.0075607299805	15.1931324005127	15.2271003723145	15.2430057525635	15.2105875015259	15.211597442627	15.2415466308594	15.4248018264771	15.2898054122925	15.2892770767212	STK25	O00506
16.4175548553467	15.9421253204346	16.2565059661865	15.8797407150269	16.629602432251	15.9801902770996	16.3574180603027	16.7320556640625	16.307222366333	16.2050018310547	SDCBP	O00560
14.2288036346436	14.0003156661987	14.5290126800537	14.2513208389282	14.0533037185669	14.0880279541016	14.3184328079224	14.1203985214233	14.2691679000854	14.0634994506836	MPHOSPH10	O00566
18.2159099578857	18.0705013275146	18.2579078674316	18.2115955352783	18.0644149780273	18.1177978515625	18.0390682220459	17.8335628509521	18.0915012359619	17.9502964019775	NOP56	O00567
16.7932720184326	17.1799564361572	16.9975776672363	17.227331161499	16.8736400604248	17.1258907318115	17.0147304534912	16.7750778198242	17.1664123535156	17.2250308990479	PODXL	O00592
13.5303268432617	13.4556522369385	13.8290967941284	13.9320116043091	14.1671199798584	13.6926670074463	12.7291316986084	13.6326427459717	13.4263162612915	13.3181457519531	CCN1	O00622
16.224458694458	16.3227672576904	16.0556583404541	15.9981575012207	15.8466539382935	16.0784473419189	16.3160572052002	16.0714492797852	16.1806659698486	16.340913772583	PIR	O00625
15.2716989517212	15.4217567443848	15.1711826324463	15.2403984069824	15.4092350006104	15.4486169815063	15.2593383789063	15.6531438827515	15.1783170700073	15.4830904006958	PPP6C	O00743
14.6198482513428	13.8393821716309	14.0151519775391	13.9010314941406	13.8317880630493	13.3997077941895	13.9806308746338	14.2990627288818	14.23681640625	14.2420415878296	CES2	O00748
18.4165649414063	18.3904075622559	18.492618560791	18.3480930328369	18.3876075744629	18.2795658111572	18.4105777740479	18.2998485565186	18.4024620056152	18.2635517120361	MAN2B1	O00754
12.8450880050659	13.3467254638672	13.1109638214111	13.4701766967773	13.4718599319458	13.2887763977051	13.2678556442261	12.7632713317871	13.1311931610107	12.9483118057251	UBE2C;	O00762;UBE2C_HUMAN
17.4636192321777	18.0404720306396	17.7715282440186	17.8391170501709	17.9493675231934	17.9647388458252	17.885461807251	18.2567195892334	17.8279304504395	18.1467342376709	PDXK	O00764
12.9504089355469	12.582649230957	11.8086891174316	13.0639457702637	12.358325958252	12.6367082595825	11.894721031189	11.1352958679199	9.31676292419434	11.3921213150024	CLDN4	O14493
11.6637363433838	12.7281093597412	12.7408933639526	12.1485443115234	12.4238538742065	12.7736434936523	12.4285087585449	12.1487197875977	11.8402700424194	12.6267910003662	ARID1A	O14497
14.601598739624	13.5517978668213	14.1028852462769	14.5178203582764	13.0938501358032	13.6587085723877	14.3946504592896	14.4100036621094	13.998348236084	14.2041711807251	CDK2AP1	O14519
12.9369668960571	13.4162673950195	13.4801721572876	13.3479413986206	13.4987659454346	13.837908744812	13.3692083358765	14.027889251709	13.3247575759888	13.8594188690186	TXNDC9	O14530
11.2052602767944	12.034987449646	11.7683610916138	11.9106788635254	11.8805685043335	12.0631122589111	12.7278900146484	11.7533750534058	10.5617427825928	11.6784963607788	TRAFD1	O14545
14.3097047805786	14.8076906204224	14.46657371521	14.6616687774658	14.7157802581787	14.3018836975098	14.3356122970581	14.0989789962769	14.4466676712036	14.5224351882935	COX7A2L	O14548
12.9848880767822	13.3130931854248	13.3971738815308	13.3345994949341	13.2233953475952	13.0986919403076	13.1088581085205	13.2603597640991	13.1814851760864	13.0482769012451	CYB561D2;	O14569;U3KQU4
14.9999599456787	14.9413795471191	14.9581909179688	14.9797639846802	14.8485660552979	14.9986305236816	15.1143531799316	15.1107196807861	14.8804044723511	14.915244102478	CIT	O14578
16.2894248962402	16.4076957702637	16.2485694885254	16.420581817627	16.4030838012695	16.5890293121338	16.1528720855713	16.573070526123	16.4422340393066	16.3197708129883	EIF1AY;EIF1AX	O14602;P47813
12.4415349960327	12.7795333862305	13.3551826477051	12.7946481704712	11.3609304428101	13.418044090271	13.1838941574097	12.3172903060913	14.1109762191772	11.7292966842651	CDC42EP2	O14613
15.5455303192139	15.6364345550537	15.6845951080322	15.569450378418	15.66282081604	15.5228538513184	15.7392768859863	15.8915681838989	15.7177505493164	15.7740154266357	AP3D1	O14617
16.4128551483154	16.6132984161377	16.7481880187988	16.7018184661865	16.8450260162354	16.6952781677246	16.477710723877	16.1659240722656	16.8344669342041	16.3732624053955	CHD1	O14646
14.1640148162842	14.3821353912354	14.3844308853149	14.1550407409668	14.7836484909058	14.2561979293823	14.2550382614136	13.3964920043945	14.3139448165894	14.2828016281128	CHD2	O14647
15.2817459106445	15.0285177230835	15.072922706604	15.1422176361084	15.1461629867554	14.9162931442261	14.4364538192749	14.640230178833	15.0008382797241	14.7563056945801	TOR1A	O14656
11.8707237243652	13.9105062484741	13.09437084198	13.2364206314087	12.6742544174194	13.0236215591431	12.9192152023315	12.7422342300415	12.7512683868408	12.5975389480591	TOR1B	O14657
16.1848278045654	16.1912403106689	16.2757110595703	16.1776638031006	16.3855247497559	16.0536022186279	15.9614667892456	16.2066631317139	16.1839160919189	16.0633010864258	ADAM10	O14672
17.072093963623	16.8756580352783	16.7822952270508	16.916597366333	16.7809219360352	16.8797931671143	16.7921333312988	16.720272064209	16.8751544952393	16.9504909515381	PTGES	O14684
16.6690807342529	15.8142194747925	15.6793270111084	15.4917593002319	15.9934597015381	15.6404638290405	16.5064373016357	16.5173645019531	16.6283721923828	16.5626029968262	IMPA2	O14732
14.6431751251221	14.9321336746216	14.8750667572021	14.8316631317139	14.6248750686646	14.8337755203247	14.7714519500732	13.2784976959229	14.7788991928101	14.4930057525635	MAP2K7	O14733
17.9657135009766	18.0495262145996	17.9299087524414	18.0659484863281	17.8223209381104	18.2389316558838	18.0930061340332	18.3369235992432	18.1310443878174	18.1852569580078	PDCD5	O14737
14.8756904602051	14.9438514709473	15.0753908157349	15.0124549865723	15.1188554763794	14.9728221893311	15.0531616210938	15.1808490753174	15.0305891036987	15.136775970459	PRMT5	O14744
15.5973091125488	15.5062036514282	15.6394834518433	15.6912622451782	15.3983011245728	15.534441947937	15.7799825668335	15.6184482574463	15.6146230697632	15.5944061279297	SLC9A3R1	O14745
14.711350440979	14.6534948348999	14.591212272644	14.6644926071167	14.7545948028564	14.7293176651001	14.7939443588257	14.7890872955322	14.8162403106689	14.7296600341797	NDC80	O14777
13.8823642730713	13.8828268051147	14.0868034362793	13.8218221664429	13.8374271392822	13.9214992523193	13.8536291122437	14.4732475280762	13.9376792907715	14.0866632461548	TNPO2	O14787
18.5834331512451	18.5663146972656	18.491720199585	18.5065517425537	18.5525722503662	18.5823879241943	18.4808559417725	18.3020038604736	18.5259304046631	18.5224857330322	PSMA7	O14818
16.2479362487793	15.8753929138184	16.0845031738281	16.068172454834	15.9136343002319	15.8996114730835	16.0531578063965	16.0190906524658	15.97678565979	15.9283723831177	SCAMP3	O14828
14.7708625793457	14.6367444992065	14.8001794815063	14.7530832290649	14.4519081115723	14.5011043548584	14.4019632339478	13.9409942626953	14.5660982131958	14.3855619430542	BCKDK	O14874
14.0892000198364	11.9428119659424	13.6339483261108	13.0772256851196	12.7122049331665	13.0319805145264	13.5710887908936	12.7242879867554	13.4604654312134	13.3318653106689	IFIT3	O14879
16.197732925415	16.6198425292969	16.5477428436279	16.2569274902344	17.1235256195068	16.3430137634277	16.0298900604248	15.9576835632324	16.6610126495361	16.2489776611328	MGST3	O14880;Q5VV89
13.6530780792236	14.2652254104614	14.0363178253174	14.079701423645	14.2031259536743	14.660138130188	14.4164018630981	14.8327932357788	14.0879220962524	14.4774217605591	TAX1BP3	O14907
13.8026351928711	14.5515508651733	14.5472087860107	14.5822658538818	14.6296939849854	14.8003082275391	14.6560010910034	14.7356958389282	14.7064619064331	14.7258749008179	GIPC1	O14908
14.5266828536987	14.5698022842407	14.7456951141357	14.9093627929688	14.8417510986328	14.9079895019531	14.7093572616577	14.8228578567505	14.7380123138428	14.6198720932007	TIMM23	O14925
15.5972309112549	16.1332397460938	15.9508333206177	15.9476547241211	16.221923828125	16.1684398651123	15.9761819839478	16.2055797576904	16.1126499176025	16.0547275543213	HAT1	O14929
13.8581962585449	13.079044342041	12.6841154098511	13.1406059265137	13.4619560241699	13.4724493026733	13.3326625823975	12.5149993896484	13.2808952331543	13.4003849029541	UBE2L6	O14933
16.7161426544189	16.5215740203857	16.6494960784912	16.5521717071533	16.6054763793945	16.4557228088379	16.3934516906738	16.3097820281982	16.5413017272949	16.3987922668457	UQCRQ	O14949
10.2551889419556	11.2184963226318	11.7988176345825	11.2509298324585	11.3915987014771	11.3674869537354	11.9316473007202	10.4803791046143	11.0240898132324	10.7736492156982	AURKA	O14965
13.7908315658569	13.7132921218872	14.3669729232788	14.0696468353271	14.4111862182617	14.1874351501465	14.2462272644043	14.1726741790771	14.2036399841309	14.2454662322998	RAB29	O14966
17.4346008300781	17.308910369873	17.3468894958496	17.2924518585205	17.2662944793701	17.2218151092529	17.3855781555176	17.2941226959229	17.3077163696289	17.3186569213867	PPP1R12A	O14974
16.439769744873	16.3246440887451	16.0278835296631	16.2686634063721	15.8012437820435	16.2467670440674	16.2505874633789	16.3373050689697	16.2415180206299	16.3506774902344	GAK	O14976
8.85324478149414	8.33858489990234	8.5078592300415	10.9340696334839	7.84242343902588	9.28736877441406	10.6712999343872	9.39289283752441	3.37218260765076	9.7858715057373	ZNF609	O15014
16.1157836914063	16.0504760742188	16.0777969360352	16.1613998413086	15.8510999679565	16.1527843475342	16.1102905273438	16.0766258239746	16.0623722076416	16.0818538665771	SEC16A	O15027
16.014066696167	16.1471939086914	16.2593841552734	16.1209411621094	16.2247467041016	15.9140911102295	16.0259418487549	15.9698457717896	16.1748561859131	16.0028762817383	PLXNB2	O15031
15.7195434570313	15.2876720428467	15.7996635437012	15.6051864624023	15.7247924804688	15.6146507263184	15.6368732452393	15.2837038040161	15.5742044448853	15.2611522674561	U2SURP	O15042
12.6613149642944	12.6211175918579	12.5267772674561	12.5498857498169	12.0857849121094	12.7030248641968	12.6895532608032	12.6679039001465	12.4114980697632	12.5029592514038	KIF3B	O15066
15.4808044433594	15.9284372329712	15.8122301101685	15.988597869873	15.673810005188	15.9205837249756	16.0584392547607	15.907600402832	15.9062557220459	16.0729312896729	PFAS	O15067
15.5139617919922	14.4587144851685	15.6562547683716	13.8524551391602	15.8396072387695	13.1632328033447	15.5190343856812	15.2839994430542	14.897274017334	15.7252254486084	ANKRD28	O15084
13.2646608352661	13.2824382781982	13.5028162002563	13.3383569717407	13.1478729248047	13.4771146774292	13.2049140930176	12.845085144043	12.9364404678345	13.0316171646118	PRORP	O15091
15.1028604507446	15.1070642471313	15.0402898788452	15.0711517333984	14.8191432952881	15.1223373413086	15.1946315765381	14.9284687042236	15.1362915039063	15.056342124939	LSM1	O15116
15.5459289550781	15.4205389022827	15.882342338562	15.3630132675171	16.0481643676758	15.4177465438843	15.8699626922607	15.6904850006104	16.0470275878906	15.6109228134155	NPC1	O15118
14.9909191131592	15.1828384399414	15.1018896102905	15.290319442749	15.0993213653564	15.1032743453979	15.1168355941772	14.1637859344482	14.965558052063	14.789454460144	DEGS1	O15121
16.2016735076904	15.6640691757202	15.9325227737427	15.8747005462646	15.5055885314941	15.5513830184937	15.8373994827271	15.6113986968994	15.5526914596558	15.576078414917	SCAMP2	O15127
16.831729888916	16.4979248046875	16.3430614471436	16.6354103088379	15.8158903121948	16.5222282409668	16.546817779541	15.9401111602783	16.2933712005615	16.5645236968994	ARPC1B	O15143
15.8749628067017	17.106912612915	16.9501304626465	16.6708850860596	17.4242362976074	17.020809173584	17.0123977661133	17.3034362792969	17.2204132080078	17.2499389648438	ARPC2	O15144
18.1733722686768	18.4767990112305	18.2056617736816	18.1881771087646	18.3918762207031	18.3446998596191	18.5064735412598	18.6063270568848	18.3719940185547	18.5454750061035	ARPC3	O15145
17.1458473205566	16.9347038269043	17.0946941375732	16.9021816253662	16.8944454193115	16.9494895935059	16.9961071014404	17.0103721618652	16.901195526123	16.9453887939453	POLR1C	O15160
18.8859329223633	18.4186744689941	18.547248840332	18.5675182342529	18.4619293212891	18.4385395050049	18.4265613555908	18.4066905975342	18.4309539794922	18.3316287994385	PGRMC2	O15173
17.4688472747803	16.9887828826904	17.1114044189453	17.180685043335	16.9639835357666	17.2840251922607	17.2752552032471	16.9580688476563	16.942268371582	17.0249977111816	PFDN6	O15212
15.2716646194458	14.8375406265259	15.1741943359375	15.1668519973755	14.9411544799805	14.9481058120728	14.8126497268677	14.6285133361816	14.7846546173096	14.8243932723999	WDR46	O15213
14.9262084960938	14.6810312271118	15.2099103927612	15.0944681167603	14.796350479126	14.6819047927856	14.9563884735107	14.6134338378906	14.629843711853	14.5975465774536	NKRF	O15226
15.5369672775269	15.0863647460938	14.9045248031616	15.2760314941406	15.1503200531006	15.209755897522	14.6074991226196	15.4370584487915	14.832501411438	15.1998605728149	GNPAT	O15228;Q5TBH8
15.7461776733398	15.9263553619385	15.8810625076294	15.6225395202637	16.0683212280273	15.5804824829102	15.6189575195313	15.292103767395	15.905369758606	15.7130126953125	LAMA5	O15230
16.7899761199951	16.8536968231201	16.7181758880615	16.9501838684082	16.7460498809814	16.8971042633057	16.8362159729004	16.9198722839355	16.6943778991699	16.8964233398438	ZNF185	O15231
12.4684925079346	12.783989906311	12.7599668502808	12.6801099777222	12.3277177810669	12.8240804672241	12.4880380630493	12.7978372573853	12.4635248184204	12.6994295120239	CASC3	O15234
14.1125497817993	13.127513885498	13.7648115158081	13.3940811157227	13.4275140762329	13.5555982589722	13.7688293457031	13.285192489624	13.6725587844849	13.6364774703979	MRPS12	O15235
14.4969062805176	15.0176773071289	15.1760673522949	15.0279140472412	15.6045198440552	14.8974189758301	15.2249889373779	15.2324142456055	15.233268737793	15.0764541625977	RER1	O15258
17.4430809020996	17.0203418731689	17.0406246185303	17.1814804077148	17.131706237793	16.9956512451172	16.9165077209473	17.2198486328125	16.9955348968506	17.2709884643555	SURF4	O15260;Q5T8U5
15.9820318222046	16.1372470855713	16.1275653839111	16.1839847564697	16.07102394104	16.0324459075928	15.9145011901855	16.1773357391357	16.0660858154297	16.0469207763672	SPTLC1	O15269
14.8462991714478	15.1668300628662	15.110860824585	15.1489858627319	15.1076765060425	15.0384397506714	14.8163318634033	15.0916814804077	15.0360746383667	15.1108131408691	SPTLC2	O15270
14.8790740966797	15.1019830703735	15.2898712158203	15.0710039138794	15.2510805130005	14.9087924957275	15.2974443435669	15.2291622161865	15.2050638198853	15.0312786102295	OGT	O15294
14.8640823364258	14.3268270492554	13.9339637756348	14.4184637069702	14.183464050293	14.3970928192139	14.4732866287231	14.2634553909302	13.707612991333	14.2685146331787	PMM2	O15305
18.046911239624	17.7473106384277	17.6752376556396	17.8114490509033	17.5728988647461	17.8133411407471	17.8452949523926	17.6474170684814	17.6623573303223	17.7072353363037	HMGB3	O15347
16.9048500061035	16.7113304138184	16.7067852020264	16.765625	16.6874694824219	16.8722858428955	16.9183940887451	16.8835945129395	16.7740840911865	16.8113422393799	PPM1G	O15355
15.0069351196289	14.7656373977661	14.9774389266968	14.8858652114868	14.5762901306152	14.5602970123291	14.9645462036133	14.7343196868896	14.7172336578369	14.8490495681763	INPPL1	O15357
16.5822982788086	16.8556652069092	16.7619171142578	16.8003807067871	16.8678607940674	16.9624614715576	16.738826751709	16.8963756561279	16.7328624725342	16.7970409393311	EIF3D	O15371
13.4712409973145	12.7092227935791	13.1481056213379	12.9549798965454	12.9466562271118	12.9822778701782	13.1231212615967	12.8750324249268	12.5509443283081	12.9406127929688	HDAC3	O15379
13.7127752304077	14.0837535858154	13.8625936508179	13.9472427368164	13.9757871627808	13.942852973938	14.0774364471436	14.5072984695435	14.0342950820923	14.1428861618042	IPO8	O15397
16.5455589294434	16.1126041412354	16.2482833862305	16.3321914672852	15.9781665802002	15.925464630127	16.117582321167	16.0559844970703	16.0425510406494	16.0162105560303	STX7	O15400
15.1057415008545	15.4434928894043	15.5879144668579	15.6143312454224	15.5943641662598	15.6454658508301	15.4900274276733	15.6343812942505	15.4683609008789	15.5196962356567	SLC31A1	O15431
14.4553937911987	14.2591409683228	14.6483821868896	14.3970766067505	14.0678796768188	13.8256521224976	14.2616939544678	14.0438432693481	14.3969812393188	14.1885538101196	ABCC4	O15439
15.2434606552124	14.8507137298584	15.1806468963623	15.432746887207	14.877293586731	15.0476837158203	15.303334236145	15.0020179748535	14.9717884063721	15.009822845459	POLR1G	O15446
15.6188564300537	16.2543201446533	15.8154020309448	16.1916561126709	16.0662708282471	16.2130870819092	15.6036357879639	16.0508270263672	15.8918123245239	16.3157520294189	P4HA2	O15460
17.2903518676758	17.6091976165771	17.513671875	17.5629692077637	17.7740497589111	17.6842575073242	17.5787124633789	18.0504989624023	17.5922546386719	17.7691879272461	ARPC5	O15511
13.4203414916992	13.2070589065552	13.4710159301758	13.3814039230347	13.5157556533813	13.1044950485229	13.7315378189087	12.5100259780884	13.0311813354492	13.1880369186401	MAFG;MAFK	O15525;O60675
12.7530927658081	12.9774293899536	12.8587741851807	12.8424158096313	12.7343368530273	13.0404930114746	13.1299486160278	13.085898399353	12.8289442062378	12.9625644683838	RNF113A	O15541
17.6248149871826	17.6571750640869	17.7576484680176	17.7002983093262	17.8094577789307	17.615104675293	17.5937519073486	17.6492118835449	17.6880035400391	17.5371036529541	DHX15	O43143
14.1886024475098	14.9537057876587	15.0937519073486	14.9490242004395	15.1916484832764	14.8613424301147	15.0088958740234	15.183539390564	15.1398591995239	15.1636209487915	RNMT	O43148
13.4513931274414	14.1321315765381	13.2352933883667	11.5199327468872	13.5900039672852	13.1492538452148	10.2664089202881	13.0777254104614	12.9273519515991	13.2715473175049	ZZEF1	O43149
13.0647258758545	12.1192903518677	12.4995946884155	12.4290971755981	12.1803855895996	12.0380735397339	12.5952997207642	11.7097206115723	12.1665468215942	12.18874168396	RRP8	O43159
11.4099721908569	12.4292268753052	12.7847671508789	12.3128652572632	12.7425403594971	12.4380235671997	13.0692615509033	12.2448387145996	12.3339157104492	12.3073682785034	PJA2	O43164
16.425479888916	16.3410415649414	16.564208984375	16.4445514678955	16.4020023345947	16.4900188446045	16.3989372253418	16.0633964538574	16.3899631500244	16.2744483947754	PRPF4	O43172
14.9355802536011	14.6225786209106	15.1506662368774	14.8511142730713	14.614333152771	14.3836011886597	14.6510992050171	14.3217487335205	14.6257600784302	14.4253921508789	NDUFS4	O43181
17.1013259887695	16.8697776794434	16.9167003631592	16.8847103118896	16.9225444793701	16.9409065246582	16.942066192627	16.8244571685791	16.7966480255127	16.8050060272217	DYNC1LI2	O43237
17.5805988311768	18.0026683807373	17.971715927124	17.8188991546631	18.2742881774902	18.0753288269043	17.9488964080811	18.0434589385986	18.0104904174805	18.0517749786377	PSMD3	O43242
14.9178295135498	14.7198505401611	14.743504524231	14.9531478881836	14.928204536438	14.9630460739136	14.9314069747925	14.6247301101685	14.8889617919922	14.7978658676147	PAPSS1	O43252
13.4744205474854	14.1220903396606	14.1500539779663	14.0393295288086	14.03053855896	14.1037616729736	14.2721500396729	14.2670450210571	14.2307243347168	13.9739990234375	ZW10	O43264
16.0688819885254	15.5419492721558	15.8414993286133	15.8224430084229	15.6468105316162	15.5980815887451	15.7290601730347	15.6306610107422	15.6326417922974	15.5292444229126	SART1	O43290
13.9728651046753	14.2358560562134	13.908863067627	14.1091394424438	13.5268983840942	14.143874168396	13.7440738677979	13.8701000213623	13.8865718841553	13.8449335098267	DAPK3	O43293
13.1362228393555	13.4360008239746	13.2863636016846	13.4278182983398	13.1870241165161	13.4796295166016	13.4493608474731	13.2655153274536	13.2830829620361	13.5732278823853	MAP3K7	O43318
15.0260095596313	14.8343000411987	14.7823524475098	14.5653076171875	14.9794301986694	14.720983505249	14.7063274383545	14.8301792144775	14.5662441253662	14.7538251876831	EEF1E1	O43324
15.3563823699951	14.5359001159668	15.3215093612671	15.3415231704712	15.1546106338501	15.5479097366333	15.6253938674927	15.6264991760254	15.4364461898804	15.5031499862671	RIPK2	O43353
18.6909694671631	18.5268287658691	18.6402111053467	18.5658740997314	18.617956161499	18.4421119689941	18.4876480102539	18.4869194030762	18.566219329834	18.3960132598877	HNRNPR	O43390
15.6657915115356	15.4608917236328	15.7257423400879	15.835337638855	15.5551052093506	15.6337099075317	15.6359167098999	15.4089279174805	15.7101612091064	15.4815397262573	PRPF3	O43395
17.7523803710938	17.9370708465576	17.7997608184814	17.8360691070557	18.1707363128662	17.9813060760498	17.9874439239502	18.3282775878906	17.944845199585	18.068359375	TXNL1	O43396
18.551326751709	18.4027423858643	18.3088054656982	18.4225769042969	18.0884799957275	18.2834491729736	18.3709106445313	18.2843627929688	18.2587947845459	18.3053894042969	TPD52L2	O43399
17.104455947876	16.9857044219971	16.7965049743652	16.98583984375	16.2373676300049	16.7186374664307	16.5748729705811	16.2063579559326	16.7363700866699	16.3624820709229	HTRA2	O43464
17.4770355224609	17.4194774627686	17.1590213775635	17.2991600036621	17.1734924316406	17.2441864013672	17.3228511810303	17.3801784515381	17.1418514251709	17.3861846923828	AKR7A2	O43488
17.9673328399658	17.7715835571289	17.7680530548096	17.8721599578857	17.7462768554688	17.8224430084229	17.692232131958	17.6785297393799	17.6735687255859	17.7121734619141	EPB41L2	O43491
15.9361696243286	14.6182041168213	14.3164901733398	14.5589685440063	14.4742517471313	15.6506433486938	15.5545568466187	15.774772644043	15.4179553985596	15.7200365066528	FOXO3	O43524
17.7758979797363	16.5469055175781	16.7165470123291	16.430212020874	16.7594776153564	16.3056831359863	16.2193088531494	16.508487701416	17.5333290100098	17.4027614593506	CA12	O43570
16.0652141571045	15.7663450241089	16.0033493041992	15.6565380096436	15.9607992172241	15.9898138046265	16.1511840820313	15.9741239547729	16.0080089569092	15.8816585540771	DENR	O43583
14.8372106552124	15.0591201782227	14.8673114776611	14.8852672576904	14.8862676620483	14.8212375640869	14.9690017700195	15.2080898284912	14.6407346725464	15.0252914428711	XPOT	O43592
16.2131328582764	15.8597326278687	16.0069408416748	15.994833946228	16.0695705413818	15.9073190689087	15.8958415985107	15.845890045166	15.9324159622192	15.8200225830078	TIMM44	O43615
14.5142049789429	15.2590799331665	15.1189136505127	15.0423336029053	15.2359056472778	15.1314706802368	15.195460319519	15.4870824813843	15.1929864883423	15.2815237045288	TRAPPC3	O43617
16.1579093933105	16.3371105194092	16.1379089355469	16.1869583129883	15.8800344467163	15.997612953186	16.3211097717285	16.0962352752686	16.1876811981201	16.2277393341064	CHMP2A	O43633
14.9093446731567	15.1124420166016	15.2848110198975	15.2504892349243	15.1412010192871	14.94704246521	15.0584945678711	14.9261655807495	14.9926233291626	14.9968280792236	PLRG1	O43660
12.9411973953247	12.6024932861328	13.0614442825317	13.1844282150269	12.7987861633301	12.8892049789429	13.0564336776733	11.87575340271	12.8337163925171	12.3954811096191	PRC1	O43663
14.1545438766479	14.5873765945435	14.4018840789795	14.555760383606	14.5083999633789	14.734091758728	14.8237924575806	14.7088565826416	14.536904335022	14.5999622344971	RGS10	O43665
16.8453712463379	16.0831928253174	16.360164642334	16.3128223419189	15.8817567825317	15.7622375488281	16.1797351837158	15.9148025512695	16.0339603424072	15.9158821105957	NDUFA2	O43678
17.3856048583984	17.7536487579346	17.6488590240479	17.5185146331787	17.7171497344971	17.6910934448242	17.6563587188721	17.5713310241699	17.7403259277344	17.7095718383789	GET3	O43681
19.9849052429199	20.204963684082	20.0122585296631	20.1550922393799	20.0310115814209	20.1674861907959	20.0972213745117	20.0325241088867	20.1084136962891	20.1993236541748	ACTN4	O43707
14.1391000747681	13.9189195632935	14.0913238525391	14.404275894165	14.2236986160278	14.5069770812988	14.2429046630859	14.1995449066162	14.0011739730835	14.2433891296387	BUD23	O43709
14.7152986526489	14.6934909820557	15.0321207046509	14.794041633606	14.7137985229492	14.5278053283691	15.0230102539063	14.6632461547852	14.6249284744263	14.5628252029419	HTATSF1	O43719
15.1949415206909	15.6098327636719	15.4744958877563	15.2621974945068	15.7533445358276	15.4508104324341	15.4102001190186	15.8419342041016	15.4936895370483	15.5477418899536	AP1G1	O43747
11.6188488006592	12.9165105819702	13.4545402526855	13.123571395874	12.7114591598511	12.6950750350952	13.3188018798828	13.1775979995728	13.0688924789429	13.1382236480713	STX6	O43752
14.3775911331177	14.6941184997559	14.9108762741089	14.6118593215942	14.3995275497437	14.6264019012451	15.2281122207642	14.6124382019043	14.5407428741455	15.0172567367554	ENSA	O43768
17.3164386749268	17.7122383117676	17.6165065765381	17.5795440673828	17.729959487915	17.6232776641846	17.7665939331055	17.6864013671875	17.7577362060547	17.7584037780762	NARS1	O43776
11.5713014602661	12.6639547348022	12.4607954025269	12.9589099884033	11.9591455459595	13.0315713882446	13.2663116455078	12.4755144119263	12.1783113479614	12.9359426498413	SSNA1	O43805
19.1827907562256	19.2640609741211	19.211820602417	19.2099094390869	19.565336227417	19.2737274169922	19.2070121765137	19.275806427002	19.3468036651611	19.237491607666	NUDT21	O43809
16.5848560333252	17.0711135864258	16.7782001495361	16.8358325958252	16.890438079834	16.9619045257568	16.8472862243652	17.2413330078125	16.8069915771484	17.0979175567627	LANCL1	O43813
16.0253028869629	15.6688642501831	15.7017068862915	15.7980985641479	15.6110210418701	15.7592926025391	15.7534637451172	16.0413875579834	15.7278671264648	15.7236804962158	STRN	O43815
15.6325311660767	15.2599334716797	15.5188360214233	15.3683605194092	15.2837572097778	15.2237701416016	15.427978515625	15.2166566848755	15.2288579940796	15.1405181884766	RRP9	O43818
14.7442502975464	14.66330909729	14.64342212677	14.6359367370605	15.2518119812012	14.7901773452759	13.8197002410889	14.7700672149658	14.9629783630371	14.7529315948486	SCO2	O43819
13.0943441390991	11.9272613525391	13.3074989318848	13.309365272522	12.9583854675293	12.9683313369751	13.2847623825073	12.1227197647095	13.2367973327637	13.1293478012085	GTPBP6	O43824
14.2898464202881	15.1345596313477	14.9532918930054	15.2586269378662	15.4545946121216	15.2966318130493	14.7185258865356	15.2646751403809	14.9047927856445	15.1394443511963	SLC37A4	O43826;U3KPU7;U3KQL4;U3KQS2
13.8594408035278	14.6948871612549	14.3247699737549	14.4992151260376	14.6484336853027	14.7151508331299	14.5781011581421	14.8098783493042	14.6013746261597	14.7266731262207	NRDC	O43847
17.1103382110596	17.1301975250244	17.4426403045654	17.3463401794434	17.5226783752441	17.2805709838867	17.4329719543457	16.9679698944092	17.4641265869141	17.2007389068604	CALU	O43852
16.8282928466797	16.7769393920898	16.6902465820313	16.6227607727051	16.7717094421387	16.8141117095947	16.8426895141602	16.9620590209961	16.8663387298584	16.8315620422363	AHCYL1	O43865
14.8125600814819	14.9489059448242	15.2364387512207	15.0321416854858	15.1856708526611	14.6582193374634	14.91796875	14.9308824539185	15.1555776596069	14.7809705734253	NDUFS5	O43920
12.1562566757202	12.8943538665771	12.8993997573853	12.9959135055542	12.9273700714111	12.6188564300537	13.0489158630371	11.4351415634155	12.6270637512207	12.2248992919922	ORC4	O43929
16.1639022827148	15.9826354980469	16.0591697692871	15.9944438934326	15.8542966842651	15.9163093566895	16.0629005432129	15.9715156555176	16.0605125427246	15.9829597473145	RAD21	O60216
14.416784286499	13.4382266998291	13.7567806243896	13.6347455978394	15.1341772079468	14.7348880767822	14.7792644500732	15.1192893981934	15.0999031066895	14.8077411651611	AKR1B10	O60218
13.4917488098145	10.7843141555786	10.760443687439	12.5003070831299	11.0328893661499	11.9531421661377	12.6164455413818	11.9801168441772	11.7719678878784	12.6002168655396	TIMM8A	O60220
17.2833118438721	17.4341468811035	17.5292453765869	17.5613269805908	17.5496616363525	17.5391750335693	17.5811500549316	17.4743270874023	17.591724395752	17.5360698699951	DHX16	O60231
14.2339668273926	14.6223030090332	14.5885438919067	14.6636562347412	14.6566295623779	14.5772724151611	14.5894327163696	14.9800024032593	14.5274686813354	14.7572822570801	PRPSAP2	O60256
15.6021003723145	16.0678005218506	16.0522594451904	15.9668579101563	16.1400604248047	15.9636058807373	15.9006776809692	15.7674779891968	15.9756507873535	15.8209428787231	SMARCA5	O60264
15.4874315261841	15.6974868774414	15.4908447265625	15.6197633743286	15.4849824905396	15.6592807769775	15.5982646942139	15.776819229126	15.5466566085815	15.7828741073608	SPAG9	O60271
12.8653783798218	13.4152355194092	13.4355401992798	13.6193723678589	13.3195581436157	12.8408174514771	13.1042213439941	13.1767120361328	13.4846172332764	13.2664318084717	URB1	O60287
14.027473449707	13.6091032028198	13.6603193283081	14.1563863754272	13.4676094055176	13.4169540405273	13.6973533630371	13.4588470458984	13.6511468887329	13.2014284133911	SIPA1L3	O60292
14.6641864776611	14.7854795455933	14.8865690231323	15.0016736984253	14.8967351913452	14.7930126190186	14.8327264785767	14.156156539917	14.8201780319214	14.5978403091431	AQR	O60306
13.1230974197388	12.0428066253662	13.0066728591919	12.6310043334961	13.022198677063	12.3534145355225	12.9008836746216	13.0023775100708	13.0846872329712	12.603476524353	MCM3AP	O60318
15.8472747802734	15.681978225708	15.7753467559814	15.6745901107788	15.761266708374	15.5709781646729	15.5726547241211	15.9008674621582	15.6383533477783	15.5350322723389	KDM1A	O60341;R4GMQ1
7.28422451019287	9.7573299407959	10.3404941558838	10.1698989868164	9.76420307159424	9.39613056182861	10.1655654907227	10.7037658691406	10.0982065200806	9.96336269378662	TBC1D12	O60347
13.7318515777588	12.9404573440552	13.5072259902954	13.2820796966553	13.2950391769409	13.0067958831787	13.416561126709	13.014422416687	13.4298343658447	13.1132326126099	FZD6	O60353
13.9316482543945	11.3733949661255	11.757622718811	12.4832201004028	10.8275489807129	12.3758239746094	11.9634714126587	10.7244892120361	12.6144132614136	11.970799446106	MAN1A2	O60476
14.3597974777222	14.2332773208618	14.7526016235352	14.2591896057129	15.0489912033081	14.2028493881226	14.6191596984863	14.2118701934814	14.7878303527832	14.2837038040161	ACSL4	O60488
17.6180057525635	17.6707820892334	17.4385604858398	17.6296405792236	17.5441303253174	17.7311630249023	17.7131385803223	17.7365303039551	17.6761054992676	17.7176914215088	SNX3	O60493
14.1824054718018	14.831335067749	14.3355398178101	14.6496744155884	14.3504810333252	14.7655639648438	14.5999193191528	14.7493238449097	14.4723968505859	14.9658575057983	OGA	O60502
18.6441440582275	19.0373916625977	18.9164638519287	18.9974155426025	18.9194984436035	18.9949150085449	19.1225776672363	18.8142700195313	19.0469703674316	19.1500682830811	SORBS3	O60504
19.8439445495605	19.8348827362061	19.8737545013428	19.9016628265381	19.7822570800781	19.8048248291016	19.8685512542725	19.7274551391602	19.8783416748047	19.839391708374	SYNCRIP	O60506
14.762734413147	14.1275014877319	14.2454433441162	14.5877494812012	14.1037349700928	13.9835166931152	14.3990297317505	13.8889169692993	13.9281644821167	13.5956468582153	CDC40	O60508;Q5SRN1
14.6715431213379	14.8794546127319	14.8277702331543	14.8728656768799	14.4339265823364	14.7210712432861	14.7508373260498	14.5348043441772	14.45641040802	14.6663074493408	NEMF	O60524
15.4004936218262	16.0656261444092	16.1039943695068	15.860390663147	16.217809677124	16.1462841033936	16.0241661071777	16.2487125396729	16.1559410095215	16.1744823455811	GMDS	O60547
12.8315544128418	13.0560283660889	13.1752233505249	13.0843095779419	13.4109420776367	13.2650117874146	13.2730226516724	13.8920917510986	13.1352472305298	13.0347661972046	NMT2	O60551;Q5VUC6
14.578761100769	14.6063566207886	14.7038431167603	14.7577810287476	14.5579442977905	14.4465837478638	14.6984901428223	14.4384727478027	14.4314489364624	14.3455743789673	CCNT1	O60563
12.9191837310791	13.1843948364258	13.0507717132568	13.3983058929443	13.007716178894	13.3365888595581	13.4446821212769	12.9768695831299	13.0479755401611	13.2814569473267	BUB1B	O60566
15.075611114502	15.0559368133545	14.9833164215088	15.1778030395508	15.0714387893677	14.9699039459229	15.0099430084229	15.0293865203857	15.0027370452881	15.0206413269043	PLOD3	O60568
16.2661151885986	16.9165821075439	16.8111038208008	16.832633972168	17.1806297302246	16.8371601104736	16.7648124694824	17.1392440795898	16.8638820648193	16.9261665344238	EIF4E2	O60573
12.0393848419189	10.6689920425415	11.105224609375	11.9714460372925	11.8774795532227	11.2594766616821	11.8631753921509	11.8212261199951	11.5977344512939	11.7239618301392	CCNT2	O60583
14.3241748809814	14.3845806121826	14.3688373565674	14.2426929473877	14.3949413299561	14.2479553222656	14.3827333450317	14.0628814697266	14.4830942153931	14.4097175598145	EXOC3	O60645
18.7842350006104	18.8499374389648	18.7174167633057	18.7113056182861	18.7622451782227	18.8305149078369	19.0085487365723	18.9537544250488	18.8719482421875	18.9959526062012	PLIN3	O60664
17.5491275787354	10.8461322784424	16.3293342590332	11.0855283737183	17.0142841339111	12.0816793441772	15.5922136306763	12.3073740005493	11.5405693054199	9.36824607849121	SLC16A7	O60669
13.0956363677979	13.2762422561646	13.1323089599609	13.2282752990723	13.3692464828491	13.5153093338013	13.312029838562	13.7117223739624	13.3546104431152	13.5613298416138	PRMT3	O60678
16.0922622680664	16.0735740661621	15.9763555526733	15.7952260971069	16.045934677124	16.0207672119141	16.0347843170166	15.9392719268799	15.967737197876	16.09619140625	KPNA6	O60684
18.3621654510498	18.4943027496338	18.3990783691406	18.3419914245605	18.6221561431885	18.5215492248535	18.5885677337646	18.767858505249	18.5947761535645	18.6729316711426	UGDH	O60701
14.3395910263062	14.0095911026001	14.3206014633179	14.1500520706177	14.0807332992554	13.9723443984985	14.1443185806274	14.249400138855	14.1244649887085	14.0796518325806	ICMT	O60725
17.0593299865723	17.082275390625	17.0155754089355	16.9688987731934	16.9332313537598	16.9880847930908	17.1898517608643	17.1713256835938	17.0285816192627	17.1309967041016	SNX2	O60749
15.8268404006958	16.0988368988037	16.1411762237549	16.0378150939941	16.0887145996094	15.9970407485962	16.2243938446045	16.2316246032715	16.1911602020264	16.1733322143555	USO1	O60763
15.333553314209	14.4723558425903	14.7238721847534	14.8384160995483	14.7023773193359	14.2651138305664	14.7925891876221	14.4851512908936	14.5816841125488	14.451922416687	MRPS14	O60783
14.7511720657349	14.2629489898682	14.5047187805176	14.3917837142944	14.1398324966431	14.1811571121216	14.4988021850586	14.4208755493164	14.4660968780518	14.7065935134888	TOM1	O60784
15.673267364502	15.7947158813477	15.5603590011597	15.6953210830688	15.4250650405884	15.6382503509521	15.5918645858765	15.5807123184204	15.6169013977051	15.769362449646	CCDC22	O60826
16.8333396911621	15.9404010772705	16.5099506378174	16.5206394195557	16.2595348358154	16.3693790435791	16.57057762146	16.2337532043457	16.1928634643555	16.3653373718262	PQBP1	O60828
14.3088302612305	13.8192234039307	14.3720369338989	13.993860244751	13.5367031097412	12.9287519454956	13.7878379821777	12.81263256073	13.9052219390869	12.9943695068359	TIMM17B	O60830;V9GYS0;V9GYU0
16.7371883392334	16.4579963684082	16.6033554077148	16.5732879638672	16.5163269042969	16.3620929718018	16.4198455810547	16.4650230407715	16.4189128875732	16.281759262085	DKC1	O60832
16.9842681884766	17.076717376709	16.8902606964111	17.0441284179688	17.204044342041	17.1194934844971	17.1366844177246	16.6917533874512	17.0208549499512	16.9828815460205	EDF1	O60869
16.1203918457031	16.6890926361084	16.5550956726074	16.480884552002	16.7604293823242	16.6449661254883	16.5236587524414	16.6601085662842	16.6024227142334	16.4301242828369	DNAJA2	O60884
15.1417446136475	14.9445600509644	15.1179389953613	15.0536527633667	15.1308507919312	14.8238763809204	15.2712860107422	15.0604696273804	15.0594387054443	15.1012105941772	BRD4	O60885
18.1569213867188	17.8682193756104	17.8418865203857	17.8656139373779	17.5942611694336	17.8959903717041	17.9897155761719	17.5446014404297	17.6191730499268	17.6807899475098	PFDN1	O60925
13.7576341629028	14.6478137969971	14.3999423980713	14.1978416442871	13.9019994735718	14.4716110229492	14.4899854660034	12.7232122421265	14.2430629730225	14.2049627304077	PPP1R11	O60927
15.4475889205933	15.7292423248291	15.9857416152954	15.7327365875244	15.6680812835693	15.5875997543335	15.8928575515747	15.9075984954834	15.8154134750366	15.7744655609131	NBN	O60934
12.1790132522583	13.2211456298828	12.928581237793	12.9332618713379	13.3966026306152	13.2713651657104	12.9716825485229	12.2991895675659	13.1738176345825	13.0355224609375	RNGTT	O60942
13.4764451980591	12.6175746917725	13.0079879760742	12.6396350860596	12.589015007019	12.2555236816406	12.9588298797607	13.0301914215088	12.7902154922485	12.6360158920288	IGSF3	O75054
18.2151298522949	18.6685962677002	18.3643627166748	18.5079250335693	18.5984401702881	18.7211322784424	18.5581130981445	18.6989364624023	18.5389003753662	18.7732563018799	WDR1	O75083
14.6645851135254	14.7439470291138	14.8117980957031	14.7598905563354	14.785590171814	14.7582950592041	14.9511594772339	14.9115581512451	14.9188013076782	14.9724292755127	ROCK2	O75116
15.5198230743408	16.3252239227295	16.1320991516113	16.0560569763184	16.7676334381104	16.3230972290039	16.5403442382813	16.6630516052246	16.4103031158447	16.5307750701904	CPNE3	O75131
15.0698070526123	15.1322507858276	15.119119644165	15.2144804000854	14.9119815826416	14.9202661514282	14.93274974823	15.158299446106	15.1083011627197	15.0945825576782	HIP1R	O75146
13.8331441879272	10.9809942245483	14.0228462219238	11.761435508728	12.6893615722656	12.8269071578979	14.7755689620972	12.3387022018433	9.84996604919434	13.3414630889893	PHF2	O75151
13.5668878555298	12.8192358016968	13.4555759429932	13.1182098388672	13.2825517654419	13.1160850524902	13.4120855331421	13.1800842285156	13.1034889221191	12.834864616394	ZC3H11A	O75152
13.4381694793701	13.5671796798706	12.9624423980713	12.7523002624512	12.8026914596558	13.0845546722412	13.0346393585205	10.6205978393555	13.0449771881104	13.2789897918701	TSC22D2	O75157
14.7184944152832	14.9125938415527	14.8688373565674	14.8458023071289	14.8593873977661	14.7519865036011	14.7939548492432	14.9485216140747	14.8488254547119	14.8653545379639	DNAJC13	O75165
15.6785869598389	15.2879304885864	15.4613275527954	15.3782081604004	15.2456741333008	15.3671598434448	15.3585052490234	15.2801456451416	15.2023181915283	15.219443321228	CNOT3	O75175
11.3496017456055	13.5386533737183	13.276065826416	13.0343570709229	13.5953321456909	13.4407262802124	13.873854637146	14.0700454711914	13.5057306289673	13.7154598236084	GGCT	O75223
15.3901243209839	15.6070508956909	15.8142690658569	15.6968994140625	15.8942165374756	15.4323701858521	15.6119985580444	15.4459428787231	15.7413606643677	15.5545644760132	NDUFS2	O75306
12.7221231460571	11.1966381072998	10.7164125442505	9.57532978057861	11.7947492599487	10.9821138381958	11.9177055358887	10.9969367980957	11.1032152175903	9.61359405517578	DUSP11	O75319
16.1356773376465	15.7043991088867	15.7948656082153	15.9765453338623	15.6186628341675	15.5832567214966	15.7171220779419	15.5622434616089	15.6478176116943	15.4621467590332	NIPSNAP2	O75323
16.5411128997803	17.020824432373	16.8020057678223	16.8203315734863	17.1391201019287	17.0500602722168	17.0534210205078	17.2889442443848	17.0311851501465	17.111722946167	PDCD6	O75340
16.2224254608154	16.2700786590576	16.5235023498535	16.4130420684814	16.2384967803955	16.3868541717529	16.5765190124512	16.3351402282715	16.4112186431885	16.3976173400879	ATP6V1G1	O75348
17.1090717315674	17.0675487518311	16.9989547729492	16.9571685791016	16.9651145935059	17.102165222168	17.1825580596924	17.2146854400635	17.1312141418457	17.2172412872314	VPS4B	O75351
19.5010032653809	19.0492935180664	19.2626323699951	19.2106819152832	19.0659999847412	18.9893589019775	19.1082935333252	19.007776260376	19.0820960998535	18.9112224578857	MACROH2A1	O75367
16.0485019683838	16.1478939056396	15.7573261260986	15.7855987548828	15.7855806350708	16.0131874084473	16.4640846252441	16.4647026062012	16.148250579834	16.4051284790039	SH3BGRL	O75368
19.4643306732178	19.4209651947021	19.308801651001	19.376745223999	19.4330043792725	19.3812770843506	19.3816890716553	19.4910488128662	19.4691600799561	19.4819869995117	FLNB	O75369
12.8432817459106	11.3148784637451	12.4647254943848	12.6394662857056	12.2119626998901	11.8521118164063	12.0843172073364	11.8251190185547	12.4260025024414	12.0094013214111	NCOR1	O75376
14.2362565994263	13.8111009597778	14.5827560424805	14.075267791748	14.4644603729248	14.0657348632813	14.4543952941895	14.1896572113037	14.1435441970825	14.217791557312	NDUFS6	O75380
13.1270933151245	13.7616205215454	14.0211668014526	13.7868700027466	14.2498540878296	13.7792720794678	14.0045566558838	14.2078294754028	13.9276103973389	13.825493812561	PEX14	O75381
13.5797986984253	13.4897890090942	13.7130670547485	13.4179725646973	13.3920497894287	13.363486289978	13.3927621841431	12.8843631744385	13.4826326370239	13.3829727172852	MRPL33	O75394
18.4506492614746	17.9345779418945	18.0743541717529	17.8881893157959	17.9146213531494	17.7488040924072	17.9155235290527	17.6484813690186	17.9309749603271	17.7882957458496	SEC22B	O75396
15.2425756454468	15.0763902664185	15.2787284851074	15.2083873748779	15.0753765106201	15.0069370269775	15.3696870803833	14.9198045730591	15.1131763458252	15.1311817169189	TACC1	O75410
10.9284429550171	9.8411865234375	10.572958946228	10.3894472122192	10.3986835479736	10.7213163375854	11.1302080154419	10.5767459869385	10.4245643615723	11.4873418807983	LRCH4	O75427
13.6738653182983	14.4651870727539	14.5451335906982	14.5941524505615	14.2321348190308	14.1285467147827	14.2589445114136	13.5953798294067	14.4211578369141	13.9444074630737	MTX2	O75431
17.2348670959473	17.9809131622314	17.9300708770752	17.7729988098145	18.4163837432861	17.9832229614258	18.0977687835693	18.3762817382813	18.1844844818115	18.2429275512695	VPS26A	O75436
16.4671974182129	15.8836870193481	16.1998348236084	16.237491607666	15.4640636444092	15.7242450714111	15.8313341140747	15.7784519195557	15.8691682815552	15.6796092987061	NDUFB1	O75438
16.469274520874	16.2353630065918	16.2019157409668	16.1607284545898	15.934024810791	16.0123481750488	15.8869743347168	16.0701713562012	15.991587638855	16.0369033813477	PMPCB	O75439
12.8277492523193	13.3223733901978	12.9297323226929	13.0039939880371	13.1777057647705	13.4643201828003	12.9831619262695	12.9910125732422	13.0336503982544	13.3886213302612	KATNA1;KATNAL1	O75449;Q9BW62
16.0973281860352	16.1928825378418	16.5921249389648	16.3506717681885	16.4436054229736	16.3441734313965	16.3495273590088	16.1987152099609	16.4002361297607	16.1901874542236	PSIP1	O75475
14.6508264541626	15.0014276504517	14.8461437225342	14.8885917663574	14.8980150222778	14.9045085906982	14.7569150924683	14.9586200714111	14.9753665924072	14.8241195678711	ERLIN1	O75477
12.6398458480835	13.1232986450195	12.9576511383057	12.9393634796143	13.1754684448242	12.7379198074341	13.0958862304688	13.0987548828125	13.116868019104	13.1296644210815	GPC4	O75487
17.4382476806641	16.8702163696289	16.9804859161377	16.9201335906982	16.8714256286621	16.7552299499512	16.7962055206299	17.0748062133789	16.8583488464355	16.6685218811035	NDUFS3	O75489
17.3318767547607	16.8668403625488	17.1635761260986	17.1762161254883	16.8011283874512	16.9250202178955	17.0160789489746	16.4546852111816	16.9014911651611	16.6217575073242	SRSF10	O75494;Q5JRI1
14.2095012664795	14.2231664657593	14.12144947052	14.2670927047729	13.7144689559937	13.8769178390503	14.0665855407715	13.390754699707	13.9785175323486	13.7402830123901	KHDRBS3	O75525
17.0621929168701	16.5388336181641	15.5773963928223	16.666690826416	14.0495653152466	16.0919761657715	12.1130247116089	15.6959714889526	16.4964618682861	15.8138494491577	RBMXL2	O75526
10.0020732879639	11.900447845459	11.9453029632568	11.6393022537231	11.2609510421753	11.3439645767212	11.6892976760864	11.5572452545166	11.8288984298706	11.3772096633911	EED	O75530
16.7139625549316	16.5193576812744	16.1311779022217	16.4570369720459	16.1334857940674	16.2024879455566	15.9308471679688	15.2194089889526	15.9774951934814	16.0580444335938	BANF1	O75531
16.7679843902588	16.7610416412354	16.9168643951416	16.8308067321777	16.9103183746338	16.7417030334473	16.8294296264648	16.8657512664795	16.8496322631836	16.7526416778564	SF3B1	O75533
16.7397041320801	16.9814796447754	16.9583187103271	16.9365768432617	17.0050067901611	17.0389862060547	16.9802379608154	17.1779327392578	16.9741725921631	16.9983501434326	CSDE1	O75534
14.356858253479	10.0989055633545	13.7339677810669	14.2328596115112	11.6167993545532	14.1201782226563	14.0730953216553	13.9098978042603	11.3554706573486	13.7053623199463	WBP4	O75554
16.1454162597656	15.9946327209473	15.9809789657593	16.0718078613281	15.779821395874	15.8861093521118	16.0161952972412	15.5783710479736	15.8957653045654	15.8307485580444	PRKRA	O75569
16.5616588592529	16.2106990814209	16.1555595397949	16.2631320953369	16.1407604217529	16.1400604248047	15.9804382324219	16.0996074676514	15.9783525466919	16.0679740905762	NPM3	O75607
16.1106262207031	16.4383335113525	16.2272796630859	16.2844886779785	16.5165519714355	16.5620021820068	16.5383834838867	16.996789932251	16.4141235351563	16.6080093383789	LYPLA1	O75608
15.9661178588867	15.6178064346313	15.6587648391724	15.7112426757813	15.5617427825928	15.5458745956421	15.5456418991089	15.4969434738159	15.5944938659668	15.446816444397	ERAL1	O75616
19.660249710083	19.9344139099121	20.0081043243408	19.8922996520996	20.1194877624512	19.9088096618652	19.8520889282227	19.9750747680664	19.9608993530273	19.8570938110352	SNRNP200	O75643
14.2337856292725	16.0712585449219	15.5197601318359	15.5779933929443	15.8190240859985	15.8137426376343	15.2397174835205	15.504054069519	15.5491161346436	15.795093536377	TIPRL	O75663
16.1649627685547	15.4634008407593	15.9689512252808	16.0685920715332	15.5283765792847	15.5373163223267	15.8520517349243	15.3359565734863	15.6286296844482	15.5171356201172	SURF6	O75683
15.4779233932495	15.2517004013062	15.3179769515991	15.3993797302246	15.1491651535034	15.3202724456787	15.4524545669556	15.4210443496704	15.2168083190918	15.3852014541626	PPM1B	O75688
14.2212266921997	14.2176294326782	14.3951225280762	14.3745861053467	14.1181297302246	14.1090412139893	14.2047595977783	14.0609827041626	14.1965656280518	14.0462951660156	UTP20	O75691
12.6079807281494	13.5696382522583	14.0501365661621	13.2795000076294	13.9949645996094	13.5543794631958	13.8050785064697	13.6095085144043	13.8602523803711	13.5211496353149	RP2	O75695
14.4308557510376	14.5851001739502	14.6058187484741	14.6818046569824	14.5194835662842	14.6596574783325	14.7552223205566	14.4793491363525	14.5387840270996	14.4494180679321	WDHD1	O75717
15.9748010635376	16.2701377868652	16.3872146606445	16.3062438964844	16.3711490631104	16.1587524414063	16.1776752471924	16.5937557220459	16.302921295166	16.3040924072266	SLC25A12	O75746
20.4627113342285	19.994945526123	20.0742435455322	20.0497035980225	19.8352012634277	19.8715057373047	19.6772346496582	19.711669921875	19.759126663208	19.7921524047852	PALM	O75781
13.2784452438354	13.4057865142822	13.1190004348755	13.2692451477051	13.1839895248413	13.4417495727539	13.2238273620605	13.1374835968018	13.1944589614868	13.1959714889526	RNASEH2A	O75792
13.6786947250366	14.1347007751465	13.3474369049072	14.1971530914307	13.8320169448853	14.0611267089844	13.820746421814	13.877537727356	13.4152898788452	13.7880954742432	CDC123	O75794
10.5299510955811	11.9770822525024	12.1395263671875	12.4358673095703	11.6022262573242	10.9581203460693	11.2613515853882	10.4843244552612	11.270528793335	10.7529439926147	BCAR3	O75815
16.6962947845459	16.7657928466797	16.8953113555908	16.7587223052979	17.0536556243896	16.9668750762939	17.0128269195557	17.0581912994385	17.0332431793213	16.9640579223633	EIF3G	O75821
15.0618200302124	15.121356010437	15.0795240402222	15.1322240829468	15.346134185791	15.2812747955322	15.2493743896484	15.3589773178101	15.1338901519775	15.2709722518921	EIF3J	O75822
15.9034738540649	15.7156419754028	15.6691732406616	16.0131130218506	15.5565032958984	15.6842365264893	15.0525045394897	15.6534442901611	15.5595998764038	15.6590576171875	CBR3	O75828
15.8296165466309	15.7260208129883	15.8676605224609	15.4930763244629	15.9025506973267	15.666898727417	15.5209245681763	15.7948045730591	15.6261501312256	15.5627584457397	ZMPSTE24	O75844
17.2437953948975	17.6321926116943	17.5166816711426	17.5196552276611	17.6394634246826	17.547758102417	17.7781925201416	17.8104515075684	17.7687759399414	17.8113574981689	IDH1	O75874
13.5277090072632	13.2193393707275	13.5425462722778	13.2989540100098	13.4298467636108	13.3717060089111	12.8512229919434	13.0850391387939	13.2483282089233	13.3340034484863	ATRN	O75882
14.5715532302856	15.0943059921265	14.9967012405396	15.0419340133667	14.8890171051025	14.9970254898071	15.4435405731201	14.7764701843262	15.2291011810303	15.3360395431519	RBBP9	O75884
13.8892726898193	14.4469480514526	14.5929107666016	14.9739923477173	14.6099739074707	14.7712249755859	14.7321710586548	14.9138631820679	14.497579574585	14.5063209533691	STAM2	O75886
15.9247188568115	16.1720161437988	16.39670753479	16.162296295166	16.6788368225098	16.2129497528076	16.2239971160889	16.5606842041016	16.3935623168945	16.2938537597656	ARL6IP5	O75915
13.5314970016479	13.0601959228516	13.051718711853	13.5515813827515	12.7557916641235	13.2239141464233	13.1728115081787	12.8039617538452	13.1399097442627	13.2323608398438	DYSF	O75923
14.2815046310425	14.0389251708984	14.2118911743164	14.1704244613647	14.0554542541504	14.039345741272	14.1122608184814	13.9559364318848	14.0907897949219	13.9320068359375	BCAS2	O75934
15.4314126968384	15.5813875198364	15.8808975219727	15.5794534683228	16.0377635955811	16.0767498016357	16.0237064361572	15.9579343795776	15.992395401001	16.009786605835	DCTN3	O75935;X6RCK5
15.5504627227783	16.098445892334	16.3105983734131	16.1632404327393	16.0618362426758	16.1559906005859	16.466516494751	15.9331016540527	16.3758792877197	16.0783615112305	DNAJC8	O75937
16.3337650299072	15.9005813598633	16.1015815734863	16.0350399017334	15.8542947769165	15.8476076126099	15.6213502883911	15.8789939880371	15.5066452026367	15.6433696746826	SMNDC1	O75940
19.8951663970947	19.490779876709	19.6497116088867	19.576545715332	19.4170169830322	19.379487991333	19.4902172088623	19.3357009887695	19.4340152740479	19.2864303588867	ATP5PD	O75947
17.4493579864502	17.0770626068115	17.2310848236084	17.072940826416	17.2108116149902	16.772481918335	17.0695095062256	16.9251499176025	17.1608905792236	16.9781322479248	FLOT1	O75955
11.9003486633301	12.9310703277588	12.9191780090332	12.7892446517944	12.8854169845581	13.1356897354126	13.0926504135132	13.1866235733032	12.9186239242554	12.9834537506104	TRIO	O75962
18.8744506835938	18.7955989837646	18.8341541290283	18.6821632385254	18.9855842590332	18.6423015594482	18.5590724945068	18.8763484954834	18.7821369171143	18.6465358734131	ATP5MG	O75964
15.9560070037842	15.9273414611816	16.0221576690674	15.9377737045288	15.9081535339355	15.7763347625732	16.0283908843994	15.866415977478	16.0419273376465	15.7927923202515	CPD	O75976
14.4524383544922	15.1642217636108	15.3024482727051	15.1923093795776	15.8318090438843	15.3884048461914	15.725682258606	15.8091087341309	15.6935815811157	15.5652751922607	GLRX3	O76003
17.9870567321777	17.4603786468506	17.7337226867676	17.7436447143555	17.5914459228516	17.6337108612061	17.4192371368408	17.5673751831055	17.5018939971924	17.4139461517334	RSL1D1	O76021
15.6148090362549	15.3897657394409	15.6992692947388	15.613790512085	15.4556093215942	15.264217376709	15.4368391036987	15.3974781036377	15.4465703964233	15.2170763015747	CLPX	O76031
16.4103355407715	16.4467868804932	16.0201168060303	16.3447647094727	16.4351940155029	16.668628692627	16.4889907836914	16.8277397155762	16.4519424438477	16.7486095428467	SEC14L2	O76054
17.5822505950928	17.6524047851563	17.3018493652344	17.5654907226563	17.6525573730469	17.5823879241943	17.7422275543213	17.8969688415527	17.9007835388184	17.7587375640869	SNCG	O76070
13.9543447494507	14.1209344863892	13.9185876846313	14.1627655029297	14.6545438766479	14.0734615325928	14.4696559906006	13.6460647583008	14.142204284668	13.9395809173584	CIAO1	O76071
15.5000295639038	15.634651184082	15.5743217468262	15.5911426544189	15.7640151977539	15.5913829803467	15.5841903686523	15.8725900650024	15.6255178451538	15.667594909668	SRP72	O76094
14.6886472702026	14.9042730331421	14.8402118682861	15.0361452102661	14.602198600769	14.5438175201416	14.8859958648682	14.291971206665	14.9088220596313	14.8909673690796	DDAH1	O94760
13.0081310272217	13.0704975128174	13.0359182357788	13.2247486114502	13.4180269241333	12.8150758743286	13.369571685791	12.9655303955078	13.2866497039795	13.0926856994629	URI1	O94763
15.8992729187012	15.5176105499268	15.5703535079956	15.6745615005493	15.6060848236084	15.6557807922363	15.5768013000488	15.645245552063	15.448899269104	15.5089626312256	MTA2	O94776
12.9452285766602	13.1589307785034	13.1235780715942	13.3776473999023	13.5526762008667	13.2695169448853	13.3498401641846	13.2345819473267	13.1153554916382	13.2123527526855	STK10	O94804
11.7991437911987	11.1282367706299	6.56162929534912	8.87229347229004	9.79674625396729	13.4823932647705	9.62109279632568	11.3859415054321	12.31325340271	11.7523574829102	TPPP	O94811
15.3993501663208	15.4016799926758	15.8168468475342	14.8963832855225	15.111442565918	14.9971446990967	15.2003259658813	15.2424774169922	15.0300674438477	15.4430999755859	ATG12	O94817
16.9572257995605	16.9751873016357	17.0454978942871	16.979808807373	16.9413967132568	16.8405284881592	16.8645915985107	17.1050243377686	17.0083961486816	16.9225425720215	TOMM70	O94826
18.6931324005127	18.5423946380615	18.6633796691895	18.6269550323486	18.5524559020996	18.1515121459961	18.667064666748	18.4448699951172	18.5588569641113	18.4218883514404	MYO1D	O94832
14.8746757507324	14.5184345245361	14.66455078125	14.5694370269775	14.313588142395	14.2286262512207	14.7389755249023	13.9104661941528	14.3886623382568	14.164532661438	TOX4	O94842
13.0635242462158	13.8013401031494	13.5990324020386	13.624945640564	13.5062322616577	13.7966613769531	13.8333349227905	13.9201278686523	13.709433555603	13.7365550994873	SEC24D	O94855
18.3137626647949	18.3166370391846	18.4137401580811	18.3244724273682	18.3259372711182	18.1966686248779	18.3189086914063	18.4128456115723	18.3243160247803	18.2490272521973	UFL1	O94874
13.9585561752319	14.3452262878418	14.629487991333	14.3465757369995	14.7287759780884	14.4133901596069	14.8341608047485	14.3813171386719	14.6955413818359	14.4181270599365	UBXN7	O94888
17.1188640594482	17.2301368713379	17.1171073913574	17.2341613769531	17.0632476806641	17.1945705413818	17.3537425994873	17.4186325073242	17.1725082397461	17.3592910766602	PLPBP	O94903
18.3586769104004	18.087869644165	18.1026916503906	18.1363639831543	17.9539184570313	18.0044269561768	17.9000415802002	18.0561866760254	17.9560375213623	18.0176982879639	ERLIN2	O94905
17.0240230560303	16.8980388641357	16.8933277130127	16.9704818725586	16.7050399780273	16.8428955078125	16.789909362793	16.8152332305908	16.7749195098877	16.7225017547607	PRPF6	O94906
14.8161783218384	14.5232610702515	14.7831659317017	14.7611103057861	14.5002202987671	14.6640996932983	14.6389760971069	14.643837928772	14.5727577209473	14.4840154647827	ENDOD1	O94919
18.6398448944092	18.7183113098145	18.9289836883545	18.7251148223877	18.9345512390137	18.6140441894531	18.7057971954346	18.7967224121094	18.8500633239746	18.6141738891602	GLS	O94925
12.4613256454468	12.8600215911865	12.2809028625488	12.838719367981	12.7433948516846	12.3306255340576	12.6264095306396	12.5533266067505	12.7051153182983	12.6786737442017	HAUS5	O94927
14.8298044204712	14.7874774932861	14.6724891662598	14.7788333892822	14.5704946517944	14.7490501403809	14.9107942581177	14.9593849182129	14.6685152053833	15.0705327987671	SOGA1	O94964
16.7075843811035	17.0172672271729	17.0528011322021	16.7879619598389	17.2031326293945	16.7702560424805	16.8921070098877	17.0047016143799	16.961051940918	16.9180927276611	AP2A2	O94973
14.6908540725708	13.2058963775635	14.0511379241943	13.9414110183716	14.0674276351929	13.2152376174927	14.0460643768311	13.0563249588013	13.8991355895996	13.5626249313354	CLSTN1	O94985;Q5SR54
18.9749488830566	18.995189666748	19.1205024719238	19.0270385742188	18.9869728088379	19.0688819885254	19.1005477905273	19.0035533905029	19.0344638824463	18.9674453735352	HEXIM1	O94992
14.7134199142456	14.4810781478882	14.5584917068481	14.6533136367798	14.4854955673218	14.3894090652466	14.5822095870972	14.3126707077026	14.5770349502563	14.4079160690308	UBR5	O95071
9.832444190979	10.1878833770752	10.1770277023315	12.3392009735107	10.4668607711792	10.34730052948	9.67605209350586	10.3320560455322	9.13528728485107	10.9710960388184	AGFG2	O95081
13.0447044372559	12.783727645874	13.1557016372681	12.8703584671021	13.3677759170532	12.6459817886353	13.3318452835083	13.1506795883179	13.2785053253174	12.7843894958496	SCAF4	O95104
12.9966163635254	13.4289073944092	13.6751651763916	13.5525569915771	13.6574554443359	13.7124195098877	13.920295715332	13.9782667160034	13.8847675323486	13.9598636627197	UBE4B	O95155
16.2923049926758	15.7639589309692	15.8836088180542	15.8353214263916	15.8607454299927	15.700852394104	15.4894227981567	15.5062246322632	15.6016139984131	15.6062154769897	ZFPL1	O95159
14.4272661209106	14.149019241333	14.7901926040649	14.6580152511597	14.1229295730591	13.9782018661499	14.858250617981	14.7137069702148	14.5742654800415	14.658350944519	NDUFA3	O95167
17.4003257751465	16.889440536499	16.9744834899902	17.1155967712402	16.9295616149902	16.8221340179443	16.7084884643555	16.9699802398682	16.9616146087646	16.8608951568604	NDUFB4	O95168
16.302526473999	15.9416189193726	16.0983562469482	16.1534900665283	15.5203647613525	15.9223318099976	15.6064767837524	15.6155586242676	15.7229804992676	15.444899559021	NDUFB8	O95169
14.6296644210815	14.193904876709	14.5269632339478	14.5693082809448	14.3316831588745	14.0192203521729	14.4465055465698	14.2458305358887	14.4005641937256	14.372875213623	NDUFA7	O95182
15.5599222183228	15.8845157623291	15.9588441848755	15.6816434860229	16.1309947967529	15.7286081314087	15.6568222045898	15.8045310974121	15.7961664199829	15.7157335281372	RTN3	O95197
16.9822235107422	16.8668785095215	17.0081787109375	16.9388675689697	16.904613494873	16.7418956756592	16.8988552093506	17.0092506408691	16.9071159362793	16.8212242126465	LETM1	O95202
16.1181449890137	16.2156791687012	15.9968309402466	15.9733858108521	16.0016384124756	16.0652713775635	16.0941123962402	15.8694314956665	16.0495510101318	16.003511428833	SNX4	O95219
12.436957359314	13.2303113937378	12.6094512939453	13.3552989959717	12.8149108886719	13.4751672744751	12.8940944671631	12.562463760376	12.5635347366333	12.7472887039185	ZWINT	O95229
11.9323625564575	11.6784172058105	12.2771377563477	12.1710786819458	12.3714036941528	12.4536933898926	12.5901222229004	12.0516529083252	12.212495803833	11.9411630630493	KIF20A	O95235
14.7946968078613	15.0310354232788	15.0147953033447	15.1734523773193	15.0930871963501	15.1999912261963	15.1667346954346	15.1989498138428	15.0597734451294	15.0633144378662	KIF4A	O95239
13.4413986206055	12.7354698181152	12.7668199539185	12.5592985153198	11.9947166442871	12.469425201416	12.6657037734985	13.0382709503174	12.5585498809814	12.4887704849243	SBF1	O95248
17.1075897216797	16.8323154449463	16.9282302856445	17.0191020965576	16.752857208252	16.7124767303467	16.7984256744385	16.7923240661621	16.828239440918	16.8102073669434	VAPB	O95292
14.5606622695923	14.234450340271	14.1293134689331	14.0675220489502	13.7626791000366	14.1631784439087	14.0452909469604	14.2313203811646	13.9052810668945	14.1403465270996	SNAPIN	O95295
16.4555892944336	14.9383296966553	13.2661457061768	14.6429462432861	14.8674278259277	14.3820152282715	13.5583667755127	11.7343845367432	13.2624702453613	13.6182098388672	MPZL1	O95297
15.4235525131226	15.4619846343994	15.8543434143066	15.7140121459961	15.5401086807251	15.2714109420776	15.7312173843384	14.9626388549805	15.5814504623413	15.2147169113159	NDUFC2	O95298
16.9834785461426	16.567268371582	16.5669746398926	16.6489009857178	16.5664501190186	16.5552616119385	16.5245056152344	16.7794227600098	16.355712890625	16.5265827178955	FKBP9	O95302
16.8852405548096	17.2234764099121	16.8453311920166	16.9001274108887	16.8292217254639	17.2421264648438	17.2795391082764	17.5528259277344	17.0720291137695	17.443639755249	PGLS	O95336
15.6061239242554	15.7219667434692	15.5459127426147	15.605975151062	15.7157983779907	15.7951145172119	15.78293800354	15.4955539703369	15.8711214065552	15.9398994445801	PAPSS2	O95340
16.3046035766602	16.4475002288818	16.427791595459	16.435640335083	16.426197052002	16.5084228515625	16.5229663848877	16.5260353088379	16.5392589569092	16.4424095153809	SMC2	O95347
14.6229753494263	15.3087577819824	15.1725463867188	15.074914932251	15.1402530670166	15.2709627151489	15.2747945785522	15.5059785842896	15.1655206680298	15.362645149231	ATG7	O95352
15.625545501709	15.7591819763184	15.7236909866333	15.8100299835205	15.6974306106567	15.8598070144653	16.0642318725586	16.4310932159424	15.8757104873657	15.9071035385132	LYPLA2	O95372
14.9109907150269	15.686469078064	15.7897357940674	15.7092723846436	15.9051818847656	15.705677986145	15.8331308364868	15.8076963424683	15.7605533599854	15.7820081710815	IPO7	O95373
13.0272254943848	13.3052940368652	13.443247795105	13.5189876556396	12.9462890625	13.3515167236328	13.7563610076904	12.8647232055664	13.4753684997559	13.2113695144653	SLU7	O95391
12.0650625228882	13.8365631103516	13.569299697876	14.4383172988892	13.8846893310547	14.0665092468262	14.2522945404053	14.4990358352661	14.0791625976563	14.2026891708374	MOCS3	O95396
[truncated: 3,318 more rows]
